# Supplementary material
Source: HighWire-hosted journal article supplement (doi:10.1101/rna.062687.117)
Supplement: Supplemental_Data_1_PUF4.xlsx [file Supplemental_Data_1_PUF4.xlsx]

## Sheet: Key
Column header	Description
Puf4p target	Systematic name of Puf4p target gene
Name	Name of Puf4p target
Description	Gene description
Class	Puf4p target class for this gene
Mean TRPM U1 (log2)	Mean number of TRPM detected with at least 1 U in the Utag
Mean TRPM U2 (log2)	Mean number of TRPM detected with at least 2 U's in the Utag
Mean TRPM U3 (log2)	Mean number of TRPM detected with at least 3 U's in the Utag
Mean TRPM U4 (log2)	Mean number of TRPM detected with at least 4 U's in the Utag
Mean TRPM U5 (log2)	Mean number of TRPM detected with at least 5 U's in the Utag
Mean TRPM U6 (log2)	Mean number of TRPM detected with at least 6 U's in the Utag
Mean TRPM U7 (log2)	Mean number of TRPM detected with at least 7 U's in the Utag
Mean TRPM U8 (log2)	Mean number of TRPM detected with at least 8 U's in the Utag
PBE from MEME	Enriched sequence present in 3' UTR of target mRNA identified via MEME
PUF3 Target class	Class of this target in the Puf3p data set
PUF5 Target class	Class of this target in the Puf5p data set
Puf4p;KOpuf5 Target Class	Class of this target in the Puf4p;KOpuf5 data set
SEQRS enrichment (9BE)	SEQRS enrichment of the 9BE for this target, mined from: Campbell et al. 2012.
SEQRS enrichment (random 9mer)	SEQRS enrichment of a random 9mer
SEQRS enrichment (8BE)	SEQRS enrichment of the 8BE for this target, mined from: Campbell et al. 2012.
SEQRS enrichment (random 8mer)	SEQRS enrichment of a random 8mer
SEQRS enrichment (10BE)	SEQRS enrichment of the 10BE for this target, mined from: Campbell et al. 2012.
SEQRS enrichment (random 10mer)	SEQRS enrichment of a random 10mer
9BE conservation Score	Conservation score of the PBE across 16 yeast species (16 fully conserved, 0 not present in any species)
log2 RNA decay rate FC (deltaPUF4/WT)	Fold change (log2) of mRNA decay rate (deltaPUF4 strain / wild-type strain); data mined from Sun et al. 2013
RNAseq FPKM	Mean FPKM value from RNAseq data of BY4742 yeast strain, mined from Lapointe et al. 2015
Estimated RNA molecules per cell	Number of estimated mRNA molecules per cell, based off RNAseq (FPKM) and an estimated 36,000 total mRNAs per cell
Protein localization in cell	Localization of GFP tagged proteins, mined from: Huh et al. 2003

## Sheet: Puf4p Target Class Data
Puf4p target	Name	Description	Class	Mean TRPM U1 (log2)	Mean TRPM U2 (log2)	Mean TRPM U3 (log2)	Mean TRPM U4 (log2)	Mean TRPM U5 (log2)	Mean TRPM U6 (log2)	Mean TRPM U7 (log2)	Mean TRPM U8 (log2)	PBE from MEME	Puf3p Target Class	Puf5p Target Class	Puf4p;KOpuf5 Target Class	SEQRS enrichment (9BE)	SEQRS enrichment (random 9mer)	SEQRS enrichment (8BE)	SEQRS enrichment (random 8mer)	SEQRS enrichment (10BE)	SEQRS enrichment (random 10mer)	9BE conservation Score	log2 RNA decay rate FC (deltaPUF4/WT)	RNAseq FPKM	Estimated RNA molecules per cell	Protein localization in cell
YKL172W	EBP2	Required for 25S rRNA maturation and 60S ribosomal subunit assembly; localizes to the nucleolus and in foci along nuclear periphery; constituent of 66S pre-ribosomal particles; cooperates with Rrs1p and Mps3p to mediate telomere clustering by binding Sir4p, but is not involved in telomere tethering	I	9.6703	9.38312	9.05917	8.64601	8.1366	7.22421	5.98594	4.34552	UGUACACUAG		III	I	929	4883	1308	3201	195	307	7	-0.699	157.901	7.00365	NA
YJL122W	ALB1	Shuttling pre-60S factor; involved in the biogenesis of ribosomal large subunit; interacts directly with Arx1p; responsible for Tif6p recycling defects in absence of Rei1p	I	9.02658	8.77463	8.48933	8.03729	7.29447	6.24212	4.62232	2.59809	UGUAUAUUAG	III	II	I	39923	536	61608	769	10714	176	7	-1.102	233.274	10.3468	nucleus
YDL208W	NHP2	Protein related to mammalian high mobility group (HMG) proteins; nuclear protein; essential for function of H/ACA-type snoRNPs, which are involved in 18S rRNA processing	I	8.75682	8.44552	8.1545	7.71875	6.90745	5.56919	3.84964	2.01793	UGUAUAUUAU	III		I	39923	176	61608	1213	7219	4122	4	NA	572.26	25.3824	nucleolus
YLR355C	ILV5	Acetohydroxyacid reductoisomerase and mtDNA binding protein; involved in branched-chain amino acid biosynthesis and maintenance of wild-type mitochondrial DNA; found in mitochondrial nucleoids	I	7.09166	6.98852	6.92299	6.79342	6.48389	6.15291	5.75391	5.17239	UGUACACUAG		IV	I	929	1917	1308	2253	195	244	3	NA	2361.37	104.738	NA
YOL059W	GPD2	NAD-dependent glycerol 3-phosphate dehydrogenase; expression is controlled by an oxygen-independent signaling pathway required to regulate metabolism under anoxic conditions; located in cytosol and mitochondria; constitutively active but is inactivated via phosphorylation by energy-stress responsive kinase SNF1; GPD2 has a paralog, GPD1, that arose from the whole genome duplication	I	8.99785	8.76229	8.53448	8.22144	7.77038	6.77011	5.30591	3.63785	UGUACACUAA	III	II	I	929	10	1308	318	319	3	4	NA	123.067	5.45859	cytoplasm,nucleus
YNL113W	RPC19	RNA polymerase subunit AC19; common to RNA polymerases I and III	I	10.0495	9.8125	9.60838	9.3079	8.78542	7.71606	6.01222	4.11958	UGUAUAAUAU		I	I	44473	3428	67522	3590	9264	1039	7	-0.732	258.89	11.483	nucleolus
YML093W	UTP14	Subunit of U3-containing Small Subunit (SSU) processome complex; involved in production of 18S rRNA and assembly of small ribosomal subunit	I	7.3499	7.08734	6.79228	6.52429	6.1157	5.22343	4.18213	2.81379	UGUAGAAUAG		I	I	9009	80	15995	56	2099	0	2	-0.375	85.7514	3.80348	nucleolus,nucleus
YKR081C	RPF2	Essential protein involved in rRNA maturation and ribosomal assembly; involved in the processing of pre-rRNA and the assembly of the 60S ribosomal subunit; interacts with ribosomal protein L11; localizes predominantly to the nucleolus; constituent of 66S pre-ribosomal particles	I	9.09258	8.70016	8.32122	7.88215	7.14204	5.77459	3.41128	1.61993	UGUAUAUUAU		II	I	39923	56	61608	1129	7219	52	3	-0.507	191.533	8.49536	nucleolus,nucleus
YDR361C	BCP1	Essential protein involved in nuclear export of Mss4p; Mss4p is a lipid kinase that generates phosphatidylinositol 4,5-biphosphate and plays a role in actin cytoskeleton organization and vesicular transport	I	7.38659	7.07907	6.81183	6.42455	5.77171	4.53056	3.16639	1.4699	UGUAUAUUAU		I	I	39923	0	61608	80	7219	1	6	-0.617	109.496	4.85667	cytoplasm,nucleus
YNL182C	IPI3	Component of the Rix1 complex and pre-replicative complexes (pre-RCs); required for processing of ITS2 sequences from 35S pre-rRNA; component of the pre-60S ribosomal particle with the dynein-related AAA-type ATPase Mdn1p; required for pre-RC formation and maintenance during DNA replication licensing; highly conserved protein which contains several WD40 motifs; IPI3 is an essential gene; other me…	I	7.82578	7.50276	7.15225	6.74371	6.05806	4.70584	2.19507	0.744406	UGUACAAUAA		III	I	5820	532	9680	526	2141	22	3	-0.429	127.367	5.64931	NA
YLR363W-A		Protein of unknown function; green fluorescent protein (GFP)-fusion protein localizes to the nucleus; relocalizes from nucleus to nucleolus upon DNA replication stress	I	8.89808	8.59638	8.28003	7.8953	7.28924	6.29144	4.87397	3.16338	UGUAUAUUAG	IV	II	I	39923	216	61608	88	10714	12	2	-1.535	83.6767	3.71145	nucleus
YMR049C	ERB1	Constituent of 66S pre-ribosomal particles; forms a complex with Nop7p and Ytm1p that is required for maturation of the large ribosomal subunit; required for maturation of the 25S and 5.8S ribosomal RNAs; homologous to mammalian Bop1	I	8.20485	7.93939	7.68132	7.39434	6.85761	5.79724	4.05021	1.44318	UGUAUAAUAA		II	I	44473	571	67522	496	16608	14	3	-0.138	153.02	6.78716	nucleolus,nucleus
YBR189W	RPS9B	Protein component of the small (40S) ribosomal subunit; homologous to mammalian ribosomal protein S9 and bacterial S4; RPS9B has a paralog, RPS9A, that arose from the whole genome duplication	I	8.8526	8.05049	7.2674	6.58821	5.71969	4.20008	2.65455	0.977395	UGUAUAAUAA		II	I	44473	30	67522	589	16608	10	2	NA	2283.2	101.271	cytoplasm
YBR143C	SUP45	Polypeptide release factor (eRF1) in translation termination; mutant form acts as a recessive omnipotent suppressor; methylated by Mtq2p-Trm112p in ternary complex eRF1-eRF3-GTP; mutation of methylation site confers resistance to zymocin; has a role in cytokinesis through interaction with Mlc1p	I	7.8863	7.52155	7.10649	6.61075	5.86099	4.37703	2.42783	1.02871	UGUACAAUAU		III	I	5820	1222	9680	316	1189	49	5	NA	435.249	19.3053	cytoplasm
YDR496C	PUF6	Pumilio-homology domain protein; binds the 3' UTR of ASH1 mRNA and represses its translation, resulting in proper asymmetric localization of ASH1 mRNA; required at post-transcriptional step for efficient retrotransposition; absence results in decreased Ty1 Gag:GFP protein levels; co-sediments with the 60S ribosomal subunit and is required for its biogenesis	I	10.2285	10.0191	9.79828	9.50591	9.03306	8.05537	6.41212	4.63464	UGUACAAUAA		II	I	5820	133	9680	1311	2141	86	4	-0.082	226.029	10.0254	nucleolus,nucleus
YDL031W	DBP1	Putative ATP-dependent RNA helicase of the DEAD-box protein family; constituent of 66S pre-ribosomal particles; essential protein involved in ribosome biogenesis	I	9.01074	8.7989	8.57374	8.26765	7.84013	7.05899	5.87058	4.17155	UGUACCAUAG		IV	I	2565	282	3660	219	257	10	7	-0.346	109.935	4.87611	NA
YDR060W	MAK21	Constituent of 66S pre-ribosomal particles; required for large (60S) ribosomal subunit biogenesis; acts as part of a Mak21p-Noc2p-Rrp5p module that associates with nascent pre-rRNA during transcription and has a role in bigenesis of the large ribosomal subunit; involved in nuclear export of pre-ribosomes; required for maintenance of dsRNA virus; homolog of human CAATT-binding protein	I	8.99908	8.63281	8.26128	7.65331	6.75633	5.47682	3.56894	1.98103	UGUACAAUAA	IV	II	I	5820	31	9680	159	2141	1	5	0.157	183.336	8.13179	nucleolus
YPL043W	NOP4	Nucleolar protein; essential for processing and maturation of 27S pre-rRNA and large ribosomal subunit biogenesis; constituent of 66S pre-ribosomal particles; contains four RNA recognition motifs (RRMs)	I	8.36377	8.03065	7.65465	7.16974	6.4093	5.17008	3.09212	1.20031	UGUACAUUAU		III	I	3248	918	5067	4826	627	82	5	-0.664	112.247	4.97866	nucleolus,nucleus
YCR075W-A		Putative protein of unknown function; identified by homology to Ashbya gossypii; YCR075W-A has a paralog, YNR034W-A, that arose from the whole genome duplication	I	8.65575	8.29262	7.98645	7.59314	6.95856	5.7472	3.97292	2.01459	UGUAUACUAU			I	7713	76	10458	72	1642	2	0	-1.293	51.7693	2.29621	NA
YBR121C	GRS1	Cytoplasmic and mitochondrial glycyl-tRNA synthase; ligates glycine to the cognate anticodon-bearing tRNA; transcription termination factor that may interact with the 3'-end of pre-mRNA to promote 3'-end formation; GRS1 has a paralog, GRS2, that arose from the whole genome duplication; human homolog GARS implicated in Charcot-Marie-Tooth disease, can complement yeast null mutant	I	8.53429	7.90924	7.37619	6.79234	5.83807	4.21892	2.08244	0.110047	UGUAAAUUAA	II	II	I	47241	25	83390	57	16322	1	8	NA	560.114	24.8437	cytoplasm
YML022W	APT1	Adenine phosphoribosyltransferase; catalyzes the formation of AMP from adenine and 5-phosphoribosylpyrophosphate; involved in the salvage pathway of purine nucleotide biosynthesis; APT1 has a paralog, APT2, that arose from the whole genome duplication	I	8.69731	8.26648	7.81063	7.26117	6.41778	5.18829	3.64558	1.70655	UGUAUAAUAU		I	I	44473	6970	67522	222	9264	46	7	NA	303.576	13.465	cytoplasm,nucleus
YNL301C	RPL18B	Ribosomal 60S subunit protein L18B; homologous to mammalian ribosomal protein L18, no bacterial homolog; RPL18B has a paralog, RPL18A, that arose from the whole genome duplication	I	10.117	9.89331	9.6437	9.30643	8.75821	7.72211	6.10754	4.38751	UGUAUAAUAA	III	I	I	44473	338	67522	6633	16608	847	7	NA	163.203	7.23879	cytoplasm
YAR007C	RFA1	Subunit of heterotrimeric Replication Protein A (RPA); RPA is a highly conserved single-stranded DNA binding protein involved in DNA replication, repair, and recombination; RPA protects against inappropriate telomere recombination, and upon telomere uncapping, prevents cell proliferation by a checkpoint-independent pathway; role in DNA catenation/decatenation pathway of chromosome disentangling; …	I	8.10647	7.62503	7.1845	6.63129	5.75543	4.50975	3.21214	2.02167	UGUAACAUAU		III	I	21980	267	26038	3326	5496	1781	10	0.163	59.4163	2.63539	nucleus
YBR252W	DUT1	deoxyuridine triphosphate diphosphatase (dUTPase); catalyzes hydrolysis of dUTP to dUMP and PPi, thereby preventing incorporation of uracil into DNA during replication; critical for the maintenance of genetic stability; also has diphosphatase activity on deoxyinosine triphosphate	I	8.75856	8.4222	8.10931	7.58284	6.78329	5.48564	2.88073	1.55571	UGUAUAAUAA	IV	II	I	44473	178	67522	446	16608	52	6	NA	143.591	6.36892	cytoplasm,nucleus
YNL110C	NOP15	Constituent of 66S pre-ribosomal particles; involved in 60S ribosomal subunit biogenesis; localizes to both nucleolus and cytoplasm	I	8.48208	8.14146	7.81499	7.30075	6.36731	5.06122	2.96579	0.809584	UGUAAGAUAG		I	I	5346	8	9878	3565	1083	186	6	-0.741	168.558	7.47633	nucleolus,nucleus
YNL002C	RLP7	Nucleolar protein similar to large ribosomal subunit L7 proteins; constituent of 66S pre-ribosomal particles; plays an essential role in processing of precursors to the large ribosomal subunit RNAs; binds junction of ITS2 and ITS2-proximal stem between the 3' end of 5.8S rRNA and the 5' end of 25S rRNA	I	7.60389	7.29754	6.99437	6.51492	5.90358	5.0042	3.23908	0.903835	UGUAUAGUAC		II	I	3732	25	5569	732	148	75	5	NA	232.56	10.3151	NA
YOR294W	RRS1	Essential protein that binds ribosomal protein L11; required for nuclear export of the 60S pre-ribosomal subunit during ribosome biogenesis; localizes to the nucleolus and in foci along nuclear periphery; cooperates with Ebp2p and Mps3p to mediate telomere clustering by binding Sir4p, but is not involved in telomere tethering; mouse homolog shows altered expression in Huntington's disease model m…	I	8.13964	8.02342	7.8523	7.60532	7.24417	6.73696	5.87372	4.8014	UGUAAAUUAG		II	I	47241	129	83390	965	13498	65	5	-1.014	277.874	12.325	NA
YGR159C	NSR1	Nucleolar protein that binds nuclear localization sequences; required for pre-rRNA processing and ribosome biogenesis	I	10.2801	9.82541	9.11706	8.19644	7.03788	5.49965	3.53542	1.9233	UGUACAUUAG		III	I	3248	41	5067	2485	663	25	7	NA	868.472	38.5208	nucleolus
YNL067W	RPL9B	Ribosomal 60S subunit protein L9B; homologous to mammalian ribosomal protein L9 and bacterial L6; RPL9B has a paralog, RPL9A, that arose from a single-locus duplication	I	9.21586	8.94023	8.55875	8.04426	7.3145	6.10576	4.67411	3.31037	UGUACAUUAU		III	I	3248	1753	5067	390	627	12	5	NA	728.277	32.3025	cytoplasm
YPL081W	RPS9A	Protein component of the small (40S) ribosomal subunit; homologous to mammalian ribosomal protein S9 and bacterial S4; RPS9A has a paralog, RPS9B, that arose from the whole genome duplication	I	6.03832	5.53851	5.00364	4.23922	3.64814	1.6006	-0.822063	-2.2815	UGUAAAAUAG		I	I	62281	464	107890	543	17519	25	2	0.389	168.582	7.47741	cytoplasm
YAL035W	FUN12	Translation initiation factor eIF5B; GTPase that promotes Met-tRNAiMet binding to ribosomes and ribosomal subunit joining; promotes GTP-dependent maturation of 18S rRNA by Nob1p; protein abundance increases in response to DNA replication stress; homolog of bacterial IF2	I	7.11035	6.31467	5.55605	4.72732	3.64851	2.24287	1.07526	-2.84914	UGUAUAUAAA	IV	III	I	5022	18	11790	41	1839	1	9	NA	302.965	13.4379	cytoplasm
YDR339C	FCF1	Putative PINc domain nuclease; required for early cleavages of 35S pre-rRNA and maturation of 18S rRNA; component of the SSU (small subunit) processome involved in 40S ribosomal subunit biogenesis; copurifies with Faf1p	I	6.91767	6.54413	6.19779	5.7683	5.04292	3.79569	2.25396	0.60559	UGUAUAUUAA			I	39923	38	61608	418	16718	9	7	-0.597	140.926	6.25074	NA
YOL021C	DIS3	Exosome core complex catalytic subunit; has both endonuclease and 3'-5' exonuclease activity; involved in 3'-5' RNA processing and degradation in both the nucleus and the cytoplasm; role in degradation of tRNAs; has similarity to E. coli RNase R and to human DIS3; mutations in Dis3p corresponding to human mutations implicated in multiple myeloma cause phenotypes suggesting impaired exosome functi…	I	6.77363	6.24986	5.60823	5.05384	4.1808	2.5392	0.809584	-0.570373	UGUAUAAUAU	III	III	I	44473	1846	67522	2286	9264	164	9	-0.291	84.3615	3.74183	cytoplasm,nucleolus,nucleus
YNL141W	AAH1	Adenine deaminase (adenine aminohydrolase); converts adenine to hypoxanthine; involved in purine salvage; transcriptionally regulated by nutrient levels and growth phase; Aah1p degraded upon entry into quiescence via SCF and the proteasome	I	7.09395	6.52604	5.84875	4.95624	3.70141	2.19037	1.33255	0.973324	UGUAUAAUAU		II	I	44473	4	67522	3405	9264	375	6	NA	221.819	9.83873	cytoplasm,nucleus
YLR222C	UTP13	Nucleolar protein; component of the small subunit (SSU) processome containing the U3 snoRNA that is involved in processing of pre-18S rRNA	I	5.53831	5.20099	4.8784	4.15193	3.39787	2.05927	0.440231	-0.63829	UGUAAACUAG			I	30088	13	46976	49	7231	1	6	-0.217	129.578	5.74738	nucleolus
YJR109C	CPA2	Large subunit of carbamoyl phosphate synthetase; carbamoyl phosphate synthetase catalyzes a step in the synthesis of citrulline, an arginine precursor	I	6.71068	6.33491	5.87806	5.15579	4.25157	3.00596	1.4015	0.130598	UGUAUAUUAU		III	I	39923	765	61608	480	7219	48	6	-0.956	66.6944	2.95821	cytoplasm
YGR211W	ZPR1	Essential protein with two zinc fingers; present in the nucleus of growing cells but relocates to the cytoplasm in starved cells via a process mediated by Cpr1p; binds to translation elongation factor eEF-1 (Tef1p); relative distribution to the nucleus increases upon DNA replication stress	I	5.43791	4.96168	4.58403	3.97491	2.94585	1.79265	0.766625	-0.49537	UGUAUAAUAG		IV	I	44473	6	67522	24	12843	0	6	NA	183.926	8.15797	cytoplasm,nucleus
YNL132W	KRE33	Protein required for biogenesis of the small ribosomal subunit; heterozygous mutant shows haploinsufficiency in K1 killer toxin resistance; essential gene; NAT10, the human homolog, implicated in several types of cancer and premature aging.	I	7.38448	6.85814	6.39286	5.64091	4.65982	2.94306	0.753434	-0.291257	UGUACAAUAA		III	I	5820	4	9680	190	2141	9	7	-0.516	165.473	7.33951	nucleolus
YPR143W	RRP15	Nucleolar protein; constituent of pre-60S ribosomal particles; required for proper processing of the 27S pre-rRNA at the A3 and B1 sites to yield mature 5.8S and 25S rRNAs	I	4.91464	4.6753	4.42732	4.04611	3.28768	2.04524	0.296967	-0.684963	UGUAUAUUAU			I	39923	726	61608	125	7219	6	5	-0.891	111.799	4.9588	nucleolus,nucleus
YLR401C	DUS3	Dihydrouridine synthase; member of a widespread family of conserved proteins including Smm1p, Dus1p, and Dus4p; contains a consensus oleate response element (ORE) in its promoter region; forms nuclear foci upon DNA replication stress	I	7.00448	6.48714	5.94273	5.39281	4.22907	2.44287	0.895703	-1.21149	UGUAUCAUAA		II	I	3621	150	4458	38	1759	6	5	-0.11	77.7352	3.44792	cytoplasm,nucleus
YIL069C	RPS24B	Protein component of the small (40S) ribosomal subunit; homologous to mammalian ribosomal protein S24, no bacterial homolog; RPS24B has a paralog, RPS24A, that arose from the whole genome duplication	I	6.90241	6.35743	5.8571	5.26007	4.44639	2.71896	0.629493	-0.809447	UGUAUUAAGA	III	I	I	115	34	1713	148	65	31	5	NA	495.88	21.9946	cytoplasm
YMR229C	RRP5	RNA binding protein involved in synthesis of both 18S and 5.8S rRNAs; component of both the ribosomal small subunit (SSU) processosome and the 90S preribosome; acts as part of a Mak21p-Noc2p-Rrp5p module that associates with nascent pre-rRNA during transcription and has a role in bigenesis of the large ribosomal subunit; has binding preference for single stranded tracts of U's; relocalizes from n…	I	7.65228	7.08325	6.47534	5.76252	4.97849	3.4472	1.78203	-0.246069	UGUAAAGUAU		III	I	8553	1710	13151	571	1848	47	11	-1.295	303.005	13.4397	nucleolus
YLR009W	RLP24	Essential protein required for ribosomal large subunit biogenesis; associated with pre-60S ribosomal subunits; stimulates the ATPase activity of Afg2p, which is required for release of Rlp24p from the pre-60S particle; has similarity to Rpl24Ap and Rpl24Bp	I	7.07333	6.57346	6.14037	5.34692	4.30497	1.73582	-0.365342	-2.69653	UGUAUACUAU	IV	II	I	7713	938	10458	757	1642	21	9	NA	336.54	14.9271	NA
YDR224C	HTB1	Histone H2B; core histone protein required for chromatin assembly and chromosome function; nearly identical to HTB2; Rad6p-Bre1p-Lge1p mediated ubiquitination regulates reassembly after DNA replication, transcriptional activation, meiotic DSB formation and H3 methylation	I	5.41125	5.14234	4.85372	4.44023	3.91254	3.13732	2.14239	1.09631	UGUAUAAUAG		I	I	44473	328	67522	477	12843	11	8	NA	1196.48	53.0695	nucleus
YBR010W	HHT1	Histone H3; core histone protein required for chromatin assembly, part of heterochromatin-mediated telomeric and HM silencing; one of two identical histone H3 proteins (see HHT2); regulated by acetylation, methylation, and phosphorylation; H3K14 acetylation plays an important role in the unfolding of strongly positioned nucleosomes during repair of UV damage	I	5.32345	4.97708	4.68705	4.262	3.79086	2.80946	1.62226	0.19682	UGUAUAAUAG		I	I	44473	31	67522	566	12843	211	8	NA	1023.51	45.3975	nucleus
YBR267W	REI1	Cytoplasmic pre-60S factor; required for the correct recycling of shuttling factors Alb1, Arx1 and Tif6 at the end of the ribosomal large subunit biogenesis; involved in bud growth in the mitotic signaling network	I	6.21242	5.95926	5.67254	5.23387	4.72982	3.72729	2.5595	0.851301	UGUACAUUAG			I	3248	1527	5067	682	663	298	6	-0.539	97.6065	4.32931	cytoplasm
YJR063W	RPA12	RNA polymerase I subunit A12.2; contains two zinc binding domains, and the N terminal domain is responsible for anchoring to the RNA pol I complex	I	6.65978	6.27808	5.74732	5.02051	4.04113	2.55205	-0.570373	0	UGUACAUUAA			I	3248	116	5067	972	1318	36	3	-0.982	202.857	8.99767	nucleolus
YKR035W-A	DID2	Class E protein of the vacuolar protein-sorting (Vps) pathway; binds Vps4p and directs it to dissociate ESCRT-III complexes; forms a functional and physical complex with Ist1p; human ortholog may be altered in breast tumors	I	5.09244	4.71386	4.06472	3.61009	2.85416	2.1639	1.34985	0.308588	UGUAUACUAA		III	I	7713	4	10458	261	3109	12	4	-0.86	74.9988	3.32655	endosome
YAL021C	CCR4	Component of the CCR4-NOT transcriptional complex; CCR4-NOT is involved in regulation of gene expression; component of the major cytoplasmic deadenylase, which is involved in mRNA poly(A) tail shortening	I	4.91508	4.67411	4.3436	4.00423	3.41204	2.42383	0.595585	-0.758641	UGUACACUAC			I	929	38	1308	38	96	1	8	0.414	66.6398	2.95579	cytoplasm
YER006W	NUG1	GTPase that associates with nuclear 60S pre-ribosomes; required for export of 60S ribosomal subunits from the nucleus	I	6.64206	6.18711	5.52654	4.71072	3.73174	2.19351	-0.49537	-1.77082	UGUAAAUUAU			I	47241	203	83390	280	9997	25	4	0.065	246.63	10.9392	nucleolus,nucleus
YAL059W	ECM1	Pre-ribosomal factor involved in 60S ribosomal protein subunit export; associates with the pre-60S particle; shuttles between the nucleus and cytoplasm	I	5.44255	5.21952	4.96178	4.61482	3.85995	2.90361	1.70409	0.320786	UGUACAUUAG			I	3248	32	5067	59	663	1	4	-1.567	131.502	5.83271	nucleus
YMR146C	TIF34	eIF3i subunit of the eukaryotic translation initiation factor 3 (eIF3); subunit of the core complex of eIF3; essential for translation; stimulates rate of ribosomal scanning during translation reinitiation	I	5.49376	5.04379	4.42761	3.74626	2.96098	1.56841	0.241359	-0.709563	UGUAUAGUAA	IV		I	3732	4	5569	262	1514	13	4	NA	440.904	19.5562	NA
YKL007W	CAP1	Alpha subunit of the capping protein heterodimer (Cap1p and Cap2p); capping protein (CP) binds to the barbed ends of actin filaments preventing further polymerization; localized predominantly to cortical actin patches; protein increases in abundance and relocalizes from bud neck to plasma membrane upon DNA replication stress	I	5.98367	5.55342	5.11164	4.60473	3.81061	2.65327	1.32651	-1.67349	UGUACAUUAU			I	3248	11	5067	50	627	1	6	-0.339	88.0068	3.90351	actin
YJL158C	CIS3	Mannose-containing glycoprotein constituent of the cell wall; member of the PIR (proteins with internal repeats) family	I	6.1365	5.29929	4.64651	3.91503	3.13569	2.1591	-0.291257	-1.51692	UGUAUAUUAC		II	I	39923	396	61608	197	1713	8	0	NA	640.822	28.4235	vacuole
YGL097W	SRM1	Nucleotide exchange factor for Gsp1p; localizes to the nucleus, required for nucleocytoplasmic trafficking of macromolecules; suppressor of the pheromone response pathway; potentially phosphorylated by Cdc28p	I	6.77033	6.40831	6.09136	5.65311	4.90047	3.72687	1.90575	-1.67349	UGUAAAAUAU		I	I	62281	1027	107890	1146	13320	119	6	-0.413	106.002	4.70169	nucleus
YOL077C	BRX1	Nucleolar protein; constituent of 66S pre-ribosomal particles; depletion leads to defects in rRNA processing and a block in the assembly of large ribosomal subunits; possesses a sigma(70)-like RNA-binding motif	I	5.61142	5.25582	4.84634	4.35806	3.71889	2.19682	-0.327824	0	UGUAUAUUAA		IV	I	39923	8	61608	34	16718	0	5	NA	314.827	13.964	nucleolus,nucleus
YDL014W	NOP1	Histone glutamine methyltransferase, modifies H2A at Q105 in nucleolus; component of the small subunit processome complex, which is required for processing of pre-18S rRNA; ortholog of mammalian fibrillarin	I	7.80347	7.28229	6.71638	5.98727	4.9794	3.05055	1.20653	-0.527211	UGUAAAAUAG		II	I	62281	88	107890	215	17519	4	3	NA	628.804	27.8904	NA
YDR156W	RPA14	RNA polymerase I subunit A14	I	6.90701	6.34344	5.72836	4.95649	4.01605	2.70874	0.950386	-0.120244	UGUAUACUAC		III	I	7713	86	10458	261	293	11	1	-1.023	86.0163	3.81523	nucleolus
YLR175W	CBF5	Pseudouridine synthase catalytic subunit of box H/ACA snoRNPs; acts on large and small rRNAs, on snRNA U2, and on some mRNAs; mutations in human ortholog dyskerin cause the disorder dyskeratosis congenita; small nucleolar ribonucleoprotein particles are also known as snoRNPs	I	6.41511	6.10561	5.78188	5.34953	4.82032	3.87062	2.72005	1.19994	UGUAUAUUAA	IV	II	I	39923	8	61608	107	16718	1	4	NA	373.744	16.5773	nucleolus
YPL146C	NOP53	Nucleolar protein; involved in biogenesis of the 60S subunit of the ribosome; interacts with rRNA processing factors Cbf5p and Nop2p and with the nucleolar proteins Nop17p and Nip7p; null mutant is viable but growth is severely impaired	I	5.4678	5.13223	4.7825	4.18292	3.62885	2.14906	0.676667	-0.849139	UGUAUAGUAG		III	I	3732	26	5569	32	872	3	5	-0.345	111.782	4.95806	nucleus
YLR186W	EMG1	Methyltransferase for rRNA; catalyzes methylation of the pseudouridine residue 1191 of 18S rRNA; member of the SPOUT methyltransferase family; required for maturation of 18S rRNA and for 40S ribosomal subunit production independently of methyltransferase activity; forms homodimers; human ortholog is mutated in Bowen-Conradi syndrome, and the equivalent mutation in yeast affects Emg1p dimerization…	I	8.03122	7.6239	7.2524	6.74197	5.62088	3.74532	1.19682	-2.69653	UGUAUAAUAA		II	I	44473	4776	67522	543	16608	46	6	-0.564	174.309	7.73141	cytoplasm,nucleus
YBL004W	UTP2	Component of the small-subunit (SSU) processome; SSU processome is involved in the biogenesis of the 18S rRNA	I	7.2476	6.68586	6.05135	5.37699	3.92683	2.20808	1.01418	-3.51692	UGUAUACUAA		II	I	7713	6	10458	95	3109	8	12	-0.391	145.368	6.44775	cytoplasm,nucleolus
YHR052W	CIC1	Essential protein that interacts with proteasome components; has a potential role in proteasome substrate specificity; also copurifies with 66S pre-ribosomal particles	I	4.98768	4.72711	4.49821	4.17808	3.64143	2.54181	1.19682	-0.356138	UGUAUAUUAA			I	39923	3	61608	272	16718	10	8	-0.372	232.305	10.3038	nucleolus,nucleus
YMR290C	HAS1	ATP-dependent RNA helicase; involved in the biogenesis of 40S and 60S ribosome subunits; localizes to both the nuclear periphery and nucleolus; highly enriched in nuclear pore complex fractions; constituent of 66S pre-ribosomal particles	I	7.62756	7.0684	6.53686	5.94947	4.99737	3.83887	1.78619	-0.072482	UGUAAACUAU	IV	II	I	30088	156	46976	208	6927	4	10	-0.163	251.524	11.1563	NA
YHR089C	GAR1	Protein component of the H/ACA snoRNP pseudouridylase complex; involved in the modification and cleavage of the 18S pre-rRNA	I	5.98165	5.75973	5.50765	4.95359	4.2527	3.24523	1.53025	-0.758641	UGUAUACUAU		IV	I	7713	7	10458	2456	1642	2015	5	NA	246.187	10.9196	nucleolus
YNL308C	KRI1	Essential nucleolar protein required for 40S ribosome biogenesis; associate with snR30; physically and functionally interacts with Krr1p	I	5.86893	5.43613	5.16835	4.60128	3.80199	2.44155	1.08583	-1.51692	UGUAUAUUAC			I	39923	210	61608	336	1713	25	9	-0.474	40.3479	1.78962	cytoplasm,nucleolus
YDL213C	NOP6	rRNA-binding protein required for 40S ribosomal subunit biogenesis; contains an RNA recognition motif (RRM); hydrophilin essential to overcome the stress of the desiccation-rehydration process; NOP6 may be a fungal-specific gene as no homologs have been yet identified in higher eukaryotes	I	6.20677	5.60141	5.18628	4.68795	3.96201	2.3147	1.46182	0.830358	UGUAUCUUAG	IV	II	I	461	716	987	1367	91	123	5	-0.186	107.817	4.78221	nucleolus
YBR247C	ENP1	Protein associated with U3 and U14 snoRNAs; required for pre-rRNA processing and 40S ribosomal subunit synthesis; localized in the nucleus and concentrated in the nucleolus	I	5.69393	5.42377	5.15865	4.80231	3.96333	2.48992	0.19682	0	UGUAUAAUAA		IV	I	44473	10	67522	45	16608	0	6	-0.229	129.123	5.72723	cytoplasm,nucleolus,nucleus
YNL031C	HHT2	Histone H3; core histone protein required for chromatin assembly, part of heterochromatin-mediated telomeric and HM silencing; one of two identical histone H3 proteins (see HHT1); regulated by acetylation, methylation, and phosphorylation; H3K14 acetylation plays an important role in the unfolding of strongly positioned nucleosomes during repair of UV damage	I	6.99377	6.66553	6.23102	5.6626	4.65419	3.20402	1.78594	-0.264176	UGUAUAAUAA	IV	I	I	44473	13	67522	227	16608	10	8	NA	1010.32	44.8124	ambiguous
YPR187W	RPO26	RNA polymerase subunit ABC23; common to RNA polymerases I, II, and III; part of central core; similar to bacterial omega subunit	I	6.48552	5.93991	5.45083	4.99044	3.97657	2.35002	0.61498	-0.945695	UGUAUAUUAU	IV	II	I	39923	20	61608	107	7219	0	9	NA	282.26	12.5195	cytoplasm,nucleus
YGL099W	LSG1	Putative GTPase involved in 60S ribosomal subunit biogenesis; required for the release of Nmd3p from 60S subunits in the cytoplasm	I	7.75393	7.215	6.53303	5.68264	4.75403	3.03721	0.054305	-1.95957	UGUGUACUAU			I	229	29	374	2311	149	727	5	0.024	116.239	5.15574	cytoplasm
YLR196W	PWP1	Protein with WD-40 repeats involved in rRNA processing; associates with trans-acting ribosome biogenesis factors; similar to beta-transducin superfamily	I	6.84488	6.36604	5.80165	5.38044	4.62135	3.69722	2.46312	1.14725	UGUAUACUAG		IV	I	7713	101	10458	4663	1930	610	3	-0.488	176.446	7.82622	cytoplasm,nucleolus,nucleus
YCR047C	BUD23	Methyltransferase that methylates residue G1575 of 18S rRNA; required for rRNA processing and nuclear export of 40S ribosomal subunits independently of methylation activity; diploid mutant displays random budding pattern; functional homolog of human WBSCR22	I	5.44049	4.9541	4.57986	4.02706	3.52125	2.06995	1.13713	-1.03442	UGUAUACUAU			I	7713	8	10458	38	1642	0	3	-0.536	51.2433	2.27288	cytoplasm,nucleus
YHR201C	PPX1	Exopolyphosphatase; hydrolyzes inorganic polyphosphate (poly P) into Pi residues; located in the cytosol, plasma membrane, and mitochondrial matrix	I	5.24986	4.81515	4.30622	3.69803	2.80537	2.06139	0.969669	-1.00368	UGUACACUAC			I	929	592	1308	1489	96	37	4	-0.29	53.2297	2.36099	cytoplasm,nucleus
YKR024C	DBP7	Putative ATP-dependent RNA helicase of the DEAD-box family; involved in ribosomal biogenesis; required at post-transcriptional step for efficient retrotransposition; essential for growth under anaerobic conditions	I	6.39494	6.14986	5.96291	5.70438	5.30743	4.5443	3.44968	1.87953	UGUAUACUAU			I	7713	35	10458	43	1642	0	2	0.169	56.0638	2.48669	nucleolus,nucleus
YGL078C	DBP3	RNA-Dependent ATPase, member of DExD/H-box family; involved in cleavage of site A3 within the ITS1 spacer during rRNA processing; not essential for growth, but deletion causes severe slow-growth phenotype	I	6.18665	5.86554	5.57689	5.10797	4.52804	3.64444	2.21291	0.950386	UGUAUAUUAC			I	39923	305	61608	1245	1713	80	6	-0.642	209.832	9.30703	nucleolus,nucleus
YML123C	PHO84	High-affinity inorganic phosphate (Pi) transporter; also low-affinity manganese transporter; regulated by Pho4p and Spt7p; mutation confers resistance to arsenate; exit from the ER during maturation requires Pho86p; cells overexpressing Pho84p accumulate heavy metals but do not develop symptoms of metal toxicity	I	6.5221	5.96054	5.38012	4.90777	4.27249	3.0335	0.412945	-1.45436	UGUAAACUAG		I	I	30088	73	46976	75	7231	10	6	NA	984.422	43.6637	NA
YLL011W	SOF1	Protein required for biogenesis of 40S (small) ribosomal subunit; has similarity to the beta subunit of trimeric G-proteins and the splicing factor Prp4p; essential gene	I	6.30938	5.47962	4.93465	4.29269	3.29078	2.34438	0.871945	-1.21149	UGUACAAUAU	III	II	I	5820	191	9680	2541	1189	866	6	-0.237	112.164	4.975	nucleolus
YOR103C	OST2	Epsilon subunit of the oligosaccharyltransferase complex; located in the ER lumen; catalyzes asparagine-linked glycosylation of newly synthesized proteins	I	6.35626	5.67675	5.15774	4.40222	3.69341	2.68933	1.22882	-1.84914	UGUACAUUAU		II	I	3248	9	5067	101	627	173	3	-0.188	125.825	5.58093	NA
YBR034C	HMT1	Nuclear SAM-dependent mono- and asymmetric methyltransferase; modifies hnRNPs, including Npl3p and Hrp1p, affecting their activity and nuclear export; methylates U1 snRNP protein Snp1p, ribosomal protein Rps2p, and histones H3 and H4; interacts genetically with genes encoding components of Rpd3(L) and this interaction is important for Rpd3 recruitment to the subtelomeric region.	I	7.55872	7.15555	6.62082	6.11835	5.38915	3.80748	2.31775	1.05045	UGUACUAUAG	III	I	I	2809	279	4693	27	587	0	7	-0.112	287.154	12.7366	cytoplasm,nucleus
YGR103W	NOP7	Component of several different pre-ribosomal particles; forms a complex with Ytm1p and Erb1p that is required for maturation of the large ribosomal subunit; required for exit from G<sub>0</sub> and the initiation of cell proliferation	I	7.91011	7.33163	6.85198	5.85281	4.59762	2.83875	0.344219	-1.26418	UGUACAUUAA	IV	III	I	3248	682	5067	3162	1318	257	8	-0.236	414.371	18.3793	nucleolus,nucleus
YLR388W	RPS29A	Protein component of the small (40S) ribosomal subunit; homologous to mammalian ribosomal protein S29 and bacterial S14; RPS29A has a paralog, RPS29B, that arose from the whole genome duplication	II	4.5202	3.95224	3.59049	3.2079	1.94459	1.12365	-1.67349	-2.84914	UGUAUACAUA		II	II	28	6	301	25	10	0	5	NA	1995.99	88.5313	cytoplasm
YNL268W	LYP1	Lysine permease; one of three amino acid permeases (Alp1p, Can1p, Lyp1p) responsible for uptake of cationic amino acids	II	4.96421	4.40652	3.64978	3.11107	1.87586	-0.02625	-2.2815	0	UGUAUAAUAU	IV	III	II	44473	14	67522	154	9264	8	3	0.336	100.435	4.45477	cell periphery,vacuole
YNR046W	TRM112	Protein involved in methylation of tRNA, rRNA, and translation factors; also involved in ribosome biogenesis; subunit of tRNA methyltransferase (MTase) complexes in combination with Trm9p and Trm11p; N7-methylates G1575 of 18S rRNA as complex with Bud23p; subunit of complex with Mtq2p that methylates Sup45p (eRF1) in the ternary complex eRF1-eRF3-GTP; relative distribution to the nucleus increase…	II	4.2806	3.75024	2.98103	2.50841	1.48338	-0.673487	-2.51692	0	UGUAGCAUAA		II	II	744	166	1026	418	250	8	3	-0.579	164.296	7.28727	cytoplasm,nucleus
YGR061C	ADE6	Formylglycinamidine-ribonucleotide (FGAM)-synthetase; catalyzes a step in the 'de novo' purine nucleotide biosynthetic pathway	II	4.83135	4.01245	3.40851	2.75012	2.02871	0.326513	-2.69653	-3.2815	UGUAUAUGUA		IV	I	959	4	1686	317	835	38	10	NA	241.986	10.7332	cytoplasm
YPR133C	SPN1	Protein involved in RNA polymerase II transcription; is constitutively recruited to the CYC1 promoter and is required for recruitment of chromatin remodeling factors for the expression of CYC1 gene; interacts genetically or physically with RNAP II, TBP, TFIIS, and chromatin remodelling factors; central domain highly conserved throughout eukaryotes; mutations confer an Spt- phenotype	II	4.38401	4.04751	3.61941	3.19134	2.57472	0.855268	-0.721332	-1.09617	UGUAUCAUAU		IV	I	3621	200	4458	1060	843	737	6	-0.347	80.7313	3.58081	NA
YPL266W	DIM1	Essential 18S rRNA dimethylase (dimethyladenosine transferase); responsible for conserved m6(2)Am6(2)A dimethylation in 3'-terminal loop of 18S rRNA, part of 90S and 40S pre-particles in nucleolus, involved in pre-ribosomal RNA processing; functional homolog of human DIMT1L	II	6.08374	5.31236	4.62888	3.7351	2.59174	1.59293	0.308588	-2.51692	UGUAUACUAU			I	7713	21260	10458	1240	1642	62	5	-0.427	155.159	6.88201	NA
YGR130C		Component of the eisosome with unknown function; GFP-fusion protein localizes to the cytoplasm; specifically phosphorylated in vitro by mammalian diphosphoinositol pentakisphosphate (IP7)	II	4.60898	4.00829	3.43065	2.81899	2.01417	0.667144	-0.318856	-1.31886	UGUACCAAUA		II	II	269	246	599	125	50	9	4	-0.01	36.3862	1.6139	punctate composite
YPL190C	NAB3	RNA-binding protein, subunit of Nrd1 complex (Nrd1p-Nab3p-Sen1p); complex interacts with exosome to mediate 3'-end formation of some mRNAs, snRNAs, snoRNAs, and CUTs; required for termination of non-poly(A) transcripts and efficient splicing; Nrd1-Nab3 pathway appears to have a role in rapid suppression of some genes when cells are shifted to poor growth conditions, indicating role for Nrd1-Nab3 …	II	4.45802	3.85291	3.42391	2.73234	2.06462	0.545636	-0.709563	0	UGUACAUUAU	III		II	3248	464	5067	846	627	8	2	0.724	78.5244	3.48293	nucleus
YDR101C	ARX1	Nuclear export factor for the ribosomal pre-60S subunit; shuttling factor which directly binds FG rich nucleoporins and facilities translocation through the nuclear pore complex; interacts directly with Alb1p; responsible for Tif6p recycling defects in the absence of Rei1; associated with the ribosomal export complex	II	3.7172	3.56011	3.35797	3.06558	2.58565	1.71093	-0.041784	-1.14473	UGUAAAAUAG		III	I	62281	151	107890	78	17519	0	4	-0.139	237.791	10.5471	nucleus
YLR298C	YHC1	Component of the U1 snRNP complex required for pre-mRNA splicing; putative ortholog of human U1C protein, which is involved in formation of a complex between U1 snRNP and the pre-mRNA 5' splice site	II	3.61381	3.48793	3.04958	2.6939	1.87563	-0.211493	-1.60393	-2.51692	UGUAGACUAU			I	2051	959	3341	2463	427	280	3	-0.215	29.9894	1.33017	nucleus
YBL024W	NCL1	S-adenosyl-L-methionine-dependent tRNA: m5C-methyltransferase; methylates cytosine to m5C at several positions in tRNAs and intron-containing pre-tRNAs; increases proportion of tRNALeu(CAA) with m5C at wobble position in response to hydrogen peroxide, causing selective translation of mRNA from genes enriched in TTG codon; loss of NCL1 confers hypersensitivity to oxidative stress; similar to Nop2p…	II	5.15632	4.61195	4.22195	3.61862	2.29663	1.23493	-0.255594	-1.03442	UGUAUAUUAU			I	39923	6	61608	330	7219	40	7	NA	197.434	8.75713	nucleus
YLR380W	CSR1	Phosphatidylinositol transfer protein; has a potential role in regulating lipid and fatty acid metabolism under heme-depleted conditions; interacts specifically with thioredoxin peroxidase; may have a role in oxidative stress resistance; protein abundance increases in response to DNA replication stress	II	4.83025	4.349	3.78399	3.20333	2.57097	1.08959	-0.49537	-3.51692	UGUAUAAUAC			I	44473	212	67522	32	1878	0	6	-0.029	91.2077	4.04549	ambiguous
YMR143W	RPS16A	Protein component of the small (40S) ribosomal subunit; homologous to mammalian ribosomal protein S16 and bacterial S9; RPS16A has a paralog, RPS16B, that arose from the whole genome duplication	II	5.90878	4.84839	4.24918	3.26851	2.02167	0.838865	-0.096165	-1.09617	UAUAAAUUAC		I	I	1079	2515	4309	613	74	21	2	NA	1028.17	45.6043	cytoplasm
YCR093W	CDC39	Component of the CCR4-NOT1 core complex; this complex has multiple roles in regulating mRNA levels including regulation of transcription and destabilizing mRNAs by deadenylation; basal transcription factor	II	4.96586	4.38231	3.92225	3.19664	2.56934	1.34985	-0.255594	-0.709563	UGUAUAAUAC			I	44473	26	67522	195	1878	3	9	-0.273	106.19	4.71003	cytoplasm
YGR266W		Protein of unknown function; predicted to contain a single transmembrane domain; mutant has increased aneuploidy tolerance; localized to both the mitochondrial outer membrane and the plasma membrane; protein abundance increases in response to DNA replication stress	II	4.1636	3.71768	3.34264	2.77724	1.57564	0.842867	-4.28149	-4.28149	UGUAUAUACU			II	508	813	11790	145	201	2	6	-0.075	32.9422	1.46114	ER
YBL027W	RPL19B	Ribosomal 60S subunit protein L19B; rpl19a and rpl19b single null mutations result in slow growth, while the double null mutation is lethal; homologous to mammalian ribosomal protein L19, no bacterial homolog; RPL19B has a paralog, RPL19A, that arose from the whole genome duplication	II	4.28088	3.37245	2.89065	2.1573	1.25679	0.667144	0.585509	-2.51692	UGUAAAAUUG	IV	I	II	5061	4	107890	227	1114	145	2	NA	2218.02	98.3794	cytoplasm
YGL241W	KAP114	Karyopherin, responsible for nuclear import of specific proteins; cargoes include Spt15p, Sua7p, histones H2A and H2B, and Nap1p; amino terminus shows similarity to those of other importins, particularly Cse1p; localization is primarily nuclear; function is regulated by sumoylation; protein abundance increases in response to DNA replication stress	II	5.72316	5.40429	5.18048	4.62856	3.99994	1.33539	-2.51692	0	UGUAAAGUAG			I	8553	35	13151	140	1816	3	6	-0.651	25.8267	1.14553	cytoplasm,nucleus
YLR344W	RPL26A	Ribosomal 60S subunit protein L26A; binds to 5.8S rRNA; non-essential even when paralog is also deleted; deletion has minimal affections on ribosome biosynthesis; homologous to mammalian ribosomal protein L26 and bacterial L24; RPL26A has a paralog, RPL26B, that arose from the whole genome duplication	II	5.99726	5.1913	4.47235	3.29825	2.27849	0.863631	-0.570373	-1.2815	UGUAUACUGG	II	I	II	318	315	10458	207	18	2	4	NA	558.553	24.7744	cytoplasm
YOR224C	RPB8	RNA polymerase subunit ABC14.5; common to RNA polymerases I, II, and III	II	4.60499	4.17225	3.8791	3.37806	2.49517	1.26312	-0.177726	-2.84914	UGUAAAAUAC	IV	I	I	62281	44	107890	11	2859	1	4	NA	401.885	17.8255	nucleus
YCR031C	RPS14A	Protein component of the small (40S) ribosomal subunit; required for ribosome assembly and 20S pre-rRNA processing; mutations confer cryptopleurine resistance; homologous to mammalian ribosomal protein S14 and bacterial S11; RPS14A has a paralog, RPS14B, that arose from the whole genome duplication	II	5.05178	4.25363	3.66741	3.1591	2.20808	0.90766	-0.849139	-2.69653	UGUAAAUUUU	II	I	I	3243	75	83390	192	554	3	7	NA	1879.06	83.3452	NA
YOR206W	NOC2	Protein involved in ribosome biogenesis; forms a nucleolar complex with Mak21p that binds to 90S and 66S pre-ribosomes; forms a nuclear complex with Noc3p that binds to 66S pre-ribosomes; both complexes mediate intranuclear transport of ribosomal precursors; acts as part of a Mak21p-Noc2p-Rrp5p module that associates with nascent pre-rRNA during transcription and has a role in bigenesis of the la…	II	5.01156	4.52167	4.11489	3.70251	3.07176	1.12036	-2.14473	-3.51692	UGUAAAAUAA		II	I	62281	1	107890	50	20999	0	8	-0.041	210.106	9.31918	nucleolus,nucleus
YPL210C	SRP72	Core component of the signal recognition particle (SRP); the SRP is a ribonucleoprotein (RNP) complex that functions in targeting nascent secretory proteins to the endoplasmic reticulum (ER) membrane	II	5.69121	5.2954	4.92037	4.4017	3.49214	1.78411	-1.53758	-2.04918	UGUAUAUGAA	IV	II	I	407	4	1686	86	156	1	8	0.112	101.965	4.52264	ER
YKL182W	FAS1	Beta subunit of fatty acid synthetase; complex catalyzes the synthesis of long-chain saturated fatty acids; contains acetyltransacylase, dehydratase, enoyl reductase, malonyl transacylase, and palmitoyl transacylase activities	II	6.36211	5.3632	4.68739	4.04785	2.81798	1.48338	0.356121	-2.84914	UGUAUACUAA	IV	IV	I	7713	4	10458	212	3109	0	8	NA	698.947	31.0016	cytoplasm
YOL126C	MDH2	Cytoplasmic malate dehydrogenase; one of three isozymes that catalyze interconversion of malate and oxaloacetate; involved in the glyoxylate cycle and gluconeogenesis during growth on two-carbon compounds; interacts with Pck1p and Fbp1	II	4.22055	3.49071	3.22491	2.46746	1.61759	-0.318856	-1.93196	-3.51692	UAUAUUCUAC	II		II	71	195	374	62	17	6	3	-0.498	75.8593	3.36471	peroxisome
YGL103W	RPL28	Ribosomal 60S subunit protein L28; homologous to mammalian ribosomal protein L27A and bacterial L15; may have peptidyl transferase activity; can mutate to cycloheximide resistance	II	5.55695	4.46811	3.62051	2.12896	0.931282	-0.721332	-1.93196	0	UGUAUUAUUU	III	I	I	617	5	7959	61	117	4	9	NA	2217.26	98.3457	NA
YGL070C	RPB9	RNA polymerase II subunit B12.6; contacts DNA; mutations affect transcription start site selection and fidelity of transcription	II	4.38332	3.97496	3.52154	2.58459	1.4888	-1.03442	0	0	UGUAUACUAU		II	II	7713	839	10458	347	1642	12	5	-0.1	89.8106	3.98352	nucleus
YDR399W	HPT1	Dimeric hypoxanthine-guanine phosphoribosyltransferase; catalyzes the transfer of the phosphoribosyl portion of 5-phosphoribosyl-alpha-1-pyrophosphate to a purine base (either guanine or hypoxanthine) to form pyrophosphate and a purine nucleotide (either guanosine monophosphate or inosine monophosphate); mutations in the human homolog HPRT1 can cause Lesch-Nyhan syndrome and Kelley-Seegmiller syn…	II	4.87022	4.50778	3.89833	3.58146	2.47279	0.278668	0	0	UGUACAAUAG		III	I	5820	51	9680	144	1266	5	5	NA	337.196	14.9562	cytoplasm,nucleus
YFR001W	LOC1	Nuclear protein involved in asymmetric localization of ASH1 mRNA; binds double-stranded RNA in vitro; constituent of 66S pre-ribosomal particles; required at post-transcriptional step for efficient retrotransposition; absence results in decreased Ty1 Gag:GFP protein levels; relocalizes from nucleus to cytoplasm upon DNA replication stress	II	4.60252	3.96711	3.39021	2.96568	2.53149	1.23493	-1.19499	-3.51692	UGUAUAAUAU		II	I	44473	4	67522	45	9264	1	4	-0.539	77.313	3.42919	nucleolus,nucleus
YKL009W	MRT4	Protein involved in mRNA turnover and ribosome assembly; required at post-transcriptional step for efficient retrotransposition; localizes to the nucleolus	II	4.04968	3.50448	3.26553	2.89378	2.29825	0.137892	-0.403861	-1.95957	UGUAUAAAAA		II	I	4606	57	10809	44	1102	0	4	NA	299.343	13.2773	nucleolus,nucleus
YBL028C		Protein of unknown function that may interact with ribosomes; green fluorescent protein (GFP)-fusion protein localizes to the nucleolus; predicted to be involved in ribosome biogenesis	II	5.2133	4.62203	3.9949	3.27628	2.53164	1.48594	0.830358	-0.709563	UGUACCAUAC		II	I	2565	38	3660	87	189	1	6	-0.928	236.1	10.4721	nucleolus,nucleus
YGR274C	TAF1	TFIID subunit, involved in RNA pol II transcription initiation; possesses in vitro histone acetyltransferase activity but its role in vivo appears to be minor; involved in promoter binding and G1/S progression; relocalizes to the cytosol in response to hypoxia	II	5.38078	5.0336	4.56041	3.47135	2.85835	1.23188	0.19682	-4.28149	UGUACACUAU		I	II	929	76	1308	356	246	44	7	-0.493	26.1115	1.15817	nucleus
YHR072W-A	NOP1	Subunit of box H/ACA snoRNP complex; required for pseudouridylation and processing of pre-18S rRNA	II	5.73341	5.0389	4.45162	3.84516	3.15498	1.21926	-2.69653	-3.2815	UGUAUAGUAC			I	3732	15	5569	259	148	10	4	NA	919.379	40.7787	nucleolus
YNL213C	RRG9	Protein of unknown function; null mutant lacks mitochondrial DNA and cannot grow on glycerol; the authentic, non-tagged protein is detected in highly purified mitochondria in high-throughput studies	II	3.79896	3.46139	3.13904	2.65213	2.29371	0.653539	-2.51692	0	UGUACAUUAG	II		II	3248	64	5067	51	663	1	13	-0.65	34.577	1.53365	mitochondrion
YLR106C	MDN1	Huge dynein-related AAA-type ATPase (midasin); forms extended pre-60S particle with the Rix1 complex (Rix1p-Ipi1p-Ipi3p); acts in removal of ribosomal biogenesis factors at successive steps of pre-60S assembly and export from nucleus	II	5.22541	4.41619	3.2422	1.95246	1.05775	0.137131	-0.709563	0	UGUAAACUAU	IV		II	30088	7	46976	246	6927	19	5	0.103	72.3137	3.20745	cytoplasm,nucleus
YDR353W	TRR1	Cytoplasmic thioredoxin reductase; key regulatory enzyme that determines the redox state of the thioredoxin system, which acts as a disulfide reductase system and protects cells against both oxidative and reductive stress; protein abundance increases in response to DNA replication stress; TRR1 has a paralog, TRR2, that arose from the whole genome duplication	II	5.4291	4.49242	3.41152	2.23224	1.02519	-0.327824	-1.69653	-1.95957	UGUAUACUUA		III	I	513	3	10458	823	154	112	3	NA	473.535	21.0035	cytoplasm,nucleus
YOR243C	PUS7	Pseudouridine synthase; catalyzes pseudouridylation at positions 35 and 56 in U2 snRNA, position 50 in 5S rRNA, position 13 in cytoplasmic tRNAs, and position 35 in pre-tRNA(Tyr); also pseudouridylates some mRNAs; relocates from nucleus to cytoplasm during heat shock and differentially modifies some mRNAs during heat shock; conserved in archaea, vertebrates, and some bacteria	II	4.20324	3.50834	2.85218	2.28456	1.50181	-0.041784	-0.931956	0	UGUAUAUUAG			II	39923	19	61608	1748	10714	300	7	0.008	118.569	5.25911	nucleus
YOR272W	YTM1	Constituent of 66S pre-ribosomal particles; forms a complex with Nop7p and Erb1p that is required for maturation of the large ribosomal subunit; has seven C-terminal WD repeats	II	4.76031	4.26317	3.46602	2.81481	2.2351	-0.454364	-1.60393	0	UGUAGAAUAA		II	I	9009	23	15995	51	3261	8	4	0.03	154.368	6.84694	nucleolus,nucleus
YNL064C	YDJ1	Type I HSP40 co-chaperone; involved in regulation of HSP90 and HSP70 functions; acts as an adaptor that helps Rsp5p recognize cytosolic misfolded proteins for ubiquitylation after heat shock; critical for determining cell size at Start as a function of growth rate; involved in protein translocation across membranes; member of the DnaJ family	II	6.10094	5.23178	4.30727	3.47127	2.48323	1.37867	0.349854	0	UGUAAAGUAA		III	I	8553	73	13151	5748	3400	6957	10	NA	483.939	21.4649	cytoplasm,nucleus
YDR385W	EFT2	Elongation factor 2 (EF-2), also encoded by EFT1; catalyzes ribosomal translocation during protein synthesis; contains diphthamide, the unique posttranslationally modified histidine residue specifically ADP-ribosylated by diphtheria toxin; EFT2 has a paralog, EFT1, that arose from the whole genome duplication	II	4.54437	4.01334	3.23663	1.90361	1.02519	0.493896	-2.14473	-3.51692	UGUAUAAUAG		III	II	44473	11	67522	24	12843	2	8	NA	82.5943	3.66344	cytoplasm
YMR309C	NIP1	eIF3c subunit of the eukaryotic translation initiation factor 3 (eIF3); involved in the assembly of preinitiation complex and start codon selection	II	4.66973	4.47307	4.06525	3.51937	2.44302	1.3645	-0.011725	-3.51692	UGUACAUUAC			I	3248	89	5067	142	345	78	5	-0.693	401.322	17.8005	cytoplasm
YOR310C	NOP58	Protein involved in producing mature rRNAs and snoRNAs; involved in pre-rRNA processing, 18S rRNA synthesis, and snoRNA synthesis; component of the small subunit processome complex, which is required for processing of pre-18S rRNA	II	4.79724	4.18494	3.71944	3.29362	2.27997	1.07526	0.089198	-3.51692	UGUAAAUUAG			I	47241	60	83390	246	13498	20	7	NA	293.695	13.0268	nucleolus
YPL187W	MF(ALPHA)1	Mating pheromone alpha-factor, made by alpha cells; interacts with mating type a cells to induce cell cycle arrest and other responses leading to mating; also encoded by MF(ALPHA)2, although MF(ALPHA)1 produces most alpha-factor; MF(ALPHA)1 has a paralog, MF(ALPHA)2, that arose from the whole genome duplication	II	4.34579	3.71909	2.9941	2.54838	1.26943	-0.018969	-0.152677	-2.84914	UAUACACUAA	III	I	II	12	43	41	251	2	18	1	NA	1924.21	85.3475	NA
YLR435W	TSR2	Protein with a potential role in pre-rRNA processing	II	5.35203	4.93182	4.64433	4.15319	3.33681	1.87953	-1.31886	0	UGUAUAUUAU		III	I	39923	166	61608	243	7219	6	3	-0.89	115.56	5.12564	cytoplasm,nucleus
YPR137W	RRP9	Protein involved in pre-rRNA processing; associated with U3 snRNP; component of small ribosomal subunit (SSU) processosome; ortholog of the human U3-55k protein	II	4.87994	4.36991	3.96001	3.42516	2.71787	1.47825	-1.60393	-3.2815	UGUAAAAUAU			I	62281	51	107890	148	13320	5	7	0.268	103.62	4.59605	nucleolus
YMR116C	ASC1	G-protein beta subunit and guanine dissociation inhibitor for Gpa2p; ortholog of RACK1 that inhibits translation; core component of the small (40S) ribosomal subunit; required to prevent frameshifting at ribosomes stalled at repeated CGA codons; regulates P-body formation induced by replication stress; represses Gcn4p in the absence of amino acid starvation	II	4.2858	3.70312	3.16409	2.82215	2.1306	0.838865	-0.527211	-3.2815	UGUAUAAUAU		II	I	44473	2	67522	71	9264	2	5	NA	2553.12	113.243	NA
YBR079C	RPG1	eIF3a subunit of the eukaryotic translation initiation factor 3 (eIF3); subunit of the core complex of eIF3; essential for translation; part of a Prt1p-Rpg1p-Nip1p subcomplex that stimulates binding of mRNA and tRNA(i)Met to ribosomes; involved in translation reinitiation	II	4.73502	3.99265	3.47408	2.61876	1.41832	-0.849139	-3.2815	0	UGUACAUAAU		IV	I	287	12	746	51	87	10	4	-0.191	253.67	11.2514	cytoplasm
YML017W	PSP2	Asn rich cytoplasmic protein that contains RGG motifs; high-copy suppressor of group II intron-splicing defects of a mutation in MRS2 and of a conditional mutation in POL1 (DNA polymerase alpha); possible role in mitochondrial mRNA splicing	II	4.0063	3.73503	3.31677	2.90147	1.12694	-0.346993	-3.51692	0	UGUAAUAUAG			II	15767	81	25034	66	4348	1	4	0.051	51.8721	2.30077	cytoplasm
YDR471W	RPL27B	Ribosomal 60S subunit protein L27B; homologous to mammalian ribosomal protein L27, no bacterial homolog; RPL27B has a paralog, RPL27A, that arose from the whole genome duplication	II	5.77211	5.03419	4.33591	3.39174	2.04871	-0.120244	-2.14473	0	UGUGUACUAU	III	I	I	229	25	374	132	149	4	5	NA	738.653	32.7627	cytoplasm
YDR463W	STP1	Transcription factor; contains a N-terminal regulatory motif (RI) that acts as a cytoplasmic retention determinant and as an Asi dependent degron in the nucleus; undergoes proteolytic processing by SPS (Ssy1p-Ptr3p-Ssy5p)-sensor component Ssy5p in response to extracellular amino acids; activates transcription of amino acid permease genes and may have a role in tRNA processing; STP1 has a paralog,…	II	3.74686	3.62414	3.30134	2.93316	2.00884	0.580725	-2.69653	0	UGUAUACUAU			II	7713	21	10458	85	1642	1	6	0.249	39.6995	1.76086	nucleus
YLR325C	RPL38	Ribosomal 60S subunit protein L38; homologous to mammalian ribosomal protein L38, no bacterial homolog	II	4.81931	3.70594	2.92824	2.21118	1.29954	-0.318856	0	0	UGUGUAAUAA	III	I	II	953	5	1599	455	248	11	3	NA	3324.77	147.469	cytoplasm
YER126C	NSA2	Protein constituent of 66S pre-ribosomal particles; contributes to processing of the 27S pre-rRNA	II	3.92483	3.50378	3.1976	2.62704	1.74226	0.95409	-0.59308	-3.51692	UGUACAAUAU		III	I	5820	20	9680	198	1189	14	3	-0.167	220.822	9.7945	cytoplasm
YDR429C	TIF35	eIF3g subunit of the eukaryotic translation initiation factor 3 (eIF3); subunit of the core complex of eIF3; is essential for translation; stimulates resumption of ribosomal scanning during translation reinitiation	II	5.45107	4.93731	4.24923	3.45994	2.25529	0.550538	-3.51692	-3.51692	UGUAAACUAA			I	30088	8	46976	218	10823	8	7	NA	466.888	20.7087	cytoplasm
YLR017W	MEU1	Methylthioadenosine phosphorylase (MTAP); catalyzes the initial step in the methionine salvage pathway; affects polyamine biosynthesis through regulation of ornithine decarboxylase (Spe1p) activity; regulates ADH2 gene expression	II	5.23993	4.62028	4.08677	3.54173	2.39439	0.56571	0	0	UGUAAAAUAU		II	I	62281	174	107890	143	13320	2	5	-0.074	150.332	6.66792	cytoplasm,nucleus
YGR187C	HGH1	Nonessential protein of unknown function; predicted to be involved in ribosome biogenesis; green fluorescent protein (GFP)-fusion protein localizes to the cytoplasm; similar to mammalian BRP16 (Brain protein 16); relative distribution to the nucleus increases upon DNA replication stress	II	4.6842	4.29793	3.7584	2.90777	2.34297	1.18389	0.315037	-0.47414	UGUAUAAUAC		II	I	44473	1	67522	203	1878	5	6	-0.705	64.7171	2.87051	cytoplasm
YGR116W	SPT6	Nucleosome remodeling protein; functions in various aspects of transcription, chromatin maintenance, and RNA processing; required for the maintenance of chromatin structure during transcription in order to inhibit transcription from promoters within the coding region; required for H3K36 trimethylation but not dimethylation by Set2p	II	5.0972	4.43615	3.58943	2.69403	1.56841	0.203059	-1.84914	-3.2815	UGUAAACUAG		III	II	30088	121	46976	25	7231	3	6	-0.184	149.15	6.61549	nucleus
YBL003C	HTA2	Histone H2A; core histone protein required for chromatin assembly and chromosome function; one of two nearly identical (see also HTA1) subtypes; DNA damage-dependent phosphorylation by Mec1p facilitates DNA repair; acetylated by Nat4p	II	4.77472	4.10496	3.54249	3.11696	2.23188	1.20963	0.19682	-0.088524	UGUAUAGUAU			I	3732	94	5569	85	726	8	7	NA	626.325	27.7804	nucleus
YGL062W	PYC1	Pyruvate carboxylase isoform; cytoplasmic enzyme that converts pyruvate to oxaloacetate; differentially regulated than isoform Pyc2p; mutations in the human homolog are associated with lactic acidosis; PYC1 has a paralog, PYC2, that arose from the whole genome duplication	II	4.91469	4.19334	3.44039	2.40588	1.17084	-0.49537	-2.2815	-3.2815	UGUAUAAUAU			I	44473	8	67522	797	9264	343	6	-0.643	90.3625	4.008	cytoplasm
YJL109C	UTP1	Nucleolar protein; component of the small subunit (SSU) processome containing the U3 snoRNA that is involved in processing of pre-18S rRNA; mutant has increased aneuploidy tolerance	II	5.80345	5.1666	4.61088	3.85643	2.69735	0.575925	-1.60393	-4.28149	UGUAAAUUUU			I	3243	41	83390	336	554	10	8	-0.349	180.472	8.00477	nucleolus
YML080W	DUS1	Dihydrouridine synthase; member of a widespread family of conserved proteins including Smm1p, Dus3p, and Dus4p; modifies pre-tRNA(Phe) at U17	II	4.06434	3.706	3.32962	2.85439	1.93525	0.488797	-0.849139	-2.84914	UGUAUAUUAA		IV	I	39923	72	61608	193	16718	26	12	-0.265	47.5505	2.10909	nucleus
YER049W	TPA1	Fe(II)/2-oxoglutarate-dependent dioxygenase family member; catalyzes the repair of methyl-base lesions in both ss and dsDNA by oxidative demethylation; Poly(rA)-binding protein involved in mRNA poly(A) tail length and mRNA stability; role in translation termination efficiency; interacts with Sup45p (eRF1), Sup35p (eRF3) and Pab1p; similar to human prolyl 4-hydroxylase OGFOD1; binds Fe(II) and 2-o…	II	4.45958	3.97469	3.56706	2.9447	2.13223	0.946672	-0.537577	-2.2815	UGUAUAAUAG		II	I	44473	251	67522	1105	12843	121	8	0.05	151.915	6.73815	nucleus
YLR419W		Putative helicase with limited sequence similarity to human Rb protein; the authentic, non-tagged protein is detected in highly purified mitochondria in high-throughput studies; YLR419W is not an essential gene	II	4.20164	3.69279	3.29744	2.63785	1.86756	0.315037	-1.39441	0	UGUAUAAUAA			II	44473	1675	67522	52	16608	2	4	-0.129	36.0346	1.5983	cytoplasm
YOR361C	PRT1	eIF3b subunit of the eukaryotic translation initiation factor 3 (eIF3); subunit of the core complex of eIF3; essential for translation; part of a subcomplex (Prt1p-Rpg1p-Nip1p) that stimulates binding of mRNA and tRNA(i)Met to ribosomes	II	6.17938	5.55982	4.85731	4.09061	3.00218	0.938779	-1.93196	0	UGUAAACUAA		IV	I	30088	447	46976	1245	10823	86	9	NA	291.658	12.9364	cytoplasm
YMR044W	IOC4	Member of a complex (Isw1b) with Isw1p and Ioc2p; interacts directly with H3K36me3 nucleosomes through its PWWP domain to recruit the Isw1b complex to open reading frames in a Set2p-dependent manner; Isw1b exhibits nucleosome-stimulated ATPase activity and acts within coding regions to coordinate transcription elongation with termination and processing	II	4.04606	3.44902	3.01417	2.57444	1.92519	1.0431	-0.709563	-3.51692	UGUACUAUAA		II	I	2809	9	4693	64	1131	1	9	-0.115	21.4135	0.94979	nucleus
YBR088C	POL3	Proliferating cell nuclear antigen (PCNA); functions as the sliding clamp for DNA polymerase delta; may function as a docking site for other proteins required for mitotic and meiotic chromosomal DNA replication and for DNA repair	II	4.5139	4.14497	3.77207	3.36822	2.62123	1.74252	0.488797	-0.849139	UGUAUACUAA			I	7713	1	10458	2590	3109	266	4	-0.518	187.771	8.32853	nucleus
YLR129W	DIP2	Nucleolar protein; specifically associated with the U3 snoRNA, part of the large ribonucleoprotein complex known as the small subunit (SSU) processome, required for 18S rRNA biogenesis, part of the active pre-rRNA processing complex	II	4.83615	4.3306	3.61316	2.61016	2.04678	0.713122	-3.2815	-3.2815	UGUAUAUUAU			I	39923	48	61608	37	7219	0	10	-0.156	94.4533	4.18945	cytoplasm,nucleus
YOL027C	MDM38	Mitochondrial protein; forms a complex with Mba1p to facilitate recruitment of mRNA-specific translational activators to ribosomes; roles in protein export and K+/H+ exchange; human ortholog Letm1 implicated in Wolf-Hirschhorn syndrome	II	3.58824	2.9967	2.30262	1.01772	0.915281	-0.414491	-0.516918	-2.51692	UGUAUAUAAU	I	III	II	5022	199	11790	859	1322	114	5	0.169	81.8506	3.63046	mitochondrion
YPL198W	RPL7B	Ribosomal 60S subunit protein L7B; required for processing of 27SA3 pre-rRNA to 27SB pre-rRNA during assembly of large ribosomal subunit; depletion leads to a turnover of pre-rRNA; contains a conserved C-terminal Nucleic acid Binding Domain (NDB2); binds to Domain II of 25S and 5.8S rRNAs; homologous to mammalian ribosomal protein L7 and bacterial L30; RPL7B has a paralog, RPL7A, that arose from …	II	3.27092	2.66276	2.28621	1.69057	0.320786	-0.809447	0	0	UGUAUAAUAA		IV	I	44473	12	67522	175	16608	1	10	NA	68.2106	3.02546	cytoplasm,nucleolus
YPL220W	RPL1A	Ribosomal 60S subunit protein L1A; N-terminally acetylated; homologous to mammalian ribosomal protein L10A and bacterial L1; RPL1A has a paralog, RPL1B, that arose from the whole genome duplication; rpl1a rpl1b double null mutation is lethal	II	3.18538	2.52389	1.77317	1.29078	0.266106	-0.989378	-1.67349	-1.67349	UGUAUUUAGU	III	I	II	89	0	671	221	19	4	4	NA	194.125	8.61034	cytoplasm
YLR300W	EXG1	Major exo-1,3-beta-glucanase of the cell wall; involved in cell wall beta-glucan assembly; exists as three differentially glycosylated isoenzymes; EXG1 has a paralog, SPR1, that arose from the whole genome duplication	II	3.61687	3.02793	2.54809	1.95616	0.946672	-1.26418	-2.39441	0	UGUAACAUAA		II	I	21980	853	26038	1183	9587	53	2	NA	470.637	20.8749	vacuole
YDL184C	RPL41A	Ribosomal 60S subunit protein L41A; comprises only 25 amino acids; rpl41a rpl41b double null mutant is viable; homologous to mammalian ribosomal protein L41, no bacterial homolog; RPL41A has a paralog, RPL41B, that arose from the whole genome duplication	II	2.38174	1.60296	1.29371	1.07526	0.871487	0.461815	-0.414491	-0.59308	UGUAUUAUGU	III	II	II	293	0	7959	16	161	2	1	-0.778	2977.47	132.065	cytoplasm
YBL079W	NUP17	Subunit of the inner ring of the nuclear pore complex (NPC); contributes to NPC assembly and nucleocytoplasmic transport; both Nup170p and NUP157p are similar to human Nup155p; NUP170 has a paralog, NUP157, that arose from the whole genome duplication	II	2.61759	2.05583	1.45921	0.883646	0.222336	0	0	0	UGUAUAUUUU		IV	II	1763	3	61608	34	286	6	3	-0.074	80.7312	3.58081	nuclear periphery
YJR104C	SOD1	Cytosolic copper-zinc superoxide dismutase; detoxifies superoxide; stabilizes Yck1p and Yck2p kinases in glucose to repress respiration; phosphorylated by Dun1p, enters nucleus under oxidative stress to promote transcription of stress response genes; human ortholog SOD1 implicated in ALS and complements yeast null; abundance increases under DNA replication stress and during exposure to boric acid…	II	3.13151	2.32525	1.89378	1.43759	0.509672	-0.63829	-1.84914	0	UGUAUAUGAC	II	II	II	407	26	1686	43	62	5	6	NA	1154.46	51.2058	ambiguous,cytoplasm,nucleus
YLR180W	SAM1	S-adenosylmethionine synthetase; catalyzes transfer of the adenosyl group of ATP to the sulfur atom of methionine; SAM1 has a paralog, SAM2, that arose from the whole genome duplication	II	3.01428	2.52389	1.50433	0.988275	-0.63829	-1.03442	0	0	UGUACAUUAU		III	II	3248	10	5067	14	627	0	4	NA	558.609	24.7769	cytoplasm
YBR127C	VMA2	Subunit B of V1 peripheral membrane domain of vacuolar H+-ATPase; electrogenic proton pump found throughout the endomembrane system; contains nucleotide binding sites; also detected in the cytoplasm; protein abundance increases in response to DNA replication stress; human homolog ATP6V1B1 implicated in autosomal-recessive distal renal tubular acidosis (RTA) with sensorineural deafness; human ATP6…	II	2.38892	1.59083	1.38481	1.13751	0.753434	0.753434	0.290437	-0.057487	UGUAAAACCC		IV	III	1423	7324	7987	96	330	0	7	NA	731.572	32.4486	vacuolar membrane
YKL113C	RAD27	5' to 3' exonuclease, 5' flap endonuclease; required for Okazaki fragment processing and maturation, for long-patch base-excision repair and large loop repair (LLR), ribonucleotide excision repair; member of the S. pombe RAD2/FEN1 family; relocalizes to the cytosol in response to hypoxia	II	4.30482	3.68947	2.79058	2.08433	1.25714	-0.721332	0	0	UGUAACAUAG			II	21980	77	26038	32	2867	2	9	-0.319	65.7079	2.91445	nucleus
YJL130C	URA2	Bifunctional carbamoylphosphate synthetase/aspartate transcarbamylase; catalyzes the first two enzymatic steps in the de novo biosynthesis of pyrimidines; both activities are subject to feedback inhibition by UTP	II	3.29525	2.89077	2.57203	2.2048	1.08583	-1.03442	-2.84914	-2.84914	UGUAUAUUAC			I	39923	17	61608	853	1713	62	3	-0.421	293.245	13.0068	cytoplasm
YOR340C	RPA43	RNA polymerase I subunit A43	II	3.19595	2.55068	1.8957	1.45921	0.514698	-1.31886	-2.14473	0	UGUACAUUAU			I	3248	40	5067	103	627	1	5	-0.26	196.542	8.71755	nucleolus
YMR300C	ADE4	Phosphoribosylpyrophosphate amidotransferase (PRPPAT); catalyzes first step of the 'de novo' purine nucleotide biosynthetic pathway; also known as amidophosphoribosyltransferase	II	4.01936	3.55075	2.94853	2.12201	0.911476	-0.318856	-2.14473	-2.14473	UGUAAAAUAG			I	62281	13	107890	66	17519	38	3	-0.04	92.3938	4.0981	cytoplasm
YOR204W	DED1	ATP-dependent DEAD (Asp-Glu-Ala-Asp)-box RNA helicase; required for translation initiation of all yeast mRNAs; binds to mRNA cap-associated factors, and binding stimulates Ded1p RNA-dependent ATPase activity; mutation in human homolog DBY is associated with male infertility; human homolog DDX3X complements ded1 null mutation; DED1 has a paralog, DBP1, that arose from the whole genome duplication	II	0.79265	0.717996	0.434939	0.434939	-0.169642	-0.414491	-0.709563	-1.51692	UGUGUUGUUU			III	2	2	42	25	1	1	1	-0.26	608.48	26.9889	NA
YDR308C	SRB7	Subunit of the RNA polymerase II mediator complex; associates with core polymerase subunits to form the RNA polymerase II holoenzyme; essential for transcriptional regulation; target of the global repressor Tup1p	II	2.83987	2.58698	1.98466	1.83261	1.08583	0.290437	0	0	UGUAAAUUAC	III	II	II	47241	132	83390	177	2199	11	3	-0.634	52.7011	2.33754	nucleus
YIL051C	MMF1	Mitochondrial protein required for transamination of isoleucine; but not of valine or leucine; may regulate specificity of branched-chain transaminases Bat1p and Bat2p; induction of expression in response to stress is mediated by a Hog1p-regulated antisense RNA and gene looping; interacts genetically with mitochondrial ribosomal protein genes; MMF1 has a paralog, HMF1, that arose from the whole g…	II	2.87878	2.10153	1.44844	0.278668	-0.424075	-0.424075	-1.04918	-1.04918	UGUACAUUUA	III	II	II	110	27	5067	33	26	0	4	NA	933.849	41.4206	mitochondrion
YDR144C	MKC7	GPI-anchored aspartyl protease; member of the yapsin family of proteases involved in cell wall growth and maintenance; shares functions with Yap3p and Kex2p; MKC7 has a paralog, YPS1, that arose from the whole genome duplication	II	3.81582	3.14744	2.51484	2.10153	0.847323	0.07566	0	0	UGUACAUUAC			II	3248	42	5067	381	345	24	1	-0.294	95.4353	4.233	vacuole
YIL075C	RPN2	Subunit of the 26S proteasome; substrate of the N-acetyltransferase Nat1p; protein abundance increases in response to DNA replication stress	II	2.77632	2.33397	1.9233	1.26312	-0.527211	-0.989378	-1.51692	-1.93196	UGUACAUACU			II	59	4	746	21	19	0	7	0.053	160.37	7.11315	cytoplasm,nucleus
YBL006C	LDB7	Component of the RSC chromatin remodeling complex; interacts with Rsc3p, Rsc30p, Npl6p, and Htl1p to form a module important for a broad range of RSC functions	II	4.08992	3.34368	2.65555	1.89763	1.34985	-1.19499	0	0	UAUAUACUAU		II	II	156	166	727	1140	47	115	3	0.033	65.1561	2.88998	NA
YGR234W	YHB1	Nitric oxide oxidoreductase; flavohemoglobin involved in nitric oxide detoxification; plays a role in the oxidative and nitrosative stress responses; protein increases in abundance and relocalizes from nucleus to cytoplasmic foci upon DNA replication stress	II	3.75951	2.9273	2.18547	1.60532	0.241359	-1.69653	-1.69653	-1.69653	UGUAUUUAUA		I	II	258	6	671	95	95	9	10	NA	458.786	20.3493	cytoplasm
YKR095W	MLP1	Myosin-like protein associated with the nuclear envelope; nuclear basket protein that connects the nuclear pore complex with the nuclear interior; involved with Tel1p in telomere length control; involved with Pml1p and Pml39p in nuclear retention of unspliced mRNAs; MLP1 has a paralog, MLP2, that arose from the whole genome duplication	II	2.96201	2.30586	2.14077	1.74893	0.483082	0.389972	-3.51692	0	UGUAAUAUAC		II	II	15767	44	25034	89	325	5	6	-0.239	55.5197	2.46256	nuclear periphery
YPR161C	SGV1	Cyclin (Bur2p)-dependent protein kinase; part of the BUR kinase complex which functions in transcriptional regulation; phosphorylates the carboxy-terminal domain (CTD) of Rpo21p and the C-terminal repeat domain of Spt5p; recruits Spt6p to the CTD at the onset of transcription; regulated by Cak1p; similar to metazoan CDK9 proteins	II	2.57606	1.8555	1.61029	1.25078	0.483082	-1.93196	-1.93196	0	UGUAAUCUAU		IV	II	1070	5	2371	11	148	0	2	0.639	48.8247	2.1656	nucleus
YEL055C	POL5	DNA Polymerase phi; has sequence similarity to the human MybBP1A and weak sequence similarity to B-type DNA polymerases, not required for chromosomal DNA replication; required for the synthesis of rRNA	II	3.85693	3.43346	2.99949	2.44697	0.60032	-0.291257	-0.989378	-2.51692	UGUAAAAUAU	III	III	II	62281	62	107890	87	13320	10	4	-0.285	130.407	5.78417	nucleolus,nucleus
YMR161W	HLJ1	Co-chaperone for Hsp40p; anchored in the ER membrane; with its homolog Ydj1p promotes ER-associated protein degradation (ERAD) of integral membrane substrates; similar to E. coli DnaJ	II	2.64858	2.19507	1.90361	1.639	0.950386	-0.59308	-0.931956	-2.51692	UGUAUACUAG		II	II	7713	15	10458	84	1930	3	4	-0.641	42.955	1.90525	ER
YER156C		Putative protein of unknown function; interacts with Hsp82p and copurifies with Ipl1p; expression is copper responsive and downregulated in strains deleted for MAC1, a copper-responsive transcription factor; similarity to mammalian MYG1	II	2.39591	2.00507	1.28162	0.61498	-0.144732	-1.45436	-1.45436	-2.14473	UGUAUAGUAA			II	3732	110	5569	265	1514	7	4	-0.656	150.007	6.6535	cytoplasm,nucleus
YNL112W	DBP2	ATP-dependent RNA helicase of the DEAD-box protein family; has a strong preference for dsRNA; interacts with YRA1; required for the assembly of Yra1p, Nab2p and Mex67p onto mRNA and formation of nuclear mRNP; involved in mRNA decay and rRNA processing; may be involved in suppression of transcription from cryptic initiation sites	II	3.28465	2.86756	2.24759	1.421	0.401504	-1.14473	-1.93196	0	UGUAUACUAC	II		II	7713	112	10458	349	293	50	4	-0.566	242.634	10.762	cytoplasm,nucleus
YDR458C	HEH2	Inner nuclear membrane (INM) protein; contains helix-extension-helix (HEH) motif, nuclear localization signal sequence; targeting to the INM requires the Srp1p-Kap95p karyopherins and the Ran cycle; HEH2 has a paralog, SRC1, that arose from the whole genome duplication	II	1.36171	1.04698	1.01062	0.708743	0.56571	-1.19499	-1.19499	-1.19499	UGUAAAAUAU		IV	III	62281	9	107890	28	13320	1	9	-0.563	31.553	1.39952	nuclear periphery
YOR326W	MYO2	Type V myosin motor involved in actin-based transport of cargos; required for the polarized delivery of secretory vesicles, the vacuole, late Golgi elements, peroxisomes, and the mitotic spindle; MYO2 has a paralog, MYO4, that arose from the whole genome duplication	II	2.62472	2.18055	1.65555	1.29663	0.81774	-0.709563	-0.931956	0	UGUACAUGAA		IV	II	20	11	126	36	7	3	5	0.143	126.859	5.62679	ambiguous,bud neck,cytoplasm,cell periphery,bud
YDL064W	UBC9	SUMO-conjugating enzyme involved in the Smt3p conjugation pathway; nuclear protein required for S- and M-phase cyclin degradation and mitotic control; involved in proteolysis mediated by the anaphase-promoting complex cyclosome (APCC)	II	3.48865	2.69735	2.0124	0.935035	0.241359	-0.264176	-1.19499	-1.51692	UGUACUUUAU		II	II	450	660	1164	280	63	19	5	-0.052	106.107	4.70635	cytoplasm,nucleus
YDL166C	FAP7	Essential NTPase required for small ribosome subunit synthesis; mediates processing of the 20S pre-rRNA at site D in the cytoplasm but associates only transiently with 43S preribosomes via Rps14p; complex with Rps14 is conserved between humans, yeast, and arches; may be the endonuclease for site D; depletion leads to accumulation of pre-40S ribosomes in 80S-like ribosomes	II	3.12457	2.79987	2.57444	2.27536	1.70409	0.871487	-0.034425	-1.93196	UGUAAAUUAG			I	47241	7	83390	124	13498	3	6	-1.014	66.0429	2.92931	cytoplasm,nucleus
YOR061W	CKA2	Alpha' catalytic subunit of casein kinase 2 (CK2); CK2 is a Ser/Thr protein kinase with roles in cell growth and proliferation; CK2, comprised of CKA1, CKA2, CKB1 and CKB2, has many substrates including transcription factors and all RNA polymerases; protein abundance increases in response to DNA replication stress; regulates Fkh1p-mediated donor preference during mating-type switching	II	2.55327	1.92141	1.6367	1.13387	0.81774	0.017719	-0.057487	-1.93196	UGUAGAUUAU			II	5002	0	9834	12	884	3	7	0.075	130.675	5.79603	cytoplasm,nucleus
YFL023W	BUD27	Unconventional prefoldin protein involved in translation initiation; required for correct assembly of RNAP I, II, and III in an Rpb5p-dependent manner; shuttles between nucleus and cytoplasm; mutants have inappropriate expression of nutrient sensitive genes due to translational derepression of Gcn4p transcription factor; diploid mutants show random budding; ortholog of human URI/RMP	II	3.07726	2.67204	2.31037	1.73582	0.190553	-0.454364	-0.931956	-1.93196	UGUACAAUAA			II	5820	26	9680	16	2141	5	5	0.018	28.2265	1.25198	cytoplasm
YBR061C	TRM7	2'-O-ribose methyltransferase; methylates the 2'-O-ribose of tRNA-Phe, tRNA-Trp, and tRNA-Leu at positions C32 and N34 of tRNA anticodon loop; crucial biological role likely modification of tRNA-Phe; interacts with Trm732p and Rtt10p in 2'-O-methylation of C32 and N34 substrate tRNAs, respectively; yeast null mutant can be functionally complemented by human FTSJ1, mutations in which have been imp…	II	3.4518	2.90265	2.5147	2.22387	1.49898	-0.034425	-0.673487	0	UGUAUAAUAU		III	II	44473	150	67522	828	9264	35	6	-0.276	72.7817	3.22821	cytoplasm
YNL067W-B		Putative protein of unknown function	II	3.70648	3.25621	2.54564	1.81367	0.838865	0.110047	-1.03442	0	UUUGAAAUAG			II	14	4	120	10378	1	1581	0	NA	0	#N/A	NA
YKL164C	PIR1	O-glycosylated protein required for cell wall stability; attached to the cell wall via beta-1,3-glucan; mediates mitochondrial translocation of Apn1p; expression regulated by the cell integrity pathway and by Swi5p during the cell cycle; PIR1 has a paralog, YJL160C, that arose from the whole genome duplication	II	3.11458	2.72694	2.4308	2.20981	1.82025	0.919519	0.472789	-0.424075	UGUACAUUAG			I	3248	19	5067	341	663	20	3	NA	391.664	17.3721	cytoplasm,nucleus
YPR010C	RPA135	RNA polymerase I second largest subunit A135	II	3.20731	1.83261	1.22882	0.919519	0.418318	-0.255594	-1.51692	0	UGUAUCAUAU		III	II	3621	3	4458	473	843	14	9	NA	339.087	15.0401	nucleolus
YCR051W		Putative protein of unknown function; green fluorescent protein (GFP)-fusion protein localizes to the cytoplasm and nucleus; contains ankyrin (Ank) repeats; YCR051W is not an essential gene	II	4.12992	3.42881	2.83272	2.18231	0.908107	-0.733197	-2.2815	0	UGUACAUUAA			II	3248	16	5067	283	1318	40	4	-0.766	111.262	4.935	cytoplasm,nucleus
YNL044W	YIP3	Protein localized to COPII vesicles; proposed to be involved in ER to Golgi transport; interacts with members of the Rab GTPase family and Yip1p; also interacts with Rtn1p	II	2.93023	2.1306	1.38174	0.935035	0.21618	-1.39441	0	0	UGUAUUUUAC	IV	II	II	2008	138	4228	385	27	19	5	-0.111	126.699	5.61968	Golgi,early Golgi
YNL004W	HRB1	Poly(A+) RNA-binding protein; key surveillance factor for the selective export of spliced mRNAs from the nucleus to the cytoplasm; preference for intron-containing genes; similar to Npl3p; HRB1 has a paralog, GBP2, that arose from the whole genome duplication	II	3.27397	2.49786	2.25228	1.92141	1.07186	-0.796941	0	0	UGUAUACGUA			II	98	19	273	159	67	4	8	-0.001	45.0439	1.99791	nucleus
YOR327C	SNC2	Vesicle membrane receptor protein (v-SNARE); involved in the fusion between Golgi-derived secretory vesicles with the plasma membrane; Snc2p levels regulated by Vps45p; member of the synaptobrevin/VAMP family of R-type v-SNARE proteins; SNC2 has a paralog, SNC1, that arose from the whole genome duplication	II	2.69969	2.32222	1.81594	1.03613	0.082445	-0.721332	-3.2815	0	UGUACACUAA		IV	I	929	13	1308	60	319	2	5	NA	164.574	7.29961	vacuole
YNL030W	HHF2	Histone H4; core histone protein required for chromatin assembly and chromosome function; one of two identical histone proteins (see also HHF1); contributes to telomeric silencing; N-terminal domain involved in maintaining genomic integrity	II	3.65562	3.29825	2.78607	2.3631	1.20653	0.36171	-1.84914	-2.84914	UGUACUAUAU		I	I	2809	3	4693	1780	543	641	7	NA	1294.96	57.4374	nucleus
YJL148W	RPA34	RNA polymerase I subunit A34.5; essential for nucleolar assembly and for high polymerase loading rate; nucleolar localization depends on Rpa49p	II	2.56329	2.1119	1.84709	1.44844	0.570545	0.068044	-0.19499	-0.346993	UGUAUACUCA		II	II	159	0	10458	7	26	1	7	NA	121.009	5.36729	nucleolus
YMR014W	BUD22	Protein required for rRNA maturation and ribosomal subunit biogenesis; required for 18S rRNA maturation; also required for small ribosomal subunit biogenesis; cosediments with pre-ribosomal particles; mutation decreases efficiency of +1 Ty1 frameshifting and transposition, and affects budding pattern	II	3.49127	2.99299	2.37453	1.98828	1.44844	1.00307	-3.51692	0	UGUAUAAUAA		IV	II	44473	254	67522	1147	16608	127	6	-0.612	42.9279	1.90405	nucleolus
YMR033W	ARP9	Component of both the SWI/SNF and RSC chromatin remodeling complexes; actin-related protein involved in transcriptional regulation	II	2.36605	1.69527	1.05045	0.713122	0.068044	-0.057487	0	0	UGUAAUAUAU	IV	II	II	15767	17	25034	70	2595	8	7	0.12	60.7212	2.69327	NA
YPL093W	NOG1	Putative GTPase; associates with free 60S ribosomal subunits in the nucleolus and is required for 60S ribosomal subunit biogenesis; constituent of 66S pre-ribosomal particles; member of the ODN family of nucleolar G-proteins	II	2.60663	2.34139	1.99029	1.8451	1.20653	0.643862	-0.264176	-1.39441	UGUAUAAUAA		IV	I	44473	12	67522	27	16608	0	10	-0.213	407.322	18.0666	nucleus
YGR063C	SPT4	Component of the universally conserved Spt4/5 complex (DSIF complex); the complex has multiple roles in concert with RNA polymerases I and II, including regulation of transcription elongation, RNA processing, quality control, and transcription-coupled DNA repair; Spt4p also localizes to kinetochores and heterochromatin and affects chromosome dynamics and silencing; required for transcription thro…	II	3.9959	2.89582	2.14925	1.63439	1.44581	0.704351	0.010622	-1.26418	UGUAUAAUAG			I	44473	18	67522	68	12843	0	6	-1.151	67.9536	3.01406	nucleus
YBR162W-A	YSY6	Protein of unknown function; expression suppresses a secretory pathway mutation in E. coli; has similarity to the mammalian RAMP4 protein involved in secretion	II	2.28162	2.15409	2.06824	1.78387	1.55054	1.42634	-2.69653	0	UGUAGACUGU				154	2	3341	57	85	5	4	NA	363.458	16.121	ER
YLR068W	FYV7	Essential protein required for maturation of 18S rRNA; required for survival upon exposure to K1 killer toxin	II	3.28301	2.79987	2.38586	1.57324	0.950386	-0.011725	-2.14473	-3.51692	UGUAUAUUAA			II	39923	112	61608	456	16718	6	3	-1.688	17.7979	0.78942	nucleolus,nucleus
YNL061W	NOP2	rRNA m5C methyltransferase; methylates cytosine at position 2870 of 25S rRNA while Rcm1p methylates cytosine at position 2278; contains seven beta-strand methyltransferase motif; essential for processing and maturation of 27S pre-rRNA and large ribosomal subunit biogenesis; localized to the nucleolus; constituent of 66S pre-ribosomal particles; homolog of p120/NSUN1, a human gene upregulated in c…	II	2.64501	2.41966	2.10672	1.89977	1.44581	0.999492	0.344219	-0.59308	UGUAUAUUAA			I	39923	15	61608	116	16718	7	1	-0.288	213.623	9.47516	nucleolus,nucleus
YLR293C	GSP1	Ran GTPase; GTP binding protein (mammalian Ranp homolog) involved in the maintenance of nuclear organization, RNA processing and transport; regulated by Srm1p, Rna1p, Yrb1p, Yrb2p, Yrp4p, Yrb30p, Cse1p and Kap95p; GSP1 has a paralog, GSP2, that arose from the whole genome duplication	II	4.69428	3.39029	2.71909	2.24456	0.423672	0.183521	-2.51692	0	UGUAUACAUA		I	II	28	32	301	17	10	1	3	NA	1642.32	72.8445	NA
YML129C	COX14	Mitochondrial cytochrome c oxidase (complex IV) assembly factor; also involved in translational regulation of Cox1p and prevention of Cox1p aggregation before assembly; associates with complex IV assembly intermediates and complex III/complex IV supercomplexes; located in the mitochondrial membrane	II	3.59855	3.35072	3.07791	1.28456	0.927078	-0.057487	-1.93196	0	UGUAUAUAAU	I		II	5022	1339	11790	1195	1322	621	4	-0.156	72.8515	3.2313	mitochondrion
YKL152C	GPM1	Tetrameric phosphoglycerate mutase; mediates the conversion of 3-phosphoglycerate to 2-phosphoglycerate during glycolysis and the reverse reaction during gluconeogenesis	II	2.39029	1.89185	1.59321	1.10339	0.620198	-0.049181	-0.809447	-1.93196	UGUAUACAGA		II	III	2	9	301	1983	0	422	2	NA	9298.35	412.425	cytoplasm
YER110C	KAP123	Karyopherin beta; mediates nuclear import of ribosomal proteins prior to assembly into ribosomes and import of histones H3 and H4; localizes to the nuclear pore, nucleus, and cytoplasm; exhibits genetic interactions with RAI1	II	4.4699	3.52312	2.3645	0.965575	0.266106	-1.03442	0	0	UGUAAAUUUA		II	II	3243	1898	83390	3917	900	87	7	-0.964	401.026	17.7874	cytoplasm,nucleus
YOR252W	TMA16	Protein of unknown function that associates with ribosomes	II	2.84198	2.60046	2.37176	2.16409	1.52777	0.493896	-0.318856	-1.93196	UGUAUAUUAU			I	39923	2	61608	268	7219	20	6	-1.034	93.1416	4.13126	nucleus
YCL054W	SPB1	AdoMet-dependent methyltransferase; involved in rRNA processing and 60S ribosomal subunit maturation; methylates G2922 in the tRNA docking site of the large subunit rRNA and in the absence of snR52, U2921; suppressor of PAB1 mutants	II	2.42932	2.25228	1.9155	1.53025	0.695009	-0.414491	-1.51692	-3.51692	UGUAUAAUAU			II	44473	1	67522	18	9264	0	5	-0.554	84.0936	3.72995	NA
YOL041C	NOP12	Nucleolar protein involved in pre-25S rRNA processing; also involved in biogenesis of large 60S ribosomal subunit; contains an RNA recognition motif (RRM); binds to Ebp2; similar to Nop13p and Nsr1p	II	3.593	3.23739	2.74012	2.23663	1.07526	0.039619	-1.51692	0	UGUAUAUUAU			II	39923	835	61608	671	7219	38	7	0.226	185.769	8.23974	nucleolus
YJR069C	HAM1	Nucleoside triphosphate pyrophosphohydrolase; active against various substrates including ITP, dITP and XTP; mediates exclusion of non canonical purines, pyrimidines from dNTP pools; functions with YJL055W to mediate resistance to 5-FU; specifically reduces the incorporation of 5-FU into RNA without affecting uptake or incorporation of uracil into RNA; protein abundance increases in response to D…	II	3.02969	2.51078	2.19019	1.8634	1.09966	-0.229168	-0.559769	-3.51692	UGUAUAUUAG			II	39923	63	61608	54	10714	2	3	-0.649	124.223	5.50988	cytoplasm,nucleus
YGR204W	ADE3	Cytoplasmic trifunctional enzyme C1-tetrahydrofolate synthase; involved in single carbon metabolism and required for biosynthesis of purines, thymidylate, methionine, and histidine; null mutation causes auxotrophy for adenine and histidine	III	2.66853	2.34422	1.98082	1.09631	0.157303	-4.28149	0	0	UGUAUAAUAA		IV	II	44473	2	67522	186	16608	0	6	NA	202.689	8.99021	cytoplasm,nucleus
YPR108W	RPN7	Essential non-ATPase regulatory subunit of the 26S proteasome; similar to another S. cerevisiae regulatory subunit, Rpn5p, as well as to mammalian proteasome subunits	III	4.18998	3.42175	2.79034	2.09631	0.643862	-2.39441	0	0	UGUAUACAUA		III	II	28	12	301	1920	10	307	5	0.318	148.968	6.60742	nucleus
YLL045C	RPL8B	Ribosomal 60S subunit protein L8B; required for processing of 27SA3 pre-rRNA to 27SB pre-rRNA during assembly of large ribosomal subunit; depletion leads to a turnover of pre-rRNA; L8 binds to Domain I of 25S and 5.8 S rRNAs; mutation results in decreased amounts of free 60S subunits; homologous to mammalian ribosomal protein L7A, no bacterial homolog; RPL8B has a paralog, RPL8A, that arose from …	III	3.49998	2.60427	1.94481	1.09296	0.260134	-1.39441	-1.60393	-4.28149	UGUAUACUUA		II	II	513	1086	10458	431	154	55	5	NA	2123.95	94.2071	cytoplasm
YJL020C	BBC1	Protein possibly involved in assembly of actin patches; interacts with an actin assembly factor Las17p and with the SH3 domains of Type I myosins Myo3p and Myo5p; localized predominantly to cortical actin patches	III	3.65909	2.46457	1.70189	0.842867	0	0	0	0	UGUAUAUUUU			II	1763	33	61608	23	286	0	9	0.18	53.1192	2.35608	NA
YGL123W	RPS2	Protein component of the small (40S) subunit; essential for control of translational accuracy; phosphorylation by C-terminal domain kinase I (CTDK-I) enhances translational accuracy; methylated on one or more arginine residues by Hmt1p; homologous to mammalian ribosomal protein S2 and bacterial S5	III	3.95395	2.9716	2.26646	1.22576	-0.454364	-1.93196	-3.51692	0	UGUACACUUA	IV	III	I	48	10	1308	130	12	19	7	NA	4878.04	216.364	NA
YJL197W	UBP12	Ubiquitin-specific protease; cleaves ubiquitin from ubiquitinated proteins; present in the nucleus and cytoplasm	III	3.61746	3.08319	2.23035	0.950386	0.326513	-4.28149	0	0	UGUAUAAUAC			II	44473	1738	67522	1784	1878	208	3	-0.422	35.3655	1.56863	cytoplasm,nucleus
YNL313C	EMW1	Essential conserved protein with a role in cell wall integrity; contains six TPR (tetratricopeptide repeat) domains clustered in the C-terminal region; conditional mutant is suppressed by overexpression of GFA1; protein abundance increases in response to DNA replication stress	III	3.69865	2.9958	2.42783	1.64359	-0.346993	-1.51692	0	0	UGUAUAUUAC			II	39923	5060	61608	518	1713	87	4	-0.678	82.2612	3.64867	cytoplasm,nucleus
YMR142C	RPL13B	Ribosomal 60S subunit protein L13B; not essential for viability; homologous to mammalian ribosomal protein L13, no bacterial homolog; RPL13B has a paralog, RPL13A, that arose from the whole genome duplication	III	3.88841	2.79896	1.90766	1.06119	0.039619	-3.51692	0	0	UGUACACUGU		II	II	71	10	1308	147	57	1	6	NA	1738.19	77.0967	cytoplasm
YLR172C	DPH5	Methyltransferase required for synthesis of diphthamide; diphthamide is a modified histidine residue of translation elongation factor 2 (Eft1p or Eft2p); not essential for viability; GFP-Dph5p fusion protein localizes to the cytoplasm	III	2.75886	2.18213	1.76873	1.35299	0.461815	-1.93196	-3.51692	0	UGUAUAUUGA		IV	II	1221	7	61608	33	363	0	4	-0.611	221.536	9.82616	cytoplasm
YLR409C	UTP21	Subunit of U3-containing 90S preribosome and SSU processome complexes; involved in production of 18S rRNA and assembly of small ribosomal subunit; synthetic defect with STI1 Hsp90 cochaperone; human homolog linked to glaucoma; Small Subunit processome is also known as SSU processome	III	3.45391	2.76098	2.50166	1.68114	-1.51692	-3.51692	-3.51692	0	UGUAUAUUUU		IV	II	1763	91	61608	172	286	11	7	-0.366	107.507	4.76846	nucleus
YBL047C	EDE1	Scaffold protein involved in the formation of early endocytic sites; putative regulator of cytokinesis; homo-oligomerization is required for localization to and organization of endocytic sites; has a network of interactions with other endocytic proteins; binds membranes in a ubiquitin-dependent manner; may also bind ubiquitinated membrane-associated proteins; interacts with Cmk2 and functions ups…	III	4.45383	3.83881	2.62833	1.76452	-0.570373	-2.14473	-4.28149	0	UGUAUAUUGU		III	II	1221	141	61608	830	659	21	12	-0.107	109.683	4.86496	punctate composite
YAL011W	SWC3	Protein of unknown function; component of the SWR1 complex, which exchanges histone variant H2AZ (Htz1p) for chromatin-bound histone H2A; required for formation of nuclear-associated array of smooth endoplasmic reticulum known as karmellae	III	3.17561	2.67542	1.71093	1.12365	0.183521	-2.51692	-3.51692	0	UGUAUAUUAA		II	II	39923	75	61608	42	16718	1	11	-0.029	14.6497	0.649784	nucleus
YOR259C	RPT4	ATPase of the 19S regulatory particle of the 26S proteasome; one of six ATPases of the regulatory particle; involved in degradation of ubiquitinated substrates; contributes preferentially to ERAD; required for spindle pole body duplication; mainly nuclear localization	III	2.80754	2.22423	1.63927	1.05085	0.018546	-1.77082	-3.51692	-3.51692	UGUACAAAAU			II	538	7	1294	99	165	6	5	-0.184	149.416	6.62729	nucleus
YPL082C	MOT1	Essential protein involved in regulation of transcription; removes Spt15p (TBP) from DNA via its C-terminal ATPase activity; may have a role in ensuring that soluble TBP is available to bind TATA-less promoters; forms a complex with TBP that binds TATA DNA with high affinity but with altered specificity; the Mot1p-Spt15p-DNA ternary complex contains unbent DNA	III	4.56268	3.87051	3.12795	1.68809	-1.45436	0	0	0	UGUAAUAUAA		II	II	15767	6	25034	64	6178	5	7	-0.48	56.8252	2.52046	nucleus
YGR090W	UTP22	Component of the small-subunit processome; required for nuclear export of tRNAs; may facilitate binding of Utp8p to aminoacylated tRNAs and their delivery to Los1p for export; conserved from yeast to mammals	III	3.388	2.83663	2.51078	1.98445	1.00307	-1.93196	0	0	UGUAUAAUAU		IV	II	44473	4	67522	73	9264	9	7	-0.269	121.222	5.37675	nucleolus,nucleus
YIL033C	BCY1	Regulatory subunit of the cyclic AMP-dependent protein kinase (PKA); PKA is a component of a signaling pathway that controls a variety of cellular processes, including metabolism, cell cycle, stress response, stationary phase, and sporulation	III	3.00774	2.61615	2.04678	0.40692	-1.31886	-2.51692	0	0	UGUAUAACAU			II	1583	2	4626	756	383	59	6	0.172	72.2983	3.20677	cytoplasm,nucleus
YPL240C	HSP82	Hsp90 chaperone; redundant in function with Hsc82p; required for pheromone signaling, negative regulation of Hsf1p; docks with Tom70p for mitochondrial preprotein delivery; promotes telomerase DNA binding, nucleotide addition; protein abundance increases in response to DNA replication stress; contains two acid-rich unstructured regions that promote solubility of chaperone-substrate complexes; HSP…	III	5.07719	4.14532	3.1632	1.06119	-1.14473	-1.84914	-3.2815	0	UGUAAAUAGG	II		II	2769	41	18934	191	229	16	9	NA	175.773	7.79636	cytoplasm
YFL034C-A	RPL22B	Ribosomal 60S subunit protein L22B; homologous to mammalian ribosomal protein L22, no bacterial homolog; RPL22B has a paralog, RPL22A, that arose from the whole genome duplication	III	4.88748	3.96619	2.63323	1.87976	0.695009	-2.39441	-2.39441	0	UGUAUAUUAA	IV	II	II	39923	36	61608	148	16718	5	7	NA	129.169	5.72925	cytoplasm
YOR341W	RPA19	RNA polymerase I largest subunit A190	III	4.46504	3.54441	2.26013	0.302789	-0.229168	-0.229168	-2.51692	-3.51692	UGUAAAUUAA			II	47241	1240	83390	1625	16322	156	6	NA	334.051	14.8167	nucleolus
YNL124W	NAF1	RNA-binding protein required for the assembly of box H/ACA snoRNPs; thus required for pre-rRNA processing; forms a complex with Shq1p and interacts with H/ACA snoRNP components Nhp2p and Cbf5p; similar to Gar1p	III	3.20808	2.52901	1.82001	1.53025	0.36171	-2.04918	0	0	UGUAUCAUAG			II	3621	202	4458	51	424	0	3	0.46	52.4298	2.32551	nucleus
YER026C	CHO1	Phosphatidylserine synthase; functions in phospholipid biosynthesis; catalyzes the reaction CDP-diaclyglycerol + L-serine = CMP + L-1-phosphatidylserine, transcriptionally repressed by myo-inositol and choline	III	3.87019	3.18389	1.94481	1.34139	-0.169642	-1.93196	0	0	UGUAUAUUAA	III	III	II	39923	25	61608	96	16718	37	12	0.197	139.577	6.19088	NA
YLR244C	MAP1	Methionine aminopeptidase; catalyzes the cotranslational removal of N-terminal methionine from nascent polypeptides; function is partially redundant with that of Map2p	III	3.89576	2.87356	1.42932	0.488797	-1.00368	-3.2815	-3.2815	0	UGUACUUUCC	II	III	II	31	86	1164	69	9	1	9	NA	356.026	15.7914	cytoplasm,nucleus
YNL175C	NOP13	Nucleolar protein found in preribosomal complexes; contains an RNA recognition motif (RRM); relative distribution to the nucleolus increases upon DNA replication stress	III	4.52656	3.65398	3.09547	2.51359	-0.374604	0	0	0	UGUAAAUUAU		III	I	47241	3	83390	43	9997	0	5	-0.265	182.561	8.09741	nucleolus,nucleus
YAL044C	GCV3	H subunit of the mitochondrial glycine decarboxylase complex; glycine decarboxylase is required for the catabolism of glycine to 5,10-methylene-THF; also required for all protein lipoylation; expression is regulated by levels of 5,10-methylene-THF	III	3.19507	2.05927	1.45368	0.788022	-0.088524	-2.84914	0	0	UGUAUAUAUA	III	III	II	2078	3	11790	79	695	0	3	NA	263.376	11.6819	mitochondrion
YIL142W	CCT2	Subunit beta of the cytosolic chaperonin Cct ring complex; related to Tcp1p, required for the assembly of actin and tubulins in vivo	III	5.03759	3.92835	2.9959	1.86143	-0.673487	-3.51692	0	0	UAUAUAAUUC		III	I	802	22	4212	31	51	0	9	-0.095	245.426	10.8858	NA
YHR058C	MED6	Subunit of the RNA polymerase II mediator complex; associates with core polymerase subunits to form the RNA polymerase II holoenzyme; essential for transcriptional regulation; protein abundance increases in response to DNA replication stress	III	2.91952	2.7369	2.08602	1.24171	0.727191	-1.77082	-3.51692	-3.51692	UGUACUAUAU		II	II	2809	19	4693	18	543	0	6	-0.253	31.3631	1.3911	cytoplasm,nucleus
YGR175C	ERG1	Squalene epoxidase; catalyzes the epoxidation of squalene to 2,3-oxidosqualene; plays an essential role in the ergosterol-biosynthesis pathway and is the specific target of the antifungal drug terbinafine	III	2.79253	2.43346	1.9273	1.18389	-0.264176	-2.51692	-3.51692	0	UGUAUAGUAC			I	3732	37	5569	78	148	3	7	NA	424.847	18.8439	ER
YDR325W	YCG1	Subunit of the condensin complex; required for establishment and maintenance of chromosome condensation, chromosome segregation and chromatin binding of the condensin complex; required for clustering of tRNA genes at the nucleolus; required for replication slow zone (RSZ) breakage following Mec1p inactivation	III	4.46099	3.40791	2.61979	1.8073	-1.14473	-4.28149	0	0	UGUAUUUUAU		II	II	2008	1100	4228	1838	306	22	7	0.32	26.037	1.15486	nucleolus,nucleus
YER048C	CAJ1	Nuclear type II J heat shock protein of the E. coli dnaJ family; contains a leucine zipper-like motif, binds to non-native substrates for presentation to Ssa3p, may function during protein translocation, assembly and disassembly	III	2.92552	2.34894	2.18741	1.4702	0.744906	-1.95957	-4.28149	0	UGUAUAUUUU		III	II	1763	4	61608	67	286	1	6	0.006	105.348	4.67266	NA
YDR324C	UTP4	Subunit of U3-containing 90S preribosome and SSU processome complexes; involved in production of 18S rRNA and assembly of small ribosomal subunit; member of t-Utp subcomplex involved with transcription of 35S rRNA transcript; Small Subunit processome is also known as SSU processome	III	2.98375	2.60663	2.18055	1.22882	0.241359	-4.28149	0	0	UGUAAAAUAG			II	62281	17	107890	549	17519	62	4	0.136	97.7087	4.33384	nucleolus
YER056C	FCY2	Purine-cytosine permease; mediates purine (adenine, guanine, and hypoxanthine) and cytosine accumulation; relative distribution to the vacuole increases upon DNA replication stress	III	3.28547	2.52264	1.78826	1.06844	0.493896	-1.14473	-3.51692	-3.51692	UGUAAACUAU		II	II	30088	300	46976	349	6927	50	3	0.175	230.405	10.2195	vacuole
YLR305C	STT4	Phosphatidylinositol-4-kinase; functions in the Pkc1p protein kinase pathway; required for normal vacuole morphology, cell wall integrity, and actin cytoskeleton organization	III	4.73031	4.16911	3.21059	1.99029	-0.709563	-3.51692	0	0	UGUAUUUUAC		IV	II	2008	58	4228	55	27	7	6	-0.304	47.9769	2.128	NA
YPL211W	NIP7	Nucleolar protein required for 60S ribosome subunit biogenesis; constituent of 66S pre-ribosomal particles; physically interacts with Nop8p and the exosome subunit Rrp43p	III	3.93504	3.20246	2.35018	1.51219	0.061191	-0.989378	-2.69653	-3.2815	UGUAUAAUAA			II	44473	55	67522	54	16608	2	5	NA	240.744	10.6781	nucleolus,nucleus
YBL076C	ILS1	Cytoplasmic isoleucine-tRNA synthetase; target of the G1-specific inhibitor reveromycin A	III	4.40994	3.09024	1.18704	-0.318856	-1.45436	-3.2815	-3.2815	-3.2815	UGUAUAUGUG	III	II	II	959	182	1686	1060	49	76	5	NA	722.227	32.0341	cytoplasm
YKL216W	URA1	Dihydroorotate dehydrogenase; catalyzes the fourth enzymatic step in the de novo biosynthesis of pyrimidines, converting dihydroorotic acid into orotic acid	III	2.9619	2.48865	2.17225	0.911476	-0.011725	-2.51692	0	0	UGUAAAUUAU			II	47241	19	83390	93	9997	4	2	NA	557.26	24.7171	cytoplasm,nucleus
YNR052C	POP2	RNase of the DEDD superfamily; subunit of the Ccr4-Not complex that mediates 3' to 5' mRNA deadenylation	III	3.39113	2.72139	1.91785	0.681666	-0.185856	-3.51692	0	0	UGUACUAUAU		III	II	2809	5	4693	17	543	1	4	-0.005	53.4285	2.3698	cytoplasm,mitochondrion
YMR086W	SEG1	Component of eisosome required for proper eisosome assembly; precedes Pil1p/Lsp1p during eisosome formation, controls eisosome length and shape; diffusely distributed, forms heterogeneous patches at plasma membrane in small buds, also found in medium and large buds; expression repressed by cAMP; similar to A. gossypii SEG gene and to S. pombe Sle1p, important for generating eisosomes; SEG1 has a …	III	3.13425	2.34596	1.73367	0.871945	-1.95957	-4.28149	0	0	UGUAUUUUAU		III	II	2008	2	4228	124	306	13	7	-0.016	26.8823	1.19235	cell periphery
YDR365C	ESF1	Nucleolar protein involved in pre-rRNA processing; depletion causes severely decreased 18S rRNA levels	III	3.15257	2.47279	2.11871	1.55327	0.950386	-4.28149	-4.28149	-4.28149	UGUACAAUUA		III	II	251	4	9680	66	59	1	9	0.048	146.357	6.4916	nucleolus,nucleus
YKL114C	APN1	Major apurinic/apyrimidinic endonuclease; 3'-repair diesterase; involved in repair of DNA damage by oxidation and alkylating agents; also functions as a 3'-5' exonuclease to repair 7,8-dihydro-8-oxodeoxyguanosine; genetically interacts with NTG1 to maintain mitochondrial genome integrity	III	3.66086	2.61016	1.79034	0.634119	-0.673487	-2.84914	0	0	UGUAGAUUAU			II	5002	239	9834	104	884	8	5	-0.375	52.3031	2.31989	mitochondrion,nucleus
YGR128C	UTP8	Nucleolar protein required for export of tRNAs from the nucleus; also copurifies with the small subunit (SSU) processome containing the U3 snoRNA that is involved in processing of pre-18S rRNA	III	2.96579	2.17561	1.68809	0.695009	-0.064965	0	0	0	UGUAUAAUAC		IV	II	44473	44	67522	79	1878	10	5	0.481	120.152	5.32931	nucleolus
YDL112W	TRM3	2'-O-ribose methyltransferase; catalyzes the ribose methylation of the guanosine nucleotide at position 18 of tRNAs	III	3.27471	3.07801	2.19194	0.965575	-2.51692	0	0	0	UGUAAACUAA		IV	II	30088	33	46976	152	10823	5	5	-0.036	81.2863	3.60543	cytoplasm
YDL227C	HO	Site-specific endonuclease; required for gene conversion at the MAT locus (homothallic switching) through the generation of a ds DNA break; expression restricted to mother cells in late G1 as controlled by Swi4p-Swi6p, Swi5p, and Ash1p	III	2.98082	2.54564	1.54564	0.796782	-0.203218	-1.45436	-2.84914	-4.28149	UGUAUAUUAG		II	II	39923	123	61608	131	10714	2	1	-0.088	69.8576	3.09851	nucleus
YGL049C	TIF4632	Translation initiation factor eIF4G; subunit of the mRNA cap-binding protein complex (eIF4F) that also contains eIF4E (Cdc33p); associates with the poly(A)-binding protein Pab1p, also interacts with eIF4A (Tif1p); TIF4632 has a paralog, TIF4631, that arose from the whole genome duplication	III	3.32437	2.35002	1.46731	0.859225	-0.112475	-3.51692	0	0	UGUAUAUUAC			II	39923	31	61608	96	1713	2	5	-0.421	67.9399	3.01345	cytoplasm
YJL010C	NOP9	Essential subunit of U3-containing 90S preribosome; involved in production of 18S rRNA and assembly of small ribosomal subunit; also part of pre-40S ribosome and required for its export into cytoplasm; binds RNA and contains pumilio domain	III	3.41077	2.8411	2.09818	0.939216	-0.177726	-1.45436	-2.84914	0	UGUAAAUUAU			II	47241	12	83390	77	9997	0	6	0.443	96.2502	4.26915	nucleolus,nucleus
YML028W	TSA1	Thioredoxin peroxidase; acts as both ribosome-associated and free cytoplasmic antioxidant; self-associates to form high-molecular weight chaperone complex under oxidative stress; chaperone activity essential for growth in zinc deficiency; required for telomere length maintenance; protein abundance increases, forms cytoplasmic foci during DNA replication stress; TSA1 has a paralog, TSA2, that aros…	III	4.08912	3.24398	2.6688	1.58873	0.164463	-2.04918	-4.28149	0	UAUAUAAAAC	III	III	II	2209	302	6730	624	504	10	3	NA	2142.28	95.0199	cytoplasm,punctate composite
YGR014W	MSB2	Mucin family member involved in various signaling pathways; functions as osmosensor in the Sho1p-mediated HOG pathway; functions in Cdc42p- and MAP kinase-dependent filamentous growth signaling pathway; processed into secreted and cell-associated forms by aspartyl protease Yps1p; potential Cdc28p substrate	III	3.22328	2.67204	2.42516	0.770832	0.367277	-3.51692	0	0	UGUAUAGUUC		II	II	165	5	5569	830	20	32	3	-0.219	81.6052	3.61957	vacuole
YHR001W	OSH7	Oxysterol-binding protein; part of family with seven members in S. cerevisiae; family members have overlapping, redundant functions in sterol metabolism and collectively perform a function essential for viability; OSH7 has a paralog, OSH6, that arose from the whole genome duplication	III	3.30061	2.52279	2.01261	0.320786	-1.39441	-4.28149	0	0	UGUAAUUUAA		III	II	2397	28	5513	86	856	3	9	0.342	43.2715	1.91929	NA
YOL097C	WRS1	Cytoplasmic tryptophanyl-tRNA synthetase; aminoacylates tryptophanyl-tRNA	III	3.43766	2.73139	1.8451	0.629493	-0.088524	-2.51692	-3.51692	0	UAUACAAUGA		II	II	54	187	225	828	6	17	2	0.049	239.307	10.6144	cytoplasm
YCR003W	MRPL32	Mitochondrial ribosomal protein of the large subunit; protein abundance increases in response to DNA replication stress	III	3.41773	2.79162	1.96967	1.421	-1.09617	-2.84914	-4.28149	0	UGUAUAUUUA	II	IV	II	1763	166	61608	144	576	2	15	-0.368	39.4864	1.75141	mitochondrion
YDL019C	OSH2	Member of an oxysterol-binding protein family with seven members; in S. cerevisiae, family members have overlapping, redundant functions in sterol metabolism and collectively perform a function essential for viability; contains FFAT motif; interacts with ER anchor Scs2p at patches at the plasma membrane and at the nuclear envelope; regulated by sterol binding; OSH2 has a paralog, SWH1, that arose…	III	3.81175	3.38037	2.68488	1.64183	0.45137	-4.28149	0	0	UGUAUUUUAU		IV	II	2008	121	4228	243	306	19	10	-0.239	29.298	1.2995	punctate composite
YER070W	RNR1	Major isoform of large subunit of ribonucleotide-diphosphate reductase; the RNR complex catalyzes rate-limiting step in dNTP synthesis, regulated by DNA replication and DNA damage checkpoint pathways via localization of small subunits; relative distribution to the nucleus increases upon DNA replication stress; RNR1 has a paralog, RNR3, that arose from the whole genome duplication	III	3.53149	3.03057	2.42916	1.96558	-0.559769	0	0	0	UAUACAUAAA		II	II	15	224	46	228	4	20	4	0.111	285.932	12.6824	ambiguous
YJL081C	ARP4	Nuclear actin-related protein involved in chromatin remodeling; component of chromatin-remodeling enzyme complexes	III	3.10931	2.61992	2.216	1.6413	0.284564	-3.51692	-3.51692	0	UGUAAAAUAA		III	II	62281	84	107890	85	20999	11	5	-0.305	74.0896	3.28622	nucleus
YGL148W	ARO2	Bifunctional chorismate synthase and flavin reductase; catalyzes the conversion of 5-enolpyruvylshikimate 3-phosphate (EPSP) to form chorismate, which is a precursor to aromatic amino acids; protein abundance increases in response to DNA replication stress	III	3.32739	2.46197	1.69057	1.40994	0.525278	-1.93196	0	0	UGUAUAUUUA		III	II	1763	22	61608	160	576	6	6	NA	446.149	19.7888	cytoplasm
YJR132W	NMD5	Karyopherin; a carrier protein involved in nuclear import of proteins; importin beta homolog	III	2.52915	1.87586	1.57352	0.899999	0.320786	-4.28149	0	0	UGUAUAUUGA			II	1221	1	61608	37	363	0	5	-0.215	76.7928	3.40612	cytoplasm,nucleus
YKR056W	TRM2	tRNA methyltransferase; 5-methylates the uridine residue at position 54 of tRNAs and may also have a role in tRNA stabilization or maturation; endo-exonuclease with a role in DNA repair	III	4.55581	3.57278	2.75237	1.81163	-0.064965	-1.84914	0	0	UGUACUUUUA	IV	I	II	112	8	1164	60	36	4	6	-0.079	76.813	3.40702	NA
YLR208W	SEC13	Structural component of 3 complexes; subunit of the Nup84p nuclear pore subcomplex that contributes to nucleocytoplasmic transport and NPC biogenesis; subunit of the COPII vesicle coat required for ER-to-Golgi transport; subunit of SEACAT, a subcomplex of the coatomer-related, vacuolar-associated SEA complex, that inhibits the TORC1 inhibitory role of SEACIT (Iml1p-Npr2p-Npr3p), a GAP for Gtr1p, …	III	2.14401	1.57083	1.09631	0.999492	0.150861	-1.09617	-3.51692	0	UGUACAGUAA			II	109	60	220	152	26	5	5	NA	209.252	9.28131	ER to Golgi
YDL140C	RPO21	RNA polymerase II largest subunit B220; part of central core; phosphorylation of C-terminal heptapeptide repeat domain regulates association with transcription and splicing factors; similar to bacterial beta-prime	III	2.33681	1.61732	1.26611	0.137131	-1.31886	-2.84914	0	0	UGUAUCAUAA			II	3621	4	4458	23	1759	0	4	-0.16	142.982	6.3419	nucleus
YIR030W-A		Dubious open reading frame; unlikely to encode a functional protein, based on available experimental and comparative sequence data; overlaps ORF DAL7/YIR031C	III	2.48752	1.78203	0.992725	-0.135909	-0.374604	-4.28149	0	0	UGUACAUCCG	IV		III	27	1	140	19	2	0	#N/A	NA	0.802573	0.0355978	NA
YBL002W	HTB2	Histone H2B; core histone protein required for chromatin assembly and chromosome function; nearly identical to HTB1; Rad6p-Bre1p-Lge1p mediated ubiquitination regulates reassembly after DNA replication, transcriptional activation, meiotic DSB formation and H3 methylation	III	2.56072	1.639	1.22234	-0.011725	-1.67349	-2.51692	-3.51692	-3.51692	UGUAUAUAUA		II	II	2078	19	11790	6	695	0	8	NA	1044.94	46.3478	nucleus
YER025W	GCD11	Gamma subunit of the translation initiation factor eIF2; involved in the identification of the start codon; binds GTP when forming the ternary complex with GTP and tRNAi-Met; mutations in human ortholog cause X-linked intellectual disability (XLID)	III	2.86363	1.66767	0.896153	0.535782	-1.21149	-2.39441	0	0	UGUAUAUUUA			II	1763	4	61608	12	576	2	10	NA	362.533	16.08	cytoplasm
YEL054C	RPL12A	Ribosomal 60S subunit protein L12A; rpl12a rpl12b double mutant exhibits slow growth and slow translation; homologous to mammalian ribosomal protein L12 and bacterial L11; RPL12A has a paralog, RPL12B, that arose from the whole genome duplication	III	2.98466	2.27406	1.21309	-0.246069	-2.39441	-2.39441	-2.39441	-3.51692	UGUAUUUUAA	IV	II	II	2008	296	4228	104	766	0	4	NA	2193.57	97.2952	cytoplasm
YJR140C	HIR3	Subunit of the HIR complex; a nucleosome assembly complex involved in regulation of histone gene transcription; involved in position-dependent gene silencing and nucleosome reassembly; ortholog of human CABIN1 protein	III	1.63181	1.42367	1.21273	0.570545	0.570545	0	0	0	UGUAAAUAUU	IV		III	4004	789	18934	1468	844	152	8	-0.422	26.5857	1.1792	nucleus
YOR309C		Dubious open reading frame; unlikely to encode a functional protein, based on available experimental and comparative sequence data; partially overlaps the verified gene NOP58	III	2.13387	1.48594	1.20963	0.867564	0.010622	-0.721332	-1.67349	-4.28149	UGUACCAUUA			II	342	158	3660	173	90	8	#N/A	NA	96.8483	4.29567	NA
YNR060W	FRE4	Ferric reductase; reduces a specific subset of siderophore-bound iron prior to uptake by transporters; expression induced by low iron levels	III	1.57324	1.25379	0.895703	0.813668	-0.177726	-2.69653	0	0	UGUAUAAUAU		II	II	44473	19	67522	48	9264	0	4	-0.36	7.6253	0.338218	NA
YDR201W	SPC19	Essential subunit of the Dam1 complex (aka DASH complex); complex couples kinetochores to the force produced by MT depolymerization thereby aiding in chromosome segregation; also localized to nuclear side of spindle pole body	III	2.60164	2.31918	1.39029	0.434939	-1.19499	-3.51692	0	0	UGUAUUAUAA	IV	I	II	4942	1	7959	54	2104	1	2	-0.375	28.5783	1.26758	spindle pole
YJL050W	MTR4	ATP-dependent 3'-5' RNA helicase of the DExD/H family; involved in nuclear RNA processing and degradation both as a component of TRAMP complex and in TRAMP-independent processes; TRAMP unwinds RNA duplexes, with Mtr4p unwinding activity stimulated by Pap2p/Air2p but not dependent on ongoing polyadenylation; contains an arch domain, with two coiled-coil arms/stalks and a globular fist/KOW domain, …	III	2.06653	1.23832	0.672176	-0.318856	-0.59308	0	0	0	UAUAUAAUAA			III	1181	239	4212	393	535	5	5	-0.434	139.438	6.18472	nucleolus,nucleus
YDL100C	GET3	Guanine nucleotide exchange factor for Gpa1p; amplifies G protein signaling; functions as a chaperone under ATP-depleted oxidative stress conditions; subunit of GET complex, involved in ATP dependent Golgi to ER trafficking and insertion of tail-anchored (TA) proteins into ER membrane under non-stress conditions; binds as dimer to transmembrane domain (TMD) cargo, shielding TMDs from aqueous solv…	III	1.63181	0.681144	0.222336	0.157303	0.039619	-2.69653	-3.2815	0	UGUGUGAAAA		III	II	28	654	75	329	3	10	3	NA	418.219	18.55	ER
YOR312C	RPL2B	Ribosomal 60S subunit protein L20B; homologous to mammalian ribosomal protein L18A, no bacterial homolog; RPL20B has a paralog, RPL20A, that arose from the whole genome duplication	III	2.38892	1.52	0.800902	-0.169642	-0.485302	-2.14473	-2.84914	0	UGUAUAAUUC		IV	II	2580	1665	67522	6836	155	962	5	NA	1455.45	64.556	cytoplasm
YOR311C	DGK1	Diacylglycerol kinase; localized to the endoplasmic reticulum (ER); overproduction induces enlargement of ER-like membrane structures and suppresses a temperature-sensitive sly1 mutation; contains a CTP transferase domain	III	1.68835	0.672176	0.356121	-0.203218	-0.203218	0	0	0	UGUAAAUUAU			II	47241	1	83390	4350	9997	8000	5	-0.178	54.1215	2.40054	ER
YJL186W	MNN5	Alpha-1,2-mannosyltransferase; responsible for addition of the second alpha-1,2-linked mannose of the branches on the mannan backbone of oligosaccharides, localizes to an early Golgi compartment	III	2.6814	1.75368	1.22576	0.493896	-0.291257	-3.2815	0	0	UGUAUAAUAU		IV	II	44473	983	67522	26	9264	6	5	0.319	116.011	5.14563	punctate composite
YJR133W	XPT1	Xanthine-guanine phosphoribosyl transferase; required for xanthine utilization and for optimal utilization of guanine	III	2.05755	1.97128	0.842867	0	0	0	0	0	UGUAUAUAGA	III	II	III	1090	204	11790	181	620	4	4	-0.283	72.3348	3.20839	cytoplasm
YDL179W	PCL9	Cyclin; forms a functional kinase complex with Pho85p cyclin-dependent kinase (Cdk), expressed in late M/early G1 phase, activated by Swi5p; PCL9 has a paralog, PCL2, that arose from the whole genome duplication	III	2.3091	1.67244	1.31215	0.600872	0.55111	-3.2815	-3.2815	0	UGUACAAUAU			II	5820	1	9680	14	1189	1	3	-0.412	31.7947	1.41024	NA
YOR293W	RPS1A	Protein component of the small (40S) ribosomal subunit; homologous to mammalian ribosomal protein S10, no bacterial homolog; RPS10A has a paralog, RPS10B, that arose from the whole genome duplication	III	2.5944	1.979	0.879756	-0.120244	-1.51692	-2.51692	-3.51692	-3.51692	UGUAUAUUUU		IV	II	1763	6	61608	77	286	0	3	NA	1152.64	51.1251	nucleolus,nucleus
YHR011W	DIA4	Probable mitochondrial seryl-tRNA synthetase; mutant displays increased invasive and pseudohyphal growth	III	2.70299	1.76004	0.749176	0.157303	-1.14473	0	0	0	UGUAAUCUUA	II	III	II	451	30	2371	344	130	9	14	-0.114	12.0118	0.532778	mitochondrion,punctate composite
YDR091C	RLI1	Essential Fe-S protein; required for ribosome biogenesis, translation initiation/termination; facilitates binding of multifactor complex (MFC) of initiation factors to small ribosomal subunit; Dom34-Hbs1 complex and Rli1p work in dissociating inactive ribosomes, thereby facilitating translation restart; forms complex with Lto1p and Yae1p; dependency on ROS-labile FeS clusters, activity in nuclear…	III	2.49912	1.8957	1.30569	0.629493	-0.603932	-2.39441	0	0	UGUAUUUUAA		II	II	2008	8	4228	20	766	0	6	0.123	234.747	10.4121	cytoplasm
YOL120C	RPL18A	Ribosomal 60S subunit protein L18A; intron of RPL18A pre-mRNA forms stem-loop structures that are a target for Rnt1p cleavage leading to degradation; homologous to mammalian ribosomal protein L18, no bacterial homolog; RPL18A has a paralog, RPL18B, that arose from the whole genome duplication	III	1.38756	1.27867	0.749176	0.418318	-0.945695	-2.14473	-2.51692	-3.51692	UAUAUAAAAC	IV	II	II	2209	4	6730	36	504	0	9	NA	945.938	41.9568	NA
YKL196C	YKT6	Vesicle membrane protein (v-SNARE) with acyltransferase activity; involved in trafficking to and within the Golgi, endocytic trafficking to the vacuole, and vacuolar fusion; membrane localization due to prenylation at the carboxy-terminus	III	1.91148	1.3147	0.883646	0.157303	0.157303	-0.346993	0	0	UGUAAUUUAG		III	III	2397	13269	5513	1206	727	331	0	NA	211.295	9.3719	NA
YBR278W	DPB3	Third-largest subunit of DNA polymerase II (DNA polymerase epsilon); required to maintain fidelity of chromosomal replication and also for inheritance of telomeric silencing; stabilizes the interaction of Pol epsilon with primer-template DNA, positively affecting the processivity of the polymerase and exonuclease activities of Pol epsilon; mRNA abundance peaks at the G1/S boundary of the cell cyc…	III	1.22576	1.03263	0.995902	0.290437	-0.516918	0	0	0	UGUAGGUUAG		II	III	21	394	75	386	2	7	7	-0.098	23.8234	1.05668	cytoplasm,nucleus
YCR046C	IMG1	Mitochondrial ribosomal protein of the large subunit; required for respiration and for maintenance of the mitochondrial genome	III	2.69846	0.961901	0.770832	-0.454364	-1.19499	-3.51692	0	0	UGUAUAUAAG	I		II	5022	18	11790	266	674	94	14	-0.186	48.3089	2.14273	mitochondrion
YKL156W	RPS27A	Protein component of the small (40S) ribosomal subunit; homologous to mammalian ribosomal protein S27, no bacterial homolog; RPS27A has a paralog, RPS27B, that arose from the whole genome duplication; protein abundance increases in response to DNA replication stress	III	2.41128	2.01062	1.11005	0.770832	-0.203218	-1.93196	-3.51692	-3.51692	UGUAGAAUAU		I	II	9009	113	15995	796	1870	21	5	NA	500.012	22.1779	cytoplasm
YKL051W	SFK1	Plasma membrane protein that may act to generate normal levels of PI4P; may act together with or upstream of Stt4p; at least partially mediates proper localization of Stt4p to the plasma membrane	III	2.06482	1.37038	0.851301	0.434939	0.130598	-2.51692	0	0	UGUAUAGUAG			II	3732	57	5569	7	872	1	10	0.504	17.261	0.765608	cell periphery
YJL033W	HCA4	DEAD box RNA helicase; component of the SSU; interacts with Bfr2p and Enp2p; high-copy number suppression of a U14 snoRNA processing mutant suggests an involvement in 18S rRNA synthesis	III	3.06462	2.18843	0.875399	0	0	0	0	0	UGUAUACAUC			II	28	6	301	24	4	18	4	-0.052	120.063	5.32538	nucleolus
YGR119C	NUP57	FG-nucleoporin component of central core of the nuclear pore complex; contributes directly to nucleocytoplasmic transport and maintenance of the nuclear pore complex (NPC) permeability barrier; found in stable complex with Nic96p and two other FG-nucleoproteins (Nsp1p and Nup49p)	III	1.76873	1.26013	0.089198	-1.14473	-1.14473	-1.45436	-1.93196	0	UGUAUAAAGA		II	II	693	165	10809	137	274	107	7	-0.265	75.4073	3.34467	nuclear periphery
YKR057W	RPS21A	Protein component of the small (40S) ribosomal subunit; homologous to mammalian ribosomal protein S21, no bacterial homolog; RPS21A has a paralog, RPS21B, that arose from the whole genome duplication	III	1.49135	1.16409	0.753434	0.384492	-1.03442	-1.93196	0	0	UGUAUUUUUA		II	II	479	4	4228	12	196	3	6	NA	670.993	29.7617	cytoplasm
YBL007C	SLA1	Cytoskeletal protein binding protein; required for assembly of the cortical actin cytoskeleton; interacts with proteins regulating actin dynamics and proteins required for endocytosis; found in the nucleus and cell cortex; has 3 SH3 domains	III	2.06844	1.37347	-0.237594	-1.26418	-1.60393	-2.14473	-2.14473	-2.51692	UGUAUUUUAC		III	II	2008	561	4228	677	27	28	8	-0.2	140.985	6.25334	cytoplasm,actin
YOR323C	PRO2	Gamma-glutamyl phosphate reductase; catalyzes the second step in proline biosynthesis	III	2.90766	2.33698	1.38723	-0.559769	-1.19499	-1.19499	0	0	UGUAUACAUA	IV	II	II	28	6	301	68	10	0	8	-0.055	242.153	10.7406	cytoplasm,nucleus
YLL014W	EMC6	Member of conserved ER transmembrane complex; required for efficient folding of proteins in the ER; null mutant displays induction of the unfolded protein response; homologous to worm F33D4.7/EMC-6, fly CG11781, human TMEM93	III	1.94853	1.25078	0.809584	0.36171	-0.889953	0	0	0	UGUACAGUAA			II	109	519	220	1093	26	41	7	NA	152.576	6.76744	ER
YDL122W	UBP1	Ubiquitin-specific protease; removes ubiquitin from ubiquitinated proteins; cleaves at the C terminus of ubiquitin fusions irrespective of their size; capable of cleaving polyubiquitin chains	III	2.41698	1.64871	0.658088	0.010622	-1.26418	-2.51692	0	0	UGUAAAUAAC			II	6864	175	18934	51	1061	37	6	-0.17	100.228	4.44557	cytoplasm
YFL045C	SEC53	Phosphomannomutase; involved in synthesis of GDP-mannose and dolichol-phosphate-mannose; required for folding and glycosylation of secretory proteins in the ER lumen	III	1.53025	0.911476	0.367277	-0.255594	-0.346993	-1.93196	0	0	UGUACUCUUA	IV	I	II	59	6	486	29	17	0	8	NA	788.453	34.9716	cytoplasm,nucleus
YBR106W	PHO88	Probable membrane protein; involved in phosphate transport; role in the maturation of secretory proteins; pho88 pho86 double null mutant exhibits enhanced synthesis of repressible acid phosphatase at high inorganic phosphate concentrations	III	2.32079	1.48082	0.834853	-0.684963	-1.21149	-2.14473	-2.84914	0	UGUACAAAAA		II	II	538	8	1294	27	115	0	8	NA	934.533	41.4509	ER
YKL057C	NUP12	Subunit of the Nup84p subcomplex of the nuclear pore complex (NPC); contributes to nucleocytoplasmic transport and NPC biogenesis and is involved in establishment of a normal nucleocytoplasmic concentration gradient of the GTPase Gsp1p; also plays roles in several processes that may require localization of genes or chromosomes at the nuclear periphery, including double-strand break repair, transc…	III	1.95843	1.21	0.499569	-0.327824	-1.09617	0	0	0	UGUAAAUUAA			II	47241	911	83390	2300	16322	37	4	0.113	65.8296	2.91985	NA
YBL039C	URA7	Major CTP synthase isozyme (see also URA8); catalyzes the ATP-dependent transfer of the amide nitrogen from glutamine to UTP, forming CTP, the final step in de novo biosynthesis of pyrimidines; involved in phospholipid biosynthesis; capable of forming cytoplasmic filaments termed cytoophidium, especially during conditions of glucose depletion; URA7 has a paralog, URA8, that arose from the whole g…	III	1.58817	1.41263	1.11005	0.681144	0.068044	-0.931956	-2.51692	-3.51692	UGUAUAUUAU			II	39923	31	61608	183	7219	3	7	NA	377.14	16.7279	cytoplasm
YCL027W	FUS1	Membrane protein localized to the shmoo tip; required for cell fusion; expression regulated by mating pheromone; proposed to coordinate signaling, fusion, and polarization events required for fusion; potential Cdc28p substrate	III	2.08771	1.04698	0.783865	0.061191	-0.516918	-3.51692	0	0	UGUACUUAUA		III	II	83	752	250	143	34	1	4	-0.473	24.1868	1.0728	vacuole
YLR369W	SSQ1	Mitochondrial hsp70-type molecular chaperone; required for assembly of iron/sulfur clusters into proteins at a step after cluster synthesis, and for maturation of Yfh1p, which is a homolog of human frataxin implicated in Friedreich's ataxia	III	1.92541	1.27867	1.16089	0.809584	0.629493	-2.14473	0	0	UGUAUAUUAA			II	39923	20623	61608	22150	16718	3425	12	0.002	23.6832	1.05046	mitochondrion
YGR081C	SLX9	Protein required for pre-rRNA processing; associated with the 90S pre-ribosome and 43S small ribosomal subunit precursor; interacts with U3 snoRNA; deletion mutant has synthetic fitness defect with an sgs1 deletion mutant	III	1.76452	1.57593	1.13751	0.266106	-0.034425	-3.2815	-3.2815	-4.28149	UGUACAGUUC		II	II	12	8	220	138	1	18	4	-0.243	99.2968	4.40427	nucleolus,nucleus
YJR041C	URB2	Protein required for normal metabolism of the rRNA primary transcript; nucleolar protein; proposed to be involved in ribosome biogenesis	III	2.2179	1.05085	0.429627	0.164463	-0.433724	-4.28149	0	0	UGUAUCAUAU			II	3621	17651	4458	1143	843	50	8	-0.008	61.0878	2.70953	nucleolus
YPL012W	RRP12	Protein required for export of the ribosomal subunits; associates with the RNA components of the pre-ribosomes; has a role in nuclear import in association with Pse1p; also plays a role in the cell cycle and the DNA damage response; contains HEAT-repeats	III	1.82001	1.58072	1.07186	0.695009	-0.945695	-1.39441	-1.77082	-4.28149	UGUAUAUUAA			II	39923	71	61608	1742	16718	264	9	-0.246	188.084	8.34239	cytoplasm,nucleus
YDR419W	RAD3	DNA polymerase eta; involved in translesion synthesis during post-replication repair; catalyzes the synthesis of DNA opposite cyclobutane pyrimidine dimers and other lesions; involved in formation of post-replicative damage-induced genome-wide cohesion; may also have a role in protection against mitochondrial mutagenesis; mutations in human pol eta are responsible for XPV	III	0.338562	0.338562	0.338562	-0.38502	-0.38502	-0.38502	0	0	UGUACAAUAU			III	5820	18	9680	263	1189	6	2	-0.258	15.2571	0.676723	cytoplasm,nucleus
YDR507C	GIN4	Protein kinase involved in bud growth and assembly of the septin ring; proposed to have kinase-dependent and kinase-independent activities; undergoes autophosphorylation; similar to Hsl1p; GIN4 has a paralog, KCC4, that arose from the whole genome duplication	III	2.76885	2.23832	0.826321	0.061191	-1.77082	-2.84914	0	0	UGUACUAUUA			II	170	2	4693	60	42	3	5	-0.003	58.8693	2.61113	ambiguous,bud neck,cytoplasm,bud
YCR030C	SYP1	Negative regulator of WASP-Arp23 complex; involved in endocytic site formation; directly inhibits Las17p stimulation of Arp23 complex-mediated actin assembly in vitro; may regulate assembly and disassembly of the septin ring; colocalizes and interacts with septin subunits; potential role in actin cytoskeletal organization	III	2.42383	1.73582	1.61993	1.39879	-0.649489	-2.2815	0	0	UGUACUAUAA		IV	II	2809	515	4693	202	1131	49	7	-0.143	23.4171	1.03866	bud neck,cell periphery,punctate composite
YGR162W	TIF4631	Translation initiation factor eIF4G; subunit of the mRNA cap-binding protein complex (eIF4F) that also contains eIF4E (Cdc33p); interacts with Pab1p and with eIF4A (Tif1p); also has a role in biogenesis of the large ribosomal subunit; TIF4631 has a paralog, TIF4632, that arose from the whole genome duplication	III	3.22959	2.55449	0.842867	-0.011725	-0.454364	0	0	0	UGGAUACAAG		IV	II	3	12	6	35	1	1	5	-0.129	396.495	17.5864	cytoplasm
YCR035C	RRP43	Exosome non-catalytic core component; involved in 3'-5' RNA processing and degradation in both the nucleus and the cytoplasm; has similarity to E. coli RNase PH and to human hRrp43p (OIP2, EXOSC8); protein abundance increases in response to DNA replication stress	III	1.88775	0.961901	0.883646	0.177196	-0.144732	-1.77082	0	0	UGUAAUAUAU		IV	II	15767	1147	25034	643	2595	8	6	-0.039	80.354	3.56408	nucleolus,nucleus
YOR232W	MGE1	Mitochondrial matrix cochaperone; nucleotide release factor for Ssc1p in protein translocation and folding; also acts as cochaperone for Ssq1p in folding of Fe-S cluster proteins; acts as oxidative sensor to regulate mitochondrial Ssc1p; in presence of oxidative stress, dimeric Mge1p becomes a monomer and unable to regulate Ssc1p function; homolog of E. coli GrpE and human Mge1 (GRPEL1), which al…	III	1.94853	1.03613	0.708743	0.53025	-0.709563	-3.51692	-3.51692	0	UGUAAACUAA	II		II	30088	245	46976	2300	10823	111	14	-0.623	315.913	14.0122	cytoplasm
YDR157W		Dubious open reading frame; unlikely to encode a functional protein, based on available experimental and comparative sequence data	III	1.66515	1.14763	0.624853	-0.088524	-0.485302	-1.51692	0	0	UGUGAACUGG			II	66	907	934	1804	4	164	#N/A	NA	7.36332	0.326598	NA
YOR145C	PNO1	Essential nucleolar protein required for pre-18S rRNA processing; interacts with Dim1p, an 18S rRNA dimethyltransferase, and also with Nob1p, which is involved in proteasome biogenesis; contains a KH domain	III	2.71774	1.89162	1.15409	0.302789	-1.45436	-3.2815	0	0	UGUAUAAUAU			II	44473	7	67522	10	9264	0	6	-0.465	206.336	9.15198	NA
YMR031C	EIS1	Component of the eisosome required for proper eisosome assembly; similar to Uso1p; authentic, non-tagged protein is detected in a phosphorylated state in highly purified mitochondria in high-throughput studies; protein increases in abundance and relocalizes from plasma membrane to cytoplasm upon DNA replication stress; EIS1 has a paralog, YKL050C, that arose from the whole genome duplication	III	1.66741	1.39029	0.867564	0.509672	-0.721332	0	0	0	UGUAUAAUAU			II	44473	852	67522	1690	9264	211	1	-0.042	30.3869	1.3478	punctate composite
YJL138C	TIF2	Translation initiation factor eIF4A; DEA(D/H)-box RNA helicase that couples ATPase activity to RNA binding and unwinding; forms a dumbbell structure of two compact domains connected by a linker; interacts with eIF4G; protein abundance increases in response to DNA replication stress; TIF2 has a paralog, TIF1, that arose from the whole genome duplication	III	2.70079	2.02519	1.50433	0.813668	-0.673487	-1.67349	-2.84914	-4.28149	UGUACAAUAA			I	5820	141	9680	82	2141	3	7	NA	202.08	8.96319	cytoplasm
YHR170W	NMD3	Protein involved in nuclear export of the large ribosomal subunit; acts as a Crm1p-dependent adapter protein for export of nascent ribosomal subunits through the nuclear pore complex	III	2.78918	1.66262	1.21273	0.788022	-0.889953	-1.45436	-4.28149	0	UGUACUUUAU		III	II	450	10	1164	200	63	25	7	NA	245.531	10.8904	cytoplasm
YOR027W	STI1	Hsp90 cochaperone; regulates spatial organization of amyloid-like proteins in the cytosol, thereby buffering the proteotoxicity caused by amyloid-like proteins; interacts with the Ssa group of the cytosolic Hsp70 chaperones and activates Ssa1p ATPase activity; interacts with Hsp90 chaperones and inhibits their ATPase activity; homolog of mammalian Hop	III	2.0541	0.575925	0.434939	-0.684963	-1.93196	-1.93196	-1.93196	0	UGUAUUUUCU			III	82	130	4228	233	22	9	11	NA	284.314	12.6107	cytoplasm
YDR322W	MRPL35	Mitochondrial ribosomal protein of the large subunit	III	2.2696	1.55355	1.04739	-0.072482	-0.537577	-2.51692	-2.51692	0	UGUACAUAUA	I		II	144	16	746	61	51	0	14	0.077	50.3294	2.23234	mitochondrion
YJL123C	MTC1	Protein of unknown function that may interact with ribosomes; green fluorescent protein (GFP)-fusion protein localizes to the cytoplasm and to COPI-coated vesicles (early Golgi); mtc1 is synthetically lethal with cdc13-1	III	1.13751	0.891846	0.590834	-0.096165	-0.931956	0	0	0	UGUAUAAAGU			III	693	49	10809	619	219	14	8	-0.21	55.4235	2.45829	cytoplasm,Golgi,early Golgi
YGR037C	ACB1	Acyl-CoA-binding protein; transports newly synthesized acyl-CoA esters from fatty acid synthetase (Fas1p-Fas2p) to acyl-CoA-consuming processes; subject to starvation-induced, Grh1p-mediated unconventional secretion; protein abundance increases in response to DNA replication stress	III	2.06462	1.65782	1.12365	-0.796941	-1.19499	-1.93196	0	0	UGUACAUUUA	III	II	II	110	2	5067	396	26	65	3	NA	863.369	38.2945	cytoplasm,nucleus
YPL085W	SEC16	COPII vesicle coat protein required for ER transport vesicle budding; essential factor in endoplasmic reticulum exit site (ERES) formation, as well as in COPII-mediated ER-to-Golgi traffic; bound to periphery of ER membranes and may act to stabilize initial COPII complexes; interacts with Sec23p, Sec24p and Sec31p	III	2.37453	1.70189	0.662623	0.384492	-0.203218	-3.51692	0	0	UGUAUAUUAU			II	39923	2	61608	133	7219	27	4	-0.499	46.353	2.05597	ER to Golgi
YFL001W	DEG1	tRNA:pseudouridine synthase; introduces pseudouridines at position 38 or 39 in tRNA; also responsible for pseudouracil modification of some mRNAs; important for maintenance of translation efficiency and normal cell growth, localizes to both the nucleus and cytoplasm; non-essential for viability	III	1.49419	1.34455	0.899999	0.296967	-1.53758	-2.2815	-3.2815	-4.28149	UGUAUAAUAU			II	44473	1	67522	9	9264	2	6	-0.206	45.1196	2.00127	nucleus
YEL021W	URA3	Orotidine-5'-phosphate (OMP) decarboxylase; catalyzes the sixth enzymatic step in the de novo biosynthesis of pyrimidines, converting OMP into uridine monophosphate (UMP); converts 5-FOA into 5-fluorouracil, a toxic compound	III	1.60794	1.29697	0.766625	-0.300054	-1.67349	0	0	0	UGUAUACUAA		IV	II	7713	315	10458	757	3109	28	5	NA	0.117289	0.00520233	NA
YMR061W	RNA14	Component of the cleavage and polyadenylation factor I (CF I); CF 1, composed of the CF 1A complex (Rna14p, Rna15p, Clp1p, Pcf11p) and Hrp1, is involved in cleavage and polyadenylation of mRNA 3' ends; bridges interaction between Rna15p and Hrp1p in the CF I complex; mutant displays reduced transcription elongation in the G-less-based run-on (GLRO) assay; required for gene looping and maintenance…	III	2.216	0.891846	0.456602	0.150861	-0.096165	0	0	0	UGUAUGUAAU			III	1426	1237	2493	516	138	31	7	-0.024	47.7274	2.11694	nucleus
YBR017C	KAP14	Transportin or cytosolic karyopherin beta 2; functions in the rg-nuclear localization signal-mediated nuclear import/reimport of mRNA-binding proteins Nab2p and Hrp1p; regulates asymmetric protein synthesis in daughter cells during mitosis	III	2.25546	1.4566	1.40994	0.45137	-0.770819	-3.51692	0	0	UGUAUAGUUU			II	165	3	5569	1346	16	286	9	-0.056	91.9624	4.07896	cytoplasm,nucleus
YHR137W	ARO9	Aromatic aminotransferase II; catalyzes the first step of tryptophan, phenylalanine, and tyrosine catabolism	III	2.39182	1.87586	1.13751	0.209996	-0.945695	-3.51692	0	0	UGUAUAAAAG	IV	III	II	4606	32	10809	24	805	0	3	0.628	27.4898	1.2193	cytoplasm,nucleus
YOR004W	UTP23	Component of the small subunit processome; involved in 40S ribosomal subunit biogenesis; interacts with snR30 and is required for dissociation of snR30 from large pre-ribosomal particles; has homology to PINc domain protein Fcf1p, although the PINc domain of Utp23p is not required for function; essential protein	III	2.32508	1.93504	1.4455	-0.796941	-1.67349	-2.51692	-3.51692	-3.51692	UGUACAUAUG	III	IV	II	144	2	746	19	23	0	2	-0.137	105.629	4.68512	mitochondrion
YML113W	DAT1	DNA binding protein that recognizes oligo(dA).oligo(dT) tracts; Arg side chain in its N-terminal pentad Gly-Arg-Lys-Pro-Gly repeat is required for DNA-binding; relocalizes to the cytosol in response to hypoxia; not essential for viability	III	2.40708	1.62226	1.18704	0.867564	-0.559769	-4.28149	0	0	UGUAUAUUUA		II	II	1763	82	61608	550	576	52	5	-0.271	34.705	1.53933	nucleus
YDL070W	BDF2	Protein involved in transcription initiation; acts at TATA-containing promoters; associates with the basal transcription factor TFIID; contains two bromodomains; corresponds to the C-terminal region of mammalian TAF1; redundant with Bdf1p; protein abundance increases in response to DNA replication stress; BDF2 has a paralog, BDF1, that arose from the whole genome duplication	III	2.42516	1.96006	0.859225	-0.673487	-0.796941	-1.51692	-3.51692	0	UGUAAAUAAA	IV	I	II	6864	1	18934	404	2025	62	6	0.374	89.1663	3.95494	cytoplasm,nucleus
YNL111C	CYB5	Cytochrome b5; involved in the sterol and lipid biosynthesis pathways; acts as an electron donor to support sterol C5-6 desaturation	III	1.67442	1.28162	0.935035	0.867564	0.302789	0.061191	-2.51692	-3.51692	UGUAUCAUAG		IV	I	3621	2400	4458	608	424	168	4	-0.808	175.881	7.80114	ER
YNL079C	TPM1	Major isoform of tropomyosin; binds to and stabilizes actin cables and filaments, which direct polarized cell growth and the distribution of several organelles; acetylated by the NatB complex and acetylated form binds actin most efficiently; TPM1 has a paralog, TPM2, that arose from the whole genome duplication	III	1.73582	1.27867	1.05431	0.717996	-0.696532	-1.69653	0	0	UGUAUACUUU			II	513	107	10458	436	83	80	5	NA	509.487	22.5981	NA
YMR131C	RRB1	Nuclear protein involved in early steps of ribosome biogenesis; physically interacts with the ribosomal protein Rpl3p; essential gene	III	3.00407	1.939	0.958216	-0.169642	-2.51692	0	0	0	UGUAUAAUAC			II	44473	296	67522	756	1878	124	6	NA	328.046	14.5504	nucleolus,nucleus
YNL273W	TOF1	Subunit of a replication-pausing checkpoint complex; Tof1p-Mrc1p-Csm3p acts at the stalled replication fork to promote sister chromatid cohesion after DNA damage, facilitating gap repair of damaged DNA; interacts with the MCM helicase; relocalizes to the cytosol in response to hypoxia	III	1.96945	1.48052	1.13713	0.203059	-0.796941	0	0	0	UGUAAUUUUA		III	II	875	2045	5513	2420	292	393	5	-0.439	15.6402	0.693717	nucleus
YER032W	FIR1	Protein involved in 3' mRNA processing; interacts with Ref2p; APCC(Cdh1) substrate; potential Cdc28p substrate	III	2.00307	1.52499	1.2875	0.585509	-0.673487	-1.51692	0	0	UGUACUUUUA			III	112	1382	1164	1574	36	269	3	0.07	18.3662	0.814626	bud neck
YER165W	PAB1	Poly(A) binding protein; part of the 3'-end RNA-processing complex, mediates interactions between the 5' cap structure and the 3' mRNA poly(A) tail, involved in control of poly(A) tail length, interacts with translation factor eIF-4G; stimulates, but is not required for the deadenylation activity of the Pan2p-Pan3p poly(A)-ribonuclease complex	III	2.40859	1.57593	1.35018	0.068843	-2.14473	0	0	0	UGUAACCUAA		II	II	1538	270	3581	72	512	4	5	NA	1025.6	45.4903	cytoplasm
YNL216W	RAP1	Essential DNA-binding transcription regulator that binds many loci; involved in transcription activation and repression, chromatin silencing, and telomere length maintenance; relocalizes to the cytosol in response to hypoxia; conserved protein with an N-terminal BRCT domain, a central region with homology to the Myb DNA binding domain, and a C-terminal Rap1-specific protein-interaction domain (RC…	III	2.71787	2.13732	0.995902	0.658088	0.241359	-1.77082	-2.39441	-3.51692	UGUAUAAUUU			II	2580	10	67522	49	391	4	4	-0.177	60.4756	2.68238	nucleus
YBR009C	HHF1	Histone H4; core histone protein required for chromatin assembly and chromosome function; one of two identical histone proteins (see also HHF2); contributes to telomeric silencing; N-terminal domain involved in maintaining genomic integrity	III	1.94087	1.03613	0.53025	-0.144732	-1.14473	-2.14473	0	0	UGUACAAUUA		II	II	251	144	9680	22150	59	2823	5	NA	847.622	37.596	nucleus
YJL092W	SRS2	DNA helicase and DNA-dependent ATPase; involved in DNA repair and checkpoint recovery, needed for proper timing of commitment to meiotic recombination and transition from Meiosis I to II; blocks trinucleotide repeat expansion; affects genome stability; disassembles Rad51p nucleoprotein filaments during meiotic recombination; functional homolog of human RTEL1	III	1.62949	0.349854	0.247409	-0.057487	-0.516918	-0.709563	0	0	UGUAUACGA0		III	III	106	40	273	187	0	5	8	-0.389	28.8102	1.27787	nucleus
YIL127C	RRT14	Putative protein of unknown function; identified in a screen for mutants with decreased levels of rDNA transcription; green fluorescent protein (GFP)-fusion protein localizes to the nucleolus; predicted to be involved in ribosome biogenesis	III	3.1574	2.13569	1.21926	-0.527211	-1.14473	-1.67349	-2.51692	0	UGUACAAGAU		II	II	41	2	112	82	11	2	5	-0.382	85.5724	3.79554	nucleolus
YGR009C	SEC9	t-SNARE protein required for secretory vesicle-plasma membrane fusion; similar to but not functionally redundant with Spo20p; interacts non-exocyst bound Sec6p; SNAP-25 homolog	III	2.13732	1.5175	1.27867	0.818215	-1.11157	-4.28149	0	0	UGUAAUAUAU			II	15767	55	25034	246	2595	26	8	0.21	24.3569	1.08034	NA
YOL012C	HTZ1	Histone variant H2AZ; exchanged for histone H2A in nucleosomes by the SWR1 complex; involved in transcriptional regulation through prevention of the spread of silent heterochromatin; Htz1p-containing nucleosomes facilitate RNA Pol II passage by affecting correct assembly and modification status of RNA Pol II elongation complexes and by favoring efficient nucleosome remodeling	III	1.42963	0.713632	0.164463	-0.103847	-1.47414	-1.47414	0	0	UGUAAUCUAU		I	II	1070	4	2371	29	148	3	3	0.119	134.271	5.95553	nucleus
YKL068W	NUP1	FG-nucleoporin component of central core of the nuclear pore complex; contributes directly to nucleocytoplasmic transport and maintenance of the nuclear pore complex (NPC) permeability barrier and is involved in gene tethering at the nuclear periphery; NUP100 has a paralog, NUP116, that arose from the whole genome duplication	III	2.54578	2.14763	1.75793	0.717996	-1.16067	-1.95957	-4.28149	-4.28149	UAUAUAAUAA		II	II	1181	5	4212	25	535	0	10	0.3	70.1991	3.11366	nuclear periphery
YLR026C	SED5	cis-Golgi t-SNARE syntaxin; required for vesicular transport between the ER and the Golgi complex; binds at least 9 SNARE proteins	III	1.19682	0.735824	0.21618	-0.38502	-0.796941	-1.93196	0	0	UGUACAAUAA			II	5820	20	9680	1135	2141	188	6	0.056	57.8171	2.56446	NA
YOL080C	REX4	Putative RNA exonuclease; possibly involved in pre-rRNA processing and ribosome assembly	III	1.80525	1.34139	0.779696	0.21618	-0.758641	-2.84914	0	0	UGUACAUUAG			II	3248	1593	5067	70	663	5	6	-0.403	89.5267	3.97093	nucleolus,nucleus
YER087W	AIM1	Protein with similarity to tRNA synthetases; non-tagged protein is detected in purified mitochondria; null mutant is viable and displays elevated frequency of mitochondrial genome loss	III	2.45237	2.2798	1.50938	0.389972	-1.93196	0	0	0	UGUAUAUAAC	II		II	5022	4	11790	34	860	9	9	-0.23	12.197	0.540996	NA
YGR209C	TRX2	Cytoplasmic thioredoxin isoenzyme; part of thioredoxin system which protects cells against oxidative and reductive stress; forms LMA1 complex with Pbi2p; acts as a cofactor for Tsa1p; required for ER-Golgi transport and vacuole inheritance; with Trx1p, facilitates mitochondrial import of small Tims Tim9p, Tim10p, Tim13p by maintaining them in reduced form; abundance increases under DNA replicatio…	III	2.09315	1.30603	1.05085	0.686128	0.170844	-1.03442	-4.28149	0	UGUAUAAAAU		III	II	4606	586	10809	2411	1619	362	9	NA	687.358	30.4876	cytoplasm,nucleus
YNL087W	TCB2	ER protein involved in ER-plasma membrane tethering; one of 6 proteins (Ist2p, Scs2p, Scs22p, Tcb1p, Tcb2p, Tcb3p) that connect ER to plasma membrane (PM) and regulate PM phosphatidylinositol-4-phosphate (PI4P) levels by controlling access of Sac1p phosphatase to its substrate PI4P in the PM; contains 3 calcium and lipid binding domains; mRNA is targeted to bud; TCB2 has a paralog, TCB1, that aro…	III	2.56086	1.70435	1.15409	0.545636	-0.796941	-4.28149	-4.28149	0	UGUAAAUUGU		II	II	2313	2	83390	14	1353	6	6	0.305	114.997	5.10065	cell periphery
YIL096C	BMT5	Methyltransferase required for m3U2634 methylation of the 25S rRNA; S-adenosylmethionine-dependent; associates with precursors of the 60S ribosomal subunit; predicted to be involved in ribosome biogenesis	III	2.70997	1.95822	1.5147	1.24741	0.349854	-0.931956	-3.51692	-3.51692	UGUAAAAUAG			II	62281	1	107890	133	17519	6	4	-0.506	58.7147	2.60427	nucleolus,nucleus
YKL014C	URB1	Protein required for the normal accumulation of 25S and 5.8S rRNAs; nucleolar protein; associated with the 27SA2 pre-ribosomal particle; proposed to be involved in the biogenesis of the 60S ribosomal subunit	III	1.69527	0.407552	-0.211493	-0.537577	-1.04918	-1.21149	-1.95957	-2.2815	UGUAUAAUAU			II	44473	4	67522	19	9264	0	9	-0.289	100.437	4.45486	nucleolus
YDR155C	CPR1	Cytoplasmic peptidyl-prolyl cis-trans isomerase (cyclophilin); catalyzes the cis-trans isomerization of peptide bonds N-terminal to proline residues; binds the drug cyclosporin A; N-terminally propionylated in vivo; protein abundance increases in response to DNA replication stress	III	2.91762	2.16587	1.16446	-0.064965	-0.721332	-1.31886	0	0	UGUAUAUGUA	III	III	II	959	5	1686	47	835	2	9	NA	935.756	41.5051	cytoplasm,nucleus
YLR406C	RPL31B	Ribosomal 60S subunit protein L31B; associates with karyopherin Sxm1p; loss of both Rpl31p and Rpl39p confers lethality; homologous to mammalian ribosomal protein L31, no bacterial homolog; RPL31B has a paralog, RPL31A, that arose from the whole genome duplication	III	2.39591	1.3645	0.498976	-0.346993	-0.346993	-1.19499	-3.51692	0	UGUAAAAAAA	II	I	II	3610	301	10317	184	668	51	4	NA	505.462	22.4196	cytoplasm
YMR076C	PDS5	Cohesion maintenance factor; involved in sister chromatid condensation and cohesion; colocalizes with cohesin on chromosomes; performs its cohesin maintenance function in pre-anaphase cells by protecting the integrity of the cohesion complex; also required during meiosis; relocalizes to the cytosol in response to hypoxia	III	2.37176	1.96006	1.66741	0.775515	-0.63829	-1.77082	0	0	UGUAUAUAUG		IV	II	2078	78	11790	14	501	13	5	-0.253	27.3381	1.21257	nucleus
YHL007C	STE2	Cdc42p-activated signal transducing kinase; involved in pheromone response, pseudohyphal/invasive growth, vacuole inheritance, down-regulation of sterol uptake; GBB motif binds Ste4p; member of the PAK (p21-activated kinase) family	III	1.94087	1.05045	0.619653	-0.59308	-1.19499	0	0	0	UGUAUAUUUG			III	1763	697	61608	254	376	120	10	-0.008	58.9183	2.6133	cytoplasm,bud
YPL118W	MRP51	Mitochondrial ribosomal protein of the small subunit; MRP51 exhibits genetic interactions with mutations in the COX2 and COX3 mRNA 5'-untranslated leader sequences	III	2.94864	2.20808	1.56571	0.722347	-0.903296	-1.77082	-2.84914	-4.28149	UGUAAAUAAA	II	III	II	6864	21	18934	448	2025	23	15	-0.077	85.9629	3.81285	mitochondrion
YNL106C	INP52	Polyphosphatidylinositol phosphatase; dephosphorylates a number of phosphatidylinositol phosphates (PtdInsPs, PIPs) to PI; involved in endocytosis; hyperosmotic stress causes translocation to actin patches; synaptojanin-like protein with a Sac1 domain; INP52 has a paralog, INP53, that arose from the whole genome duplication	III	2.644	1.73797	0.639267	-0.424075	-0.849139	-3.2815	0	0	UGUAUCAUAA			II	3621	57	4458	42	1759	1	8	-0.009	15.6854	0.69572	actin
YGR191W	HIP1	High-affinity histidine permease; also involved in the transport of manganese ions	III	1.76452	0.639267	0.082445	-0.414491	-0.796941	0	0	0	UGUAUAUUAC		IV	II	39923	211	61608	79	1713	2	6	-0.158	100.35	4.451	ER,cell periphery,vacuole,bud
YER038C	KRE29	Subunit of the SMC5-SMC6 complex; this complex is involved in removal of X-shaped DNA structures that arise between sister chromatids during DNA replication and repair; heterozygous mutant shows haploinsufficiency in K1 killer toxin resistance	IV	0.779696	0.401504	-0.264176	-1.33685	-3.51692	-3.51692	0	0	UGUAUUAUAU	IV	III	II	4942	101	7959	203	840	6	1	NA	11.0839	0.491623	cytoplasm,nucleus
YDR016C	DAD1	Essential subunit of the Dam1 complex (aka DASH complex); complex couples kinetochores to the force produced by MT depolymerization thereby aiding in chromosome segregation; is transferred to the kinetochore prior to mitosis	IV	0.847323	0.488797	0.21618	-0.903296	-1.77082	-2.39441	-3.2815	0	UGUAAUUUUA		I	II	875	5	5513	36	292	0	6	-0.288	46.6467	2.069	spindle pole
YDR212W	TCP1	Alpha subunit of chaperonin-containing T-complex; complex mediates protein folding in the cytosol; involved in actin cytoskeleton maintenance; overexpression in neurons suppresses formation of pathogenic conformations of huntingtin protein	IV	1.32365	0.643862	-0.237594	-1.09617	-2.04918	-4.28149	0	0	UGUAAACUAA			II	30088	2	46976	53	10823	1	3	0.086	287.029	12.7311	NA
YKL165C	MCD4	Protein involved in GPI anchor synthesis; multimembrane-spanning protein that localizes to the endoplasmic reticulum; highly conserved among eukaryotes; GPI stands for glycosylphosphatidylinositol	IV	2.81391	1.91785	1.04739	0.566276	-2.84914	-4.28149	0	0	UGUAUAUUAA			II	39923	83	61608	107	16718	1	4	-0.622	48.4366	2.14839	vacuole
YDR127W	ARO1	Pentafunctional arom protein; catalyzes steps 2 through 6 in the biosynthesis of chorismate, which is a precursor to aromatic amino acids	IV	1.40994	0.800902	-0.38502	-1.51692	-1.51692	0	0	0	UGUAUAUUUU			III	1763	5	61608	38	286	2	6	-0.027	118.962	5.27653	cytoplasm
YGR192C	TDH3	Glyceraldehyde-3-phosphate dehydrogenase (GAPDH), isozyme 3; involved in glycolysis and gluconeogenesis; tetramer that catalyzes the reaction of glyceraldehyde-3-phosphate to 1,3 bis-phosphoglycerate; detected in the cytoplasm and cell wall; GAPDH-derived antimicrobial peptides secreted by S. cerevisiae are active against a wide variety of wine-related yeasts and bacteria; binds AU-rich RNA	IV	1.52777	0.396068	-0.356138	-1.26418	-2.51692	-2.51692	-2.51692	0	UAUAUACUAU	IV	III	II	156	0	727	14	47	0	4	NA	14607.9	647.928	cytoplasm,nucleus
YHR108W	GGA2	Protein that regulates Arf1p, Arf2p to facilitate Golgi trafficking; binds phosphatidylinositol 4-phosphate, which plays a role in TGN localization; has homology to gamma-adaptin; GGA2 has a paralog, GGA1, that arose from the whole genome duplication	IV	2.43611	1.66262	0.662623	-0.945695	-3.2815	0	0	0	UGUAUAUUUU			II	1763	54	61608	6	286	0	5	-0.091	130.701	5.79721	late Golgi
YPR053C		Dubious open reading frame; unlikely to encode a functional protein, based on available experimental and comparative sequence data; partially overlaps verified gene NHP6A/YPR052C	IV	1.32365	0.472789	0.302789	-0.758641	-1.84914	0	0	0	UGUGAUUUAA		I	II	42	4	149	20	12	0	#N/A	NA	5.71642	0.25355	NA
YIL052C	RPL34B	Ribosomal 60S subunit protein L34B; homologous to mammalian ribosomal protein L34, no bacterial homolog; RPL34B has a paralog, RPL34A, that arose from the whole genome duplication	IV	1.45921	0.177196	-0.255594	-0.255594	-0.346993	-3.51692	0	0	UAUACAAUUG	IV	III	II	16	0	225	140	8	2	0	NA	1034.56	45.8878	cytoplasm
YMR194W	RPL36A	Ribosomal 60S subunit protein L36A; N-terminally acetylated; binds to 5.8 S rRNA; homologous to mammalian ribosomal protein L36, no bacterial homolog; RPL36A has a paralog, RPL36B, that arose from the whole genome duplication	IV	1.12404	0.731514	0.025605	-1.04918	-1.84914	-2.14473	-2.84914	-3.51692	UGUAAUAUAU		II	II	15767	97	25034	139	2595	7	3	NA	426.761	18.9289	cytoplasm
YPL032C	SVL3	Protein of unknown function; mutant phenotype suggests a potential role in vacuolar function; green fluorescent protein (GFP)-fusion protein localizes to the cell periphery, cytoplasm, bud, and bud neck; relocalizes from bud neck to cytoplasm upon DNA replication stress; SVL3 has a paralog, PAM1, that arose from the whole genome duplication	IV	0.50463	0.254137	-0.809447	-1.21149	-1.77082	0	0	0	UGUAUUAUAG	IV		III	4942	15	7959	439	1299	29	8	0.334	76.0612	3.37367	ambiguous,bud neck,cytoplasm,cell periphery,bud
YJR145C	RPS4A	Protein component of the small (40S) ribosomal subunit; mutation affects 20S pre-rRNA processing; homologous to mammalian ribosomal protein S4, no bacterial homolog; RPS4A has a paralog, RPS4B, that arose from the whole genome duplication	IV	1.39607	0.456602	-0.203218	-0.849139	-2.51692	-3.51692	0	0	UAUAUAUUAG		III	II	581	5	1818	42	109	1	9	NA	993.756	44.0777	cytoplasm
YJL146W	IDS2	Protein involved in modulation of Ime2p activity during meiosis; appears to act indirectly to promote Ime2p-mediated late meiotic functions; found in growing cells and degraded during sporulation	IV	0.56086	0.177196	-0.38502	-0.38502	-0.758641	-2.51692	0	0	UGUAUACUAC			II	7713	2	10458	109	293	15	5	0.234	13.1404	0.582839	cytoplasm,nucleus
YHR013C	ARD1	Subunit of protein N-terminal acetyltransferase NatA; NatA is comprised of Nat1p, Ard1p, and Nat5p; acetylates many proteins and thus affects telomeric silencing, cell cycle, heat-shock resistance, mating, and sporulation; human Ard1p levels are elevated in cancer cells; protein abundance increases in response to DNA replication stress	IV	2.07736	0.981031	0.272748	-0.614866	-4.28149	0	0	0	UGUAAUAUCC		II	II	256	22	25034	674	78	48	2	-0.422	147.055	6.5226	cytoplasm
YER036C	ARB1	ATPase of the ATP-binding cassette (ABC) family; involved in 40S and 60S ribosome biogenesis, has similarity to Gcn20p; shuttles from nucleus to cytoplasm, physically interacts with Tif6p, Lsg1p	IV	2.67904	1.52528	0.401504	-1.45436	-2.84914	-3.51692	0	0	UGUAUUUUAA		IV	II	2008	8	4228	18	766	0	5	NA	528.763	23.4531	cytoplasm
YOR144C	ELG1	Subunit of an alternative replication factor C complex; important for DNA replication and genome integrity; suppresses spontaneous DNA damage; involved in homologous recombination-mediated repair and telomere homeostasis; required for PCNA (Pol30p) unloading during DNA replication	IV	0.942949	0.36171	-0.570373	-0.945695	-1.09617	-2.84914	0	0	UGUAUAAUAA			II	44473	8	67522	49	16608	0	4	-0.027	18.0904	0.802394	cytoplasm,nucleus
YHL002W	HSE1	Subunit of the endosomal Vps27p-Hse1p complex; complex is required for sorting of ubiquitinated membrane proteins into intralumenal vesicles prior to vacuolar degradation, as well as for recycling of Golgi proteins and formation of lumenal membranes	IV	1.54072	0.407552	0.089985	-1.47414	0	0	0	0	UGUACCUUUA			II	160	11	1053	25	47	1	3	0.209	39.8325	1.76676	endosome
YDL007W	RPT2	ATPase of the 19S regulatory particle of the 26S proteasome; one of six ATPases of the regulatory particle; involved in the degradation of ubiquitinated substrates; required for normal peptide hydrolysis by the core 20S particle; N-myristoylation of Rpt2p at Gly2 is involved in regulating the proper intracellular distribution of proteasome activity by controlling the nuclear localization of the 2…	IV	2.55082	1.14439	-1.39441	-2.14473	-2.14473	-3.51692	0	0	UGUACAUUUU			III	110	8	5067	18	13	0	3	0.151	129.831	5.7586	NA
YGL076C	RPL7A	Ribosomal 60S subunit protein L7A; required for processing of 27SA3 pre-rRNA to 27SB pre-rRNA during assembly of large ribosomal subunit; depletion leads to a turnover of pre-rRNA; contains a conserved C-terminal Nucleic acid Binding Domain (NDB2); binds to Domain II of 25S and 5.8S rRNAs; homologous to mammalian ribosomal protein L7 and bacterial L30; RPL7A has a paralog, RPL7B, that arose from …	IV	0.891846	0.124037	-0.809447	-1.09617	-1.26418	0	0	0	UGUAUAUUGU		IV	III	1221	12	61608	45	659	0	10	NA	344.841	15.2953	cytoplasm
YPL094C	SEC62	Essential subunit of Sec63 complex; with Sec61 complex, Kar2p/BiP and Lhs1p forms a channel competent for SRP-dependent and post-translational SRP-independent protein targeting and import into the ER; cotranslationally N-acetylated by NatA; other members are Sec63p, Sec66p, and Sec72p	IV	2.36048	1.15768	-0.203218	-0.721332	-1.45436	-3.2815	-3.2815	0	UGUACAAACC	II	II	II	150	16	1294	17	36	2	5	-0.187	164.355	7.2899	ER
YLR218C	COA4	Twin Cx(9)C protein involved in cytochrome c oxidase organization; organization includes assembly or stability; localizes to the mitochondrial intermembrane space via the Mia40p-Erv1p system; interacts genetically with CYC1 and with cytochrome c oxidase assembly factors	IV	0.731514	-0.064965	-0.59308	-0.931956	0	0	0	0	UGUAUAUAAU	I	II	III	5022	19	11790	134	1322	14	10	-0.315	8.3326	0.36959	cytoplasm,nucleus
YDR129C	SAC6	Fimbrin, actin-bundling protein; cooperates with calponin/transgelin Scp1p in organization and maintenance of actin cytoskeleton; relocalizes from plasma membrane to cytoplasm upon DNA replication stress; human homologs PLS3 and LCP1 implicated in spinocerebellar ataxia type 2 (SCA2) can each complement yeast null mutant	IV	2.12896	0.847323	-0.177726	-1.03442	-4.28149	0	0	0	UGUAAAAAUG		I	II	3579	283	10317	193	971	19	9	0.413	199.533	8.85024	actin
YFL017W-A	SMX2	Core Sm protein Sm G; part of heteroheptameric complex (with Smb1p, Smd1p, Smd2p, Smd3p, Sme1p, and Smx3p) that is part of the spliceosomal U1, U2, U4, and U5 snRNPs; homolog of human Sm G	IV	1.17402	0.722347	0.010622	-0.889953	-2.14473	0	0	0	UGUACUAUAC		II	II	2809	754	4693	800	155	22	1	-0.735	68.6363	3.04434	nucleus
YBR198C	TAF5	Subunit (90 kDa) of TFIID and SAGA complexes; involved in RNA polymerase II transcription initiation and in chromatin modification	IV	1.16766	1.04003	0.223054	-1.16067	0	0	0	0	UGUAUGUUGC		II	II	17	216	436	363	2	18	6	-0.073	51.7187	2.29397	nucleus
YMR067C	UBX4	UBX domain-containing protein that interacts with Cdc48p; involved in degradation of polyubiquitinated proteins via the ERAD (ER-associated degradation) pathway; modulates the Cdc48p-Nplp-Ufd1p AAA ATPase complex during its role in delivery of misfolded proteins to the proteasome; protein abundance increases in response to DNA replication stress	IV	0.899999	0.266803	0.158053	-0.056615	-2.84914	-3.51692	0	0	UGUACACGUA			II	8	7	38	47	4	9	5	0.004	37.7812	1.67577	cytoplasm,nucleus
YBL023C	MCM2	Protein involved in DNA replication; component of the Mcm2-7 hexameric helicase complex that binds chromatin as a part of the pre-replicative complex; relative distribution to the nucleus increases upon DNA replication stress	IV	1.72669	1.14725	0.308588	-1.19499	0	0	0	0	UGUAUAAUUU		I	II	2580	163	67522	33	391	1	7	0.019	37.6046	1.66794	cytoplasm,nucleus
YBR222C	PCS6	Oxalyl-CoA synthetase; capable of catalyzing conversion of oxalate to oxalyl-CoA; catalyzes first step in pathway of oxalate degradation that functions to protect yeast from inhibitory effects of oxalate; peroxisomal protein that binds mRNA; localizes to both peroxisomal peripheral membrane and matrix, expression is highly inducible by oleic acid; similar to E. coli long chain acyl-CoA synthetase	IV	3.50652	2.10005	1.25414	-0.464218	-3.51692	-3.51692	0	0	UGUAUUUUAU			II	2008	85	4228	526	306	534	2	0.067	70.6991	3.13583	cytoplasm
YIL078W	THS1	Threonyl-tRNA synthetase; essential cytoplasmic protein; human homolog TARS can complement yeast null mutant	IV	0.79265	0.338562	-0.527211	-0.63829	-1.67349	-2.14473	-3.51692	0	UGUAAAGAAU		IV	III	1083	4	3052	469	385	19	7	NA	756.224	33.5421	cytoplasm
YHL031C	GOS1	v-SNARE protein involved in Golgi transport; homolog of the mammalian protein GOS-28/GS28	IV	1.22882	0.717996	-0.989378	-1.67349	0	0	0	0	UGUAAAAACA			III	1227	995	10317	540	162	66	5	-0.371	35.554	1.57699	NA
YDR097C	MSH6	Protein required for mismatch repair in mitosis and meiosis; forms a complex with Msh2p to repair both single-base & insertion-deletion mispairs; also involved in interstrand cross-link repair; potentially phosphorylated by Cdc28p	IV	0.610293	0.103391	-0.570373	-1.67349	-1.67349	-4.28149	0	0	UGUAAGAUUU	III	IV	II	546	6	9878	42	56	0	4	-0.336	37.2878	1.65389	nucleus
YGL145W	TIP2	Peripheral membrane protein required for COPI vesicle fusion to the ER; mediates Sey1p-independent homotypic ER fusion; prohibits back-fusion of COPII vesicles with the ER; forms a tethering complex with Sec39p and Dsl1p that interacts with ER SNAREs Sec20p and Use1p	IV	1.33539	0.440231	-0.203218	-0.796941	-2.14473	-2.84914	0	0	UGUACCAAAU		IV	II	155	13	599	6255	61	288	4	0.089	27.2439	1.20839	ER
YOR187W	TUF1	Mitochondrial translation elongation factor Tu; comprises both GTPase and guanine nucleotide exchange factor activities, while these activities are found in separate proteins in S. pombe and humans	IV	1.08622	0.744906	-0.041784	-1.51692	-1.93196	0	0	0	UGUAAAAGAU	I		III	1035	124	2518	54	397	2	15	0.239	193.493	8.58232	mitochondrion
YHL023C	NPR3	Subunit of the Iml1p/SEACIT complex; SEACIT (Iml1p-Npr2p-Npr3p) is a subcomplex of SEAC, a coatomer-related complex that associates dynamically with the vacuole; Npr3p may have a structural or regulatory role, supporting Iml1p function as a GAP for the Rag family GTPase Gtr1p, and leading to inhibition of TORC1 signaling in response to amino acid deprivation; SEACIT is required for non-nitrogen-s…	IV	1.44023	0.813668	-0.255594	-0.59308	-1.93196	-1.93196	0	0	UGUAUAUAAG		III	III	5022	42	11790	30	674	1	4	0.14	19.9168	0.883404	NA
YHR049W	FSH1	Putative serine hydrolase; localizes to both the nucleus and cytoplasm; sequence is similar to S. cerevisiae Fsh2p and Fsh3p and the human candidate tumor suppressor OVCA2	IV	1.22882	0.110047	-0.169642	-1.51692	0	0	0	0	UGUAUAUAUA		III		2078	95	11790	792	695	66	7	0.347	179.402	7.95732	cytoplasm,nucleus
YKR067W	GPT2	Glycerol-3-phosphate/dihydroxyacetone phosphate sn-1 acyltransferase; located in lipid particles and the ER; involved in the stepwise acylation of glycerol-3-phosphate and dihydroxyacetone in lipid biosynthesis; the most conserved motifs and functionally relevant residues are oriented towards the ER lumen	IV	1.34737	0.540717	0.396068	-0.229168	-0.414491	-4.28149	0	0	UGUAAAUAAU	III	III	III	6864	1	18934	24	2136	0	8	-0.114	16.8853	0.748942	ER
YJL069C	UTP18	Small-subunit processome protein involved in pre-18S rRNA maturation; part of a subunit of the 90S preribosomal particle capable of interacting directly with the 5' ETS of the 35S pre-rRNA; contains WD40 repeats	IV	0.488797	0.278668	-0.018969	-0.327824	-2.04918	0	0	0	UGUAAAAAAA			II	3610	73	10317	439	668	7	6	0.217	85.5	3.79232	nucleolus
YHR174W	ENO2	Enolase II, a phosphopyruvate hydratase; catalyzes conversion of 2-phosphoglycerate to phosphoenolpyruvate during glycolysis and the reverse reaction during gluconeogenesis; expression induced in response to glucose; ENO2 has a paralog, ENO1, that arose from the whole genome duplication	IV	0.809584	0.039619	-0.38502	-0.673487	-1.03442	-4.28149	-4.28149	-4.28149	UAUAAGUUAC			II	52	1	339	92	9	3	7	NA	10513.8	466.336	cytoplasm
YOR127W	RGA1	GTPase-activating protein for polarity-establishment protein Cdc42p; implicated in control of septin organization, pheromone response, and haploid invasive growth; relocalizes from bud neck to cytoplasm upon DNA replication stress; RGA1 has a paralog, RGA2, that arose from the whole genome duplication	IV	0.766625	0.170844	0.103391	-1.11157	-1.11157	0	0	0	UGUAUAAUAA			III	44473	46	67522	86	16608	0	10	-0.061	31.3974	1.39262	bud neck,cytoplasm,cell periphery
YER080W	AIM9	Putative protein of unknown function; the authentic, non-tagged protein is detected in highly purified mitochondria in high-throughput studies; null mutant displays elevated frequency of mitochondrial genome loss	IV	0.575925	0.170844	-0.041784	-0.63829	-2.69653	-2.69653	0	0	UGUACACAAU			III	28	4	72	12	14	1	12	0.332	92.0048	4.08084	mitochondrion
YGL207W	SPT16	Subunit of the heterodimeric FACT complex (Spt16p-Pob3p); FACT associates with chromatin via interaction with Nhp6Ap and Nhp6Bp, and reorganizes nucleosomes to facilitate access to DNA by RNA and DNA polymerases; SPT16 specifically required for diauxic shift-induced H2B deposition onto rDNA genes; some mutations cause reduced nucleosome occupancy over highly transcribed regions of the yeast genome	IV	3.9949	1.68416	0.407552	-1.39441	-2.2815	0	0	0	UGUACACUCA			II	26	5	1308	38	6	4	4	-0.343	124.296	5.5131	nucleus
YMR275C	BUL1	Ubiquitin-binding component of the Rsp5p E3-ubiquitin ligase complex; disruption causes temperature-sensitive growth, overexpression causes missorting of amino acid permeases; BUL1 has a paralog, BUL2, that arose from the whole genome duplication	IV	1.46731	1.421	-0.822063	-0.822063	-0.822063	0	0	0	UGUAUGGUUU				7	0	99	10	1	0	3	0.023	32.2229	1.42923	cytoplasm
YPR125W	YLH47	Mitochondrial inner membrane protein; exposed to the mitochondrial matrix; associates with mitochondrial ribosomes; NOT required for respiratory growth; homolog of human Letm1, a protein implicated in Wolf-Hirschhorn syndrome	IV	1.61993	1.26013	0.170844	-0.237594	-1.04918	-2.84914	-4.28149	-4.28149	UGUACAUAAG	IV		II	287	24	746	91	28	12	5	-0.066	58.8962	2.61232	mitochondrion
YBR154C	RPB5	RNA polymerase subunit ABC27; common to RNA polymerases I, II, and III; contacts DNA and affects transactivation	IV	0.805489	0.278668	-0.096165	-1.04918	-1.95957	0	0	0	UGUACAAUUA			II	251	71	9680	30	59	2	6	-0.232	315.842	14.0091	NA
YLL040C	VPS13	Protein involved in prospore membrane morphogenesis; heterooligomeric or homooligomeric complex; peripherally associated with membranes; involved in sporulation, vacuolar protein sorting, prospore membrane formation during sporulatoin, and protein-Golgi retention; homologous to human CHAC and COH1 which are involved in chorea acanthocytosis and Cohen syndrome, respectively	IV	2.92552	2.02167	0.170844	-0.721332	-2.04918	-3.51692	-3.51692	-3.51692	UGUACACUAU			II	929	70	1308	25	246	0	2	-0.312	41.7966	1.85387	cytoplasm,endosome
YKL204W	EAP1	eIF4E-associated protein, competes with eIF4G for binding to eIF4E; accelerates mRNA degradation by promoting decapping, facilitated by interaction with eIF4E; essential for Puf5p mediated repression; associates with Puf5p and Dhh1p; inhibits cap-dependent translation; functions independently of eIF4E to maintain genetic stability; plays a role in cell growth, implicated in the TOR signaling casc…	IV	2.06824	1.45106	0.203059	-1.03442	-1.51692	0	0	0	UGUAUAUAAC			II	5022	72	11790	961	860	106	4	0.308	38.8017	1.72104	cytoplasm
YDR087C	RRP1	Essential evolutionarily conserved nucleolar protein; necessary for biogenesis of 60S ribosomal subunits and for processing of pre-rRNAs to mature rRNA; associated with several distinct 66S pre-ribosomal particles	IV	2.12549	1.56329	0.796782	0.130598	-2.69653	-4.28149	0	0	UGUAAGUAAU		II	II	149	26	468	1684	44	76	4	0.135	159.079	7.05588	nucleolus,nucleus
YOR283W		Phosphatase with a broad substrate specificity; has some similarity to GPM1/YKL152C, a phosphoglycerate mutase; YOR283W is not an essential gene	IV	1.48338	0.291121	0.068843	-0.056615	0	0	0	0	UGUAUUUUAU		II	II	2008	10	4228	130	306	52	4	-0.255	106.492	4.7234	cytoplasm,nucleus
YKL056C	TMA19	Protein that associates with ribosomes; homolog of translationally controlled tumor protein; green fluorescent protein (GFP)-fusion protein localizes to the cytoplasm and relocates to the mitochondrial outer surface upon oxidative stress	IV	2.1306	1.17402	0.879756	-0.945695	-1.53758	-2.69653	-4.28149	-4.28149	UGUAUAGUUC		II	II	165	158	5569	684	20	23	6	NA	3453.46	153.177	cytoplasm
YDR233C	RTN1	Reticulon protein; stabilizes membrane curvature; involved in nuclear pore assembly and maintenance of tubular ER morphology; mutant overexpressing RTN1 shows increase in tubular ER; interacts with exocyst subunit Sec6p, Yip3p, and Sbh1p; more abundant than Rtn2p; member of the RTNLA subfamily; mutants have reduced phosphatidylserine transfer between the ER and mitochondria; RTN1 has a paralog, R…	IV	1.21309	0.21618	-0.237594	-1.14473	0	0	0	0	UAUAUACUCA		III	III	70	63	727	191	7	12	8	NA	421.916	18.7139	ER,cell periphery
YNL232W	CSL4	Exosome non-catalytic core component; involved in 3'-5' RNA processing and degradation in both the nucleus and the cytoplasm; predicted to contain an S1 RNA binding domain; has similarity to human hCsl4p (EXOSC1)	IV	1.35018	1.06844	0.708743	-1.16067	-2.69653	0	0	0	UAUAUAUUAU		III	III	581	6	1818	63	99	1	5	-0.016	83.3617	3.69748	cytoplasm,nucleolus,nucleus
YOR056C	NOB1	Protein involved in proteasomal and 40S ribosomal subunit biogenesis; required for cleavage of the 20S pre-rRNA to generate the mature 18S rRNA; cleavage is activated by Fun12p, a GTPase and translation initiation factor; relocalizes from nucleus to nucleolus upon DNA replication stress	IV	1.64386	0.931282	0.137131	0.137131	-4.28149	-4.28149	-4.28149	0	UGUGUACUAG			III	229	640	374	1468	17	422	2	0.173	100.449	4.45539	cytoplasm
YBR011C	IPP1	Cytoplasmic inorganic pyrophosphatase (PPase); homodimer that catalyzes the rapid exchange of oxygens from Pi with water, highly expressed and essential for viability, active-site residues show identity to those from E. coli PPase	IV	2.18704	0.749176	0.296967	-1.95957	-2.2815	-2.69653	-3.2815	-4.28149	UGUAAAACAA	IV	IV	II	2147	152	7987	535	901	93	6	NA	1566.28	69.4721	cytoplasm,nucleus
YPL235W	RVB2	ATP-dependent DNA helicase, also known as reptin; member of the AAA+ and RuvB protein families, similar to Rvb1p; conserved component of multiple complexes including the INO80 complex, the Swr1 complex, and the R2TP complex (Rvb1-Rvb2-Tah1-Pih1); involved in multiple processes such as chromatin remodeling, box C/D snoRNP assembly, and RNA polymerase II assembly	IV	1.90361	1.12036	0.514698	0.157303	-1.84914	-4.28149	0	0	UGUACUUUAA		IV	II	450	914	1164	2186	149	113	7	-0.011	127.2	5.64191	NA
YGR206W	MVB12	ESCRT-I subunit required to stabilize ESCRT-I core complex oligomers; the ESCRT-I core complex (Stp22p, Vps28p, Srn2p) is involved in ubiquitin-dependent sorting of proteins into the endosome; deletion mutant is sensitive to rapamycin and nystatin	IV	1.60767	1.09966	-0.120244	-0.203218	-3.2815	-3.2815	0	0	UGUACACAUA			II	23	145	72	64	7	5	4	-0.274	28.6575	1.27109	endosome
YPL145C	KES1	One of seven members of the yeast oxysterol binding protein family; involved in negative regulation of Sec14p-dependent Golgi complex secretory functions, peripheral membrane protein that localizes to the Golgi complex; KES1 has a paralog, HES1, that arose from the whole genome duplication	IV	0.847323	0.418318	0.103391	-1.11157	-2.2815	0	0	0	UGUACGCUUA		IV		18	1	101	24	4	3	9	0.612	234.612	10.4061	cytoplasm
YNL185C	MRPL19	Mitochondrial ribosomal protein of the large subunit	IV	0.575925	0.36171	0.010622	-1.09617	-1.67349	-1.93196	0	0	UGUAUAUAAG	II		III	5022	14	11790	103	674	5	15	-0.81	42.7494	1.89614	mitochondrion
YDL075W	RPL31A	Ribosomal 60S subunit protein L31A; associates with karyopherin Sxm1p; loss of both Rpl31p and Rpl39p confers lethality; homologous to mammalian ribosomal protein L31, no bacterial homolog; RPL31A has a paralog, RPL31B, that arose from the whole genome duplication	IV	1.3645	-0.034425	-0.169642	-0.318856	-0.889953	-1.84914	-3.2815	-4.28149	UGUAUAAAUC	III	II	II	2776	99	10809	93	230	1	4	NA	1498.37	66.4597	NA
YOR117W	RPT5	ATPase of the 19S regulatory particle of the 26S proteasome; one of six ATPases of the regulatory particle; involved in the degradation of ubiquitinated substrates; recruited to the GAL1-10 promoter region upon induction of transcription; similar to human TBP1	IV	2.18213	1.58072	0.97697	-1.09617	-2.14473	-2.51692	0	0	UGUAUACUAC			II	7713	371	10458	69	293	19	7	-0.095	175.54	7.78602	nucleus
YOL052C	SPE2	S-adenosylmethionine decarboxylase; required for the biosynthesis of spermidine and spermine; cells lacking Spe2p require spermine or spermidine for growth in the presence of oxygen but not when grown anaerobically	IV	1.33255	1.01062	-0.889953	-1.14473	-1.14473	-1.51692	0	0	UGUAUAUAUA	IV	III	II	2078	1703	11790	58	695	43	7	0.021	60.6599	2.69055	cytoplasm,nucleus
YOR157C	PUP1	Beta 2 subunit of the 20S proteasome; endopeptidase with trypsin-like activity that cleaves after basic residues; synthesized as a proprotein before being proteolytically processed for assembly into 20S particle; human homolog is subunit Z	IV	1.03613	0.695009	-0.144732	-0.673487	-1.51692	0	0	0	UAUAACAUAA			II	433	427	1674	910	170	92	6	NA	216.094	9.58478	cytoplasm,nucleus
YGL063W	PUS2	Mitochondrial tRNA:pseudouridine synthase; acts at positions 27 and 28, but not at position 72; efficiently and rapidly targeted to mitochondria, specifically dedicated to mitochondrial tRNA modification; mutation also affects pseudouridylation of some nuclear-encoded mRNAs; PUS2 has a paralog, PUS1, that arose from the whole genome duplication	IV	1.15409	1.05045	0.731009	0	0	0	0	0	UGUAUAUAAG	III			5022	122	11790	596	674	46	2	0.023	11.1882	0.496249	NA
YDR363W-A	SEM1	Component of lid subcomplex of 26S proteasome regulatory subunit; involved in mRNA export mediated by TREX-2 complex (Sac3p-Thp1p); assumes different conformations in different contexts, functions as molecular glue stabilizing the Rpn3p/Rpn7p regulatory heterodimer, and tethers it to lid helical bundle; ortholog of human DSS1; protein abundance increases in response to DNA replication stress	IV	2.78594	0.266106	-0.673487	-1.93196	-2.51692	0	0	0	UGUAGUAUAA		III	II	718	79	1514	40	258	0	4	-0.234	203.671	9.03375	nucleus
YOL136C	PFK27	6-phosphofructo-2-kinase; catalyzes synthesis of fructose-2,6-bisphosphate; inhibited by phosphoenolpyruvate and sn-glycerol 3-phosphate, expression induced by glucose and sucrose, transcriptional regulation involves protein kinase A	IV	1.16089	0.418318	0.150861	0.082445	0	0	0	0	UGUAUACUAU			II	7713	38	10458	261	1642	41	6	-0.06	70.6936	3.13559	cytoplasm,nucleus
YIL128W	MET18	Component of cytosolic iron-sulfur protein assembly (CIA) machinery; acts at a late step of Fe-S cluster assembly; forms the CIA targeting complex with Cia1p and Cia2p that directs Fe-S cluster incorporation into a subset of proteins involved in methionine biosynthesis, DNA replication and repair, transcription, and telomere maintenance; ortholog of human MMS19	IV	0.52029	0.190553	-0.464218	-0.464218	-0.945695	-1.77082	0	0	UGUAUAGUAC			II	3732	7	5569	93	148	3	4	-0.316	43.2619	1.91887	cytoplasm
YDL189W	RBS1	Protein involved in assembly of the RNA polymerase III (Pol III) complex; high copy suppressor of Pol III assembly mutation and psk1 psk2 mutations that confer temperature-sensitivity for galactose utilization; physically interacts with Pol III; proposed to bind single-stranded nucleic acids via its R3H domain	IV	1.45399	0.575925	0.396068	-0.049181	-0.50551	-4.28149	0	0	UGUAUAUAAG			III	5022	11	11790	140	674	23	2	0.544	55.2713	2.45154	cytoplasm,punctate composite
YMR205C	PFK2	Beta subunit of heterooctameric phosphofructokinase; involved in glycolysis; indispensable for anaerobic growth; activated by fructose-2,6-bisphosphate and AMP; mutation inhibits glucose induction of cell cycle-related genes	IV	1.54318	0.984657	0.19682	-0.203218	-4.28149	-4.28149	-4.28149	-4.28149	UGUAUACUGG		IV	II	318	5	10458	39	18	5	8	NA	791.06	35.0872	cytoplasm
YLR044C	PDC1	Major of three pyruvate decarboxylase isozymes; key enzyme in alcoholic fermentation; decarboxylates pyruvate to acetaldehyde; involved in amino acid catabolism; subject to glucose-, ethanol-, and autoregulation; activated by phosphorylation in response to glucose levels; N-terminally propionylated in vivo	IV	1.12404	0.378991	-0.721332	-1.39441	-1.60393	-3.51692	0	0	UGUAUAUUCU	III	III	II	486	62	61608	251	103	43	5	NA	13857.1	614.627	ambiguous,cytoplasm,nucleus
YOL004W	SIN3	Component of both the Rpd3S and Rpd3L histone deacetylase complexes; involved in transcriptional repression and activation of diverse processes, including mating-type switching and meiosis; involved in the maintenance of chromosomal integrity	IV	2.40708	1.41263	0.498976	-1.31886	-1.67349	-3.51692	0	0	UGUACCUUUA		II	II	160	53	1053	126	47	17	5	-0.015	78.6202	3.48717	mitochondrion
YHL030W	ECM29	Scaffold protein; assists in association of the proteasome core particle with the regulatory particle; inhibits proteasomal ATPase activity; degraded by the mature proteasome after assembly; contains HEAT-like repeats; protein increases in abundance and relocalizes from nucleus to cytoplasm upon DNA replication stress	IV	1.4702	0.867564	0.60032	-1.19499	-2.51692	0	0	0	UGUAUAGUAU			III	3732	33	5569	11	726	0	8	-0.258	45.5035	2.01829	cytoplasm,nucleus
YGL226C-A	OST5	Zeta subunit of the oligosaccharyltransferase complex of the ER lumen; complex catalyzes asparagine-linked glycosylation of newly synthesized proteins	IV	0.235283	-0.177726	-0.264176	-0.931956	-1.19499	-1.19499	-3.51692	-3.51692	UGUAAAAAUG	IV	III	II	3579	34	10317	105	971	1	0	-0.262	115.033	5.10227	ER
YBL035C	POL12	B subunit of DNA polymerase alpha-primase complex; required for initiation of DNA replication during mitotic and premeiotic DNA synthesis; also functions in telomere capping and length regulation	IV	0.278668	0.278668	-0.959567	-1.11157	0	0	0	0	UAUAACUUAC				196	3	1244	21	33	0	4	0.184	28.4386	1.26138	nucleus
YIL103W	DPH1	Protein required for synthesis of diphthamide; required along with Dph2p, Kti11p, Jjj3p, and Dph5p; diphthamide is a modified histidine residue of translation elongation factor 2 (Eft1p or Eft2p); may act in a complex with Dph2p and Kti11p	IV	1.77736	1.2875	1.14725	-1.60393	0	0	0	0	UGUAUAAAUA		III	II	2776	117	10809	365	754	65	7	0.081	61.0662	2.70857	cytoplasm
YDR054C	CDC34	Ubiquitin-conjugating enzyme (E2); catalytic subunit of SCF ubiquitin-protein ligase complex (together with Skp1p, Rbx1p, Cdc53p, and an F-box protein) that regulates cell cycle progression by targeting key substrates for degradation; protein abundance increases in response to DNA replication stress	IV	0.735824	-0.064965	-0.318856	-0.414491	-0.516918	0	0	0	UGUAUAUAAA			III	5022	30	11790	135	1839	3	3	-0.239	91.8124	4.07231	cytoplasm,nucleus
YDR412W	RRP17	Component of the pre-60S pre-ribosomal particle; required for cell viability under standard (aerobic) conditions but not under anaerobic conditions; exonuclease required for 5' end processing of pre-60S ribosomal RNA	IV	0.958216	0.19682	-0.120244	-1.67349	-2.84914	-3.51692	0	0	UGUAAUAUAU		II	II	15767	57	25034	57	2595	6	0	-0.657	57.1145	2.5333	nucleolus,nucleus
YLR058C	SHM2	Cytosolic serine hydroxymethyltransferase; converts serine to glycine plus 5,10 methylenetetrahydrofolate; major isoform involved in generating precursors for purine, pyrimidine, amino acid, and lipid biosynthesis	IV	1.20963	0.545636	-0.291257	-2.14473	-2.84914	-4.28149	-4.28149	-4.28149	UGUAUAUAUG		I	II	2078	73	11790	116	501	4	9	NA	338.353	15.0075	cytoplasm,nucleus
YGL028C	SCW11	Cell wall protein with similarity to glucanases; may play a role in conjugation during mating based on its regulation by Ste12p	IV	1.01813	0.429627	-0.264176	-0.945695	-1.26418	-3.2815	-4.28149	-4.28149	UGUAUAUUAU			II	39923	361	61608	306	7219	17	2	-0.129	139.636	6.19352	ambiguous
YGR172C	YIP1	Integral membrane protein; required for the biogenesis of ER-derived COPII transport vesicles; interacts with Yif1p and Yos1p; localizes to the Golgi, the ER, and COPII vesicles; homolog of human YIPF4	IV	0.796782	0.170844	-0.485302	-1.14473	-1.93196	0	0	0	UGUAUAUAUG	IV	IV		2078	10	11790	19	501	0	8	0.083	86.0375	3.81616	NA
YBL104C	SEA4	Subunit of SEACAT, a subcomplex of the SEA complex; Sea4p, along with Rtc1p and Mtc5p, redundantly inhibit the TORC1 inhibitory role of the Iml1p/SEACIT (Iml1p-Npr2p-Npr3p) subcomplex, a GAP for GTPase Gtr1p (EGOC subunit) in response to amino acid limitation, thereby resulting in activation of TORC1 signaling; SEA is a coatomer-related complex that associates dynamically with the vacuole; contai…	IV	2.24927	0.966004	-0.684963	-1.84914	-2.84914	-4.28149	0	0	UGUACAAUAA			II	5820	618	9680	1196	2141	261	5	0.025	24.2541	1.07578	cytoplasm
YKL186C	MTR2	mRNA transport regulator; essential nuclear protein; Mex67p and Mtr2p form a mRNA export complex which binds to RNA	IV	0.805489	-0.088524	-0.346993	-0.346993	-0.516918	0	0	0	UAUAUAGAAA			IV	864	5	2112	76	304	6	4	0.021	76.0715	3.37412	nuclear periphery
YLR197W	NOP56	Essential evolutionarily-conserved nucleolar protein; component of the box C/D snoRNP complexes that direct 2'-O-methylation of pre-rRNA during its maturation; overexpression causes spindle orientation defects	IV	1.48082	1.09631	0.961901	-0.684963	-1.33685	-3.2815	-3.2815	0	UGUAUAUUUA			II	1763	143	61608	89	576	9	4	NA	626.338	27.781	nucleolus
YCR057C	PWP2	Conserved 90S pre-ribosomal component; essential for proper endonucleolytic cleavage of the 35 S rRNA precursor at A0, A1, and A2 sites; contains eight WD-repeats; PWP2 deletion leads to defects in cell cycle and bud morphogenesis	IV	1.56329	0.911476	0.039619	-2.39441	-2.84914	-4.28149	0	0	UGUAUUUAAU		II	II	181	23	671	120	59	14	3	-0.217	130.983	5.80971	nucleolus
YER043C	SAH1	S-adenosyl-L-homocysteine hydrolase; catabolizes S-adenosyl-L-homocysteine which is formed after donation of the activated methyl group of S-adenosyl-L-methionine (AdoMet) to an acceptor; regulates cellular lipid homoeostasis by regulating phosphatidylcholine(PC)synthesis and triacylglycerol (TG) levels	IV	2.38312	1.1772	-1.14473	-2.14473	-2.51692	0	0	0	UAUAUAAUAA	III	III	II	1181	22	4212	9	535	0	6	NA	1113.29	49.3794	cytoplasm
YPL232W	SSO1	Plasma membrane t-SNARE; involved in fusion of secretory vesicles at the plasma membrane and in vesicle fusion during sporulation; forms a complex with Sec9p that binds v-SNARE Snc2p; syntaxin homolog; functionally redundant with Sso2p; SSO1 has a paralog, SSO2, that arose from the whole genome duplication	IV	1.78594	0.241359	-0.064965	-0.064965	-1.84914	-3.2815	0	0	UGUAUAUCAA			II	456	66	1612	606	201	20	6	-0.79	96.3359	4.27295	lipid particle
YDR190C	RVB1	ATP-dependent DNA helicase, also known as pontin; member of the AAA+ and RuvB-like protein families; similar to Rvb2p; conserved component of multiple complexes including the INO80 complex, the Swr1 complex, and the R2TP complex (Rvb1-Rvb2-Tah1-Pih1); involved in multiple processes such as chromatin remodeling, box C/D snoRNP assembly, and RNA polymerase II assembly	IV	2.13387	1.48594	-1.2815	-1.47414	0	0	0	0	UAUAUAUUAG		II	II	581	27	1818	1071	109	16	5	NA	141.815	6.29014	nucleus
YMR189W	GCV2	P subunit of the mitochondrial glycine decarboxylase complex; glycine decarboxylase is required for the catabolism of glycine to 5,10-methylene-THF; expression is regulated by levels of 5,10-methylene-THF in the cytoplasm	IV	2.04698	1.50715	1.15086	0.338562	-3.2815	0	0	0	UGUAUAUUAG			III	39923	52	61608	95	10714	1	7	0.048	61.7782	2.74015	mitochondrion
YER131W	RPS26B	Protein component of the small (40S) ribosomal subunit; homologous to mammalian ribosomal protein S26, no bacterial homolog; RPS26B has a paralog, RPS26A, that arose from the whole genome duplication	IV	2.24305	1.29988	0.278668	-0.424075	-2.14473	-2.51692	-3.51692	0	UGUAUUUUAA	IV	II	II	2008	785	4228	239	766	35	5	NA	2605.74	115.577	cytoplasm
YBR167C	POP7	Subunit of both RNase MRP and nuclear RNase P; forms a soluble heterodimer with Pop6p that binds P3 domain of RNase MRP and RNase P RNAs; RNase MRP cleaves pre-rRNA, while nuclear RNase P cleaves tRNA precursors to generate mature 5' ends and facilitates turnover of nuclear RNAs	IV	1.76452	1.26943	0.525278	-0.327824	-3.2815	-4.28149	0	0	UGUAUACUAU			II	7713	44	10458	72	1642	3	4	-0.734	36.7394	1.62957	nucleus
YKL006C-A	SFT1	Intra-Golgi v-SNARE; required for transport of proteins between an early and a later Golgi compartment	IV	1.67917	0.713632	0.407552	-2.2815	0	0	0	0	UGUACAUAGA	IV		III	51	2966	746	2840	27	481	7	-0.837	33.647	1.4924	cytoplasm,nucleus
YGL048C	RPT6	ATPase of the 19S regulatory particle of the 26S proteasome; one of six ATPases of the regulatory particle; involved in the degradation of ubiquitinated substrates; bound by ubiquitin-protein ligases Ubr1p and Ufd4p; localized mainly to the nucleus throughout the cell cycle; protein abundance increases in response to DNA replication stress	IV	1.56841	0.735824	0.124037	-0.945695	-1.93196	0	0	0	UGUAUAAUAU		III	III	44473	4	67522	112	9264	1	7	NA	203.681	9.03422	nucleus
YER056C-A	RPL34A	Ribosomal 60S subunit protein L34A; homologous to mammalian ribosomal protein L34, no bacterial homolog; RPL34A has a paralog, RPL34B, that arose from the whole genome duplication	IV	1.38174	0.749176	0.07566	0.07566	0	0	0	0	UGUACCUAAU	IV	II	II	82	1	356	166	22	143	0	NA	934.198	41.436	cytoplasm
YER030W	CHZ1	Histone chaperone for Htz1p/H2A-H2B dimer; required for the stabilization of the Chz1p-Htz1-H2B complex; has overlapping function with Nap1p; null mutant displays weak sensitivity to MMS and benomyl; contains a highly conserved CHZ motif; protein abundance increases in response to DNA replication stress	IV	2.26312	0.434939	-0.203218	-0.38502	-1.84914	-2.51692	-2.51692	0	UGUAUAUAAA	IV	I	III	5022	0	11790	31	1839	1	6	-0.58	116.965	5.18795	nucleus
YOL147C	PEX11	Peroxisomal protein required for medium-chain fatty acid oxidation; also required for peroxisome proliferation, possibly by inducing membrane curvature; localization regulated by phosphorylation; transcription regulated by Adr1p and Pip2p-Oaf1p	IV	0.931282	0.284564	0.017719	-0.59308	-1.67349	-2.14473	0	0	UGUAUAUGAC	IV	IV	III	407	4	1686	63	62	1	10	-0.399	30.0382	1.33234	peroxisome
YGR240C	PFK1	Alpha subunit of heterooctameric phosphofructokinase; involved in glycolysis, indispensable for anaerobic growth, activated by fructose-2,6-bisphosphate and AMP, mutation inhibits glucose induction of cell cycle-related genes	IV	0.686128	0.21618	-0.527211	-1.53758	-2.84914	0	0	0	UGUACGAUAU			III	1029	38	1722	165	243	78	6	NA	718.72	31.8786	cytoplasm
YOR209C	NPT1	Nicotinate phosphoribosyltransferase; acts in the salvage pathway of NAD+ biosynthesis; required for silencing at rDNA and telomeres and has a role in silencing at mating-type loci; localized to the nucleus	IV	0.658088	-0.414491	-0.796941	-0.931956	-0.931956	-0.931956	0	0	UGUAUAAUAG		IV	III	44473	77	67522	200	12843	5	5	0.108	208.706	9.25708	cytoplasm,nucleus
YOR091W	TMA46	Protein of unknown function that associates with translating ribosomes; interacts with GTPase Rbg1p	IV	0.867564	0.130598	-0.169642	-0.59308	-4.28149	-4.28149	-4.28149	-4.28149	UAUAUAAUAC	III	IV	III	1181	1	4212	47	90	0	4	0.067	138.652	6.14985	cytoplasm
YBR035C	PDX3	Pyridoxine (pyridoxamine) phosphate oxidase; has homologs in E. coli and Myxococcus xanthus; transcription is under the general control of nitrogen metabolism	IV	2.12896	1.01813	0.103391	-0.570373	-1.77082	-4.28149	-4.28149	0	UGUAUAAUGA			II	1634	51	67522	94	480	4	6	-0.729	133.943	5.94101	NA
YHR142W	CHS7	Protein of unknown function; may be involved in chitin biosynthesis by regulation of Chs3p export from the ER; relocalizes from bud neck to ER upon DNA replication stress	IV	1.42932	0.493896	-0.229168	-1.19499	-3.51692	0	0	0	UGUACACUUU		IV	II	48	4	1308	35	1	3	6	0.142	62.329	2.76458	ambiguous,bud neck,cytoplasm,vacuole,bud
YGR282C	BGL2	Endo-beta-1,3-glucanase; major protein of the cell wall, involved in cell wall maintenance; involved in incorporation of newly synthesized mannoprotein molecules into the cell wall	IV	1.79678	0.822274	0.177196	-1.67349	0	0	0	0	UGUAUACUUU	IV	II	III	513	35	10458	262	83	8	5	NA	743.793	32.9907	vacuole
YJL111W	CCT7	Subunit of the cytosolic chaperonin Cct ring complex; related to Tcp1p, required for the assembly of actin and tubulins in vivo; mutant has increased aneuploidy tolerance	IV	1.27275	0.571108	-0.684963	-1.26418	-1.45436	-3.51692	0	0	UGUAUCUUAA		IV	III	461	6	987	60	213	12	6	0.242	160.434	7.11598	NA
YLR249W	YEF3	Translation elongation factor 3; contains two ABC cassettes; binds and hydrolyzes ATP; YEF3 has a paralog, HEF3, that arose from the whole genome duplication	IV	2.49659	1.81163	0.595585	-2.2815	-3.2815	0	0	0	UGUAUAUUUU		II	II	1763	2	61608	22	286	0	3	NA	4782.61	212.131	cytoplasm
YBR067C	TIP1	Major cell wall mannoprotein with possible lipase activity; transcription is induced by heat- and cold-shock; member of the Srp1p/Tip1p family of serine-alanine-rich proteins	IV	1.10672	0.061191	-0.721332	-1.60393	-1.60393	-1.84914	-3.51692	-3.51692	UAUAUAUUAU		II	III	581	93	1818	575	99	17	0	NA	291.008	12.9076	ER
YNL138W	SRV2	CAP (cyclase-associated protein); N-terminus binds adenylate cyclase and facilitates activation by RAS; N-terminus forms novel hexameric star-shaped shuriken structures that directly catalyze cofilin-mediated severing of actin filaments; C-terminus, in physically and genetically separate activity, binds and recycles cofilin bound, ADP-actin monomers, facilitating regulation of actin dynamics and …	IV	1.79034	0.124037	-1.19499	-1.93196	0	0	0	0	UGUAACCUUU		III	III	943	42	3581	456	139	4	3	NA	173.694	7.70413	actin
YDL086W		Putative carboxymethylenebutenolidase; the authentic, non-tagged protein is detected in highly purified mitochondria in high-throughput studies; YDL086W is not an essential gene	IV	0.973324	0.054305	-0.356138	-3.2815	-4.28149	0	0	0	UGUACACGCU	IV	IV	III	1	238	38	207	0	7	5	-0.243	83.5717	3.7068	NA
YGL101W		Protein of unknown function; non-essential gene; interacts with the DNA helicase Hpr5p; YGL101W has a paralog, YBR242W, that arose from the whole genome duplication	IV	1.98647	-0.219816	-1.77082	-2.84914	0	0	0	0	UGUAUAUUAU		II	II	39923	912	61608	3810	7219	477	6	0.256	79.6302	3.53197	cytoplasm,nucleus
YDR037W	KRS1	Lysyl-tRNA synthetase	IV	0.315037	-1.60393	-3.2815	-3.2815	0	0	0	0	UGUAUAAUGU			II	1634	26	67522	68	866	1	6	NA	802.464	35.593	NA
YGL083W	SCY1	Putative kinase; suppressor of GTPase mutant; similar to bovine rhodopsin kinase; may have a role in intracellular sterol transport	IV	0.278668	0.278668	-2.51692	0	0	0	0	0	UGUACCUUAG		IV	IV	387	6	1053	35	53	0	6	0.239	21.8841	0.970663	late Golgi
YLR418C	CDC73	Component of the Paf1p complex; binds to and modulates the activity of RNA polymerases I and II; required for expression of certain genes, modification of some histones, and telomere maintenance; involved in transcription elongation as demonstrated by the G-less-based run-on (GLRO) assay; protein abundance increases in response to DNA replication stress; human homologue, parafibromin, is a tumour…	IV	0.90766	0.103391	-0.454364	-1.77082	-3.51692	0	0	0	UGUAAACUAU		II	III	30088	14	46976	52	6927	6	5	0.335	39.0836	1.73354	nucleus
YMR241W	YHM2	Citrate and oxoglutarate carrier protein; exports citrate from and imports oxoglutarate into the mitochondrion, causing net export of NADPH reducing equivalents; also associates with mt nucleoids and has a role in replication and segregation of the mt genome	IV	0.170844	-0.454364	-1.84914	-2.51692	-3.51692	0	0	0	UGUACUAUAA		II	II	2809	10	4693	105	1131	0	5	NA	199.736	8.85922	mitochondrion
YMR123W	PKR1	V-ATPase assembly factor; functions with other V-ATPase assembly factors in the ER to efficiently assemble the V-ATPase membrane sector (V0); protein abundance increases in response to DNA replication stress	IV	1.32399	-0.336848	-1.53758	-2.04918	-2.04918	-4.28149	0	0	UGUAAAUUUU		I	II	3243	50	83390	19	554	2	6	-0.604	164.181	7.28217	ER
YDR341C		Arginyl-tRNA synthetase; the authentic, non-tagged protein is detected in highly purified mitochondria in high-throughput studies; YDR341C has a paralog, MSR1, that arose from the whole genome duplication	IV	1.61264	0.089198	-3.2815	-4.28149	0	0	0	0	UGUAUAAACG		IV	IV	1265	44	10809	699	112	125	6	NA	344.397	15.2756	NA
YGL197W	MDS3	Putative component of the TOR regulatory pathway; negative regulator of early meiotic gene expression; required, with Pmd1p, for growth under alkaline conditions; has an N-terminal kelch-like domain; MDS3 has a paralog, PMD1, that arose from the whole genome duplication	IV	1.34139	0.770832	-1.69653	0	0	0	0	0	UAUAAAGUUC			IV	205	11	1527	45	33	2	4	-0.156	31.4728	1.39596	cytoplasm
YLR072W	LAM6	Sterol transporter that transfers sterols between membranes; may coordinate mitochondrial and vacuolar function; localizes to ER-mitochondrial contact sites in a Tom70p- and Tom71p-dependent manner; mitochondrial localization requires GRAM domain; also localizes to ER-vacuole contact sites, in a Vac8p-dependent manner; has GRAM and StART-like (VASt) domains; one of six StART-like domain-containin…	IV	1.34139	0.047386	-0.336848	-2.14473	-2.14473	-2.14473	-2.14473	-2.84914	UGUAAUAUUG			IV	1703	0	25034	59	288	0	6	0.004	16.8276	0.746384	mitochondrion,punctate composite
YPR033C	HTS1	Cytoplasmic and mitochondrial histidine tRNA synthetase; efficient mitochondrial localization requires both a presequence and an amino-terminal sequence; mutations in human ortholog HARS2 are associated with Perrault syndrome	IV	0.639267	0.209996	-2.69653	0	0	0	0	0	UGUAUAAUGA		IV	III	1634	20	67522	16	480	0	7	NA	305.416	13.5466	cytoplasm
YDR451C	YHP1	Homeobox transcriptional repressor; binds Mcm1p and early cell cycle box (ECB) elements of cell cycle regulated genes, thereby restricting ECB-mediated transcription to the M/G1 interval; YHP1 has a paralog, YOX1, that arose from the whole genome duplication	IV	1.73126	0.039619	-0.889953	-1.45436	-3.2815	0	0	0	UGUACAAAAA		II	II	538	259	1294	236	115	13	4	-0.116	28.4903	1.26368	nucleus
YDR430C	CYM1	Lysine-specific metalloprotease of the pitrilysin family; metalloprotease of the intermembrane space; degrades proteins and presequence peptides cleaved from imported proteins; required for normal mitochondrial morphology	IV	1.35018	-1.60393	-2.51692	-3.51692	0	0	0	0	UGUAAAUAUA	II	IV	II	4004	4	18934	6	1061	0	14	-0.389	36.2181	1.60644	mitochondrion
YLR268W	SEC22	R-SNARE protein; assembles into SNARE complex with Bet1p, Bos1p and Sed5p; cycles between the ER and Golgi complex; involved in anterograde and retrograde transport between the ER and Golgi; synaptobrevin homolog	IV	0.690575	0.130598	-0.346993	-2.51692	0	0	0	0	UGUGUAUUAA		IV	III	468	27	918	308	136	15	5	-0.003	95.7313	4.24613	Golgi
YPR129W	SCD6	Repressor of translation initiation; binds eIF4G through its RGG domain and inhibits recruitment of the preinitiation complex; also contains an Lsm domain; may have a role in RNA processing; overproduction suppresses null mutation in clathrin heavy chain gene CHC1; forms cytoplasmic foci upon DNA replication stress	IV	1.55571	-0.088524	-1.03442	-2.14473	0	0	0	0	UGUAAAUUAA			III	47241	56	83390	67	16322	2	9	-0.028	106.981	4.74509	cytoplasm
YBR111C	YSA1	Nudix hydrolase family member with ADP-ribose pyrophosphatase activity; shown to metabolize O-acetyl-ADP-ribose to AMP and acetylated ribose 5'-phosphate	IV	0.590834	0.061191	0.061191	-2.69653	-2.69653	-2.69653	0	0	UGUAUGAAAA			IV	154	9	486	119	46	2	2	NA	128.609	5.70443	cytoplasm,nucleus
YDR170C	SEC7	Guanine nucleotide exchange factor (GEF) for ADP ribosylation factors; involved in proliferation of the Golgi, intra-Golgi transport and ER-to-Golgi transport; found in the cytoplasm and on Golgi-associated coated vesicles	IV	2.37469	0.672176	-0.356138	-3.51692	-3.51692	-3.51692	-3.51692	-3.51692	UGUAAACUAU			II	30088	7	46976	8	6927	0	7	-0.323	116.384	5.16217	late Golgi
YJL008C	CCT8	Subunit of the cytosolic chaperonin Cct ring complex; related to Tcp1p, required for the assembly of actin and tubulins in vivo	IV	0.620198	-0.211493	-0.809447	-2.84914	-4.28149	0	0	0	UGUAUAGUAG			II	3732	0	5569	84	872	0	8	NA	233.956	10.377	NA
YBR081C	SPT7	Subunit of the SAGA transcriptional regulatory complex; involved in proper assembly of the complex; also present as a C-terminally truncated form in the SLIK/SALSA transcriptional regulatory complex	IV	1.38449	-0.673487	-1.45436	-1.84914	0	0	0	0	UGUACUAUUU		III		170	12	4693	22	17	0	5	-0.299	24.2949	1.07759	nucleus
YHR099W	TRA1	Subunit of SAGA and NuA4 histone acetyltransferase complexes; interacts with acidic activators (e.g., Gal4p) which leads to transcription activation; similar to human TRRAP, which is a cofactor for c-Myc mediated oncogenic transformation	IV	1.40994	0.456602	-1.39441	-2.39441	-3.51692	-3.51692	0	0	UGUACUAUAU		III	II	2809	6	4693	23	543	1	8	-0.602	62.2227	2.75987	NA
YBR260C	RGD1	GTPase-activating protein (RhoGAP) for Rho3p and Rho4p; possibly involved in control of actin cytoskeleton organization	IV	1.53054	-0.327824	-4.28149	0	0	0	0	0	UGUACAAUAA		II	III	5820	2	9680	201	2141	14	4	0.331	30.3534	1.34632	ambiguous,bud neck,cytoplasm,bud
YHR165C	PRP8	Component of U4/U6-U5 snRNP complex; involved in second catalytic step of splicing; participates in spliceosomal assembly through its interaction with U1 snRNA; largest and most evolutionarily conserved protein of the spliceosome; mutations in its human ortholog, PRPF8, cause Retinitis pigmentosa and missplicing in Myelodysplastic syndrome.	IV	1.10339	0.00349	-0.862108	-2.39441	-3.2815	0	0	0	UGUAUAAUAU			II	44473	83	67522	219	9264	8	5	-0.394	54.1404	2.40138	cytoplasm,nucleus
YER117W	RPL23B	Ribosomal 60S subunit protein L23B; homologous to mammalian ribosomal protein L23 and bacterial L14; RPL23B has a paralog, RPL23A, that arose from the whole genome duplication	IV	1.16409	-0.237594	-1.45436	-1.93196	-1.93196	-1.93196	-1.93196	-2.51692	UGUAACCUUU		II	II	943	128	3581	104	139	12	3	NA	864.901	38.3624	nucleus
YGR285C	ZUO1	Ribosome-associated chaperone; zuotin functions in ribosome biogenesis and, in partnership with Ssz1p and SSb1/2, as a chaperone for nascent polypeptide chains; contains a DnaJ domain and functions as a J-protein partner for Ssb1p and Ssb2p	IV	0.472789	0.177196	-0.38502	-2.39441	0	0	0	0	UGUAUACGAA	III	III	III	106	73	273	286	31	3	5	NA	790.905	35.0803	cytoplasm
YGL133W	ITC1	Subunit of ATP-dependent Isw2p-Itc1p chromatin remodeling complex; required for repression of a-specific genes, repression of early meiotic genes during mitotic growth, and repression of INO1; similar to mammalian Acf1p, the regulatory subunit of the mammalian ATP-utilizing chromatin assembly and modifying factor (ACF) complex; ITC1 has a paralog, YPL216W, that arose from the whole genome duplica…	IV	2.23493	0.713122	0.483082	-3.51692	0	0	0	0	UGUAACUGAU		III	IV	258	93	1392	17677	107	5432	7	-0.374	15.677	0.69535	nucleus
YGL031C	RPL24A	Ribosomal 60S subunit protein L24A; not essential for translation but may be required for normal translation rate; homologous to mammalian ribosomal protein L24, no bacterial homolog; RPL24A has a paralog, RPL24B, that arose from the whole genome duplication	IV	0.995902	-0.527211	-1.77082	-2.39441	-2.84914	-2.84914	-3.51692	-3.51692	UGUAUAAUUC			II	2580	104	67522	405	155	70	6	NA	2871.34	127.357	cytoplasm
YPR124W	CTR1	High-affinity copper transporter of the plasma membrane; mediates nearly all copper uptake under low copper conditions; transcriptionally induced at low copper levels and degraded at high copper levels; protein increases in abundance and relocalizes from nucleus to plasma membrane upon DNA replication stress	IV	0.958216	0.488797	-1.11157	-4.28149	-4.28149	0	0	0	UGUAUAUAGU	II		III	1090	48	11790	270	227	5	9	0.143	56.1302	2.48964	cell periphery,bud
YLR303W	MET17	O-acetyl homoserine-O-acetyl serine sulfhydrylase; required for Methionine and cysteine biosynthesis	IV	0.575925	-1.00368	-4.28149	0	0	0	0	0	UGUAUAAACC		I	IV	1265	18	10809	44	419	0	4	NA	241.197	10.6982	NA
YOR194C	TOA1	TFIIA large subunit; involved in transcriptional activation, acts as antirepressor or as coactivator; required, along with Toa2p, for ribosomal protein gene transcription in vivo; homologous to largest and second largest subunits of human and Drosophila TFIIA	IV	1.45921	0.00349	-0.527211	-2.39441	0	0	0	0	UGUACUUUAA			III	450	1	1164	29	149	0	5	-0.214	16.1323	0.715542	NA
YDR210W		Predicted tail-anchored plasma membrane protein; contains a conserved CYSTM module; related proteins in other organisms may be involved in response to stress; green fluorescent protein (GFP)-fusion protein localizes to the cell periphery	IV	0.124037	-1.51692	-1.51692	-1.51692	-1.51692	0	0	0	UGUAUAUAAU	IV			5022	8	11790	16	1322	19	0	0.059	185.763	8.23944	cell periphery
YPL107W		Putative protein of unknown function; green fluorescent protein (GFP)-fusion protein localizes to mitochondria; YPL107W is not an essential gene	IV	0.254137	0.144391	-0.889953	-2.51692	-2.51692	0	0	0	UGUACAAUAU			III	5820	0	9680	189	1189	7	7	-0.424	11.9128	0.528389	mitochondrion
YNL135C	FPR1	Peptidyl-prolyl cis-trans isomerase (PPIase); binds to the drugs FK506 and rapamycin; also binds to the nonhistone chromatin binding protein Hmo1p and may regulate its assembly or function; N-terminally propionylated in vivo	IV	1.14439	-1.09617	-2.2815	-2.2815	-2.2815	-2.2815	0	0	UGUAUGAUAU			IV	1612	98	2968	100	285	6	8	NA	911.486	40.4287	cytoplasm,nucleus
YDR238C	SEC26	Essential beta-coat protein of the COPI coatomer; involved in ER-to-Golgi protein trafficking and maintenance of normal ER morphology; shares 43% sequence identity with mammalian beta-coat protein (beta-COP)	IV	2.01062	-0.809447	-1.77082	-3.2815	-3.2815	0	0	0	UGUACAUUUU			III	110	9	5067	1574	13	536	8	0.023	203.175	9.01175	Golgi,early Golgi
YPL215W	CBP3	Mitochondrial protein required for assembly of cytochrome bc1 complex; forms a complex with Cbp6p that binds to mt ribosomes near the polypeptide tunnel exit and promotes efficient translation of the COB mRNA; Cbp3p-Cbp6p complex also interacts with newly synthesized cytochrome b (Cobp) and Cbp4p to promote assembly of Cobp into the cytochrome bc1 complex; Cbp3p-Cbp6p complex is sequestered if as…	IV	1.31182	-0.403861	-3.51692	-3.51692	-3.51692	0	0	0	UGUAUAAUAG	II		IV	44473	34	67522	67	12843	4	16	-0.06	44.7644	1.98551	mitochondrion
YPL125W	KAP12	Karyopherin responsible for the nuclear import of Rpf1p; Rpf1p is a ribosome maturation factor	IV	1.53025	0.110047	-0.63829	-1.77082	-3.51692	0	0	0	UGUAUAUAGU			III	1090	80	11790	85	227	1	3	-0.046	41.7911	1.85363	cytoplasm,nucleus
YMR276W	DSK2	Nuclear-enriched ubiquitin-like polyubiquitin-binding protein; required for spindle pole body (SPB) duplication and for transit through the G2/M phase of the cell cycle; involved in proteolysis; interacts with the proteasome; protein abundance increases in response to DNA replication stress	IV	1.3645	0.788022	-0.229168	-2.69653	0	0	0	0	UGUAUCCAUC		IV	IV	57	323	252	275	20	17	7	NA	173.803	7.70897	cytoplasm,nucleus
YHR073W	OSH3	Member of an oxysterol-binding protein family; this family has seven members in S. cerevisiae; family members have overlapping, redundant functions in sterol metabolism and collectively perform a function essential for viability; contains FFAT motif; interacts with ER anchor Scs2p at patches at the plasma membrane; regulated by sterol binding	IV	0.296967	-1.21149	-1.39441	-3.51692	-3.51692	0	0	0	UGUAUAGUAU		IV	III	3732	3	5569	63	726	1	8	-0.349	54.495	2.41711	ambiguous
YCL017C	NFS1	Cysteine desulfurase; involved in iron-sulfur cluster (Fe/S) biogenesis and in thio-modification of mitochondrial and cytoplasmic tRNAs; essential protein located predominantly in mitochondria	IV	1.1772	0.895703	-1.39441	-2.84914	-3.51692	0	0	0	UGUACAAAUA	III		III	296	754	1294	1135	86	104	11	0.017	94.2044	4.17841	mitochondrion
YDL201W	TRM8	Noncatalytic subunit of a tRNA methyltransferase complex; Trm8p and Trm82p comprise an enzyme that catalyzes a methyl-transfer from S-adenosyl-l-methionine to the N(7) atom of guanine at position 46 in tRNA; Trm8 lacks catalytic activity if not bound to Trm82p	IV	1.24776	0.190553	-1.16067	-2.69653	-2.69653	0	0	0	UGUAUAGUAA		III	II	3732	24	5569	202	1514	26	6	-0.313	139.465	6.18592	nucleus
YGR082W	TOM2	Component of the TOM (translocase of outer membrane) complex; responsible for recognition and initial import steps for all mitochondrially directed proteins; acts as a receptor for incoming precursor proteins	IV	2.05603	0.708743	-1.31886	-2.51692	-2.51692	0	0	0	UGUAUAUAGC	I		III	1090	20	11790	508	80	42	12	-0.202	181.442	8.04779	mitochondrion
YGL153W	PEX14	Central component of the peroxisomal importomer complex; peroxisomal protein import machinery docking complex component; interacts with both PTS1 (Pex5p) and PTS2 (Pex7p) peroxisomal matrix protein signal recognition factors and membrane receptor Pex13p	IV	1.74466	-0.862108	-1.95957	-2.2815	0	0	0	0	UGUAAGUAAU		I	IV	149	14	468	478	44	46	6	-0.012	21.8903	0.970935	peroxisome
YPR034W	ARP7	Component of both the SWI/SNF and RSC chromatin remodeling complexes; actin-related protein involved in transcriptional regulation	IV	0.054305	-0.862108	-1.53758	0	0	0	0	0	UGUAUAAAUA			III	2776	41	10809	16	754	34	8	0.181	50.5846	2.24366	nucleus
YDR354W	TRP4	Anthranilate phosphoribosyl transferase; transferase of the tryptophan biosynthetic pathway; catalyzes the phosphoribosylation of anthranilate; subject to the general control system of amino acid biosynthesis	IV	0.434939	0.434939	-2.2815	-2.2815	0	0	0	0	UGUACUAAGC				23	68	488	83	1	0	4	0.144	67.5488	2.99611	cytoplasm,nucleus
YDR007W	TRP1	Phosphoribosylanthranilate isomerase; catalyzes the third step in tryptophan biosynthesis; in 2004, the sequence of TRP1 from strain S228C was updated by changing the previously annotated internal STOP (TAA) to serine (TCA)	IV	1.68613	0.509672	-0.903296	-2.84914	-4.28149	-4.28149	-4.28149	0	UGUAAAAUAA			III	62281	10944	107890	2781	20999	508	4	NA	55.7605	2.47324	cytoplasm,nucleus
YCR088W	ABP1	Actin-binding protein of the cortical actin cytoskeleton; important for activation of the Arp2/3 complex that plays a key role actin in cytoskeleton organization; inhibits barbed-end actin filament elongation; phosphorylation within its Proline-Rich Regio, mediated by Cdc28p and Pho85p, protects Abp1p from proteolysis mediated by its own PEST sequences; mammalian homologue of HIP-55 (hematopoieti…	IV	1.29371	1.03962	-1.31886	-4.28149	0	0	0	0	UGUAUAGAUU			III	537	9	1445	24	46	1	6	0.005	166.523	7.38609	actin
YHR120W	MSH1	DNA-binding protein of the mitochondria; involved in repair of mitochondrial DNA; has ATPase activity and binds to DNA mismatches; has homology to E. coli MutS; transcription is induced during meiosis	IV	1.15086	0.783865	-1.45436	-1.84914	-3.51692	0	0	0	UGUAUAUAAU		III	IV	5022	308	11790	194	1322	34	11	-0.627	20.7838	0.92186	mitochondrion
YER089C	PTC2	Type 2C protein phosphatase (PP2C); dephosphorylates Hog1p to limit maximal osmostress induced kinase activity; dephosphorylates Ire1p to downregulate the unfolded protein response; dephosphorylates Cdc28p; inactivates the DNA damage checkpoint; PTC2 has a paralog, PTC3, that arose from the whole genome duplication	IV	0.296967	-1.14473	-1.14473	-3.2815	0	0	0	0	UAUAUACAUA		II		20	3	116	63	3	2	4	0.559	97.1134	4.30743	cytoplasm,nucleus
YFR013W	IOC3	Subunit of the Isw1a complex; Isw1a has nucleosome-stimulated ATPase activity and represses transcription initiation by specific positioning of a promoter proximal dinucleosome; promotes nucleosome shifts in the 5 prime direction; IOC3 has a paralog, ESC8, that arose from the whole genome duplication	IV	0.338562	-0.365342	-0.570373	0	0	0	0	0	UGUAAAAUUA		II	IV	5061	0	107890	201	1277	1	3	-0.347	42.7601	1.89661	nucleus
YBR126W-B		Dubious open reading frame; unlikely to encode a functional protein, based on available experimental and comparative sequence data; partially overlaps the dubious ORF YBR126W-A; identified by SAGE	IV	0.672176	-0.433724	-0.733197	0	0	0	0	0	UGUAGACAUC			III	59	87	409	320	6	20	#N/A	NA	40.2605	1.78574	NA
YBL063W	KIP1	Kinesin-related motor protein; required for mitotic spindle assembly, chromosome segregation, and 2 micron plasmid partitioning; functionally redundant with Cin8p for chromosomal but not plasmid functions	IV	2.07376	-0.696532	-1.95957	-1.95957	-1.95957	-2.2815	0	0	UGUAAAAUAU		IV	II	62281	434	107890	1389	13320	198	4	-0.171	13.618	0.604024	microtubule
YDR064W	RPS13	Protein component of the small (40S) ribosomal subunit; homologous to mammalian ribosomal protein S13 and bacterial S15	IV	0.735824	0.488797	-0.39441	-1.45436	-4.28149	-4.28149	0	0	UGUAUAUUUU		II	II	1763	4	61608	171	286	3	4	NA	1994.6	88.47	NA
YDL145C	COP1	Alpha subunit of COPI vesicle coatomer complex; complex surrounds transport vesicles in the early secretory pathway	IV	0.540717	-2.69653	0	0	0	0	0	0	UGUAAUUAAC			IV	344	28	1257	26	55	3	8	-0.14	254.577	11.2917	Golgi,early Golgi
YOR335C	ALA1	Cytoplasmic and mitochondrial alanyl-tRNA synthetase; required for protein synthesis; point mutation (cdc64-1 allele) causes cell cycle arrest at G1; lethality of null mutation is functionally complemented by human homolog AARS; mutations in human homolog AARS are associated with autoimmune disease polymyositis/dermatomyositis	IV	1.03654	-0.959567	-3.2815	-4.28149	-4.28149	-4.28149	-4.28149	0	UGUAUAAUUA		II	III	2580	5	67522	910	737	108	12	NA	486.189	21.5647	cytoplasm
YER063W	THO1	Conserved nuclear RNA-binding protein; specifically binds to transcribed chromatin in a THO- and RNA-dependent manner, genetically interacts with shuttling hnRNP NAB2; overproduction suppresses transcriptional defect caused by hpr1 mutation	IV	0.643862	-1.04918	0	0	0	0	0	0	UGUAUAUGAA		III	IV	407	27	1686	165	156	4	6	0.127	91.1512	4.04298	nucleus

## Sheet: GO Analyses
All Puf4p targets, Biological Process			All Puf4p targets, Cellular component			Class I Puf4p targets, Biological Process			Class I Puf4p targets, Cellular component			Class II Puf4p targets, Biological Process			Class II Puf4p targets, Cellular component			Class III Puf4p targets, Biological Process			Class III Puf4p targets, Cellular component			Class IV Puf4p targets, Biological Process			Class IV Puf4p targets, Cellular component
GO Term	p-value		GO Term	p-value		GO Term	p-value		GO Term	p-value		GO Term	p-value		GO Term	p-value		GO Term	p-value		GO Term	p-value		GO Term	p-value		GO Term	p-value
ribonucleoprotein complex biogenesis	1.50011e-43		preribosome	2.03147e-42		ribosome biogenesis	1.15189e-36		nucleolus	2.44391e-33		ribonucleoprotein complex biogenesis	9.95179e-11		preribosome	3.90636e-11		ribonucleoprotein complex biogenesis	0.000492305		non-membrane-bounded organelle	1.28349e-08		NONE ENRICHED	NA		cytosolic part	8.24503e-06
ribosome biogenesis	5.23188e-42		non-membrane-bounded organelle	9.61896e-38		ribonucleoprotein complex biogenesis	1.4919e-33		preribosome	2.31138e-30		ribosome biogenesis	3.5916e-08		nucleolus	1.04083e-09		ribosome biogenesis	0.00061404		intracellular non-membrane-bounded organelle	1.28349e-08					macromolecular complex	0.000210722
ncRNA metabolic process	6.91089e-32		intracellular non-membrane-bounded organelle	9.61896e-38		ncRNA metabolic process	1.61037e-23		nuclear lumen	6.1855e-24		ncRNA metabolic process	8.74518e-08		intracellular ribonucleoprotein complex	6.98085e-09		rRNA processing	0.00157066		nuclear lumen	4.04057e-05					protein complex	0.00151941
rRNA processing	4.13142e-30		nucleolus	6.97171e-36		rRNA processing	2.34462e-23		non-membrane-bounded organelle	8.99445e-22		gene expression	3.09271e-07		ribonucleoprotein complex	6.98085e-09		rRNA metabolic process	0.00361982		organelle lumen	0.000146598					cell part	0.00207249
rRNA metabolic process	9.03849e-30		nuclear lumen	2.56072e-31		rRNA metabolic process	1.21932e-22		intracellular non-membrane-bounded organelle	8.99445e-22		ncRNA processing	5.08134e-07		preribosome, large subunit precursor	2.93081e-08		ncRNA metabolic process	0.00565625		intracellular organelle lumen	0.000146598					cell	0.00218568
cellular component biogenesis	3.88563e-28		intracellular ribonucleoprotein complex	7.95704e-30		ncRNA processing	1.20616e-19		organelle lumen	3.60784e-21		rRNA processing	1.43566e-06		non-membrane-bounded organelle	8.609e-08		cellular component biogenesis	0.00981313		intracellular ribonucleoprotein complex	0.000349596					intracellular organelle	0.00616647
ncRNA processing	1.29476e-26		ribonucleoprotein complex	7.95704e-30		ribosomal large subunit biogenesis	8.33116e-18		intracellular organelle lumen	3.60784e-21		rRNA metabolic process	3.77442e-06		intracellular non-membrane-bounded organelle	8.609e-08		ncRNA processing	0.013414		ribonucleoprotein complex	0.000349596					organelle	0.00760116
cellular component organization or biogenesis	6.43561e-18		organelle lumen	1.37339e-24		cellular component biogenesis	1.82671e-17		membrane-enclosed lumen	4.6745e-20		cellular nitrogen compound metabolic process	7.93456e-06		nuclear lumen	2.71471e-07		organic cyclic compound metabolic process	0.0352088		membrane-enclosed lumen	0.000741823					intracellular part	0.0111635
RNA processing	9.58395e-18		intracellular organelle lumen	1.37339e-24		RNA processing	4.58287e-14		preribosome, large subunit precursor	1.54739e-19		RNA processing	1.49806e-05		nucleus	5.67336e-07					ribosome	0.00338397					intracellular	0.0153546
ribosomal large subunit biogenesis	1.69405e-17		membrane-enclosed lumen	1.39723e-24		maturation of 5.8S rRNA	5.6834e-13		intracellular ribonucleoprotein complex	2.14433e-19		RNA metabolic process	2.06664e-05		membrane-enclosed lumen	8.02214e-06					cell part	0.00448899
maturation of SSU-rRNA	5.43037e-14		macromolecular complex	2.8279e-24		maturation of 5.8S rRNA from tricistronic rRNA transcript (SSU-rRNA, 5.8S rRNA, LSU-rRNA)	5.6834e-13		ribonucleoprotein complex	2.14433e-19		cellular component biogenesis	9.70833e-05		nuclear part	3.2682e-05					cell	0.00471886
maturation of SSU-rRNA from tricistronic rRNA transcript (SSU-rRNA, 5.8S rRNA, LSU-rRNA)	8.27205e-14		preribosome, large subunit precursor	2.68366e-23		ribosomal small subunit biogenesis	1.84161e-11		nuclear part	1.11703e-15		nucleobase-containing compound metabolic process	0.000253596		organelle lumen	4.49639e-05					nucleolus	0.00898108
ribosomal small subunit biogenesis	8.94289e-14		90S preribosome	7.30247e-19		maturation of LSU-rRNA from tricistronic rRNA transcript (SSU-rRNA, 5.8S rRNA, LSU-rRNA)	5.87507e-11		90S preribosome	8.02779e-13		nitrogen compound metabolic process	0.000300765		intracellular organelle lumen	4.49639e-05					nuclear part	0.016294
gene expression	2.55576e-13		nuclear part	3.58776e-18		maturation of LSU-rRNA	2.08811e-10		macromolecular complex	8.15467e-11		ribosomal large subunit biogenesis	0.00114768		macromolecular complex	0.000380243					preribosome	0.0168857
RNA metabolic process	3.82618e-13		intracellular organelle	1.04494e-15		maturation of SSU-rRNA from tricistronic rRNA transcript (SSU-rRNA, 5.8S rRNA, LSU-rRNA)	2.99444e-10		nucleus	9.8136e-10		cellular aromatic compound metabolic process	0.00154516		intracellular organelle	0.000557133
nucleobase-containing compound metabolic process	8.74522e-13		nucleus	1.63609e-15		maturation of SSU-rRNA	1.18036e-09		small-subunit processome	1.16223e-06		heterocycle metabolic process	0.0021909		organelle	0.000680487
maturation of 5.8S rRNA	1.16083e-12		organelle	2.1964e-15		cleavage involved in rRNA processing	1.1495e-08		intracellular organelle part	3.03259e-06		organic cyclic compound metabolic process	0.00693093		90S preribosome	0.00118038
maturation of 5.8S rRNA from tricistronic rRNA transcript (SSU-rRNA, 5.8S rRNA, LSU-rRNA)	1.16083e-12		cytosolic part	2.51751e-15		RNA metabolic process	1.83278e-08		organelle part	3.83758e-06		nucleic acid metabolic process	0.00925967		eukaryotic translation initiation factor 3 complex	0.00444895
cellular aromatic compound metabolic process	1.43662e-12		cell part	3.82576e-15		cellular component organization or biogenesis	1.41725e-07		intracellular organelle	0.00021389		maturation of SSU-rRNA	0.0131883		multi-eIF complex	0.0254836
organic cyclic compound metabolic process	5.55437e-12		cell	4.56708e-15		nucleobase-containing compound metabolic process	4.24937e-07		organelle	0.000251619		cytoplasmic translation	0.0150472		cytosolic part	0.0386014
heterocycle metabolic process	2.17703e-11		intracellular part	2.40685e-13		endonucleolytic cleavage involved in rRNA processing	9.75816e-07		nucleolar part	0.00267621		primary metabolic process	0.0185657
nucleic acid metabolic process	1.74048e-10		intracellular	7.04603e-13		endonucleolytic cleavage of tricistronic rRNA transcript (SSU-rRNA, 5.8S rRNA, LSU-rRNA)	9.75816e-07		DNA-directed RNA polymerase I complex	0.0235145		cellular component organization or biogenesis	0.0285554
maturation of LSU-rRNA	3.14436e-10		small-subunit processome	4.0217e-11		endonucleolytic cleavage in ITS1 to separate SSU-rRNA from 5.8S rRNA and LSU-rRNA from tricistronic rRNA transcript (SSU-rRNA, 5.8S rRNA, LSU-rRNA)	2.38508e-06		intracellular membrane-bounded organelle	0.0318115
cellular nitrogen compound metabolic process	1.27723e-09		cytosolic ribosome	1.48329e-10		nucleic acid metabolic process	2.46904e-06		membrane-bounded organelle	0.0358835
cleavage involved in rRNA processing	2.03643e-09		intracellular organelle part	1.55801e-10		cellular aromatic compound metabolic process	2.63358e-06
maturation of LSU-rRNA from tricistronic rRNA transcript (SSU-rRNA, 5.8S rRNA, LSU-rRNA)	3.60167e-09		organelle part	3.35895e-10		heterocycle metabolic process	3.76064e-06
nitrogen compound metabolic process	1.15609e-08		ribosome	4.00094e-09		gene expression	6.69421e-06
cytoplasmic translation	2.58755e-07		ribosomal subunit	2.13848e-06		organic cyclic compound metabolic process	1.22914e-05
ribonucleoprotein complex subunit organization	9.73341e-07		cytosolic large ribosomal subunit	2.69691e-06		RNA phosphodiester bond hydrolysis	3.97032e-05
endonucleolytic cleavage in ITS1 to separate SSU-rRNA from 5.8S rRNA and LSU-rRNA from tricistronic rRNA transcript (SSU-rRNA, 5.8S rRNA, LSU-rRNA)	1.02635e-06		DNA-directed RNA polymerase I complex	7.23552e-06		cellular nitrogen compound metabolic process	0.000872182
ribonucleoprotein complex assembly	1.94489e-06		large ribosomal subunit	6.6553e-05		ribosomal subunit export from nucleus	0.00131925
nucleocytoplasmic transport	9.68644e-06		nucleolar part	0.000131253		establishment of ribosome localization	0.00131925
endonucleolytic cleavage involved in rRNA processing	9.71634e-06		intracellular membrane-bounded organelle	0.00049344		ribosome localization	0.00155822
endonucleolytic cleavage of tricistronic rRNA transcript (SSU-rRNA, 5.8S rRNA, LSU-rRNA)	9.71634e-06		nucleosome	0.000576067		rRNA 5'-end processing	0.00256722
nuclear transport	1.15758e-05		nuclear nucleosome	0.000613089		ncRNA 5'-end processing	0.00256722
rRNA-containing ribonucleoprotein complex export from nucleus	1.91128e-05		membrane-bounded organelle	0.000726702		RNA 5'-end processing	0.00312932
ribosomal subunit export from nucleus	2.008e-05		DNA packaging complex	0.00165545		nitrogen compound metabolic process	0.0037402
establishment of ribosome localization	2.008e-05		protein complex	0.00184926		RNA phosphodiester bond hydrolysis, endonucleolytic	0.00512055
ribonucleoprotein complex export from nucleus	2.13684e-05		preribosome, small subunit precursor	0.0111528		nucleic acid phosphodiester bond hydrolysis	0.00595705
ribosome localization	3.02162e-05		Pwp2p-containing subcomplex of 90S preribosome	0.0174126		rRNA-containing ribonucleoprotein complex export from nucleus	0.0113969
ribonucleoprotein complex localization	3.30514e-05		nuclear DNA-directed RNA polymerase complex	0.0385877		endonucleolytic cleavage in 5'-ETS of tricistronic rRNA transcript (SSU-rRNA, 5.8S rRNA, LSU-rRNA)	0.0267058
rRNA 5'-end processing	4.69655e-05		multi-eIF complex	0.0390495		ribosome assembly	0.035292
ncRNA 5'-end processing	4.69655e-05		cytosol	0.0403047		endonucleolytic cleavage to generate mature 5'-end of SSU-rRNA from (SSU-rRNA, 5.8S rRNA, LSU-rRNA)	0.0382534
cellular macromolecular complex assembly	5.98678e-05
RNA 5'-end processing	7.62651e-05
nuclear export	7.64921e-05
macromolecular complex subunit organization	0.00015397
endonucleolytic cleavage to generate mature 5'-end of SSU-rRNA from (SSU-rRNA, 5.8S rRNA, LSU-rRNA)	0.000251935
macromolecular complex assembly	0.000358548
endonucleolytic cleavage in 5'-ETS of tricistronic rRNA transcript (SSU-rRNA, 5.8S rRNA, LSU-rRNA)	0.000830731
regulation of cellular amide metabolic process	0.00289049
regulation of translation	0.00564696
macromolecule metabolic process	0.006569
cellular component assembly	0.00709329
cellular macromolecule metabolic process	0.00739296
primary metabolic process	0.0098332
nucleobase-containing compound transport	0.0141817
assembly of large subunit precursor of preribosome	0.0153051
RNA phosphodiester bond hydrolysis	0.0186709
posttranscriptional regulation of gene expression	0.0217273
transcription from RNA polymerase I promoter	0.024312
ribosome assembly	0.0361485
