# Supplementary material
Source: HighWire-hosted journal article supplement (doi:10.1101/rna.062687.117)
Supplement: Supplemental_Data_2_PUF5.xlsx [file Supplemental_Data_2_PUF5.xlsx]

## Sheet: Key
Column header	Description
Puf5p target	Systematic name of Puf5p target gene
Name	Name of Puf5p target
Description	Gene description
Class	Puf5p target class for this gene
Mean TRPM U1 (log2)	Mean number of TRPM detected with at least 1 U in the Utag
Mean TRPM U2 (log2)	Mean number of TRPM detected with at least 2 U's in the Utag
Mean TRPM U3 (log2)	Mean number of TRPM detected with at least 3 U's in the Utag
Mean TRPM U4 (log2)	Mean number of TRPM detected with at least 4 U's in the Utag
Mean TRPM U5 (log2)	Mean number of TRPM detected with at least 5 U's in the Utag
Mean TRPM U6 (log2)	Mean number of TRPM detected with at least 6 U's in the Utag
Mean TRPM U7 (log2)	Mean number of TRPM detected with at least 7 U's in the Utag
Mean TRPM U8 (log2)	Mean number of TRPM detected with at least 8 U's in the Utag
Puf3p Target Class	Class of this target in the Puf3p data set
Puf4p Target Class	Class of this target in the Puf4p data set
Puf5p;KOpuf4 Target Class	Class of this target in the Puf5p;KOpuf4 data set
9BE conservation Score	Conservation score of the PBE across 16 yeast species (16 fully conserved, 0 not present in any species)
10BE conservation score	Conservation score of the PBE across 16 yeast species (16 fully conserved, 0 not present in any species)
# of 8BEs via directed search	Number of 8BEs present in the 3' UTR of the target, directed searches via perl regular expressions: TGTA[ATC][ATC]TA
# of 9BEs via directed search	Number of 8BEs present in the 3' UTR of the target, directed searches via perl regular expressions: TGTA[ATC][ATC][ATC]TA
# of 10BEs via directed search	Number of 8BEs present in the 3' UTR of the target, directed searches via perl regular expressions: TGTA[ATC][ATC][ATC][ATC]TA
log2 RNA decay rate FC (deltaPUF5/WT)	Fold change (log2) of mRNA decay rate (deltaPUF5 strain / wild-type strain); data mined from Sun et al. 2013
RNAseq mean FPKM	Mean FPKM value from RNAseq data of BY4742 yeast strain, mined from Lapointe et al. 2015
Estimated RNA molecules	Number of estimated mRNA molecules per cell, based off RNAseq (FPKM) and an estimated 36,000 total mRNAs per cell

## Sheet: Puf5p Target Classes
Puf5p target	Name	Description	Class	Mean TRPM U1 (log2)	Mean TRPM U2 (log2)	Mean TRPM U3 (log2)	Mean TRPM U4 (log2)	Mean TRPM U5 (log2)	Mean TRPM U6 (log2)	Mean TRPM U7 (log2)	Mean TRPM U8 (log2)	Puf3p Target Class	Puf4p Target Class	Puf5p;KOpuf4 Target Class	9BE conservation Score	10BE conservation score	# of 8BEs via directed search	# of 9BEs via directed search	# of 10BEs via directed search	log2 RNA decay rate FC (deltaPUF5/WT)	RNAseq mean FPKM	Estimated RNA molecules
YGL103W	RPL28	Ribosomal 60S subunit protein L28; homologous to mammalian ribosomal protein L27A and bacterial L15; may have peptidyl transferase activity; can mutate to cycloheximide resistance	I	14.4478	13.5664	12.7509	11.8371	10.9763	9.84392	8.29829	6.15785	III	II	I	8	7	0	0	0		2217.26	98.3457
YDR471W	RPL27B	Ribosomal 60S subunit protein L27B; homologous to mammalian ribosomal protein L27, no bacterial homolog; RPL27B has a paralog, RPL27A, that arose from the whole genome duplication	I	10.0497	9.17517	8.33896	7.39746	6.22882	4.98185	3.33628	1.07039	III	II	I	7	6	0	0	1		738.653	32.7627
YDR201W	SPC19	Essential subunit of the Dam1 complex (aka DASH complex); complex couples kinetochores to the force produced by MT depolymerization thereby aiding in chromosome segregation; also localized to nuclear side of spindle pole body	I	9.60028	9.16138	8.61949	8.06232	7.37764	6.21723	4.97269	3.72247	IV	III	I	8	5	1	1	0	-0.289	28.5783	1.26758
YPR052C	NHP6A	High-mobility group (HMG) protein; binds to and remodels nucleosomes; involved in recruiting FACT and other chromatin remodelling complexes to chromosomes; functionally redundant with Nhp6Bp; required for transcriptional initiation fidelity of some tRNA genes; homologous to mammalian HMGB1 and HMGB2; NHP6A has a paralog, NHP6B, that arose from the whole genome duplication; protein abundance incre…	I	8.30561	7.99662	7.57289	7.08428	6.47573	5.62644	4.27053	2.90689			I	3	6	0	0	1	-1.013	154.414	6.84896
YPR053C		Dubious open reading frame; unlikely to encode a functional protein, based on available experimental and comparative sequence data; partially overlaps verified gene NHP6A/YPR052C	I	9.04439	8.70494	8.29829	7.74551	7.10643	6.14364	4.70598	3.1375		IV	I	#N/A	#N/A	0	0	0		5.71642	0.25355
YGR034W	RPL26B	Ribosomal 60S subunit protein L26B; binds to 5.8S rRNA; non-essential even when paralog is also deleted; deletion has minimal affections on ribosome biosynthesis; homologous to mammalian ribosomal protein L26 and bacterial L24; RPL26B has a paralog, RPL26A, that arose from the whole genome duplication	I	9.0232	8.38543	7.78986	7.10119	6.35226	5.35755	3.99096	2.32193			I	7	5	1	0	0		1129.31	50.0901
YAL003W	EFB1	Translation elongation factor 1 beta; stimulates nucleotide exchange to regenerate EF-1 alpha-GTP for the next elongation cycle; part of the EF-1 complex, which facilitates binding of aminoacyl-tRNA to the ribosomal A site	I	12.1099	11.3498	10.7625	10.0816	9.14083	7.87713	6.2724	4.04439			I	5	2	0	0	0		1732.6	76.8488
YGR234W	YHB1	Nitric oxide oxidoreductase; flavohemoglobin involved in nitric oxide detoxification; plays a role in the oxidative and nitrosative stress responses; protein increases in abundance and relocalizes from nucleus to cytoplasmic foci upon DNA replication stress	I	9.5795	8.83352	8.07146	7.14057	6.34696	5.24793	2.848	-0.514573		II	I	9	9	1	0	1		458.786	20.3493
YBR034C	HMT1	Nuclear SAM-dependent mono- and asymmetric methyltransferase; modifies hnRNPs, including Npl3p and Hrp1p, affecting their activity and nuclear export; methylates U1 snRNP protein Snp1p, ribosomal protein Rps2p, and histones H3 and H4; interacts genetically with genes encoding components of Rpd3(L) and this interaction is important for Rpd3 recruitment to the subtelomeric region.	I	10.4177	9.94193	9.46148	8.8458	8.21965	6.99095	5.24413	3.52356	III	I	I	10	9	0	1	0	0.078	287.154	12.7366
YDL083C	RPS16B	Protein component of the small (40S) ribosomal subunit; homologous to mammalian ribosomal protein S16 and bacterial S9; RPS16B has a paralog, RPS16A, that arose from the whole genome duplication	I	10.4876	9.41553	8.47533	7.30195	6.22689	5.0917	3.70044	0.765535			I	6	2	0	0	0		1260.16	55.894
YER030W	CHZ1	Histone chaperone for Htz1p/H2A-H2B dimer; required for the stabilization of the Chz1p-Htz1-H2B complex; has overlapping function with Nap1p; null mutant displays weak sensitivity to MMS and benomyl; contains a highly conserved CHZ motif; protein abundance increases in response to DNA replication stress	I	9.60196	8.98812	8.45204	7.8157	6.88387	6.00225	4.12928	2	IV	IV	I	2	9	1	0	1	-0.423	116.965	5.18795
YDR016C	DAD1	Essential subunit of the Dam1 complex (aka DASH complex); complex couples kinetochores to the force produced by MT depolymerization thereby aiding in chromosome segregation; is transferred to the kinetochore prior to mitosis	I	9.63481	9.33673	8.88111	8.38716	7.63372	6.8009	5.4822	3.49825		IV	I	6	6	0	0	1	-0.497	46.6467	2.069
YML022W	APT1	Adenine phosphoribosyltransferase; catalyzes the formation of AMP from adenine and 5-phosphoribosylpyrophosphate; involved in the salvage pathway of purine nucleotide biosynthesis; APT1 has a paralog, APT2, that arose from the whole genome duplication	I	10.0852	9.44543	8.90719	8.21626	7.44045	6.22689	4.78136	2.63227		I	I	8	9	0	1	0		303.576	13.465
YBL026W	LSM2	Lsm (Like Sm) protein; part of heteroheptameric complexes (Lsm2p-7p and either Lsm1p or 8p): cytoplasmic Lsm1p complex involved in mRNA decay; nuclear Lsm8p complex part of U6 snRNP and possibly involved in processing tRNA, snoRNA, and rRNA; relocalizes from nucleus to cytoplasmic foci upon DNA replication stress	I	9.46189	8.7445	8.28355	7.60733	6.73064	5.65821	4.37851	2.76553			I	4	3	1	0	0		135.551	6.01232
YOL012C	HTZ1	Histone variant H2AZ; exchanged for histone H2A in nucleosomes by the SWR1 complex; involved in transcriptional regulation through prevention of the spread of silent heterochromatin; Htz1p-containing nucleosomes facilitate RNA Pol II passage by affecting correct assembly and modification status of RNA Pol II elongation complexes and by favoring efficient nucleosome remodeling	I	9.09329	8.64638	8.16842	7.51649	6.95884	6.12928	4.64961	2		III	I	12	8	0	1	1	-0.091	134.271	5.95553
YBR010W	HHT1	Histone H3; core histone protein required for chromatin assembly, part of heterochromatin-mediated telomeric and HM silencing; one of two identical histone H3 proteins (see HHT2); regulated by acetylation, methylation, and phosphorylation; H3K14 acetylation plays an important role in the unfolding of strongly positioned nucleosomes during repair of UV damage	I	9.89391	9.68703	9.45861	9.10407	8.62863	7.8716	6.63807	5.0917		I	I	16	10	0	1	0		1023.51	45.3975
YPL187W	MF(ALPHA)1	Mating pheromone alpha-factor, made by alpha cells; interacts with mating type a cells to induce cell cycle arrest and other responses leading to mating; also encoded by MF(ALPHA)2, although MF(ALPHA)1 produces most alpha-factor; MF(ALPHA)1 has a paralog, MF(ALPHA)2, that arose from the whole genome duplication	I	10.9513	10.2862	9.60973	8.85829	7.93428	6.15583	4.22497	2.80735	III	II	I	2	4	0	0	1		1924.21	85.3475
YNL110C	NOP15	Constituent of 66S pre-ribosomal particles; involved in 60S ribosomal subunit biogenesis; localizes to both nucleolus and cytoplasm	I	8.19673	7.35931	6.59096	5.90689	5.04439	4.12928	1.58496	-1.32193		I	I	16	7	0	0	0	0.112	168.558	7.47633
YDR225W	HTA1	Histone H2A; core histone protein required for chromatin assembly and chromosome function; one of two nearly identical subtypes (see also HTA2); DNA damage-dependent phosphorylation by Mec1p facilitates DNA repair; acetylated by Nat4p; N-terminally propionylated in vivo	I	7.33896	6.92244	6.5157	5.99774	5.20555	4.32193	2.8679	-0.321928			I	13	9	1	0	1		961.285	42.6375
YKL166C	TPK3	cAMP-dependent protein kinase catalytic subunit; promotes vegetative growth in response to nutrients via the Ras-cAMP signaling pathway; partially redundant with Tpk1p and Tpk2p; localizes to P-bodies during stationary phase; TPK3 has a paralog, TPK1, that arose from the whole genome duplication	I	7.90629	7.41954	6.848	6.4363	5.94954	4.7761	3.57289	0.137504			I	6	6	1	0	0	-0.313	30.8795	1.36965
YOR224C	RPB8	RNA polymerase subunit ABC14.5; common to RNA polymerases I, II, and III	I	7.45861	6.95536	6.58646	5.8802	5.1416	4.26303	2.926	0.485427	IV	II	I	15	5	0	1	0		401.885	17.8255
YNL113W	RPC19	RNA polymerase subunit AC19; common to RNA polymerases I and III	I	8.08002	7.36457	6.65535	6.09803	5.40939	4.32912	2.8679	0.678072		I	I	11	6	0	1	0	-0.302	258.89	11.483
YOR159C	SME1	Core Sm protein Sm E; part of heteroheptameric complex (with Smb1p, Smd1p, Smd2p, Smd3p, Smx3p, and Smx2p) that is part of the spliceosomal U1, U2, U4, and U5 snRNPs; homolog of human Sm E	I	6.41278	5.93546	5.32912	4.74416	4.17792	2.82782	1.58496	0.584963			I	4	7	0	0	1	-0.686	63.4701	2.8152
YFL045C	SEC53	Phosphomannomutase; involved in synthesis of GDP-mannose and dolichol-phosphate-mannose; required for folding and glycosylation of secretory proteins in the ER lumen	I	7.75422	6.84925	6.23841	5.20163	4.09592	3.15381	1.48543	-0.321928	IV	III	I	8	10	0	0	1		788.453	34.9716
YER058W	PET117	Protein required for assembly of cytochrome c oxidase	I	7.16491	6.8392	6.63372	6.12516	5.73064	5.14975	4.06178	1.37851	II		I	5	9	2	0	0	-0.8	11.4322	0.507074
YDL055C	PSA1	GDP-mannose pyrophosphorylase (mannose-1-phosphate guanyltransferase); synthesizes GDP-mannose from GTP and mannose-1-phosphate in cell wall biosynthesis; required for normal cell wall structure	I	6.98641	6.34518	5.43962	4.72792	3.44626	2.03562	0.847997	-1			II	10	4	0	0	0		2287.29	101.452
YBR162C	TOS1	Covalently-bound cell wall protein of unknown function; identified as a cell cycle regulated SBF target gene; deletion mutants are highly resistant to treatment with beta-1,3-glucanase; has sequence similarity to YJL171C	I	6.91886	6.59395	6.04221	5.26303	4.18587	3.57289	2.48543	0.925999			I	5	7	0	0	0		487.685	21.6311
YKL043W	PHD1	Transcriptional activator that enhances pseudohyphal growth; physically interacts with the Tup1-Cyc8 complex and recruits Tup1p to its targets; regulates expression of FLO11, an adhesin required for pseudohyphal filament formation; similar to StuA, an A. nidulans developmental regulator; potential Cdc28p substrate; PHD1 has a paralog, SOK2, that arose from the whole genome duplication	I	5.6893	5.19771	4.67807	4.3505	3.27799	2.65535	1.58496	0.678072			I	5	14	0	0	1	-0.367	28.1614	1.24909
YML123C	PHO84	High-affinity inorganic phosphate (Pi) transporter; also low-affinity manganese transporter; regulated by Pho4p and Spt7p; mutation confers resistance to arsenate; exit from the ER during maturation requires Pho86p; cells overexpressing Pho84p accumulate heavy metals but do not develop symptoms of metal toxicity	I	6.49985	5.84046	5.37504	4.76553	3.70044	1.848	1.43296	-1.32193		I	II	8	4	0	1	0		984.422	43.6637
YDR224C	HTB1	Histone H2B; core histone protein required for chromatin assembly and chromosome function; nearly identical to HTB2; Rad6p-Bre1p-Lge1p mediated ubiquitination regulates reassembly after DNA replication, transcriptional activation, meiotic DSB formation and H3 methylation	I	6.15785	5.64674	5.29278	4.7115	4.10434	3.24793	1.88752	-0.152003		I	I	14	8	0	1	0		1196.48	53.0695
YPL081W	RPS9A	Protein component of the small (40S) ribosomal subunit; homologous to mammalian ribosomal protein S9 and bacterial S4; RPS9A has a paralog, RPS9B, that arose from the whole genome duplication	I	7.8009	7.18289	6.73335	6.24603	5.7996	4.8125	3.59694	-1		I	II	7	3	0	1	0	0.277	168.582	7.47741
YKR056W	TRM2	tRNA methyltransferase; 5-methylates the uridine residue at position 54 of tRNAs and may also have a role in tRNA stabilization or maturation; endo-exonuclease with a role in DNA repair	I	6.99774	6.18785	5.51412	4.926	3.63227	2.45943	1.26303	-2.32193	IV	III	II	6	7	0	0	1	-0.247	76.813	3.40702
YMR123W	PKR1	V-ATPase assembly factor; functions with other V-ATPase assembly factors in the ER to efficiently assemble the V-ATPase membrane sector (V0); protein abundance increases in response to DNA replication stress	I	8.46107	7.72656	6.94603	6.0917	5.10434	4.35755	2.65535	1.20163		IV	I	3	3	0	0	0	-0.109	164.181	7.28217
YLR303W	MET17	O-acetyl homoserine-O-acetyl serine sulfhydrylase; required for Methionine and cysteine biosynthesis	I	7.86233	7.14771	6.39232	5.61765	4.19377	2.48543	-2.32193			IV	II	6	10	0	0	1		241.197	10.6982
YMR143W	RPS16A	Protein component of the small (40S) ribosomal subunit; homologous to mammalian ribosomal protein S16 and bacterial S9; RPS16A has a paralog, RPS16B, that arose from the whole genome duplication	I	8.0207	7.15279	5.9542	5.26679	4.49825	2.80735	1.72247	1		II	I	6	3	0	0	0		1028.17	45.6043
YBL023C	MCM2	Protein involved in DNA replication; component of the Mcm2-7 hexameric helicase complex that binds chromatin as a part of the pre-replicative complex; relative distribution to the nucleus increases upon DNA replication stress	I	6.18982	5.29278	4.89239	4.01792	3.23266	2.51096	2	0.137504		IV	III	6	12	0	0	1	-0.323	37.6046	1.66794
YDL046W	NPC2	Sterol transport protein and functional homolog of human NPC2/He1; human NPC2 is a cholesterol-binding protein whose deficiency causes Niemann-Pick type C2 disease involving retention of cholesterol in lysosomes; yeast NPC2 can complement mutations in human NPC2	I	7.60437	6.91049	6.06178	4.80219	3.83794	2.3505	-0.736966				II	1	5	0	0	0	-0.381	139.135	6.17129
YPL127C	HHO1	Histone H1, linker histone with roles in meiosis and sporulation; decreasing levels early in sporulation may promote meiosis, and increasing levels during sporulation facilitate compaction of spore chromatin; binds to promoters and within genes in mature spores; may be recruited by Ume6p to promoter regions, contributing to transcriptional repression outside of meiosis; suppresses DNA repair invo…	I	7.17792	6.80736	6.39232	5.86542	5.08321	4.01792	1.72247				I	5	4	0	0	1	-0.249	112.598	4.99423
YDR524C-B		Putative protein of unknown function; YDR524C-B has a paralog, YCL048W-A, that arose from the whole genome duplication	I	7.65535	6.89482	6.27053	5.72792	4.87774	3.44626	1.926	-1			I	0	0	1	0	0		4059.45	180.056
YPL220W	RPL1A	Ribosomal 60S subunit protein L1A; N-terminally acetylated; homologous to mammalian ribosomal protein L10A and bacterial L1; RPL1A has a paralog, RPL1B, that arose from the whole genome duplication; rpl1a rpl1b double null mutation is lethal	I	8.7364	7.85736	7.01123	6.20555	5.30378	4.32193	3.56072		III	II	I	8	6	1	0	0		194.125	8.61034
YOR254C	SEC63	Essential subunit of Sec63 complex; with Sec61 complex, Kar2p/BiP and Lhs1p forms a channel competent for SRP-dependent and post-translational SRP-independent protein targeting and import into the ER; other members are Sec62p, Sec66p, and Sec72p	I	9.95172	8.64997	5.0045	2.82782	2.56072	1.96347	0.765535	0.485427				10	3	0	0	0	0.234	164.546	7.29837
YLR058C	SHM2	Cytosolic serine hydroxymethyltransferase; converts serine to glycine plus 5,10 methylenetetrahydrofolate; major isoform involved in generating precursors for purine, pyrimidine, amino acid, and lipid biosynthesis	I	8.00619	7.45615	6.64961	5.87283	5.07895	4.37156	2.72247	-1.32193		IV	I	6	9	1	0	1		338.353	15.0075
YCR031C	RPS14A	Protein component of the small (40S) ribosomal subunit; required for ribosome assembly and 20S pre-rRNA processing; mutations confer cryptopleurine resistance; homologous to mammalian ribosomal protein S14 and bacterial S11; RPS14A has a paralog, RPS14B, that arose from the whole genome duplication	I	7.08002	5.88509	5.10014	4.35755	2.63227	1.72247	1.26303	-0.152003	II	II	I	5	9	1	0	2		1879.06	83.3452
YPL038W	MET31	Zinc-finger DNA-binding transcription factor; targets strong transcriptional activator Met4p to promoters of sulfur metabolic genes; involved in transcriptional regulation of the methionine biosynthetic genes; feedforward loop controlling expression of MET32 and the lack of such a loop for MET31 may account for the differential actions of Met31p and Met32p; MET31 has a paralog, MET32, that arose …	I	6.63952	5.98869	5.63227	5.15381	4.45286	3.05311	1.43296	-0.736966			II	8	7	0	0	0	0.114	37.6895	1.67171
YOR182C	RPS3B	Protein component of the small (40S) ribosomal subunit; homologous to mammalian ribosomal protein S30, no bacterial homolog; RPS30B has a paralog, RPS30A, that arose from the whole genome duplication; protein abundance increases in response to DNA replication stress	I	7.78267	6.80736	5.83036	4.79701	3.60881	2.43296	0.485427	-0.514573				3	5	1	0	0		1191.25	52.8374
YKR094C	RPL4B	Ubiquitin-ribosomal 60S subunit protein L40B fusion protein; cleaved to yield ubiquitin and ribosomal protein L40B; ubiquitin may facilitate assembly of the ribosomal protein into ribosomes; homologous to mammalian ribosomal protein L40, no bacterial homolog; RPL40B has a paralog, RPL40A, that arose from the whole genome duplication	I	8.44708	7.62571	6.88509	6.05528	5.30012	4.32912	2.72247	0.678072			I	4	2	0	0	0		978.05	43.3811
YHL033C	RPL8A	Ribosomal 60S subunit protein L8A; required for processing of 27SA3 pre-rRNA to 27SB pre-rRNA during assembly of large ribosomal subunit; depletion leads to a turnover of pre-rRNA; L8 binds to Domain I of 25S and 5.8 S rRNAs; mutation results in decreased amounts of free 60S subunits; homologous to mammalian ribosomal protein L7A, no bacterial homolog; RPL8A has a paralog, RPL8B, that arose from …	I	8.29416	7.61471	6.84925	6.16189	5.27799	4.3505	2.82782	-0.514573	III		I	8	6	1	0	0		1171.3	51.9524
YKL038W	RGT1	Glucose-responsive transcription factor; regulates expression of several glucose transporter (HXT) genes in response to glucose; binds to promoters and acts both as a transcriptional activator and repressor; recruits Tup1p/Cyc8p to target gene promoters; RGT1 has a paralog, EDS1, that arose from the whole genome duplication	I	5.88996	5.41278	5.07895	4.39917	4.34341	4.12928	3.7761	-0.736966			II	2	9	0	0	1	-0.299	22.1839	0.983962
YPR182W	SMX3	Core Sm protein Sm F; part of heteroheptameric complex (with Smb1p, Smd1p, Smd2p, Smd3p, Sme1p, and Smx2p) that is part of the spliceosomal U1, U2, U4, and U5 snRNPs; homolog of human Sm F	I	7.47816	6.67807	5.92125	4.97269	3.76553	3.26303	1.67807				I	6	6	0	0	0	-0.741	78.362	3.47572
YGL097W	SRM1	Nucleotide exchange factor for Gsp1p; localizes to the nucleus, required for nucleocytoplasmic trafficking of macromolecules; suppressor of the pheromone response pathway; potentially phosphorylated by Cdc28p	I	6.8679	6.34696	5.67242	4.67807	3.98185	2.16993	1.37851			I	I	8	7	0	1	0	-0.062	106.002	4.70169
YGL153W	PEX14	Central component of the peroxisomal importomer complex; peroxisomal protein import machinery docking complex component; interacts with both PTS1 (Pex5p) and PTS2 (Pex7p) peroxisomal matrix protein signal recognition factors and membrane receptor Pex13p	I	7.02015	6.38197	5.63517	4.89239	3.82782	2.76553	1.43296	-1.73697		IV	II	5	10	0	0	0	-0.237	21.8903	0.970935
YGR260W	TNA1	High affinity nicotinic acid plasma membrane permease; responsible for uptake of low levels of nicotinic acid; expression of the gene increases in the absence of extracellular nicotinic acid or para-aminobenzoate (PABA)	I	6.83794	6.18982	5.60288	5.09592	4.56682	3.7115	2.82782	2.40599			II	4	4	0	0	0	0.23	116.093	5.14928
YEL036C	ANP1	Subunit of the alpha-1,6 mannosyltransferase complex; type II membrane protein; has a role in retention of glycosyltransferases in the Golgi; involved in osmotic sensitivity and resistance to aminonitrophenyl propanediol	I	7.66249	7.04658	6.53761	5.78136	4.41954	2.74416	1.96347	0.263034			II	8	11	1	0	1	0.118	80.872	3.58705
YOR101W	RAS1	GTPase involved in G-protein signaling in adenylate cyclase activation; plays a role in cell proliferation; localized to the plasma membrane; homolog of mammalian RAS proto-oncogenes; relative distribution to the nucleus increases upon DNA replication stress; RAS1 has a paralog, RAS2, that arose from the whole genome duplication	I	6.97384	6.15785	5.71973	5	3.97269	1.88752	0.847997	0.485427			II	5	10	1	0	0	0.202	129.357	5.73759
YNL030W	HHF2	Histone H4; core histone protein required for chromatin assembly and chromosome function; one of two identical histone proteins (see also HHF1); contributes to telomeric silencing; N-terminal domain involved in maintaining genomic integrity	I	8.00506	7.57137	7.14873	6.52826	5.6893	4.69488	2.98185	0.678072		II	I	14	9	0	1	0		1294.96	57.4374
YDL070W	BDF2	Protein involved in transcription initiation; acts at TATA-containing promoters; associates with the basal transcription factor TFIID; contains two bromodomains; corresponds to the C-terminal region of mammalian TAF1; redundant with Bdf1p; protein abundance increases in response to DNA replication stress; BDF2 has a paralog, BDF1, that arose from the whole genome duplication	I	7.07146	6.33271	5.7866	5.10852	4.64386	3.67807	2.848	1.43296	IV	III	I	6	8	1	0	1	-0.284	89.1663	3.95494
YLR406C	RPL31B	Ribosomal 60S subunit protein L31B; associates with karyopherin Sxm1p; loss of both Rpl31p and Rpl39p confers lethality; homologous to mammalian ribosomal protein L31, no bacterial homolog; RPL31B has a paralog, RPL31A, that arose from the whole genome duplication	I	6.86047	5.88996	5.24793	4.43296	3.26303	2.60881	1.26303		II	III	II	14	4	0	0	0		505.462	22.4196
YGR155W	CYS4	Cystathionine beta-synthase; catalyzes synthesis of cystathionine from serine and homocysteine, the first committed step in cysteine biosynthesis; responsible for hydrogen sulfide generation; advances passage through START by promoting cell growth which requires catalytic activity, and reducing critical cell size independent of catalytic activity; mutations in human ortholog CBS cause homocystinu…	I	7.49905	6.44956	5.5267	4.62059	3.3505	1.926	0.485427	-1.32193			I	5	4	0	0	0		703.183	31.1894
YDR129C	SAC6	Fimbrin, actin-bundling protein; cooperates with calponin/transgelin Scp1p in organization and maintenance of actin cytoskeleton; relocalizes from plasma membrane to cytoplasm upon DNA replication stress; human homologs PLS3 and LCP1 implicated in spinocerebellar ataxia type 2 (SCA2) can each complement yeast null mutant	I	7.46352	6.65678	5.83542	5.06609	4.06178	3.15381	1.58496	-1.73697		IV	II	8	12	0	0	1	-0.309	199.533	8.85024
YDR361C	BCP1	Essential protein involved in nuclear export of Mss4p; Mss4p is a lipid kinase that generates phosphatidylinositol 4,5-biphosphate and plays a role in actin cytoskeleton organization and vesicular transport	I	7.1467	6.48059	6.06393	5.10434	4.32912	3.81762	2.70044	0.378512		I	II	8	6	0	1	0	0.096	109.496	4.85667
YML093W	UTP14	Subunit of U3-containing Small Subunit (SSU) processome complex; involved in production of 18S rRNA and assembly of small ribosomal subunit	I	6.1127	5.58195	5.10434	4.30743	3.3505	2.56072	2.20163	0.378512		I	I	11	4	0	0	0	-0.263	85.7514	3.80348
YOR095C	RKI1	Ribose-5-phosphate ketol-isomerase; catalyzes the interconversion of ribose 5-phosphate and ribulose 5-phosphate in the pentose phosphate pathway; participates in pyridoxine biosynthesis	I	6.61765	6.06609	5.48864	4.7761	4.03562	3.03562	1.07039	-0.736966			II	3	9	0	1	1		161.686	7.17151
YBR283C	SSH1	Subunit of the Ssh1 translocon complex; Sec61p homolog involved in co-translational pathway of protein translocation; not essential	I	7.06931	6.20359	5.76288	5.32553	4.40599	3.27799	1.43296	-2.32193			II	2	10	1	0	1		297.749	13.2065
YML075C	HMG1	HMG-CoA reductase; catalyzes the conversion of HMG-CoA to mevalonate, which is a rate-limiting step in sterol biosynthesis; one of two isozymes; localizes to the nuclear envelope; overproduction induces the formation of karmellae; forms foci at the nuclear periphery upon DNA replication stress; HMG1 has a paralog, HMG2, that arose from the whole genome duplication	I	7.03452	6.03122	5.47573	5.03122	4.27799	3.41954	2.90689	-1			II	7	8	0	0	0	-0.672	60.6974	2.69221
YBR052C	RFS1	Protein of unknown function; member of a flavodoxin-like fold protein family that includes Pst2p and Ycp4p; green fluorescent protein (GFP)-fusion protein localizes to the cytoplasm in a punctate pattern; RFS1 has a paralog, PST2, that arose from the whole genome duplication	I	7.16792	6.28725	5.60288	5.2211	4.70598	2.37851	0.678072	-2.32193			II	5	2	0	0	0	0.327	98.0204	4.34766
YLR325C	RPL38	Ribosomal 60S subunit protein L38; homologous to mammalian ribosomal protein L38, no bacterial homolog	I	8.23649	7.26959	6.54998	5.63517	4.71699	3.40599	1.20163	-1	III	II	I	6	7	0	0	0		3324.77	147.469
YLR344W	RPL26A	Ribosomal 60S subunit protein L26A; binds to 5.8S rRNA; non-essential even when paralog is also deleted; deletion has minimal affections on ribosome biosynthesis; homologous to mammalian ribosomal protein L26 and bacterial L24; RPL26A has a paralog, RPL26B, that arose from the whole genome duplication	I	8.37547	7.36632	6.32553	5.32912	4.27799	2.80735	0.765535	-2.32193	II	II	I	7	4	0	0	0		558.553	24.7744
YNL066W	SUN4	Cell wall protein related to glucanases; possibly involved in cell wall septation; member of the SUN family; SUN4 has a paralog, SIM1, that arose from the whole genome duplication	I	7.55305	6.99322	6.26679	5.51412	4.7761	3.9542	2.45943				I	10	14	0	0	2		323.994	14.3706
YDL229W	SSB1	Cytoplasmic ATPase that is a ribosome-associated molecular chaperone; functions with J-protein partner Zuo1p; may be involved in folding of newly-made polypeptide chains; member of the HSP70 family; interacts with phosphatase subunit Reg1p; SSB1 has a paralog, SSB2, that arose from the whole genome duplication	I	6.78267	5.83794	5.0045	4.06178	3.10434	2.23266	1.37851	-0.152003			II	10	13	1	0	1		1769.19	78.4718
YER072W	VTC1	Subunit of the vacuolar transporter chaperone (VTC) complex; VTC complex is involved in membrane trafficking, vacuolar polyphosphate accumulation, microautophagy and non-autophagic vacuolar fusion; also has mRNA binding activity; protein abundance increases in response to DNA replication stress	I	8.95623	8.17941	7.45943	6.49345	5.74147	4.49185	3.6893	-1			II	8	3	0	0	0		664.622	29.4791
YNL031C	HHT2	Histone H3; core histone protein required for chromatin assembly, part of heterochromatin-mediated telomeric and HM silencing; one of two identical histone H3 proteins (see HHT1); regulated by acetylation, methylation, and phosphorylation; H3K14 acetylation plays an important role in the unfolding of strongly positioned nucleosomes during repair of UV damage	I	7.11478	6.44626	5.49825	4.87774	3.58496	2.67807			IV	I	II	14	10	0	2	0		1010.32	44.8124
YPL218W	SAR1	GTPase, GTP-binding protein of the ARF family; component of COPII coat of vesicles; required for transport vesicle formation during ER to Golgi protein transport; lowers membrane rigidity helping in vesicle formation	I	9.00141	8.20701	7.54535	6.70321	5.88264	4.80736	2.94486	0.485427			I	6	7	1	0	1		343.275	15.2259
YMR307W	GAS1	Beta-1,3-glucanosyltransferase; required for cell wall assembly and also has a role in transcriptional silencing; localizes to cell surface via a glycosylphosphatidylinositol (GPI) anchor; also found at nuclear periphery; genetic interactions with histone H3 lysine acetyltransferases GCN5 and SAS3 indicate previously unsuspected functions for Gas1 in DNA damage response and cell cycle regulation	I	8.61985	7.84612	7.04876	6.01792	5.01792	3.73335	2.56072	-1			I	10	12	0	0	0		1424.69	63.1915
YDR075W	PPH3	Catalytic subunit of protein phosphatase PP4 complex; Pph3p and Psy2p form active complex, Psy4p may provide substrate specificity; regulates recovery from the DNA damage checkpoint, the gene conversion- and single-strand annealing-mediated pathways of meiotic double-strand break repair and efficient Non-Homologous End-Joining (NHEJ) pathway; involved in activation of Gln3p to alleviate nitrogen …	I	7.1809	6.77742	6.29094	5.62936	4.70044	3.83794	2.07039	-0.152003			I	4	9	0	0	1	-0.65	36.9727	1.63991
YGR274C	TAF1	TFIID subunit, involved in RNA pol II transcription initiation; possesses in vitro histone acetyltransferase activity but its role in vivo appears to be minor; involved in promoter binding and G1/S progression; relocalizes to the cytosol in response to hypoxia	I	7.6014	7.18884	6.45943	6.04221	4.70598	3.63227	3.05311	1.07039		II	II	4	6	0	1	1	-0.479	26.1115	1.15817
YBL027W	RPL19B	Ribosomal 60S subunit protein L19B; rpl19a and rpl19b single null mutations result in slow growth, while the double null mutation is lethal; homologous to mammalian ribosomal protein L19, no bacterial homolog; RPL19B has a paralog, RPL19A, that arose from the whole genome duplication	I	9.33718	8.17293	7.24222	5.97728	4.98185	3.16993	1.37851	-2.32193	IV	II	I	7	2	0	0	0		2218.02	98.3794
YIL069C	RPS24B	Protein component of the small (40S) ribosomal subunit; homologous to mammalian ribosomal protein S24, no bacterial homolog; RPS24B has a paralog, RPS24A, that arose from the whole genome duplication	I	8.04275	7.34341	6.49345	5.5267	4.41278	3.44626	1.1375	0.263034	III	I	II	7	6	0	0	0		495.88	21.9946
YDR381W	YRA1	Nuclear polyadenylated RNA-binding protein; required for export of poly(A)+ mRNA from the nucleus; proposed to couple mRNA export with 3' end processing via its interactions with Mex67p and Pcf11p; interacts with DBP2; inhibits the helicase activity of Dbp2; functionally redundant with Yra2p, another REF family member	I	8.30697	7.6453	7.03122	6.50144	5.87529	4.926	3.41954	1.848			I	3	4	0	0	2		165.306	7.33207
YLR293C	GSP1	Ran GTPase; GTP binding protein (mammalian Ranp homolog) involved in the maintenance of nuclear organization, RNA processing and transport; regulated by Srm1p, Rna1p, Yrb1p, Yrb2p, Yrp4p, Yrb30p, Cse1p and Kap95p; GSP1 has a paralog, GSP2, that arose from the whole genome duplication	I	8.02403	7.0542	6.03122	4.99549	3.3505	1.20163				II	I	8	11	0	0	1		1642.32	72.8445
YKL156W	RPS27A	Protein component of the small (40S) ribosomal subunit; homologous to mammalian ribosomal protein S27, no bacterial homolog; RPS27A has a paralog, RPS27B, that arose from the whole genome duplication; protein abundance increases in response to DNA replication stress	I	6.45286	6.03122	5.52982	4.91648	4.18587	3.23266	1.76554	-0.736966		III	II	8	8	0	1	0		500.012	22.1779
YNL301C	RPL18B	Ribosomal 60S subunit protein L18B; homologous to mammalian ribosomal protein L18, no bacterial homolog; RPL18B has a paralog, RPL18A, that arose from the whole genome duplication	I	9.27333	8.54458	7.95826	6.91289	6.05528	4.6837	2.16993	-3.32193	III	I	I	6	5	0	2	0		163.203	7.23879
YCL025C	AGP1	Low-affinity amino acid permease with broad substrate range; involved in uptake of asparagine, glutamine, and other amino acids; expression regulated by SPS plasma membrane amino acid sensor system (Ssy1p-Ptr3p-Ssy5p); AGP1 has a paralog, GNP1, that arose from the whole genome duplication	II	5.37156	4.76022	3.57289	2.63227	2.37851	0.847997					III	6	6	0	0	0	0.006	11.2954	0.501004
YMR241W	YHM2	Citrate and oxoglutarate carrier protein; exports citrate from and imports oxoglutarate into the mitochondrion, causing net export of NADPH reducing equivalents; also associates with mt nucleoids and has a role in replication and segregation of the mt genome	II	5.60585	4.67807	4.36457	3.45943	2.51096	1.96347	0.765535	-0.736966		IV	II	10	2	0	1	0		199.736	8.85922
YHR058C	MED6	Subunit of the RNA polymerase II mediator complex; associates with core polymerase subunits to form the RNA polymerase II holoenzyme; essential for transcriptional regulation; protein abundance increases in response to DNA replication stress	II	5.50462	5.24793	4.49825	4.2555	3.12101	1.32193	-2.32193	-3.32193		III	II	6	2	0	1	0	-0.505	31.3631	1.3911
YIL126W	STH1	ATPase component of the RSC chromatin remodeling complex; required for expression of early meiotic genes; promotes base excision repair in chromatin; essential helicase-related protein homologous to Snf2p	II	5.51096	5.08321	4.40599	4	3.70044	1.37851	-0.321928	-3.32193			II	7	11	0	0	1	-0.344	68.9613	3.05876
YER070W	RNR1	Major isoform of large subunit of ribonucleotide-diphosphate reductase; the RNR complex catalyzes rate-limiting step in dNTP synthesis, regulated by DNA replication and DNA damage checkpoint pathways via localization of small subunits; relative distribution to the nucleus increases upon DNA replication stress; RNR1 has a paralog, RNR3, that arose from the whole genome duplication	II	6.32912	5.51096	4.79701	3.59694	2.74416	1	-0.514573	-3.32193		III	II	15	5	0	1	0	-0.154	285.932	12.6824
YHR127W		Protein of unknown function; localizes to the nucleus; required for asymmetric localization of Kar9p during mitosis	II	5.96809	5.44956	5.15381	3.94486	3.53605	3.40599	-0.736966	-1.73697			III	3	4	2	1	0	0.017	43.4498	1.9272
YPR019W	MCM4	Essential helicase component of heterohexameric MCM2-7 complexes; MCM2-7 complexes bind pre-replication complexes on DNA and melt DNA prior to replication; forms an Mcm4p-6p-7p subcomplex; shows nuclear accumulation in G1; homolog of S. pombe Cdc21p	II	5.32193	4.54226	3.75489	3.03562	1.926	1.43296	0.263034				II	9	9	0	0	1	-0.193	44.3144	1.96555
YDR389W	SAC7	GTPase activating protein (GAP) for Rho1p; regulator of a Tor2p-mediated, Rho1p GTPase switch that controls organization of the actin cytoskeleton; negative regulator of the RHO1-PKC1-MAPK cell integrity (CWI) and membrane fluidity homeostasis signaling pathways; potential Cdc28p substrate; SAC7 has a paralog, BAG7, that arose from the whole genome duplication	II	5.74953	5.36807	4.98641	4.70044	3.63227	2.45943	2.16993	-3.32193			III	8	9	0	0	1	0.006	47.3774	2.10141
YDL002C	NHP1	Non-essential INO80 chromatin remodeling complex subunit; preferentially binds DNA ends, protecting them from exonucleatic cleavage; deletion affects telomere maintenance via recombination; related to mammalian high mobility group proteins	II	6.25172	6.07468	5.36107	4.84298	4.20945	2.1375	-1.73697	-2.32193			II	11	7	0	1	0	-0.146	52.8699	2.34503
YLL036C	PRP19	Splicing factor associated with the spliceosome; contains a U-box, a motif found in a class of ubiquitin ligases, and a WD40 domain; relocalizes to the cytosol in response to hypoxia	II	4.59694	4.49825	3.85798	3.59694	3.30743	1.848	1.67807	-3.32193			III	10	7	0	0	0	-0.099	43.7614	1.94102
YDL064W	UBC9	SUMO-conjugating enzyme involved in the Smt3p conjugation pathway; nuclear protein required for S- and M-phase cyclin degradation and mitotic control; involved in proteolysis mediated by the anaphase-promoting complex cyclosome (APCC)	II	6.91169	6.12928	5.49825	3.98185	2.3505	0.263034				II	II	10	6	0	1	0	-0.414	106.107	4.70635
YGR014W	MSB2	Mucin family member involved in various signaling pathways; functions as osmosensor in the Sho1p-mediated HOG pathway; functions in Cdc42p- and MAP kinase-dependent filamentous growth signaling pathway; processed into secreted and cell-associated forms by aspartyl protease Yps1p; potential Cdc28p substrate	II	7.1334	6.28355	5.27053	4.97728	4.37156	0.584963	0.137504	-1.32193		III	II	7	12	0	0	0	-0.436	81.6052	3.61957
YER012W	PRE1	Beta 4 subunit of the 20S proteasome; localizes to the nucleus throughout the cell cycle	II	5.51728	5.01346	4.45286	3.72247	3.39232	1.96347	-1				II	6	4	0	0	0		262.704	11.6522
YOR116C	RPO31	RNA polymerase III largest subunit C160; part of core enzyme; similar to bacterial beta-prime subunit and to RPA190 and RPO21	II	6.37504	6.08321	5.20555	4.1375	2.23266	0.678072					II	7	7	0	0	0	-0.405	114.623	5.08405
YOR058C	ASE1	Mitotic spindle midzone-localized microtubule bundling protein; microtubule-associated protein (MAP) family member; required for spindle elongation and stabilization; undergoes cell cycle-regulated degradation by anaphase promoting complex; potential Cdc28p substrate; relative distribution to microtubules decreases upon DNA replication stress	II	5.50144	5.17393	4.27053	3.93546	2.88753	1.48543	0.584963	-2.32193			II	5	7	0	0	1	-0.559	23.2876	1.03291
YBR084C-A	RPL19A	Ribosomal 60S subunit protein L19A; rpl19a and rpl19b single null mutations result in slow growth, while the double null mutation is lethal; homologous to mammalian ribosomal protein L19, no bacterial homolog; RPL19A has a paralog, RPL19B, that arose from the whole genome duplication	II	4.16993	3.7115	3.1375	2.37851	1.926	1.20163	0.678072	-3.32193	IV		II	6	3	0	0	0		1318.39	58.4767
YLR300W	EXG1	Major exo-1,3-beta-glucanase of the cell wall; involved in cell wall beta-glucan assembly; exists as three differentially glycosylated isoenzymes; EXG1 has a paralog, SPR1, that arose from the whole genome duplication	II	5.30378	4.66106	4	3.24793	2.63227	1.37851	-0.321928	-2.32193		II	II	3	2	0	1	0		470.637	20.8749
YOL097C	WRS1	Cytoplasmic tryptophanyl-tRNA synthetase; aminoacylates tryptophanyl-tRNA	II	6.04002	5.20945	4.75489	4.1375	3.01792	2.53605	2.20163	-2.32193		III	II	6	3	0	0	0	0.413	239.307	10.6144
YDR412W	RRP17	Component of the pre-60S pre-ribosomal particle; required for cell viability under standard (aerobic) conditions but not under anaerobic conditions; exonuclease required for 5' end processing of pre-60S ribosomal RNA	II	4.49825	3.96347	3.30743	2.45943	2.29278	1.43296	1.20163	-2.32193		IV	III	9	3	0	1	0	-0.056	57.1145	2.5333
YGR187C	HGH1	Nonessential protein of unknown function; predicted to be involved in ribosome biogenesis; green fluorescent protein (GFP)-fusion protein localizes to the cytoplasm; similar to mammalian BRP16 (Brain protein 16); relative distribution to the nucleus increases upon DNA replication stress	II	5.8125	5	4.18587	2.8679	2.60881	1.926				II	III	11	6	1	1	0	-0.545	64.7171	2.87051
YDR502C	SAM2	S-adenosylmethionine synthetase; catalyzes transfer of the adenosyl group of ATP to the sulfur atom of methionine; comparative analysis suggests that a mitochondrially targeted form may result from translation starting at a non-canonical codon upstream of the annotated start codon	II	6.32373	5	4.30012	3.1375	2.37851	1.20163	-0.152003	-3.32193	IV		III	5	5	1	0	0	0.245	188.511	8.36136
YDR433W		Dubious open reading frame; unlikely to encode a functional protein, based on available experimental and comparative sequence data	II	6.67948	6.15178	5.30378	4.24793	3.52356	2.848	1	-2.32193			II	#N/A	#N/A	0	0	0		6.30893	0.27983
YBR252W	DUT1	deoxyuridine triphosphate diphosphatase (dUTPase); catalyzes hydrolysis of dUTP to dUMP and PPi, thereby preventing incorporation of uracil into DNA during replication; critical for the maintenance of genetic stability; also has diphosphatase activity on deoxyinosine triphosphate	II	5.96116	5.12101	3.97269	2.32193	1.63227	0.584963	0.378512	0.137504	IV	I	II	8	6	1	1	0		143.591	6.36892
YCR008W	SAT4	Ser/Thr protein kinase involved in salt tolerance; funtions in regulation of Trk1p-Trk2p potassium transporter; overexpression affects the Fe-S and lipoamide containing proteins in the mitochondrion; required for lipoylation of Lat1p, Kgd2p and Gcv3p; partially redundant with Hal5p; has similarity to Npr1p; localizes to the cytoplasm and mitochondrion	II	4.54226	3.9542	3.37851	2.60881	1.88752	1.32193	-0.736966	-2.32193				6	7	0	0	1	-0.46	78.1685	3.46714
YDL159W	STE7	Signal transducing MAP kinase kinase; involved in pheromone response where it phosphorylates Fus3p; involved in the pseudohyphal/invasive growth pathway where it phosphorylates of Kss1p; phosphorylated by Ste11p; degraded by ubiquitin pathway	II	5.24793	4.67242	4.1375	3.30743	2.70044	1.67807	0.485427	-3.32193			II	2	6	0	0	1	-0.042	18.6516	0.827284
YKR057W	RPS21A	Protein component of the small (40S) ribosomal subunit; homologous to mammalian ribosomal protein S21, no bacterial homolog; RPS21A has a paralog, RPS21B, that arose from the whole genome duplication	II	5.6837	4.94017	4.37156	3.60881	2.53605	1.37851	0.137504	-2.32193		III	III	5	6	0	0	1		670.993	29.7617
YJR054W	KCH1	Potassium transporter that mediates K+ influx; activates high-affinity Ca2+ influx system (HACS) during mating pheromone response; expression up-regulated in response to alpha factor; localized to sites of polarized growth; member of a fungal-specific gene family; potential Cdc28p substrate; KCH1 has a paralog, PRM6, that arose from the whole genome duplication	II	5.54844	4.853	3.63227	2.58496	2.1375	1.80736	0.378512	-1			III	3	7	0	0	1	-0.616	41.388	1.83575
YKL152C	GPM1	Tetrameric phosphoglycerate mutase; mediates the conversion of 3-phosphoglycerate to 2-phosphoglycerate during glycolysis and the reverse reaction during gluconeogenesis	II	4.42626	3.70044	3.15381	2.72247	2.03562	1.48543	1.32193	-3.32193		II	III	2	4	0	0	0		9298.35	412.425
YKR042W	UTH1	Mitochondrial inner membrane protein; role in mitophagy is disputed; implicated in cell wall biogenesis, the oxidative stress response, life span during starvation, and cell death; SUN family member; UTH1 has a paralog, NCA3, that arose from the whole genome duplication	II	5.27426	4.51096	3.9542	3.10434	2.3505	1.07039	-0.514573	-1.73697			III	4	6	0	0	0		723.21	32.0777
YOL158C	ENB1	Endosomal ferric enterobactin transporter; expressed under conditions of iron deprivation; member of the major facilitator superfamily; expression is regulated by Rcs1p and affected by chloroquine treatment	II	6.32373	5.853	5.10852	3.89724	2.32193	1.26303	0.765535				III	3	4	1	0	1	-0.414	52.5961	2.33288
YOR369C	RPS12	Protein component of the small (40S) ribosomal subunit; homologous to mammalian ribosomal protein S12, no bacterial homolog	II	6.40769	5.44956	4.64386	3.7761	2.16993	1.48543	-1.32193	-3.32193				11	5	0	1	0		6117.54	271.342
YLR218C	COA4	Twin Cx(9)C protein involved in cytochrome c oxidase organization; organization includes assembly or stability; localizes to the mitochondrial intermembrane space via the Mia40p-Erv1p system; interacts genetically with CYC1 and with cytochrome c oxidase assembly factors	II	5.30378	4.54226	4.52356	3.94486	3.10434	1.58496	0.925999	-3.32193	I	IV	II	2	1	1	0	0	-0.113	8.3326	0.36959
YCR015C	CTO1	Protein required for cold tolerance; involved in phosphate uptake; YCR015C is not an essential gene	II	5.10852	4.32193	3.9542	3.63227	2.1375	0.847997	-0.736966				IV	4	8	0	0	0	0.179	21.1619	0.93863
YJL148W	RPA34	RNA polymerase I subunit A34.5; essential for nucleolar assembly and for high polymerase loading rate; nucleolar localization depends on Rpa49p	II	5.77347	5.24413	4.73335	3.43296	2.926	2.40599	-0.514573			II	II	13	6	0	1	0		121.009	5.36729
YGR119C	NUP57	FG-nucleoporin component of central core of the nuclear pore complex; contributes directly to nucleocytoplasmic transport and maintenance of the nuclear pore complex (NPC) permeability barrier; found in stable complex with Nic96p and two other FG-nucleoproteins (Nsp1p and Nup49p)	II	6.12516	5.57592	4.9542	3.81762	2.56072	0.925999	-1.73697			III		8	4	0	0	0	0.015	75.4073	3.34467
YOR320C	GNT1	N-acetylglucosaminyltransferase; capable of modification of N-linked glycans in the Golgi apparatus	II	5.67242	5.04876	4.61471	4.04439	3.58496	3.07039	0.925999	-2.32193			II	5	3	0	0	0	0.187	66.3535	2.94309
YOL140W	ARG8	Acetylornithine aminotransferase; catalyzes the fourth step in the biosynthesis of the arginine precursor ornithine	II	5.83036	5.26679	4.75489	3.81762	2.88753	0.925999	-0.736966				III	6	8	0	0	0	-0.111	39.6602	1.75911
YGR041W	BUD9	Protein involved in bud-site selection; mutant has increased aneuploidy tolerance; diploid mutants display a unipolar budding pattern instead of the wild-type bipolar pattern, and bud at the distal pole; BUD9 has a paralog, BUD8, that arose from the whole genome duplication	II	5.4822	5.0045	3.8679	3.41954	3.3505	1.96347	1.88752	-0.736966			III	1	4	0	0	1	-0.152	28.1329	1.24783
YOR272W	YTM1	Constituent of 66S pre-ribosomal particles; forms a complex with Nop7p and Erb1p that is required for maturation of the large ribosomal subunit; has seven C-terminal WD repeats	II	6.14771	5.33271	5.12101	2.70044	0.847997	0.378512				II	III	9	6	0	0	0	0.246	154.368	6.84694
YEL061C	CIN8	Kinesin motor protein; involved in mitotic spindle assembly and chromosome segregation	II	5.04876	4.3505	3.48543	3.01792	2.848	1.80736	0.678072				II	7	9	0	0	1	0.008	28.8969	1.28171
YDR267C	CIA1	Component of cytosolic iron-sulfur protein assembly (CIA) machinery; acts at a late step of Fe-S cluster assembly; forms the CIA targeting complex with Cia2p and Met18p that directs Fe-S cluster incorporation into a subset of proteins involved in methionine biosynthesis, DNA replication and repair, transcription, and telomere maintenance; contains WD40 repeats; ortholog of human Ciao1 protein	II	4.2854	4.2555	3	2.90689	2.8679	2.76553	-1.73697					2	8	1	0	1	0.235	26.9173	1.19391
YBR233W-A	DAD3	Essential subunit of the Dam1 complex (aka DASH complex); complex couples kinetochores to the force produced by MT depolymerization thereby aiding in chromosome segregation; is transferred to the kinetochore prior to mitosis	II	5.50144	5.16189	4.7761	4.66676	3.3505	2.45943	1	-1			I	2	5	0	0	2	-1.423	27.9205	1.2384
YNL087W	TCB2	ER protein involved in ER-plasma membrane tethering; one of 6 proteins (Ist2p, Scs2p, Scs22p, Tcb1p, Tcb2p, Tcb3p) that connect ER to plasma membrane (PM) and regulate PM phosphatidylinositol-4-phosphate (PI4P) levels by controlling access of Sac1p phosphatase to its substrate PI4P in the PM; contains 3 calcium and lipid binding domains; mRNA is targeted to bud; TCB2 has a paralog, TCB1, that aro…	II	6.11686	5.22497	4.52982	3.30743	1.76554	1.43296				III	III	8	6	0	0	1	-0.207	114.997	5.10065
YCR028C-A	RIM1	ssDNA-binding protein essential for mitochondrial genome maintenance; involved in mitochondrial DNA replication	II	6.74147	5.96578	5.16993	3.56072	2.40599	0.765535	-3.32193				III	5	8	1	0	2		187.037	8.29599
YPR132W	RPS23B	Ribosomal protein 28 (rp28) of the small (40S) ribosomal subunit; required for translational accuracy; homologous to mammalian ribosomal protein S23 and bacterial S12; RPS23B has a paralog, RPS23A, that arose from the whole genome duplication; deletion of both RPS23A and RPS23B is lethal	II	6.67807	5.47249	4.83289	4.1127	3.64386	3.01792	1.07039	-3.32193			II	5	5	0	0	0		1366.72	60.6205
YNL151C	RPC31	RNA polymerase III subunit C31	II	4.43296	4.30743	4.04439	3.52356	2.3505	2		-1.32193			III	11	5	0	0	2	0.247	57.9053	2.56837
YDL213C	NOP6	rRNA-binding protein required for 40S ribosomal subunit biogenesis; contains an RNA recognition motif (RRM); hydrophilin essential to overcome the stress of the desiccation-rehydration process; NOP6 may be a fungal-specific gene as no homologs have been yet identified in higher eukaryotes	II	5.6837	4.79701	4.77083	3.99096	0.678072	0.378512	-1	-2.32193	IV	I	II	11	7	0	1	0	0.083	107.817	4.78221
YDL184C	RPL41A	Ribosomal 60S subunit protein L41A; comprises only 25 amino acids; rpl41a rpl41b double null mutant is viable; homologous to mammalian ribosomal protein L41, no bacterial homolog; RPL41A has a paralog, RPL41B, that arose from the whole genome duplication	II	5.54226	4.99095	3.8679	2.72247	1.07039	0.678072	0.378512	-0.152003	III	II	II	1	0	0	0	0	-1.039	2977.47	132.065
YDR297W	SUR2	Sphinganine C4-hydroxylase; catalyses the conversion of sphinganine to phytosphingosine in sphingolipid biosyntheis	II	6.10643	5.21335	4.73335	4.21723	3.1375	2.32193	1.88752	-3.32193			II	6	5	1	0	0	0.194	109.931	4.87595
YDR064W	RPS13	Protein component of the small (40S) ribosomal subunit; homologous to mammalian ribosomal protein S13 and bacterial S15	II	5.4363	4.6893	3.99096	3.3505	2.45943	1.76554	-0.321928	-1.73697		IV	II	3	9	0	0	1		1994.6	88.47
YJR094W-A	RPL43B	Ribosomal 60S subunit protein L43B; homologous to mammalian ribosomal protein L37A, no bacterial homolog; RPL43B has a paralog, RPL43A, that arose from the whole genome duplication; protein abundance increases in response to DNA replication stress	II	6.82528	5.8505	4.83794	3.94486	2.98185	1.88752						4	8	0	0	0		763.835	33.8796
YKR095W	MLP1	Myosin-like protein associated with the nuclear envelope; nuclear basket protein that connects the nuclear pore complex with the nuclear interior; involved with Tel1p in telomere length control; involved with Pml1p and Pml39p in nuclear retention of unspliced mRNAs; MLP1 has a paralog, MLP2, that arose from the whole genome duplication	II	5.71973	4.8125	4.2555	4.17792	3.81762	2.43296	-1.32193			II	II	5	3	0	1	0	0.05	55.5197	2.46256
YDR404C	RPB7	RNA polymerase II subunit B16; forms dissociable heterodimer with Rpb4p; Rpb4/7 dissociates from RNAPII as Ser2 CTD phosphorylation increases; Rpb4/7 regulates cellular lifespan via mRNA decay process; involved in recruitment of 3'-end processing factors to transcribing RNA polymerase II complex, export of mRNA to cytoplasm under stress conditions; also involved in translation initiation	II	5.7115	5.04002	4.62059	3.53605	3.29278	2.10434	-0.736966	-1.73697			III	9	8	0	0	1	-0.207	107.237	4.75648
YBR198C	TAF5	Subunit (90 kDa) of TFIID and SAGA complexes; involved in RNA polymerase II transcription initiation and in chromatin modification	II	5.92125	5.03122	4.49185	4.09592	2.94486	1.67807	0.378512	-0.321928		IV	III	5	9	1	0	0	-0.142	51.7187	2.29397
YDL198C	GGC1	Mitochondrial GTP/GDP transporter; essential for mitochondrial genome maintenance; has a role in mitochondrial iron transport; member of the mitochondrial carrier family	II	4.90207	4.49825	3.83794	3.21723	2.98185	2.16993	1.848	-3.32193	IV		III	11	8	0	1	0	0.416	57.5642	2.55324
YER049W	TPA1	Fe(II)/2-oxoglutarate-dependent dioxygenase family member; catalyzes the repair of methyl-base lesions in both ss and dsDNA by oxidative demethylation; Poly(rA)-binding protein involved in mRNA poly(A) tail length and mRNA stability; role in translation termination efficiency; interacts with Sup45p (eRF1), Sup35p (eRF3) and Pab1p; similar to human prolyl 4-hydroxylase OGFOD1; binds Fe(II) and 2-o…	II	4.81762	4.36457	3.70044	3.15381	2.53605	1.26303	0.378512			II	III	8	6	0	1	0	0.021	151.915	6.73815
YBL002W	HTB2	Histone H2B; core histone protein required for chromatin assembly and chromosome function; nearly identical to HTB1; Rad6p-Bre1p-Lge1p mediated ubiquitination regulates reassembly after DNA replication, transcriptional activation, meiotic DSB formation and H3 methylation	II	6.36107	5.86047	5.1416	4.18587	3.47249	2.45943	0.765535	-1		III	I	10	10	1	0	2		1044.94	46.3478
YDR504C	SPG3	Protein required for high temperature survival during stationary phase; not required for growth on nonfermentable carbon sources	II	5.71425	5.01792	4.62059	4.19377	3.65535	2.88753	0.263034				II	2	0	0	0	0	0.033	12.691	0.562906
YMR044W	IOC4	Member of a complex (Isw1b) with Isw1p and Ioc2p; interacts directly with H3K36me3 nucleosomes through its PWWP domain to recruit the Isw1b complex to open reading frames in a Set2p-dependent manner; Isw1b exhibits nucleosome-stimulated ATPase activity and acts within coding regions to coordinate transcription elongation with termination and processing	II	5.29278	4.03562	3.60881	2.63227	1.48543	0.925999	0.485427	-0.514573		II	II	6	6	0	1	1	-0.134	21.4135	0.94979
YER131W	RPS26B	Protein component of the small (40S) ribosomal subunit; homologous to mammalian ribosomal protein S26, no bacterial homolog; RPS26B has a paralog, RPS26A, that arose from the whole genome duplication	II	5.51412	4.50462	3.72247	2.7866	2.16993	1.32193	0.584963	-1.73697	IV	IV	II	8	9	0	1	0		2605.74	115.577
YER056C	FCY2	Purine-cytosine permease; mediates purine (adenine, guanine, and hypoxanthine) and cytosine accumulation; relative distribution to the vacuole increases upon DNA replication stress	II	6.49345	5.78921	4.71699	4.06178	3.57289	0.925999	-2.32193			III	III	3	2	0	3	0	0.045	230.405	10.2195
YBL076C	ILS1	Cytoplasmic isoleucine-tRNA synthetase; target of the G1-specific inhibitor reveromycin A	II	6.59842	5.16591	4.69488	3.89724	2.72247	0.263034	-0.736966		III	III	II	6	9	0	0	0		722.227	32.0341
YGR210C		Putative protein of unknown function; green fluorescent protein (GFP)-fusion protein localizes to the cytoplasm	II	5.6865	4.37851	4.1127	3.24793	2.29278	0.584963					III	4	6	0	0	0	-0.097	84.6669	3.75537
YNR060W	FRE4	Ferric reductase; reduces a specific subset of siderophore-bound iron prior to uptake by transporters; expression induced by low iron levels	II	5.78921	5.53605	5.17792	4.54844	3.96347	2.926	2.3505	-3.32193		III	III	6	4	0	1	0	-0.552	7.6253	0.338218
YOL120C	RPL18A	Ribosomal 60S subunit protein L18A; intron of RPL18A pre-mRNA forms stem-loop structures that are a target for Rnt1p cleavage leading to degradation; homologous to mammalian ribosomal protein L18, no bacterial homolog; RPL18A has a paralog, RPL18B, that arose from the whole genome duplication	II	8.02126	6.79312	5.91169	4.7761	3.39232	0.584963	-3.32193		IV	III	I	8	7	0	0	0		945.938	41.9568
YDR301W	CFT1	RNA-binding subunit of the mRNA cleavage and polyadenylation factor; involved in poly(A) site recognition and required for both pre-mRNA cleavage and polyadenylation, 51% sequence similarity with mammalian AAUAA-binding subunit of CPSF	II	4.52356	3.70044	2.7866	2.26303	2.1375	0.847997		-1			II	4	10	0	0	1	-0.55	30.4332	1.34986
YNL015W	PBI2	Cytosolic inhibitor of vacuolar proteinase B (PRB1); required for efficient vacuole inheritance; with thioredoxin forms protein complex LMA1, which assists in priming SNARE molecules and promotes vacuole fusion; protein abundance increases in response to DNA replication stress	II	4.66676	3.90689	3.32193	2.51096	1.96347	1	-0.321928				II	6	6	0	0	1	-0.53	81.8966	3.6325
YFL017W-A	SMX2	Core Sm protein Sm G; part of heteroheptameric complex (with Smb1p, Smd1p, Smd2p, Smd3p, Sme1p, and Smx3p) that is part of the spliceosomal U1, U2, U4, and U5 snRNPs; homolog of human Sm G	II	4.90207	4.46597	3.9542	3.56072	2.56072	1.43296	-1.32193	-3.32193		IV	II	7	1	0	1	0	-0.523	68.6363	3.04434
YKL183W	LOT5	Protein of unknown function; gene expression increases in cultures shifted to a lower temperature; protein abundance increases in response to DNA replication stress	II	5.75221	5.50144	4.6837	3.83794	3.66676	2.03562	-3.32193					6	4	0	0	0	0.135	35.7025	1.58357
YDR190C	RVB1	ATP-dependent DNA helicase, also known as pontin; member of the AAA+ and RuvB-like protein families; similar to Rvb2p; conserved component of multiple complexes including the INO80 complex, the Swr1 complex, and the R2TP complex (Rvb1-Rvb2-Tah1-Pih1); involved in multiple processes such as chromatin remodeling, box C/D snoRNP assembly, and RNA polymerase II assembly	II	5.73335	5.02237	4.29278	3.57289	2.37851	1.53605	-0.321928			IV	II	5	7	0	0	0		141.815	6.29014
YDR334W	SWR1	Swi2/Snf2-related ATPase; structural component of the SWR1 complex, which exchanges histone variant H2AZ (Htz1p) for chromatin-bound histone H2A; relocalizes to the cytosol in response to hypoxia; chronological aging factor that mediates lifespan extension by dietary restriction	II	5.6893	4.83794	4.21723	3.66676	2.70044	1.26303	-0.514573	-1.73697			II	7	10	0	0	1	-0.314	28.8583	1.28
YKR081C	RPF2	Essential protein involved in rRNA maturation and ribosomal assembly; involved in the processing of pre-rRNA and the assembly of the 60S ribosomal subunit; interacts with ribosomal protein L11; localizes predominantly to the nucleolus; constituent of 66S pre-ribosomal particles	II	5.63517	4.64386	4.07039	2.90689	2.56072	1.76554				I	II	12	3	0	1	0	0.057	191.533	8.49536
YPL210C	SRP72	Core component of the signal recognition particle (SRP); the SRP is a ribonucleoprotein (RNP) complex that functions in targeting nascent secretory proteins to the endoplasmic reticulum (ER) membrane	II	5.76288	5.15381	3.926	3.67807	2.03562	1.32193			IV	II	III	9	5	0	0	0	0.087	101.965	4.52264
YDR174W	HMO1	Chromatin associated high mobility group (HMG) family member; involved in compacting, bending, bridging and looping DNA; rDNA-binding component that regulates transcription from RNA polymerase I promoters; regulates start site selection of ribosomal protein genes via RNA polymerase II promoters; role in genome maintenance; associates with a 5'-3' DNA helicase and Fpr1p, a prolyl isomerase; reloca…	II	4.74953	4.12101	3.64386	3.24793	2.37851	1.07039	0.485427	-3.32193			II	4	8	2	0	0		245.225	10.8769
YMR091C	NPL6	Component of the RSC chromatin remodeling complex; interacts with Rsc3p, Rsc30p, Ldb7p, and Htl1p to form a module important for a broad range of RSC functions; involved in nuclear protein import and maintenance of proper telomere length	II	4.66676	3.59694	3.48543	3.41954	2.58496	1					III	6	11	0	2	3	0.072	53.0408	2.35261
YNR046W	TRM112	Protein involved in methylation of tRNA, rRNA, and translation factors; also involved in ribosome biogenesis; subunit of tRNA methyltransferase (MTase) complexes in combination with Trm9p and Trm11p; N7-methylates G1575 of 18S rRNA as complex with Bud23p; subunit of complex with Mtq2p that methylates Sup45p (eRF1) in the ternary complex eRF1-eRF3-GTP; relative distribution to the nucleus increase…	II	4.62059	3.16993	2.23266	2.23266	1.88752	1.848	0.678072	-0.514573		II	IV	10	7	0	0	0	-0.249	164.296	7.28727
YDR496C	PUF6	Pumilio-homology domain protein; binds the 3' UTR of ASH1 mRNA and represses its translation, resulting in proper asymmetric localization of ASH1 mRNA; required at post-transcriptional step for efficient retrotransposition; absence results in decreased Ty1 Gag:GFP protein levels; co-sediments with the 60S ribosomal subunit and is required for its biogenesis	II	5.67525	4.65535	4.3505	3.67807	3.01792	2.16993	-2.32193			I	II	12	4	1	1	0	0.095	226.029	10.0254
YER110C	KAP123	Karyopherin beta; mediates nuclear import of ribosomal proteins prior to assembly into ribosomes and import of histones H3 and H4; localizes to the nuclear pore, nucleus, and cytoplasm; exhibits genetic interactions with RAI1	II	5.46271	4.90689	3.70044	2.56072	2.26303	0.485427	0.263034	-0.152003		II	III	8	8	0	0	1	-0.085	401.026	17.7874
YKL180W	RPL17A	Ribosomal 60S subunit protein L17A; copurifies with the Dam1 complex (aka DASH complex); homologous to mammalian ribosomal protein L17 and bacterial L22; RPL17A has a paralog, RPL17B, that arose from the whole genome duplication; protein abundance increases in response to DNA replication stress	II	5.40259	4.56682	4.03562	3.44626	2.82782	2.10434	1.1375	-1.32193			II	9	10	0	0	1		1518.73	67.3627
YEL044W	IES6	Component of the INO80 chromatin remodeling complex; critical for INO80 function; involved in regulation of chromosome segregation and maintenance of normal centromeric chromatin structure; human ortholog INO80C is a member of the human INO80 complex; implicated in DNA repair based on genetic interactions with RAD52 epistasis genes	II	4.853	4.27799	4.05311	3.44626	3.39232	0.847997	-1.32193	-1.73697				9	7	0	1	0	-0.644	45.9093	2.03629
YBR189W	RPS9B	Protein component of the small (40S) ribosomal subunit; homologous to mammalian ribosomal protein S9 and bacterial S4; RPS9B has a paralog, RPS9A, that arose from the whole genome duplication	II	6.72656	5.50779	4.70044	3.926	3.21723	2.3505	1	-2.32193		I	II	8	2	0	1	0		2283.2	101.271
YIL131C	FKH1	Forkhead family transcription factor; minor role in expression of G2/M phase genes; negatively regulates transcription elongation; positive role in chromatin silencing at HML, HMR; facilitates clustering and activation of early-firing replication origins; binds to recombination enhancer near HML, regulates donor preference during mating-type switching; relocalizes to cytosol in response to hypoxi…	II	5.03562	4.61471	4.14568	3.05311	2.76553	2.10434	1.1375	-1			III	5	10	0	0	1	0.024	46.7625	2.07414
YKL058W	TOA2	TFIIA small subunit; involved in transcriptional activation, acts as antirepressor or as coactivator; required, along with Toa1p, for ribosomal protein gene transcription in vivo; homologous to smallest subunit of human and Drosophila TFIIA; protein abundance increases in response to DNA replication stress	II	5.31107	4.66676	3.97269	3.23266	1.926	1	0.584963	-3.32193			III	7	8	0	0	1	-0.12	99.8266	4.42778
YGR081C	SLX9	Protein required for pre-rRNA processing; associated with the 90S pre-ribosome and 43S small ribosomal subunit precursor; interacts with U3 snoRNA; deletion mutant has synthetic fitness defect with an sgs1 deletion mutant	II	5.48864	4.97269	3.94486	3.05311	2.51096	1.88752	1.58496	-1.32193		III	II	9	3	0	1	0	0.039	99.2968	4.40427
YNL327W	EGT2	Glycosylphosphatidylinositol (GPI)-anchored cell wall endoglucanase; required for proper cell separation after cytokinesis; expression is activated by Swi5p and tightly regulated in a cell cycle-dependent manner	II	5.03122	4.26303	3.7115	3.10434	2.51096	1.43296	-0.736966	-2.32193				8	10	0	0	0	-0.333	158.657	7.03716
YDR060W	MAK21	Constituent of 66S pre-ribosomal particles; required for large (60S) ribosomal subunit biogenesis; acts as part of a Mak21p-Noc2p-Rrp5p module that associates with nascent pre-rRNA during transcription and has a role in bigenesis of the large ribosomal subunit; involved in nuclear export of pre-ribosomes; required for maintenance of dsRNA virus; homolog of human CAATT-binding protein	II	4.76553	4.09592	3.36457	2.40599	2.03562	1.76554		-2.32193	IV	I	II	12	4	0	2	0	-0.265	183.336	8.13179
YDL160C	DHH1	Cytoplasmic DExD/H-box helicase, stimulates mRNA decapping; coordinates distinct steps in mRNA function and decay, interacts with both the decapping and deadenylase complexes, role in translational repression, mRNA decay, and processing body dynamics; may have a role in mRNA export; C-terminus of Dhh1p interacts with Ngr1p and promotes POR1, but not EDC1 mRNA decay; forms cytoplasmic foci upon DN…	II	5.31107	4.96347	4.58496	3.54844	2.32193	1.88752	0.847997	-2.32193			II	8	4	0	0	1	-0.529	169.818	7.53221
YMR116C	ASC1	G-protein beta subunit and guanine dissociation inhibitor for Gpa2p; ortholog of RACK1 that inhibits translation; core component of the small (40S) ribosomal subunit; required to prevent frameshifting at ribosomes stalled at repeated CGA codons; regulates P-body formation induced by replication stress; represses Gcn4p in the absence of amino acid starvation	II	6.22689	5.55765	4.88264	4.22497	3.30743	2	0.263034	-2.32193		II	II	10	9	0	1	0		2553.12	113.243
YOR103C	OST2	Epsilon subunit of the oligosaccharyltransferase complex; located in the ER lumen; catalyzes asparagine-linked glycosylation of newly synthesized proteins	II	5.30743	4.08746	3.74416	2.70044	1.43296	0.584963	0.137504	-3.32193		I	III	10	7	0	1	0	0.693	125.825	5.58093
YMR161W	HLJ1	Co-chaperone for Hsp40p; anchored in the ER membrane; with its homolog Ydj1p promotes ER-associated protein degradation (ERAD) of integral membrane substrates; similar to E. coli DnaJ	II	5.73877	5.22497	4.60288	3.63227	3.29278	2.48543	0.925999	0.137504		II	II	7	4	1	2	0	0.166	42.955	1.90525
YBL006C	LDB7	Component of the RSC chromatin remodeling complex; interacts with Rsc3p, Rsc30p, Npl6p, and Htl1p to form a module important for a broad range of RSC functions	II	5.27426	4.54844	3.926	2.43296	1.26303	1.07039	-0.736966	-2.32193		II	II	3	3	0	1	1	-0.123	65.1561	2.88998
YOL004W	SIN3	Component of both the Rpd3S and Rpd3L histone deacetylase complexes; involved in transcriptional repression and activation of diverse processes, including mating-type switching and meiosis; involved in the maintenance of chromosomal integrity	II	4.20163	3.49825	3.05311	2.88753	2.76553	0.678072	0.584963	0.137504		IV	II	10	11	0	0	3	-0.085	78.6202	3.48717
YKL068W	NUP1	FG-nucleoporin component of central core of the nuclear pore complex; contributes directly to nucleocytoplasmic transport and maintenance of the nuclear pore complex (NPC) permeability barrier and is involved in gene tethering at the nuclear periphery; NUP100 has a paralog, NUP116, that arose from the whole genome duplication	II	6.48543	5.6893	4.98185	4	3.43296	2.76553	-0.152003	-3.32193		III	III	10	12	1	0	1	-0.295	70.1991	3.11366
YDL076C	RXT3	Component of the Rpd3L histone deacetylase complex; involved in histone deacetylation; protein abundance increases in response to DNA replication stress	II	4.89724	4.04439	2.94486	2.74416	1.926	1.53605	0.847997	-1			III	6	9	1	1	0	-0.068	32.1431	1.4257
YPL004C	LSP1	Eisosome core component; eisosomes are large immobile patch structures at the cell cortex associated with endocytosis; phosphorylated on Thr233 upon Pkc1p hyperactivation in a Slt2p MAPK-dependent fashion; null mutants show activation of Pkc1p/Ypk1p stress resistance pathways; member of the BAR domain family	II	6.23841	5.35755	4.67807	4.23266	3.20163	1.88752	-0.514573				II	2	10	0	1	0	0.211	161.717	7.17288
YCR057C	PWP2	Conserved 90S pre-ribosomal component; essential for proper endonucleolytic cleavage of the 35 S rRNA precursor at A0, A1, and A2 sites; contains eight WD-repeats; PWP2 deletion leads to defects in cell cycle and bud morphogenesis	II	5.76553	4.24031	4.00899	3.30743	2.1375					IV	III	5	3	1	0	0	-0.225	130.983	5.80971
YBR060C	ORC2	Subunit of the origin recognition complex (ORC); ORC directs DNA replication by binding to replication origins and is also involved in transcriptional silencing; interacts with Spp1p and with trimethylated histone H3; phosphorylated by Cdc28p	II	6.1416	5.55765	4.29278	4.19377	3.29278	3.15381					II	6	9	0	0	0	-0.024	34.3492	1.52355
YBL052C	SAS3	Histone acetyltransferase catalytic subunit of NuA3 complex; acetylates histone H3, involved in transcriptional silencing; homolog of the mammalian MOZ proto-oncogene; mutant has aneuploidy tolerance; sas3gcn5 double mutation is lethal	II	5.90448	5.3505	4.79181	3.48543	3.23266	2.40599	2	-2.32193			II	7	9	0	0	1	-0.355	24.0645	1.06737
YMR072W	ABF2	Mitochondrial DNA-binding protein; involved in mitochondrial DNA replication and recombination, member of HMG1 DNA-binding protein family; activity may be regulated by protein kinase A phosphorylation; ABF2 has a paralog, IXR1, that arose from the whole genome duplication	II	4.39232	3.87774	2.98185	1.48543							III	5	4	0	0	0	-0.033	221.321	9.81662
YDR281C	PHM6	Protein of unknown function; expression is regulated by phosphate levels	II	5.38197	4.06178	3.37851	1.58496	1.26303	-0.321928	-3.32193					4	1	0	0	1	-0.681	33.4642	1.48429
YDR280W	RRP45	Exosome non-catalytic core component; involved in 3'-5' RNA processing and degradation in both the nucleus and the cytoplasm; has similarity to E. coli RNase PH and to human hRrp45p (PM/SCL-75, EXOSC9); protein abundance increases in response to DNA replication stress	II	4.1127	3.67807	3.29278	2.88753	2.848	-2.32193	-2.32193				III	5	7	1	0	2	-0.26	75.4848	3.34811
YNL075W	IMP4	Component of the SSU processome; SSU processome is required for pre-18S rRNA processing; interacts with Mpp10p; member of a superfamily of proteins that contain a sigma(70)-like motif and associate with RNAs	II	4.57289	3.93546	2.7866	2.60881	2.45943						III	4	7	0	0	0	0.258	127.104	5.63765
YJL187C	SWE1	Protein kinase that regulates the G2/M transition; regulates the G2/M transition by inhibition of Cdc28p kinase activity; localizes to the nucleus and to the daughter side of the mother-bud neck; phosphorylates conserved tyrosine residue in N-terminus of Hsp90 in cell-cycle associated manner, thus modulating the ability of Hsp90 to chaperone a selected clientele; homolog of S. pombe Wee1p; potent…	II	3.03562	3	3	2.96347	2.16993	-3.32193						5	9	0	0	1	0.071	32.4541	1.43949
YOR079C	ATX2	Golgi membrane protein involved in manganese homeostasis; overproduction suppresses the sod1 (copper, zinc superoxide dismutase) null mutation	II	3.79701	3.18587	1.72247	1.63227	1.48543	0.263034	-3.32193				III	7	6	0	0	1	0.049	34.034	1.50957
YLL045C	RPL8B	Ribosomal 60S subunit protein L8B; required for processing of 27SA3 pre-rRNA to 27SB pre-rRNA during assembly of large ribosomal subunit; depletion leads to a turnover of pre-rRNA; L8 binds to Domain I of 25S and 5.8 S rRNAs; mutation results in decreased amounts of free 60S subunits; homologous to mammalian ribosomal protein L7A, no bacterial homolog; RPL8B has a paralog, RPL8A, that arose from …	II	3.56072	2.60881	2.26303	1.848	0.678072	-0.152003	-3.32193			III		8	8	0	0	1		2123.95	94.2071
YBR206W		Dubious open reading frame; unlikely to encode a functional protein, based on available experimental and comparative sequence data; partially overlaps the verified gene KTR3	II	4.19377	3.87774	3.08746	2.67807	2.45943		-1.32193					#N/A	#N/A	1	0	0		31.6613	1.40433
YMR194C-A		Dubious open reading frame; unlikely to encode a functional protein, based on available experimental and comparative sequence data	II	4.72792	3.90689	3.15381	2.20163	1.26303	-0.736966	-1.32193				II	#N/A	#N/A	0	0	1		4.3869	0.194579
YJL158C	CIS3	Mannose-containing glycoprotein constituent of the cell wall; member of the PIR (proteins with internal repeats) family	II	4.82782	4.20163	3.53605	2.80735		-0.321928				I	III	5	1	0	1	0		640.822	28.4235
YHR128W	FUR1	Uracil phosphoribosyltransferase; synthesizes UMP from uracil; involved in the pyrimidine salvage pathway	II	6.21917	4.74953	4.17792	2.98185	1.58496	-0.736966	-3.32193				III	6	8	0	0	1		370.411	16.4295
YOR206W	NOC2	Protein involved in ribosome biogenesis; forms a nucleolar complex with Mak21p that binds to 90S and 66S pre-ribosomes; forms a nuclear complex with Noc3p that binds to 66S pre-ribosomes; both complexes mediate intranuclear transport of ribosomal precursors; acts as part of a Mak21p-Noc2p-Rrp5p module that associates with nascent pre-rRNA during transcription and has a role in bigenesis of the la…	II	4.50462	3.81762	2.8679	1.1375	-0.321928	-0.514573	-1.73697			II	III	12	4	0	1	0	-0.099	210.106	9.31918
YER056C-A	RPL34A	Ribosomal 60S subunit protein L34A; homologous to mammalian ribosomal protein L34, no bacterial homolog; RPL34A has a paralog, RPL34B, that arose from the whole genome duplication	II	5.6893	4.41278	3.27799	2.16993	2.07039	-0.152003			IV	IV	III	5	4	1	0	0		934.198	41.436
YFR001W	LOC1	Nuclear protein involved in asymmetric localization of ASH1 mRNA; binds double-stranded RNA in vitro; constituent of 66S pre-ribosomal particles; required at post-transcriptional step for efficient retrotransposition; absence results in decreased Ty1 Gag:GFP protein levels; relocalizes from nucleus to cytoplasm upon DNA replication stress	II	6.3505	5.91169	5.1375	2.80735	1.67807	0.263034	-3.32193	-3.32193		II	II	7	9	0	1	0	-0.385	77.313	3.42919
YMR316W	DIA1	Protein of unknown function; involved in invasive and pseudohyphal growth; green fluorescent protein (GFP)-fusion protein localizes to the cytoplasm in a punctate pattern	II	5.22497	4.73335	4.23266	3.56072	1.37851	-3.32193					III	1	4	0	0	0	-0.002	44.0418	1.95346
YOR283W		Phosphatase with a broad substrate specificity; has some similarity to GPM1/YKL152C, a phosphoglycerate mutase; YOR283W is not an essential gene	II	4.34341	3.72247	2.926	2.53605	1.926	0.378512	-3.32193			IV	IV	6	2	0	1	0	0.096	106.492	4.7234
YLR109W	AHP1	Thiol-specific peroxiredoxin; reduces hydroperoxides to protect against oxidative damage; function in vivo requires covalent conjugation to Urm1p	II	6.45943	5.22882	4.29278	2.82782	1	-1	-3.32193		I			4	8	0	0	1		3208.18	142.298
YBR121C	GRS1	Cytoplasmic and mitochondrial glycyl-tRNA synthase; ligates glycine to the cognate anticodon-bearing tRNA; transcription termination factor that may interact with the 3'-end of pre-mRNA to promote 3'-end formation; GRS1 has a paralog, GRS2, that arose from the whole genome duplication; human homolog GARS implicated in Charcot-Marie-Tooth disease, can complement yeast null mutant	II	5.19377	3.88753	3.43296	1.63227	-0.514573	-0.736966	-1		II	I		10	9	0	1	0		560.114	24.8437
YLR061W	RPL22A	Ribosomal 60S subunit protein L22A; required for the oxidative stress response in yeast; homologous to mammalian ribosomal protein L22, no bacterial homolog; RPL22A has a paralog, RPL22B, that arose from the whole genome duplication	II	4	3.21723	2.58496	1.88752	1.07039	0.584963	-1.73697					6	4	0	0	1		1568.15	69.555
YKL006W	RPL14A	Ribosomal 60S subunit protein L14A; N-terminally acetylated; homologous to mammalian ribosomal protein L14, no bacterial homolog; RPL14A has a paralog, RPL14B, that arose from the whole genome duplication	II	6.32193	4.82273	3.12101	1.926		-1.32193					II	3	7	0	0	1		219.98	9.75713
YDR451C	YHP1	Homeobox transcriptional repressor; binds Mcm1p and early cell cycle box (ECB) elements of cell cycle regulated genes, thereby restricting ECB-mediated transcription to the M/G1 interval; YHP1 has a paralog, YOX1, that arose from the whole genome duplication	II	5.40599	4.80219	3.99096	3.40599	1.96347		-3.32193	-3.32193		IV	III	9	8	0	0	1	0.326	28.4903	1.26368
YGR037C	ACB1	Acyl-CoA-binding protein; transports newly synthesized acyl-CoA esters from fatty acid synthetase (Fas1p-Fas2p) to acyl-CoA-consuming processes; subject to starvation-induced, Grh1p-mediated unconventional secretion; protein abundance increases in response to DNA replication stress	II	4.64961	3.30743	2.67807	1.58496	0.765535	-1.73697			III	III	III	2	5	0	1	1		863.369	38.2945
YBR067C	TIP1	Major cell wall mannoprotein with possible lipase activity; transcription is induced by heat- and cold-shock; member of the Srp1p/Tip1p family of serine-alanine-rich proteins	II	5.21335	4.56682	4.14568	3.53605	0.678072	-1.73697	-2.32193			IV	III	0	1	0	0	0		291.008	12.9076
YLR002C	NOC3	Subunit of a nuclear complex with Noc2p and pre-replicative complexes; the Noc2p-Noc3p complex binds to 66S ribosomal precursors to mediate their maturation and intranuclear transport; binds to chromatin at active replication origins, and is required for pre-RC formation and maintenance during DNA replication licensing	II	4.27053	3.36457	3.16993	2.29278							III	10	8	0	0	1	-0.132	88.1074	3.90797
YGL232W	TAN1	Putative tRNA acetyltransferase; RNA-binding protein required for the formation of the modified nucleoside N(4)-acetylcytidine in serine and leucine tRNAs but not required for the same modification in 18S rRNA; protein abundance increases in response to DNA replication stress	II	3.72247	2.8679	2.63227	2.1375	1.48543	-0.736966	-1					7	6	0	0	0	0.165	88.7783	3.93773
YGR282C	BGL2	Endo-beta-1,3-glucanase; major protein of the cell wall, involved in cell wall maintenance; involved in incorporation of newly synthesized mannoprotein molecules into the cell wall	II	3.60881	3.03562	2.74416	2.32193	1.63227	0.678072	-1.73697		IV	IV	III	3	6	0	0	1		743.793	32.9907
YNL141W	AAH1	Adenine deaminase (adenine aminohydrolase); converts adenine to hypoxanthine; involved in purine salvage; transcriptionally regulated by nutrient levels and growth phase; Aah1p degraded upon entry into quiescence via SCF and the proteasome	II	5.87036	5.2854	4.92125	3.73335	2.96347	-0.514573	-2.32193			I	II	4	5	0	1	1		221.819	9.83873
YLR186W	EMG1	Methyltransferase for rRNA; catalyzes methylation of the pseudouridine residue 1191 of 18S rRNA; member of the SPOUT methyltransferase family; required for maturation of 18S rRNA and for 40S ribosomal subunit production independently of methyltransferase activity; forms homodimers; human ortholog is mutated in Bowen-Conradi syndrome, and the equivalent mutation in yeast affects Emg1p dimerization…	II	3.8679	3.67807	2.60881	2.3505	1.37851	-0.736966	-3.32193			I	II	8	9	0	1	0	0.205	174.309	7.73141
YLR399C	BDF1	Protein involved in transcription initiation; functions at TATA-containing promoters; associates with the basal transcription factor TFIID; contains two bromodomains; corresponds to the C-terminal region of mammalian TAF1; redundant with Bdf2p; BDF1 has a paralog, BDF2, that arose from the whole genome duplication	II	3.90689	3.59694	2.70044	1.67807	1.20163	-1.32193					II	6	6	0	0	1	0.419	89.257	3.95897
YJR104C	SOD1	Cytosolic copper-zinc superoxide dismutase; detoxifies superoxide; stabilizes Yck1p and Yck2p kinases in glucose to repress respiration; phosphorylated by Dun1p, enters nucleus under oxidative stress to promote transcription of stress response genes; human ortholog SOD1 implicated in ALS and complements yeast null; abundance increases under DNA replication stress and during exposure to boric acid…	II	5.05745	3.88753	3.57289	1.88752	1.1375	-1.32193			II	II	III	3	4	0	0	0		1154.46	51.2058
YMR290C	HAS1	ATP-dependent RNA helicase; involved in the biogenesis of 40S and 60S ribosome subunits; localizes to both the nuclear periphery and nucleolus; highly enriched in nuclear pore complex fractions; constituent of 66S pre-ribosomal particles	II	4.79701	4.06178	3.51096	2.96347	2.7866	1.88752	-3.32193		IV	I	II	11	9	0	1	0	-0.115	251.524	11.1563
YBR106W	PHO88	Probable membrane protein; involved in phosphate transport; role in the maturation of secretory proteins; pho88 pho86 double null mutant exhibits enhanced synthesis of repressible acid phosphatase at high inorganic phosphate concentrations	II	5.25927	4.58496	3.66676	2.65535	1.1375	0.485427				III	III	9	5	0	0	1		934.533	41.4509
YLR175W	CBF5	Pseudouridine synthase catalytic subunit of box H/ACA snoRNPs; acts on large and small rRNAs, on snRNA U2, and on some mRNAs; mutations in human ortholog dyskerin cause the disorder dyskeratosis congenita; small nucleolar ribonucleoprotein particles are also known as snoRNPs	II	4.24031	3.81762	2.96347	1.848	1.20163	0.584963	0.137504		IV	I	III	12	4	0	1	0		373.744	16.5773
YKR060W	UTP3	Putative subunit of U3-containing 90S preribosome complex; complex is involved in production of 18S rRNA and assembly of small ribosomal subunit	II	4.05311	2.7866	2.56072	2.07039	0.378512	0.263034	-3.32193				III	7	7	0	0	0	0.131	62.4792	2.77125
YLR418C	CDC73	Component of the Paf1p complex; binds to and modulates the activity of RNA polymerases I and II; required for expression of certain genes, modification of some histones, and telomere maintenance; involved in transcription elongation as demonstrated by the G-less-based run-on (GLRO) assay; protein abundance increases in response to DNA replication stress; human homologue, parafibromin, is a tumour…	II	4.2555	3.90689	3.07039	2.16993	2.1375	-0.321928				IV		12	9	0	2	0	0.171	39.0836	1.73354
YJR101W	RSM26	Mitochondrial ribosomal protein of the small subunit	II	3.75489	3.27799	2.60881	2.23266	1.53605	-0.736966			III			1	8	2	0	1	0.318	65.0459	2.88509
YGR056W	RSC1	Component of the RSC chromatin remodeling complex; required for expression of mid-late sporulation-specific genes; contains two essential bromodomains, a bromo-adjacent homology (BAH) domain, and an AT hook; RSC1 has a paralog, RSC2, that arose from the whole genome duplication	II	4.80219	4.48543	3.07039	2.72247	-0.152003							4	10	1	0	2	-0.02	27.4895	1.21929
YPL149W	ATG5	Conserved protein involved in autophagy and the Cvt pathway; undergoes conjugation with Atg12p to form a complex involved in Atg8p lipidation; Atg5p-Atg12p conjugate also forms a complex with Atg16p; the Atg5-Atg12/Atg16 complex binds to membranes and is essential for autophagosome formation; also involved in methionine restriction extension of chronological lifespan in an autophagy-dependent man…	II	4.06178	3.66676	2.43296	2.3505	2.26303	-0.321928						6	1	0	0	0	0.03	41.9057	1.85871
YER089C	PTC2	Type 2C protein phosphatase (PP2C); dephosphorylates Hog1p to limit maximal osmostress induced kinase activity; dephosphorylates Ire1p to downregulate the unfolded protein response; dephosphorylates Cdc28p; inactivates the DNA damage checkpoint; PTC2 has a paralog, PTC3, that arose from the whole genome duplication	II	4.26303	3.47249	3	1.48543	0.378512	-1.73697	-3.32193			IV		8	5	0	0	0	0.008	97.1134	4.30743
YGR264C	MES1	Methionyl-tRNA synthetase; forms a complex with glutamyl-tRNA synthetase (Gus1p) and Arc1p, which increases the catalytic efficiency of both tRNA synthetases; also has a role in nuclear export of tRNAs; mutations in human ortholog MARS are associated with pediatric pulmonary alveolar proteinosis	II	5.1416	3.7866	3.41954	2.20163	1.32193	-3.32193					III	4	7	0	0	0		421.398	18.691
YDR308C	SRB7	Subunit of the RNA polymerase II mediator complex; associates with core polymerase subunits to form the RNA polymerase II holoenzyme; essential for transcriptional regulation; target of the global repressor Tup1p	II	4.93074	3.10434	2.67807	2.3505	2.26303	0.765535	-3.32193	-3.32193	III	II	II	10	3	1	2	0	-0.145	52.7011	2.33754
YER140W	EMP65	Integral membrane protein of the ER; forms an ER-membrane associated protein complex with Slp1p; identified along with SLP1 in a screen for mutants defective in the unfolded protein response (UPR); proposed to function in the folding of integral membrane proteins; interacts genetically with MPS3; the authentic, non-tagged protein is detected in highly purified mitochondria in high-throughput stud…	II	4.30012	3.67807	3.23266	3.03562	2.56072	2.45943	-3.32193				III	6	5	1	1	0	0.021	18.4397	0.817886
YLR055C	SPT8	Subunit of the SAGA transcriptional regulatory complex; not present in SAGA-like complex SLIK/SALSA; required for SAGA-mediated inhibition at some promoters	II	5.01792	4.27053	3.37851	2	1.848	1.07039	-1.73697				III	7	11	0	0	1	-0.569	18.0129	0.798958
YDR325W	YCG1	Subunit of the condensin complex; required for establishment and maintenance of chromosome condensation, chromosome segregation and chromatin binding of the condensin complex; required for clustering of tRNA genes at the nucleolus; required for replication slow zone (RSZ) breakage following Mec1p inactivation	II	5.1375	4.6893	3.926	2.23266	2	-2.32193	-3.32193			III	III	3	6	0	1	1	-0.085	26.037	1.15486
YPR171W	BSP1	Adapter that links synaptojanins to the cortical actin cytoskeleton; the synaptojanins are Inp52p and Inp53p	II	5.02237	3.83794	3.39232	3.3505	1.26303		-3.32193				III	2	10	0	0	1	0.321	27.4388	1.21704
YAL034W-A	MTW1	Essential component of the MIND kinetochore complex; joins kinetochore subunits contacting DNA to those contacting microtubules; critical to kinetochore assembly; complex consists of Mtw1p Including Nnf1p-Nsl1p-Dsn1p (MIND)	II	4.20163	3.45943	3.15381	1.76554	1.72247	-0.736966					III	10	5	0	1	0	-0.197	10.6544	0.472574
YOR123C	LEO1	Component of the Paf1 complex; which associates with RNA polymerase II and is involved in histone methylation; plays a role in regulating Ty1 transposition; involved in transcription elongation as demonstrated by the G-less-based run-on (GLRO) assay	II	4.73877	3.99096	1.848	1.53605	0.378512	-0.736966	-2.32193	-3.32193				10	10	0	0	0	-0.28	19.9265	0.883832
YBL004W	UTP2	Component of the small-subunit (SSU) processome; SSU processome is involved in the biogenesis of the 18S rRNA	II	4.66106	3.93546	2.67807	1.48543	-0.321928	-1.73697	-2.32193			I	III	8	3	0	1	0	-0.217	145.368	6.44775
YJR070C	LIA1	Deoxyhypusine hydroxylase; HEAT-repeat containing metalloenzyme that catalyzes hypusine formation; binds to and is required for the modification of Hyp2p (eIF5A); complements S. pombe mmd1 mutants defective in mitochondrial positioning; protein abundance increases in response to DNA replication stress	II	5.95652	4.7866	3.80735	2.48543	0.485427	-0.736966			III			13	3	0	1	0		418.73	18.5726
YHR013C	ARD1	Subunit of protein N-terminal acetyltransferase NatA; NatA is comprised of Nat1p, Ard1p, and Nat5p; acetylates many proteins and thus affects telomeric silencing, cell cycle, heat-shock resistance, mating, and sporulation; human Ard1p levels are elevated in cancer cells; protein abundance increases in response to DNA replication stress	II	4.37851	3.40599	3.08746	1.48543	1.20163	-2.32193				IV	III	3	4	0	0	0	-0.021	147.055	6.5226
YOR151C	RPB2	RNA polymerase II second largest subunit B150; part of central core; similar to bacterial beta subunit	II	5.19377	4.06178	2.926	1.96347	1.26303	0.847997	-0.514573				III	9	8	0	0	1	-0.089	166.597	7.38936
YML048W	GSF2	Endoplasmic reticulum (ER) localized integral membrane protein; may promote secretion of certain hexose transporters, including Gal2p; involved in glucose-dependent repression	II	5.04876	3.93546	3.12101	2.20163	1.53605	-2.32193	-2.32193	-3.32193			II	8	3	0	0	0	0.205	185.787	8.24052
YDR262W		Putative protein of unknown function; green fluorescent protein (GFP)-fusion protein localizes to the vacuole and is induced in response to the DNA-damaging agent MMS; gene expression increases in response to Zymoliase treatment	II	2.926	2.90689	2.67807	2.65535	2.58496	-3.32193						5	4	0	0	0	-0.302	56.4912	2.50565
YNL002C	RLP7	Nucleolar protein similar to large ribosomal subunit L7 proteins; constituent of 66S pre-ribosomal particles; plays an essential role in processing of precursors to the large ribosomal subunit RNAs; binds junction of ITS2 and ITS2-proximal stem between the 3' end of 5.8S rRNA and the 5' end of 25S rRNA	II	4.59096	4.18587	3.64386	2.88753	1.848	-2.32193	-3.32193			I	II	9	3	0	0	0		232.56	10.3151
YGL054C	ERV14	COPII-coated vesicle protein; involved in vesicle formation and incorporation of specific secretory cargo; required for the delivery of bud-site selection protein Axl2p to cell surface; related to Drosophila cornichon; ERV14 has a paralog, ERV15, that arose from the whole genome duplication	II	3.97269	3.15381	2.45943	2	0.847997						II	5	7	1	0	1		156.884	6.95856
YHR149C	SKG6	Integral membrane protein; localizes primarily to growing sites such as the bud tip or the cell periphery; potential Cdc28p substrate; Skg6p interacts with Zds1p and Zds2p; SKG6 has a paralog, TOS2, that arose from the whole genome duplication	II	4	3.60881	2.60881	1.26303	1.07039	-2.32193	-2.32193				III	8	6	0	0	1	-0.093	37.7843	1.67591
YPL082C	MOT1	Essential protein involved in regulation of transcription; removes Spt15p (TBP) from DNA via its C-terminal ATPase activity; may have a role in ensuring that soluble TBP is available to bind TATA-less promoters; forms a complex with TBP that binds TATA DNA with high affinity but with altered specificity; the Mot1p-Spt15p-DNA ternary complex contains unbent DNA	II	5.42962	3.83794	2.80735	2.20163	1.88752					III	III	8	10	0	1	0	-0.432	56.8252	2.52046
YAL011W	SWC3	Protein of unknown function; component of the SWR1 complex, which exchanges histone variant H2AZ (Htz1p) for chromatin-bound histone H2A; required for formation of nuclear-associated array of smooth endoplasmic reticulum known as karmellae	II	5.14975	4.7866	3.90689	2.26303	1.26303	-1	-2.32193			III	III	13	10	0	1	0	0.31	14.6497	0.649784
YDR087C	RRP1	Essential evolutionarily conserved nucleolar protein; necessary for biogenesis of 60S ribosomal subunits and for processing of pre-rRNAs to mature rRNA; associated with several distinct 66S pre-ribosomal particles	II	5.1334	3.76553	3.16993	3.07039	-0.321928	-1.32193	-1.73697			IV	II	8	6	0	0	1	0.366	159.079	7.05588
YMR049C	ERB1	Constituent of 66S pre-ribosomal particles; forms a complex with Nop7p and Ytm1p that is required for maturation of the large ribosomal subunit; required for maturation of the 25S and 5.8S ribosomal RNAs; homologous to mammalian Bop1	II	3.47249	3.41954	2.45943	2.40599	2.03562					I	II	12	5	0	1	0	-0.144	153.02	6.78716
YDR345C	HXT3	Low affinity glucose transporter of the major facilitator superfamily; expression is induced in low or high glucose conditions; HXT3 has a paralog, HXT5, that arose from the whole genome duplication	II	3.75489	3.45943	2.03562	1.07039	0.765535	-0.514573	-1.73697				III	6	5	0	1	0		680.435	30.1805
YIL158W	AIM2	Putative protein of unknown function; overexpression causes cell cycle delay or arrest; green fluorescent protein (GFP)-fusion protein localizes to vacuole; null mutant displays elevated frequency of mitochondrial genome loss; relocalizes from nucleus to cytoplasm upon DNA replication stress; AIM20 has a paralog, SKG1, that arose from the whole genome duplication	II	3.96347	3.56072	3.33628	2.8679	1.63227	-2.32193			IV		III	4	9	0	0	0	-0.486	62.3034	2.76345
YLR021W	IRC25	Component of a heterodimeric Poc4p-Irc25p chaperone; involved in assembly of alpha subunits into the 20S proteasome; may regulate formation of proteasome isoforms with alternative subunits under different conditions	II	4.90207	4.50462	4.30743	2.26303	1.80736	0.485427	-3.32193				II	2	4	0	0	0	0.241	46.8205	2.07671
YIL133C	RPL16A	Ribosomal 60S subunit protein L16A; N-terminally acetylated, binds 5.8 S rRNA; transcriptionally regulated by Rap1p; homologous to mammalian ribosomal protein L13A and bacterial L13; RPL16A has a paralog, RPL16B, that arose from the whole genome duplication; protein abundance increases in response to DNA replication stress	II	5.18982	4.3147	3.64386	2.53605	1.32193		-1.73697					9	4	0	1	0		1163.49	51.6062
YKL127W	PGM1	Phosphoglucomutase, minor isoform; catalyzes the conversion from glucose-1-phosphate to glucose-6-phosphate, which is a key step in hexose metabolism; PGM1 has a paralog, PGM2, that arose from the whole genome duplication	II	5.43962	4.39917	3.23266	2.45943	1.32193	-1.32193	-3.32193				III	5	4	0	0	0	-0.012	116.462	5.16565
YDR091C	RLI1	Essential Fe-S protein; required for ribosome biogenesis, translation initiation/termination; facilitates binding of multifactor complex (MFC) of initiation factors to small ribosomal subunit; Dom34-Hbs1 complex and Rli1p work in dissociating inactive ribosomes, thereby facilitating translation restart; forms complex with Lto1p and Yae1p; dependency on ROS-labile FeS clusters, activity in nuclear…	II	4.83289	4.12928	3.41954	2.23266	1.1375	0.137504	-0.736966			III	III	7	5	0	1	0	-0.032	234.747	10.4121
YLR009W	RLP24	Essential protein required for ribosomal large subunit biogenesis; associated with pre-60S ribosomal subunits; stimulates the ATPase activity of Afg2p, which is required for release of Rlp24p from the pre-60S particle; has similarity to Rpl24Ap and Rpl24Bp	II	4.24031	3.75489	2.848	2.16993					IV	I	II	12	4	0	1	0		336.54	14.9271
YNL167C	SKO1	Basic leucine zipper transcription factor of the ATF/CREB family; forms a complex with Tup1p and Cyc8p to both activate and repress transcription; cytosolic and nuclear protein involved in osmotic and oxidative stress responses	II	4.7761	4.08746	3.08746	2.7866	2.26303	1.96347	-3.32193				III	5	4	1	0	0	-0.019	25.0772	1.11229
YOR375C	GDH1	NADP(+)-dependent glutamate dehydrogenase; synthesizes glutamate from ammonia and alpha-ketoglutarate; rate of alpha-ketoglutarate utilization differs from Gdh3p; expression regulated by nitrogen and carbon sources; GDH1 has a paralog, GDH3, that arose from the whole genome duplication	II	5.3147	3.51096	1.88752	0.137504	0.137504		-3.32193					6	4	0	0	0		332.337	14.7407
YLR401C	DUS3	Dihydrouridine synthase; member of a widespread family of conserved proteins including Smm1p, Dus1p, and Dus4p; contains a consensus oleate response element (ORE) in its promoter region; forms nuclear foci upon DNA replication stress	II	4.46597	3.76553	2.848	2.45943	0.137504	0.137504	-0.152003			I	III	6	6	0	1	0	-0.135	77.7352	3.44792
YAR002C-A	ERP1	Member of the p24 family involved in ER to Golgi transport; role in misfolded protein quality control; forms heterotrimeric complex with Erp2p, Emp24p, and Erv25p; localized to COPII-coated vesicles; ERP1 has a paralog, ERP6, that arose from the whole genome duplication	II	4.26303	3.87774	3.30743	1.848	-0.321928	-1.32193	-3.32193				III	1	3	0	0	0		285.509	12.6636
YGR130C		Component of the eisosome with unknown function; GFP-fusion protein localizes to the cytoplasm; specifically phosphorylated in vitro by mammalian diphosphoinositol pentakisphosphate (IP7)	II	4.35755	2.90689	2.60881	1.76554	1.1375					II	III	10	7	0	0	1	0.195	36.3862	1.6139
YOR335C	ALA1	Cytoplasmic and mitochondrial alanyl-tRNA synthetase; required for protein synthesis; point mutation (cdc64-1 allele) causes cell cycle arrest at G1; lethality of null mutation is functionally complemented by human homolog AARS; mutations in human homolog AARS are associated with autoimmune disease polymyositis/dermatomyositis	II	5.45286	4.45286	2.60881	1.07039	0.765535	-3.32193				IV	III	6	8	1	0	2		486.189	21.5647
YFL034C-A	RPL22B	Ribosomal 60S subunit protein L22B; homologous to mammalian ribosomal protein L22, no bacterial homolog; RPL22B has a paralog, RPL22A, that arose from the whole genome duplication	II	3.76553	3.51096	3.16993	2.82782	1.20163	-2.32193	-2.32193		IV	III	III	7	3	0	1	0		129.169	5.72925
YDL227C	HO	Site-specific endonuclease; required for gene conversion at the MAT locus (homothallic switching) through the generation of a ds DNA break; expression restricted to mother cells in late G1 as controlled by Swi4p-Swi6p, Swi5p, and Ash1p	II	4.73335	4.27799	3.60881	2.29278	1.1375	-0.514573	-1.73697			III		5	2	0	1	0	-0.153	69.8576	3.09851
YBR158W	AMN1	Protein required for daughter cell separation; multiple mitotic checkpoints, and chromosome stability; contains 12 degenerate leucine-rich repeat motifs; expression is induced by the Mitotic Exit Network (MEN)	II	5.06609	4.39232	3.52356	2.26303	1.07039	0.584963	-1.32193				III	6	8	0	0	0	-0.025	239.897	10.6406
YGL122C	NAB2	Nuclear polyadenylated RNA-binding protein; required for nuclear mRNA export and poly(A) tail length control; binds nuclear pore protein Mlp1p; involved in forming export-competent mRNPs in the nucleus; autoregulates mRNA levels; related to human hnRNPs; nuclear localization sequence binds Kap104p; protein abundance increases in response to DNA replication stress	II	6.67666	6.20163	3.98185	3.3505	0.485427	-1.73697	-2.32193		IV		III	8	12	2	0	1	-0.153	79.7709	3.53821
YNL044W	YIP3	Protein localized to COPII vesicles; proposed to be involved in ER to Golgi transport; interacts with members of the Rab GTPase family and Yip1p; also interacts with Rtn1p	II	4.32912	3.82782	3.26303	2.16993	1.88752	-1	-1.73697	-3.32193	IV	II	III	5	6	0	1	0	-0.125	126.699	5.61968
YEL054C	RPL12A	Ribosomal 60S subunit protein L12A; rpl12a rpl12b double mutant exhibits slow growth and slow translation; homologous to mammalian ribosomal protein L12 and bacterial L11; RPL12A has a paralog, RPL12B, that arose from the whole genome duplication	II	5.84046	4.67807	4.00899	2.16993	0.584963	-0.514573	-1.32193		IV	III	II	9	9	1	1	0		2193.57	97.2952
YJL122W	ALB1	Shuttling pre-60S factor; involved in the biogenesis of ribosomal large subunit; interacts directly with Arx1p; responsible for Tif6p recycling defects in absence of Rei1p	II	5.59096	4.52982	4.23266	3.83794	0.847997	-0.152003			III	I	III	12	5	0	1	1	0.205	233.274	10.3468
YLR363W-A		Protein of unknown function; green fluorescent protein (GFP)-fusion protein localizes to the nucleus; relocalizes from nucleus to nucleolus upon DNA replication stress	II	4.85798	4.16993	2.7866	2.3505	0.584963	0.378512	-0.736966		IV	I	II	9	3	0	1	1	-0.392	83.6767	3.71145
YJR133W	XPT1	Xanthine-guanine phosphoribosyl transferase; required for xanthine utilization and for optimal utilization of guanine	II	4.05311	3.49825	2.88753	1.26303	0.378512	-0.152003			III	III		5	5	1	0	1	0.234	72.3348	3.20839
YDL226C	GCS1	ADP-ribosylation factor GTPase activating protein (ARF GAP); involved in ER-Golgi transport; required for prospore membrane formation; regulates phospholipase Spo14p; shares functional similarity with Glo3p; GCS1 has a paralog, SPS18, that arose from the whole genome duplication	II	5.71699	5.36457	4.37851	3.07039	-0.152003	-0.514573	-1	-3.32193			II	9	9	0	0	0	0.12	120.267	5.33442
YDR397C	NCB2	Subunit of a heterodimeric NC2 transcription regulator complex; complex binds to TBP and can repress transcription by preventing preinitiation complex assembly or stimulate activated transcription; homologous to human NC2beta; complex also includes Bur6p	II	4.70044	3.98185	3.05311	2.98185	2.60881	-3.32193						11	4	0	1	0	-0.225	87.4697	3.87969
YML081W	TDA9	Transcription factor that regulates acetate production; green fluorescent protein (GFP)-fusion protein localizes to the nucleus; null mutant is sensitive to expression of the top1-T722A allele; not an essential gene; TDA9 has a paralog, RSF2, that arose from the whole genome duplication	II	3.45943	3.20163	2.53605	2.45943	2.32193						II	7	11	0	0	1	-0.154	43.4942	1.92917
YDR165W	TRM82	Catalytic subunit of a tRNA methyltransferase complex; Trm8p and Trm82p comprise an enzyme that catalyzes a methyl-transfer from S-adenosyl-l-methionine to the N(7) atom of guanine at position 46 in tRNA; Trm8 lacks catalytic activity if not bound to Trm82p; relocalizes to the cytosol in response to hypoxia	II	4.54226	3.83794	3.12101	2.70044	2.10434	0.584963					III	10	5	0	0	0	-0.024	145.328	6.44599
YOL109W	ZEO1	Peripheral membrane protein of the plasma membrane; interacts with Mid2p; regulates the cell integrity pathway mediated by Pkc1p and Slt2p; the authentic protein is detected in a phosphorylated state in highly purified mitochondria	II	4.81762	3.81762	3.30743	2.7866	1.80736	0.137504	-2.32193					0	0	1	0	0		2214.35	98.2166
YFR013W	IOC3	Subunit of the Isw1a complex; Isw1a has nucleosome-stimulated ATPase activity and represses transcription initiation by specific positioning of a promoter proximal dinucleosome; promotes nucleosome shifts in the 5 prime direction; IOC3 has a paralog, ESC8, that arose from the whole genome duplication	II	4.80219	4.08746	3.26303	2.70044	2	-3.32193				IV	III	7	5	0	0	1	-0.391	42.7601	1.89661
YNL278W	CAF12	Part of the CCR4-NOT transcriptional regulatory complex; involved in controlling mRNA initiation, elongation, and degradation; CAF120 has a paralog, SKG3, that arose from the whole genome duplication	II	4.48543	4.15381	3.60881	2.74416	2.65535	1.20163	-3.32193				III	9	11	0	0	2	-1.291	12.4366	0.551621
YDR304C	CPR5	Peptidyl-prolyl cis-trans isomerase (cyclophilin) of the ER; catalyzes the cis-trans isomerization of peptide bonds N-terminal to proline residues; transcriptionally induced in response to unfolded proteins in the ER; CPR5 has a paralog, CPR2, that arose from the whole genome duplication	II	3.9542	3.32193	2.72247	1.48543	0.678072	-1	-3.32193				III	2	8	1	0	1		313.922	13.9239
YGL213C	SKI8	Ski complex component and WD-repeat protein; mediates 3'-5' RNA degradation by the cytoplasmic exosome; also required for meiotic double-strand break recombination; null mutants have superkiller phenotype	II	4.20945	3.54844	3.12101	2.76553	0.378512	0.378512					III	4	9	0	0	1	0.464	68.0126	3.01668
YBL028C		Protein of unknown function that may interact with ribosomes; green fluorescent protein (GFP)-fusion protein localizes to the nucleolus; predicted to be involved in ribosome biogenesis	II	5.18587	4.1127	3.1375	2.43296	1.63227	0.137504	-3.32193			II		8	4	0	1	0	-0.336	236.1	10.4721
YJL168C	SET2	Histone methyltransferase with a role in transcriptional elongation; methylates H3 lysine 36 (H3K36), which suppresses incorporation of acetylated histones and signals for the deacetylation of these histones within transcribed genes; associates with the C-terminal domain(CTD) of Rpo21p; H3K36me3 (trimethylation) requires Spt6p, proline 38 on H3, CTD of Rpo21p, Ctk1p, and C-terminal SRI domain of …	II	4.83794	4.24793	3.848	3.51096	0.263034	-1	-1.32193				III	8	10	0	1	0	0.022	35.2014	1.56135
YBL021C	HAP3	Subunit of the Hap2p/3p/4p/5p CCAAT-binding complex; complex is heme-activated and glucose-repressed; complex is a transcriptional activator and global regulator of respiratory gene expression; contains sequences contributing to both complex assembly and DNA binding	II	6.16189	5.84046	4.93074	2.72247	-2.32193				IV		II	10	8	1	0	0	-0.771	20.2658	0.898885
YLR200W	YKE2	Subunit of the heterohexameric Gim/prefoldin protein complex; involved in the folding of alpha-tubulin, beta-tubulin, and actin; prefoldin complex also localizes to chromatin of actively transcribed genes in the nucleus and facilitates transcriptional elongation	II	3.81762	3.44626	2.76553	1.07039	0.925999							6	7	0	2	0	-0.179	109.012	4.83518
YMR109W	MYO5	One of two type I myosin motors; contains proline-rich tail homology 2 (TH2) and SH3 domains; MYO5 deletion has little effect on growth, but myo3 myo5 double deletion causes severe defects in growth and actin cytoskeleton organization; MYO5 has a paralog, MYO3, that arose from the whole genome duplication	II	4.01792	3.16993	2.96347	1.88752	1.43296	0.765535					III	11	2	2	0	0	-0.261	60.4537	2.6814
YMR194W	RPL36A	Ribosomal 60S subunit protein L36A; N-terminally acetylated; binds to 5.8 S rRNA; homologous to mammalian ribosomal protein L36, no bacterial homolog; RPL36A has a paralog, RPL36B, that arose from the whole genome duplication	II	5.03122	4.1127	3.08746	2.37851	1.58496	0.137504	-1			IV	II	8	3	0	1	0		426.761	18.9289
YOR248W		Dubious open reading frame; unlikely to encode a functional protein, based on available experimental and comparative sequence data	II	5.82528	4.91169	3.82782	1.80736	1.26303	-0.514573	-3.32193				II	#N/A	#N/A	0	0	1		0.501753	0.0222551
YLR448W	RPL6B	Ribosomal 60S subunit protein L6B; binds 5.8S rRNA; homologous to mammalian ribosomal protein L6, no bacterial homolog; RPL6B has a paralog, RPL6A, that arose from the whole genome duplication	II	4.32912	3.39232	2.45943	1.80736	0.678072	-0.321928	-3.32193				III	6	4	1	1	1		1166.52	51.7408
YOL059W	GPD2	NAD-dependent glycerol 3-phosphate dehydrogenase; expression is controlled by an oxygen-independent signaling pathway required to regulate metabolism under anoxic conditions; located in cytosol and mitochondria; constitutively active but is inactivated via phosphorylation by energy-stress responsive kinase SNF1; GPD2 has a paralog, GPD1, that arose from the whole genome duplication	II	6.00225	5.19771	4.14568	3.33628	2.32193	0.137504	-2.32193		III	I	II	11	4	0	1	0		123.067	5.45859
YAL032C	PRP45	Protein required for pre-mRNA splicing; associates with the spliceosome and interacts with splicing factors Prp22p and Prp46p; orthologous to human transcriptional coactivator SKIP and can activate transcription of a reporter gene	II	4.54226	3.63227	3.15381	2.63227	1.88752	0.263034	-0.321928					8	5	0	1	1	-0.291	22.4273	0.994756
YDR063W	AIM7	Protein that interacts with Arp2/3 complex; interacts with Arp2/3 complex to stimulate actin filament debranching and inhibit actin nucleation; has similarity to Cof1p and also to human glia maturation factor (GMF); null mutant displays elevated mitochondrial genome loss	II	3.85798	3.44626	3.05311	2.20163	2.10434	0.378512	-3.32193				IV	4	3	0	1	0	-0.176	89.6759	3.97754
YBL042C	FUI1	High affinity uridine permease, localizes to the plasma membrane; also mediates low but significant transport of the cytotoxic nucleoside analog 5-fluorouridine; not involved in uracil transport; relative distribution to the vacuole increases upon DNA replication stress	II	5.24031	3.76553	2.90689	2.20163	1.1375	0.263034	-3.32193	-3.32193			III	5	3	0	0	1	0.086	76.9052	3.4111
YOR323C	PRO2	Gamma-glutamyl phosphate reductase; catalyzes the second step in proline biosynthesis	II	5.78921	4.30743	3.21723	2.48543	2.20163	0.584963	-2.32193		IV	III	II	5	5	0	0	1	0.216	242.153	10.7406
YOL068C	HST1	NAD(+)-dependent histone deacetylase; essential subunit of the Sum1p/Rfm1p/Hst1p complex required for ORC-dependent silencing and mitotic repression; non-essential subunit of the Set3C deacetylase complex; involved in telomere maintenance; HST1 has a paralog, SIR2, that arose from the whole genome duplication	II	4.38543	3.75489	3.16993	2.7866	1.32193	1.20163	-0.736966	-3.32193			III	5	2	1	0	0	-0.196	64.316	2.85271
YIL051C	MMF1	Mitochondrial protein required for transamination of isoleucine; but not of valine or leucine; may regulate specificity of branched-chain transaminases Bat1p and Bat2p; induction of expression in response to stress is mediated by a Hog1p-regulated antisense RNA and gene looping; interacts genetically with mitochondrial ribosomal protein genes; MMF1 has a paralog, HMF1, that arose from the whole g…	II	5.20945	4.19377	3.49825	2.3505	1	-0.152003	-1.73697		III	II	III	6	4	0	0	1		933.849	41.4206
YIR005W	IST3	Component of the U2 snRNP; required for the first catalytic step of splicing and for spliceosomal assembly; interacts with Rds3p and is required for Mer1p-activated splicing; diploid mutants have a specific defect in MATa1 pre-mRNA splicing which leads to haploid gene expression in diploids	II	3.87774	3.29278	2.8679	2.37851	-0.321928	-1.73697	-2.32193					7	9	0	0	1	-0.047	17.8261	0.790673
YPL131W	RPL5	Ribosomal 60S subunit protein L5; homologous to mammalian ribosomal protein L5 and bacterial L18; binds 5S rRNA and is required for 60S subunit assembly	II	4.97728	4.07895	3.52356	2.16993	1.07039						II	6	7	0	0	0		4759.38	211.101
YEL032W	MCM3	Protein involved in DNA replication; component of the Mcm2-7 hexameric helicase complex that binds chromatin as a part of the pre-replicative complex	II	5.56986	3.9542	2.8679	2.60881	1.848	-0.321928	-1				III	9	7	0	0	0	-0.285	63.1082	2.79914
YLR425W	TUS1	Guanine nucleotide exchange factor (GEF) that modulate Rho1p activity; involved in the cell integrity signaling pathway; interacts with Rgl1p; localization of Tus1p to the bed neck is regulated by Rgl1p; multicopy suppressor of tor2 mutation and ypk1 ypk2 double mutation; potential Cdc28p substrate	II	3.65535	3.21723	2.20163	1.67807	0.765535	0.485427	-3.32193				III	4	9	0	0	1	-0.356	12.5082	0.554799
YPL129W	TAF14	Subunit of TFIID, TFIIF, INO80, SWI/SNF, and NuA3 complexes; involved in RNA polymerase II transcription initiation and in chromatin modification; contains a YEATS domain	II	3.70044	2.58496	2.53605	2.51096	1.37851	1.20163	-3.32193	-3.32193			III	6	5	0	0	1	0.18	92.3525	4.09627
YIL127C	RRT14	Putative protein of unknown function; identified in a screen for mutants with decreased levels of rDNA transcription; green fluorescent protein (GFP)-fusion protein localizes to the nucleolus; predicted to be involved in ribosome biogenesis	II	5.3505	4.34341	3.52356	2.65535	1	0.263034	-1.32193			III	II	7	4	0	1	0	-0.466	85.5724	3.79554
YBR009C	HHF1	Histone H4; core histone protein required for chromatin assembly and chromosome function; one of two identical histone proteins (see also HHF2); contributes to telomeric silencing; N-terminal domain involved in maintaining genomic integrity	II	4.89724	4.41954	3.60881	2.67807	1.67807	-0.736966	-1			III	II	15	11	0	2	1		847.622	37.596
YMR142C	RPL13B	Ribosomal 60S subunit protein L13B; not essential for viability; homologous to mammalian ribosomal protein L13, no bacterial homolog; RPL13B has a paralog, RPL13A, that arose from the whole genome duplication	II	4.87283	3.66676	2.926	2.51096	2.03562					III		8	5	0	0	0		1738.19	77.0967
YLR405W	DUS4	Dihydrouridine synthase; member of a widespread family of conserved proteins including Smm1p, Dus1p, and Dus3p	II	4.96809	3.97269	3.7866	2.45943	2.10434	0.765535	-3.32193	-3.32193			III	10	5	1	0	1	-0.076	29.2342	1.29667
YER074W	RPS24A	Protein component of the small (40S) ribosomal subunit; homologous to mammalian ribosomal protein S24, no bacterial homolog; RPS24A has a paralog, RPS24B, that arose from the whole genome duplication	II	5.48543	4.49185	3.74416	2.3505	1.32193	-0.152003	-1	-3.32193				8	5	0	0	0		798.123	35.4005
YGL070C	RPB9	RNA polymerase II subunit B12.6; contacts DNA; mutations affect transcription start site selection and fidelity of transcription	II	4.55459	4.04439	3.66676	2.70044	1.67807	0.485427	-3.32193	-2.32193		II	III	13	5	0	2	0	-0.167	89.8106	3.98352
YNL131W	TOM22	Component of the TOM (Translocase of Outer Membrane) complex; responsible for initial import of mitochondrially directed proteins; mediates interaction between TOM and TIM complexes and acts as a receptor for precursor proteins	II	4.64961	3.52356	2.82782	2.29278	1.48543	-1.32193	-1.32193		I		II	4	4	1	0	0	0.126	280.284	12.4319
YER117W	RPL23B	Ribosomal 60S subunit protein L23B; homologous to mammalian ribosomal protein L23 and bacterial L14; RPL23B has a paralog, RPL23A, that arose from the whole genome duplication	II	5.62644	4.62059	3.44626	2.29278	1	-0.736966	-2.32193			IV	II	4	10	0	0	0		864.901	38.3624
YDL075W	RPL31A	Ribosomal 60S subunit protein L31A; associates with karyopherin Sxm1p; loss of both Rpl31p and Rpl39p confers lethality; homologous to mammalian ribosomal protein L31, no bacterial homolog; RPL31A has a paralog, RPL31B, that arose from the whole genome duplication	II	5.59694	4.51728	3.67807	1.67807	0.137504	-1	-2.32193		III	IV	III	11	5	0	0	0		1498.37	66.4597
YER165W	PAB1	Poly(A) binding protein; part of the 3'-end RNA-processing complex, mediates interactions between the 5' cap structure and the 3' mRNA poly(A) tail, involved in control of poly(A) tail length, interacts with translation factor eIF-4G; stimulates, but is not required for the deadenylation activity of the Pan2p-Pan3p poly(A)-ribonuclease complex	II	3.82782	3.05311	2.16993	1.72247	0.925999	-1.32193	-2.32193			III	III	9	5	0	1	0		1025.6	45.4903
YBR278W	DPB3	Third-largest subunit of DNA polymerase II (DNA polymerase epsilon); required to maintain fidelity of chromosomal replication and also for inheritance of telomeric silencing; stabilizes the interaction of Pol epsilon with primer-template DNA, positively affecting the processivity of the polymerase and exonuclease activities of Pol epsilon; mRNA abundance peaks at the G1/S boundary of the cell cyc…	II	3.7761	3.66676	3.07039	2.23266	2.10434	-1	-1			III		3	4	1	0	0	-0.003	23.8234	1.05668
YAL013W	DEP1	Component of the Rpd3L histone deacetylase complex; required for diauxic shift-induced histone H2B deposition onto rDNA genes; transcriptional modulator involved in regulation of structural phospholipid biosynthesis genes and metabolically unrelated genes, as well as maintenance of telomeres, mating efficiency, and sporulation	II	4.08746	3.9542										4	6	0	0	0	-0.037	13.9278	0.617765
YMR033W	ARP9	Component of both the SWI/SNF and RSC chromatin remodeling complexes; actin-related protein involved in transcriptional regulation	II	5.3147	3.89724	2.60881	1.63227	0.925999	-0.321928		-3.32193	IV	II	II	11	7	0	1	0	0.287	60.7212	2.69327
YKL009W	MRT4	Protein involved in mRNA turnover and ribosome assembly; required at post-transcriptional step for efficient retrotransposition; localizes to the nucleolus	II	5.08746	4.34341	2.74416	2	1.53605	-0.152003	-3.32193	-3.32193		II	III	15	7	0	1	0		299.343	13.2773
YDR021W	FAL1	Nucleolar protein required for maturation of 18S rRNA; member of the eIF4A subfamily of DEAD-box ATP-dependent RNA helicases	II	3.39232	3.29278	3.27799	3	1.67807	-1.73697	-3.32193					8	6	0	0	0	0.525	41.3445	1.83382
YBR260C	RGD1	GTPase-activating protein (RhoGAP) for Rho3p and Rho4p; possibly involved in control of actin cytoskeleton organization	II	4.46597	3.85798	3.16993	2.1375	1.48543	1.26303	-1			IV	III	12	9	1	1	0	-0.097	30.3534	1.34632
YKL207W	EMC3	Member of conserved ER transmembrane complex; required for efficient folding of proteins in the ER; required for respiratory growth; null mutant displays induction of the unfolded protein response; homologous to worm Y62E10A.10/EMC-3, fly CG6750, human TMEM111	II	4.44626	3.99096	2.60881	1.20163	0.263034							1	3	0	0	0	0.263	153.271	6.79828
YML113W	DAT1	DNA binding protein that recognizes oligo(dA).oligo(dT) tracts; Arg side chain in its N-terminal pentad Gly-Arg-Lys-Pro-Gly repeat is required for DNA-binding; relocalizes to the cytosol in response to hypoxia; not essential for viability	II	5	4.20163	3.44626	1.848	0.925999	0.263034	-1			III	III	7	7	0	0	1	-0.704	34.705	1.53933
YDR336W	MRX8	Protein that associates with mitochondrial ribosome; sumoylated under stress conditions in a genome wide study; YDR336W is not an essential gene	II	4.06178	3.85798	2.43296	2.29278	-0.321928							6	5	1	0	1	0.247	24.824	1.10106
YOR294W	RRS1	Essential protein that binds ribosomal protein L11; required for nuclear export of the 60S pre-ribosomal subunit during ribosome biogenesis; localizes to the nucleolus and in foci along nuclear periphery; cooperates with Ebp2p and Mps3p to mediate telomere clustering by binding Sir4p, but is not involved in telomere tethering; mouse homolog shows altered expression in Huntington's disease model m…	II	4.26303	3.6893	3.27799	2.76553	1.80736	0.678072	-0.514573			I	II	10	1	0	1	0	0.667	277.874	12.325
YMR277W	FCP1	Carboxy-terminal domain (CTD) phosphatase; essential for dephosphorylation of the repeated C-terminal domain of the RNA polymerase II large subunit (Rpo21p); relocalizes to the cytosol in response to hypoxia	II	4.53605	4.1127	3.36457	0.925999							III	7	7	1	0	1	-0.205	56.7841	2.51864
YGL101W		Protein of unknown function; non-essential gene; interacts with the DNA helicase Hpr5p; YGL101W has a paralog, YBR242W, that arose from the whole genome duplication	II	3.7115	3.10434	2.90689	2.70044	1	-3.32193		-3.32193		IV	III	8	8	0	2	1	0.328	79.6302	3.53197
YDR415C		Putative aminopeptidase	II	4.46597	4.1127	3.65535	1.63227	1.1375	1						4	5	0	1	0	0.142	25.6745	1.13878
YPL143W	RPL33A	Ribosomal 60S subunit protein L33A; N-terminally acetylated; rpl33a null mutant exhibits slow growth while rpl33a rpl33b double null mutant is inviable; homologous to mammalian ribosomal protein L35A, no bacterial homolog; RPL33A has a paralog, RPL33B, that arose from the whole genome duplication	II	3.7761	3.26303	2.76553	1.926	0.584963	0.263034	-3.32193	-3.32193				6	8	0	0	0		1079.97	47.9018
YKL056C	TMA19	Protein that associates with ribosomes; homolog of translationally controlled tumor protein; green fluorescent protein (GFP)-fusion protein localizes to the cytoplasm and relocates to the mitochondrial outer surface upon oxidative stress	II	6.45121	5.0917	3.99096	2.70044	1.96347	-0.514573	-1.73697			IV	II	7	3	0	0	0		3453.46	153.177
YNL098C	RAS2	GTP-binding protein; regulates nitrogen starvation response, sporulation, and filamentous growth; farnesylation and palmitoylation required for activity and localization to plasma membrane; homolog of mammalian Ras proto-oncogenes; RAS2 has a paralog, RAS1, that arose from the whole genome duplication	II	4.67807	3.3505	2.72247	2.56072	1.88752	-3.32193					III	6	8	0	0	0	0.224	119.5	5.30037
YJR123W	RPS5	Protein component of the small (40S) ribosomal subunit; least basic of non-acidic ribosomal proteins; phosphorylated in vivo; essential for viability; homologous to mammalian ribosomal protein S5 and bacterial S7	II	5.27426	3.99096	2.72247	2.26303	0.925999	-0.514573	-2.32193					6	4	0	0	0		6196.27	274.833
YBL034C	STU1	Component of the mitotic spindle; binds to interpolar microtubules via its association with beta-tubulin (Tub2p); required for interpolar microtubules to provide an outward force on the spindle poles	II	3.7866	3.47249	2.80735	2.53605	0.263034	-0.152003	-2.32193				III	5	6	0	0	1	-0.251	18.8862	0.837692
YLR388W	RPS29A	Protein component of the small (40S) ribosomal subunit; homologous to mammalian ribosomal protein S29 and bacterial S14; RPS29A has a paralog, RPS29B, that arose from the whole genome duplication	II	6.00899	4.93074	3.99096	3.08746	1.80736		-3.32193			II	III	6	7	0	0	1		1995.99	88.5313
YJL145W	SFH5	Non-classical phosphatidylinositol transfer protein (PITP); exhibits PI- but not PC-transfer activity; localizes to the peripheral endoplasmic reticulum, cytosol and microsomes; similar to Sec14p; partially relocalizes to the plasma membrane upon DNA replication stress	II	5.34341	4.74953	3.82782	3.41954	1.1375	0.378512	-1.73697	-3.32193			III	5	9	0	0	0	0.008	114.784	5.09121
YMR112C	MED11	Subunit of the RNA polymerase II mediator complex; associates with core polymerase subunits to form the RNA polymerase II holoenzyme; essential protein	II	4.49825	2.67807	2.40599	2.32193							II	7	9	0	0	1	0.302	39.2664	1.74165
YPL094C	SEC62	Essential subunit of Sec63 complex; with Sec61 complex, Kar2p/BiP and Lhs1p forms a channel competent for SRP-dependent and post-translational SRP-independent protein targeting and import into the ER; cotranslationally N-acetylated by NatA; other members are Sec63p, Sec66p, and Sec72p	II	3.91648	3.70044	3.27799	2.76553	1.67807				II	IV	III	9	6	0	0	0	0.182	164.355	7.2899
YLR249W	YEF3	Translation elongation factor 3; contains two ABC cassettes; binds and hydrolyzes ATP; YEF3 has a paralog, HEF3, that arose from the whole genome duplication	II	5.76818	4.77083	3.53605	2.53605	1.37851	0.263034	-2.32193			IV	III	7	6	0	0	0		4782.61	212.131
YKL033W-A		Putative protein of unknown function; similar to uncharacterized proteins from other fungi	II	4.6837	3.87774	1.58496	1.37851	0.485427	-1.73697					III	6	8	0	1	0		199.429	8.84561
YDL014W	NOP1	Histone glutamine methyltransferase, modifies H2A at Q105 in nucleolus; component of the small subunit processome complex, which is required for processing of pre-18S rRNA; ortholog of mammalian fibrillarin	II	6.06609	4.9542	4.39917	3.29278	2.07039	-1	-2.32193			I	II	13	2	0	1	0		628.804	27.8904
YLR017W	MEU1	Methylthioadenosine phosphorylase (MTAP); catalyzes the initial step in the methionine salvage pathway; affects polyamine biosynthesis through regulation of ornithine decarboxylase (Spe1p) activity; regulates ADH2 gene expression	II	4.926	3.45943	3.01792	2.03562	1.32193	-2.32193	-3.32193	-3.32193		II	II	7	5	0	1	0	-0.087	150.332	6.66792
YPR187W	RPO26	RNA polymerase subunit ABC23; common to RNA polymerases I, II, and III; part of central core; similar to bacterial omega subunit	II	4.21723	3.65535	2.96347	2.40599	1.20163	0.485427	-3.32193		IV	I		14	8	1	1	0		282.26	12.5195
YLL011W	SOF1	Protein required for biogenesis of 40S (small) ribosomal subunit; has similarity to the beta subunit of trimeric G-proteins and the splicing factor Prp4p; essential gene	II	5.25172	4.51728	3.848	3.21723		-1.73697	-3.32193		III	I	III	8	6	1	1	0	0.221	112.164	4.975
YDR025W	RPS11A	Protein component of the small (40S) ribosomal subunit; homologous to mammalian ribosomal protein S11 and bacterial S17; N-terminally propionylated in vivo; RPS11A has a paralog, RPS11B, that arose from the whole genome duplication	III	3.72247	2.76553	1.58496	1.32193	0.378512	-1.32193	-1.32193					1	4	0	0	0		1041.79	46.2081
YDL141W	BPL1	Biotin:apoprotein ligase; covalently modifies proteins with the addition of biotin, required for acetyl-CoA carboxylase (Acc1p) holoenzyme formation; comparative analysis suggests that a mitochondrially targeted form may result from translation starting at a non-canonical codon upstream of the annotated start codon	III	3.27799	2.43296	1.72247	0.678072	0.485427	0.137504	-3.32193					3	5	0	0	0	-0.177	44.9592	1.99415
YBR145W	ADH5	Alcohol dehydrogenase isoenzyme V; involved in ethanol production; ADH5 has a paralog, ADH1, that arose from the whole genome duplication	III	2.43296	1.1375	1.1375	0.925999				-3.32193				5	3	0	0	0	0.197	14.8661	0.65938
YOR359W	VTS1	Flap-structured DNA-binding and RNA-binding protein; stimulates deadenylation-dependent mRNA degradation mediated by the CCR4-NOT deadenylase complex; member of the Smaug (Smg) family of post-transcriptional regulators which bind RNA through a conserved sterile alpha motif (SAM) domain that interacts with Smg recognition element (SREs) containing transcripts; stimulates Dna2p endonuclease activity	III	1.848	1.37851	1.37851	0.925999	0.925999	0.765535		-3.32193				6	8	1	0	3	0.24	41.0956	1.82278
YDR365C	ESF1	Nucleolar protein involved in pre-rRNA processing; depletion causes severely decreased 18S rRNA levels	III	3.48543	2.16993	2.07039	1.88752						III		7	7	0	0	1	0.401	146.357	6.4916
YGL246C	RAI1	Nuclear protein with decapping endonuclease activity; targets mRNAs with unmethylated 7-methylguanosine cap structures and 5'-triphosphates; binds to and stabilizes the exoribonuclease Rat1p; required for pre-rRNA processing; relocalizes to the cytosol in response to hypoxia; homologous to human DOM3Z	III	2.51096	2.3505	2	1.32193	0.925999			-3.32193				4	6	1	0	1	0.092	52.158	2.31345
YIR010W	DSN1	Essential component of the MIND kinetochore complex; joins kinetochore subunits contacting DNA to those contacting microtubules; phosphorylation of Dsn1p promotes interaction between outer and inner kinetochore proteins; N-terminal end interacts with monopolin subunit Csm1p and is essential for meiotic but not mitotic chromosome segregation; important for chromosome segregation; complex consists …	III	3.53605	2.88753	2.58496	2.10434	1.63227	0.765535	-1					5	12	0	0	1	0.126	22.6146	1.00306
YKL005C	BYE1	Negative regulator of transcription elongation; contains a TFIIS-like domain that associates with chromatin and a PHD domain that interacts with H3K4me3; multicopy suppressor of temperature-sensitive ess1 mutations, binds RNA polymerase II large subunit	III	3.66676	2.23266	1.20163	0.263034	0.263034							7	8	0	0	1	-0.433	21.5328	0.955079
YCL005W-A	VMA9	Vacuolar H+ ATPase subunit e of the V-ATPase V0 subcomplex; essential for vacuolar acidification; interacts with the V-ATPase assembly factor Vma21p in the ER; involved in V0 biogenesis	III	1.67807	1.26303	1.26303	0.678072	0.485427							2	0	0	0	0		149.2	6.61772
YPL118W	MRP51	Mitochondrial ribosomal protein of the small subunit; MRP51 exhibits genetic interactions with mutations in the COX2 and COX3 mRNA 5'-untranslated leader sequences	III	2.926	1.32193	0.137504	0.137504	0.137504			-3.32193	II	III	III	6	5	1	0	0	0.103	85.9629	3.81285
YDR450W	RPS18A	Protein component of the small (40S) ribosomal subunit; homologous to mammalian ribosomal protein S18 and bacterial S13; RPS18A has a paralog, RPS18B, that arose from the whole genome duplication; protein increases in abundance and relocalizes from cytoplasm to nuclear foci upon DNA replication stress	III	3.44626	2.32193	1.63227	1.26303	0.847997	-1.32193	-3.32193				III	6	11	0	0	0		1592.33	70.6272
YFL034W		Putative integral membrane protein that interacts with Rpp0p; Rpp0p is a component of the ribosomal stalk	III	2.74416	2.48543	2.23266	1.926	1.20163	0.765535	0.378512					5	6	0	0	1	-0.182	22.9445	1.0177
YDL174C	DLD1	D-lactate dehydrogenase; oxidizes D-lactate to pyruvate, transcription is heme-dependent, repressed by glucose, and derepressed in ethanol or lactate; located in the mitochondrial inner membrane	III	2.98185	2.32193	0.378512	-0.152003	-1	-1	-1	-3.32193			IV	4	4	0	1	0	0.079	33.1209	1.46907
YHR120W	MSH1	DNA-binding protein of the mitochondria; involved in repair of mitochondrial DNA; has ATPase activity and binds to DNA mismatches; has homology to E. coli MutS; transcription is induced during meiosis	III	3.30743	2.3505	1.848	1.76554	1.1375		-1.32193			IV		8	7	1	1	0	-0.551	20.7838	0.92186
YKR059W	TIF1	Translation initiation factor eIF4A; DEA(D/H)-box RNA helicase that couples ATPase activity to RNA binding and unwinding; forms a dumbbell structure of two compact domains connected by a linker; interacts with eIF4G; protein abundance increases in response to DNA replication stress; TIF1 has a paralog, TIF2, that arose from the whole genome duplication	III	4.15381	2.72247	1.67807	0.925999	0.584963	-0.736966	-2.32193	-2.32193			III	5	5	2	0	0		291.514	12.93
YIL132C	CSM2	Component of Shu complex (aka PCSS complex); Shu complex also includes Psy3, Shu1, Shu2, and promotes error-free DNA repair,; Shu complex mediates inhibition of Srs2p function; promotes formation of Rad51p filaments; Psy3p and Csm2p contain similar DNA-binding regions which work together to form a single DNA binding site; required for accurate chromosome segregation during meiosis	III	2.80735	1.80736	1.72247	1.72247	1.72247	1.32193	-3.32193					1	3	0	0	1	-0.004	7.26187	0.322098
YDR476C		Putative protein of unknown function; green fluorescent protein (GFP)-fusion protein localizes to the endoplasmic reticulum; YDR476C is not an essential gene	III	1.88752	1.848	1.43296	1.43296	1			-3.32193				2	8	0	0	0	-0.02	32.4256	1.43822
YOR295W	UAF3	Subunit of UAF (upstream activation factor) complex; UAF is an RNA polymerase I specific transcription stimulatory factor composed of Uaf30p, Rrn5p, Rrn9p, Rrn10p, histones H3 and H4; targeting factor for the UAF that facilitates activation of many rDNA genes; deletion decreases cellular growth rate; UAF30 has a paralog, TRI1, that arose from the whole genome duplication	III	2.63227	1.58496	1.58496	0.765535	-0.736966	-0.736966	-0.736966					4	8	1	0	1	-0.164	19.5346	0.866449
YLR457C	NBP1	Spindle pole body (SPB) component; required for the insertion of the duplication plaque into the nuclear membrane during SPB duplication; essential for bipolar spindle formation; component of the Mps2p-Bbp1p complex; NBP1 has a paralog, YPR174C, that arose from the whole genome duplication	III	2.40599	2.07039										2	6	0	0	0	-0.209	8.1309	0.360644
YAR008W	SEN34	Subunit of the tRNA splicing endonuclease; tRNA splicing endonuclease (Sen complex) is composed of Sen2p, Sen15p, Sen34p, and Sen54p; Sen complex also cleaves the CBP1 mRNA at the mitochondrial surface; Sen34p contains the active site for tRNA 3' splice site cleavage and has similarity to Sen2p and to Archaeal tRNA splicing endonuclease	III	2.26303	2.26303	1.926	1	0.678072			-3.32193				6	6	1	0	2	-0.255	17.9512	0.796222
YBL007C	SLA1	Cytoskeletal protein binding protein; required for assembly of the cortical actin cytoskeleton; interacts with proteins regulating actin dynamics and proteins required for endocytosis; found in the nucleus and cell cortex; has 3 SH3 domains	III	3.39232	1.80736	0.263034	0.263034	-0.321928	-0.514573				III	IV	12	11	0	2	0	-0.18	140.985	6.25334
YHR001W	OSH7	Oxysterol-binding protein; part of family with seven members in S. cerevisiae; family members have overlapping, redundant functions in sterol metabolism and collectively perform a function essential for viability; OSH7 has a paralog, OSH6, that arose from the whole genome duplication	III	3.26303	3.07039	1.848	1.67807	1.1375	1.1375	1.1375			III	III	8	4	0	1	0	0.56	43.2715	1.91929
YNL152W	INN1	Essential protein that associates with contractile actomyosin ring; required for ingression of the plasma membrane into the bud neck during cytokinesis; C2 domain, a membrane targeting module, is required for function; activates chitin synthase activity of Chs2p during cytokinesis	III	2.94486	2.56072	2.3505	1.53605	1.07039	0.137504	-1	-3.32193				4	8	0	0	2	-0.019	26.0352	1.15478
YJR011C		Putative protein of unknown function; GFP-fusion protein expression is induced in response to the DNA-damaging agent MMS	III	3.10434	2.45943	1.26303	0.925999								4	3	0	1	0	-0.178	16.4073	0.727741
YHR047C	AAP1	Arginine/alanine amino peptidase; overproduction stimulates glycogen accumulation; AAP1 has a paralog, APE2, that arose from the whole genome duplication	III	2.76553	2.32193	0.263034	0.263034	0.263034				III			7	7	1	0	0	0.131	151.715	6.72927
YMR011W	HXT2	High-affinity glucose transporter of the major facilitator superfamily; expression is induced by low levels of glucose and repressed by high levels of glucose	III	3.49825	2.3505	1.80736	1.63227	0.263034	-0.736966	-1.32193					5	4	0	0	0	-0.034	395.369	17.5365
YGL041W-A		Putative protein of unknown function; conserved in fungi; identified by expression profiling and mass spectrometry	III	4.04439	3.62059	2.29278	2.03562	-0.321928	-0.321928	-1.73697		IV		III	2	1	0	0	1		59.0502	2.61915
YGL133W	ITC1	Subunit of ATP-dependent Isw2p-Itc1p chromatin remodeling complex; required for repression of a-specific genes, repression of early meiotic genes during mitotic growth, and repression of INO1; similar to mammalian Acf1p, the regulatory subunit of the mammalian ATP-utilizing chromatin assembly and modifying factor (ACF) complex; ITC1 has a paralog, YPL216W, that arose from the whole genome duplica…	III	2.03562	2.03562	1.72247	0.765535				-3.32193		IV		11	13	0	0	0	-0.399	15.677	0.69535
YOL052C	SPE2	S-adenosylmethionine decarboxylase; required for the biosynthesis of spermidine and spermine; cells lacking Spe2p require spermine or spermidine for growth in the presence of oxygen but not when grown anaerobically	III	2.53605	2	1.32193	1.26303	1.20163	1.07039	-3.32193		IV	IV		6	7	1	1	1	0.215	60.6599	2.69055
YOL021C	DIS3	Exosome core complex catalytic subunit; has both endonuclease and 3'-5' exonuclease activity; involved in 3'-5' RNA processing and degradation in both the nucleus and the cytoplasm; role in degradation of tRNAs; has similarity to E. coli RNase R and to human DIS3; mutations in Dis3p corresponding to human mutations implicated in multiple myeloma cause phenotypes suggesting impaired exosome functi…	III	3.41954	2.76553	2.20163	1.926					III	I	II	14	3	0	1	0	0.005	84.3615	3.74183
YIL084C	SDS3	Component of the Rpd3L histone deacetylase complex; required for its structural integrity and catalytic activity, involved in transcriptional silencing and required for sporulation; relocalizes to the cytosol in response to hypoxia; cells defective in SDS3 display pleiotropic phenotypes	III	2.58496	1.43296	1.43296	1.43296	1.43296	1.32193	-3.32193					8	11	0	1	0		24.349	1.07999
YOR276W	CAF2	Phosphoprotein of the mRNA cap-binding complex; involved in translational control; repressor of cap-dependent translation initiation; competes with eIF4G for binding to eIF4E	III	3.70044	2.3505	1.53605	0.765535	0.378512	0.378512	-3.32193					3	8	0	0	0		525.923	23.3271
YNL010W		Putative protein of unknown function; similar to phosphoserine phosphatases; green fluorescent protein (GFP)-fusion protein localizes to the cytoplasm and nucleus; homozygous diploid mutant shows an increase in glycogen accumulation	III	3.65535	2.58496	1.80736	1.20163	1.07039			-2.32193	IV			6	10	0	0	0		406.582	18.0338
YHR036W	BRL1	Essential nuclear envelope integral membrane protein; identified as a suppressor of a conditional mutation in the major karyopherin, CRM1; homologous to and interacts with Brr6p, a nuclear envelope protein involved in nuclear export	III	2.848	2.37851	1.80736	0.485427	0.263034	-1.73697	-1.73697	-3.32193				3	4	0	0	1	-0.379	18.5427	0.822455
YGR027C	RPS25A	Protein component of the small (40S) ribosomal subunit; homologous to mammalian ribosomal protein S25, no bacterial homolog; RPS25A has a paralog, RPS25B, that arose from the whole genome duplication	III	3.83794	3	2.29278	1.80736	1.58496	0.925999	-0.514573	-3.32193				6	7	0	0	0		3552.64	157.576
YGR209C	TRX2	Cytoplasmic thioredoxin isoenzyme; part of thioredoxin system which protects cells against oxidative and reductive stress; forms LMA1 complex with Pbi2p; acts as a cofactor for Tsa1p; required for ER-Golgi transport and vacuole inheritance; with Trx1p, facilitates mitochondrial import of small Tims Tim9p, Tim10p, Tim13p by maintaining them in reduced form; abundance increases under DNA replicatio…	III	3	2.43296	2.07039	1.848	1.76554	1.1375	-3.32193	-3.32193		III		8	7	0	0	0		687.358	30.4876
YJL134W	LCB3	Long-chain base-1-phosphate phosphatase; specific for dihydrosphingosine-1-phosphate, regulates ceramide and long-chain base phosphates levels, involved in incorporation of exogenous long chain bases in sphingolipids; LCB3 has a paralog, YSR3, that arose from the whole genome duplication	III	2.29278	1.1375	1	1	0.925999						IV	6	4	0	0	0	-0.065	43.1103	1.91214
YBL099W	ATP1	Alpha subunit of the F1 sector of mitochondrial F1F0 ATP synthase; which is a large, evolutionarily conserved enzyme complex required for ATP synthesis; F1 translationally regulates ATP6 and ATP8 expression to achieve a balanced output of ATP synthase genes encoded in nucleus and mitochondria; phosphorylated; N-terminally propionylated in vivo	III	3.08746	1.72247	1.48543	0.678072	0.485427			-2.32193	III			5	5	1	0	1		228.492	10.1347
YOR247W	SRL1	Mannoprotein that exhibits a tight association with the cell wall; required for cell wall stability in the absence of GPI-anchored mannoproteins; has a high serine-threonine content; expression is induced in cell wall mutants; SRL1 has a paralog, SVS1, that arose from the whole genome duplication	III	3.07039	1.32193	0.584963	0.137504	-0.152003	-0.736966					III	4	4	0	0	1		109.35	4.85017
YDR440W	DOT1	Nucleosomal histone H3-Lys79 methylase; methylation is required for telomeric silencing, meiotic checkpoint control, and DNA damage response	III	4.97728	3	2.03562	1.32193	0.765535	-1	-1	-3.32193			III	11	5	0	1	0	-0.03	25.0453	1.11088
YJL104W	PAM16	Subunit of the import motor (PAM complex); the PAM complex is a component of the Translocase of the Inner Mitochondrial membrane (TIM23 complex); forms a 1:1 subcomplex with Pam18p and inhibits its cochaperone activity; contains a J-like domain	III	2.45943	2.40599	1.80736						II			6	2	1	0	0	-0.06	81.0308	3.59409
YKL196C	YKT6	Vesicle membrane protein (v-SNARE) with acyltransferase activity; involved in trafficking to and within the Golgi, endocytic trafficking to the vacuole, and vacuolar fusion; membrane localization due to prenylation at the carboxy-terminus	III	2.51096	2.20163	1.58496	1.43296	-0.152003	-1				III		6	3	0	1	0		211.295	9.3719
YGR251W	NOP19	Ribosome biogenesis factor; nucleolar protein associated with pre-rRNA components of the 90S preribosome, required for cleavage of pre-rRNA at A0, A1 and A2 sites; interacts with RNA helicase Dhr2p and RNA helicase-like protein Utp25p; required for incorporation of Utp25p into preribosomes	III	2.76553	2.67807	1.07039	0.925999								3	4	0	0	1	-0.065	40.796	1.80949
YOL116W	MSN1	Transcriptional activator; involved in regulation of invertase and glucoamylase expression, invasive growth and pseudohyphal differentiation, iron uptake, chromium accumulation, and response to osmotic stress; localizes to the nucleus; relative distribution to the nucleus increases upon DNA replication stress	III	3.44626	3.21723	2.43296	1.43296	0.925999	0.263034						2	10	0	1	1	-0.016	23.8199	1.05652
YDR155C	CPR1	Cytoplasmic peptidyl-prolyl cis-trans isomerase (cyclophilin); catalyzes the cis-trans isomerization of peptide bonds N-terminal to proline residues; binds the drug cyclosporin A; N-terminally propionylated in vivo; protein abundance increases in response to DNA replication stress	III	4.07895	2.03562	0.765535	0.485427	0.263034	0.263034	-3.32193		III	III		3	6	0	0	0		935.756	41.5051
YGR285C	ZUO1	Ribosome-associated chaperone; zuotin functions in ribosome biogenesis and, in partnership with Ssz1p and SSb1/2, as a chaperone for nascent polypeptide chains; contains a DnaJ domain and functions as a J-protein partner for Ssb1p and Ssb2p	III	3.83794	2.56072	2.3505	2.32193	1.1375			-3.32193	III	IV		6	3	0	0	0		790.905	35.0803
YLR033W	RSC58	Component of the RSC chromatin remodeling complex; RSC functions in transcriptional regulation and elongation, chromosome stability, and establishing sister chromatid cohesion; involved in telomere maintenance	III	4.16993	3.29278	2	1.76554	1.72247	1.67807	1.32193				III	7	9	0	0	0	-0.381	44.4701	1.97245
YOL137W	BSC6	Protein of unknown function with 8 putative transmembrane segments; ORF exhibits genomic organization compatible with a translational readthrough-dependent mode of expression	III	2.20163	1.07039	1	0.925999	-0.152003			-3.32193				6	6	1	0	0	0.362	25.3429	1.12408
YGR116W	SPT6	Nucleosome remodeling protein; functions in various aspects of transcription, chromatin maintenance, and RNA processing; required for the maintenance of chromatin structure during transcription in order to inhibit transcription from promoters within the coding region; required for H3K36 trimethylation but not dimethylation by Set2p	III	3.07039	1.48543	1.48543	1.43296	0.485427	0.485427				II		14	9	0	1	0	0.105	149.15	6.61549
YER038C	KRE29	Subunit of the SMC5-SMC6 complex; this complex is involved in removal of X-shaped DNA structures that arise between sister chromatids during DNA replication and repair; heterozygous mutant shows haploinsufficiency in K1 killer toxin resistance	III	2.10434	1.43296	1.43296	1.37851	1	1			IV	IV		2	2	0	1	0		11.0839	0.491623
YJL184W	GON7	Component of the EKC/KEOPS protein complex; EKC/KEOPS complex is required for t6A tRNA modification and telomeric TG1-3 recombination; may have role in transcription; implicated in osmotic stress response; other complex members are Kae1p, Cgi121p, Pcc1p, and Bud32p	III	1.20163	1.1375	1.1375	1.07039					III			4	9	1	0	0	-0.45	62.106	2.75469
YGL220W	FRA2	Protein involved in negative regulation of iron regulon transcription; forms an iron independent complex with Fra2p, Grx3p, and Grx4p; null mutant fails to repress iron regulon and is sensitive to nickel	III	2.80735	2	1.07039	0.765535	0.678072							7	5	1	1	0	-0.122	112.399	4.98542
YBR218C	PYC2	Pyruvate carboxylase isoform; cytoplasmic enzyme that converts pyruvate to oxaloacetate; differentially regulated than isoform Pyc1p; mutations in the human homolog are associated with lactic acidosis; PYC2 has a paralog, PYC1, that arose from the whole genome duplication	III	3.16993	1.53605	0.847997	0.765535								9	4	0	1	1	0.01	119.032	5.27963
YJR086W	STE18	G protein gamma subunit; forms a dimer with Ste4p to activate the mating signaling pathway, forms a heterotrimer with Gpa1p and Ste4p to dampen signaling; C-terminus is palmitoylated and farnesylated, which are required for normal signaling	III	3.97269	2.72247	2.56072	1.80736	-0.321928	-1					II	5	4	0	0	0	1.135	60.2072	2.67047
YBR080C	SEC18	AAA ATPase and SNARE disassembly chaperone; required for vesicular transport between ER and Golgi, the 'priming' step in homotypic vacuole fusion, autophagy, and protein secretion; releases Sec17p from SNAP complexes; has similarity to mammalian N-ethylmaleimide-sensitive factor (NSF)	III	2.1375	2.1375	2.1375	2.1375	0.925999							6	4	0	0	1	0.1	70.7148	3.13653
YKL081W	TEF4	Gamma subunit of translational elongation factor eEF1B; stimulates the binding of aminoacyl-tRNA (AA-tRNA) to ribosomes by releasing eEF1A (Tef1p/Tef2p) from the ribosomal complex	III	4.12928	3.3505	2.37851	1.48543	1	-0.152003	-1.73697	-3.32193			III	6	8	0	0	0		1450.69	64.3448
YDR385W	EFT2	Elongation factor 2 (EF-2), also encoded by EFT1; catalyzes ribosomal translocation during protein synthesis; contains diphthamide, the unique posttranslationally modified histidine residue specifically ADP-ribosylated by diphtheria toxin; EFT2 has a paralog, EFT1, that arose from the whole genome duplication	III	2.88753	1.926	1	0.678072	0.584963	-0.514573				II		9	8	0	1	0		82.5943	3.66344
YGL014W	PUF4	Member of the PUF protein family; PUF family is defined by the presence of Pumilio homology domains that confer RNA binding activity; preferentially binds mRNAs encoding nucleolar ribosomal RNA-processing factors	III	2.926	2.23266	2.07039	0.678072	-0.321928						II	13	6	0	1	0	-0.234	86.9588	3.85703
YDL135C	RDI1	Rho GDP dissociation inhibitor; involved in the localization and regulation of Cdc42p and Rho1p; protein abundance increases in response to DNA replication stress	III	3.56072	2.26303	1.96347	1.72247	1.67807	0.925999	0.765535					1	5	0	0	0	0.102	124.672	5.52978
YOR016C	ERP4	Member of the p24 family involved in ER to Golgi transport; similar to Emp24p and Erv25p; ERP4 has a paralog, ERP2, that arose from the whole genome duplication	III	1.53605	0.925999	0.847997	0.847997	0.485427	0.378512		-2.32193				4	2	0	0	0	0.408	89.2083	3.95681
YLR244C	MAP1	Methionine aminopeptidase; catalyzes the cotranslational removal of N-terminal methionine from nascent polypeptides; function is partially redundant with that of Map2p	III	3.57289	2.74416	2.67807	0.765535	-0.736966	-1.32193	-1.32193		II	III		4	3	0	0	0		356.026	15.7914
YNL330C	RPD3	Histone deacetylase, component of both the Rpd3S and Rpd3L complexes; regulates transcription, silencing, autophagy and other processes by influencing chromatin remodeling; forms at least two different complexes which have distinct functions and members; Rpd3(L) recruitment to the subtelomeric region is regulated by interaction with the arginine methyltransferase, Hmt1p	III	2.74416	1.76554	0.584963	0.137504	0.137504							11	7	1	0	1	-0.104	59.0007	2.61696
YNL055C	POR1	Mitochondrial porin (voltage-dependent anion channel); outer membrane protein required for maintenance of mitochondrial osmotic stability and mitochondrial membrane permeability; couples the glutathione pools of the intermembrane space (IMS) and the cytosol; interacts with Om45 and Om14 in the outer membrane; phosphorylated; protein abundance increases in response to DNA replication stress	III	3.59694	2.37851	1.63227	1.07039	0.847997	0.137504	-1.32193				III	6	8	0	0	0		604.002	26.7903
YKR051W		Putative protein of unknown function	III	1.926	1.926	1.58496	1.53605	1.07039							4	6	0	0	0	0.343	22.0288	0.97708
YGR235C	MIC26	Component of the MICOS complex; MICOS (formerly MINOS or MitOS) is a mitochondrial inner membrane complex that extends into the intermembrane space and has a role in the maintenance of crista junctions, inner membrane architecture, and formation of contact sites to the outer membrane; Mic26p is a non-essential component of the complex	III	1.53605	0.485427	0.485427	0.485427	0.137504	0.137504		-3.32193	IV			4	2	0	0	0	0.38	53.478	2.372
YJL196C	ELO1	Elongase I, medium-chain acyl elongase; catalyzes carboxy-terminal elongation of unsaturated C12-C16 fatty acyl-CoAs to C16-C18 fatty acids; ELO1 has a paralog, ELO2, that arose from the whole genome duplication	III	2.07039	1.67807	1.20163	1	-0.321928	-0.514573		-3.32193			IV	6	6	0	0	1	0.332	105.44	4.67677
YBR061C	TRM7	2'-O-ribose methyltransferase; methylates the 2'-O-ribose of tRNA-Phe, tRNA-Trp, and tRNA-Leu at positions C32 and N34 of tRNA anticodon loop; crucial biological role likely modification of tRNA-Phe; interacts with Trm732p and Rtt10p in 2'-O-methylation of C32 and N34 substrate tRNAs, respectively; yeast null mutant can be functionally complemented by human FTSJ1, mutations in which have been imp…	III	3.70044	3.01792	2.80735	1.43296	0.485427	-1				II		10	6	0	1	0	0.016	72.7817	3.22821
YDR121W	DPB4	Subunit of DNA pol epsilon and of ISW2 chromatin accessibility complex; involved in both chromosomal DNA replication and inheritance of telomeric silencing; stabilizes the interaction of Pol epsilon with primer-template DNA, positively affecting the processivity of the polymerase and exonuclease activities of Pol epsilon; interacts with extranucleosomal DNA and acts as anchor point for ISW2 compl…	III	2.63227	2.56072	2.20163									7	5	0	0	0	0.074	51.039	2.26382
YJR083C	ACF4	Protein of unknown function; computational analysis of large-scale protein-protein interaction data suggests a possible role in actin cytoskeleton organization; potential Cdc28p substrate	III	3.59694	1.67807	1.58496	0.925999	0.765535			-3.32193				5	3	0	0	0	0.287	17.8908	0.793539
YAL044C	GCV3	H subunit of the mitochondrial glycine decarboxylase complex; glycine decarboxylase is required for the catabolism of glycine to 5,10-methylene-THF; also required for all protein lipoylation; expression is regulated by levels of 5,10-methylene-THF	III	2.51096	2.23266	1.72247	1.48543	0.263034	-1			III	III		5	6	1	0	2		263.376	11.6819
YGL135W	RPL1B	Ribosomal 60S subunit protein L1B; N-terminally acetylated; homologous to mammalian ribosomal protein L10A and bacterial L1; RPL1B has a paralog, RPL1A, that arose from the whole genome duplication; rpl1a rpl1b double null mutation is lethal	III	3.24793	2.58496	1.43296	0.847997	0.584963	-0.736966		-1.32193	IV		II	7	5	0	0	0		214.167	9.49929
YNL197C	WHI3	RNA binding protein that sequesters CLN3 mRNA in cytoplasmic foci; regulates genes involved in the cell cycle, sister chromatid cohesion, and stress response; acts as a cytoplasmic retention factor for Cdc28p and associated cyclins; regulates cell fate and dose-dependently regulates the critical cell size required for passage through Start; Tpk1p (PKA) mediated phosphorylation (S568) inhibits Whi…	III	3.62059	3.20163	2.72247	1.07039	0.925999	0.378512	0.263034				III	3	4	0	0	0	-0.246	37.3877	1.65832
YGL196W	DSD1	D-serine dehydratase (aka D-serine ammonia-lyase); converts D-serine to pyruvate and ammonia by a reaction dependent on pyridoxal 5'-phosphate and zinc; may play a role in D-serine detoxification; L-serine is not a substrate	III	3.56072	3.3505	0.847997	0.765535	0.678072							1	6	1	0	0	0.065	36.4431	1.61642
YPR010C	RPA135	RNA polymerase I second largest subunit A135	III	2.88753	2.16993	1.67807	0.765535	-0.321928	-1.32193				II	III	9	6	0	1	0		339.087	15.0401
YDR101C	ARX1	Nuclear export factor for the ribosomal pre-60S subunit; shuttling factor which directly binds FG rich nucleoporins and facilities translocation through the nuclear pore complex; interacts directly with Alb1p; responsible for Tif6p recycling defects in the absence of Rei1; associated with the ribosomal export complex	III	2.53605	2.03562	1.63227	1.53605	0.378512	-0.736966				II		10	6	0	1	0	0.093	237.791	10.5471
YGL226C-A	OST5	Zeta subunit of the oligosaccharyltransferase complex of the ER lumen; complex catalyzes asparagine-linked glycosylation of newly synthesized proteins	III	3.07039	2.26303	0.925999	0.925999	0.485427			-3.32193	IV	IV	III	2	0	0	0	0	-0.321	115.033	5.10227
YMR126C	DLT1	Protein of unknown function; mutant sensitive to 6-azauracil (6AU) and mycophenolic acid (MPA)	III	3.64386	2.48543	2.32193	1.48543	0.263034	-0.321928	-3.32193				III	6	5	0	2	0	-0.068	21.1896	0.93986
YPR108W	RPN7	Essential non-ATPase regulatory subunit of the 26S proteasome; similar to another S. cerevisiae regulatory subunit, Rpn5p, as well as to mammalian proteasome subunits	III	4.29278	3.53605	1.63227	1.20163	0.678072			-3.32193		III	II	4	7	0	0	1	0.311	148.968	6.60742
YML028W	TSA1	Thioredoxin peroxidase; acts as both ribosome-associated and free cytoplasmic antioxidant; self-associates to form high-molecular weight chaperone complex under oxidative stress; chaperone activity essential for growth in zinc deficiency; required for telomere length maintenance; protein abundance increases, forms cytoplasmic foci during DNA replication stress; TSA1 has a paralog, TSA2, that aros…	III	4.2854	3.51096	1.53605	0.925999	0.137504	0.137504	0.137504		III	III	III	4	5	0	0	0		2142.28	95.0199
YKR050W	TRK2	Component of the Trk1p-Trk2p potassium transport system; contributes to K(+) supply and maintenance of plasma-membrane potential; TRK2 has a paralog, TRK1, that arose from the whole genome duplication	III	2.32193	1.32193	1.26303	0.137504				-3.32193				4	1	0	0	1	-0.389	18.2913	0.811306
YKR099W	BAS1	Myb-related transcription factor; involved in regulating basal and induced expression of genes of the purine and histidine biosynthesis pathways; also involved in regulation of meiotic recombination at specific genes	III	1.72247	1.72247	1.72247	1.72247	1.72247	1.72247	0.378512					6	7	0	1	0	-0.201	46.8488	2.07796
YNL084C	END3	EH domain-containing protein involved in endocytosis; actin cytoskeletal organization and cell wall morphogenesis; forms a complex with Sla1p and Pan1p	III	2.82782	2.43296	2.37851	1.26303							IV	10	7	0	0	1	0.055	79.8849	3.54327
YBR089C-A	NHP6B	High-mobility group (HMG) protein; binds to and remodels nucleosomes; involved in recruiting FACT and other chromatin remodelling complexes to the chromosomes; functionally redundant with Nhp6Ap; required for transcriptional initiation fidelity of some tRNA genes; homologous to mammalian HMGB1 and HMGB2; NHP6B has a paralog, NHP6A, that arose from the whole genome duplication	III	2.82782	2.23266	1.76554	0.485427	0.137504	-0.736966					III	4	7	0	0	0	-0.441	73.0895	3.24186
YIR008C	PRI1	Subunit of DNA primase; DNA primase is required for DNA synthesis and double-strand break repair	III	2.70044	2.65535	2.29278	1.67807	1.48543	0.847997	-3.32193					3	9	1	0	2	0.211	36.8848	1.63601
YJL092W	SRS2	DNA helicase and DNA-dependent ATPase; involved in DNA repair and checkpoint recovery, needed for proper timing of commitment to meiotic recombination and transition from Meiosis I to II; blocks trinucleotide repeat expansion; affects genome stability; disassembles Rad51p nucleoprotein filaments during meiotic recombination; functional homolog of human RTEL1	III	2.88753	2.65535	1	1	1	0.925999				III	III	7	5	0	0	0	-0.144	28.8102	1.27787
YPL128C	TBF1	Telobox-containing general regulatory factor; binds TTAGGG repeats within subtelomeric anti-silencing regions (STARs), blocking silent chromatin propagation; binds majority of snoRNA gene promoters, required for full snoRNA expression; caps DSB flanked by long T2AG3 repeats and blocks checkpoint activation	III	3.9542	2.51096	2.45943	1.20163	1		-1.32193	-3.32193			III	6	5	1	0	2	-0.03	41.4543	1.83869
YJL078C	PRY3	Cell wall-associated protein involved in export of acetylated sterols; member of the CAP protein superfamily (cysteine-rich secretory proteins (CRISP), antigen 5, and pathogenesis related 1 proteins); role in mating efficiency; expression of full-length transcript is daughter cell-specific; in response to alpha factor, a short transcript starting at +452 is expressed and the long form is represse…	III	4.06178	3.10434	2.03562	1.26303		-0.321928	-2.32193				III	1	1	0	0	0	-0.222	13.6909	0.607254
YEL040W	UTR2	Chitin transglycosylase; functions in the transfer of chitin to beta(1-6) and beta(1-3) glucans in the cell wall; similar to and functionally redundant with Crh1; glycosylphosphatidylinositol (GPI)-anchored protein localized to bud neck	III	2.88753	2.10434	1.63227	1.1375	0.765535	0.378512	0.137504	-1				7	7	0	0	1		413.267	18.3303
YGR074W	SMD1	Core Sm protein Sm D1; part of heteroheptameric complex (with Smb1p, Smd2p, Smd3p, Sme1p, Smx3p, and Smx2p) that is part of the spliceosomal U1, U2, U4, and U5 snRNPs; relocalizes to the cytosol in response to hypoxia; homolog of human Sm D1; protein abundance increases in response to DNA replication stress	III	3.67807	3.33628	1.848	1.07039	0.263034	-0.514573						8	6	0	2	0	-0.332	49.6933	2.20413
YER063W	THO1	Conserved nuclear RNA-binding protein; specifically binds to transcribed chromatin in a THO- and RNA-dependent manner, genetically interacts with shuttling hnRNP NAB2; overproduction suppresses transcriptional defect caused by hpr1 mutation	III	4.15381	3.39232	1.848	1		-0.736966				IV	III	11	10	0	0	0	0.151	91.1512	4.04298
YIL009W	FAA3	Long chain fatty acyl-CoA synthetase; activates imported fatty acids; green fluorescent protein (GFP)-fusion protein localizes to the cell periphery	III	3.59694	2.65535	1.848	1.1375	0.925999	0.378512	-0.514573					1	3	0	1	1	-0.994	58.5748	2.59807
YPL096C-A	ERI1	Endoplasmic reticulum membrane protein that binds and inhibits Ras2p; binds to and inhibits GTP-bound Ras2p at the endoplasmic reticulum (ER); component of the GPI-GnT complex which catalyzes the first step in GPI-anchor biosynthesis; probable homolog of mammalian PIG-Y protein	III	3.15381	2.72247	0.847997	0.847997	-0.736966	-1						3	3	0	1	0	-0.776	49.0906	2.1774
YER026C	CHO1	Phosphatidylserine synthase; functions in phospholipid biosynthesis; catalyzes the reaction CDP-diaclyglycerol + L-serine = CMP + L-1-phosphatidylserine, transcriptionally repressed by myo-inositol and choline	III	4.42626	3.66676	3.05311	2.07039	1.20163	0.485427	0.378512		III	III	III	6	8	1	1	1	0.288	139.577	6.19088
YLR221C	RSA3	Protein with a likely role in ribosomal maturation; required for accumulation of wild-type levels of large (60S) ribosomal subunits; binds to the helicase Dbp6p in pre-60S ribosomal particles in the nucleolus	III	3.67807	3.23266	3.12101	2.74416	1.67807	1.1375	-0.514573					10	7	0	1	0	-0.299	133.166	5.90654
YGL040C	HEM2	Aminolevulinate dehydratase; a homo-octameric enzyme, catalyzes the conversion of 5-aminolevulinate to porphobilinogen, the second step in heme biosynthesis; enzymatic activity is zinc-dependent; localizes to the cytoplasm and nucleus	III	3.30743	3	1.96347	1.58496	0.584963	-0.736966	-1.73697	-2.32193	II		III	3	7	0	0	0	0.243	102.404	4.54208
YOL027C	MDM38	Mitochondrial protein; forms a complex with Mba1p to facilitate recruitment of mRNA-specific translational activators to ribosomes; roles in protein export and K+/H+ exchange; human ortholog Letm1 implicated in Wolf-Hirschhorn syndrome	III	3.01792	2.43296	2.26303	2.07039	0.584963	-0.321928	-0.736966		I	II	II	4	2	1	0	0	-0.008	81.8506	3.63046
YBR025C	OLA1	P-loop ATPase with similarity to human OLA1 and bacterial YchF; identified as specifically interacting with the proteasome; null mutant displays increased translation rate and increased readthrough of premature stop codons; protein abundance increases in response to hydrogen peroxide and to DNA replication stress	III	3.66676	2.53605	2.26303	1.53605	1.26303	0.485427	-0.152003		IV		III	9	6	0	0	1		799.458	35.4597
YER048C	CAJ1	Nuclear type II J heat shock protein of the E. coli dnaJ family; contains a leucine zipper-like motif, binds to non-native substrates for presentation to Ssa3p, may function during protein translocation, assembly and disassembly	III	3.67807	3.32193	2.48543	1.96347	1.67807	0.925999	0.378512	-3.32193		III	III	6	5	0	1	0	0.269	105.348	4.67266
YOL042W	NGL1	Putative endonuclease; has a domain similar to a magnesium-dependent endonuclease motif in mRNA deadenylase Ccr4p; the authentic, non-tagged protein is detected in highly purified mitochondria in high-throughput studies	III	3.18587	2.48543	2.45943	1.20163								4	7	1	1	1	0.195	27.896	1.23732
YJL176C	SWI3	Subunit of the SWI/SNF chromatin remodeling complex; SWI/SNF regulates transcription by remodeling chromosomes; contains SANT domain that is required for SWI/SNF assembly; is essential for displacement of histone H2A-H2B dimers during ATP-dependent remodeling; required for transcription of many genes, including ADH1, ADH2, GAL1, HO, INO1 and SUC2; relocates to the cytosol under hypoxic conditions	III	3.40599	2.96347	2.26303	1.48543	0.137504	-1.32193	-1.73697	-3.32193				8	11	1	0	0	0.225	46.5786	2.06598
YBR068C	BAP2	High-affinity leucine permease; functions as a branched-chain amino acid permease involved in uptake of leucine, isoleucine and valine; contains 12 predicted transmembrane domains; BAP2 has a paralog, BAP3, that arose from the whole genome duplication	III	2.40599	1.76554	1.63227	1.58496								5	6	0	0	1	-0.208	190.393	8.44484
YBR142W	MAK5	Essential nucleolar protein; putative DEAD-box RNA helicase required for maintenance of M1 dsRNA virus; involved in biogenesis of large (60S) ribosomal subunits	III	1.76554	1.20163	1.1375	1.07039								9	2	0	0	0	0.125	106.831	4.73844
YKL112W	ABF1	DNA binding protein with possible chromatin-reorganizing activity; involved in transcriptional activation, gene silencing, and DNA replication and repair	III	2.60881	2.29278	2.03562	1.32193	1.07039	0.137504	-2.32193	-3.32193				5	2	0	1	0	-0.314	51.8187	2.2984
YEL037C	RAD23	Protein with ubiquitin-like N terminus; subunit of Nuclear Excision Repair Factor 2 (NEF2) with Rad4p that binds damaged DNA; enhances protein deglycosylation activity of Png1p; also involved, with Rad4p, in ubiquitylated protein turnover	III	2.74416	2.29278	2.03562	1.926	1.63227	-1.73697	-3.32193				III	12	9	1	0	1	0.101	141.593	6.28031
YEL055C	POL5	DNA Polymerase phi; has sequence similarity to the human MybBP1A and weak sequence similarity to B-type DNA polymerases, not required for chromosomal DNA replication; required for the synthesis of rRNA	III	2.26303	1.848	1.80736	1.80736	1.32193	-2.32193		-3.32193	III	II		7	5	0	1	0	-0.166	130.407	5.78417
YNL217W		Putative protein of unknown function; weak sequence similarity to bis (5'-nucleotidyl)-tetraphosphatases; (GFP)-fusion protein localizes to the vacuole; null mutant is highly sensitive to azaserine and resistant to sodium-O-vandate	III	2.65535	1.96347	1.48543	0.378512		-1.32193						6	4	0	1	0	0.245	74.518	3.30522
YNL220W	ADE12	Adenylosuccinate synthase; catalyzes the first step in synthesis of adenosine monophosphate from inosine 5'monophosphate during purine nucleotide biosynthesis; exhibits binding to single-stranded autonomously replicating (ARS) core sequence	III	1.76554	1.53605	1.53605	1.48543	0.137504							7	5	1	0	0		133.894	5.93882
YJL081C	ARP4	Nuclear actin-related protein involved in chromatin remodeling; component of chromatin-remodeling enzyme complexes	III	2.26303	1.58496	1.26303	1				-3.32193		III	III	8	8	0	1	0	0.12	74.0896	3.28622
YPL076W	GPI2	Protein involved in the synthesis of GlcNAc-PI; GlcNAc-PI is the first intermediate in the synthesis of glycosylphosphatidylinositol (GPI) anchors; homologous to the human PIG-C protein; GlcNAc-PI stands for N-acetylglucosaminyl phosphatidylinositol	III	2.88753	2.60881	0.847997	0.847997	0.485427	-0.321928		-2.32193				4	5	0	0	1	-0.266	15.6718	0.69512
YBR221C	PDB1	E1 beta subunit of the pyruvate dehydrogenase (PDH) complex; PDH is an evolutionarily conserved multi-protein complex found in mitochondria	III	2.63227	2.1375	1.926	0.137504								7	6	1	1	0		453.023	20.0937
YIL142W	CCT2	Subunit beta of the cytosolic chaperonin Cct ring complex; related to Tcp1p, required for the assembly of actin and tubulins in vivo	III	3.58496	3.16993	1.43296			-0.152003				III	III	6	7	0	0	0	0.018	245.426	10.8858
YOL019W		Protein of unknown function; green fluorescent protein (GFP)-fusion protein localizes to the cell periphery and vacuole; YOL019W has a paralog, DCV1, that arose from the whole genome duplication	III	3.26303	2.53605	2.32193	1.88752	-0.152003							8	7	0	1	0	0.339	38.6328	1.71354
YIL149C	MLP2	Myosin-like protein associated with the nuclear envelope; nuclear basket protein that connects the nuclear pore complex with the nuclear interior; involved in the Tel1p pathway that controls telomere length; MLP2 has a paralog, MLP1, that arose from the whole genome duplication	III	3.03562	2.63227	2.48543	1.80736	1.1375	0.137504						4	4	1	0	1	-0.523	36.5969	1.62324
YEL017W	GTT3	Protein of unknown function may be involved in glutathione metabolism; function suggested by computational analysis of large-scale protein-protein interaction data; GFP-fusion protein localizes to the nuclear periphery	III	4.32193	2.51096	1.43296	1	1						IV	9	7	1	0	0	-0.014	38.7818	1.72016
YLR435W	TSR2	Protein with a potential role in pre-rRNA processing	III	2.58496	2.56072	2.16993	0.485427	0.263034	-1.32193		-1.73697		II	III	10	6	0	2	0	-0.32	115.56	5.12564
YIL118W	RHO3	Non-essential small GTPase of the Rho/Rac family of Ras-like proteins; involved in the establishment of cell polarity; GTPase activity positively regulated by the GTPase activating protein (GAP) Rgd1p	III	2.72247	2.26303	1.96347	1.37851	0.485427	-1.32193	-1.73697					5	6	1	0	0	0.115	122.901	5.45122
YHR099W	TRA1	Subunit of SAGA and NuA4 histone acetyltransferase complexes; interacts with acidic activators (e.g., Gal4p) which leads to transcription activation; similar to human TRRAP, which is a cofactor for c-Myc mediated oncogenic transformation	III	2.848	1.96347	1.58496	1.20163	0.485427	0.263034	-1.73697			IV		16	9	1	1	0	-0.594	62.2227	2.75987
YML012W	ERV25	Member of the p24 family involved in ER to Golgi transport; role in misfolded protein quality control; forms a heterotrimeric complex with Erp1, Erp2p, and Emp24,	III	3.7866	1.72247	1.53605	0.378512	0.137504							10	5	0	0	0		282.496	12.53
YBL086C		Protein of unknown function; green fluorescent protein (GFP)-fusion protein localizes to the cell periphery	III	3.05311	2.29278	2.10434	1.48543							III	6	2	1	0	1	-0.199	16.3726	0.726202
YGL198W	YIP4	Protein that interacts with Rab GTPases; localized to late Golgi vesicles; computational analysis of large-scale protein-protein interaction data suggests a possible role in vesicle-mediated transport	III	2.37851	2.32193						-0.321928				5	3	0	0	0	-0.492	60.7046	2.69253
YNL067W	RPL9B	Ribosomal 60S subunit protein L9B; homologous to mammalian ribosomal protein L9 and bacterial L6; RPL9B has a paralog, RPL9A, that arose from a single-locus duplication	III	3.73335	2.56072	1.848		-0.152003	-0.514573	-0.514573	-1		I	III	12	9	0	1	0		728.277	32.3025
YGL048C	RPT6	ATPase of the 19S regulatory particle of the 26S proteasome; one of six ATPases of the regulatory particle; involved in the degradation of ubiquitinated substrates; bound by ubiquitin-protein ligases Ubr1p and Ufd4p; localized mainly to the nucleus throughout the cell cycle; protein abundance increases in response to DNA replication stress	III	3.66676	2.32193	1.926	1.926	0.584963	0.378512	-3.32193	-1.32193		IV		6	8	0	1	0		203.681	9.03422
YKL032C	IXR1	Transcriptional repressor that regulates hypoxic genes during normoxia; involved in the aerobic repression of genes such as COX5b, TIR1, and HEM13; binds DNA intrastrand cross-links formed by cisplatin; HMG (high mobility group box) domain containing protein which binds and bends cisplatin-modified DNA, blocking excision repair; IXR1 has a paralog, ABF2, that arose from the whole genome duplicati…	III	2.20163	1.53605	0.847997	0.485427	0.263034	-0.152003		-2.32193				6	7	0	0	2	-0.27	37.2471	1.65208
YFL038C	YPT1	Rab family GTPase; involved in the ER-to-Golgi step of the secretory pathway; complex formation with the Rab escort protein Mrs6p is required for prenylation of Ypt1p by protein geranylgeranyltransferase type II (Bet2p-Bet4p); binds to unspliced HAC1 mRNA; regulates unfolded protein response (UPR) by promoting the decay of HAC1 RNA	III	2.848	2.32193	1.72247	1.37851	0.485427	-0.152003	-3.32193		IV		III	11	9	0	0	0		431.194	19.1255
YCR016W		Putative protein of unknown function; green fluorescent protein (GFP)-fusion protein localizes to the nucleolus and nucleus; predicted to be involved in ribosome biogenesis	III	4.01792	3.33628	2.90689	1.848	1.848	0.584963	-1					6	5	0	0	0	-0.007	88.8305	3.94005
YNL237W	YTP1	Probable type-III integral membrane protein of unknown function; has regions of similarity to mitochondrial electron transport proteins	III	3.7115	1.96347	1.26303	0.925999	-0.736966	-1		-0.736966			III	3	6	0	1	1		1.45599	0.0645798
YMR263W	SAP3	Component of Rpd3L histone deacetylase complex; involved in silencing at telomeres, rDNA, and silent mating-type loci; involved in telomere maintenance	III	3.41954	1.07039	1.07039	1.07039	1							5	6	0	0	0	-0.653	27.5973	1.22407
YMR194C-B	CMC4	Protein that localizes to the mitochondrial intermembrane space; localizes via the Mia40p-Erv1p system; contains twin cysteine-x(9)-cysteine motifs	III	3.45943	2.53605	1.926	1.48543	1.20163	0.584963	-3.32193				II	4	4	0	0	0	0.173	4.62632	0.205199
YIR023W	DAL81	Positive regulator of genes in multiple nitrogen degradation pathways; contains DNA binding domain but does not appear to bind the dodecanucleotide sequence present in the promoter region of many genes involved in allantoin catabolism	III	2.88753	1.20163	1.1375	1.1375	1.1375	1.07039						10	11	0	0	1	-0.232	25.5604	1.13372
YNL273W	TOF1	Subunit of a replication-pausing checkpoint complex; Tof1p-Mrc1p-Csm3p acts at the stalled replication fork to promote sister chromatid cohesion after DNA damage, facilitating gap repair of damaged DNA; interacts with the MCM helicase; relocalizes to the cytosol in response to hypoxia	III	3.30743	2.67807	2.32193	1.32193	-0.321928	-0.514573		1.07039		III	IV	2	2	0	0	1	0.085	15.6402	0.693717
YMR288W	HSH155	U2-snRNP associated splicing factor; forms extensive associations with the branch site-3' splice site-3' exon region upon prespliceosome formation; similarity to the mammalian U2 snRNP-associated splicing factor SAP155	III	3.18587	1.926	1.20163	0.378512	-0.152003			-3.32193				7	8	0	0	0	-0.358	23.0207	1.02107
YBL055C		3'-->5' exonuclease and endonuclease with a possible role in apoptosis; has similarity to mammalian and C. elegans apoptotic nucleases	III	3.7866	3.27799	2.56072	1.848	1.26303	0.485427	-1.73697					4	4	0	0	0		51.8968	2.30187
YPL255W	BBP1	Protein required for the spindle pole body (SPB) duplication; localizes at the cytoplasmic side of the central plaque periphery of the SPB; forms a complex with a nuclear envelope protein Mps2p and SPB components Spc29p and Kar1p; required for mitotic functions of Cdc5p	III	2.3505	0.847997	0.765535	0.678072	0.263034	-1.32193					III	2	8	0	1	1	-0.272	18.556	0.823046
YEL018W	EAF5	Non-essential subunit of the NuA4 acetyltransferase complex; Esa1p-associated factor; relocalizes to the cytosol in response to hypoxia	III	3.21723	2.67807	1.926	1.26303	1.07039	0.765535	-0.152003	-3.32193				2	1	0	0	1	-0.55	15.563	0.690292
YOR288C	MPD1	Member of the protein disulfide isomerase (PDI) family; interacts with and inhibits the chaperone activity of Cne1p; MPD1 overexpression in a pdi1 null mutant suppresses defects in Pdi1p functions such as carboxypeptidase Y maturation	III	2.848	1.43296	0.925999	0.925999	0.137504	-1.32193	-1.73697	-1.73697			IV	5	7	1	0	1	0.175	31.0006	1.37502
YNL182C	IPI3	Component of the Rix1 complex and pre-replicative complexes (pre-RCs); required for processing of ITS2 sequences from 35S pre-rRNA; component of the pre-60S ribosomal particle with the dynein-related AAA-type ATPase Mdn1p; required for pre-RC formation and maintenance during DNA replication licensing; highly conserved protein which contains several WD40 motifs; IPI3 is an essential gene; other me…	III	3.97269	3.21723	3.12101	1.58496	-0.321928	-0.514573	-1			I	II	7	4	0	1	0	0.326	127.367	5.64931
YBR191W	RPL21A	Ribosomal 60S subunit protein L21A; homologous to mammalian ribosomal protein L21, no bacterial homolog; RPL21A has a paralog, RPL21B, that arose from the whole genome duplication	III	3.01792	2.3505	1.88752	1.48543	0.765535	0.584963	-1					7	7	0	0	1		1447.83	64.2178
YJL001W	PRE3	Beta 1 subunit of the 20S proteasome; responsible for cleavage after acidic residues in peptides	III	2.10434			-0.152003	-0.152003	-0.152003	-0.152003					4	3	1	0	0		159.962	7.09505
YLL023C	POM33	Transmembrane nucleoporin; involved in nuclear pore complex (NPC) distribution, assembly or stabilization; highly conserved across species, orthologous to human TMEM33 and paralogous to Per33p; protein abundance increases in response to DNA replication stress	III	2.48543	2.1375	1.80736	1.37851	0.847997	0.485427	0.263034					5	5	0	0	0	-0.039	40.516	1.79708
YOL065C	INP54	Phosphatidylinositol 4,5-bisphosphate 5-phosphatase; role in secretion; localizes to the endoplasmic reticulum via the C-terminal tail; lacks the Sac1 domain and proline-rich region found in the other 3 INP proteins	III	3.16993	1.848	1	0.925999	0.137504						III	4	8	0	0	1	0.197	17.9855	0.797739
YIL052C	RPL34B	Ribosomal 60S subunit protein L34B; homologous to mammalian ribosomal protein L34, no bacterial homolog; RPL34B has a paralog, RPL34A, that arose from the whole genome duplication	III	3.43296	1.96347	1.88752	1.32193	1				IV	IV	III	3	3	0	0	0		1034.56	45.8878
YKL172W	EBP2	Required for 25S rRNA maturation and 60S ribosomal subunit assembly; localizes to the nucleolus and in foci along nuclear periphery; constituent of 66S pre-ribosomal particles; cooperates with Rrs1p and Mps3p to mediate telomere clustering by binding Sir4p, but is not involved in telomere tethering	III	2.94486	1	0.847997	0.765535	0.765535	0.678072	-3.32193			I	III	12	6	1	1	0	-0.11	157.901	7.00365
YDR156W	RPA14	RNA polymerase I subunit A14	III	2.7866	2.10434	2.10434	1.926						I	III	7	1	0	1	0	-0.219	86.0163	3.81523
YGR079W		Putative protein of unknown function; YGR079W is not an essential gene	III	3.74416	3.20163	2.1375	0.584963	0.378512	0.263034					III	2	6	0	0	0	0.126	93.4081	4.14309
YGR103W	NOP7	Component of several different pre-ribosomal particles; forms a complex with Ytm1p and Erb1p that is required for maturation of the large ribosomal subunit; required for exit from G<sub>0</sub> and the initiation of cell proliferation	III	3.57289	2.926	2.37851	1.20163	0.765535	0.378512	-1		IV	I		11	11	0	1	2	0.138	414.371	18.3793
YOR249C	APC5	Subunit of the Anaphase-Promoting Complex/Cyclosome (APC/C); APC/C is a ubiquitin-protein ligase required for degradation of anaphase inhibitors, including mitotic cyclins, during the metaphase/anaphase transition; component of the platform domain of the APC/C, based on structural analysis; relative distribution to nuclear foci decreases upon DNA replication stress	III	1.53605	1.20163	0.925999	0.485427	0.485427	0.263034					III	5	7	0	0	0	-0.036	15.2147	0.674843
YJR145C	RPS4A	Protein component of the small (40S) ribosomal subunit; mutation affects 20S pre-rRNA processing; homologous to mammalian ribosomal protein S4, no bacterial homolog; RPS4A has a paralog, RPS4B, that arose from the whole genome duplication	III	3.7761	2.94486	2.26303	1.07039	0.378512	-0.736966	-1			IV		13	10	1	0	1		993.756	44.0777
YGL201C	MCM6	Protein involved in DNA replication; component of the Mcm2-7 hexameric helicase complex that binds chromatin as a part of the pre-replicative complex; forms a subcomplex with Mcm4p and Mcm7p	III	3.57289	2.07039	0.584963	0.263034				-1.32193				7	13	0	0	1	0.168	37.4931	1.663
YKL061W	BLI1	Subunit of the BLOC-1 complex involved in endosomal maturation; interacts with Msb3p; green fluorescent protein (GFP)-fusion protein localizes to the endosome	III	2.53605	2	1.43296	1	0.263034							0	1	0	0	1	-0.69	21.8946	0.97113
YLR182W	SWI6	Transcription cofactor; forms complexes with Swi4p and Mbp1p to regulate transcription at the G1/S transition; involved in meiotic gene expression; also binds Stb1p to regulate transcription at START; cell wall stress induces phosphorylation by Mpk1p, which regulates Swi6p localization; required for the unfolded protein response, independently of its known transcriptional coactivators	III	2.48543	1.76554	1.72247	1.20163								8	6	0	0	1	-0.033	25.5899	1.13503
YAR007C	RFA1	Subunit of heterotrimeric Replication Protein A (RPA); RPA is a highly conserved single-stranded DNA binding protein involved in DNA replication, repair, and recombination; RPA protects against inappropriate telomere recombination, and upon telomere uncapping, prevents cell proliferation by a checkpoint-independent pathway; role in DNA catenation/decatenation pathway of chromosome disentangling; …	III	4.36457	2.48543	2.45943	1.63227	-0.514573	-0.736966				I	III	11	5	0	1	0	0.138	59.4163	2.63539
YBR049C	REB1	RNA polymerase I enhancer binding protein; DNA binding protein that binds to genes transcribed by both RNA polymerase I and RNA polymerase II; required for termination of RNA polymerase I transcription; Reb1p bound to DNA acts to block RNA polymerase II readthrough transcription	III	2.94486	2.67807	2.40599	1.88752	0.925999	0.263034	-0.514573					4	8	1	0	1	-0.21	64.2892	2.85153
YML052W	SUR7	Plasma membrane protein, component of eisosomes; long-lived protein that remains stable in eisosomes of mother cells while other eisosome proteins, Pil1p and Lsp1p, turn over; may function to anchor the eisosome in place; sporulation and plasma membrane sphingolipid content are altered in mutants; localizes to furrow-like invaginations (MCC patches)	III	2.53605	2.03562	1.63227	1.1375	0.678072	-0.736966	-2.32193	-3.32193			III	6	5	0	1	0		112.961	5.01035
YEL020W-A	TIM9	Essential protein of the mitochondrial intermembrane space; forms a complex with Tim10p (TIM10 complex) that delivers hydrophobic proteins to the TIM22 complex for insertion into the inner membrane	III	4.27053	2.926	1.48543	1.48543	1.37851	1.1375	-1.32193		I		II	4	7	1	0	1	-0.121	94.6532	4.19831
YJL203W	PRP21	Subunit of the SF3a splicing factor complex; required for spliceosome assembly	III	2.20163	2.20163	2.20163	2.10434	1.76554	1.67807						4	5	1	0	1	0.294	13.0276	0.577834
YLR108C		Protein of unknown function; green fluorescent protein (GFP)-fusion protein localizes to the nucleus; YLR108C is not an esssential gene; protein abundance increases in response to DNA replication stress; YLR108C has a paralog, YDR132C, that arose from the whole genome duplication	III	4.18587	1.20163	1	0.485427	-0.152003	-0.321928					III	8	4	0	0	1	0.548	19.6134	0.869948
YNL268W	LYP1	Lysine permease; one of three amino acid permeases (Alp1p, Can1p, Lyp1p) responsible for uptake of cationic amino acids	III	3.16993	1.67807	1.58496	-0.152003					IV	II		4	2	0	1	0	0.345	100.435	4.45477
YNL129W	NRK1	Nicotinamide riboside kinase; catalyzes the phosphorylation of nicotinamide riboside and nicotinic acid riboside in salvage pathways for NAD+ biosynthesis	III	3.52356	0.765535	0.765535	0.765535	0.678072							3	2	0	0	0	0.202	38.8941	1.72514
YDL201W	TRM8	Noncatalytic subunit of a tRNA methyltransferase complex; Trm8p and Trm82p comprise an enzyme that catalyzes a methyl-transfer from S-adenosyl-l-methionine to the N(7) atom of guanine at position 46 in tRNA; Trm8 lacks catalytic activity if not bound to Trm82p	III	3.60881	3.21723	2.45943	1.53605	0.137504					IV		9	3	0	0	1	-0.153	139.465	6.18592
YER169W	RPH1	JmjC domain-containing histone demethylase; specifically demethylates H3K36 tri- and dimethyl modification states; associates with actively transcribed (RNAP II) regions in vivo and specifically targets H3K36 in its trimethylation state as its substrate; transcriptional repressor of PHR1; Rph1p phosphorylation during DNA damage is under control of the MEC1-RAD53 pathway; target of stess-induced h…	III	2.58496	2.07039	2.03562	1.20163	1.1375	0.925999						8	6	0	0	0	-0.112	36.9928	1.6408
YHR137W	ARO9	Aromatic aminotransferase II; catalyzes the first step of tryptophan, phenylalanine, and tyrosine catabolism	III	3.80735	2.80735	2.40599	1.07039	0.263034				IV	III		5	6	0	0	0	0.388	27.4898	1.2193
YER050C	RSM18	Mitochondrial ribosomal protein of the small subunit; has similarity to E. coli S18 ribosomal protein	III	2.80735	2.1375	1.63227	1.58496	1.58496	1.37851	-2.32193		II			7	6	1	0	1	-0.493	86.0944	3.81869
YHR136C	SPL2	Protein with similarity to cyclin-dependent kinase inhibitors; downregulates low-affinity phosphate transport during phosphate limitation by targeting Pho87p to the vacuole; upstream region harbors putative hypoxia response element (HRE) cluster; overproduction suppresses a plc1 null mutation; promoter shows an increase in Snf2p occupancy after heat shock; GFP-fusion protein localizes to the cyto…	III	3.66676	2.7866	1.58496	1.58496	1.58496	1.48543						2	3	0	0	0	-0.183	61.5833	2.73151
YLR357W	RSC2	Component of the RSC chromatin remodeling complex; required for expression of mid-late sporulation-specific genes; involved in telomere maintenance; RSC2 has a paralog, RSC1, that arose from the whole genome duplication	III	3.65535	3.27799	2.65535	2.48543	1.07039	0.847997	0.137504	-1.73697			III	5	10	0	0	1		41.2499	1.82963
YPL079W	RPL21B	Ribosomal 60S subunit protein L21B; homologous to mammalian ribosomal protein L21, no bacterial homolog; RPL21B has a paralog, RPL21A, that arose from the whole genome duplication	III	3.81762	3.03562	2.56072	2.03562		-3.32193						7	5	0	0	0		1106.03	49.0577
YJR009C	TDH2	Glyceraldehyde-3-phosphate dehydrogenase (GAPDH), isozyme 2; involved in glycolysis and gluconeogenesis; tetramer that catalyzes reaction of glyceraldehyde-3-phosphate to 1,3 bis-phosphoglycerate; detected in cytoplasm and cell wall; protein abundance increases in response to DNA replication stress; GAPDH-derived antimicrobial peptides are active against a wide variety of wine-related yeasts and …	III	3.43296	2.51096	1.20163	-0.514573	-0.736966	-3.32193	-3.32193					4	3	0	0	0		2019.8	89.5876
YGR159C	NSR1	Nucleolar protein that binds nuclear localization sequences; required for pre-rRNA processing and ribosome biogenesis	III	3.89724	3.30743	1.20163	-0.321928	-1.32193	-1.32193		-3.32193		I		13	4	0	1	0		868.472	38.5208
YMR264W	CUE1	Ubiquitin-binding protein; endoplasmic reticulum membrane protein that recruits the ubiquitin-conjugating enzyme Ubc7p to the ER where it functions in protein degradation; contains a CUE domain that binds ubiquitin to facilitate intramolecular monoubiquitination; CUE1 has a paralog, CUE4, that arose from the whole genome duplication	III	3.64386	2.74416	1.926	0.925999	0.925999	-1.73697	-3.32193	-3.32193			IV	6	10	1	1	0	0.206	84.2517	3.73696
YDR487C	RIB3	3,4-dihydroxy-2-butanone-4-phosphate synthase (DHBP synthase); required for riboflavin biosynthesis from ribulose-5-phosphate, also has an unrelated function in mitochondrial respiration	III	2.848	2.10434	1.926	1.67807	-3.32193			-1.32193	III			4	9	2	0	0	-0.214	228.735	10.1455
YOR133W	EFT1	Elongation factor 2 (EF-2), also encoded by EFT2; catalyzes ribosomal translocation during protein synthesis; contains diphthamide, the unique posttranslationally modified histidine residue specifically ADP-ribosylated by diphtheria toxin; EFT1 has a paralog, EFT2, that arose from the whole genome duplication	III	4.80736	3.37851	2.60881	0.584963	-0.736966						III	8	8	0	0	0		61.2896	2.71848
YMR274C	RCE1	Type II CAAX prenyl protease; involved in the proteolysis and maturation of Ras and the a-factor mating pheromone	III	2.40599	2.40599	1.926	1.26303	-3.32193						IV	6	2	0	1	0	0.047	14.0609	0.623665
YDR398W	UTP5	Subunit of U3-containing Small Subunit (SSU) processome complex; involved in production of 18S rRNA and assembly of small ribosomal subunit	III	3.39232	2.37851	2.07039	-1								8	2	0	0	0	0.094	109.953	4.87691
YDL100C	GET3	Guanine nucleotide exchange factor for Gpa1p; amplifies G protein signaling; functions as a chaperone under ATP-depleted oxidative stress conditions; subunit of GET complex, involved in ATP dependent Golgi to ER trafficking and insertion of tail-anchored (TA) proteins into ER membrane under non-stress conditions; binds as dimer to transmembrane domain (TMD) cargo, shielding TMDs from aqueous solv…	III	2.51096	2.40599	1.63227	1.53605	1.43296	-3.32193		-3.32193		III		4	8	0	0	0		418.219	18.55
YNL132W	KRE33	Protein required for biogenesis of the small ribosomal subunit; heterozygous mutant shows haploinsufficiency in K1 killer toxin resistance; essential gene; NAT10, the human homolog, implicated in several types of cancer and premature aging.	III	4.08746	3.3505	1.53605	-1.73697						I		11	4	0	1	0	-0.105	165.473	7.33951
YJR109C	CPA2	Large subunit of carbamoyl phosphate synthetase; carbamoyl phosphate synthetase catalyzes a step in the synthesis of citrulline, an arginine precursor	III	3.7761	2.20163	1	-0.152003	-3.32193					I	III	9	6	0	1	0	-0.416	66.6944	2.95821
YER088C	DOT6	Protein involved in rRNA and ribosome biogenesis; activated in stochastic pulses of nuclear localization; binds polymerase A and C motif; subunit of the RPD3L histone deacetylase complex; has chromatin specific SANT domain; involved in telomeric gene silencing and filamentation; relative distribution to the nucleus increases upon DNA replication stress	III	2.76553	2.60881	1.07039	-0.152003	-1							5	7	0	0	0	0.238	58.7201	2.60451
YLR044C	PDC1	Major of three pyruvate decarboxylase isozymes; key enzyme in alcoholic fermentation; decarboxylates pyruvate to acetaldehyde; involved in amino acid catabolism; subject to glucose-, ethanol-, and autoregulation; activated by phosphorylation in response to glucose levels; N-terminally propionylated in vivo	III	4.00899	3.07039	1.1375	0.485427	-1.32193	-2.32193			III	IV	II	6	3	0	0	0		13857.1	614.627
YHR167W	THP2	Subunit of the THO and TREX complexes; THO connects transcription elongation and mitotic recombination, and TREX is recruited to activated genes and couples transcription to mRNA export; involved in telomere maintenance	III	2.65535	1.926	1.848	0.847997		-1.73697	-3.32193				III	5	4	0	0	0	-0.21	22.0928	0.979919
YDR132C		Protein of unknown function; protein increases in abundance and relative distribution to the nucleus increases upon DNA replication stress; YDR132C has a paralog, YLR108C, that arose from the whole genome duplication	III	3.60881	2.53605	1.72247	1.67807	-0.514573	-0.736966	-3.32193					7	2	0	0	0	0.255	10.0147	0.444197
YGL148W	ARO2	Bifunctional chorismate synthase and flavin reductase; catalyzes the conversion of 5-enolpyruvylshikimate 3-phosphate (EPSP) to form chorismate, which is a precursor to aromatic amino acids; protein abundance increases in response to DNA replication stress	III	4.41278	3.07039	2.76553		-1					III		6	5	1	0	1		446.149	19.7888
YGR185C	TYS1	Cytoplasmic tyrosyl-tRNA synthetase; required for cytoplasmic protein synthesis; interacts with positions 34 and 35 of the tRNATyr anticodon; mutations in human ortholog YARS are associated with Charcot-Marie-Tooth (CMT) neuropathies; protein abundance increases in response to DNA replication stress	III	3.10434	2.58496	1.72247	0.263034	-0.514573	-1.73697						5	6	0	0	0		411.821	18.2662
YNL007C	SIS1	Type II HSP40 co-chaperone that interacts with the HSP70 protein Ssa1p; shuttles between cytosol and nucleus; mediates delivery of misfolded proteins into the nucleus for degradation; involved in proteasomal degradation of misfolded cytosolic proteins; protein abundance increases in response to DNA replication stress; polyQ aggregates sequester Sis1p and interfere with clearance of misfolded prot…	III	3	2.74416	2.56072	0.925999	-1							6	6	0	0	0		132.138	5.86093
YLR455W	PDP3	Component of the NuA3b histone acetyltransferase complex; regulates interaction between NuA3b and H3K36me3 at the transcribed regions of genes; contains PWWP domain; deletion confers sensitivity to 4-(N-(S-glutathionylacetyl)amino) phenylarsenoxide (GSAO); protein abundance increases in response to DNA replication stress; relocalizes to the cytosol in response to hypoxia	III	2.8679	1.48543	1.07039	1	0.137504	-3.32193						3	6	0	0	1	-0.308	34.6573	1.53721
YBR286W	APE3	Vacuolar aminopeptidase Y; processed to mature form by Prb1p	III	3.30743	2.82782	1.848	-1.32193	-2.32193							4	8	0	0	1		567.2	25.158
YAL023C	PMT2	Protein O-mannosyltransferase of the ER membrane; transfers mannose residues from dolichyl phosphate-D-mannose to protein serine/threonine residues; involved in ER quality control; acts in a complex with Pmt1p, can instead interact with Pmt5p; antifungal drug target; PMT2 has a paralog, PMT3, that arose from the whole genome duplication	III	3.20163	2.80735	2.37851	0.678072	-0.321928	-1	-3.32193					3	4	0	0	0	-0.076	267.437	11.8621
YKL214C	YRA2	Member of the REF (RNA and export factor binding proteins) family; when overexpressed, can substitute for the function of Yra1p in export of poly(A)+ mRNA from the nucleus	III	3.57289	3.15381	1.48543	0.137504							III	5	5	1	0	0	-0.151	68.4843	3.0376
YMR086W	SEG1	Component of eisosome required for proper eisosome assembly; precedes Pil1p/Lsp1p during eisosome formation, controls eisosome length and shape; diffusely distributed, forms heterogeneous patches at plasma membrane in small buds, also found in medium and large buds; expression repressed by cAMP; similar to A. gossypii SEG gene and to S. pombe Sle1p, important for generating eisosomes; SEG1 has a …	III	3.44626	3.20163	2.40599	1	-2.32193	-3.32193	-3.32193	0.137504		III	III	8	8	0	2	0	-0.313	26.8823	1.19235
YNL059C	ARP5	Nuclear actin-related protein involved in chromatin remodeling; component of chromatin-remodeling enzyme complexes; promotes nucleosome shifts in the 3 prime direction	III	2.16993	2.03562	1.848	0.847997	-1.32193	-3.32193	-3.32193					6	8	0	0	1	0.297	54.5681	2.42035
YDL240W	LRG1	GTPase-activating protein (GAP); contains Rho1p-specific GAP activity, interacting with activated forms of Rho1p; functions along with Sac7p as a negative regulator of the Pkc1p-mediated cell wall integrity signaling pathway; negative regulator of cell wall 1,3-beta-glucan biosynthesis; required for efficient cell fusion; contains a RhoGAP domain and three Lin-11-Isl1-Mec-3 (LIM) domains	III	2.848	2.07039	1.88752	1.43296	-2.32193	-3.32193						5	6	1	0	1	0.075	26.2029	1.16222
YML027W	YOX1	Homeobox transcriptional repressor; binds to Mcm1p and to early cell cycle boxes (ECBs) in the promoters of cell cycle-regulated genes expressed in M/G1 phase; expression is cell cycle-regulated; phosphorylated by Cdc28p; relocalizes from nucleus to cytoplasm upon DNA replication stress; YOX1 has a paralog, YHP1, that arose from the whole genome duplication	III	4.00899	3.33628	2.03562	1.58496	-0.152003						III	9	7	0	0	0	-0.125	22.7447	1.00883
YLR321C	SFH1	Component of the RSC chromatin remodeling complex; essential gene required for cell cycle progression and maintenance of proper ploidy; phosphorylated in the G1 phase of the cell cycle; Snf5p paralog	III	2.63227	2.53605	1.80736	1.37851	-0.514573	-1	-3.32193				II	7	10	0	0	1	-0.021	42.6118	1.89003
YBR143C	SUP45	Polypeptide release factor (eRF1) in translation termination; mutant form acts as a recessive omnipotent suppressor; methylated by Mtq2p-Trm112p in ternary complex eRF1-eRF3-GTP; mutation of methylation site confers resistance to zymocin; has a role in cytokinesis through interaction with Mlc1p	III	4.37851	3.59694	1.48543	0.378512	-1	-3.32193				I		12	4	0	2	0		435.249	19.3053
YAL060W	BDH1	NAD-dependent (R,R)-butanediol dehydrogenase; catalyzes oxidation of (R,R)-2,3-butanediol to (3R)-acetoin, oxidation of meso-butanediol to (3S)-acetoin, and reduction of acetoin; enhances use of 2,3-butanediol as an aerobic carbon source	III	2.82782	2.03562	1.53605	1.26303	-0.736966	-3.32193	-3.32193					3	5	0	0	0	0.136	50.687	2.24821
YCL009C	ILV6	Regulatory subunit of acetolactate synthase; acetolactate synthase catalyzes the first step of branched-chain amino acid biosynthesis; enhances activity of the Ilv2p catalytic subunit, localizes to mitochondria	III	3.51096	3.03562	3	-0.152003	-0.152003						III	4	6	0	0	0		337.05	14.9497
YNL175C	NOP13	Nucleolar protein found in preribosomal complexes; contains an RNA recognition motif (RRM); relative distribution to the nucleolus increases upon DNA replication stress	III	3.37851	2.8679	1.848	0.378512	-0.736966	-3.32193				III		12	4	0	1	0	0.087	182.561	8.09741
YOR373W	NUD1	Component of the spindle pole body outer plaque; acts through the mitotic exit network to specify asymmetric spindle pole body inheritance	III	3.12101	2.63227	1.63227	-1				-1			III	4	3	1	0	0	0.095	16.9149	0.750253
YOR110W	TFC7	RNA pol III transcription initiation factor complex (TFIIIC) subunit; part of the TauA globular domain of TFIIIC that binds DNA at the BoxA promoter sites of tRNA and similar genes; TFC7 has a paralog, YNL108C, that arose from the whole genome duplication	III	4.99549	3.83794	3.44626	1.848	-3.32193						III	4	7	0	1	0	0.128	28.4483	1.26182
YBR078W	ECM33	GPI-anchored protein of unknown function; possible role in apical bud growth; GPI-anchoring on the plasma membrane crucial to function; phosphorylated in mitochondria; similar to Sps2p; ECM33 has a paralog, PST1, that arose from the whole genome duplication	III	3.59694	2.67807	1.20163	0.485427	-1.73697	-3.32193					III	5	11	0	0	1		781.612	34.6681
YPL254W	HFI1	Adaptor protein required for structural integrity of the SAGA complex; a histone acetyltransferase-coactivator complex that is involved in global regulation of gene expression through acetylation and transcription functions	III	4.09592	3.08746	2.37851	0.847997		-3.32193					III	5	8	1	0	1	-0.31	37.1102	1.64601
YBR081C	SPT7	Subunit of the SAGA transcriptional regulatory complex; involved in proper assembly of the complex; also present as a C-terminally truncated form in the SLIK/SALSA transcriptional regulatory complex	III	4.21723	3.36457	3.10434	1.20163	1.1375	-3.32193	-3.32193			IV	III	11	6	0	0	0	-0.133	24.2949	1.07759
YCL027W	FUS1	Membrane protein localized to the shmoo tip; required for cell fusion; expression regulated by mating pheromone; proposed to coordinate signaling, fusion, and polarization events required for fusion; potential Cdc28p substrate	III	3.40599	2.40599	1.20163	0.137504	-0.152003	-3.32193		-0.736966		III		6	6	1	0	1	-0.284	24.1868	1.0728
YNL232W	CSL4	Exosome non-catalytic core component; involved in 3'-5' RNA processing and degradation in both the nucleus and the cytoplasm; predicted to contain an S1 RNA binding domain; has similarity to human hCsl4p (EXOSC1)	III	3.7115	3.29278	2.53605	-1.32193	-3.32193	-3.32193		-0.514573		IV		5	5	0	0	0	-0.143	83.3617	3.69748
YLR285C-A		Putative protein of unknown function; identified by fungal homology and RT-PCR	III	4.29278	3.26303	2.98185	2.37851	-2.32193	-3.32193					III	1	0	0	0	0	-1.621	466.397	20.6869
YDR335W	MSN5	Karyopherin; involved in nuclear import and export of proteins, including import of replication protein A and export of Far1p and transcription factors Swi5p, Swi6p, Msn2p, and Pho4p; required for re-export of mature tRNAs after their retrograde import from the cytoplasm; exportin-5 homolog	III	4.14568	3.48543	3.03562	2	-1.32193	-2.32193	-3.32193				II	9	7	1	0	0	-0.3	30.0065	1.33093
YER093C-A	AIM11	Protein of unknown function; null mutant is viable but shows increased loss of mitochondrial genome and synthetic interaction with prohibitin (phb1); contains an intron; YER093C-A has a paralog, YBL059W, that arose from the whole genome duplication	III	3.40599	3.30743	0.925999	0.378512	-0.152003	-3.32193	-3.32193	-0.152003	II			3	8	1	0	0	-0.483	12.2123	0.541671
YPL013C	MRPS16	Mitochondrial ribosomal protein of the small subunit	III	4.20945	2.94486	2.88753						I			8	6	2	0	0	-0.673	61.3374	2.7206
YLR285W	NNT1	S-adenosylmethionine-dependent methyltransferase; has a role in rDNA silencing and in lifespan determination	III	4.1127	2.43296	1	1	-3.32193							5	5	0	0	0	-0.027	67.0998	2.97619
YPR091C	NVJ2	Lipid-binding ER protein, enriched at nucleus-vacuolar junctions (NVJ); may be involved in sterol metabolism or signaling at the NVJ; contains a synaptotagmin-like-mitochondrial-lipid binding protein (SMP) domain; binds phosphatidylinositols and other lipids in a large-scale study; may interact with ribosomes, based on co-purification experiments	III	3.83794	3.67807	1.80736	-1.73697				-3.32193			II	6	2	1	0	0	-0.169	45.178	2.00386
YIL103W	DPH1	Protein required for synthesis of diphthamide; required along with Dph2p, Kti11p, Jjj3p, and Dph5p; diphthamide is a modified histidine residue of translation elongation factor 2 (Eft1p or Eft2p); may act in a complex with Dph2p and Kti11p	III	4.01792	3.29278	1.72247	1.58496	-3.32193					IV		7	5	0	0	1	0.37	61.0662	2.70857
YOR032C	HMS1	bHLH protein with similarity to myc-family transcription factors; overexpression confers hyperfilamentous growth and suppresses the pseudohyphal filamentation defect of a diploid mep1 mep2 homozygous null mutant	III	4.05311	3.27799	2.76553	1.07039	0.485427	-3.32193					III	4	8	0	0	1		0.324534	0.0143946
YBR129C	OPY1	Protein of unknown function; overproduction blocks cell cycle arrest in the presence of mating pheromone; the authentic, non-tagged protein is detected in highly purified mitochondria in high-throughput studies	III	2.43296	2.26303	2.1375	1.1375	0.378512	-1.73697	-3.32193	-3.32193				10	9	0	1	1	0.628	40.8899	1.81366
YNR043W	MVD1	Mevalonate pyrophosphate decarboxylase; essential enzyme involved in the biosynthesis of isoprenoids and sterols, including ergosterol; acts as a homodimer	III	3.64386	3	2.43296	1.48543								3	5	0	1	0		206.987	9.18085
YNL138W	SRV2	CAP (cyclase-associated protein); N-terminus binds adenylate cyclase and facilitates activation by RAS; N-terminus forms novel hexameric star-shaped shuriken structures that directly catalyze cofilin-mediated severing of actin filaments; C-terminus, in physically and genetically separate activity, binds and recycles cofilin bound, ADP-actin monomers, facilitating regulation of actin dynamics and …	III	5.48543	4.23266	2.65535	0.925999		-3.32193	-3.32193			IV	II	4	3	1	0	0		173.694	7.70413
YER043C	SAH1	S-adenosyl-L-homocysteine hydrolase; catabolizes S-adenosyl-L-homocysteine which is formed after donation of the activated methyl group of S-adenosyl-L-methionine (AdoMet) to an acceptor; regulates cellular lipid homoeostasis by regulating phosphatidylcholine(PC)synthesis and triacylglycerol (TG) levels	III	3.41954	2.48543	1	-0.152003	-1.32193	-1.73697			III	IV	III	5	8	0	0	1		1113.29	49.3794
YAL035W	FUN12	Translation initiation factor eIF5B; GTPase that promotes Met-tRNAiMet binding to ribosomes and ribosomal subunit joining; promotes GTP-dependent maturation of 18S rRNA by Nob1p; protein abundance increases in response to DNA replication stress; homolog of bacterial IF2	III	3.73335	3.08746	2.53605	-0.514573	-2.32193				IV	I		13	5	1	0	0		302.965	13.4379
YMR270C	RRN9	Protein involved in promoting high level transcription of rDNA; subunit of UAF (upstream activation factor) for RNA polymerase I	III	2.74416	1.848	1.48543	0.137504	-0.736966	-2.32193	-3.32193					1	5	0	0	1	0.103	33.0127	1.46427
YGL050W	TYW3	tRNA methyltransferase required for synthesis of wybutosine; a modified guanosine found at the 3'-position adjacent to the anticodon of phenylalanine tRNA which supports reading frame maintenance by stabilizing codon-anticodon interactions	III	3.01792	2.16993	1.96347	1.76554	-1	-2.32193						7	2	0	1	0	-0.034	24.4134	1.08285
YLR180W	SAM1	S-adenosylmethionine synthetase; catalyzes transfer of the adenosyl group of ATP to the sulfur atom of methionine; SAM1 has a paralog, SAM2, that arose from the whole genome duplication	III	3.30743	3.10434	2.53605	1.43296	1.20163	-2.32193				II		6	5	0	1	0		558.609	24.7769
YGL123W	RPS2	Protein component of the small (40S) subunit; essential for control of translational accuracy; phosphorylation by C-terminal domain kinase I (CTDK-I) enhances translational accuracy; methylated on one or more arginine residues by Hmt1p; homologous to mammalian ribosomal protein S2 and bacterial S5	III	5.36807	4.09592	2.82782	-0.321928	-3.32193				IV	III	III	7	9	0	0	1		4878.04	216.364
YDR320C-A	DAD4	Essential subunit of the Dam1 complex (aka DASH complex); complex couples kinetochores to the force produced by MT depolymerization thereby aiding in chromosome segregation; is transferred to the kinetochore prior to mitosis	III	3.66676	3	1.96347	0.678072	-0.321928	-1.32193	-3.32193					2	6	0	0	0	-0.387	84.0235	3.72683
YIL095W	PRK1	Protein serine/threonine kinase; regulates the organization and function of the actin cytoskeleton and reduces endocytic ability of cell through the phosphorylation of the Pan1p-Sla1p-End3p protein complex; PRK1 has a paralog, ARK1, that arose from the whole genome duplication	III	3.27799	2.58496	2.32193	1.72247	0.263034	-3.32193	-3.32193	-0.152003				3	7	0	0	1		17.3575	0.769888
YPR067W	ISA2	Protein required for maturation of mitochondrial [4Fe-4S] proteins; functions in a complex with Isa1p and possibly Iba57p; localizes to the mitochondrial intermembrane space, overexpression of ISA2 suppresses grx5 mutations	III	3.33628	2.74416	2.74416	1.72247					II		III	6	5	1	1	0	-0.179	44.3688	1.96796
YNR051C	BRE5	Ubiquitin protease cofactor; forms deubiquitination complex with Ubp3p that coregulates anterograde and retrograde transport between the endoplasmic reticulum and Golgi compartments; null is sensitive to brefeldin A	III	3.20163	2.98185	1.67807	-0.152003					IV		III	6	7	1	0	0	0.185	103.695	4.59938
YOR046C	DBP5	Cytoplasmic ATP-dependent RNA helicase of the DEAD-box family; involved in mRNA export from the nucleus, remodeling messenger ribonucleoprotein particles (mRNPs), with ATPase activity stimulated by Gle1p, IP6 and Nup159p; involved in translation termination along with Sup45p (eRF1); role in the cellular response to heat stress	III	3.76553	2.23266	1.848					-3.32193				6	2	0	0	0		215.442	9.55584
YHR049W	FSH1	Putative serine hydrolase; localizes to both the nucleus and cytoplasm; sequence is similar to S. cerevisiae Fsh2p and Fsh3p and the human candidate tumor suppressor OVCA2	III	3.8679	2.3505	2.16993	0.765535						IV	III	7	6	1	0	1	0.5	179.402	7.95732
YDR152W	GIR2	Highly-acidic RWD domain-containing protein of unknown function; cytoplasmic; forms a complex with Rbg2p; interacts with Rbg1p and Gcn1p; associates with translating ribosomes; putative intrinsically unstructured protein	III	3.56072	2.29278	1.53605	0.137504	-0.514573	-1.73697					III	4	7	3	0	1	0.043	141.275	6.2662
YDR233C	RTN1	Reticulon protein; stabilizes membrane curvature; involved in nuclear pore assembly and maintenance of tubular ER morphology; mutant overexpressing RTN1 shows increase in tubular ER; interacts with exocyst subunit Sec6p, Yip3p, and Sbh1p; more abundant than Rtn2p; member of the RTNLA subfamily; mutants have reduced phosphatidylserine transfer between the ER and mitochondria; RTN1 has a paralog, R…	III	3.12101	2.58496	1.72247	0.137504	-0.152003					IV	III	3	12	0	0	0		421.916	18.7139
YGR192C	TDH3	Glyceraldehyde-3-phosphate dehydrogenase (GAPDH), isozyme 3; involved in glycolysis and gluconeogenesis; tetramer that catalyzes the reaction of glyceraldehyde-3-phosphate to 1,3 bis-phosphoglycerate; detected in the cytoplasm and cell wall; GAPDH-derived antimicrobial peptides secreted by S. cerevisiae are active against a wide variety of wine-related yeasts and bacteria; binds AU-rich RNA	III	3.58496	2.26303	1.1375	0.847997	0.137504	-3.32193			IV	IV	III	5	4	0	0	0		14607.9	647.928
YLR027C	AAT2	Cytosolic aspartate aminotransferase involved in nitrogen metabolism; localizes to peroxisomes in oleate-grown cells	III	2.53605	2.16993	1.43296	0.765535	-3.32193	-3.32193	-3.32193	-0.736966				6	6	0	0	0		338.131	14.9977
YER114C	BOI2	Protein implicated in polar growth, functionally redundant with Boi1p; interacts with bud-emergence protein Bem1p; contains an SH3 (src homology 3) domain and a PH (pleckstrin homology) domain; BOI2 has a paralog, BOI1, that arose from the whole genome duplication	III	4.26303	2.07039	1.926	0.137504	-1						III	6	12	0	0	1	-0.001	43.4784	1.92847
YNL169C	PSD1	Phosphatidylserine decarboxylase of the mitochondrial inner membrane; converts phosphatidylserine to phosphatidylethanolamine; regulates mitochondrial fusion and morphology by affecting lipid mixing in the mitochondrial membrane and by influencing the ratio of long to short forms of Mgm1p; partly exposed to the mitochondrial intermembrane space; autocatalytically processed	III	3.43296	3.36457	2.96347	0.378512								5	8	1	0	1	0.017	39.3201	1.74403
YLR392C	ART1	Protein of unknown function that contains 2 PY motifs; ubiquinated by Rsp5p; overexpression confers resistance to arsenite; green fluorescent protein (GFP)-fusion protein localizes it to the cytoplasm; non-essential gene	III	4.41278	2.88753	2.16993	1.26303	-0.152003	-3.32193		-3.32193				5	5	0	0	0	-0.218	13.654	0.605618
YPR017C	DSS4	Guanine nucleotide dissociation stimulator for Sec4p; functions in the post-Golgi secretory pathway; binds zinc, found both on membranes and in the cytosol	III	2.26303	2.16993	1.76554	1.63227	-1.73697			-1.32193			II	4	5	0	0	1	0.26	32.4724	1.4403
YGR012W		Putative cysteine synthase; localized to the mitochondrial outer membrane	III	3.03562	2.96347	1.96347									6	5	0	0	0	0.133	36.4015	1.61458
YMR186W	HSC82	Cytoplasmic chaperone of the Hsp90 family; plays a role in determining prion variants; redundant in function and nearly identical with Hsp82p, and together they are essential; expressed constitutively at 10-fold higher basal levels than HSP82 and induced 2-3 fold by heat shock; contains two acid-rich unstructured regions that promote the solubility of chaperone-substrate complexes; HSC82 has a pa…	III	4.0268	2.82782	1.96347	0.485427	-1.73697	-3.32193						11	8	0	0	1		2027.78	89.9417
YOR296W		Putative protein of unknown function; green fluorescent protein (GFP)-fusion protein localizes to the cytoplasm; expressed during copper starvation; YOR296W is not an essential gene	III	4.62059	2.60881	2.03562	1.848	-2.32193			-3.32193			III	4	4	0	0	0	0.011	16.58	0.7354
YHR011W	DIA4	Probable mitochondrial seryl-tRNA synthetase; mutant displays increased invasive and pseudohyphal growth	III	3.7115	2.43296	1.96347	0.584963	-2.32193				II	III	III	3	6	1	0	1	-0.08	12.0118	0.532778
YMR225C	MRPL44	Mitochondrial ribosomal protein of the large subunit; protein abundance increases in response to DNA replication stress	III	3.64386	2.60881	2.29278	2.23266	-1				I		II	2	7	1	0	0	-0.033	33.7441	1.49671
YBL047C	EDE1	Scaffold protein involved in the formation of early endocytic sites; putative regulator of cytokinesis; homo-oligomerization is required for localization to and organization of endocytic sites; has a network of interactions with other endocytic proteins; binds membranes in a ubiquitin-dependent manner; may also bind ubiquitinated membrane-associated proteins; interacts with Cmk2 and functions ups…	III	4.34341	3.08746	2.74416	2.48543		-3.32193				III	III	12	8	0	1	0	-0.606	109.683	4.86496
YHL023C	NPR3	Subunit of the Iml1p/SEACIT complex; SEACIT (Iml1p-Npr2p-Npr3p) is a subcomplex of SEAC, a coatomer-related complex that associates dynamically with the vacuole; Npr3p may have a structural or regulatory role, supporting Iml1p function as a GAP for the Rag family GTPase Gtr1p, and leading to inhibition of TORC1 signaling in response to amino acid deprivation; SEACIT is required for non-nitrogen-s…	III	4.26303	3.37851	1.63227	-0.152003				-1.73697		IV	II	7	7	1	0	0	0.522	19.9168	0.883404
YKR067W	GPT2	Glycerol-3-phosphate/dihydroxyacetone phosphate sn-1 acyltransferase; located in lipid particles and the ER; involved in the stepwise acylation of glycerol-3-phosphate and dihydroxyacetone in lipid biosynthesis; the most conserved motifs and functionally relevant residues are oriented towards the ER lumen	III	3.3505	2.7866	1.26303	0.678072					III	IV		6	9	1	0	1	-0.131	16.8853	0.748942
YPR072W	NOT5	Subunit of CCR4-NOT global transcriptional regulator; involved intranscription initiation and elongation and in mRNA degradation; conserved lysine in human homolog of Not5p and Not3p is mutated in cancers	III	3.20163	3	2.1375	0.485427	-0.321928	-1.73697	-1.73697	-2.32193			III	5	6	0	0	0	0.121	91.1741	4.044
YDR353W	TRR1	Cytoplasmic thioredoxin reductase; key regulatory enzyme that determines the redox state of the thioredoxin system, which acts as a disulfide reductase system and protects cells against both oxidative and reductive stress; protein abundance increases in response to DNA replication stress; TRR1 has a paralog, TRR2, that arose from the whole genome duplication	III	2.96347	2.63227	0.584963	0.263034	-1.32193					II		2	2	0	0	1		473.535	21.0035
YPL043W	NOP4	Nucleolar protein; essential for processing and maturation of 27S pre-rRNA and large ribosomal subunit biogenesis; constituent of 66S pre-ribosomal particles; contains four RNA recognition motifs (RRMs)	III	2.82782	2.48543	1.37851	-0.152003	-1	-3.32193				I		10	2	0	1	1	0.229	112.247	4.97866
YHR215W	PHO12	One of three repressible acid phosphatases; glycoprotein that is transported to the cell surface by the secretory pathway; pregulated by phosphate starvation; PHO12 has a paralog, PHO11, that arose from a segmental duplication	III	4.07039	3.26303	2.40599	1.96347	-0.152003	-1.73697	-3.32193	-1.32193				3	4	0	0	1		16.3316	0.724384
YDR100W	TVP15	Integral membrane protein; localized to late Golgi vesicles along with the v-SNARE Tlg2p	III	2.32193	2.29278	2	0.678072	-3.32193			-0.514573			III	3	8	1	0	1	-0.141	59.5796	2.64263
YDR363W-A	SEM1	Component of lid subcomplex of 26S proteasome regulatory subunit; involved in mRNA export mediated by TREX-2 complex (Sac3p-Thp1p); assumes different conformations in different contexts, functions as molecular glue stabilizing the Rpn3p/Rpn7p regulatory heterodimer, and tethers it to lid helical bundle; ortholog of human DSS1; protein abundance increases in response to DNA replication stress	III	3.43296	2.32193	2.07039	-0.514573	-1.73697	-3.32193	-3.32193	0.137504		IV	II	6	7	0	0	0	0.08	203.671	9.03375
YNL047C	SLM2	Phosphoinositide PI4,5P(2) binding protein, forms a complex with Slm1p; acts downstream of Mss4p in a pathway regulating actin cytoskeleton organization in response to stress; phosphorylated by the TORC2 complex; SLM2 has a paralog, SLM1, that arose from the whole genome duplication	III	4.05311	3.40599	2.70044	-0.736966	-1.32193						III	6	9	0	0	1	0.226	17.0401	0.75581
YER126C	NSA2	Protein constituent of 66S pre-ribosomal particles; contributes to processing of the 27S pre-rRNA	III	4.01792	2.926	2.23266	0.847997	-0.736966					II		13	4	1	1	0	0.014	220.822	9.7945
YHR170W	NMD3	Protein involved in nuclear export of the large ribosomal subunit; acts as a Crm1p-dependent adapter protein for export of nascent ribosomal subunits through the nuclear pore complex	III	3.89724	3.24793	1.88752	0.137504	-1.32193	-1.32193	-1.32193			III	III	13	2	0	1	0		245.531	10.8904
YOR073W	SGO1	Component of the spindle checkpoint; involved in sensing lack of tension on mitotic chromosomes; protects centromeric Rec8p at meiosis I; required for accurate chromosomal segregation at meiosis II and for mitotic chromosome stability; recruits condensin to the pericentric region of chromosomes during meiosis; dissociates from pericentromeres when sister kinetochores are under tension	III	3.44626	3.39232	2.82782	0.485427	0.485427	-2.32193						4	2	1	1	0	0.002	22.104	0.980413
YDR399W	HPT1	Dimeric hypoxanthine-guanine phosphoribosyltransferase; catalyzes the transfer of the phosphoribosyl portion of 5-phosphoribosyl-alpha-1-pyrophosphate to a purine base (either guanine or hypoxanthine) to form pyrophosphate and a purine nucleotide (either guanosine monophosphate or inosine monophosphate); mutations in the human homolog HPRT1 can cause Lesch-Nyhan syndrome and Kelley-Seegmiller syn…	III	4.50462	3.39232	2.96347	0.678072	-1.32193	-1.32193				II	III	9	6	0	1	0		337.196	14.9562
YDL137W	ARF2	ADP-ribosylation factor; GTPase of the Ras superfamily involved in regulation of coated formation vesicles in intracellular trafficking within the Golgi; ARF2 has a paralog, ARF1, that arose from the whole genome duplication	III	3.39232	2.56072	1.88752	0.847997								5	8	0	0	0		299.432	13.2812
YPL146C	NOP53	Nucleolar protein; involved in biogenesis of the 60S subunit of the ribosome; interacts with rRNA processing factors Cbf5p and Nop2p and with the nucleolar proteins Nop17p and Nip7p; null mutant is viable but growth is severely impaired	III	3.30743	2.926	1.72247	-0.736966	-2.32193					I		11	7	0	0	0	0.206	111.782	4.95806
YLR212C	TUB4	Gamma-tubulin; involved in nucleating microtubules from both the cytoplasmic and nuclear faces of the spindle pole body; protein abundance increases in response to DNA replication stress	III	3.7866	3.03562	2.1375	1.96347	-1	-2.32193	-3.32193	-3.32193			II	8	6	0	0	0	-0.137	28.9199	1.28273
YDR311W	TFB1	Subunit of TFIIH and nucleotide excision repair factor 3 complexes; required for nucleotide excision repair, target for transcriptional activators; relocalizes to the cytosol in response to hypoxia	III	3.79701	2.63227	2.29278								IV	7	5	0	0	0	0.04	33.2534	1.47494
YNL072W	RNH21	Ribonuclease H2 catalytic subunit; removes RNA primers during Okazaki fragment synthesis and errant ribonucleotides misincorporated during DNA replication; role in ribonucleotide excision repair; homolog of RNAse HI; related to human AGS4 which causes Aicardi-Goutieres syndrome	III	3.88753	2.53605	2.3505	1.80736	-2.32193	-3.32193						4	7	0	0	1	-0.126	23.5857	1.04614
YCR034W	ELO2	Fatty acid elongase, involved in sphingolipid biosynthesis; acts on fatty acids of up to 24 carbons in length; mutations have regulatory effects on 1,3-beta-glucan synthase, vacuolar ATPase, and the secretory pathway; ELO2 has a paralog, ELO1, that arose from the whole genome duplication	III	3.7866	3.12101	1	-0.321928	-3.32193	-3.32193					III	9	6	0	0	0	0.273	197.013	8.73843
YMR006C	PLB2	Phospholipase B (lysophospholipase) involved in lipid metabolism; displays transacylase activity in vitro; overproduction confers resistance to lysophosphatidylcholine	III	3.43296	3.26303	2.3505	0.485427	-1.32193	-3.32193						4	4	0	0	1	-0.42	80.693	3.57911
YLR052W	IES3	Subunit of the INO80 chromatin remodeling complex	III	4.49185	3.32193	1.67807	1.20163	1	-2.32193		-1.32193			III	2	2	0	0	0	-0.108	59.5493	2.64129
YOR064C	YNG1	Subunit of the NuA3 histone acetyltransferase complex; this complex acetylates histone H3; contains PHD finger domain that interacts with methylated histone H3; shares significant sequence identity with the human candidate tumor suppressor p33-ING1 in C-terminal region	III	4.43296	3.89724	2.848	2.29278	-1	-1.73697	-3.32193	-3.32193	III			1	7	0	0	0	0.247	14.6741	0.650863
YGR118W	RPS23A	Ribosomal protein 28 (rp28) of the small (40S) ribosomal subunit; required for translational accuracy; homologous to mammalian ribosomal protein S23 and bacterial S12; RPS23A has a paralog, RPS23B, that arose from the whole genome duplication; deletion of both RPS23A and RPS23B is lethal	III	3.7866	2.98185	1.58496	1.26303	-1	-2.32193						6	5	0	1	0		668.267	29.6408
YDR277C	MTH1	Negative regulator of the glucose-sensing signal transduction pathway; required for repression of transcription by Rgt1p; interacts with Rgt1p and the Snf3p and Rgt2p glucose sensors; phosphorylated by Yck1p, triggering Mth1p degradation; MTH1 has a paralog, STD1, that arose from the whole genome duplication	III	3.3505	2.56072	2.53605	2.26303	-1.32193	-1.73697					IV	5	8	0	0	1		11.0891	0.491853
YKR035W-A	DID2	Class E protein of the vacuolar protein-sorting (Vps) pathway; binds Vps4p and directs it to dissociate ESCRT-III complexes; forms a functional and physical complex with Ist1p; human ortholog may be altered in breast tumors	III	3.15381	2.40599	1.67807	0.378512	-2.32193	-3.32193				I		10	5	1	1	0	0.17	74.9988	3.32655
YER095W	RAD51	Strand exchange protein; forms a helical filament with DNA that searches for homology; involved in the recombinational repair of double-strand breaks in DNA during vegetative growth and meiosis; homolog of Dmc1p and bacterial RecA protein	III	3.51096	2.58496	2.10434	1	-0.514573	-3.32193	-3.32193					7	4	0	0	0	-0.2	32.088	1.42325
YNL064C	YDJ1	Type I HSP40 co-chaperone; involved in regulation of HSP90 and HSP70 functions; acts as an adaptor that helps Rsp5p recognize cytosolic misfolded proteins for ubiquitylation after heat shock; critical for determining cell size at Start as a function of growth rate; involved in protein translocation across membranes; member of the DnaJ family	III	2.8679	1.88752	1.76554	1.48543	-3.32193					II	IV	9	9	1	0	0		483.939	21.4649
YDR420W	HKR1	Mucin family member that functions as an osmosensor in the HOG pathway; functions in the Sho1p-mediated HOG pathway with Msb2p; proposed to be a negative regulator of filamentous growth; mutant displays defects in beta-1,3 glucan synthesis and bud site selection	III	3.52356	2.29278	2.10434	-0.736966	-2.32193	-2.32193	-3.32193					5	5	0	0	1	0.287	19.6344	0.870877
YGL003C	CDH1	Activator of anaphase-promoting complex/cyclosome (APC/C); cell-cycle regulated; directs ubiquitination of cyclins resulting in mitotic exit; targets the APC/C to specific substrates including Cdc20p, Ase1p, Cin8p and Fin1p	III	4.19377	3.90689	2.88753	1	-0.736966	-3.32193						6	5	0	0	0	-0.176	21.7917	0.966562
YNR052C	POP2	RNase of the DEDD superfamily; subunit of the Ccr4-Not complex that mediates 3' to 5' mRNA deadenylation	III	4.20945	3.24793	2.7866	2.20163	-3.32193	-3.32193	-3.32193			III	III	8	7	0	1	0	0.075	53.4285	2.3698
YAL009W	SPO7	Putative regulatory subunit of Nem1p-Spo7p phosphatase holoenzyme; regulates nuclear growth by controlling phospholipid biosynthesis, required for normal nuclear envelope morphology, premeiotic replication, and sporulation	III	3.58496	3.23266	3.16993	1.63227	-1	-3.32193	-3.32193				III	3	7	0	0	0	0.064	21.6109	0.958546
YDR226W	ADK1	Adenylate kinase, required for purine metabolism; localized to the cytoplasm and the mitochondria; lacks cleavable signal sequence; protein abundance increases in response to DNA replication stress	III	2.48543	2.20163	2.03562	1.80736	1.58496	-3.32193						4	4	0	0	0		966.528	42.87
YMR229C	RRP5	RNA binding protein involved in synthesis of both 18S and 5.8S rRNAs; component of both the ribosomal small subunit (SSU) processosome and the 90S preribosome; acts as part of a Mak21p-Noc2p-Rrp5p module that associates with nascent pre-rRNA during transcription and has a role in bigenesis of the large ribosomal subunit; has binding preference for single stranded tracts of U's; relocalizes from n…	III	5.05745	4.37851	2.23266	0.847997	-1.73697	-2.32193	-2.32193			I	III	11	7	0	0	0	-0.389	303.005	13.4397
YJL136C	RPS21B	Protein component of the small (40S) ribosomal subunit; homologous to mammalian ribosomal protein S21, no bacterial homolog; RPS21B has a paralog, RPS21A, that arose from the whole genome duplication	IV	2.45943	2.10434	0.925999	-0.736966	-1.32193	-1.32193	-2.32193	-3.32193				4	5	0	0	0		780.486	34.6182
YCR030C	SYP1	Negative regulator of WASP-Arp23 complex; involved in endocytic site formation; directly inhibits Las17p stimulation of Arp23 complex-mediated actin assembly in vitro; may regulate assembly and disassembly of the septin ring; colocalizes and interacts with septin subunits; potential role in actin cytoskeletal organization	IV	0.925999	0.925999	0.263034	0.263034	0.263034					III		10	6	0	1	0	-0.206	23.4171	1.03866
YDR097C	MSH6	Protein required for mismatch repair in mitosis and meiosis; forms a complex with Msh2p to repair both single-base & insertion-deletion mispairs; also involved in interstrand cross-link repair; potentially phosphorylated by Cdc28p	IV	3.16993	2.16993	0.678072	-1	-1				III	IV	III	3	6	0	0	0	-0.384	37.2878	1.65389
YDL019C	OSH2	Member of an oxysterol-binding protein family with seven members; in S. cerevisiae, family members have overlapping, redundant functions in sterol metabolism and collectively perform a function essential for viability; contains FFAT motif; interacts with ER anchor Scs2p at patches at the plasma membrane and at the nuclear envelope; regulated by sterol binding; OSH2 has a paralog, SWH1, that arose…	IV	2.3505	2.26303	-1	-2.32193						III	III	8	8	0	2	0	0.172	29.298	1.2995
YGR086C	PIL1	Eisosome core component; eisosomes are large immobile cell cortex structures associated with endocytosis; detected in phosphorylated state in mitochondria; phosphorylated on Thr233 upon Pkc1p hyperactivation in a Slt2p MAPK-dependent fashion; null mutant shows activation of Pkc1p/Ypk1p stress resistance pathways; member of BAR domain family; protein increases in abundance and relocalizes from pla…	IV	2.72247	1.76554	-0.736966	-1.73697	-1.73697	-1.73697	-1.73697					2	6	0	0	0		385.998	17.1208
YGR162W	TIF4631	Translation initiation factor eIF4G; subunit of the mRNA cap-binding protein complex (eIF4F) that also contains eIF4E (Cdc33p); interacts with Pab1p and with eIF4A (Tif1p); also has a role in biogenesis of the large ribosomal subunit; TIF4631 has a paralog, TIF4632, that arose from the whole genome duplication	IV	1.926	1.48543	1.43296	1	-2.32193	-3.32193	-3.32193			III		7	2	0	0	0	-0.451	396.495	17.5864
YNL189W	SRP1	Karyopherin alpha homolog; forms a dimer with karyopherin beta Kap95p to mediate import of nuclear proteins, binds the nuclear localization signal of the substrate during import; involved in cotranslational protein degradation; binds ribosome-bound nascent polypeptides; Srp1p and Sts1p couple proteasomes to nascent polypeptides emerging from the ribosome for cotranslational degradation	IV	2.43296	1.26303	0.925999	-0.152003	-0.514573	-3.32193						3	4	1	0	0	0.301	210.865	9.35284
YBR205W	KTR3	Putative alpha-1,2-mannosyltransferase; involved in O- and N-linked protein glycosylation; member of the KRE2/MNT1 mannosyltransferase family; Svp26p mediates uptake of Ktr3p into COPII vesicles; relocalizes from nucleus to vacuole upon DNA replication stress	IV	2.32193	1.848	-0.321928	-1.32193							III	6	6	2	0	0	0.401	92.7234	4.11271
YOR197W	MCA1	Ca2+-dependent cysteine protease; may cleave specific substrates during the stress response; regulates apoptosis upon H2O2 treatment; required for clearance of insoluble protein aggregates during normal growth; implicated in cell cycle dynamics and lifespan extension; undergoes autocatalytic processing; similar to mammalian metacaspases, but exists as a monomer due to an extra pair of anti-parall…	IV	3.15381	0.678072	-0.514573	-0.514573								6	5	0	0	0	-0.166	191.131	8.47757
YMR202W	ERG2	C-8 sterol isomerase; catalyzes isomerization of delta-8 double bond to delta-7 position at an intermediate step in ergosterol biosynthesis; transcriptionally down-regulated when ergosterol is in excess	IV	1.1375	0.678072	-0.514573	-1	-1.32193							6	5	0	0	0		383.509	17.0104
YLR036C		Putative protein predicted to have transmembrane domains; interacts with HSP90 by yeast two-hybrid analysis; YLR036C is not an essential protein	IV	1.53605	0.925999	0.925999	-1.73697	-1.73697							1	1	0	0	0	0.22	20.2831	0.89965
YML009W-B		Dubious open reading frame; unlikely to encode a functional protein, based on available experimental and comparative sequence data; deletion mutation confers an increase in Ty1 transposition	IV	1.80736	1.07039	0.678072	0.485427	-1.32193	-3.32193	-3.32193					#N/A	#N/A	0	0	0		3.6376	0.161345
YLR172C	DPH5	Methyltransferase required for synthesis of diphthamide; diphthamide is a modified histidine residue of translation elongation factor 2 (Eft1p or Eft2p); not essential for viability; GFP-Dph5p fusion protein localizes to the cytoplasm	IV	2.56072	1.76554	1.37851	-1	-1.73697	-1.73697				III		6	6	0	0	0	0.061	221.536	9.82616
YOL077C	BRX1	Nucleolar protein; constituent of 66S pre-ribosomal particles; depletion leads to defects in rRNA processing and a block in the assembly of large ribosomal subunits; possesses a sigma(70)-like RNA-binding motif	IV	2.29278	1.67807	1.07039	-0.514573	-1.73697					I		12	7	1	1	1		314.827	13.964
YDL136W	RPL35B	Ribosomal 60S subunit protein L35B; homologous to mammalian ribosomal protein L35 and bacterial L29; RPL35B has a paralog, RPL35A, that arose from the whole genome duplication	IV	2	1.48543									III	2	6	0	0	0		165.287	7.33125
YEL031W	SPF1	P-type ATPase, ion transporter of the ER membrane; required to maintain normal lipid composition of intracellular compartments and proper targeting of mitochondrial outer membrane tail-anchored proteins; involved in ER function and Ca2+ homeostasis; required for regulating Hmg2p degradation; confers sensitivity to a killer toxin (SMKT) produced by Pichia farinosa KK1	IV	2.48543	0.925999	0.263034	-0.321928	-0.736966	-1.73697	-2.32193				III	6	7	1	0	1	0.444	276.195	12.2505
YHR007C	ERG11	Lanosterol 14-alpha-demethylase; catalyzes C-14 demethylation of lanosterol to form 4,4''-dimethyl cholesta-8,14,24-triene-3-beta-ol in ergosterol biosynthesis pathway; transcriptionally down-regulated when ergosterol is in excess; member of cytochrome P450 family; associated and coordinately regulated with the P450 reductase Ncp1p	IV	2.56072	2.07039	1.07039	0.378512	-0.321928	-1.73697	-3.32193					5	4	0	0	0		484.133	21.4736
YHR142W	CHS7	Protein of unknown function; may be involved in chitin biosynthesis by regulation of Chs3p export from the ER; relocalizes from bud neck to ER upon DNA replication stress	IV	1.26303	1.1375	1.07039							IV		6	6	0	1	0	-0.173	62.329	2.76458
YBR211C	AME1	Essential kinetochore protein associated with microtubules and SPBs; component of the kinetochore sub-complex COMA (Ctf19p, Okp1p, Mcm21p, Ame1p); involved in spindle checkpoint maintenance; orthologous to human centromere constitutive-associated network (CCAN) subunit CENP-U and fission yeast Mis17; relative distribution to the nucleus increases upon DNA replication stress	IV	1.37851	1	0.765535	0.137504	-0.514573	-2.32193	-3.32193					6	3	3	0	1	0.293	20.5963	0.913544
YDL112W	TRM3	2'-O-ribose methyltransferase; catalyzes the ribose methylation of the guanosine nucleotide at position 18 of tRNAs	IV	2.848	1.58496	1.32193	0.378512	-3.32193	-3.32193				III		10	6	0	1	0	-0.196	81.2863	3.60543
YCR035C	RRP43	Exosome non-catalytic core component; involved in 3'-5' RNA processing and degradation in both the nucleus and the cytoplasm; has similarity to E. coli RNase PH and to human hRrp43p (OIP2, EXOSC8); protein abundance increases in response to DNA replication stress	IV	2.53605	2	1.1375	-0.514573	-0.736966	-2.32193	-2.32193			III		7	6	0	1	0	0.037	80.354	3.56408
YER092W	IES5	Non-essential INO80 chromatin remodeling complex subunit; deletion affects telomere maintenance via recombination	IV	1.58496	1.1375										3	3	0	1	1	-0.95	50.8026	2.25333
YHR162W	MPC2	Highly conserved subunit of the mitochondrial pyruvate carrier; a mitochondrial inner membrane complex comprised of Mpc1p and either Mpc2p or Mpc3p mediates mitochondrial pyruvate uptake; more highly expressed in glucose-containing minimal medium than in lactate-containing medium; MPC2 has a paralog, FMP43, that arose from the whole genome duplication	IV	3.32193	2.1375	1.26303	-1.73697								10	5	0	1	0		477.918	21.1979
YGR204W	ADE3	Cytoplasmic trifunctional enzyme C1-tetrahydrofolate synthase; involved in single carbon metabolism and required for biosynthesis of purines, thymidylate, methionine, and histidine; null mutation causes auxotrophy for adenine and histidine	IV	0.584963	0.137504		-0.321928	-0.514573	-0.736966				III		10	4	0	1	0		202.689	8.99021
YBL087C	RPL23A	Ribosomal 60S subunit protein L23A; homologous to mammalian ribosomal protein L23 and bacterial L14; RPL23A has a paralog, RPL23B, that arose from the whole genome duplication	IV	2.20163	1.80736	0.584963	-0.321928								3	8	0	0	0		706.446	31.3342
YKL048C	ELM1	Serine/threonine protein kinase that regulates cellular morphogenesis; septin behavior, and cytokinesis; required for the regulation of other kinases, such as Kin4p; forms part of the bud neck ring	IV	1.63227	0.584963	0.378512	-0.152003	-3.32193							4	5	0	0	1	-0.016	18.2119	0.807782
YGL076C	RPL7A	Ribosomal 60S subunit protein L7A; required for processing of 27SA3 pre-rRNA to 27SB pre-rRNA during assembly of large ribosomal subunit; depletion leads to a turnover of pre-rRNA; contains a conserved C-terminal Nucleic acid Binding Domain (NDB2); binds to Domain II of 25S and 5.8S rRNAs; homologous to mammalian ribosomal protein L7 and bacterial L30; RPL7A has a paralog, RPL7B, that arose from …	IV	3.98185	2.82782	2.1375	-3.32193						IV	III	8	7	0	0	1		344.841	15.2953
YGL145W	TIP2	Peripheral membrane protein required for COPI vesicle fusion to the ER; mediates Sey1p-independent homotypic ER fusion; prohibits back-fusion of COPII vesicles with the ER; forms a tethering complex with Sec39p and Dsl1p that interacts with ER SNAREs Sec20p and Use1p	IV	2.67807	-0.152003	-0.152003	-0.514573	-3.32193					IV		5	5	0	0	0	-0.005	27.2439	1.20839
YHR089C	GAR1	Protein component of the H/ACA snoRNP pseudouridylase complex; involved in the modification and cleavage of the 18S pre-rRNA	IV	2.23266	1.58496	1.20163	0.584963		-1.73697				I		9	2	0	1	0		246.187	10.9196
YHR070W	TRM5	tRNA(m(1)G37)methyltransferase; methylates a tRNA base adjacent to the anticodon that has a role in prevention of frameshifting; highly conserved across Archaea, Bacteria, and Eukarya	IV	1.1375	0.378512	0.137504									8	2	0	0	0	0.026	51.2695	2.27404
YOR168W	GLN4	Glutamine tRNA synthetase; monomeric class I tRNA synthetase that catalyzes the specific glutaminylation of tRNA(Gln); N-terminal domain proposed to be involved in enzyme-tRNA interactions	IV	1.848	1.32193	0.678072	0.137504	-0.321928	-2.32193	-3.32193					10	6	1	0	0	-0.041	379.033	16.8119
YOR004W	UTP23	Component of the small subunit processome; involved in 40S ribosomal subunit biogenesis; interacts with snR30 and is required for dissociation of snR30 from large pre-ribosomal particles; has homology to PINc domain protein Fcf1p, although the PINc domain of Utp23p is not required for function; essential protein	IV	3.39232	0.925999		-0.321928	-3.32193	-3.32193			III	III		9	5	1	0	0	0.269	105.629	4.68512
YMR076C	PDS5	Cohesion maintenance factor; involved in sister chromatid condensation and cohesion; colocalizes with cohesin on chromosomes; performs its cohesin maintenance function in pre-anaphase cells by protecting the integrity of the cohesion complex; also required during meiosis; relocalizes to the cytosol in response to hypoxia	IV	3.52356	0.485427								III	II	8	7	1	0	0	-0.021	27.3381	1.21257
YDR351W	SBE2	Protein required for bud growth; involved in transport of cell wall components from the Golgi to the cell surface; SBE2 has a paralog, SBE22, that arose from the whole genome duplication	IV	1.20163	1.1375	0.485427	-1.32193	-1.32193	-1.32193						2	2	0	0	0	-0.199	33.0865	1.46754
YPR009W	SUT2	Putative transcription factor of the Zn2Cys6 family; regulates sterol uptake under anaerobic conditions along with SUT1; multicopy suppressor of mutations that cause low activity of the cAMP/protein kinase A pathway; positively regulates mating along with SUT1 by repressing the expression of genes (PRR2, NCE102 and RHO5) which function as mating inhibitors; SUT2 has a paralog, SUT1, that arose fr…	IV	2.7866	2.60881	-0.736966									8	8	0	1	0	0.626	43.3172	1.92132
YJL208C	NUC1	Major mitochondrial nuclease; has RNAse and DNA endo- and exonucleolytic activities; roles in mitochondrial recombination, apoptosis and maintenance of polyploidy; involved in fragmentation of genomic DNA during PND (programmed nuclear destruction); encodes ortholog of mammalian endoG	IV	1.67807	1.20163		-1.32193					II			6	7	1	0	1	0.046	59.7199	2.64886
YOL110W	SHR5	Palmitoyltransferase subunit; this complex adds a palmitoyl lipid moiety to heterolipidated substrates such as Ras1p and Ras2p through a thioester linkage; palmitoylation is required for Ras2p membrane localization; Palmitoyltransferase is composed of Shr5p and Erf2	IV	2.10434	0.678072										6	2	0	0	1	0.22	9.57298	0.424606
YOL152W	FRE7	Putative ferric reductase with similarity to Fre2p; expression induced by low copper levels	IV	1.43296	0.378512	0.263034						III			5	7	1	0	0		1.94066	0.0860772
YGR061C	ADE6	Formylglycinamidine-ribonucleotide (FGAM)-synthetase; catalyzes a step in the 'de novo' purine nucleotide biosynthetic pathway	IV	2.07039	1.63227	-0.736966							II		12	10	0	0	0		241.986	10.7332
YER023W	PRO3	Delta 1-pyrroline-5-carboxylate reductase; catalyzes the last step in proline biosynthesis	IV	1.96347	1.26303	1.26303									5	9	0	0	0		313.601	13.9097
YDL084W	SUB2	Component of the TREX complex required for nuclear mRNA export; member of the DEAD-box RNA helicase superfamily and is involved in early and late steps of spliceosome assembly; homolog of the human splicing factor hUAP56; relocalizes from nucleus to cytoplasm upon DNA replication stress	IV	2.10434	1.37851	1.07039	-0.736966								4	8	0	0	0		739.762	32.8119
YBL017C	PEP1	Type I transmembrane sorting receptor for multiple vacuolar hydrolases; cycles between the late-Golgi and prevacuolar endosome-like compartments	IV	3.47249	1.926	0.584963	-0.152003	-0.514573	-1	-3.32193	-3.32193			III	7	3	0	0	0	-0.412	75.4171	3.3451
YOR094W	ARF3	Glucose-repressible ADP-ribosylation factor; GTPase of the Ras superfamily involved in regulating cell polarity and invasive growth; also has mRNA binding activity	IV	2.76553	2.40599	2.29278	-1.73697								4	8	0	1	0	-0.093	24.3457	1.07984
YLL024C	SSA2	ATP-binding protein; involved in protein folding and vacuolar import of proteins; member of heat shock protein 70 (HSP70) family; associated with the chaperonin-containing T-complex; present in the cytoplasm, vacuolar membrane and cell wall; 98% identical to paralog Ssa1p, but has distinct functional specificity in propagation of yeast [URE3] prions and vacuolar-mediated degradation of gluconeoge…	IV	2.26303	1	-0.152003	-0.514573	-3.32193	-3.32193						6	3	2	1	0		1480.67	65.6746
YPL048W	CAM1	One of two isoforms of the gamma subunit of eEF1B; stimulates the release of GDP from eEF1A (Tef1p/Tef2p) post association with the ribosomal complex with eEF1Balpha subunit; nuclear protein required for transcription of MXR1; binds the MXR1 promoter in the presence of other nuclear factors; binds calcium and phospholipids	IV	2.16993	1.20163	1	-2.32193	-2.32193	-3.32193						8	4	0	1	0		363.478	16.122
YDR347W	MRP1	Mitochondrial ribosomal protein of the small subunit; MRP1 exhibits genetic interactions with PET122, encoding a COX3-specific translational activator, and with PET123, encoding a small subunit mitochondrial ribosomal protein	IV	2.26303	1.76554	0.584963	0.485427	0.378512	-3.32193			II			5	6	2	0	1	0.388	69.4568	3.08073
YGR191W	HIP1	High-affinity histidine permease; also involved in the transport of manganese ions	IV	2.40599		-0.152003							III		7	5	0	1	0	-0.398	100.35	4.451
YKL117W	SBA1	Co-chaperone that binds and regulates Hsp90 family chaperones; plays a role in determining prion variants; important for pp60v-src activity in yeast; homologous to the mammalian p23 proteins, and like p23 can regulate telomerase activity; protein abundance increases in response to DNA replication stress	IV	2.1375	1.48543	1	0.263034	-0.321928	-1.32193						6	9	1	0	0		339.373	15.0528
YGR128C	UTP8	Nucleolar protein required for export of tRNAs from the nucleus; also copurifies with the small subunit (SSU) processome containing the U3 snoRNA that is involved in processing of pre-18S rRNA	IV	2.53605	1.848	0.378512	0.137504						III		10	2	0	1	0	-0.363	120.152	5.32931
YOR209C	NPT1	Nicotinate phosphoribosyltransferase; acts in the salvage pathway of NAD+ biosynthesis; required for silencing at rDNA and telomeres and has a role in silencing at mating-type loci; localized to the nucleus	IV	3.96347	3.75489	-0.736966	-1.32193	-1.73697	-2.32193				IV	III	8	6	1	1	1	0.491	208.706	9.25708
YKL068W-A		Putative protein of unknown function; identified by homology to <i>Ashbya gossypii</i>	IV	2.72247	0.847997	0.584963	-0.736966	-0.736966	-1.32193						0	1	0	0	0		115.164	5.10807
YJL186W	MNN5	Alpha-1,2-mannosyltransferase; responsible for addition of the second alpha-1,2-linked mannose of the branches on the mannan backbone of oligosaccharides, localizes to an early Golgi compartment	IV	2.1375	1.32193		-0.736966	-1	-3.32193				III		6	5	0	1	0	0.037	116.011	5.14563
YBR109C	CMD1	Calmodulin; Ca++ binding protein that regulates Ca++ independent processes (mitosis, bud growth, actin organization, endocytosis, etc.) and Ca++ dependent processes (stress-activated pathways), targets include Nuf1p, Myo2p and calcineurin	IV	2.51096	2.1375	0.263034		-0.514573	-0.736966					III	10	4	0	0	0		398.395	17.6707
YML104C	MDM1	PtdIns-3-P binding protein essential for organelle inheritance; required for nuclear and mitochondrial transmission to daughter buds; contains a Phox homology (PX) domain and specifically binds phosphatidylinositol 3-phosphate (PtdIns-3-P); expressed predominantly in late G1 to early S phase of the cell cycle; plays minor role in pheromone-dependent gene regulation; similar to human RGS-PX1 (also…	IV	1.53605	0.137504	-0.514573	-1.32193	-1.32193	-1.73697						3	1	0	0	0	-0.399	22.0727	0.979025
YJL190C	RPS22A	Protein component of the small (40S) ribosomal subunit; homologous to mammalian ribosomal protein S15A and bacterial S8; RPS22A has a paralog, RPS22B, that arose from the whole genome duplication	IV	1.1375	0.584963							IV			12	7	0	1	0		3780.26	167.672
YML026C	RPS18B	Protein component of the small (40S) ribosomal subunit; homologous to mammalian ribosomal protein S18 and bacterial S13; RPS18B has a paralog, RPS18A, that arose from the whole genome duplication; protein abundance increases in response to DNA replication stress	IV	3.01792	1.76554	0.847997	-0.736966	-2.32193	-2.32193	-3.32193					8	12	0	0	0		1271.62	56.4022
YGL105W	ARC1	Protein that binds tRNA and methionyl- and glutamyl-tRNA synthetases; involved in tRNA delivery, stimulating catalysis, and ensuring localization; also binds quadruplex nucleic acids; protein abundance increases in response to DNA replication stress; methionyl-tRNA synthetase is Mes1p; glutamyl-tRNA synthetase is Gus1p	IV	2.07039	1.1375	0.925999									5	6	0	0	0		690.612	30.6319
YDL061C	RPS29B	Protein component of the small (40S) ribosomal subunit; homologous to mammalian ribosomal protein S29 and bacterial S14; RPS29B has a paralog, RPS29A, that arose from the whole genome duplication	IV	3.03562	2.40599	0.378512	-1.32193								6	6	0	1	1		1776.89	78.8134
YDL045W-A	MRP1	Mitochondrial ribosomal protein of the small subunit; contains twin cysteine-x9-cysteine motifs; oxidized by Mia40p during import into mitochondria	IV	0.584963	0.584963	0.584963	0.584963					I			6	4	1	0	0	-0.487	77.0667	3.41827
YPL074W	YTA6	Putative ATPase of the CDC48/PAS1/SEC18 (AAA) family; localized to the cortex of mother cells but not to daughter cells; relocalizes from cytoplasm to plasma membrane foci upon DNA replication stress	IV	1.67807	0.584963	-0.152003	-0.152003								4	5	0	0	0	0.127	20.3765	0.903795
YPR060C	ARO7	Chorismate mutase; catalyzes the conversion of chorismate to prephenate to initiate the tyrosine/phenylalanine-specific branch of aromatic amino acid biosynthesis	IV	3.15381	1.43296	1.1375	-0.514573	-0.736966	-2.32193	-2.32193					3	8	0	0	0	0.054	111.494	4.94526
YNL119W	NCS2	Protein required for uridine thiolation of Lys(UUU) and Glu(UUC) tRNAs; required for the thiolation of uridine at the wobble position of Lys(UUU) and Glu(UUC) tRNAs; has a role in urmylation and in invasive and pseudohyphal growth; inhibits replication of Brome mosaic virus in S. cerevisiae	IV	1.07039	0.765535	0.485427	-1	-1							6	9	1	1	0	0.332	54.8368	2.43227
YML061C	PIF1	DNA helicase, potent G-quadruplex DNA binder/unwinder; possesses strand annealing activity; promotes DNA synthesis during break-induced replication; important for crossover recombination; translation from different start sites produces mitochondrial and nuclear forms; nuclear form is a catalytic inhibitor of telomerase; mitochondrial form involved in DNA repair and recombination; mutations affect…	IV	1.80736	0.765535										3	3	1	0	0	0.107	25.6741	1.13877
YBR202W	MCM7	Component of the Mcm2-7 hexameric helicase complex; MCM2-7 primes origins of DNA replication in G1 and becomes an active ATP-dependent helicase that promotes DNA melting and elongation in S-phase; forms an Mcm4p-6p-7p subcomplex	IV	0.765535	0.678072	-0.152003	-0.514573	-1.32193	-1.73697	-3.32193					8	12	0	1	1	-0.509	49.2396	2.18401
YLR287C		Putative protein of unknown function; green fluorescent protein (GFP)-fusion protein localizes to the cytoplasm; YLR287C is not an essential gene	IV	1.53605	1.43296	-1	-1	-1							5	7	0	0	0	0.341	70.9278	3.14598
YGL012W	ERG4	C-24(28) sterol reductase; catalyzes the final step in ergosterol biosynthesis; mutants are viable, but lack ergosterol	IV	2.90689	0.925999	0.584963	-0.152003	-2.32193	-3.32193						2	4	2	0	0	0.195	248.037	11.0016
YCR094W	CDC5	Endosomal protein that interacts with phospholipid flippase Drs2p; interaction with Cdc50p is essential for Drs2p catalytic activity; mutations affect cell polarity and polarized growth; similar to Lem3p; CDC50 has a paralog, YNR048W, that arose from the whole genome duplication	IV	2	1.80736	0.678072	-1.73697	-2.32193	-2.32193	-2.32193					7	4	0	1	1	-0.038	47.6582	2.11386
YOR257W	CDC31	Calcium-binding component of the spindle pole body (SPB) half-bridge; required for SPB duplication in mitosis and meiosis II; homolog of mammalian centrin; binds multiubiquitinated proteins and is involved in proteasomal protein degradation	IV	0.485427	0.137504	0.137504	-0.152003	-1	-3.32193	-3.32193	-3.32193				6	9	1	0	1	-0.834	26.9585	1.19573
YOL115W	PAP2	Non-canonical poly(A) polymerase; involved in nuclear RNA degradation as a component of TRAMP; catalyzes polyadenylation of hypomodified tRNAs, and snoRNA and rRNA precursors; required for mRNA surveillance and maintenance of genome integrity, serving as a link between RNA and DNA metabolism; overlapping but non-redundant functions with Trf5p; relocalizes to cytosol in response to hypoxia	IV	2.29278	1.76554	1.37851	0.485427	-0.736966	-2.32193	-2.32193	-2.32193				9	7	0	0	1	-0.037	45.1966	2.00468
YGR033C	TIM21	Nonessential component of the TIM23 complex; interacts with the Translocase of the Outer Mitochondrial membrane (TOM complex) and with respiratory enzymes; may regulate the Translocase of the Inner Mitochondrial membrane (TIM23 complex) activity	IV	2.03562	1.07039	-0.736966									4	5	0	1	0	0.103	84.9857	3.76951
YLR196W	PWP1	Protein with WD-40 repeats involved in rRNA processing; associates with trans-acting ribosome biogenesis factors; similar to beta-transducin superfamily	IV	1.58496	1.20163	1.1375	0.485427						I		14	5	0	1	0	0.153	176.446	7.82622
YBR200W	BEM1	Protein containing SH3-domains; involved in establishing cell polarity and morphogenesis; functions as a scaffold protein for complexes that include Cdc24p, Ste5p, Ste20p, and Rsr1p	IV	2.16993	1.53605	0.137504	-0.514573								9	4	1	0	0	-0.018	37.4116	1.65938
YGR188C	BUB1	Protein kinase involved in the cell cycle checkpoint into anaphase; in complex with Mad1p and Bub3p, prevents progression into anaphase in presence of spindle damage; Cdc28p-mediated phosphorylation at Bub1p-T566 is important for degradation in anaphase and adaptation of checkpoint to prolonged mitotic arrest; associates with centromere DNA via Skp1p; involved in Sgo1p relocalization in response …	IV	3.32193	1.53605	0.765535	-0.514573	-2.32193	-2.32193					III	7	3	0	0	1		8.27387	0.366985
YOR312C	RPL2B	Ribosomal 60S subunit protein L20B; homologous to mammalian ribosomal protein L18A, no bacterial homolog; RPL20B has a paralog, RPL20A, that arose from the whole genome duplication	IV	3.93546	2.45943	1.20163	-3.32193	-3.32193	-3.32193				III	III	8	10	0	0	1		1455.45	64.556
YFR036W	CDC26	Subunit of the Anaphase-Promoting Complex/Cyclosome (APC/C); which is a ubiquitin-protein ligase required for degradation of anaphase inhibitors, including mitotic cyclins, during the metaphase/anaphase transition; relocalizes to the cytosol in response to hypoxia	IV	3.33628	2.51096	0.378512		-0.152003	-1.32193	-3.32193					1	1	0	0	0	-1.024	24.1467	1.07102
YMR122W-A		Protein of unknown function; green fluorescent protein (GFP)-fusion protein localizes to the cytoplasm and endoplasmic reticulum	IV	2.20163	1.43296	0.847997	0.485427	-0.321928	-2.32193						4	1	0	0	0		933.058	41.3855
YJL012C	VTC4	Vacuolar membrane polyphosphate polymerase; subunit of the vacuolar transporter chaperone (VTC) complex involved in synthesis and transfer of polyP to the vacuole; regulates membrane trafficking; role in non-autophagic vacuolar fusion; protein abundance increases in response to DNA replication stress	IV	1.32193		-0.321928	-1	-1.73697							8	5	0	0	1		361.449	16.032
YJL183W	MNN11	Subunit of a Golgi mannosyltransferase complex; this complex also contains Anp1p, Mnn9p, Mnn10p, and Hoc1p, and mediates elongation of the polysaccharide mannan backbone; has homology to Mnn10p	IV	2.10434	1.1375	0.765535	-1	-1	-3.32193	-3.32193					2	7	1	0	1	0.241	111.071	4.92654
YKL154W	SRP12	Signal recognition particle (SRP) receptor beta subunit; involved in SRP-dependent protein targeting; anchors the alpha subunit, Srp101p to the ER membrane	IV	1.926	1.26303	1.07039	0.584963	-1.32193	-1.32193	-3.32193					4	1	0	0	0	-0.123	65.8155	2.91923
YDL081C	RPP1A	Ribosomal stalk protein P1 alpha; involved in the interaction between translational elongation factors and the ribosome; free (non-ribosomal) P1 stimulates the phosphorylation of the eIF2 alpha subunit (Sui2p) by Gcn2p; accumulation of P1 in the cytoplasm is regulated by phosphorylation and interaction with the P2 stalk component	IV	3.05311	1.88752	0.847997	-0.321928	-1	-1.73697						9	7	1	0	2		3670.92	162.822
YMR242C	RPL2A	Ribosomal 60S subunit protein L20A; homologous to mammalian ribosomal protein L18A, no bacterial homolog; RPL20A has a paralog, RPL20B, that arose from the whole genome duplication	IV	2.48543	1.1375	0.584963	-0.152003	-0.152003	-1	-2.32193					9	10	0	0	0		969.057	42.9822
YDR528W	HLR1	Protein involved in regulation of cell wall composition and integrity; also involved in cell wall response to osmotic stress; overproduction suppresses a lysis sensitive PKC mutation; HLR1 has a paralog, LRE1, that arose from the whole genome duplication	IV	1.67807	1.43296										0	3	0	0	0	-0.006	24.5238	1.08775
YGL102C		Dubious open reading frame unlikely to encode a functional protein; overlaps 3' end of essential RPL28 gene encoding a large subunit ribosomal protein	IV	2.20163	0.678072										#N/A	#N/A	0	0	0		2.55303	0.113239
YLR442C	SIR3	Silencing protein; interacts with Sir2p, Sir4p, and histone H3 and H4 tails to establish transcriptionally silent chromatin state; required for spreading of silenced chromatin; recruited to chromatin through interaction with Rap1p; C-terminus (residues 840-978) assumes variant winged helix-turn-helix (wH) fold that mediates homodimerization, which is critical for holo-SIR complex loading; SIR3 ha…	IV	1.80736	1.80736	1.37851									4	6	0	0	1	0.115	16.6342	0.737805
YJL011C	RPC17	RNA polymerase III subunit C17; physically interacts with C31, C11, and TFIIIB70; may be involved in the recruitment of pol III by the preinitiation complex; protein abundance increases in response to DNA replication stress; relocalizes to the cytosol in response to hypoxia	IV	1.43296	0.378512	0.378512	-0.152003	-0.514573	-3.32193	-3.32193					6	4	0	0	1	0.033	44.4467	1.97142
YDL095W	PMT1	Protein O-mannosyltransferase of the ER membrane; transfers mannose from dolichyl phosphate-D-mannose to protein serine and threonine residues; 1 of 7 related proteins involved in O-glycosylation which is essential for cell wall rigidity; involved in ER quality control; amino terminus faces cytoplasm, carboxyl terminus faces ER lumen	IV	1.43296	1.20163	1	0.485427		-1.32193	-2.32193	-3.32193				6	4	0	0	0	-0.416	228.572	10.1382
YDR111C	ALT2	Catalytically inactive alanine transaminase; expression is repressed in the presence of alanine and repression is mediated by Nrg1p; ALT2 has a paralog, ALT1, that arose from the whole genome duplication	IV	2.1375	1.96347	0.485427									6	8	0	0	0	0.199	24.1084	1.06932
YJR066W	TOR1	PIK-related protein kinase and rapamycin target; subunit of TORC1, a complex that controls growth in response to nutrients by regulating translation, transcription, ribosome biogenesis, nutrient transport and autophagy; involved in meiosis; TOR1 has a paralog, TOR2, that arose from the whole genome duplication	IV	2.80735	1.926	0.765535	-0.736966	-1.73697	-2.32193						8	9	0	0	1	0.1	27.2633	1.20925
YPL243W	SRP68	Core component of the signal recognition particle (SRP) complex; SRP complex functions in targeting nascent secretory proteins to the endoplasmic reticulum (ER) membrane; relocalizes from cytoplasm to the nuclear periphery upon DNA replication stress	IV	3.16993	3.08746	0.847997	-1.32193								9	7	1	0	1	0.38	128.968	5.72035
YBL091C	MAP2	Methionine aminopeptidase; catalyzes the cotranslational removal of N-terminal methionine from nascent polypeptides; function is partially redundant with that of Map1p	IV	2.7866	1.26303	1	0.925999	-1.73697	-1.73697					III	3	4	0	0	0	-0.531	134.638	5.97182
YDR120C	TRM1	tRNA methyltransferase; two forms of protein are made by alternative translation starts; localizes to both nucleus and mitochondrion to produce modified base N2,N2-dimethylguanosine in tRNAs in both compartments; nuclear Trm1p is evenly distributed around inner nuclear membrane in WT, but mislocalizes as puncta near ER-nucleus junctions in spindle pole body (SPB) mutants; both Trm1p inner nuclear…	IV	2	1.48543	1.1375	0.584963	-1.73697	-2.32193						9	11	0	1	0	0.092	101.92	4.52065
YMR014W	BUD22	Protein required for rRNA maturation and ribosomal subunit biogenesis; required for 18S rRNA maturation; also required for small ribosomal subunit biogenesis; cosediments with pre-ribosomal particles; mutation decreases efficiency of +1 Ty1 frameshifting and transposition, and affects budding pattern	IV	2.26303	1.88752	-0.152003	-0.514573	-3.32193					II		7	4	1	2	0	-0.184	42.9279	1.90405
YOL145C	CTR9	Component of the Paf1p complex involved in transcription elongation; binds to and modulates the activity of RNA polymerases I and II; required for expression of a subset of genes, including cyclin genes; involved in SER3 repression by helping to maintain SRG1 transcription-dependent nucleosome occupancy; contains TPR repeats	IV	1.67807	1.20163	1.07039	-0.736966	-0.736966	-2.32193	-3.32193					6	13	0	0	1		57.8986	2.56807
YJR045C	SSC1	Hsp70 family ATPase; constituent of the import motor component of the Translocase of the Inner Mitochondrial membrane (TIM23 complex); involved in protein translocation and folding; subunit of SceI endonuclease; SSC1 has a paralog, ECM10, that arose from the whole genome duplication	IV	2.10434	1	0.485427	-0.321928					II		III	5	4	1	0	0		673.134	29.8566
YDL078C	MDH3	Peroxisomal malate dehydrogenase; catalyzes interconversion of malate and oxaloacetate; involved in the glyoxylate cycle	IV	3.12101	0.584963		-1	-1.32193	-1.32193	-1.32193					6	4	0	0	0	0.386	127.697	5.66394
YPR033C	HTS1	Cytoplasmic and mitochondrial histidine tRNA synthetase; efficient mitochondrial localization requires both a presequence and an amino-terminal sequence; mutations in human ortholog HARS2 are associated with Perrault syndrome	IV	1.96347	1.926								IV		2	3	2	0	0		305.416	13.5466
YLR305C	STT4	Phosphatidylinositol-4-kinase; functions in the Pkc1p protein kinase pathway; required for normal vacuole morphology, cell wall integrity, and actin cytoskeleton organization	IV	3.83794	1.63227	-1.32193	-1.73697	-1.73697	-1.73697				III		6	5	0	1	0	0.193	47.9769	2.128
YIL043C	CBR1	Cytochrome b reductase; not essential for viability; also detected in mitochondria; mutation in conserved NADH binding domain of the human ortholog results in type I methemoglobinemia	IV	1.32193	0.678072	0.263034	0.137504	-0.321928	-1	-1.32193	-3.32193				3	3	0	0	0		345.856	15.3403
YNR024W	MPP6	Nuclear exosome-associated RNA binding protein; involved in surveillance of pre-rRNAs and pre-mRNAs, and the degradation of cryptic non-coding RNAs (ncRNA); copurifies with ribosomes; relocalizes to the cytosol in response to hypoxia	IV	2.29278	1.07039										7	4	1	0	0	-0.293	33.293	1.4767
YDR428C	BNA7	Formylkynurenine formamidase; involved in the de novo biosynthesis of NAD from tryptophan via kynurenine	IV	2.03562	1.88752	-0.736966	-0.736966	-1	-2.32193	-3.32193				III	3	7	0	0	0	0.375	42.4262	1.8818
YJR130C	STR2	Cystathionine gamma-synthase, converts cysteine into cystathionine; STR2 has a paralog, YML082W, that arose from the whole genome duplication	IV	1.58496	0.678072	0.584963									7	7	0	0	0	0.081	13.4431	0.596266
YKL060C	FBA1	Fructose 1,6-bisphosphate aldolase; required for glycolysis and gluconeogenesis; catalyzes conversion of fructose 1,6 bisphosphate to glyceraldehyde-3-P and dihydroxyacetone-P; locates to mitochondrial outer surface upon oxidative stress; N-terminally propionylated in vivo	IV	3.44626	1.53605	0.263034	-0.152003	-0.321928	-3.32193						6	5	0	0	0		12205.2	541.359
YKR095W-A	PCC1	Component of the EKC/KEOPS protein complex; EKC/KEOPS complex is required for t6A tRNA modification and telomeric TG1-3 recombination; may have role in transcription; other complex members are Kae1p, Gon7p, Bud32p, and Cgi121p	IV	2.43296	2	1.20163	-0.321928	-0.514573	-0.514573	-3.32193	-3.32193	III			0	2	1	0	1	-0.309	66.5298	2.95091
YOR327C	SNC2	Vesicle membrane receptor protein (v-SNARE); involved in the fusion between Golgi-derived secretory vesicles with the plasma membrane; Snc2p levels regulated by Vps45p; member of the synaptobrevin/VAMP family of R-type v-SNARE proteins; SNC2 has a paralog, SNC1, that arose from the whole genome duplication	IV	1.88752	0.847997	0.378512	-0.736966	-1.73697	-3.32193				II		7	3	0	1	0		164.574	7.29961
YDL180W		Putative protein of unknown function; green fluorescent protein (GFP)-fusion protein localizes to the vacuole	IV	3.26303	3.16993	-1.32193	-2.32193								1	5	0	0	0	-0.246	17.8226	0.790515
YHR205W	SCH9	AGC family protein kinase; functional ortholog of mammalian S6 kinase; phosphorylated by Tor1p and required for TORC1-mediated regulation of ribosome biogenesis, translation initiation, and entry into G0 phase; involved in transactivation of osmostress-responsive genes; regulates G1 progression, cAPK activity and nitrogen activation of the FGM pathway; integrates nutrient signals and stress signa…	IV	1.72247	0.378512	0.378512	-1.73697	-2.32193	-3.32193						4	4	0	0	0	-0.115	49.4434	2.19305
YDL082W	RPL13A	Ribosomal 60S subunit protein L13A; not essential for viability; homologous to mammalian ribosomal protein L13, no bacterial homolog; RPL13A has a paralog, RPL13B, that arose from the whole genome duplication	IV	2.8679	0.765535	0.263034	0.137504	-1.73697	-2.32193	-2.32193	-2.32193				8	4	0	0	0		823.53	36.5274
YIL157C	COA1	Mitochondrial inner membrane protein; required for assembly of the cytochrome c oxidase complex (complex IV); interacts with complex IV assembly factor Shy1p during the early stages of assembly	IV	1.37851	1	1	0.765535	-1				II			4	8	1	0	0	-0.359	46.833	2.07726
YDR276C	PMP3	Small plasma membrane protein; confers resistance to amphotericin B and is a potential target of this common antifungal drug; related to a family of plant polypeptides that are overexpressed under high salt concentration or low temperature; not essential for viability; deletion causes hyperpolarization of the plasma membrane potential	IV	1.67807	1.32193	1.32193	-0.152003	-3.32193							3	0	0	0	0		703.778	31.2158
YBR247C	ENP1	Protein associated with U3 and U14 snoRNAs; required for pre-rRNA processing and 40S ribosomal subunit synthesis; localized in the nucleus and concentrated in the nucleolus	IV	2.74416	2.20163	0.584963	-1.73697	-1.73697	-2.32193				I	II	13	4	0	1	0	-0.156	129.123	5.72723
YDL031W	DBP1	Putative ATP-dependent RNA helicase of the DEAD-box protein family; constituent of 66S pre-ribosomal particles; essential protein involved in ribosome biogenesis	IV	2.7866	-0.152003	-0.514573	-0.736966	-0.736966	-0.736966				I	II	9	3	0	1	0	0.105	109.935	4.87611
YDL130W	RPP1B	Ribosomal protein P1 beta; component of the ribosomal stalk, which is involved in interaction of translational elongation factors with ribosome; free (non-ribosomal) P1 stimulates the phosphorylation of the eIF2 alpha subunit (Sui2p) by Gcn2p; accumulation is regulated by phosphorylation and interaction with the P2 stalk component	IV	2.96347	1.88752	0.263034	-0.321928	-0.736966	-3.32193	-3.32193					6	4	1	0	1		1091.28	48.4035
YKL141W	SDH3	Subunit of succinate dehydrogenase and of TIM22 translocase; functions as cytochrome b subunit of succinate dehydrogenase, which couples oxidation of succinate to transfer of electrons to ubiquinone as part of the TCA cycle and the mitochondrial respiratory chain; also required for mitochondrial inner membrane protein import as part of the TIM22 complex; SDH3 has a paralog, SHH3, that arose from …	IV	1.88752	0.378512	0.378512	-0.152003								8	7	0	1	0	0.303	79.0242	3.50509
YER091C	MET6	Cobalamin-independent methionine synthase; involved in methionine biosynthesis and regeneration; requires a minimum of two glutamates on the methyltetrahydrofolate substrate, similar to bacterial metE homologs	IV	2.65535	1.58496	-0.321928	-0.514573	-1.73697							10	2	0	0	0		465.123	20.6304
YML014W	TRM9	tRNA methyltransferase; catalyzes modification of wobble bases in tRNA anticodons to 2, 5-methoxycarbonylmethyluridine and 5-methoxycarbonylmethyl-2-thiouridine; may act as part of a complex with Trm112p; deletion mutation increases translational infidelity, including amino acid misincorporation and -1 frameshifting, and also confers resistance to zymocin; null mutant displays activation of stres…	IV	3.37851	0.847997		-0.514573	-0.736966	-1.32193	-1.32193	-1.32193				5	3	0	0	0	-0.511	51.1998	2.27095
YER087C-B	SBH1	Beta subunit of Sec61p ER translocation complex (Sec61p-Sss1p-Sbh1p); involved in protein translocation into the endoplasmic reticulum; interacts with the exocyst complex and also with Rtn1p; cotranslationally N-acetylated by NatA; SBH1 has a paralog, SBH2, that arose from the whole genome duplication	IV	2.1375	2.1375	1	-0.152003					IV			4	4	0	0	0		278.314	12.3445
YEL059C-A	SOM1	Subunit of the mitochondrial inner membrane peptidase (IMP); IMP is required for maturation of mitochondrial proteins of the intermembrane space; Som1p facilitates cleavage of a subset of substrates; contains twin cysteine-x9-cysteine motifs	IV	3.7115	2.72247	2.23266	-3.32193								4	0	0	0	0	-0.688	13.878	0.615555
YOR167C	RPS28A	Protein component of the small (40S) ribosomal subunit; has an extraribosomal function in regulation of RPS28B, in which Rps28Ap binds to a decapping complex via Edc3p, which then binds to RPS28B mRNA leading to its decapping and degradation; homologous to mammalian ribosomal protein S28, no bacterial homolog; RPS28A has a paralog, RPS28B, that arose from the whole genome duplication	IV	1.20163	0.925999	0.847997	0.378512	-2.32193							5	7	0	0	0		3141.08	139.321
YNL065W	AQR1	Plasma membrane transporter of the major facilitator superfamily; member of the 12-spanner drug:H(+) antiporter DHA1 family; confers resistance to short-chain monocarboxylic acids and quinidine; involved in the excretion of excess amino acids; AQR1 has a paralog, QDR1, that arose from the whole genome duplication; relocalizes from plasma membrane to cytoplasm upon DNA replication stress	IV	2.23266	1.20163	0.925999	-2.32193	-3.32193							6	3	0	0	0	0.241	93.9078	4.16525
YGL083W	SCY1	Putative kinase; suppressor of GTPase mutant; similar to bovine rhodopsin kinase; may have a role in intracellular sterol transport	IV	2.16993									IV		6	10	0	1	0	-0.424	21.8841	0.970663
YDR003W-A		Putative protein of unknown function; identified by expression profiling and mass spectrometry	IV	2	1.37851	1.1375	0.378512	-0.152003	-1.32193						0	0	0	0	0		32.8591	1.45746
YOR130C	ORT1	Ornithine transporter of the mitochondrial inner membrane; exports ornithine from mitochondria as part of arginine biosynthesis; functionally complemented by human ortholog, SLC25A15, which is associated with hyperammonaemia-hyperornithinaemia-homocitrullinuria (HHH) syndrome, but HHH-associated variants fail to complement	IV	1.26303	0.263034	0.263034	-0.152003	-3.32193	-3.32193	-3.32193					8	11	0	0	0	-0.071	17.5324	0.777643
YNL288W	CAF4	Component of the CCR4-NOT transcriptional complex; evolutionarily conserved; involved in controlling mRNA initiation, elongation, and degradation; binds Cdc39p	IV	3.33628	0.263034	0.137504	-1								6	6	0	0	0	-0.141	44.4147	1.97
YGR211W	ZPR1	Essential protein with two zinc fingers; present in the nucleus of growing cells but relocates to the cytoplasm in starved cells via a process mediated by Cpr1p; binds to translation elongation factor eEF-1 (Tef1p); relative distribution to the nucleus increases upon DNA replication stress	IV	2.48543	0.263034	-0.152003							I		10	6	0	1	0		183.926	8.15797
YDR534C	FIT1	Mannoprotein that is incorporated into the cell wall; incorporated via a glycosylphosphatidylinositol (GPI) anchor; involved in the retention of siderophore-iron in the cell wall	IV	0.765535	0.765535	0.137504	-0.321928	-0.321928						III	1	1	0	0	1	-1.439	7.14492	0.316911
YGL027C	CWH41	Processing alpha glucosidase I; ER type II integral membrane N-glycoprotein involved in assembly of cell wall beta 1,6 glucan and asparagine-linked protein glycosylation; also involved in ER protein quality control and sensing of ER stress	IV	1.48543	1.20163	0.485427	0.378512	-3.32193	-3.32193					III	3	3	0	0	0	-0.567	73.8427	3.27527
YMR317W		Putative protein of unknown function; has some similarity to sialidase from Trypanosoma; YMR317W is not an essential gene	IV	3.37851	0.925999	0.847997	-1.32193					II			7	8	1	1	0		8.96784	0.397766
YBR289W	SNF5	Subunit of the SWI/SNF chromatin remodeling complex; involved in transcriptional regulation; functions interdependently in transcriptional activation with Snf2p and Snf6p; relocates to the cytosol under hypoxic conditions	IV	1.96347	0.765535	-0.152003	-0.736966	-1	-1						6	7	1	0	0	0.035	18.3891	0.815641
YCR024C-B		Putative protein of unknown function; identified by expression profiling and mass spectrometry	IV	0.678072		-0.152003	-0.736966	-1.73697	-2.32193	-3.32193					0	1	0	0	0		764.724	33.9191
YNR021W		Putative protein of unknown function; green fluorescent protein (GFP)-fusion protein localizes to the endoplasmic reticulum; YNR021W is not an essential gene	IV	2.37851	1.32193	-0.321928	-0.321928	-1.32193	-1.32193						9	7	0	0	1	0.312	256.039	11.3565
YLR183C	TOS4	Putative transcription factor, contains Forkhead Associated domain; found associated with chromatin; target of SBF transcription factor; expression is periodic and peaks in G1; involved in DNA replication checkpoint response; interacts with Rpd3 and Set3 histone deacetylase (HDAC) complexes; APCC(Cdh1) substrate; relative distribution to the nucleus increases upon DNA replication stress; TOS4 has…	IV	3.12101	1.1375	-0.736966	-0.736966	-1							7	7	0	0	0	-0.251	41.9746	1.86177
YNL225C	CNM67	Component of the spindle pole body outer plaque; required for spindle orientation and mitotic nuclear migration; CNM67 has a paralog, ADY3, that arose from the whole genome duplication	IV	1.37851	1.1375	0.925999	0.847997	-0.152003	-1.73697	-3.32193	-3.32193				5	8	1	0	0	-0.287	18.5119	0.821089
YMR010W		Putative protein of unknown function; green fluorescent protein (GFP)-fusion protein localizes to the cytoplasm; YMR010W is not an essential gene; YMR010W mRNA is transcribed with ADI1	IV	2.10434	2	-0.514573	-1.73697	-1.73697				IV			7	5	2	0	0	0.378	73.7577	3.2715
YER154W	OXA1	Mitochondrial inner membrane insertase; mediates the insertion of both mitochondrial- and nuclear-encoded proteins from the matrix into the inner membrane; also has a role in insertion of carrier proteins into the inner membrane; acts as a voltage-gated ion channel, activated by substrate peptides; interacts with mitochondrial ribosomes; conserved from bacteria to animals	IV	2.76553	1.96347	0.263034	0.137504	-3.32193				I			5	11	1	0	1	-0.121	67.0113	2.97227
YHR071C-A		Dubious open reading frame; unlikely to encode a functional protein, based on available experimental and comparative sequence data; partially overlaps the verified ORF ERG7/YHR072W	IV	2.23266	1.848	0.678072	-2.32193	-2.32193							#N/A	#N/A	0	0	0		1.28004	0.0567757
YFL016C	MDJ1	Co-chaperone that stimulates HSP70 protein Ssc1p ATPase activity; involved in protein folding/refolding in the mitochodrial matrix; required for proteolysis of misfolded proteins; member of the HSP40 (DnaJ) family of chaperones	IV	1.37851	0.847997	0.765535									4	7	0	0	0	-0.024	23.2258	1.03017
YLR264W	RPS28B	Protein component of the small (40S) ribosomal subunit; homologous to mammalian ribosomal protein S28, no bacterial homolog; has an extraribosomal function in autoregulation, in which Rps28Bp binds to a decapping complex via Edc3p, which then binds to RPS28B mRNA leading to its decapping and degradation; RPS28B has a paralog, RPS28A, that arose from the whole genome duplication	IV	1.43296	0.925999	0.137504	0.137504	-3.32193	-3.32193	-3.32193					2	5	2	0	0		542.097	24.0445
YLR181C	VTA1	Multivesicular body (MVB) protein; involved in endosomal protein sorting; regulates Vps4p activity by promoting its oligomerization; has an N-terminal Vps60- and Did2- binding domain, a linker region, and a C-terminal Vps4p binding domain	IV	1.48543	1.43296	-0.152003	-0.152003	-0.321928							6	5	0	0	0	0.089	31.8311	1.41186
YPL160W	CDC6	Cytosolic leucyl tRNA synthetase; ligates leucine to the appropriate tRNA	IV	3.26303	2.67807	1.926	-1.32193	-2.32193	-2.32193	-2.32193	-2.32193				12	7	0	0	0		418.787	18.5752
YER112W	LSM4	Lsm (Like Sm) protein; part of heteroheptameric complexes (Lsm2p-7p and either Lsm1p or 8p): cytoplasmic Lsm1p complex involved in mRNA decay; nuclear Lsm8p complex part of U6 snRNP and possibly involved in processing tRNA, snoRNA, and rRNA; forms cytoplasmic foci upon DNA replication stress	IV	2.1375	1.1375	0.925999	0.263034		-1.73697	-1.73697					11	6	1	1	1	-0.182	100.399	4.45316
YLR268W	SEC22	R-SNARE protein; assembles into SNARE complex with Bet1p, Bos1p and Sed5p; cycles between the ER and Golgi complex; involved in anterograde and retrograde transport between the ER and Golgi; synaptobrevin homolog	IV	3.33628	2.53605		-1	-2.32193	-2.32193				IV	III	3	5	0	0	0	0.083	95.7313	4.24613
YGR172C	YIP1	Integral membrane protein; required for the biogenesis of ER-derived COPII transport vesicles; interacts with Yif1p and Yos1p; localizes to the Golgi, the ER, and COPII vesicles; homolog of human YIPF4	IV	2.03562								IV	IV		6	6	1	0	0	0.281	86.0375	3.81616
YDR164C	SEC1	Sm-like protein involved in docking and fusion of exocytic vesicles; binds to assembled SNARE complexes at the membrane and stimulates membrane fusion; localization to sites of secretion (bud neck and bud tip) is dependent on SNARE function; interacts directly with essential exocyst subunit Sec6p	IV	1.72247	0.584963	0.137504			-0.736966						7	3	0	0	0	-0.029	34.1453	1.5145
YPR133C	SPN1	Protein involved in RNA polymerase II transcription; is constitutively recruited to the CYC1 promoter and is required for recruitment of chromatin remodeling factors for the expression of CYC1 gene; interacts genetically or physically with RNAP II, TBP, TFIIS, and chromatin remodelling factors; central domain highly conserved throughout eukaryotes; mutations confer an Spt- phenotype	IV	2.74416	0.925999	0.925999	-0.736966	-1.73697	-1.73697				II		4	2	0	1	0	0.266	80.7313	3.58081
YDR418W	RPL12B	Ribosomal 60S subunit protein L12B; rpl12a rpl12b double mutant exhibits slow growth and slow translation; homologous to mammalian ribosomal protein L12 and bacterial L11; RPL12B has a paralog, RPL12A, that arose from the whole genome duplication	IV	3.3505	2.07039	0.678072	0.378512	-1.73697	-1.73697						6	6	0	0	1		3443.71	152.744
YPL196W	OXR1	Protein of unknown function required for oxidative damage resistance; required for normal levels of resistance to oxidative damage; null mutants are sensitive to hydrogen peroxide; member of a conserved family of proteins found in eukaryotes	IV	1.96347	1.72247	0.137504	-2.32193							III	6	6	1	0	0	0.284	20.6238	0.91476
YOR293W	RPS1A	Protein component of the small (40S) ribosomal subunit; homologous to mammalian ribosomal protein S10, no bacterial homolog; RPS10A has a paralog, RPS10B, that arose from the whole genome duplication	IV	2.60881	1.80736	0.137504	-0.514573	-1	-1	-1	-1.32193		III	III	5	4	0	0	0		1152.64	51.1251
YBR261C	TAE1	AdoMet-dependent proline methyltransferase; catalyzes the dimethylation of ribosomal proteins Rpl12 and Rps25 at N-terminal proline residues; has a role in protein synthesis; fusion protein localizes to the cytoplasm	IV	2.56072		-0.152003	-0.152003								4	7	0	0	0	-0.027	81.9314	3.63404
YGR017W		Putative protein of unknown function; green fluorescent protein (GFP)-fusion protein localizes to both the nucleus and the cytoplasm	IV	2.3505	1.76554	1.20163	0.378512	-3.32193	-3.32193						6	3	1	0	1	0.403	94.4639	4.18992
YIL018W	RPL2B	Ribosomal 60S subunit protein L2B; homologous to mammalian ribosomal protein L2 and bacterial L2; RPL2B has a paralog, RPL2A, that arose from the whole genome duplication; expression is upregulated at low temperatures	IV	2.48543	1.26303	0.765535	-0.152003	-0.514573							5	8	0	0	0		1744.04	77.3564
YER036C	ARB1	ATPase of the ATP-binding cassette (ABC) family; involved in 40S and 60S ribosome biogenesis, has similarity to Gcn20p; shuttles from nucleus to cytoplasm, physically interacts with Tif6p, Lsg1p	IV	3.93546	2.10434	1.20163	-2.32193						IV	III	7	10	1	1	0		528.763	23.4531
YBR127C	VMA2	Subunit B of V1 peripheral membrane domain of vacuolar H+-ATPase; electrogenic proton pump found throughout the endomembrane system; contains nucleotide binding sites; also detected in the cytoplasm; protein abundance increases in response to DNA replication stress; human homolog ATP6V1B1 implicated in autosomal-recessive distal renal tubular acidosis (RTA) with sensorineural deafness; human ATP6…	IV	2.70044	1.26303	0.137504	-0.152003						II		3	7	0	0	0		731.572	32.4486
YJL079C	PRY1	Sterol binding protein involved in the export of acetylated sterols; secreted glycoprotein and member of the CAP protein superfamily (cysteine-rich secretory proteins (CRISP), antigen 5, and pathogenesis related 1 proteins); sterol export function is redundant with that of PRY2; may be involved in detoxification of hydrophobic compounds; PRY1 has a paralog, PRY2, that arose from the whole genome …	IV	2.88753	2.67807	0.137504									5	6	0	0	0	-0.29	31.8969	1.41477
YKL016C	ATP7	Subunit d of the stator stalk of mitochondrial F1F0 ATP synthase; F1F0 ATP synthase is a large, evolutionarily conserved enzyme complex required for ATP synthesis	IV	1.76554	1.32193		-1.73697	-3.32193				IV			6	3	0	0	0	0.02	159.571	7.0777
YDR034C	LYS14	Transcriptional activator involved in regulating lysine biosynthesis; involved in the regulation of genes of the lysine biosynthesis pathway; requires 2-aminoadipate semialdehyde as co-inducer	IV	2.03562											1	4	0	0	0	-0.048	29.0341	1.2878
YDR153C	ENT5	Protein containing an N-terminal epsin-like domain; involved in clathrin recruitment and traffic between the Golgi and endosomes; associates with the clathrin adaptor Gga2p, clathrin adaptor complex AP-1, and clathrin	IV	2.16993	1.53605	1.37851	-1	-1.32193							4	7	0	0	1	-0.238	57.2359	2.53868
YDL086W		Putative carboxymethylenebutenolidase; the authentic, non-tagged protein is detected in highly purified mitochondria in high-throughput studies; YDL086W is not an essential gene	IV	3.27799	1.43296	0.847997	-2.32193					IV	IV	III	4	2	0	0	0	-0.061	83.5717	3.7068
YBR070C	ALG14	Component of UDP-GlcNAc transferase; required for the second step of dolichyl-linked oligosaccharide synthesis; anchors the catalytic subunit Alg13p to the ER membrane; similar to bacterial and human glycosyltransferases	IV	1.76554	1.72247										4	0	0	0	0	-0.068	33.3946	1.48121
YPR189W	SKI3	Ski complex component and TPR protein; mediates 3'-5' RNA degradation by the cytoplasmic exosome; null mutants have superkiller phenotype of increased viral dsRNAs and are synthetic lethal with mutations in 5'-3' mRNA decay; mutations in the human ortholog, TTC37, causes Syndromic diarrhea/Trichohepatoenteric (SD/THE) syndrome	IV	2.53605	2.3505	0.678072	0.485427	-1.32193	-1.73697	-1.73697					7	8	0	0	1	-0.13	39.4756	1.75093
YPR163C	TIF3	Translation initiation factor eIF-4B; contains an RNA recognition motif and binds to single-stranded RNA; has RNA annealing activity; interacts with Rps20p at the head of the 40S ribosomal subunit and alters the structure of the mRNA entry channel	IV	2.53605	1.58496	0.485427	-0.514573	-1	-1.73697						8	9	1	0	0		525.961	23.3288
YDR133C		Dubious open reading frame; unlikely to encode a functional protein, based on available experimental and comparative sequence data; partially overlaps YDR134C	IV	0.678072	0.485427	0.137504	-0.152003	-1	-3.32193	-3.32193					#N/A	#N/A	0	0	1		59.6941	2.64771
YLR229C	CDC42	Small rho-like GTPase; essential for establishment and maintenance of cell polarity; plays a role late in cell fusion via activation of key cell fusion regulator Fus2p; mutants have defects in the organization of actin and septins	IV	2.37851	0.847997	0.678072	-0.321928	-0.514573							3	5	0	0	0		212.19	9.41162
YJR024C	MDE1	5'-methylthioribulose-1-phosphate dehydratase; acts in the methionine salvage pathway; potential Smt3p sumoylation substrate; expression downregulated by caspofungin and deletion mutant is caspofungin resistant	IV	1.80736	1.26303	0.378512	-0.321928	-0.736966	-3.32193						6	9	0	0	0	0.064	84.5204	3.74888
YNL209W	SSB2	Cytoplasmic ATPase that is a ribosome-associated molecular chaperone; functions with J-protein partner Zuo1p; may be involved in the folding of newly-synthesized polypeptide chains; member of the HSP70 family; SSB2 has a paralog, SSB1, that arose from the whole genome duplication	IV	2.58496	0.584963	0.263034	-1.73697	-2.32193	-3.32193	-3.32193		IV			14	8	0	1	0		1328.17	58.9104
YHR025W	THR1	Homoserine kinase; conserved protein required for threonine biosynthesis; long-lived protein that is preferentially retained in mother cells and forms cytoplasmic filaments; expression is regulated by the GCN4-mediated general amino acid control pathway	IV	3.90689	2	-0.152003	-0.514573	-1							3	4	0	0	0		305.177	13.536
YBR084W	MIS1	Mitochondrial C1-tetrahydrofolate synthase; involved in interconversion between different oxidation states of tetrahydrofolate (THF); provides activities of formyl-THF synthetase, methenyl-THF cyclohydrolase, and methylene-THF dehydrogenase	IV	3.52356	1.67807	0.137504									5	5	0	1	0	-0.859	219.991	9.75762
YJL062W	LAS21	Integral plasma membrane protein; involved in the synthesis of the glycosylphosphatidylinositol (GPI) core structure; mutations affect cell wall integrity	IV	2.40599	0.847997	0.378512	0.378512	-1.73697							3	6	0	0	1	0.298	29.5423	1.31034
YDR248C		Putative gluconokinase; sequence similarity to bacterial and human gluconokinase; green fluorescent protein (GFP)-fusion protein localizes to the cytoplasm; upregulated by deletion of the RNAP-II associated factor, PAF1	IV	2.07039	1.53605										2	6	0	0	0	0.066	36.0672	1.59975
YGR198W	YPP1	Cargo-transport protein involved in endocytosis; interacts with phosphatidylinositol-4-kinase Stt4p; is required, along with Efr3p, for the assembly and recruitment of multiple copies of the kinase into phosphoinositide kinase (PIK) patches at the plasma membrane; positively regulates Stt4p; GFP-fusion protein localizes to the cytoplasm; YGR198W is an essential gene	IV	2.88753	2.20163	1.58496	-1	-1						III	5	9	0	1	0	0.32	55.3352	2.45438
YDR493W	MZM1	Protein required for assembly of the cytochrome bc(1) complex; acts as a chaperone for Rip1p and facilitates its insertion into the complex at a late stage of assembly; localized to the mitochondrial matrix; null mutant exhibits a respiratory growth defect and reduced mitochondrial zinc levels, which is characteristic of mutations affecting bc(1) complex assembly; member of the LYR protein family…	IV	2.32193								I			5	5	1	0	0	-0.672	35.5073	1.57492
YOR352W	TFB6	Subunit of TFIIH complex; facilities dissociation of the Ssl2p helices from TFIIH; expression levels regulated by Arg5,6p; green fluorescent protein (GFP)-fusion protein localizes to the cytoplasm and nucleus	IV	2.40599	1.26303	0.847997	0.584963	0.485427	-2.32193	-2.32193	-2.32193				6	8	0	0	0	-0.288	18.0173	0.799152
YMR188C	MRPS17	Mitochondrial ribosomal protein of the small subunit	IV	3.21723	-0.321928	-0.514573	-0.736966	-1	-3.32193			III		IV	3	10	1	0	1	-0.23	38.0378	1.68715
YDR466W	PKH3	Protein kinase with similarity to mammalian PDK1 and yeast Pkh1p/Phk2p; yeast Pkh1p and Pkh2p are two redundant upstream activators of Pkc1p; identified as a multicopy suppressor of a pkh1 pkh2 double mutant	IV	1.37851	0.925999		-0.152003								5	7	0	1	0	-0.033	20.8453	0.924586
YKR065C	PAM17	Constituent of the TIM23 complex; proposed alternatively to be a component of the import motor (PAM complex) or to interact with and modulate the core TIM23 (Translocase of the Inner mitochondrial Membrane) complex; protein abundance increases in response to DNA replication stress	IV	1.96347	0.378512	-0.152003	-0.321928	-0.321928				II			5	6	1	0	1	-0.197	88.7315	3.93566
YNL147W	LSM7	Lsm (Like Sm) protein; part of heteroheptameric complexes (Lsm2p-7p and either Lsm1p or 8p): cytoplasmic Lsm1p complex involved in mRNA decay; nuclear Lsm8p complex part of U6 snRNP and possibly involved in processing tRNA, snoRNA, and rRNA; protein abundance increases and forms cytoplasmic foci in response to DNA replication stress	IV	2.60881	2.43296	0.485427									8	3	0	0	0	-0.026	87.6032	3.88561
YBR254C	TRS2	Core component of transport protein particle (TRAPP) complexes I-III; TRAPPs are multimeric guanine nucleotide-exchange factors for GTPase Ypt1p, regulating ER-Golgi traffic (TRAPPI), intra-Golgi traffic (TRAPPII), endosome-Golgi traffic (TRAPPII and III) and autophagy (TRAPPIII); mutation leads to defects in endocytic recycling, block in sporulation/meiosis; mutations in human homolog TRAPPC2 ca…	IV	2.96347	1.96347	0.137504	-2.32193								4	5	0	0	0	0.085	44.668	1.98123
YMR304C-A		Dubious open reading frame; unlikely to encode a functional protein, based on available experimental and comparative sequence data; partially overlaps 3' end of verified ORF SCW10/YMR305C	IV	2.03562	2	1.67807	-3.32193								#N/A	#N/A	0	0	0		119.924	5.31918
YOR156C	NFI1	SUMO E3 ligase; catalyzes sumoylation of Yku70p/Yku80p and Sir4p promoting chromatin anchoring; DNA-bound form catalyzes a DNA-damaged triggered sumoylation wave resulting in multisite modification of several DNA repair proteins, enhancing interactions between these proteins and accelerating repair; promotes telomere anchoring to the nuclear envelope; involved in maintenance of proper telomere le…	IV	3.18587	1.848	0.378512									5	8	0	1	0		12.6022	0.558968
YDR382W	RPP2B	Ribosomal protein P2 beta; a component of the ribosomal stalk, which is involved in the interaction between translational elongation factors and the ribosome; free (non-ribosomal) P2 stimulates the phosphorylation of the eIF2 alpha subunit (Sui2p) by Gcn2p; regulates the accumulation of P1 (Rpp1Ap and Rpp1Bp) in the cytoplasm	IV	1.1375	0.263034	-0.321928	-1	-1.32193	-1.32193	-3.32193	-3.32193				11	7	0	0	0		3732.29	165.544
YPL090C	RPS6A	Protein component of the small (40S) ribosomal subunit; homologous to mammalian ribosomal protein S6, no bacterial homolog; RPS6A has a paralog, RPS6B, that arose from the whole genome duplication	IV	1.63227	0.765535		-0.514573	-1.32193	-1.73697						9	11	0	0	1		231.639	10.2743
YDR423C	CAD1	AP-1-like basic leucine zipper (bZIP) transcriptional activator; involved in stress responses, iron metabolism, and pleiotropic drug resistance; controls a set of genes involved in stabilizing proteins; binds consensus sequence TTACTAA; CAD1 has a paralog, YAP1, that arose from the whole genome duplication	IV	0.765535	0.378512	0.378512									3	5	0	0	0	0.147	28.1107	1.24684
YMR058W	FET3	Ferro-O2-oxidoreductase; multicopper oxidase that oxidizes ferrous (Fe2+) to ferric iron (Fe3+) for subsequent cellular uptake by transmembrane permease Ftr1p; required for high-affinity iron uptake and involved in mediating resistance to copper ion toxicity, belongs to class of integral membrane multicopper oxidases; protein abundance increases in response to DNA replication stress	IV	0.925999	0.678072	-0.736966	-1	-1.32193	-3.32193						8	7	0	0	0		348.845	15.4729
YJL189W	RPL39	Ribosomal 60S subunit protein L39; required for ribosome biogenesis; loss of both Rpl31p and Rpl39p confers lethality; also exhibits genetic interactions with SIS1 and PAB1; homologous to mammalian ribosomal protein L39, no bacterial homolog	IV	2.3505	1.37851	0.925999	-1.32193								5	4	0	1	0		1239.5	54.9775
YGR157W	CHO2	Phosphatidylethanolamine methyltransferase (PEMT); catalyzes the first step in the conversion of phosphatidylethanolamine to phosphatidylcholine during the methylation pathway of phosphatidylcholine biosynthesis	IV	2.60881	0.847997	-0.152003	-1	-1.73697	-3.32193						8	7	0	1	0	-0.071	153.492	6.80807
YDR177W	UBC1	Ubiquitin-conjugating enzyme; key E2 partner with Ubc4p for the anaphase-promoting complex (APC); mediates selective degradation of short-lived and abnormal proteins; plays a role in vesicle biogenesis and ER-associated protein degradation (ERAD); component of the cellular stress response; protein abundance increases in response to DNA replication stress key E2 partner with Ubc4p for the anaphase…	IV	2.32193		-0.514573	-0.514573	-0.736966	-3.32193	-3.32193		IV			8	6	0	0	0	0.03	90.3484	4.00737
YNL111C	CYB5	Cytochrome b5; involved in the sterol and lipid biosynthesis pathways; acts as an electron donor to support sterol C5-6 desaturation	IV	2.29278	1.20163	0.765535	-0.514573	-1.73697	-3.32193				III		8	5	1	1	0	-0.008	175.881	7.80114
YIL016W	SNL1	Ribosome-associated protein; proposed to act in protein synthesis and nuclear pore complex biogenesis and maintenance as well as protein folding; has similarity to the mammalian BAG-1 protein	IV	2.48543	1.88752	0.847997	-2.32193	-2.32193	-2.32193						7	7	0	0	1	0.076	77.0158	3.41601
YCR077C	PAT1	Deadenylation-dependent mRNA-decapping factor; also required for faithful chromosome transmission, maintenance of rDNA locus stability, and protection of mRNA 3'-UTRs from trimming; associated with topoisomerase II; binds to mRNAs under glucose starvation, most often in the 3' UTR; functionally linked to Pab1p; forms cytoplasmic foci upon DNA replication stress; phosphorylation by PKA inhibits P …	IV	2.10434	1.53605	0.925999	-0.736966	-1.32193	-1.73697	-3.32193					8	5	1	0	1	0.13	97.4808	4.32373
YHR073W	OSH3	Member of an oxysterol-binding protein family; this family has seven members in S. cerevisiae; family members have overlapping, redundant functions in sterol metabolism and collectively perform a function essential for viability; contains FFAT motif; interacts with ER anchor Scs2p at patches at the plasma membrane; regulated by sterol binding	IV	2.43296	1.20163	1.20163	0.485427	-2.32193	-2.32193	-2.32193	-2.32193		IV	III	8	10	0	1	0	0.214	54.495	2.41711
YBR249C	ARO4	3-deoxy-D-arabino-heptulosonate-7-phosphate (DAHP) synthase; catalyzes the first step in aromatic amino acid biosynthesis and is feedback-inhibited by tyrosine or high concentrations of phenylalanine or tryptophan; relative distribution to the nucleus increases upon DNA replication stress	IV	2.96347	2.45943	1.76554	-3.32193	-3.32193						III	6	10	0	0	0		409.814	18.1772
YLR084C	RAX2	N-glycosylated protein; involved in the maintenance of bud site selection during bipolar budding; localization requires Rax1p; RAX2 mRNA stability is regulated by Mpt5p	IV	1.72247	0.925999	0.485427	0.263034	-0.514573	-2.32193						9	2	0	1	0	-0.69	52.5194	2.32948
YBR149W	ARA1	NADP+ dependent arabinose dehydrogenase; involved in carbohydrate metabolism; purified as homodimer; naturally occurs with a N-terminus degradation product	IV	2.926	1	0.847997								III	3	6	0	0	0	0.443	103.353	4.58421
YLR259C	HSP6	Tetradecameric mitochondrial chaperonin; required for ATP-dependent folding of precursor polypeptides and complex assembly; prevents aggregation and mediates protein refolding after heat shock; role in mtDNA transmission; phosphorylated	IV	2.8679	1.926	0.925999	-0.321928	-2.32193				I		III	3	6	1	0	0		566.234	25.1151
YKL160W	ELF1	Transcription elongation factor with a conserved zinc finger domain; implicated in the maintenance of proper chromatin structure in actively transcribed regions; deletion inhibits Brome mosaic virus (BMV) gene expression	IV	1.88752	1.43296	1.32193	0.263034	-3.32193							6	3	1	1	0		145.939	6.47306
YLR188W	MDL1	Mitochondrial inner membrane half-type ABC transporter; mediates export of peptides generated upon proteolysis of mitochondrial proteins; plays a role in the regulation of cellular resistance to oxidative stress	IV	2.26303	1.58496	1.48543	-1.32193	-2.32193							4	3	0	2	0	0.358	42.808	1.89874
YOR184W	SER1	3-phosphoserine aminotransferase; catalyzes the formation of phosphoserine from 3-phosphohydroxypyruvate, required for serine and glycine biosynthesis; regulated by the general control of amino acid biosynthesis mediated by Gcn4p; protein abundance increases in response to DNA replication stress	IV	2.10434	1.43296							IV			3	3	0	0	0		198.963	8.82492
YMR266W	RSN1	Membrane protein of unknown function; overexpression suppresses NaCl sensitivity of sro7 mutant cells by restoring sodium pump (Ena1p) localization to the plasma membrane	IV	2.3505	1.72247	0.765535	0.263034	-1	-1.73697	-2.32193	-2.32193				8	10	0	0	1	-0.156	128.319	5.69155
YDR245W	MNN1	Subunit of a Golgi mannosyltransferase complex; complex mediates elongation of the polysaccharide mannan backbone; membrane protein of the mannosyltransferase family; other members of the complex are Anp1p, Mnn9p, Mnn11p, and Hoc1p	IV	3.47249	0.925999	-1.73697	-1.73697	-3.32193	-3.32193						10	6	0	0	1	0.132	128.171	5.68498
YBR086C	IST2	Cortical ER protein involved in ER-plasma membrane tethering; one of 6 proteins (Ist2p, Scs2p, Scs22p, Tcb1p, Tcb2p, Tcb3p) that connect ER to the plasma membrane (PM) and regulate PM phosphatidylinositol-4-phosphate (PI4P) levels by controlling access of Sac1p phosphatase to its substrate PI4P in the PM; localizes to the mother cell in small-budded cells and to the bud in medium- and large-budde…	IV	0.765535	-0.514573	-3.32193									7	6	0	0	1	-0.228	143.663	6.37213
YIL078W	THS1	Threonyl-tRNA synthetase; essential cytoplasmic protein; human homolog TARS can complement yeast null mutant	IV	1.88752	0.137504	-1.32193							IV		12	7	0	0	0		756.224	33.5421
YML080W	DUS1	Dihydrouridine synthase; member of a widespread family of conserved proteins including Smm1p, Dus3p, and Dus4p; modifies pre-tRNA(Phe) at U17	IV	1.43296	0.765535	-1.32193							II		7	10	0	1	0	-0.042	47.5505	2.10909
YMR238W	DFG5	Putative mannosidase; essential glycosylphosphatidylinositol (GPI)-anchored membrane protein required for cell wall biogenesis in bud formation, involved in filamentous growth, homologous to Dcw1p	IV	1.88752	-1.73697										15	6	0	1	0	0.172	58.1795	2.58053
YPL046C	ELC1	Elongin C, conserved among eukaryotes; forms a complex with Cul3p that polyubiquitylates monoubiquitylated RNA polymerase II to trigger its proteolysis; plays a role in global genomic repair	IV	0.678072	-1.73697	-3.32193	-3.32193	-3.32193							6	3	0	0	0	-0.225	19.2903	0.855615
YDR284C	DPP1	Diacylglycerol pyrophosphate (DGPP) phosphatase; zinc-regulated vacuolar membrane-associated lipid phosphatase, dephosphorylates DGPP to phosphatidate (PA) and Pi, then PA to diacylglycerol; involved in lipid signaling and cell metabolism	IV	0.925999											7	7	0	0	0	0.226	63.169	2.80184
YOR361C	PRT1	eIF3b subunit of the eukaryotic translation initiation factor 3 (eIF3); subunit of the core complex of eIF3; essential for translation; part of a subcomplex (Prt1p-Rpg1p-Nip1p) that stimulates binding of mRNA and tRNA(i)Met to ribosomes	IV	2.65535	1.48543	-1	-3.32193	-3.32193					II	III	13	10	0	1	0		291.658	12.9364
YLL004W	ORC3	Subunit of the origin recognition complex (ORC); ORC directs DNA replication by binding to replication origins and is also involved in transcriptional silencing	IV	0.847997	-2.32193										6	7	0	0	0	0.153	20.5842	0.913008
YDR086C	SSS1	Subunit of the Sec61p translocation complex (Sec61p-Sss1p-Sbh1p); this complex forms a channel for passage of secretory proteins through the endoplasmic reticulum membrane, and of the Ssh1p complex (Ssh1p-Sbh2p-Sss1p); interacts with Ost4p and Wbp1p	IV	1.07039	-0.514573	-0.736966	-2.32193	-3.32193	-3.32193	-3.32193				III	7	5	0	0	0		550.843	24.4325
YHL034C	SBP1	Protein that binds eIF4G and has a role in repression of translation; has an RGG motif; found in cytoplasmic P bodies; binds to mRNAs under glucose starvation stress, most often in the 5' UTR; found associated with small nucleolar RNAs snR10 and snR11; SBP1 has a paralog, RNP1, that arose from the whole genome duplication	IV	2.07039	0.378512	-1.32193	-1.32193	-3.32193							7	7	1	0	2		378.823	16.8025
YDR457W	TOM1	E3 ubiquitin ligase of the hect-domain class; has a role in mRNA export from the nucleus and may regulate transcriptional coactivators; involved in degradation of excess histones; interacts with Dia2p and is required for Dia2p degradation; required to target Cdc6p for ubiquitin-mediated destruction during G1 phase	IV	1.72247											10	9	0	0	1	-0.229	57.913	2.56871
YGR137W		Dubious open reading frame; unlikely to encode a functional protein, based on available experimental and comparative sequence data	IV	1.37851											#N/A	#N/A	0	0	0		20.9862	0.930837
YML063W	RPS1B	Ribosomal protein 10 (rp10) of the small (40S) subunit; homologous to mammalian ribosomal protein S3A, no bacterial homolog; RPS1B has a paralog, RPS1A, that arose from the whole genome duplication	IV	0.485427	-1.32193	-2.32193						IV			11	6	0	0	0		3243.14	143.848
YPL061W	ALD6	Cytosolic aldehyde dehydrogenase; activated by Mg2+ and utilizes NADP+ as the preferred coenzyme; required for conversion of acetaldehyde to acetate; constitutively expressed; locates to the mitochondrial outer surface upon oxidative stress	IV	0.678072	-0.514573	-1.32193	-2.32193	-3.32193	-3.32193						4	3	0	0	1		1238.33	54.9259
YDR458C	HEH2	Inner nuclear membrane (INM) protein; contains helix-extension-helix (HEH) motif, nuclear localization signal sequence; targeting to the INM requires the Srp1p-Kap95p karyopherins and the Ran cycle; HEH2 has a paralog, SRC1, that arose from the whole genome duplication	IV	2.56072	0.263034	-1.73697	-3.32193	-3.32193					II		9	8	0	3	0	-0.716	31.553	1.39952
YPL145C	KES1	One of seven members of the yeast oxysterol binding protein family; involved in negative regulation of Sec14p-dependent Golgi complex secretory functions, peripheral membrane protein that localizes to the Golgi complex; KES1 has a paralog, HES1, that arose from the whole genome duplication	IV	2.26303	1.07039	-0.736966	-1.73697	-2.32193	-3.32193	-3.32193	-3.32193		IV		4	6	0	0	0	0.538	234.612	10.4061
YEL042W	GDA1	Guanosine diphosphatase located in the Golgi; involved in the transport of GDP-mannose into the Golgi lumen by converting GDP to GMP after mannose is transferred its substrate	IV	2.58496	1	0.378512	-3.32193								9	5	0	1	0	0.115	200.379	8.88773
YHL032C	GUT1	Glycerol kinase; converts glycerol to glycerol-3-phosphate; glucose repression of expression is mediated by Adr1p and Ino2p-Ino4p; derepression of expression on non-fermentable carbon sources is mediated by Opi1p and Rsf1p	IV	1	-0.321928	-0.514573	-3.32193	-3.32193	-3.32193						8	6	0	0	1	0.285	22.0258	0.976946
YJL111W	CCT7	Subunit of the cytosolic chaperonin Cct ring complex; related to Tcp1p, required for the assembly of actin and tubulins in vivo; mutant has increased aneuploidy tolerance	IV	1.1375									IV		9	9	1	1	1	0.104	160.434	7.11598
YBL014C	RRN6	Component of the core factor (CF) rDNA transcription factor complex; CF is required for transcription of 35S rRNA genes by RNA polymerase I and is composed of Rrn6p, Rrn7p, and Rrn11p	IV	3.23266	-3.32193	-3.32193									5	2	0	0	0	-0.398	32.8093	1.45524
YJR112W	NNF1	Essential component of the MIND kinetochore complex; joins kinetochore subunits contacting DNA to those contacting microtubules; required for accurate chromosome segregation; complex consists of Mtw1p Including Nnf1p-Nsl1p-Dsn1p (MIND)	IV	2.20163	-1.32193										6	7	0	0	0	0.356	42.4399	1.88241
YOR260W	GCD1	Gamma subunit of the translation initiation factor eIF2B; the guanine-nucleotide exchange factor for eIF2; activity subsequently regulated by phosphorylated eIF2; first identified as a negative regulator of GCN4 expression	IV	1.76554	-3.32193										5	9	0	0	1	0.119	167.52	7.43028
YNR031C	SSK2	MAP kinase kinase kinase of HOG1 mitogen-activated signaling pathway; interacts with Ssk1p, leading to autophosphorylation and activation of Ssk2p which phosphorylates Pbs2p; also mediates actin cytoskeleton recovery from osmotic stress; a HOG-independent function of Ssk2p mediates the calcium-sensitive phenotype of the ptp2 msg5 double disruptant; SSK2 has a paralog, SSK22, that arose from the w…	IV	2.37851	0.137504	-1.32193									8	8	0	1	0	-0.043	27.9562	1.23999
YKL008C	LAC1	Ceramide synthase component; involved in synthesis of ceramide from C26(acyl)-coenzyme A and dihydrosphingosine or phytosphingosine, functionally equivalent to Lag1p; LAC1 has a paralog, LAG1, that arose from the whole genome duplication	IV	2.26303	0.263034	-0.321928	-3.32193								4	6	0	0	0	0.247	124.481	5.52131
YPL198W	RPL7B	Ribosomal 60S subunit protein L7B; required for processing of 27SA3 pre-rRNA to 27SB pre-rRNA during assembly of large ribosomal subunit; depletion leads to a turnover of pre-rRNA; contains a conserved C-terminal Nucleic acid Binding Domain (NDB2); binds to Domain II of 25S and 5.8S rRNAs; homologous to mammalian ribosomal protein L7 and bacterial L30; RPL7B has a paralog, RPL7A, that arose from …	IV	0.378512		-0.514573	-1.73697						II	III	7	5	0	1	0		68.2106	3.02546
YPL139C	UME1	Component of both the Rpd3S and Rpd3L histone deacetylase complexes; negative regulator of meiosis; required for repression of a subset of meiotic genes during vegetative growth, binding of histone deacetylase Rpd3p required for activity, contains a NEE box and a WD repeat motif; homologous with Wtm1p; UME1 has a paralog, WTM2, that arose from the whole genome duplication	IV	0.765535	-0.321928	-1.73697									6	4	2	0	1	0.733	19.3585	0.858641
YPR165W	RHO1	GTP-binding protein of the rho subfamily of Ras-like proteins; involved in establishment of cell polarity; regulates protein kinase C (Pkc1p) and the cell wall synthesizing enzyme 1,3-beta-glucan synthase (Fks1p and Gsc2p)	IV	2.96347	0.925999	0.137504	-3.32193	-3.32193	-3.32193	-3.32193		IV		IV	3	5	1	0	0		478.277	21.2138
YGR090W	UTP22	Component of the small-subunit processome; required for nuclear export of tRNAs; may facilitate binding of Utp8p to aminoacylated tRNAs and their delivery to Los1p for export; conserved from yeast to mammals	IV	0.378512		-0.736966	-2.32193						III		8	7	0	1	0	0.248	121.222	5.37675
YPR161C	SGV1	Cyclin (Bur2p)-dependent protein kinase; part of the BUR kinase complex which functions in transcriptional regulation; phosphorylates the carboxy-terminal domain (CTD) of Rpo21p and the C-terminal repeat domain of Spt5p; recruits Spt6p to the CTD at the onset of transcription; regulated by Cak1p; similar to metazoan CDK9 proteins	IV	2.72247		-1	-1.32193						II		8	4	0	1	0	0.306	48.8247	2.1656
YBR118W	TEF2	Translational elongation factor EF-1 alpha; in the GTP-bound active form, binds to and delivers aminoacylated tRNA to the A-site of ribosomes for elongation of nascent polypeptides; associates with vacuolar Rho1p GTPase; TEF2-RFP levels increase during replicative aging; may also have a role in tRNA re-export from the nucleus; TEF2 has a paralog, TEF1, that arose from the whole genome duplication	IV	1.26303	-0.152003	-1.32193	-1.73697								8	7	0	0	0		763.301	33.856
TLC1	TLC1	RNA template component of telomerase; flexible scaffold that tethers telomerase holoenzyme protein subunits to the complex; contains template sequence that Est2p uses to add irregular repeats of TG(1-3) residues onto a DNA end; promoter regulated by the cell cycle dependent transcriptional activators Swi4p/Swi6p and Mbp1p/Swi6p	IV	2.45943	-1	-1.32193	-1.73697							III	#N/A	#N/A	0	0	0	#N/A	#N/A	#N/A
YKL096W	CWP1	Cell wall mannoprotein that localizes to birth scars of daughter cells; linked to a beta-1,3- and beta-1,6-glucan heteropolymer through a phosphodiester bond; required for propionic acid resistance	IV	2.20163	-0.321928	-0.321928									2	4	0	0	0	0.753	145.639	6.45979
YBL072C	RPS8A	Protein component of the small (40S) ribosomal subunit; homologous to mammalian ribosomal protein S8, no bacterial homolog; RPS8A has a paralog, RPS8B, that arose from the whole genome duplication	IV	1	-0.514573	-0.514573									7	11	0	0	0		1166.24	51.7281
tN(GUU)K		Asparagine tRNA (tRNA-Asn), predicted by tRNAscan-SE analysis	IV	0.925999	-0.321928	-3.32193									#N/A	#N/A	0	0	0	#N/A	#N/A	#N/A
YPR159W	KRE6	Type II integral membrane protein; required for beta-1,6 glucan biosynthesis; putative beta-glucan synthase; localizes to ER, plasma membrane, sites of polarized growth and secretory vesicles; functionally redundant with Skn1p; KRE6 has a paralog, SKN1, that arose from the whole genome duplication	IV	1.1375	0.485427	-0.514573	-3.32193								3	6	0	0	0	-0.007	158.814	7.04414
YDL074C	BRE1	E3 ubiquitin ligase; forms heterodimer with Rad6p to regulate K63 polyubiquitination in response to oxidative stress and to monoubiquinate histone H2B-K123, which is required for the subsequent methylation of histone H3-K4 and H3-K79; required for DSBR, transcription, silencing, and checkpoint control; interacts with RNA-binding protein Npl3p, linking histone ubiquitination to mRNA processing; Br…	IV	2.40599	1.96347	-2.32193	-3.32193								9	11	1	0	1	-0.057	78.6577	3.48884
YLR083C	EMP7	Protein with a role in cellular adhesion and filamentous growth; also endosome-to-vacuole sorting; similar to Tmn3p; member of Transmembrane Nine family of proteins with 9 transmembrane segments; EMP70 has a paralog, TMN2, that arose from the whole genome duplication	IV	0.847997	-0.321928	-1	-1.73697	-1.73697	-3.32193						4	8	1	0	0	-0.2	169.013	7.49653
YNL188W	KAR1	Protein involved in karyogamy and spindle pole body duplication; involved in karyogamy during mating; involved in spindle pole body duplication during mitosis; localizes to the half-bridge of the spindle pole body; interacts with Spc72p during karyogamy; also interacts with Cdc31p; essential gene	IV	1.53605	0.765535	-3.32193									1	3	0	0	0	-0.062	23.1998	1.02902
YER057C	HMF1	Member of the p14.5 protein family; functionally complements Mmf1p function when targeted to mitochondria; heat shock inducible; high-dosage growth inhibitor; forms a homotrimer in vitro; HMF1 has a paralog, MMF1, that arose from the whole genome duplication	IV	1.32193	0.378512	-3.32193									6	3	0	1	0		232.419	10.3088
YNL300W	TOS6	Glycosylphosphatidylinositol-dependent cell wall protein; expression is periodic and decreases in respone to ergosterol perturbation or upon entry into stationary phase; depletion increases resistance to lactic acid	IV	2.20163	-3.32193	-3.32193	-3.32193							III	1	2	0	0	0		161.891	7.18064
YGR084C	MRP13	Mitochondrial ribosomal protein of the small subunit	IV	1.37851	0.584963							II			1	4	1	0	0	0.31	41.1601	1.82564
YGL019W	CKB1	Beta regulatory subunit of casein kinase 2 (CK2); a Ser/Thr protein kinase with roles in cell growth and proliferation; CK2, comprised of CKA1, CKA2, CKB1 and CKB2, has many substrates including transcription factors and all RNA polymerases	IV	2.16993	0.137504	-1.73697	-2.32193	-2.32193							10	6	0	1	0	-0.06	117.757	5.22305
YMR205C	PFK2	Beta subunit of heterooctameric phosphofructokinase; involved in glycolysis; indispensable for anaerobic growth; activated by fructose-2,6-bisphosphate and AMP; mutation inhibits glucose induction of cell cycle-related genes	IV	2.1375	0.378512								IV		11	10	0	0	0		791.06	35.0872
YMR297W	PRC1	Vacuolar carboxypeptidase Y (proteinase C, CPY); broad-specificity C-terminal exopeptidase involved in non-specific protein degradation in the vacuole; member of the serine carboxypeptidase family	IV	1.1375	-0.514573	-1.32193	-1.73697	-2.32193	-2.32193						5	8	0	0	0	0.583	243.95	10.8203
YEL033W	MTC7	Protein of unknown function; predicted metabolic role based on network analysis derived from ChIP experiments, a large-scale deletion study and localization of transcription factor binding sites; null mutant is sensitive to temperature oscillation in a cdc13-1 mutant	IV	0.765535		-0.152003	-1.32193								#N/A	#N/A	0	0	0		297.505	13.1957
YER118C	SHO1	Transmembrane osmosensor for filamentous growth and HOG pathways; involved in activation of the Cdc42p- and MAP kinase-dependent filamentous growth pathway and the high-osmolarity glycerol (HOG) response pathway; phosphorylated by Hog1p; interacts with Pbs2p, Msb2p, Hkr1p, and Ste11p	IV	2.65535	-0.736966	-3.32193	-3.32193								6	10	1	0	0	-0.251	70.1822	3.11291
YER088C-A		Dubious open reading frame; unlikely to encode a functional protein, based on available experimental and comparative sequence data; overlaps ORFs PTC2/YER089C and YER088W-B	IV	1.48543	-0.736966	-1.32193	-3.32193	-3.32193	-3.32193						#N/A	#N/A	0	0	0		22.0138	0.976414
YHR020W		Prolyl-tRNA synthetase; N-terminal domain shows weak homology to prokaryotic posttransfer editing domain, but does not possess posttransfer editing activity; may interact with ribosomes, based on co-purification experiments	IV	1.1375	-2.32193	-2.32193	-2.32193	-3.32193	-3.32193	-3.32193					5	8	0	1	0		483.811	21.4593
YPL026C	SKS1	Putative serine/threonine protein kinase; involved in the adaptation to low concentrations of glucose independent of the SNF3 regulated pathway; SKS1 has a paralog, VHS1, that arose from the whole genome duplication	IV	2.3505	1.48543	-3.32193									2	4	0	0	0	0.073	20.4578	0.907401
YGL245W	GUS1	Glutamyl-tRNA synthetase (GluRS); forms a complex with methionyl-tRNA synthetase (Mes1p) and Arc1p; complex formation increases the catalytic efficiency of both tRNA synthetases and ensures their correct localization to the cytoplasm; protein abundance increases in response to DNA replication stress	IV	0.925999	-3.32193	-3.32193									3	8	1	0	0		742.594	32.9375
YDR341C		Arginyl-tRNA synthetase; the authentic, non-tagged protein is detected in highly purified mitochondria in high-throughput studies; YDR341C has a paralog, MSR1, that arose from the whole genome duplication	IV	1.96347	1.20163	-2.32193	-2.32193						IV	III	5	5	0	0	0		344.397	15.2756
YBR292C		Dubious open reading frame; unlikely to encode a functional protein, based on available experimental and comparative sequence data; YBR292C is not an essential gene	IV	2.3505	0.137504							II			#N/A	#N/A	0	0	0		4.04129	0.17925
YEL038W	UTR4	Protein with sequence similarity to acireductone synthases; involved in methionine salvage; found in both the cytoplasm and nucleus	IV	0.678072	-0.514573	-2.32193	-2.32193	-3.32193							3	4	1	0	0	0.254	65.3714	2.89953
YBL063W	KIP1	Kinesin-related motor protein; required for mitotic spindle assembly, chromosome segregation, and 2 micron plasmid partitioning; functionally redundant with Cin8p for chromosomal but not plasmid functions	IV	1.32193	-0.152003	-1.73697							IV		7	8	0	1	1	-0.12	13.618	0.604024
YEL026W	SNU13	RNA binding protein; part of U3 snoRNP involved in rRNA processing, part of U4/U6-U5 tri-snRNP involved in mRNA splicing, similar to human 15.5K protein	IV	1.848	0.137504	-3.32193	-3.32193								9	10	0	0	0		885.08	39.2574
YJL014W	CCT3	Subunit of the cytosolic chaperonin Cct ring complex; related to Tcp1p, required for the assembly of actin and tubulins in vivo; capable of binding Q/N rich proteins and mediating their folding	IV	1.07039	0.263034	-0.321928	-2.32193	-2.32193	-2.32193	-2.32193					10	8	1	0	1	0.104	253.702	11.2529
YDR454C	GUK1	Guanylate kinase; converts GMP to GDP; required for growth and mannose outer chain elongation of cell wall N-linked glycoproteins	IV	4.43296	1.67807	-1.73697	-2.32193							III	6	6	0	0	0		483.376	21.44
YDR430C	CYM1	Lysine-specific metalloprotease of the pitrilysin family; metalloprotease of the intermembrane space; degrades proteins and presequence peptides cleaved from imported proteins; required for normal mitochondrial morphology	IV	1.48543								II	IV		5	9	1	0	1	-0.311	36.2181	1.60644
YJL097W	PHS1	Essential 3-hydroxyacyl-CoA dehydratase of the ER membrane; involved in elongation of very long-chain fatty acids; evolutionarily conserved, similar to mammalian PTPLA and PTPLB; involved in sphingolipid biosynthesis and protein trafficking	IV	2.40599	0.765535	-0.152003	-3.32193								6	6	0	0	0	0.008	115.505	5.1232
YNL312W	RFA2	Subunit of heterotrimeric Replication Protein A (RPA); RPA is a highly conserved single-stranded DNA binding protein involved in DNA replication, repair, and recombination; RPA protects against inappropriate telomere recombination, and upon telomere uncapping, prevents cell proliferation by a checkpoint-independent pathway; in concert with Sgs1p-Top2p-Rmi1p, stimulates DNA catenation/decatenation…	IV	1.96347	-1.32193										6	7	0	0	1	0.303	86.8676	3.85299
YOR326W	MYO2	Type V myosin motor involved in actin-based transport of cargos; required for the polarized delivery of secretory vesicles, the vacuole, late Golgi elements, peroxisomes, and the mitotic spindle; MYO2 has a paralog, MYO4, that arose from the whole genome duplication	IV	1.32193									II		9	8	0	0	0	-0.167	126.859	5.62679
YNL094W	APP1	Phosphatidate phosphatase, converts phosphatidate to diacylglycerol; App1p, Pah1p, Dpp1p, and Lpp1p are responsible for all the phosphatidate phosphatase activity; component of cortical actin patches; interacts with components of endocytic pathway	IV	1.88752	0.137504	-1.73697	-1.73697	-1.73697							5	5	1	0	0	-0.518	32.4912	1.44114
YNL248C	RPA49	RNA polymerase I subunit A49; essential for nucleolar assembly and for high polymerase loading rate; required for nucleolar localization of Rpa34p	IV	1.48543	0.485427	-3.32193									4	4	0	0	1	0.141	232.673	10.3201
YGL068W	MNP1	Mitochondrial ribosomal protein of the large subunit; has similarity to E. coli L7/L12 and human MRPL7 ribosomal proteins; associates with the mitochondrial nucleoid; required for normal respiratory growth	IV	0.925999								I			3	10	1	0	0	0.155	119.526	5.30155
YLR336C	SGD1	Essential nuclear protein; required for biogenesis of the small ribosomal subunit; has a possible role in the osmoregulatory glycerol response; putative homolog of human NOM1 which is implicated in acute myeloid leukemia	IV	1.63227	-3.32193	-3.32193	-3.32193	-3.32193							6	4	1	0	0	-0.228	40.2994	1.78747
YDR495C	VPS3	Component of CORVET membrane tethering complex; cytoplasmic protein required for the sorting and processing of soluble vacuolar proteins, acidification of the vacuolar lumen, and assembly of the vacuolar H+-ATPase	IV	3.18587	0.378512	-3.32193	-3.32193	-3.32193	-3.32193	-3.32193	-3.32193				3	4	0	0	0	-0.082	12.1598	0.539346
YGL030W	RPL3	Ribosomal 60S subunit protein L30; involved in pre-rRNA processing in the nucleolus; autoregulates splicing of its transcript; homologous to mammalian ribosomal protein L30, no bacterial homolog	IV	1.96347	0.263034	-1	-2.32193	-2.32193				III			6	5	1	0	0		1966.39	87.2186
YPR141C	KAR3	Minus-end-directed microtubule motor; functions in mitosis and meiosis, localizes to the spindle pole body and localization is dependent on functional Cik1p, required for nuclear fusion during mating; potential Cdc28p substrate	IV	3.48543	1.67807	-3.32193									7	9	1	0	1	0.243	16.2874	0.722421
YBR011C	IPP1	Cytoplasmic inorganic pyrophosphatase (PPase); homodimer that catalyzes the rapid exchange of oxygens from Pi with water, highly expressed and essential for viability, active-site residues show identity to those from E. coli PPase	IV	3.24793	2.80735	-1.73697	-3.32193					IV	IV	III	3	8	0	0	0		1566.28	69.4721
YER029C	SMB1	Core Sm protein Sm B; part of heteroheptameric complex (with Smd1p, Smd2p, Smd3p, Sme1p, Smx3p, and Smx2p) that is part of the spliceosomal U1, U2, U4, and U5 snRNPs; homolog of human Sm B and Sm B'	IV	1		-0.152003									7	8	0	0	0	-0.112	47.189	2.09305
YMR276W	DSK2	Nuclear-enriched ubiquitin-like polyubiquitin-binding protein; required for spindle pole body (SPB) duplication and for transit through the G2/M phase of the cell cycle; involved in proteolysis; interacts with the proteasome; protein abundance increases in response to DNA replication stress	IV	3.20163	-3.32193	-3.32193	-3.32193	-3.32193	-3.32193				IV	IV	3	3	0	0	0		173.803	7.70897
YKR046C	PET1	Protein of unknown function that localizes to lipid particles; localization suggests a role in lipid metabolism; expression pattern suggests a role in respiratory growth; computational analysis of large-scale protein-protein interaction data suggests a role in ATP/ADP exchange	IV	1.76554	-1.32193	-1.73697	-2.32193								4	3	0	0	0	0.101	13.1792	0.584558
YGR208W	SER2	Phosphoserine phosphatase of the phosphoglycerate pathway; involved in serine and glycine biosynthesis, expression is regulated by the available nitrogen source	IV	1	-2.32193	-2.32193									5	10	0	1	0	0.334	103.129	4.57425
YOR021C	SFM1	SPOUT methyltransferase; catalyzes omega-monomethylation of Rps3p on Arg-146; not an essential gene; predicted to be involved in rRNA processing and ribosome biogenesis and in biopolymer catabolism	IV	2.72247	1.53605	-1.32193	-2.32193	-3.32193				IV		III	9	5	1	0	0		222.251	9.85788
YLR355C	ILV5	Acetohydroxyacid reductoisomerase and mtDNA binding protein; involved in branched-chain amino acid biosynthesis and maintenance of wild-type mitochondrial DNA; found in mitochondrial nucleoids	IV	0.137504	-1	-1.32193	-2.32193	-3.32193					I		12	4	0	1	0		2361.37	104.738
YDR113C	PDS1	Securin; inhibits anaphase by binding separin Esp1p; blocks cyclin destruction and mitotic exit, essential for meiotic progression and mitotic cell cycle arrest; localization is cell-cycle dependent and regulated by Cdc28p phosphorylation	IV	0.584963											5	1	0	0	0	-0.104	21.8997	0.971355
YKR008W	RSC4	Component of the RSC chromatin remodeling complex; found in close proximity to nucleosomal DNA; displaced from the surface of nucleosomal DNA after chromatin remodeling; acetylated (K25) by Gcn5p, altering replication stress tolerance; contains tandem bromodomains that recognize histone H3 acetylated on K14 (H3K14ac) by Gcn5p	IV	2.16993	1.26303	-1.32193	-3.32193								7	11	1	0	2	0.016	41.7288	1.85087
YJR064W	CCT5	Subunit of the cytosolic chaperonin Cct ring complex; related to Tcp1p, required for the assembly of actin and tubulins in vivo	IV	2.29278	0.137504	-1.32193	-3.32193	-3.32193	-3.32193						6	7	1	0	2		297.486	13.1949
YER143W	DDI1	DNA damage-inducible v-SNARE binding protein; role in suppression of protein secretion; may play a role in S-phase checkpoint control; has ubiquitin-associated (UBA), ubiquitin-like (UBL), and retroviral-like proteinase (RVP) domains	IV	2.16993	1	-2.32193									5	9	1	0	0	0.101	31.1982	1.38379
YKL074C	MUD2	Protein involved in early pre-mRNA splicing; component of the pre-mRNA-U1 snRNP complex, the commitment complex; interacts with Msl5p/BBP splicing factor and Sub2p; similar to metazoan splicing factor U2AF65	IV	1.80736	-1.73697	-1.73697									5	7	0	0	0	0.112	30.8289	1.36741
YOL147C	PEX11	Peroxisomal protein required for medium-chain fatty acid oxidation; also required for peroxisome proliferation, possibly by inducing membrane curvature; localization regulated by phosphorylation; transcription regulated by Adr1p and Pip2p-Oaf1p	IV	1.1375	0.584963	-0.736966	-3.32193					IV	IV		6	5	0	0	0	0.212	30.0382	1.33234
YDR328C	SKP1	Evolutionarily conserved kinetochore protein; part of multiple protein complexes, including the SCF ubiquitin ligase complex, the CBF3 complex that binds centromeric DNA, and the RAVE complex that regulates assembly of the V-ATPase; protein abundance increases in response to DNA replication stress	IV	2.43296	1.48543	-0.152003	-2.32193	-3.32193	-3.32193						8	3	0	0	0	0.253	161.329	7.1557
YER004W	FMP52	Protein of unknown function; localized to the mitochondrial outer membrane; induced by treatment with 8-methoxypsoralen and UVA irradiation	IV	1	0.485427	-2.32193	-2.32193	-2.32193	-2.32193						7	6	0	1	0	0.13	80.2	3.55725
YDL157C		Putative protein of unknown function; the authentic, non-tagged protein is detected in highly purified mitochondria in high-throughput studies	IV	1.37851	-1.32193	-1.73697	-3.32193					IV			8	8	1	0	0	-0.377	137.018	6.07739
YNL247W		Cysteinyl-tRNA synthetase; may interact with ribosomes, based on co-purification experiments	IV	1.63227	0.847997	-0.736966	-3.32193								4	7	1	1	0	-0.479	187.145	8.30075
YPR117W		Putative protein of unknown function	IV	1.1375	-1	-1	-2.32193	-3.32193	-3.32193						13	6	0	1	0	0.018	14.4987	0.643085
YDR050C	TPI1	Triose phosphate isomerase, abundant glycolytic enzyme; mRNA half-life is regulated by iron availability; transcription is controlled by activators Reb1p, Gcr1p, and Rap1p through binding sites in the 5' non-coding region; inhibition of Tpi1p activity by PEP (phosphoenolpyruvate) stimulates redox metabolism in respiring cells; E104D mutation in human homolog TPI1 causes a rare autosomal disease; …	IV	0.847997	0.137504	-0.736966	-1.32193	-2.32193	-3.32193						10	5	0	1	0		4825.32	214.026
YEL021W	URA3	Orotidine-5'-phosphate (OMP) decarboxylase; catalyzes the sixth enzymatic step in the de novo biosynthesis of pyrimidines, converting OMP into uridine monophosphate (UMP); converts 5-FOA into 5-fluorouracil, a toxic compound	IV	2.67807	-1.73697	-1.73697	-1.73697						III		6	3	0	2	0		0.117289	0.00520233
YDR154C		Dubious open reading frame; unlikely to encode a functional protein, based on available experimental and comparative sequence data; null mutant exhibits synthetic phenotype with alpha-synuclein	IV	1.72247	1.1375	-0.736966	-1.73697	-2.32193	-2.32193	-3.32193				III	#N/A	#N/A	0	0	0		634.944	28.1627
YKL182W	FAS1	Beta subunit of fatty acid synthetase; complex catalyzes the synthesis of long-chain saturated fatty acids; contains acetyltransacylase, dehydratase, enoyl reductase, malonyl transacylase, and palmitoyl transacylase activities	IV	1.07039	0.678072	-2.32193	-3.32193					IV	II		7	6	0	1	0		698.947	31.0016
YBR079C	RPG1	eIF3a subunit of the eukaryotic translation initiation factor 3 (eIF3); subunit of the core complex of eIF3; essential for translation; part of a Prt1p-Rpg1p-Nip1p subcomplex that stimulates binding of mRNA and tRNA(i)Met to ribosomes; involved in translation reinitiation	IV	0.925999	0.925999	-0.514573	-2.32193	-3.32193					II		5	6	1	0	0	-0.067	253.67	11.2514
YGL221C	NIF3	Protein of unknown function; similar to Listeria monocytogenes major sigma factor (rpoD gene product); the authentic, non-tagged protein is detected in highly purified mitochondria in high-throughput studies	IV	0.765535	-0.321928	-0.736966						IV			4	4	0	0	0	0.343	123.812	5.49166
YLR008C	PAM18	Subunit of the import motor (PAM complex); the PAM complex is a component of the Translocase of the Inner Mitochondrial membrane (TIM23 complex); essential J-protein cochaperone that stimulates Ssc1p ATPase activity to drive import; inhibited by Pam16p	IV	2.07039	0.263034		-2.32193	-2.32193	-2.32193			II		IV	6	7	1	1	0	-0.07	133.815	5.93532
YBR141C	BMT2	Nucleolar S-adenosylmethionine-dependent rRNA methyltransferase; methylates adenine (m1A) of the large subunit (LSU) rRNA at position 2142; belongs to Rossmann fold superfamily; green fluorescent protein (GFP)-fusion protein localizes to the nucleolus; YBR141C is not an essential gene	IV	0.925999	-1	-1	-1	-3.32193	-3.32193	-3.32193	-3.32193				4	5	0	0	0	0.112	30.8854	1.36991
YGR262C	BUD32	Protein kinase; component of the EKC/KEOPS complex with Kae1p, Cgi121p, Pcc1p, and Gon7p; Pyrococcus Bud32 ortholog functions as a P-loop ATPase rather than a protein kinase in the context of the complex; EKC/KEOPS complex is required for t6A tRNA modification and telomeric TG1-3 recombination; may have role in transcription	IV	2.8679	-3.32193	-3.32193									4	5	1	0	1	0.362	44.953	1.99387
YOR332W	VMA4	Subunit E of the V1 domain of the vacuolar H+-ATPase (V-ATPase); V-ATPase is an electrogenic proton pump found throughout the endomembrane system; V1 domain has eight subunits; required for the V1 domain to assemble onto the vacuolar membrane; protein abundance increases in response to DNA replication stress	IV	3.03562	0.485427	-0.321928	-3.32193							IV	4	5	0	0	1		818.874	36.3209
YER120W	SCS2	Integral ER membrane protein, regulates phospholipid metabolism; one of 6 proteins (Ist2p, Scs2p, Scs22p, Tcb1p, Tcb2p, Tcb3p) that connect ER to plasma membrane (PM) and regulate PI4P levels by controlling access of Sac1p phosphatase to substrate PI4P in the PM; interacts with FFAT motifs in Opi1p, Swh1p, Osh2p, and Osh3p; involved in telomeric silencing; VAP homolog; SCS2 has a paralog, SCS22, …	IV	0.678072	-0.514573	-0.736966	-1.32193								7	5	0	2	0		368.916	16.3631
YKL205W	LOS1	Nuclear pore protein; involved in nuclear export of pre-tRNA and in re-export of mature tRNAs after their retrograde import from the cytoplasm	IV	1.32193	-0.514573	-0.514573	-0.514573	-3.32193	-3.32193	-3.32193					2	8	2	0	1	-0.093	76.0086	3.37134
YPL235W	RVB2	ATP-dependent DNA helicase, also known as reptin; member of the AAA+ and RuvB protein families, similar to Rvb1p; conserved component of multiple complexes including the INO80 complex, the Swr1 complex, and the R2TP complex (Rvb1-Rvb2-Tah1-Pih1); involved in multiple processes such as chromatin remodeling, box C/D snoRNP assembly, and RNA polymerase II assembly	IV	1.32193	0.137504	-1	-1.32193	-1.32193	-3.32193	-3.32193	-3.32193		IV		7	8	0	1	1	0.305	127.2	5.64191
YOR285W	RDL1	Thiosulfate sulfurtransferase; contains a rhodanese-like domain; localized to the mitochondrial outer membrane; protein abundance increases in response to DNA replication stress; similar to the human TSTD gene	IV	2.72247	0.847997	-1	-3.32193	-3.32193						III	8	5	0	0	0		225.589	10.0059
YDL155W	CLB3	B-type cyclin involved in cell cycle progression; activates Cdc28p to promote the G2/M transition; may be involved in DNA replication and spindle assembly; accumulates during S phase and G2, then targeted for ubiquitin-mediated degradation; relative distribution to the nucleus increases upon DNA replication stress; CLB3 has a paralog, CLB4, that arose from the whole genome duplication	IV	3.01792	1.07039	-3.32193	-3.32193								5	4	0	0	0	-0.162	50.1507	2.22442
YLR409C	UTP21	Subunit of U3-containing 90S preribosome and SSU processome complexes; involved in production of 18S rRNA and assembly of small ribosomal subunit; synthetic defect with STI1 Hsp90 cochaperone; human homolog linked to glaucoma; Small Subunit processome is also known as SSU processome	IV	2.7866	2.16993	-1	-3.32193	-3.32193					III		7	7	0	0	0	-0.168	107.507	4.76846
YJL140W	RPB4	RNA polymerase II subunit B32; forms dissociable heterodimer with Rpb7p; Rpb4/7 dissociates from RNAPII as Ser2 CTD phosphorylation increases; Rpb4/7 regulates cellular lifespan via mRNA decay process; involved in recruitment of 3'-end processing factors to transcribing RNAPII complex, export of mRNA to cytoplasm under stress conditions; also involved in translation initiation	IV	2.23266	-0.152003	-0.514573	-1	-3.32193							8	5	1	0	0	-0.2	115.305	5.11433
YPL093W	NOG1	Putative GTPase; associates with free 60S ribosomal subunits in the nucleolus and is required for 60S ribosomal subunit biogenesis; constituent of 66S pre-ribosomal particles; member of the ODN family of nucleolar G-proteins	IV	1.48543	0.263034	-2.32193	-3.32193						II	III	15	8	0	2	0	0.015	407.322	18.0666
YOR078W	BUD21	Component of small ribosomal subunit (SSU) processosome; this complex contains U3 snoRNA; required at post-transcriptional step for efficient retrotransposition; absence results in decreased Ty1 Gag:GFP protein levels; originally isolated as bud-site selection mutant that displays a random budding pattern	IV	2.23266	1.43296	-1.73697	-1.73697	-1.73697	-2.32193						5	4	0	0	0	0.133	133.392	5.91654
YNL281W	HCH1	Heat shock protein regulator; binds to Hsp90p and may stimulate ATPase activity; originally identified as a high-copy number suppressor of a HSP90 loss-of-function mutation; role in regulating Hsp90 inhibitor drug sensitivity; GFP-fusion protein localizes to the cytoplasm and nucleus; protein abundance increases in response to DNA replication stress	IV	1.926	-0.321928	-0.514573						II			4	5	0	0	0		247.249	10.9667
YGL147C	RPL9A	Ribosomal 60S subunit protein L9A; homologous to mammalian ribosomal protein L9 and bacterial L6; RPL9A has a paralog, RPL9B, that arose from a single-locus duplication	IV	1.1375	-0.321928	-2.32193									8	12	0	0	1		2954.48	131.045
YGR214W	RPSA	Ribosomal 40S subunit protein S0A; required for maturation of 18S rRNA along with Rps0Bp; deletion of either RPS0 gene reduces growth rate, deletion of both genes is lethal; homologous to human ribosomal protein SA and bacterial S2; RPS0A has a paralog, RPS0B, that arose from the whole genome duplication;	IV	1.72247	0.485427	-0.736966	-3.32193								10	9	0	1	0		1267.24	56.208
YDL144C		Protein of unknown function; green fluorescent protein (GFP)-fusion protein localizes to the cytoplasm and nucleus; YDL144C is not an essential gene; protein abundance increases in response to DNA replication stress	IV	1.63227											8	8	0	0	1	0.186	34.0758	1.51142
YCR003W	MRPL32	Mitochondrial ribosomal protein of the large subunit; protein abundance increases in response to DNA replication stress	IV	2.80735	-2.32193	-2.32193	-2.32193	-2.32193				II	III		5	8	1	0	1	-0.129	39.4864	1.75141
YGL190C	CDC55	Non-essential regulatory subunit B of protein phosphatase 2A (PP2A); localization to cytoplasm requires Zds1p and Zds2p and promotes mitotic entry; localization to nucleus prevents mitotic exit; required for correct nuclear division and chromosome segregation in meiosis; maintains nucleolar sequestration of Cdc14p during early meiosis; limits formation of PP2A-Rts1p holocomplexes to ensure timely…	IV	1.76554	0.847997	0.678072	-2.32193	-3.32193	-3.32193						7	3	0	0	0	0.102	60.5811	2.68705
YGR062C	COX18	Protein required for membrane insertion of C-terminus of Cox2p; mitochondrial integral inner membrane protein; interacts genetically and physically with Mss2p and Pnt1p; similar to S. cerevisiae Oxa1, N. crassa Oxa2p, and E. coli YidC	IV	1.07039	-0.514573	-0.514573	-0.514573					II			4	6	1	0	1	-0.017	19.6635	0.872167
YPR113W	PIS1	Phosphatidylinositol synthase; required for biosynthesis of phosphatidylinositol, which is a precursor for polyphosphoinositides, sphingolipids, and glycolipid anchors for some of the plasma membrane proteins	IV	0.765535	-2.32193	-2.32193	-3.32193								5	7	0	0	0		255.683	11.3407
YDR158W	HOM2	Aspartic beta semi-aldehyde dehydrogenase; catalyzes the second step in the common pathway for methionine and threonine biosynthesis; expression regulated by Gcn4p and the general control of amino acid synthesis	IV	0.378512	-0.321928	-1.32193	-1.32193	-3.32193	-3.32193	-3.32193					7	5	0	0	0		277.984	12.3299
YBL079W	NUP17	Subunit of the inner ring of the nuclear pore complex (NPC); contributes to NPC assembly and nucleocytoplasmic transport; both Nup170p and NUP157p are similar to human Nup155p; NUP170 has a paralog, NUP157, that arose from the whole genome duplication	IV	2.23266		-3.32193							II		8	10	0	0	0	0.214	80.7312	3.58081
YNL126W	SPC98	Component of the microtubule-nucleating Tub4p (gamma-tubulin) complex; interacts with Spc110p at the spindle pole body (SPB) inner plaque and with Spc72p at the SPB outer plaque	IV	2.20163	1.37851	-1.32193	-2.32193	-2.32193	-3.32193	-3.32193					7	7	0	0	0	-0.137	24.259	1.076
YDR512C	EMI1	Non-essential protein of unknown function; required for transcriptional induction of the early meiotic-specific transcription factor IME1, also required for sporulation; contains twin cysteine-x9-cysteine motifs; deletion affects mitochondrial morphology	IV	3.94486	-0.321928	-0.514573									8	5	0	1	0	-1.235	19.0138	0.843351
YOR091W	TMA46	Protein of unknown function that associates with translating ribosomes; interacts with GTPase Rbg1p	IV	1.72247		-3.32193	-3.32193	-3.32193				III	IV		4	6	1	0	0	-0.02	138.652	6.14985

## Sheet: GO Analyses
All Puf5p targets, Biological Process			Class I Puf5p targets, Biological Process			Class II Puf5p targets, Biological Process			Class III Puf5p targets, Biological Process			Class IV Puf5p targets, Biological Process
GO Term	p-value		GO Term	p-value		GO Term	p-value		GO Term	p-value		GO Term	p-value
cytoplasmic translation	1.27162e-27		cytoplasmic translation	1.23027e-08		gene expression	3.55669e-09		chromatin modification	0.00566284		cytoplasmic translation	1.48288e-07
ncRNA metabolic process	1.40008e-13		cellular component biogenesis	0.00554546		RNA metabolic process	1.10565e-08		chromosome organization	0.0425671		ncRNA metabolic process	0.0161502
ribonucleoprotein complex biogenesis	4.16272e-13		chromatin assembly or disassembly	0.0154615		ribosomal large subunit biogenesis	2.42763e-06
ribosome biogenesis	5.55561e-13					ribonucleoprotein complex biogenesis	6.04967e-06
gene expression	1.64247e-11					ribosome biogenesis	6.17107e-06
cellular component organization or biogenesis	1.87854e-11					cytoplasmic translation	6.23979e-06
cellular component biogenesis	3.12854e-11					nucleic acid metabolic process	6.25177e-06
RNA metabolic process	3.82992e-11					chromatin modification	2.02745e-05
macromolecular complex subunit organization	1.7842e-10					nucleobase-containing compound metabolic process	3.36347e-05
nucleobase-containing compound metabolic process	2.23945e-09					protein-DNA complex subunit organization	7.42638e-05
chromatin organization	2.81791e-09					chromatin remodeling	8.84047e-05
biosynthetic process	2.95257e-09					macromolecular complex subunit organization	0.000185358
chromatin remodeling	4.40315e-09					chromatin organization	0.000409659
organic substance biosynthetic process	5.3846e-09					heterocycle metabolic process	0.000435212
chromatin modification	8.48373e-09					ncRNA metabolic process	0.000477565
ribosomal small subunit biogenesis	2.56831e-08					cellular aromatic compound metabolic process	0.000528405
nucleic acid metabolic process	7.06742e-08					cellular nitrogen compound metabolic process	0.000618242
cellular biosynthetic process	8.68529e-08					cellular nitrogen compound biosynthetic process	0.000729727
maturation of SSU-rRNA	9.06394e-08					macromolecule biosynthetic process	0.000732376
cellular aromatic compound metabolic process	1.00239e-07					cellular macromolecule biosynthetic process	0.00105664
rRNA processing	1.00684e-07					regulation of gene expression	0.0011649
cellular macromolecule biosynthetic process	1.15725e-07					regulation of macromolecule biosynthetic process	0.00149594
ncRNA processing	1.28787e-07					cellular component biogenesis	0.00160105
organic cyclic compound metabolic process	1.40455e-07					regulation of nitrogen compound metabolic process	0.00194148
cellular nitrogen compound biosynthetic process	1.55984e-07					nitrogen compound metabolic process	0.00215305
macromolecule biosynthetic process	1.70178e-07					regulation of biosynthetic process	0.00223977
maturation of SSU-rRNA from tricistronic rRNA transcript (SSU-rRNA, 5.8S rRNA, LSU-rRNA)	2.32856e-07					transcription, DNA-templated	0.00232586
ribosomal large subunit biogenesis	2.4464e-07					regulation of cellular macromolecule biosynthetic process	0.00240821
rRNA metabolic process	2.59899e-07					nucleic acid-templated transcription	0.00243183
heterocycle metabolic process	3.78192e-07					organic cyclic compound metabolic process	0.00250859
nitrogen compound metabolic process	6.95106e-07					RNA biosynthetic process	0.00290647
regulation of nitrogen compound metabolic process	1.03745e-06					macromolecule metabolic process	0.00366844
ribonucleoprotein complex export from nucleus	1.89114e-06					cellular component organization or biogenesis	0.00418388
ribonucleoprotein complex localization	3.5486e-06					regulation of cellular biosynthetic process	0.00474622
regulation of gene expression	5.23938e-06					cellular macromolecule metabolic process	0.00510725
regulation of macromolecule biosynthetic process	6.49272e-06					nucleosome organization	0.00754003
regulation of macromolecule metabolic process	6.97186e-06					ATP-dependent chromatin remodeling	0.0121147
regulation of cellular macromolecule biosynthetic process	9.17759e-06					regulation of macromolecule metabolic process	0.0135412
cellular nitrogen compound metabolic process	1.04551e-05					rRNA processing	0.0145177
chromosome organization	1.09018e-05					RNA processing	0.023976
regulation of biosynthetic process	1.17202e-05					regulation of RNA metabolic process	0.026466
nuclear export	1.18023e-05					nucleobase-containing compound biosynthetic process	0.0272675
regulation of cellular biosynthetic process	1.85703e-05					ribosomal small subunit biogenesis	0.0282337
protein-DNA complex subunit organization	2.11407e-05					regulation of nucleobase-containing compound metabolic process	0.0343562
nucleobase-containing compound transport	2.9909e-05					ncRNA processing	0.0356776
regulation of primary metabolic process	3.39654e-05					rRNA metabolic process	0.0368224
nucleocytoplasmic transport	6.05207e-05					regulation of primary metabolic process	0.0410057
regulation of cellular metabolic process	6.21788e-05
nucleic acid transport	6.79221e-05
nuclear transport	7.56779e-05
RNA transport	0.000125475
establishment of RNA localization	0.000125475
RNA biosynthetic process	0.000134271
DNA-templated transcription, elongation	0.000134819
transcription, DNA-templated	0.000249778
nucleic acid-templated transcription	0.000274817
regulation of metabolic process	0.000385576
transcription from RNA polymerase I promoter	0.000851869
RNA processing	0.000930082
maturation of 5.8S rRNA	0.0012964
maturation of 5.8S rRNA from tricistronic rRNA transcript (SSU-rRNA, 5.8S rRNA, LSU-rRNA)	0.0012964
regulation of nucleobase-containing compound metabolic process	0.00160736
regulation of cellular amide metabolic process	0.00187013
nucleosome organization	0.00188331
primary metabolic process	0.00201522
organonitrogen compound biosynthetic process	0.00202571
peptide biosynthetic process	0.00244605
translation	0.00286192
transcription elongation from RNA polymerase II promoter	0.00328568
regulation of translational elongation	0.00367339
cellular macromolecule metabolic process	0.00393711
amide biosynthetic process	0.00510415
nucleobase-containing compound biosynthetic process	0.0053206
RNA export from nucleus	0.00580981
RNA localization	0.00700221
regulation of translation	0.00700221
maturation of LSU-rRNA	0.00727812
cellular component organization	0.00785466
chromatin assembly or disassembly	0.00969411
regulation of RNA metabolic process	0.0115721
peptide metabolic process	0.0128645
macromolecule metabolic process	0.0131448
negative regulation of gene expression	0.0135081
regulation of cellular process	0.0157795
posttranscriptional regulation of gene expression	0.0166598
macromolecular complex assembly	0.0213121
organelle organization	0.0245008
ncRNA transcription	0.0257529
rRNA-containing ribonucleoprotein complex export from nucleus	0.0258733
negative regulation of nitrogen compound metabolic process	0.0329157
organic cyclic compound biosynthetic process	0.0349187
protein complex subunit organization	0.03672
regulation of translational fidelity	0.0372318
cellular amide metabolic process	0.0388264
regulation of transcription, DNA-templated	0.0462621
