# Supplementary material
Source: HighWire-hosted journal article supplement (doi:10.1101/rna.062687.117)
Supplement: Supplemental_Data_4_PUF3.xlsx [file Supplemental_Data_4_PUF3.xlsx]

## Sheet: Key
Column header	Description
PUF3 targets	Systematic name of Puf3p target gene
Name	Name of Puf3p target
Description	Gene description
Class	Puf3p target class for this gene
Mean TRPM U1	Mean number of TRPM detected with at least 1 U in the Utag
Mean TRPM U2	Mean number of TRPM detected with at least 2 U's in the Utag
Mean TRPM U3	Mean number of TRPM detected with at least 3 U's in the Utag
Mean TRPM U4	Mean number of TRPM detected with at least 4 U's in the Utag
Mean TRPM U5	Mean number of TRPM detected with at least 5 U's in the Utag
Mean TRPM U6	Mean number of TRPM detected with at least 6 U's in the Utag
Mean TRPM U7	Mean number of TRPM detected with at least 7 U's in the Utag
Mean TRPM U8	Mean number of TRPM detected with at least 8 U's in the Utag
PBE from MEME	Enriched sequence present in 3' UTR of target mRNA identified via MEME
PUF4 Target class	Class of this target in the Puf4p data set
PUF5 Target class	Class of this target in the Puf5p data set
log2 RNA decay rate FC (deltaPUF3/WT)	Fold change (log2) of mRNA decay rate (deltaPUF3 strain / wild-type strain); data mined from Sun et al. 2013.
8BE conservation score	Conservation score of the PBE across 16 yeast species (16 fully conserved, 0 not present in any species)
RNAseq FPKM	Mean FPKM value from RNAseq data of BY4742 yeast strain, mined from Lapointe et al. 2015.
Estimated RNA molecules per cell	Number of estimated mRNA molecules per cell, based off RNAseq (FPKM) and an estimated 36,000 total mRNAs per cell

## Sheet: Puf3p Classes
PUF3 targets	Name	Description	Class	Mean TRPM U1 (log2)	Mean TRPM U2 (log2)	Mean TRPM U3 (log2)	Mean TRPM U4 (log2)	Mean TRPM U5 (log2)	Mean TRPM U6 (log2)	Mean TRPM U7 (log2)	Mean TRPM U8 (log2)	PBE from MEME	PUF4 Target Class	PUF5 Target Class	log2 RNA decay rate FC (deltaPUF3/WT)	8BE conservation score	RNAseq FPKM	Estimated RNA molecules per cell
YHR005C-A	TIM10	Essential protein of the mitochondrial intermembrane space; forms a complex with Tim9p (TIM10 complex) that delivers hydrophobic proteins to the TIM22 complex for insertion into the inner membrane	I	11.8331	11.6499	11.3396	10.9068	10.2199	9.1533	7.61545	5.73335	CCUGUAUAUA			NA	12	246.63	10.9392
YKR085C	MRPL20	Mitochondrial ribosomal protein of the large subunit	I	10.6122	10.4453	10.1971	9.84408	9.25526	8.27193	6.8936	5.30378	CGUGUAAAUA			-1.038	15	57.3536	2.5439
YOL027C	MDM38	Mitochondrial protein; forms a complex with Mba1p to facilitate recruitment of mRNA-specific translational activators to ribosomes; roles in protein export and K+/H+ exchange; human ortholog Letm1 implicated in Wolf-Hirschhorn syndrome	I	10.4219	10.2319	10.001	9.63154	9.16817	8.47452	7.59171	6.44956	CAUGUAUAUA	II	III	-0.307	5	81.8506	3.63046
YNR022C	MRPL50	Mitochondrial ribosomal protein of the large subunit; not essential for mitochondrial translation	I	13.0494	12.9336	12.7611	12.4245	11.8419	10.7659	9.24508	7.57667	CUUGUAUAUA			-1.088	12	58.4358	2.5919
YML009C	MRPL39	Mitochondrial ribosomal protein of the large subunit	I	11.0791	10.9998	10.872	10.6344	10.2032	9.40642	8.3097	7.00563	CCUGUAAAUA			-0.931	12	72.4803	3.21484
YLR390W	ECM19	Putative protein of unknown function; the authentic, non-tagged protein is detected in highly purified mitochondria in high-throughput studies	I	10.6024	10.5124	10.3544	10.1576	9.86805	9.35337	8.49745	7.37851	CCUGUAUAUA			-0.464	5	43.7527	1.94063
YLR109W	AHP1	Thiol-specific peroxiredoxin; reduces hydroperoxides to protect against oxidative damage; function in vivo requires covalent conjugation to Urm1p	I	13.5924	13.2285	12.8077	12.1118	11.0732	9.85175	8.16239	6.3345	UGUAUAAAUA		II	NA	9	3208.18	142.298
YOR286W	RDL2	Protein with rhodanese activity; contains a rhodanese-like domain similar to Rdl1p, Uba4p, Tum1p, and Ych1p; overexpression causes a cell cycle delay; null mutant displays elevated frequency of mitochondrial genome loss	I	11.4601	11.2469	10.9046	10.4668	9.83731	8.83542	7.52513	6.2724	CCUGUAUAUA			-0.723	5	122.96	5.45387
YGR215W	RSM27	Mitochondrial ribosomal protein of the small subunit	I	11.5897	11.4969	11.363	11.1291	10.8462	10.4022	9.77083	8.8933	CAUGUACAUA			-1.324	14	47.5885	2.11077
YJL096W	MRPL49	Mitochondrial ribosomal protein of the large subunit	I	10.3463	10.2019	9.97699	9.60381	9.10198	8.30606	7.18487	5.77347	CAUGUAAAUA			-0.914	15	74.9405	3.32396
YOR187W	TUF1	Mitochondrial translation elongation factor Tu; comprises both GTPase and guanine nucleotide exchange factor activities, while these activities are found in separate proteins in S. pombe and humans	I	10.6201	10.4776	10.3004	9.97943	9.42228	8.42543	6.99774	5.42291	CGUGUAAAUA	IV		-0.918	15	193.493	8.58232
YNL131W	TOM22	Component of the TOM (Translocase of Outer Membrane) complex; responsible for initial import of mitochondrially directed proteins; mediates interaction between TOM and TIM complexes and acts as a receptor for precursor proteins	I	11.6924	11.4887	11.2066	10.8997	10.4743	9.77857	8.82209	7.58946	CUUGUACAUA		II	-0.251	11	280.284	12.4319
YDR511W	SDH7	Mitochondrial protein involved in assembly of succinate dehydrogenase; has a role in maturation of the Sdh2p subunit; localized to the mitochondrial intermembrane space; required for acetate utilization and gluconeogenesis; mutation in Drosophila ortholog SDHAF3 causes reduced succinate dehydrogenase activity and neuronal and muscular dysfunction; member of the LYR protein family	I	12.1387	12.0562	11.9452	11.7668	11.4975	11.0086	10.284	9.26796	CUUGUAAAUA			-0.714	11	34.7992	1.54351
YLL009C	COX17	Copper metallochaperone that transfers copper to Sco1p and Cox11p; eventual delivery to cytochrome c oxidase; contains twin cysteine-x9-cysteine motifs; human homolog COX17 partially complements yeast null mutant	I	12.1417	12.0259	11.8489	11.586	11.2247	10.6177	9.69975	8.53605	CUUGUAUAUA			-2.525	13	87.6334	3.88695
YKL137W	CMC1	Copper-binding protein of the mitochondrial intermembrane space; evolutionarily conserved; may be involved in delivering copper from the matrix to the cytochrome c oxidase complex; contains a twin CX9C motif	I	10.5464	10.4514	10.3085	10.1132	9.83621	9.37221	8.53489	7.4733	CUUGUACAUA			-1.072	14	58.2145	2.58208
YMR225C	MRPL44	Mitochondrial ribosomal protein of the large subunit; protein abundance increases in response to DNA replication stress	I	11.2697	11.1423	10.9522	10.6429	10.0982	9.09777	7.5812	5.81762	CCUGUAAAUA		III	-1.527	13	33.7441	1.49671
YML129C	COX14	Mitochondrial cytochrome c oxidase (complex IV) assembly factor; also involved in translational regulation of Cox1p and prevention of Cox1p aggregation before assembly; associates with complex IV assembly intermediates and complex III/complex IV supercomplexes; located in the mitochondrial membrane	I	11.1116	11.02	10.9424	10.813	10.5807	10.1752	9.51037	8.59134	CCUGUAUAUA	II		-0.392	4	72.8515	3.2313
YLR259C	HSP60	Tetradecameric mitochondrial chaperonin; required for ATP-dependent folding of precursor polypeptides and complex assembly; prevents aggregation and mediates protein refolding after heat shock; role in mtDNA transmission; phosphorylated	I	12.5962	12.4604	12.2061	11.8779	11.4296	10.7202	9.64061	8.35579	CUUGUAAAUA		IV	NA	14	566.234	25.1151
YOR020C	HSP10	Mitochondrial matrix co-chaperonin; inhibits the ATPase activity of Hsp60p, a mitochondrial chaperonin; involved in protein folding and sorting in the mitochondria; 10 kD heat shock protein with similarity to E. coli groES	I	16.1061	15.856	15.4724	14.959	14.3958	13.6775	12.5457	11.3917	CCUGUAAAUA			NA	11	796.579	35.332
YLR218C	COA4	Twin Cx(9)C protein involved in cytochrome c oxidase organization; organization includes assembly or stability; localizes to the mitochondrial intermembrane space via the Mia40p-Erv1p system; interacts genetically with CYC1 and with cytochrome c oxidase assembly factors	I	10.463	10.3282	10.1131	9.80558	9.30606	8.51806	7.47897	6.23266	CUUGUAUAUA	IV	II	-1.124	10	8.3326	0.36959
YEL020W-A	TIM9	Essential protein of the mitochondrial intermembrane space; forms a complex with Tim10p (TIM10 complex) that delivers hydrophobic proteins to the TIM22 complex for insertion into the inner membrane	I	10.0181	9.94544	9.83337	9.63499	9.34762	8.8558	8.1236	7.19476	CAUGUAAAUA		III	-0.659	13	94.6532	4.19831
YKL138C	MRPL31	Mitochondrial ribosomal protein of the large subunit	I	8.06878	7.88509	7.66178	7.21626	6.7211	5.8802	4.59096	3.27799	UCUGUAUAUA			-1.228	14	85.6491	3.79894
YDL202W	MRPL11	Mitochondrial ribosomal protein of the large subunit; localizes to vacuole in response to H2O2	I	8.41659	8.26116	8.09276	7.90448	7.45368	6.78398	5.70874	4.59694	CAUGUACAUA			-0.445	12	40.5753	1.79971
YJR135W-A	TIM8	Mitochondrial intermembrane space protein; forms a complex with Tim13p that delivers a subset of hydrophobic proteins to the TIM22 complex for inner membrane insertion; homolog of human TIMM8A, implicated in Mohr-Tranebjaerg syndrome, also known as deafness-dystonia-optic neuronopathy (DDON) syndrome; human TIMM8A can complement yeast null mutant	I	10.032	9.78316	9.42501	8.96607	8.36326	7.43962	6.12101	4.853	UCUGUAAAUA			-0.954	14	121.041	5.36873
YBR262C	MIC12	Component of the MICOS complex; MICOS (formerly MINOS or MitOS) is a mitochondrial inner membrane complex that extends into the intermembrane space and has a role in the maintenance of crista junctions, inner membrane architecture, and formation of contact sites to the outer membrane; forms a subcomplex with Mic10p and Mic27p whose assembly and stability requires cardiolipin	I	8.30879	7.93781	7.58496	7.11061	6.5744	5.57289	4.45943	3.30743	CAUGUAUAUA			-0.337	6	77.658	3.4445
YNR017W	TIM23	Essential component of the TIM23 complex; involved in protein import into mitochondrial matrix and inner membrane; with Tim17p, contributes to architecture and function of the import channel; TIM23 complex is short for the translocase of the inner mitochondrial membrane	I	7.88081	7.65607	7.41024	7.13134	6.75756	6.17792	5.39917	4.54844	CUUGUAUAUA			-0.337	13	135.906	6.02808
YLR069C	MEF1	Mitochondrial elongation factor involved in translational elongation	I	7.51254	7.41193	7.2817	7.03232	6.59694	6.04439	5.34341	4.2854	CUUGUAAAUA			-1.39	12	32.7417	1.45225
YDR493W	MZM1	Protein required for assembly of the cytochrome bc(1) complex; acts as a chaperone for Rip1p and facilitates its insertion into the complex at a late stage of assembly; localized to the mitochondrial matrix; null mutant exhibits a respiratory growth defect and reduced mitochondrial zinc levels, which is characteristic of mutations affecting bc(1) complex assembly; member of the LYR protein family…	I	8.03122	7.90569	7.70943	7.47411	7.0607	6.23458	5.08321	3.82782	CAUGUAAAUA		IV	-1.276	14	35.5073	1.57492
YGR220C	MRPL9	Mitochondrial ribosomal protein of the large subunit	I	9.72195	9.60344	9.38651	9.0677	8.55459	7.71699	6.48704	4.98641	CAUGUACAUA			-0.713	16	56.9087	2.52416
YKR006C	MRPL13	Mitochondrial ribosomal protein of the large subunit; not essential for mitochondrial translation	I	7.57894	7.46434	7.3505	7.11686	6.79442	6.22304	5.16189	4.09592	CCUGUACAUA			-0.904	14	67.0181	2.97257
YDR322W	MRPL35	Mitochondrial ribosomal protein of the large subunit	I	8.32418	8.22062	8.06286	7.75154	7.33807	6.40259	5.01792	3.12101	CCUGUACAUA	III		-0.64	14	50.3294	2.23234
YJL063C	MRPL8	Mitochondrial ribosomal protein of the large subunit	I	9.12283	8.979	8.69418	8.33584	7.77215	6.93192	5.78398	4.47897	CUUGUAAAUA			-1.039	15	42.1419	1.86919
YOR150W	MRPL23	Mitochondrial ribosomal protein of the large subunit; localizes to vacuole in response to H2O2	I	7.95942	7.84046	7.6837	7.42878	6.98869	6.26866	5.33628	4.23266	CAUGUAUAUA			-0.58	15	70.1195	3.11013
YNR040W	0	Putative protein of unknown function; the authentic, non-tagged protein is detected in highly purified mitochondria in high-throughput studies	I	7.94193	7.85984	7.67525	7.4271	6.97957	6.14975	5.17393	4.12101	CAUGUAAAUA			-0.608	13	23.3626	1.03624
YER154W	OXA1	Mitochondrial inner membrane insertase; mediates the insertion of both mitochondrial- and nuclear-encoded proteins from the matrix into the inner membrane; also has a role in insertion of carrier proteins into the inner membrane; acts as a voltage-gated ion channel, activated by substrate peptides; interacts with mitochondrial ribosomes; conserved from bacteria to animals	I	8.47614	8.35005	8.14924	7.85549	7.44874	6.76951	5.75756	4.52356	UCUGUAAAUA		IV	-0.469	16	67.0113	2.97227
YDR115W	0	Putative mitochondrial ribosomal protein of the large subunit; similar to E. coli L34 ribosomal protein; required for respiratory growth, as are most mitochondrial ribosomal proteins; protein increases in abundance and relocalizes to the plasma membrane upon DNA replication stress	I	9.75756	9.59824	9.36392	8.99859	8.44584	7.62644	6.53605	5.40599	CUUGUACAUA			-1.018	14	65.2023	2.89203
YPR133W-A	TOM5	Component of the TOM (translocase of outer membrane) complex; responsible for recognition and initial import of all mitochondrially directed proteins; involved in transfer of precursors from the Tom70p and Tom20p receptors to the Tom40p pore	I	8.87529	8.75121	8.58158	8.32238	7.85549	7.01903	5.89724	4.61471	CGUGUAAAUA			-0.787	3	313.872	13.9217
YDR316W	OMS1	Protein integral to the mitochondrial membrane; has a conserved methyltransferase motif and is predicted to be an RNA methyltransferase; multicopy suppressor of respiratory defects caused by OXA1 mutations	I	7.96058	7.82909	7.62205	7.3156	6.78267	6.10224	5.03562	3.65535	CGUGUAAAUA			-0.932	15	12.0764	0.535644
YGR082W	TOM20	Component of the TOM (translocase of outer membrane) complex; responsible for recognition and initial import steps for all mitochondrially directed proteins; acts as a receptor for incoming precursor proteins	I	9.43879	9.24508	8.86419	8.4292	7.74685	6.66534	5.12928	3.63227	UCUGUAUAUA	IV		-0.868	12	181.442	8.04779
YJL143W	TIM17	Essential component of the TIM23 complex; with Tim23p, contributes to the architecture and function of the import channel; may link the import motor to the core Translocase of the Inner Mitochondrial membrane (TIM23 complex)	I	8.84172	8.6851	8.48059	8.10539	7.56834	6.69766	5.34696	3.89724	CAUGUACAUA			NA	13	81.6769	3.62275
YBR268W	MRPL37	Mitochondrial ribosomal protein of the large subunit	I	10.3959	10.2401	9.96593	9.54342	8.83447	7.732	6.35226	4.62059	CUUGUAAAUA			-1.057	16	63.4802	2.81564
YHR116W	COX23	Protein that functions in mitochondrial copper homeostasis; mitochondrial intermembrane space protein; essential for functional cytochrome oxidase expression; homologous to Cox17p; contains twin cysteine-x9-cysteine motifs	I	9.27216	9.00113	8.66853	8.41363	7.90749	6.97039	5.56986	4.01792	UAUGUAAAUA			NA	9	14.0712	0.624124
YNR037C	RSM19	Mitochondrial ribosomal protein of the small subunit; has similarity to E. coli S19 ribosomal protein	I	7.61029	7.56148	7.48059	7.30743	7.04658	6.56529	5.80993	4.7761	CAUGUAAAUA			-1.435	15	83.5294	3.70492
YPL013C	MRPS16	Mitochondrial ribosomal protein of the small subunit	I	9.50641	9.20799	8.83826	8.33985	7.85362	7.22978	6.12101	4.74416	CUUGUAAAUA		III	-0.825	14	61.3374	2.7206
YBR146W	MRPS9	Mitochondrial ribosomal protein of the small subunit	I	8.61324	8.42417	8.02459	7.55919	6.95187	6.14364	4.848	3.64386	CCUGUAAAUA			-1.308	17	72.4543	3.21369
YJR034W	PET191	Protein required for assembly of cytochrome c oxidase; exists as an oligomer; described as both an integral mitochondrial inner membrane protein facing the intermembrane space (IMS) and as a soluble IMS protein; contains a twin Cx9C motif; imported into the IMS via the MIA import machinery	I	8.83226	8.70494	8.54998	8.31016	7.84549	6.87897	5.51096	4.18587	CCUGUAAAUA			-0.987	10	29.8823	1.32542
YDL045W-A	MRP10	Mitochondrial ribosomal protein of the small subunit; contains twin cysteine-x9-cysteine motifs; oxidized by Mia40p during import into mitochondria	I	8.24413	8.11842	7.96174	7.66035	7.1819	6.34873	4.99095	3.36457	CUUGUAUAUA		IV	-0.757	13	77.0667	3.41827
YCR046C	IMG1	Mitochondrial ribosomal protein of the large subunit; required for respiration and for maintenance of the mitochondrial genome	I	10.2245	10.0028	9.62936	9.10774	8.4208	7.33539	5.92363	4.22497	CCUGUAUAUA	III		-1.105	14	48.3089	2.14273
YDR337W	MRPS28	Mitochondrial ribosomal protein of the small subunit	I	8.44997	8.26819	8.03782	7.6872	7.19574	6.49985	5.64097	4.61471	CUUGUAAAUA			-1.317	14	41.7365	1.85121
YNL122C	0	Mitochondrial ribosomal protein of the large subunit; homologous to bacterial L35 and human MRPL35 ribosomal proteins	I	8.37547	8.2937	8.19771	8.04821	7.7286	7.18884	6.22882	4.8125	CAUGUAUAUA			-0.724	9	36.0432	1.59868
YKL053C-A	MDM35	Mitochondrial intermembrane space protein; mutation affects mitochondrial distribution and morphology; contains twin cysteine-x9-cysteine motifs; protein abundance increases in response to DNA replication stress	I	8.8275	8.73369	8.58684	8.37591	7.96	7.18388	6.03562	4.63807	CAUGUAAAUA			-0.975	8	73.6969	3.2688
YGL068W	MNP1	Mitochondrial ribosomal protein of the large subunit; has similarity to E. coli L7/L12 and human MRPL7 ribosomal proteins; associates with the mitochondrial nucleoid; required for normal respiratory growth	I	9.87575	9.71716	9.46557	9.09038	8.41954	7.43296	6.06393	4.56682	CAUGUAAAUA		IV	-1.034	16	119.526	5.30155
YKL003C	MRP17	Mitochondrial ribosomal protein of the small subunit; MRP17 exhibits genetic interactions with PET122, encoding a COX3-specific translational activator	I	9.80752	9.68615	9.51491	9.25692	8.85331	8.05637	6.85549	5.25172	CAUGUAAAUA			-0.771	14	54.5454	2.41934
YBR282W	MRPL27	Mitochondrial ribosomal protein of the large subunit; homolog of human Bcl-2 interacting protein BMRP	I	10.0641	9.94193	9.77166	9.44336	8.95391	8.16138	7.17293	5.69209	CGUGUAAAUA			-1.226	15	39.3967	1.74743
YGR076C	MRPL25	Mitochondrial ribosomal protein of the large subunit; mutation confers increased replicative lifespan	I	8.66888	8.49985	8.36981	8.17143	7.80671	7.12722	6.1416	4.79181	CAUGUAAAUA			-0.432	16	40.8876	1.81356
YPL029W	SUV3	ATP-dependent RNA helicase; component of the mitochondrial degradosome along with the RNase Dss1p; the degradosome associates with the ribosome and mediates RNA turnover; also required during splicing of the COX1 AI5_beta intron	II	6.69627	6.50621	6.31651	5.98869	5.45286	4.41278	3.07039	1.37851	CCUGUAAAUA			-0.582	14	21.6087	0.958447
YMR203W	TOM40	Component of the TOM (translocase of outer membrane) complex; responsible for recognition and initial import steps for all mitochondrially directed proteins; constitutes the core element of the protein conducting pore; pre-Tom40p is phosphorylated by PKA, which impairs its import into mitochondria under non-respiratory conditions	II	6.2854	6.17592	5.95884	5.62352	5.03562	4.22497	3.10434	1.53605	UAUGUAUAUA			0.044	9	205.337	9.10766
YPR047W	MSF1	Mitochondrial phenylalanyl-tRNA synthetase; active as a monomer, unlike the cytoplasmic subunit which is active as a dimer complexed to a beta subunit dimer; similar to the alpha subunit of E. coli phenylalanyl-tRNA synthetase	II	7.2075	7.02015	6.69488	6.28355	5.58796	4.85798	3.74416	2.56072	CUUGUAAAUA			-1.172	16	10.8302	0.48037
YBR251W	MRPS5	Mitochondrial ribosomal protein of the small subunit	II	7.34607	7.07039	6.64097	6.22689	5.6865	4.87283	3.24793	1.72247	CCUGUAAAUA			-1.265	17	39.2333	1.74018
YJL205C	NCE101	Protein of unknown function; involved in secretion of proteins that lack classical secretory signal sequences	II	7.70874	7.46271	7.2724	6.94134	6.1819	4.62059	2.65535	0.263034	UAUGUAAAUA			-0.235	3	21.207	0.94063
YDR296W	MHR1	Mitochondrial ribosomal protein of the large subunit; also involved in homologous recombination in mitochondria; required for recombination-dependent mtDNA partitioning; involved in stimulation of mitochondrial DNA replication in response to oxidative stress	II	7.55842	7.34607	7.19574	6.91528	6.41109	5.51412	4.41954	2.7866	CAUGUAAAUA			-1.285	15	52.9096	2.34679
YDR405W	MRP20	Mitochondrial ribosomal protein of the large subunit	II	6.58796	6.41616	6.2854	6.15987	5.8125	5.24793	4.26303	2.67807	CUUGUAUAUA			-0.284	14	24.2533	1.07575
YKL087C	CYT2	Cytochrome c1 heme lyase; involved in maturation of cytochrome c1, which is a subunit of the mitochondrial ubiquinol-cytochrome-c reductase; links heme covalently to apocytochrome c1	II	6.7879	6.6453	6.49506	6.29462	5.88509	5.30378	4.2854	3.18587	CCUGUAAAUA			-0.871	14	26.2631	1.16489
YDL104C	QRI7	Protein involved in threonylcarbamoyl adenosine biosynthesis; Sua5p and Qri7p are necessary and sufficient for RNA t6A modification in vitro; highly conserved mitochondrial protein; essential for t6A modification of mitochondrial tRNAs that decode ANN codons; similar to Kae1p and E. coli YgjD, both of which are also required for tRNA t6A modification; when directed to the cytoplasm, complements t…	II	6.01123	5.90207	5.64386	5.4363	4.87283	4.3147	3.44626	2.51096	ACUGUACAUA			NA	13	6.69603	0.297
YOR205C	GEP3	Protein required for mitochondrial ribosome small subunit biogenesis; null mutant is defective in respiration and in maturation of 15S rRNA; protein is localized to the mitochondrial inner membrane; null mutant interacts synthetically with prohibitin (Phb1p)	II	7.33539	7.14873	6.92125	6.49345	5.98413	5.10852	3.75489	2.23266	CAUGUAAAUA			-0.108	14	25.1241	1.11437
YER058W	PET117	Protein required for assembly of cytochrome c oxidase	II	6.2854	6.03122	5.72247	5.31832	4.67242	3.74416	2.76553	1.48543	UUUGUAUAUA		I	-1.797	13	11.4322	0.507074
YJR045C	SSC1	Hsp70 family ATPase; constituent of the import motor component of the Translocase of the Inner Mitochondrial membrane (TIM23 complex); involved in protein translocation and folding; subunit of SceI endonuclease; SSC1 has a paralog, ECM10, that arose from the whole genome duplication	II	8.23074	7.89603	7.38629	6.66249	5.64097	4.39917	3.20163	2.07039	CUUGUAAUUA		IV	NA	7	673.134	29.8566
YJL104W	PAM16	Subunit of the import motor (PAM complex); the PAM complex is a component of the Translocase of the Inner Mitochondrial membrane (TIM23 complex); forms a 1:1 subcomplex with Pam18p and inhibits its cochaperone activity; contains a J-like domain	II	8.31107	8.07307	7.72178	7.22497	6.37504	4.87283	2.76553	0.137504	CUUGUAUUUA		III	-1.085	13	81.0308	3.59409
YBR122C	MRPL36	Mitochondrial ribosomal protein of the large subunit; overproduction suppresses mutations in the COX2 leader peptide-encoding region	II	6.59246	6.35931	5.98413	5.48864	4.97728	3.93546	2.80735	0.765535	CUUGUAUAUA			-0.63	14	77.7781	3.44982
YPL059W	GRX5	Glutathione-dependent oxidoreductase; hydroperoxide and superoxide-radical responsive; mitochondrial matrix protein involved in the synthesis/assembly of iron-sulfur centers; monothiol glutaredoxin subfamily member along with Grx3p and Grx4p	II	7.1416	6.92718	6.62352	6.2817	5.70598	4.79701	3.60881	2.51096	CUUGUAAAUA			-0.287	9	103.199	4.57736
YDR347W	MRP1	Mitochondrial ribosomal protein of the small subunit; MRP1 exhibits genetic interactions with PET122, encoding a COX3-specific translational activator, and with PET123, encoding a small subunit mitochondrial ribosomal protein	II	7.17891	6.96347	6.72928	6.3733	5.82273	4.57289	2.45943	0.263034	UCUGUAAAUA		IV	-0.701	15	69.4568	3.08073
YGR231C	PHB2	Subunit of the prohibitin complex (Phb1p-Phb2p); prohibitin is a 1.2 MDa ring-shaped inner mitochondrial membrane chaperone that stabilizes newly synthesized proteins; determinant of replicative life span; involved in mitochondrial segregation; prohibitin deficiency induces a mitochondrial unfolded protein response (mtUPR)	II	7.96521	7.61545	7.16892	6.48059	5.48864	4.3505	2.72247	1.43296	CUUGUGAAUA			-0.428	13	110.664	4.90847
YCR003W	MRPL32	Mitochondrial ribosomal protein of the large subunit; protein abundance increases in response to DNA replication stress	II	7.35403	7.09276	6.79572	6.32733	5.74147	4.98641	4.16189	2.96347	CCUGUAUAUA	III	IV	-0.56	15	39.4864	1.75141
YMR024W	MRPL3	Mitochondrial ribosomal protein of the large subunit; located in close proximity to the polypeptide exit channel of the ribosome; mutations in human homolog MRPL44 cause childhood cardiomyopathy; human MRPL44 deficiency results in inefficient assembly of the mitochondrial ribosome, and in tissue-specific respiratory chain deficiency, manifesting as either Complex I+Complex IV or Complex IV defici…	II	7.3637	7.1416	6.80736	6.43129	5.81762	5.22882	4.1127	3.01792	CUUGUACAUA			-0.721	15	44.1213	1.95699
YMR244C-A	COA6	Protein involved in cytochrome c oxidase (Complex IV) assembly; involved in delivery of copper to Complex IV; also required for efficient formation of respiratory supercomplexes comprised of Complexes III and IV; localizes to the mitochondrial intermembrane space; ortholog implicated in cardiac defects in zebrafish and human; transcription is induced in response to the DNA-damaging agent MMS; pro…	II	6.04002	5.7252	5.51412	5.20945	4.72247	3.6893	2.7866	1.72247	UCUGUAUAUA			-0.636	14	37.117	1.64631
YDR430C	CYM1	Lysine-specific metalloprotease of the pitrilysin family; metalloprotease of the intermembrane space; degrades proteins and presequence peptides cleaved from imported proteins; required for normal mitochondrial morphology	II	7.36807	7.10748	6.81762	6.37504	5.54844	4.73877	3.926	2.51096	CCUGUAAAUA	IV	IV	-1.244	14	36.2181	1.60644
YOR354C	MSC6	Protein of unknown function; mutant is defective in directing meiotic recombination events to homologous chromatids; the authentic, non-tagged protein is detected in highly purified mitochondria in high-throughput studies	II	7.04658	6.92837	6.7252	6.3345	5.76288	4.52356	3.01792	0.765535	CUUGUAUAUA			-1.317	14	45.2002	2.00484
YBR121C	GRS1	Cytoplasmic and mitochondrial glycyl-tRNA synthase; ligates glycine to the cognate anticodon-bearing tRNA; transcription termination factor that may interact with the 3'-end of pre-mRNA to promote 3'-end formation; GRS1 has a paralog, GRS2, that arose from the whole genome duplication; human homolog GARS implicated in Charcot-Marie-Tooth disease, can complement yeast null mutant	II	7.87221	7.3443	6.88142	6.3733	5.56682	4.46597	2.56072	-0.321928	CAUGUAAAUU	I	II	NA	8	560.114	24.8437
YPL118W	MRP51	Mitochondrial ribosomal protein of the small subunit; MRP51 exhibits genetic interactions with mutations in the COX2 and COX3 mRNA 5'-untranslated leader sequences	II	7.824	7.41109	6.96924	6.39403	5.6837	4.78136	3.7115	2.32193	UCUGUAAAUA	III	III	-0.593	15	85.9629	3.81285
YNL281W	HCH1	Heat shock protein regulator; binds to Hsp90p and may stimulate ATPase activity; originally identified as a high-copy number suppressor of a HSP90 loss-of-function mutation; role in regulating Hsp90 inhibitor drug sensitivity; GFP-fusion protein localizes to the cytoplasm and nucleus; protein abundance increases in response to DNA replication stress	II	8.79409	8.29738	7.52121	6.53294	5.01792	3.32193	-0.152003	-1.32193	CAUGUAUACA		IV	NA	7	247.249	10.9667
YPR124W	CTR1	High-affinity copper transporter of the plasma membrane; mediates nearly all copper uptake under low copper conditions; transcriptionally induced at low copper levels and degraded at high copper levels; protein increases in abundance and relocalizes from nucleus to plasma membrane upon DNA replication stress	II	6.84172	6.50144	6.04439	5.61176	4.926	3.848	1.926	0.485427	CUUGUAUAUA	IV		-0.218	9	56.1302	2.48964
YGL040C	HEM2	Aminolevulinate dehydratase; a homo-octameric enzyme, catalyzes the conversion of 5-aminolevulinate to porphobilinogen, the second step in heme biosynthesis; enzymatic activity is zinc-dependent; localizes to the cytoplasm and nucleus	II	7.6125	7.41363	7.03672	6.66676	6	5.37504	4.37851	3.01792	CUUGUGAAUA		III	-0.453	9	102.404	4.54208
YGL143C	MRF1	Mitochondrial translation release factor; involved in stop codon recognition and hydrolysis of the peptidyl-tRNA bond during mitochondrial translation; lack of MRF1 causes mitochondrial genome instability	II	7.39661	7.05203	6.57743	5.92125	5.06609	3.90689	2.72247	1.1375	CUUGUAAAUA			-1.048	14	18.9187	0.839133
YJL062W-A	COA3	Mitochondrial protein required for cytochrome c oxidase assembly; also involved in translational regulation of Cox1p and prevention of Cox1p aggregation before assembly; located in the mitochondrial inner membrane	II	6.46107	6.29829	6.06609	5.73606	5.2555	4.49185	3.26303	2.03562	UAUGUAUAUA			-1.497	12	53.338	2.36579
YHR011W	DIA4	Probable mitochondrial seryl-tRNA synthetase; mutant displays increased invasive and pseudohyphal growth	II	6.31832	6.08958	5.81506	5.5267	5.12101	4.1127	3.3505	2.29278	CUUGUAAAUA	III	III	-0.445	14	12.0118	0.532778
YNL252C	MRPL17	Mitochondrial ribosomal protein of the large subunit	II	6.91289	6.72383	6.50144	6.17193	5.75221	5.17792	4.20945	3.26303	CAUGUAAAUA			-0.232	15	42.8921	1.90246
YPL215W	CBP3	Mitochondrial protein required for assembly of cytochrome bc1 complex; forms a complex with Cbp6p that binds to mt ribosomes near the polypeptide tunnel exit and promotes efficient translation of the COB mRNA; Cbp3p-Cbp6p complex also interacts with newly synthesized cytochrome b (Cobp) and Cbp4p to promote assembly of Cobp into the cytochrome bc1 complex; Cbp3p-Cbp6p complex is sequestered if as…	II	7.0268	6.8392	6.52199	6.04876	5.38543	4.24793	2.53605	1.37851	GUUGUAAAUA	IV		-0.625	16	44.7644	1.98551
YGR021W	0	Putative protein of unknown function; the authentic, non-tagged protein is detected in highly purified mitochondria in high-throughput studies	II	6.98527	6.82273	6.65964	6.37851	6.03342	5.39917	4.46597	3.27799	CCUGUAUAUA			-0.514	12	23.4257	1.03904
YKL167C	MRP49	Mitochondrial ribosomal protein of the large subunit; not essential for mitochondrial translation	II	6.65821	6.45121	6.18388	5.74416	4.93546	3.7115	2.43296	-0.321928	CAUGUAUAUA			-0.381	13	45.8621	2.0342
YKL192C	ACP1	Mitochondrial matrix acyl carrier protein; involved in biosynthesis of octanoate, which is a precursor to lipoic acid; activated by phosphopantetheinylation catalyzed by Ppt2p	II	7.24222	7.01792	6.70598	6.40939	5.84046	4.8679	3.33628	1.58496	UAUGUAUAUA			NA	13	238.901	10.5964
YJR113C	RSM7	Mitochondrial ribosomal protein of the small subunit; has similarity to E. coli S7 ribosomal protein	II	7.58571	7.38197	7.08852	6.47735	5.86542	4.74953	3.36457	1.96347	CCUGUACAUA			-0.615	15	56.5345	2.50757
YLR344W	RPL26A	Ribosomal 60S subunit protein L26A; binds to 5.8S rRNA; non-essential even when paralog is also deleted; deletion has minimal affections on ribosome biosynthesis; homologous to mammalian ribosomal protein L26 and bacterial L24; RPL26A has a paralog, RPL26B, that arose from the whole genome duplication	II	8.12722	7.48623	6.75355	5.92363	4.94954	3.9542	2.51096	0.485427	AACGUAUAAA	II	I	NA	4	558.553	24.7744
YDR375C	BCS1	Protein translocase and chaperone required for Complex III assembly; member of the AAA ATPase family; forms a homo-oligomeric complex in the mitochondrial inner membrane that translocates the C-terminal domain of Rip1p from the matrix across the inner membrane, and then delivers it to an assembly intermediate of respiratory Complex III in an ATP-dependent reaction; also required for assembly of t…	II	7.43296	7.30834	7.14262	6.91049	6.43962	5.71425	4.70044	3.41954	CUUGUAUAUA			-0.752	13	26.584	1.17912
YEL050C	RML2	Mitochondrial ribosomal protein of the large subunit (L2); has similarity to E. coli L2 ribosomal protein; mutant allele (fat21) causes inability to utilize oleate, and induce oleic acid oxidation; may interfere with activity of the Adr1p transcription factor	II	7.10224	6.9542	6.82273	6.53916	5.88753	5.10434	3.75489	2.72247	CAUGUAAAUA			-0.987	17	34.6626	1.53745
YNL137C	NAM9	Mitochondrial ribosomal component of the small subunit	II	6.41954	6.2114	6.00225	5.6893	5.19771	4.45286	3.36457	2.40599	ACUGUAAAUA			-0.463	14	49.6321	2.20141
YIL093C	RSM25	Mitochondrial ribosomal protein of the small subunit	II	7.13031	7.03342	6.86171	6.66676	6.32193	5.70044	4.60288	3.23266	CCUGUAUAUA			-0.58	15	32.8579	1.4574
YDR286C	0	Putative protein of unknown function; predicted to have thiol-disulfide oxidoreductase active site	II	7.45368	7.17493	6.82782	6.33985	5.67807	4.7761	3.03562	1.26303	ACUGUAAAUA			-0.805	6	25.7954	1.14415
YKL195W	MIA40	Import and assembly protein in mitochondrial intermembrane space; component of MIA pathway which mediates import and oxidative folding of substrates including small proteins containing twin cysteine motifs; acts in concert with Erv1p, which oxidizes the cysteine residues of Mia40p to comprise a disulfide relay system that catalyzes import; also mediates folding of Atp23p via a chaperone-like acti…	II	7.75221	7.56682	7.33002	6.98185	6.43463	5.5267	4.41954	2.848	CAUGUAAAUA			-0.363	12	76.7254	3.40313
YBR120C	CBP6	Mitochondrial protein required for translation of the COB mRNA; forms a complex with Cbp3p that binds to mt ribosomes near the polypeptide tunnel exit and promotes efficient translation of the COB mRNA; Cbp3p-Cbp6p complex also interacts with newly synthesized cytochrome b (Cobp) and Cbp4p to promote assembly of Cobp into the cytochrome bc1 complex; Cbp3p-Cbp6p complex is sequestered if assembly …	II	6.05311	5.9542	5.70044	5.44956	4.94486	4.01792	3.1375	2	CUUGUAAAUA			-0.408	14	31.4957	1.39698
YBR024W	SCO2	Protein anchored to mitochondrial inner membrane; may have a redundant function with Sco1p in delivery of copper to cytochrome c oxidase; interacts with Cox2p; SCO2 has a paralog, SCO1, that arose from the whole genome duplication	II	6.01123	5.79442	5.55459	5.27426	4.926	4.26303	3.15381	2.45943	AUUGUAAAUA			-0.956	15	12.7029	0.563435
YDR237W	MRPL7	Mitochondrial ribosomal protein of the large subunit; MRPL7 produces both YmL5 and YmL7, which are two different modified forms of the same protein	II	6.86542	6.74012	6.51885	6.19574	5.60288	4.59694	3.01792	0.485427	CAUGUAAAUA			-1.083	15	47.8628	2.12294
YMR023C	MSS1	Mitochondrial protein; forms a heterodimer complex with Mto1p that performs the 5-carboxymethylaminomethyl modification of the wobble uridine base in mitochondrial tRNAs; similar to human GTPBP3	II	6.23074	6.08746	5.74147	5.30378	4.57894	3.65535	2.8679	1.32193	CGUGUAUAUA			-0.517	10	7.51523	0.333336
YNL306W	MRPS18	Mitochondrial ribosomal protein of the small subunit; essential for viability, unlike most other mitoribosomal proteins	II	7.2317	7.02126	6.65821	6.1639	5.44956	4.40599	3.05311	1.67807	CGUGUAAAUA			-0.383	15	68.687	3.04659
YMR089C	YTA12	Mitochondrial inner membrane m-AAA protease component; mediates degradation of misfolded or unassembled proteins; also required for correct assembly of mitochondrial enzyme complexes	II	7.84298	7.57743	7.19377	6.71012	6	4.77083	3.37851	1.53605	CAUGUAAAUA			-0.572	14	65.1834	2.89119
YLL013C	PUF3	Protein of the mitochondrial outer surface; links the Arp2/3 complex with the mitochore during anterograde mitochondrial movement; also binds to and promotes degradation of mRNAs for select nuclear-encoded mitochondrial proteins	II	6.58646	6.44956	6.28725	6.07254	5.80219	5.17393	4.35755	3.24793	ACUGUACAUA			-1.614	11	43.2452	1.91813
YHL014C	YLF2	Protein of unknown function; has weak similarity to E. coli GTP-binding protein gtp1; the authentic, non-tagged protein is detected in highly purified mitochondria in high-throughput studies	II	6.31107	6.23649	6.01792	5.7115	5.30378	4.70598	3.60881	2.29278	CUUGUAAAUA			-0.539	14	11.3738	0.504481
YHR147C	MRPL6	Mitochondrial ribosomal protein of the large subunit	II	7.01569	6.74685	6.4822	6.07468	5.26303	4.21723	2.29278	0.263034	CUUGUAAAUA			-0.681	14	53.4227	2.36955
YLR204W	QRI5	Mitochondrial inner membrane protein; required for accumulation of spliced COX1 mRNA; may have an additional role in translation of COX1 mRNA	II	7.224	7.12412	6.98071	6.74416	6.25739	5.56682	4.78136	3.90689	CAUGUAUAUA			NA	5	60.0045	2.66148
YIL022W	TIM44	Essential component of the TIM23 complex; tethers the import motor and regulatory factors (PAM complex) to the translocation channel (Tim23p-Tim17p core complex); TIM23 complex is short for the translocase of the inner mitochondrial membrane	II	7.06717	6.76951	6.3837	5.84298	4.95884	3.94486	1.80736	0.765535	CUUGUAAAUA			-0.533	14	89.5243	3.97082
YDL192W	ARF1	ADP-ribosylation factor; GTPase of the Ras superfamily involved in regulation of coated vesicle formation in intracellular trafficking within the Golgi; ARF1 has a paralog, ARF2, that arose from the whole genome duplication	II	9.17667	8.72144	8.25408	7.54303	6.42626	4.82782	3.39232	1.32193	CUUGUAUAAA			NA	5	1055.87	46.8327
YMR158W	MRPS8	Mitochondrial ribosomal protein of the small subunit	II	7.02126	6.89118	6.7866	6.59842	6.18388	5.52042	4.59694	3.05311	CAUGUAAAUA			-0.649	13	57.4066	2.54625
YMR193W	MRPL24	Mitochondrial ribosomal protein of the large subunit; two mitochondrial ribosomal proteins, YmL14 and YmL24, have been assigned to the same gene	II	6.97039	6.69349	6.44128	6.14771	5.65249	4.53605	3.16993	1.63227	CCUGUAUAUA			-0.483	14	31.2605	1.38655
YBL059C-A	CMC2	Protein involved in respiratory chain complex assembly or maintenance; protein of the mitochondrial intermembrane space; contains twin Cx9C motifs that can form coiled coil-helix-coiled-coil helix fold	II	6.93664	6.76951	6.52826	6.22689	5.74953	4.94486	3.88753	2.65535	CUUGUAAAUA			-1.16	13	40.5485	1.79851
YOR158W	PET123	Mitochondrial ribosomal protein of the small subunit; PET123 exhibits genetic interactions with PET122, which encodes a COX3 mRNA-specific translational activator	II	6.39232	6.25927	6.09381	5.84298	5.36107	4.71699	3.58496	2	CAUGUAUAUA			-0.39	13	37.2603	1.65267
YPR100W	MRPL51	Mitochondrial ribosomal protein of the large subunit	II	6.74147	6.62936	6.40429	6.07468	5.55152	4.61471	3.27799	1.67807	CUUGUAUAUA			-0.632	15	39.2694	1.74178
YGR084C	MRP13	Mitochondrial ribosomal protein of the small subunit	II	7.09381	6.97384	6.77215	6.58796	6.22689	5.67242	4.90207	3.64386	CCUGUAAAUA		IV	-0.438	6	41.1601	1.82564
YCR071C	IMG2	Mitochondrial ribosomal protein of the large subunit; conserved in metazoa, with similarity to human mitochondrial ribosomal protein MRPL49	II	7.24413	7.11894	7.01234	6.8189	6.49985	5.89482	4.82273	3.63227	CAUGUAUAUA			-0.286	14	36.2709	1.60878
YGL129C	RSM23	Mitochondrial ribosomal protein of the small subunit; has similarity to mammalian apoptosis mediator proteins; null mutation prevents induction of apoptosis by overproduction of metacaspase Mca1p	II	6.67384	6.55612	6.43796	6.15987	5.81506	5.15381	4.37851	3.45943	CAUGUACAUA			-0.545	16	42.215	1.87243
YNL005C	MRP7	Mitochondrial ribosomal protein of the large subunit	II	6.87529	6.75355	6.39917	5.97728	4.90207	3.8679	2.65535	1.20163	CCUGUAAAUA			-0.802	15	55.1251	2.44506
YPL240C	HSP82	Hsp90 chaperone; redundant in function with Hsc82p; required for pheromone signaling, negative regulation of Hsf1p; docks with Tom70p for mitochondrial preprotein delivery; promotes telomerase DNA binding, nucleotide addition; protein abundance increases in response to DNA replication stress; contains two acid-rich unstructured regions that promote solubility of chaperone-substrate complexes; HSP…	II	7.72792	7.22689	6.6893	6.14975	5.27799	4.26303	3.07039	1.80736	UAUGUAAAUA	III		NA	9	175.773	7.79636
YHR059W	FYV4	Protein of unknown function; required for survival upon exposure to K1 killer toxin	II	6.52356	6.32373	6.12722	5.86295	5.30012	4.60881	3.16993	1.63227	CUUGUAAAUA			0.215	15	49.4938	2.19528
YJL208C	NUC1	Major mitochondrial nuclease; has RNAse and DNA endo- and exonucleolytic activities; roles in mitochondrial recombination, apoptosis and maintenance of polyploidy; involved in fragmentation of genomic DNA during PND (programmed nuclear destruction); encodes ortholog of mammalian endoG	II	5.07039	4.7866	4.49185	3.96347	3.32193	2.45943	1.63227	-1.73697	ACUGUAAAUA		IV	-0.228	10	59.7199	2.64886
YNR020C	ATP23	Putative metalloprotease of the mitochondrial inner membrane; required for processing of Atp6p; has an additional role in assembly of the F0 sector of the F1F0 ATP synthase complex; substrate of the Mia40p-Erv1p disulfide relay system, and folding is assisted by Mia40p	II	4.10434	4.07895	4.00899	3.89724	3.36457	2.3505	1.67807	0.485427	CUUGUAAAUA			-0.701	12	12.3799	0.549106
YDR079W	PET100	Chaperone that facilitates the assembly of cytochrome c oxidase; integral to the mitochondrial inner membrane; interacts with a subcomplex of subunits VII, VIIa, and VIII (Cox7p, Cox9p, and Cox8p) but not with the holoenzyme	II	5.83794	5.64386	5.42962	5.12516	4.6837	3.81762	2.63227	0.678072	CAUGUACAUA			-1.012	13	33.3946	1.48121
YDR036C	EHD3	3-hydroxyisobutyryl-CoA hydrolase; member of a family of enoyl-CoA hydratase/isomerases; non-tagged protein is detected in highly purified mitochondria in high-throughput studies; phosphorylated; mutation affects fluid-phase endocytosis	II	6.23458	5.94017	5.60585	5.0268	4.3147	3.44626	1.20163	-1.32193	CAUGUAAAUA			-0.752	13	43.8673	1.94572
YER093C-A	AIM11	Protein of unknown function; null mutant is viable but shows increased loss of mitochondrial genome and synthetic interaction with prohibitin (phb1); contains an intron; YER093C-A has a paralog, YBL059W, that arose from the whole genome duplication	II	6.05094	5.66391	5.36107	5.07895	4.45286	3.30743	0.925999	-0.736966	ACUGUAAAUA		III	-0.87	11	12.2123	0.541671
YGR257C	MTM1	Mitochondrial protein of the mitochondrial carrier family; high affinity pyridoxal 5'-phosphate (PLP) transporter, important for delivery of PLP cofactor to mitochondrial enzymes; involved in mitochondrial iron homeostasis and in activating mitochondrial Sod2p by facilitating insertion of an essential manganese cofactor	II	6.88387	6.50144	6.00225	5.18982	4.40599	3.23266	2.40599	0.263034	CUUGUAAAUA			-0.438	14	39.4682	1.7506
YLR008C	PAM18	Subunit of the import motor (PAM complex); the PAM complex is a component of the Translocase of the Inner Mitochondrial membrane (TIM23 complex); essential J-protein cochaperone that stimulates Ssc1p ATPase activity to drive import; inhibited by Pam16p	II	6.32193	5.88996	5.38888	4.63807	3.848	2.63227	0.765535	-2.32193	CUUGUAAAUA		IV	-0.214	14	133.815	5.93532
YJL046W	AIM22	Putative lipoate-protein ligase; required along with Lip2 and Lip5 for lipoylation of Lat1p and Kgd2p; similar to E. coli LplA; null mutant displays reduced frequency of mitochondrial genome loss	II	6.09803	5.84549	5.36107	4.853	4	3	1.53605	0.485427	CUUGUAAAUA			-0.601	8	20.7172	0.918902
YKL170W	MRPL38	Mitochondrial ribosomal protein of the large subunit; appears as two protein spots (YmL34 and YmL38) on two-dimensional SDS gels; protein abundance increases in response to DNA replication stress	II	5.88264	5.75756	5.44294	5.10434	4.43296	3.63227	2.70044	1.76554	CCUGUAUAUA			-0.513	15	52.9304	2.34771
YER087W	AIM10	Protein with similarity to tRNA synthetases; non-tagged protein is detected in purified mitochondria; null mutant is viable and displays elevated frequency of mitochondrial genome loss	II	4.91169	4.76553	4.57289	4.19377	3.8679	3.07039	1.96347	0.584963	CAUGUAUAUA	III		-0.283	9	12.197	0.540996
YJR122W	IBA57	Protein involved in incorporating iron-sulfur clusters into proteins; mitochondrial matrix protein; involved in the incorporation of iron-sulfur clusters into mitochondrial aconitase-type proteins; activates the radical-SAM family members Bio2p and Lip5p; interacts with Ccr4p in the two-hybrid system	II	5.36107	5.18587	4.82782	4.3147	3.6893	2.53605	0.925999	0.263034	CUUGUAAAUA			-0.666	9	12.1519	0.538993
YDR462W	MRPL28	Mitochondrial ribosomal protein of the large subunit; protein abundance increases in response to DNA replication stress	II	4.99549	4.77083	4.56072	3.96347	3.26303	2.20163	1	-1	UAUGUACAUA			-0.563	14	36.6683	1.62641
YBR292C	0	Dubious open reading frame; unlikely to encode a functional protein, based on available experimental and comparative sequence data; YBR292C is not an essential gene	II	5.07895	4.96809	4.62059	4.16993	3.79701	2.82782	1.58496	0.378512	AUUAUAAAUU		IV	NA	#N/A	4.04129	0.17925
YNL185C	MRPL19	Mitochondrial ribosomal protein of the large subunit	II	5.9542	5.76818	5.51728	5.1334	4.44626	3.58496	2.1375	0.765535	UCUGUAAAUA	IV		-1.332	15	42.7494	1.89614
YDR116C	MRPL1	Mitochondrial ribosomal protein of the large subunit	II	3.62059	3.44626	3.3505	3.15381	2.88753	2.56072	1.926	1.37851	CAUGUACAUA			-0.736	15	37.7532	1.67453
YLR163C	MAS1	Beta subunit of the mitochondrial processing protease (MPP); essential processing enzyme that cleaves the N-terminal targeting sequences from mitochondrially imported proteins	II	6.81506	6.53916	6.1918	5.67525	4.98641	3.7761	0.678072	0.137504	AUUGUAUAUA			-0.078	11	55.4423	2.45913
YPL183W-A	RTC6	Protein involved in translation; mutants have defects in biogenesis of nuclear ribosomes; sequence similar to prokaryotic ribosomal protein L36, may be a mitochondrial ribosomal protein; protein abundance increases in response to DNA replication stress	II	5.04876	4.83794	4.54844	4.16189	3.37851	2.23266	1.07039	-0.152003	UCUGUAAAUA			-1.23	12	50.8962	2.25748
YMR098C	ATP25	Mitochondrial protein required for the stability of Oli1p (Atp9p) mRNA; also required for the Oli1p ring formation; YMR098C is not an essential gene	II	5.6865	5.52042	5.20555	4.79181	3.66676	2.37851	0.678072	-0.321928	CCUGUAUAUA			-0.432	14	22.7545	1.00927
YML081C-A	ATP18	Subunit of the mitochondrial F1F0 ATP synthase; F1F0 ATP synthase is a large, evolutionarily conserved enzyme complex required for ATP synthesis; termed subunit I or subunit j; does not correspond to known ATP synthase subunits in other organisms	II	6.29646	5.6865	5.17792	4.63807	3.73335	2.23266	1.43296	-0.152003	UUUGUAUAUA			0.072	6	255.017	11.3112
YCR031C	RPS14A	Protein component of the small (40S) ribosomal subunit; required for ribosome assembly and 20S pre-rRNA processing; mutations confer cryptopleurine resistance; homologous to mammalian ribosomal protein S14 and bacterial S11; RPS14A has a paralog, RPS14B, that arose from the whole genome duplication	II	6.96924	6.21529	5.51728	4.74953	4.15381	2.98185	2	-0.321928	UGUGUACAUA	II	I	NA	7	1879.06	83.3452
YML078W	CPR3	Mitochondrial peptidyl-prolyl cis-trans isomerase (cyclophilin); catalyzes the cis-trans isomerization of peptide bonds N-terminal to proline residues; involved in protein refolding after import into mitochondria	II	7.81954	7.18982	6.61618	5.8679	4.95884	2.98185	0.925999	-2.32193	CUCAUAAAAA			NA	11	237.901	10.552
YBL090W	MRP21	Mitochondrial ribosomal protein of the small subunit; MRP21 exhibits genetic interactions with mutations in the COX2 and COX3 mRNA 5'-untranslated leader sequences	II	5.33271	5.00899	4.70598	4.43296	3.41954	2.53605	0.765535	-0.736966	UUUGUAAAUA			-1.031	14	54.4559	2.41537
YNL112W	DBP2	ATP-dependent RNA helicase of the DEAD-box protein family; has a strong preference for dsRNA; interacts with YRA1; required for the assembly of Yra1p, Nab2p and Mex67p onto mRNA and formation of nuclear mRNP; involved in mRNA decay and rRNA processing; may be involved in suppression of transcription from cryptic initiation sites	II	4.18587	4.12101	4.06178	3.97269	3.76553	3.29278	2.23266	1.1375	CUUGUAAAUA	II		-0.156	4	242.634	10.762
YJL180C	ATP12	Assembly factor for the F1 sector of mitochondrial F1F0 ATP synthase; conserved protein; required for the assembly of alpha and beta subunits into the F1 sector of the mitochondrial F1F0 ATP synthase; mutation of human ATP12 reduces active ATP synthase levels and is associated with the disorder ATPAF2 deficiency	II	6.1416	5.7252	5.34696	4.70598	4.12928	3.21723	2.48543	1.1375	UCUGUAAAUA			-0.686	13	28.7156	1.27367
YGR054W	0	Eukaryotic initiation factor (eIF) 2A; associates specifically with both 40S subunits and 80 S ribosomes, and interacts genetically with both eIF5b and eIF4E; homologous to mammalian eIF2A	II	5.5267	5.30743	4.99095	4.51728	3.91648	2.74416	0.925999	-0.736966	UGUGUAAAUA			-0.515	5	199.049	8.82874
YDR494W	RSM28	Mitochondrial ribosomal protein of the small subunit; genetic interactions suggest a possible role in promoting translation initiation	II	6.02459	5.88996	5.65821	5.21335	4.44626	3.39232	1.48543	-0.152003	CCUGUAAAUA			-0.442	7	36.5594	1.62158
YIL134W	FLX1	Mitochondrial flavin adenine dinucleotide transporter; FAD is a synthesis product of riboflavin; human homolog SLC25A32 is implicated in multiple acyl-CoA dehydrogenase deficiency (MADD) or glutaric aciduria type II (GAII), and can complement yeast null mutant	II	5.20945	5.05311	4.62059	4.22497	3.89724	3.26303	2.26303	1.848	CUUGUAAAUA			-0.614	7	19.6399	0.871123
YGR132C	PHB1	Subunit of the prohibitin complex (Phb1p-Phb2p); prohibitin is a 1.2 MDa ring-shaped inner mitochondrial membrane chaperone that stabilizes newly synthesized proteins; determinant of replicative life span; involved in mitochondrial segregation; prohibitin deficiency induces a mitochondrial unfolded protein response (mtUPR)	II	4.91648	4.79181	4.43962	4.10434	3.40599	2.43296	1.26303	-0.736966	CCUGUAUAUA			-0.461	13	130.266	5.77791
YBR192W	RIM2	Mitochondrial pyrimidine nucleotide transporter; imports pyrimidine nucleoside triphosphates and exports pyrimidine nucleoside monophosphates; member of the mitochondrial carrier family	II	5.49825	5.23649	4.90207	4.53605	3.97269	2.40599	0.485427	-0.321928	CUUGUAAAUA			-0.261	11	24.1924	1.07305
YMR317W	0	Putative protein of unknown function; has some similarity to sialidase from Trypanosoma; YMR317W is not an essential gene	II	5.56377	5.21723	4.94954	4.63807	3.98185	2.96347	1.67807	-1	GUUGUAAAUA		IV	NA	4	8.96784	0.397766
YMR040W	YET2	Protein of unknown function that may interact with ribosomes; based on co-purification experiments; homolog of human BAP31 protein; YET2 has a paralog, YET1, that arose from the whole genome duplication	II	4.51728	4.43296	4.38543	4.27053	3.65535	3.01792	2	0.765535	UAUGUAAAUA			NA	5	6.59925	0.292707
YGR062C	COX18	Protein required for membrane insertion of C-terminus of Cox2p; mitochondrial integral inner membrane protein; interacts genetically and physically with Mss2p and Pnt1p; similar to S. cerevisiae Oxa1, N. crassa Oxa2p, and E. coli YidC	II	5.75489	5.32912	4.96809	4.53605	3.66676	2.90689	1.48543	0	CUUGUAAAUA		IV	-0.076	10	19.6635	0.872167
YAL039C	CYC3	Cytochrome c heme lyase (holocytochrome c synthase); attaches heme to apo-cytochrome c (Cyc1p or Cyc7p) in mitochondrial intermembrane space; human homolog HCCS implicated in microphthalmia with linear skin defects (MLS), and can complement yeast null mutant	II	5.83794	5.58796	5.33628	5.02237	4.3147	3.44626	2.40599	1.1375	CGUGUAAAUA			-0.697	16	35.6555	1.58149
YNL177C	MRPL22	Mitochondrial ribosomal protein of the large subunit	II	6.15178	5.80993	5.56072	5.1127	4.08746	2.90689	0.678072	-1	UCUGUAAAUA			-0.291	14	39.1619	1.73701
YPL104W	MSD1	Mitochondrial aspartyl-tRNA synthetase; required for acylation of aspartyl-tRNA; yeast and bacterial aspartyl-, asparaginyl-, and lysyl-tRNA synthetases contain regions with high sequence similarity, suggesting a common ancestral gene	II	5.40259	5.06609	4.63807	4.16189	3.07039	1.76554	0.678072	0	CUUGUAAAUA			-0.665	15	15.8938	0.704964
YGL064C	MRH4	Mitochondrial ATP-dependent RNA helicase of the DEAD-box family; required for assembly of the large subunit of mitochondrial ribosomes; binds to the large subunit rRNA, 21S_rRNA; localizes to the matrix face of the mitochondrial inner membrane and associates with the large subunit precursor and with mature ribosomes	II	4.32193	4.17792	4.08746	3.82782	3.47249	2.82782	1.58496	-0.321928	CUUGUAAAUA			-0.441	11	20.0414	0.888929
YER050C	RSM18	Mitochondrial ribosomal protein of the small subunit; has similarity to E. coli S18 ribosomal protein	II	6.8505	6.64241	6.31651	5.93074	5.02237	3.64386	-0.152003	-1.73697	UCUGUAAAUA		III	-0.518	12	86.0944	3.81869
YIL157C	COA1	Mitochondrial inner membrane protein; required for assembly of the cytochrome c oxidase complex (complex IV); interacts with complex IV assembly factor Shy1p during the early stages of assembly	II	5.77873	5.64386	5.47573	5.1416	4.61471	3.88753	2.48543	0.137504	UCUGUAAAUA		IV	-0.668	15	46.833	2.07726
YPL040C	ISM1	Mitochondrial isoleucyl-tRNA synthetase; null mutant is deficient in respiratory growth; human homolog IARS2 implicated in mitochondrial diseases, can partially complement yeast null mutant	II	5.80478	5.52042	5.39232	5.08321	4.16993	3.41954	1.72247	0.584963	CCUGUAUAUA			-0.62	13	14.9986	0.665259
YBL038W	MRPL16	Mitochondrial ribosomal protein of the large subunit; homologous to bacterial L16 ribosomal protein; synthetic lethality with hac1 mutation suggests a possible role in synthesis of precursors for protein glycosylation	II	5.46597	5.22497	4.93546	4.48543	4	2.8679	0.584963	-1.32193	CAUGUAUAUA			-0.512	16	48.9503	2.17117
YNL284C	MRPL10	Mitochondrial ribosomal protein of the large subunit; appears as two protein spots (YmL10 and YmL18) on two-dimensional SDS gels	II	5.56377	5.10434	4.90689	4.41278	3.8679	3.1375	2.1375	0.584963	CUUGUACAUA			-0.662	13	46.9501	2.08245
YNL085W	MKT1	Protein similar to nucleases that forms a complex with Pbp1p; complex may mediate posttranscriptional regulation of HO; involved in propagation of M2 dsRNA satellite of L-A virus; allelic variation affects mitochondrial genome stability, drug resistance, and more; forms cytoplasmic foci upon DNA replication stress; localization to P-bodies under ethanol stress differs between strains	II	4.54844	4.32912	4.1127	3.66676	3.10434	2.45943	1.76554	0.765535	CAUGUACAUA			-0.055	8	224.963	9.97814
YLR382C	NAM2	Mitochondrial leucyl-tRNA synthetase; also has direct role in splicing of several mitochondrial group I introns; indirectly required for mitochondrial genome maintenance; human homolog LARS2 can complement yeast null mutant, and is implicated in Perrault syndrome	II	4.46597	4.34341	4.20163	3.89724	3.23266	2.76553	1.07039	0.378512	CUUGUAAAUA			-0.828	14	17.4222	0.772757
YLR244C	MAP1	Methionine aminopeptidase; catalyzes the cotranslational removal of N-terminal methionine from nascent polypeptides; function is partially redundant with that of Map2p	II	8.40727	7.90026	7.19771	6.02901	4.57894	2.32193	-0.152003	-2.32193	CUUAUACAUA	III	III	NA	9	356.026	15.7914
YJR104C	SOD1	Cytosolic copper-zinc superoxide dismutase; detoxifies superoxide; stabilizes Yck1p and Yck2p kinases in glucose to repress respiration; phosphorylated by Dun1p, enters nucleus under oxidative stress to promote transcription of stress response genes; human ortholog SOD1 implicated in ALS and complements yeast null; abundance increases under DNA replication stress and during exposure to boric acid…	II	6.33271	5.60585	4.94017	4.17792	3.47249	2.848	1.26303	-0.152003	CAUGUAUAUG	II	II	NA	6	1154.46	51.2058
YPL132W	COX11	Protein required for delivery of copper to Cox1p; mitochondrial inner membrane protein; association with mitochondrial ribosomes suggests that copper delivery may occur during translation of Cox1p	II	5.94017	5.69209	5.49185	5.1819	4.54844	3.12101	0.847997	-0.152003	AAUGUACAUA			-0.36	16	23.6197	1.04764
YMR267W	PPA2	Mitochondrial inorganic pyrophosphatase; required for mitochondrial function and possibly involved in energy generation from inorganic pyrophosphate	II	5.15381	4.86295	4.32912	3.848	3.12101	1.88752	0.678072	0	CUUGUAUAUA			-0.545	6	59.4622	2.63743
YLR406C	RPL31B	Ribosomal 60S subunit protein L31B; associates with karyopherin Sxm1p; loss of both Rpl31p and Rpl39p confers lethality; homologous to mammalian ribosomal protein L31, no bacterial homolog; RPL31B has a paralog, RPL31A, that arose from the whole genome duplication	II	6.50462	5.98869	5.1334	4.30012	2.98185	1.37851	0.765535	-1.73697	AUUGUAAAAA	III	I	NA	4	505.462	22.4196
YIR021W	MRS1	Splicing protein; required for splicing of two mitochondrial group I introns (BI3 in COB and AI5beta in COX1); forms a splicing complex, containing four subunits of Mrs1p and two subunits of the BI3-encoded maturase, that binds to the BI3 RNA; MRS1 has a paralog, CCE1, that arose from the whole genome duplication	II	5.59395	5.2555	4.89724	4.51096	4.04439	3.43296	2	-0.321928	CAUGUAAAUA			-0.047	1	28.5311	1.26549
YHR091C	MSR1	Mitochondrial arginyl-tRNA synthetase; mutations in human ortholog are associated with pontocerebellar hypoplasia type 6; MSR1 has a paralog, YDR341C, that arose from the whole genome duplication	II	5.55765	5.19377	4.89239	4.60881	4.20945	3.08746	1.96347	0.378512	CAUGUAAAUA			-0.122	8	18.0055	0.79863
YJL066C	MPM1	Mitochondrial intermembrane space protein of unknown function	II	4.98641	4.7761	4.35755	4.04439	3.63227	2.56072	1.96347	1.26303	CUUGUAUAUA			-1.114	12	19.6753	0.872693
YNL213C	RRG9	Protein of unknown function; null mutant lacks mitochondrial DNA and cannot grow on glycerol; the authentic, non-tagged protein is detected in highly purified mitochondria in high-throughput studies	II	5.24793	4.76022	4.56682	4.03562	3.47249	2.67807	1.32193	-0.321928	CUUGUAGAUA	II		-0.468	13	34.577	1.53365
YDR194C	MSS116	Mitochondrial transcription elongation factor; DEAD-box protein; required for efficient splicing of mitochondrial Group I and II introns; non-polar RNA helicase that also facilities strand annealing; promotes RNA folding by stabilizing an early assembly intermediate	II	5.2854	4.88264	4.63807	4.14568	3.10434	2.16993	1.53605	0.137504	CGUGUAAAUA			-0.768	15	150.189	6.66157
YBL107C	MIX23	Mitochondrial intermembrane space protein of unknown function; imported via the MIA import machinery; contains an unusual twin cysteine motif (CX13C CX14C)	II	5.46271	5.10852	4.80736	4.47249	4.01792	3.07039	1.58496	-0.152003	CUUGUACAUA			-0.867	11	25.987	1.15265
YIL070C	MAM33	Acidic protein of the mitochondrial matrix; involved in oxidative phosphorylation; related to the human complement receptor gC1q-R	II	4.51096	4.40599	4.30743	4.1127	3.59694	2.90689	2.20163	1.26303	ACUGUAAAUA			-1.396	14	57.2343	2.53861
YOL071W	SDH5	Protein required for flavinylation of Sdh1p; binds to Sdh1p and promotes FAD cofactor attachment, which is necessary for succinate dehydrogenase (SDH) complex assembly and activity; mutations in human ortholog PGL2 are associated with neuroendocrine tumors (paraganglioma)	II	4.91169	4.74416	4.57289	4.24031	3.90689	2.848	1.76554	-0.321928	CUUGUAAAUA			-1.525	12	16.4094	0.727834
YMR286W	MRPL33	Mitochondrial ribosomal protein of the large subunit	II	6.32553	5.853	5.33628	4.56072	3.15381	0.925999	0.137504	-0.152003	UAUGUAUAUA			0.039	16	69.4676	3.08121
YPR166C	MRP2	Mitochondrial ribosomal protein of the small subunit	II	5.1819	4.99095	4.83794	4.52982	4.09592	3.47249	2.48543	1	CUUGUAAAUA			-1.394	14	72.765	3.22747
YBL030C	PET9	Major ADP/ATP carrier of the mitochondrial inner membrane; exchanges cytosolic ADP for mitochondrially synthesized ATP; also imports heme and ATP; required for viability in many lab strains that carry a sal1 mutation; PET9 has a paralog, AAC3, that arose from the whole genome duplication; human homolog SLC25A4 implicated in progressive external ophthalmoplegia can complement yeast null mutant	II	6.56529	6.12101	5.57592	4.7115	3.6893	2.60881	0.925999	-0.514573	UACGUAUAAA			-0.063	8	250.874	11.1275
YOR232W	MGE1	Mitochondrial matrix cochaperone; nucleotide release factor for Ssc1p in protein translocation and folding; also acts as cochaperone for Ssq1p in folding of Fe-S cluster proteins; acts as oxidative sensor to regulate mitochondrial Ssc1p; in presence of oxidative stress, dimeric Mge1p becomes a monomer and unable to regulate Ssc1p function; homolog of E. coli GrpE and human Mge1 (GRPEL1), which al…	II	7.00899	6.62936	6.06178	5.37504	4.27053	2.82782	1.67807	0	CUUGUAUAUA	III		-0.662	14	315.913	14.0122
YNL121C	TOM70	Component of the TOM (translocase of outer membrane) complex; involved in the recognition and initial import steps for all mitochondrially directed proteins; acts as a receptor for incoming precursor proteins; TOM70 has a paralog, TOM71, that arose from the whole genome duplication	II	4.80736	4.63807	4.43962	4.12101	3.58496	3.07039	2.20163	1.43296	UCUGUAAAUA			-0.876	16	187.661	8.32365
YNL081C	SWS2	Putative mitochondrial ribosomal protein of the small subunit; has similarity to E. coli S13 ribosomal protein; participates in controlling sporulation efficiency; localizes to vacuole in response to H2O2	II	5.16993	4.98185	4.73877	4.49185	3.82782	3.24793	2.32193	0.925999	CCUGUAUAUA			-0.409	14	62.5708	2.77531
YIR024C	INA22	F1F0 ATP synthase peripheral stalk assembly factor; subunit of the matrix-exposed inner mitochondrial membrane localized INA complex (Ina22p-Ina17p) involved in assembly of the F1F0 peripheral stalk; co-purifies with Aim43p, ATP synthase subunits, and cytochrome bc1 complex assembly factors; interacts with Arh1p, a mitochondrial oxidoreductase; deletion mutant has a respiratory growth defect	II	5.0268	4.60288	4.30012	3.89724	3.41954	2.67807	1.848	0.263034	CAUGUAAAUA			-0.169	4	11.8476	0.525499
YHL004W	MRP4	Mitochondrial ribosomal protein of the small subunit	II	4.65535	4.49185	4.2555	4.00899	3.56072	2.76553	1.96347	1.1375	CUUGUACAUA			-0.883	15	53.1257	2.35637
YGR147C	NAT2	Protein of unknown function; has an apparent role in acetylation of N-terminal methionine residues	II	6.2075	5.96809	5.55765	4.99549	3.91648	2.53605	0.263034	-1.32193	CAUGUAUAUA			-0.35	15	70.0698	3.10792
YOL126C	MDH2	Cytoplasmic malate dehydrogenase; one of three isozymes that catalyze interconversion of malate and oxaloacetate; involved in the glyoxylate cycle and gluconeogenesis during growth on two-carbon compounds; interacts with Pck1p and Fbp1	II	5.42626	5.07468	4.53605	4.1375	3.29278	2.45943	1.67807	0.378512	CAUAUAUAUA	II		-0.391	3	75.8593	3.36471
YPR067W	ISA2	Protein required for maturation of mitochondrial [4Fe-4S] proteins; functions in a complex with Isa1p and possibly Iba57p; localizes to the mitochondrial intermembrane space, overexpression of ISA2 suppresses grx5 mutations	II	6.19377	5.82018	5.38888	4.59096	3.53605	2.16993	-0.152003	-1.73697	CCUGUAUAUA		III	-0.094	14	44.3688	1.96796
YPL094C	SEC62	Essential subunit of Sec63 complex; with Sec61 complex, Kar2p/BiP and Lhs1p forms a channel competent for SRP-dependent and post-translational SRP-independent protein targeting and import into the ER; cotranslationally N-acetylated by NatA; other members are Sec63p, Sec66p, and Sec72p	II	6.12722	5.2211	4.38543	3.29278	2.29278	1.926	0.678072	0.678072	CAUGUACAAA	IV	II	0.01	5	164.355	7.2899
YKR065C	PAM17	Constituent of the TIM23 complex; proposed alternatively to be a component of the import motor (PAM complex) or to interact with and modulate the core TIM23 (Translocase of the Inner mitochondrial Membrane) complex; protein abundance increases in response to DNA replication stress	II	6.67948	6.21917	5.75756	5.08321	4.03562	2.56072	0	-1	UCUGUAUAUA		IV	-0.155	13	88.7315	3.93566
YGL236C	MTO1	Mitochondrial protein; forms heterodimer complex with Mss1p that performs 5-carboxymethylaminomethyl modification of the wobble uridine base in mitochondrial tRNAs; required for respiration in paromomycin-resistant 15S rRNA mutants; human homolog MTO1 can complement yeast null mutant	II	6.32733	6.11478	5.853	5.41278	4.60881	3.33628	1.20163	-0.152003	UAUGUAAAUA			-0.443	15	21.905	0.971587
YPL087W	YDC1	Alkaline dihydroceramidase, involved in sphingolipid metabolism; preferentially hydrolyzes dihydroceramide to a free fatty acid and dihydrosphingosine; has a minor reverse activity; YDC1 has a paralog, YPC1, that arose from the whole genome duplication	III	4.30012	3.926	3.41954	3.03562	2.07039	0.137504	0	0	UUUGUAUAUA			-0.303	10	34.2747	1.52024
YLR067C	PET309	Specific translational activator for the COX1 mRNA; binds to the COX1 mRNA; also influences stability of intron-containing COX1 primary transcripts; localizes to the mitochondrial inner membrane; contains 12 pentatricopeptide repeats (PPRs)	III	4.29278	3.7866	3.41954	3.07039	2.40599	1.88752	1.58496	0.584963	CAUGUAAAUA			-0.466	11	16.6198	0.737165
YGR174C	CBP4	Mitochondrial protein required for assembly of cytochrome bc1 complex; interacts with the Cbp3p-Cbp6p complex and newly synthesized cytochrome b (Cobp) to promote assembly of Cobp into the cytochrome bc1 complex	III	4.99095	4.77083	4.40599	3.72247	2.45943	0.925999	-0.736966	-1.73697	ACUGUAAAUA			-0.673	14	24.4235	1.0833
YOL059W	GPD2	NAD-dependent glycerol 3-phosphate dehydrogenase; expression is controlled by an oxygen-independent signaling pathway required to regulate metabolism under anoxic conditions; located in cytosol and mitochondria; constitutively active but is inactivated via phosphorylation by energy-stress responsive kinase SNF1; GPD2 has a paralog, GPD1, that arose from the whole genome duplication	III	6.1918	5.74416	5.18587	4.16189	2.80735	0.137504	-1	0	UCUAUAUAUA	I	II	NA	4	123.067	5.45859
YJR133W	XPT1	Xanthine-guanine phosphoribosyl transferase; required for xanthine utilization and for optimal utilization of guanine	III	5.97957	5.47249	4.87774	4.01792	2.8679	1.67807	-0.736966	-2.32193	CAUGUAUAUA	III	II	-0.296	4	72.3348	3.20839
YJR070C	LIA1	Deoxyhypusine hydroxylase; HEAT-repeat containing metalloenzyme that catalyzes hypusine formation; binds to and is required for the modification of Hyp2p (eIF5A); complements S. pombe mmd1 mutants defective in mitochondrial positioning; protein abundance increases in response to DNA replication stress	III	5.41278	5.0045	4.22497	3.51096	3.20163	0.765535	-1.73697	0	GUUAUAUAUA		II	NA	6	418.73	18.5726
YDL107W	MSS2	Peripherally bound inner membrane protein of the mitochondrial matrix; involved in membrane insertion of C-terminus of Cox2p, interacts genetically and physically with Cox18p	III	3.96347	3.72247	3.32193	3.03562	2.40599	1.63227	0.263034	-1.73697	CUUGUAAAUA			-0.366	11	8.09789	0.359179
YHR024C	MAS2	Alpha subunit of the mitochondrial processing protease (MPP); essential processing enzyme that cleaves the N-terminal targeting sequences from mitochondrially imported proteins	III	5.50144	4.96809	4.30012	3.76553	2.56072	0.765535	-0.736966	-1.73697	UCUGUAUAUA			-0.576	13	63.5346	2.81806
YMR083W	ADH3	Mitochondrial alcohol dehydrogenase isozyme III; involved in the shuttling of mitochondrial NADH to the cytosol under anaerobic conditions and ethanol production	III	4.73877	4.34341	3.58496	2.82782	1.32193	0.765535	-1.73697	0	UUUAUAAAUA			NA	9	427.297	18.9526
YML025C	YML6	Mitochondrial ribosomal protein of the large subunit; has similarity to E. coli L4 ribosomal protein and human mitoribosomal MRP-L4 protein; essential for viability, unlike most other mitoribosomal proteins	III	4.29278	4.1127	3.81762	3.30743	2.72247	2.07039	0.847997	-0.321928	UCUGUAAAUA			-0.592	14	29.9548	1.32863
YGL001C	ERG26	C-3 sterol dehydrogenase; catalyzes the second of three steps required to remove two C-4 methyl groups from an intermediate in ergosterol biosynthesis; human homolog NSDHL implicated in CK syndrome, and can complement yeast null mutant	III	4.07039	3.53605	3.26303	3.12101	2.45943	1.43296	0.263034	-3.32193	CAUGUAAAUA			-0.409	9	88.8134	3.93929
YFR007W	YFH7	Putative kinase with similarity to the PRK/URK/PANK kinase subfamily; the PRK/URK/PANK subfamily of P-loop kinases is also known as phosphoribulokinase/uridine kinase/bacterial pantothenate kinase	III	5.24793	4.89239	4.52982	4	3.12101	2.26303	0.584963	-2.32193	CUUGUAUAUA			-0.752	2	14.4779	0.642161
YOR201C	MRM1	Ribose methyltransferase; modifies a functionally critical, conserved nucleotide in mitochondrial 21S rRNA	III	5.29646	4.91648	4.63807	3.99096	2.45943	0.485427	-1.73697	0	CCUAUAUACA			-0.088	15	33.8039	1.49936
YGR285C	ZUO1	Ribosome-associated chaperone; zuotin functions in ribosome biogenesis and, in partnership with Ssz1p and SSb1/2, as a chaperone for nascent polypeptide chains; contains a DnaJ domain and functions as a J-protein partner for Ssb1p and Ssb2p	III	6.50779	5.26303	4.09592	2.23266	1	0.765535	-2.32193	-2.32193	AAUGUAUACG	IV	III	NA	5	790.905	35.0803
YMR287C	DSS1	3'-5' exoribonuclease; component of the mitochondrial degradosome along with the ATP-dependent RNA helicase Suv3p; the degradosome associates with the ribosome and mediates turnover of aberrant or unprocessed RNAs	III	4.56682	4.22497	3.90689	3.41954	3.03562	1.926	0.137504	-1.32193	CUUGUAAAUA			-0.065	14	16.7484	0.742868
YOL077W-A	ATP19	Subunit k of the mitochondrial F1F0 ATP synthase; F1F0 ATP synthase is a large, evolutionarily conserved enzyme complex required for ATP synthesis; associated only with the dimeric form of ATP synthase	III	5.01792	4.21723	3.12101	2.63227	1.72247	-0.152003	-0.514573	-0.514573	UUUGUACAUA			-0.211	4	92.3493	4.09612
YDR175C	RSM24	Mitochondrial ribosomal protein of the small subunit	III	4.20945	4.16189	3.80735	3.52356	3.3505	1.88752	-0.152003	-3.32193	CCUGUAUAUA			-0.448	14	34.0684	1.51109
YGR150C	CCM1	Mitochondrial 15S rRNA-binding protein; required for intron removal of COB and COX1 pre-mRNAs; has separable roles in stabilizing mitochondrial 15S rRNA and in maturation of the COB and COX1 mRNAs; contains pentatricopeptide repeat (PPR) motifs; mutant is respiratory deficient and has defective plasma membrane electron transport	III	4.83794	4.69488	4.3147	3.65535	3.16993	2.07039	0.263034	-0.152003	CCUGUAAAUA			-0.418	14	24.0474	1.06661
YGR171C	MSM1	Mitochondrial methionyl-tRNA synthetase (MetRS); functions as a monomer in mitochondrial protein synthesis; functions similarly to cytoplasmic MetRS although the cytoplasmic form contains a zinc-binding domain not found in Msm1p	III	5.45286	5.20555	4.91169	4.45943	3.53605	1.926	-1.32193	0	ACUGUAAAUA			-0.44	15	18.5655	0.823468
YHR038W	RRF1	Mitochondrial ribosome recycling factor; essential for mitochondrial protein synthesis and for the maintenance of the respiratory function of mitochondria	III	4.60881	4.45286	4.20163	3.89724	3.33628	2	0.925999	-1.32193	CUUGUACAUA			NA	14	19.1814	0.850784
YNL070W	TOM7	Component of the TOM (translocase of outer membrane) complex; responsible for recognition and initial import steps for all mitochondrially directed proteins; promotes assembly and stability of the TOM complex	III	4.55459	4.39232	4.24031	3.98185	3.45943	2.43296	0.263034	-1.32193	CAUGUACAUA			-0.58	7	198.467	8.80294
YBL076C	ILS1	Cytoplasmic isoleucine-tRNA synthetase; target of the G1-specific inhibitor reveromycin A	III	6.23458	5.39575	4.38543	3.32193	2.29278	0.137504	-0.152003	-1.73697	CAUAUAAAUA	III	II	NA	5	722.227	32.0341
YGL018C	JAC1	Specialized J-protein that functions in Fe-S cluster biogenesis; functions with Hsp70 in Fe-S cluster biogenesis in mitochondria; involved in iron metabolism; contains a J domain typical to J-type chaperones; localizes to the mitochondrial matrix	III	4.24793	3.97269	3.57289	2.848	2	1.1375	-1	0	AAUGUAAAUA			-0.499	6	23.0803	1.02372
YOR091W	TMA46	Protein of unknown function that associates with translating ribosomes; interacts with GTPase Rbg1p	III	3.60881	3.21723	3.10434	2.80735	2.1375	-0.152003	-0.514573	-0.736966	ACUGUAUAUA	IV	IV	0.109	4	138.652	6.14985
YDR376W	ARH1	Oxidoreductase of the mitochondrial inner membrane; involved in cytoplasmic and mitochondrial iron homeostasis and required for activity of Fe-S cluster-containing enzymes; one of the few mitochondrial proteins essential for viability	III	5.27799	4.66676	3.81762	3.03562	1.96347	1.26303	-0.321928	-2.32193	AAUGUAAAUA			-0.106	8	29.5197	1.30933
YGR165W	MRPS35	Mitochondrial ribosomal protein of the small subunit; null mutant does not grow on glycerol, is sensitive to 2,4-dichlorophenol, and accumulates large lipid droplets	III	4.16189	4	3.79701	3.18587	2.03562	1.32193	0.137504	-1.73697	CUUGUACAUA			-0.515	11	45.7772	2.03043
YKR095W-A	PCC1	Component of the EKC/KEOPS protein complex; EKC/KEOPS complex is required for t6A tRNA modification and telomeric TG1-3 recombination; may have role in transcription; other complex members are Kae1p, Gon7p, Bud32p, and Cgi121p	III	4.66676	4.37156	3.91648	3.10434	2	0.765535	-0.152003	-0.514573	AGUGUACAUA		IV	0.215	1	66.5298	2.95091
YOL033W	MSE1	Mitochondrial glutamyl-tRNA synthetase; predicted to be palmitoylated	III	3.54844	3.48543	3.32193	3.01792	2.51096	1.48543	0.678072	-1.32193	CAUGUAAAUA			NA	11	15.5425	0.68938
YOR045W	TOM6	Component of the TOM (translocase of outer membrane) complex; responsible for recognition and initial import steps for all mitochondrially directed proteins; promotes assembly and stability of the TOM complex	III	5.88509	5.54226	5.07039	4.37851	3.52356	2.23266	-0.736966	-2.32193	CCUGUAUAUA			NA	10	165.567	7.34365
YBR037C	SCO1	Copper-binding protein of mitochondrial inner membrane; required for cytochrome c oxidase activity and respiration; may function to deliver copper to cytochrome c oxidase; similar to thioredoxins; SCO1 has a paralog, SCO2, that arose from the whole genome duplication	III	5.91886	5.59991	5.0268	4.37156	3.24793	1.88752	-2.32193	-3.32193	CUUGUAUAUA			-0.265	15	19.4964	0.864755
YOR004W	UTP23	Component of the small subunit processome; involved in 40S ribosomal subunit biogenesis; interacts with snR30 and is required for dissociation of snR30 from large pre-ribosomal particles; has homology to PINc domain protein Fcf1p, although the PINc domain of Utp23p is not required for function; essential protein	III	3.79701	3.23266	3.08746	2.94486	2.65535	1.48543	0.137504	-0.514573	AAUGUACAUA	III	IV	0.468	2	105.629	4.68512
YBL059W	0	Putative protein of unknown function; the authentic, non-tagged protein is detected in highly purified mitochondria in high-throughput studies; YBL059W has a paralog, YER093C-A, that arose from the whole genome duplication	III	4.39232	4.08746	3.54844	3.05311	2.70044	0.584963	-1.73697	0	GAUUUAAAUA			0.025	10	11.824	0.524451
YGL088W	0	Dubious open reading frame; unlikely to encode a functional protein, based on available experimental and comparative sequence data; partially overlaps snR10, a snoRNA required for preRNA processing	III	4.46597	4.23266	3.85798	3.26303	2.45943	1.48543	0.584963	0	CUUGUAUAUA			NA	#N/A	0.440605	0.0195429
YGL107C	RMD9	Mitochondrial protein required for respiratory growth; mutant phenotype and genetic interactions suggest a role in delivering mt mRNAs to ribosomes; located on matrix face of the inner membrane and loosely associated with mitoribosomes; RMD9 has a paralog, YBR238C, that arose from the whole genome duplication	III	4.74953	4.47249	4.10434	3.73335	3.18587	1.926	0.485427	-1.73697	CUUGUAAAUA			-0.341	13	34.2513	1.5192
YDL217C	TIM22	Essential core component of the mitochondrial TIM22 complex; involved in insertion of polytopic proteins into the inner membrane; forms the channel through which proteins are imported	III	4.74953	4.47249	4.14568	3.80735	3.18587	2.1375	0.584963	-1.32193	UUUGUAAAUA			-0.275	14	39.612	1.75698
YDL075W	RPL31A	Ribosomal 60S subunit protein L31A; associates with karyopherin Sxm1p; loss of both Rpl31p and Rpl39p confers lethality; homologous to mammalian ribosomal protein L31, no bacterial homolog; RPL31A has a paralog, RPL31B, that arose from the whole genome duplication	III	6.10014	5.61176	5.06609	4.18587	2.37851	0.678072	-1	-3.32193	CUUGUACAAA	IV	II	NA	4	1498.37	66.4597
YKR067W	GPT2	Glycerol-3-phosphate/dihydroxyacetone phosphate sn-1 acyltransferase; located in lipid particles and the ER; involved in the stepwise acylation of glycerol-3-phosphate and dihydroxyacetone in lipid biosynthesis; the most conserved motifs and functionally relevant residues are oriented towards the ER lumen	III	4.88753	4.45943	4.20163	3.9542	3.41954	1.53605	0	-1	UUUGUAAAUA	IV	III	-0.32	8	16.8853	0.748942
YPL173W	MRPL40	Mitochondrial ribosomal protein of the large subunit	III	3.8679	3.83794	3.43296	3.29278	3.12101	2.26303	0.925999	-1.73697	CCUGUAUAUA			-0.722	14	35.9624	1.5951
YPL098C	MGR2	Subunit of the TIM23 translocase complex; acts to couple Tim21p with the core Tim23 translocase; provides quality control for insertion of membrane proteins by regulating their release into the inner membrane by the TIM23 complex; absolutely required for mitochondrial import of presequence-containing proteins at elevated temperature; required for viability of cells lacking the mitochondrial genom…	III	5.43296	4.93074	4.30743	3.54844	2.7866	2.03562	-0.736966	-1.32193	CAUGUAUUUA			-0.729	14	100.14	4.44167
YJR101W	RSM26	Mitochondrial ribosomal protein of the small subunit	III	5.38197	5.06178	4.35755	3.88753	2.63227	1.67807	-0.514573	-1.73697	ACUGUAAAUA		II	-0.304	15	65.0459	2.88509
YML028W	TSA1	Thioredoxin peroxidase; acts as both ribosome-associated and free cytoplasmic antioxidant; self-associates to form high-molecular weight chaperone complex under oxidative stress; chaperone activity essential for growth in zinc deficiency; required for telomere length maintenance; protein abundance increases, forms cytoplasmic foci during DNA replication stress; TSA1 has a paralog, TSA2, that aros…	III	5.25927	4.55459	3.8679	2.80735	1.848	-0.152003	-0.736966	0	UCUAUAUAUA	III	III	NA	3	2142.28	95.0199
YGL030W	RPL30	Ribosomal 60S subunit protein L30; involved in pre-rRNA processing in the nucleolus; autoregulates splicing of its transcript; homologous to mammalian ribosomal protein L30, no bacterial homolog	III	4.1127	3.93546	3.52356	3.18587	2.60881	1.67807	0.584963	-1.32193	CAUGUAAAUA		IV	NA	4	1966.39	87.2186
YMR228W	MTF1	Mitochondrial RNA polymerase specificity factor; has structural similarity to S-adenosylmethionine-dependent methyltransferases and functional similarity to bacterial sigma-factors; Mtf1p interacts with and stabilizes the Rpo41p-promoter complex, enhancing DNA bending and melting to facilitate pre-initiation open complex formation	III	4.93546	4.6837	4.45943	4.10434	2.72247	1.07039	-0.152003	-1	CGUGUGAAUA			-0.198	12	22.4939	0.997712
YDR155C	CPR1	Cytoplasmic peptidyl-prolyl cis-trans isomerase (cyclophilin); catalyzes the cis-trans isomerization of peptide bonds N-terminal to proline residues; binds the drug cyclosporin A; N-terminally propionylated in vivo; protein abundance increases in response to DNA replication stress	III	5.19771	4.2555	3.63227	3	2.23266	0.678072	-1.32193	-2.32193	UAUGUAUAUG	III	III	NA	9	935.756	41.5051
YDR097C	MSH6	Protein required for mismatch repair in mitosis and meiosis; forms a complex with Msh2p to repair both single-base & insertion-deletion mispairs; also involved in interstrand cross-link repair; potentially phosphorylated by Cdc28p	III	4.16189	3.99096	3.70044	3.47249	3.07039	2.56072	0.485427	0.137504	GAUGUAUGUA	IV	IV	-0.209	4	37.2878	1.65389
YPL187W	MF(ALPHA)1	Mating pheromone alpha-factor, made by alpha cells; interacts with mating type a cells to induce cell cycle arrest and other responses leading to mating; also encoded by MF(ALPHA)2, although MF(ALPHA)1 produces most alpha-factor; MF(ALPHA)1 has a paralog, MF(ALPHA)2, that arose from the whole genome duplication	III	5.33985	4.89239	4.24031	3.56072	2.48543	1.63227	0.584963	-1.73697	CUCGUACAAA	II	I	NA	1	1924.21	85.3475
YIL069C	RPS24B	Protein component of the small (40S) ribosomal subunit; homologous to mammalian ribosomal protein S24, no bacterial homolog; RPS24B has a paralog, RPS24A, that arose from the whole genome duplication	III	4.8679	4.1127	3.56072	2.76553	1.926	1.07039	0.678072	-1.32193	CAUGUAUUAA	I	I	NA	5	495.88	21.9946
YER026C	CHO1	Phosphatidylserine synthase; functions in phospholipid biosynthesis; catalyzes the reaction CDP-diaclyglycerol + L-serine = CMP + L-1-phosphatidylserine, transcriptionally repressed by myo-inositol and choline	III	5.23266	4.58496	3.7761	2.7866	1.32193	0.137504	-0.736966	-2.32193	UUUGUACAUA	III	III	0.131	12	139.577	6.19088
YIL098C	FMC1	Mitochondrial matrix protein; required for assembly or stability at high temperature of the F1 sector of mitochondrial F1F0 ATP synthase; null mutant temperature sensitive growth on glycerol is suppressed by multicopy expression of Odc1p	III	3.81762	3.54844	3.16993	2.76553	2.1375	0.765535	-0.736966	-1.32193	UUUGUAAAUA			-0.977	11	26.4907	1.17499
YER182W	FMP10	Putative protein of unknown function; the authentic, non-tagged protein is detected in highly purified mitochondria in high-throughput studies	III	2.67807	2.58496	2.40599	2.26303	2.10434	1.63227	0.678072	0	CAUGUAAAUA			-0.747	4	23.446	1.03994
YGL103W	RPL28	Ribosomal 60S subunit protein L28; homologous to mammalian ribosomal protein L27A and bacterial L15; may have peptidyl transferase activity; can mutate to cycloheximide resistance	III	7.17991	5.926	5.02237	3.85798	2.40599	0.263034	-1	-3.32193	CAUAUAUAAA	II	I	NA	9	2217.26	98.3457
YHL033C	RPL8A	Ribosomal 60S subunit protein L8A; required for processing of 27SA3 pre-rRNA to 27SB pre-rRNA during assembly of large ribosomal subunit; depletion leads to a turnover of pre-rRNA; L8 binds to Domain I of 25S and 5.8 S rRNAs; mutation results in decreased amounts of free 60S subunits; homologous to mammalian ribosomal protein L7A, no bacterial homolog; RPL8A has a paralog, RPL8B, that arose from …	III	5.7866	5.23649	4.88753	4.24031	3.12101	1.07039	-0.736966	0	GUUGUAAAUA		I	NA	5	1171.3	51.9524
YHR047C	AAP1	Arginine/alanine amino peptidase; overproduction stimulates glycogen accumulation; AAP1 has a paralog, APE2, that arose from the whole genome duplication	III	5.03122	4.56072	4.04439	3.26303	1.80736	-0.321928	-1.32193	-1.73697	CGUGUAAUUA		III	0.196	9	151.715	6.72927
YPL097W	MSY1	Mitochondrial tyrosyl-tRNA synthetase	III	4.76022	4.38543	4.06178	3.15381	2.7866	1.37851	0.378512	-2.32193	CUUGUAAAUA			-0.751	16	16.7355	0.742296
YMR060C	SAM37	Component of the Sorting and Assembly Machinery (SAM) complex; the SAM (or TOB) complex is located in the mitochondrial outer membrane; binds precursors of beta-barrel proteins and facilitates their outer membrane insertion; contributes to SAM complex stability	III	4.60288	4.27799	3.93546	3.23266	2.70044	2.07039	1.37851	-0.736966	AAUGCAGAAA			0.034	7	21.9409	0.973183
YDR381C-A	0	Protein of unknown function; localized to the mitochondrial outer membrane	III	4.45943	4.06178	3.45943	2.56072	1.848	0	-0.514573	-1.73697	UAUGUAUAUA			-1.058	10	15.1981	0.674107
YOL023W	IFM1	Mitochondrial translation initiation factor 2	III	3.53605	3.3505	3.12101	2.1375	1.96347	1.32193	0.765535	0.378512	ACUGUACAUA			-0.635	12	12.719	0.564146
YHR109W	CTM1	Cytochrome c lysine methyltransferase; trimethylates residue 72 of apo-cytochrome c (Cyc1p) in the cytosol; not required for normal respiratory growth	III	3.79701	3.57289	3.21723	3.07039	2.29278	2.07039	0.925999	0	CUUGUAUAUA			-0.235	10	10.8295	0.480338
YNL315C	ATP11	Molecular chaperone; required for the assembly of alpha and beta subunits into the F1 sector of mitochondrial F1F0 ATP synthase; N-terminally propionylated in vivo	III	3.848	3.59694	3.33628	3.10434	2.60881	1.96347	1.07039	-0.321928	CCUGUAAAUA			-1.079	13	56.3804	2.50073
YGR181W	TIM13	Mitochondrial intermembrane space protein; forms a complex with Tim8p that delivers a subset of hydrophobic proteins to the TIM22 complex for insertion into the inner membrane	III	4.8679	4.66676	4.27053	3.72247	3.15381	1.58496	-1.32193	0	CUUGUAUAUA			-0.402	12	123.378	5.47237
YNR036C	MRPS12	Mitochondrial protein; may interact with ribosomes based on co-purification experiments; similar to E. coli and human mitochondrial S12 ribosomal proteins	III	4.05311	3.76553	3.32193	2.94486	2.37851	1.43296	0.137504	-1.32193	UUUGUAAAUA			-0.723	14	114.639	5.0848
YOL152W	FRE7	Putative ferric reductase with similarity to Fre2p; expression induced by low copper levels	III	4.76553	4.32912	3.7115	3.1375	2.1375	0.263034	-2.32193	0	CAUGUAAAUA		IV	NA	8	1.94066	0.0860772
YMR188C	MRPS17	Mitochondrial ribosomal protein of the small subunit	III	5.37851	5.06609	4.67807	4.14568	2.88753	1.1375	-1.32193	-1.32193	UCUGUAAAUA		IV	-0.39	14	38.0378	1.68715
YER043C	SAH1	S-adenosyl-L-homocysteine hydrolase; catabolizes S-adenosyl-L-homocysteine which is formed after donation of the activated methyl group of S-adenosyl-L-methionine (AdoMet) to an acceptor; regulates cellular lipid homoeostasis by regulating phosphatidylcholine(PC)synthesis and triacylglycerol (TG) levels	III	6.37504	5.49185	4.60288	3.59694	2.51096	0.263034	-2.32193	0	CCUAUAUAUA	IV	III	NA	6	1113.29	49.3794
YGR112W	SHY1	Mitochondrial inner membrane protein required for complex IV assembly; associates with complex IV assembly intermediates and complex III/complex IV supercomplexes; similar to human SURF1 involved in Leigh Syndrome; complex IV is also known as cytochrome c oxidase	III	3.40599	3.12101	2.88753	2.74416	2.1375	1	-0.514573	-2.32193	CUUGUACAUA			-0.149	13	11.8403	0.525174
YGR037C	ACB1	Acyl-CoA-binding protein; transports newly synthesized acyl-CoA esters from fatty acid synthetase (Fas1p-Fas2p) to acyl-CoA-consuming processes; subject to starvation-induced, Grh1p-mediated unconventional secretion; protein abundance increases in response to DNA replication stress	III	4.38543	3.81762	3.24793	2.43296	0.925999	-0.514573	-2.32193	-2.32193	UAUGUACAUU	III	II	NA	3	863.369	38.2945
YCL049C	0	Protein of unknown function; localizes to membrane fraction; YCL049C is not an essential gene	III	3.47249	3.18587	2.37851	1.72247	1.48543	-0.152003	-1	-3.32193	CUUGUGAAUA			-0.037	0	20.7788	0.921638
YDR393W	SHE9	Protein required for normal mitochondrial morphology; mitochondrial inner membrane protein; may be involved in fission of the inner membrane; forms a homo-oligomeric complex	III	4.1375	3.76553	3.32193	2.26303	1.1375	0.378512	-0.514573	-1.73697	CUUGUACAUA			-0.918	8	19.1022	0.847271
YNL333W	SNZ2	Member of a stationary phase-induced gene family; transcription of SNZ2 is induced prior to diauxic shift, and also in the absence of thiamin in a Thi2p-dependent manner; forms a coregulated gene pair with SNO2; interacts with Thi11p	III	3.49825	2.848	2.3505	1.48543	1.1375	-0.736966	-1	-3.32193	UUUGUAUAUA			NA	10	0.91793	0.0407145
YJL131C	AIM23	Mitochondrial translation initiation factor 3 (IF3, mIF3); evolutionarily conserved; binds to E. coli ribosomes in vitro; null mutant displays severe respiratory growth defect and elevated frequency of mitochondrial genome loss	III	3.73335	3.26303	2.7866	2.20163	1.32193	-0.514573	0	0	CUUGUACAUA			-0.209	12	7.23249	0.320795
YHR176W	FMO1	Flavin-containing monooxygenase; localized to the cytoplasmic face of the ER membrane; catalyzes oxidation of biological thiols to maintain the ER redox buffer ratio for correct folding of disulfide-bonded proteins	III	3.15381	2.98185	2.70044	2.43296	1.80736	0.765535	-2.32193	0	CAUGUAUAUA			0.127	3	4.84066	0.214706
YEL055C	POL5	DNA Polymerase phi; has sequence similarity to the human MybBP1A and weak sequence similarity to B-type DNA polymerases, not required for chromosomal DNA replication; required for the synthesis of rRNA	III	3.67807	2.98185	2.16993	1.67807	0	0	0	0	CUUGUAAAAU	II	III	0.085	4	130.407	5.78417
YOR125C	CAT5	Protein required for ubiquinone (Coenzyme Q) biosynthesis; localizes to the matrix face of the mitochondrial inner membrane in a large complex with ubiquinone biosynthetic enzymes; required for gluconeogenic gene activation	III	4.16993	3.81762	3.41954	2.90689	1.72247	0.584963	-1.32193	0	CAUGUAUAAA			0.525	9	38.1658	1.69283
YCL017C	NFS1	Cysteine desulfurase; involved in iron-sulfur cluster (Fe/S) biogenesis and in thio-modification of mitochondrial and cytoplasmic tRNAs; essential protein located predominantly in mitochondria	III	4.20945	3.7761	3.37851	2.3505	1.43296	-0.321928	-1.32193	-3.32193	UAUGUACAAA	IV		-0.448	11	94.2044	4.17841
YMR066W	SOV1	Mitochondrial protein of unknown function	III	3.27799	2.82782	2.53605	1.20163	1	-0.321928	-3.32193	-3.32193	CGUGUACAUA			NA	5	11.2493	0.498958
YML030W	RCF1	Cytochrome c oxidase subunit; required for assembly of the Complex III-Complex IV supercomplex, and for assembly of Cox13p and Rcf2p into cytochrome c oxidase; similar to Rcf2p, and either Rcf1p or Rcf2p is required for late-stage assembly of the Cox12p and Cox13p subunits and for cytochrome c oxidase activity; required for growth under hypoxic conditions; member of the hypoxia induced gene famil…	III	4.32193	4.04439	3.48543	2.94486	1.37851	-0.514573	-3.32193	0	GCUGUAAAUA			-0.608	13	27.8684	1.23609
YJR077C	MIR1	Mitochondrial phosphate carrier; imports inorganic phosphate into mitochondria; functionally redundant with Pic2p but more abundant than Pic2p under normal conditions; phosphorylated	III	4.15381	3.83794	3.05311	2.32193	0.925999	-1.73697	0	0	CAUGCAUAUA			NA	8	155.437	6.89436
YPR011C	0	Mitochondrial transporter; major substrates are adenosine 5'-phosphosulfate (APS) and 3'-phospho-adenosine 5'-phosphosulfate (PAPS); member of the mitochondrial carrier family; the authentic, non-tagged protein is detected in highly purified mitochondria in high-throughput studies	III	2.63227	2.43296	2.40599	1.80736	1.80736	1.43296	-1.73697	0	CCUGUAUAUA			-0.187	7	20.0334	0.888574
YGR270W	YTA7	Protein that localizes to chromatin; has a role in regulation of histone gene expression; has a bromodomain-like region that interacts with the N-terminal tail of histone H3, and an ATPase domain; relocalizes to the cytosol in response to hypoxia; potentially phosphorylated by Cdc28p	III	4	3.33628	2.7866	1.63227	1.20163	-0.152003	0	0	CUUGUAUAUA			-0.035	6	49.8547	2.21129
YMR039C	SUB1	Transcriptional coactivator; facilitates elongation through factors that modify RNAP II; role in peroxide resistance involving Rad2p; role in nonhomologous end-joining (NHEJ) of ds breaks in plasmid DNA, but not chromosomal DNA; role in the hyperosmotic stress response through polymerase recruitment at RNAP II and RNAP III genes; protein abundance increases in response to DNA replication stress	III	2.926	2.7866	2.45943	1.80736	0.847997	-0.152003	-2.32193	-3.32193	CUUGUACAUU			-0.158	4	40.1332	1.78009
YGR207C	CIR1	Mitochondrial protein that interacts with frataxin (Yfh1p); putative ortholog of mammalian electron transfer flavoprotein complex subunit ETF-beta; may have a role in oxidative stress response	III	3.99096	3.18587	2.60881	2.03562	0.678072	0.378512	-1.32193	-1.32193	UGUGUACAUA			-0.012	9	80.3056	3.56193
YDR471W	RPL27B	Ribosomal 60S subunit protein L27B; homologous to mammalian ribosomal protein L27, no bacterial homolog; RPL27B has a paralog, RPL27A, that arose from the whole genome duplication	III	3.82782	3.30743	2.60881	2.29278	1.76554	1.26303	-1	-1.73697	AUUGUAUAAA	II	I	NA	5	738.653	32.7627
YOR198C	BFR1	Component of mRNP complexes associated with polyribosomes; involved in localization of mRNAs to P bodies; implicated in secretion and nuclear segregation; multicopy suppressor of BFA (Brefeldin A) sensitivity	III	4.12928	3.29278	2.48543	1.48543	-0.514573	-1.32193	0	0	UAUGUAUAUA			NA	7	348.101	15.4399
YKL194C	MST1	Mitochondrial threonyl-tRNA synthetase; aminoacylates both the canonical threonine tRNA tT(UGU)Q1 and the unusual threonine tRNA tT(UAG)Q2 in vitro; lacks a typical editing domain, but has pre-transfer editing activity stimulated by the unusual tRNA-Thr	III	3.9542	3.45943	2.7866	1.67807	-0.152003	-0.736966	-3.32193	0	CCUGUAAAUA			-0.67	12	17.7678	0.788083
YGR202C	PCT1	Cholinephosphate cytidylyltransferase; a rate-determining enzyme of the CDP-choline pathway for phosphatidylcholine synthesis, inhibited by Sec14p, activated upon lipid-binding; contains an element within the regulatory domain involved in both silencing and activation of enzymatic activity	III	4.74416	4.23266	3.47249	2.40599	0.678072	-1.32193	-1.73697	-3.32193	UAUGUACAUA			-0.047	8	34.3734	1.52462
YBR253W	SRB6	Subunit of the RNA polymerase II mediator complex; associates with core polymerase subunits to form the RNA polymerase II holoenzyme; essential for transcriptional regulation	III	3.29278	3.24793	2.82782	2.51096	2	0	-1.32193	-2.32193	CAUAUACAUA			0.118	2	44.3543	1.96732
YBR022W	POA1	Phosphatase that is highly specific for ADP-ribose 1''-phosphate; a tRNA splicing metabolite; may have a role in regulation of tRNA splicing	III	3.1375	2.82782	2.58496	1.72247	1.26303	-0.152003	-1	-1.73697	CUUGUAAGUA			-0.317	6	31.5805	1.40074
YLR325C	RPL38	Ribosomal 60S subunit protein L38; homologous to mammalian ribosomal protein L38, no bacterial homolog	III	3.74416	2.67807	2.07039	1.26303	0.584963	-0.152003	-0.736966	-1.32193	UGUGUAAUAA	II	I	NA	3	3324.77	147.469
YMR166C	MME1	Transporter of the mitochondrial inner membrane that exports magnesium; involved in mitochondrial Mg2+ homeostasis; has similarity to human mitochondrial ATP-Mg/Pi carriers	III	3.65535	3.23266	2.82782	1.72247	1	-1	-3.32193	0	UUUGUAUAUA			-0.502	12	17.0891	0.757981
YGL063W	PUS2	Mitochondrial tRNA:pseudouridine synthase; acts at positions 27 and 28, but not at position 72; efficiently and rapidly targeted to mitochondria, specifically dedicated to mitochondrial tRNA modification; mutation also affects pseudouridylation of some nuclear-encoded mRNAs; PUS2 has a paralog, PUS1, that arose from the whole genome duplication	III	3.29278	3.05311	2.51096	2.32193	1.926	0.137504	-2.32193	0	GCUGUAUAUA	IV		-0.334	2	11.1882	0.496249
YNL083W	SAL1	ADP/ATP transporter; member of the Ca2+-binding subfamily of mitochondrial carriers, with two EF-hand motifs; transport activity of either Sal1p or Pet9p is critical for viability; polymorphic in different S. cerevisiae strains	III	3.20163	2.98185	2.70044	2.43296	1.1375	-0.152003	-0.514573	-1.73697	CAUGUACAUA			-0.174	9	9.65529	0.428257
YER017C	AFG3	Mitochondrial inner membrane m-AAA protease component; mediates degradation of misfolded or unassembled proteins and is also required for correct assembly of mitochondrial enzyme complexes; involved in cytoplasmic mRNA translation and aging	III	2.26303	2.1375	2	1.53605	0.925999	0.584963	-0.321928	-1.73697	CAUGUAUAUA			-0.648	15	40.1597	1.78127
YJL122W	ALB1	Shuttling pre-60S factor; involved in the biogenesis of ribosomal large subunit; interacts directly with Arx1p; responsible for Tif6p recycling defects in absence of Rei1p	III	3.21723	2.94486	2.65535	1.67807	1.48543	-0.514573	-2.32193	-3.32193	AGUAUAAAUA	I	II	0.295	7	233.274	10.3468
YOR017W	PET127	Protein with a role in 5'-end processing of mitochondrial RNAs; located in the mitochondrial membrane	III	4.49185	4	3.08746	2.03562	-1	-3.32193	0	0	CUUGUAAUUA			-0.092	10	18.9163	0.839026
YCL057C-A	MIC10	Conserved component of the MICOS complex; MICOS (formerly MINOS or MitOS) is a mitochondrial inner membrane complex that extends into the intermembrane space and has a role in the maintenance of crista junctions, inner membrane architecture, and formation of contact sites to the outer membrane; forms a subcomplex with Mic12p and Mic27p whose assembly and stability requires cardiolipin; homo-oligo…	III	4.32912	3.87774	3.33628	2.56072	1.72247	-0.321928	-1	-1.32193	0			NA	6	84.2384	3.73637
YOR064C	YNG1	Subunit of the NuA3 histone acetyltransferase complex; this complex acetylates histone H3; contains PHD finger domain that interacts with methylated histone H3; shares significant sequence identity with the human candidate tumor suppressor p33-ING1 in C-terminal region	III	2.70044	2.63227	2.32193	2.20163	2	0.263034	-0.152003	-0.514573	UAUGUACAUG		III	0.042	6	14.6741	0.650863
YMR115W	MGR3	Subunit of the mitochondrial (mt) i-AAA protease supercomplex; i-AAA degrades misfolded mitochondrial proteins; forms a subcomplex with Mgr1p that binds to substrates to facilitate proteolysis; required for growth of cells lacking mtDNA	III	3.88753	3.80735	3.62059	2.63227	1.58496	-0.321928	0	0	ACUGUACAUA			-0.344	10	31.2318	1.38527
YKL155C	RSM22	Mitochondrial ribosomal protein of the small subunit; also predicted to be an S-adenosylmethionine-dependent RNA methyltransferase	III	3.63227	3.43296	3.08746	2.56072	0.925999	-0.514573	-1.73697	0	UAUAUAUAUA			-0.626	14	25.4649	1.12949
YJL184W	GON7	Component of the EKC/KEOPS protein complex; EKC/KEOPS complex is required for t6A tRNA modification and telomeric TG1-3 recombination; may have role in transcription; implicated in osmotic stress response; other complex members are Kae1p, Cgi121p, Pcc1p, and Bud32p	III	3.9542	2.94486	2.74416	1.848	1.43296	0	-3.32193	-3.32193	AGUGUAUAUA		III	0.089	7	62.106	2.75469
YPR024W	YME1	Catalytic subunit of i-AAA protease complex; complex is located in mitochondrial inner membrane; responsible for degradation of unfolded or misfolded mitochondrial gene products; serves as nonconventional translocation motor to pull PNPase into intermembrane space; also has role in intermembrane space protein folding; mutation causes elevated rate of mitochondrial turnover; human homolog YME1L1 c…	III	4.16993	3.7761	3.48543	3.10434	2.45943	1.32193	-2.32193	-3.32193	AUUGUAAAUA			-0.212	12	64.9513	2.8809
YHR168W	MTG2	Putative GTPase; member of the Obg family; peripheral protein of the mitochondrial inner membrane that associates with the large ribosomal subunit; required for mitochondrial translation, possibly via a role in ribosome assembly	III	3.23266	2.72247	2.32193	2.29278	1.48543	1.32193	-0.736966	0	AUUGUAAAUA			-0.273	13	10.1568	0.450502
YLR044C	PDC1	Major of three pyruvate decarboxylase isozymes; key enzyme in alcoholic fermentation; decarboxylates pyruvate to acetaldehyde; involved in amino acid catabolism; subject to glucose-, ethanol-, and autoregulation; activated by phosphorylation in response to glucose levels; N-terminally propionylated in vivo	III	3.70044	3.12101	2.60881	1.96347	0.925999	0.263034	-2.32193	-3.32193	UAUGUAUAUU	IV	III	NA	5	13857.1	614.627
YPL190C	NAB3	RNA-binding protein, subunit of Nrd1 complex (Nrd1p-Nab3p-Sen1p); complex interacts with exosome to mediate 3'-end formation of some mRNAs, snRNAs, snoRNAs, and CUTs; required for termination of non-poly(A) transcripts and efficient splicing; Nrd1-Nab3 pathway appears to have a role in rapid suppression of some genes when cells are shifted to poor growth conditions, indicating role for Nrd1-Nab3 …	III	2.40599	2.23266	2.10434	1.848	1.48543	1	0	0	CUUGUACAUU	II		-0.019	2	78.5244	3.48293
YGL089C	MF(ALPHA)2	Mating pheromone alpha-factor, made by alpha cells; interacts with mating type a cells to induce cell cycle arrest and other responses leading to mating; also encoded by MF(ALPHA)1, which is more highly expressed; MF(ALPHA)2 has a paralog, MF(ALPHA)1, that arose from the whole genome duplication	III	3.53605	2.67807	2	1.76554	0.678072	0	-0.736966	-3.32193	CAUUUAAAUA			NA	2	1030.11	45.6901
YOR211C	MGM1	Mitochondrial GTPase, present in complex with Ugo1p and Fzo1p; required for mitochondrial morphology, fusion, and genome maintenance; exists as long and short form with different distributions; ratio of long to short forms is regulated by Psd1p; homolog of human OPA1 involved in autosomal dominant optic atrophy	III	3.72247	3.44626	2.94486	2.60881	1.96347	0	-0.736966	0	UUUGUAAAUA			-0.28	14	32.1897	1.42776
YPL220W	RPL1A	Ribosomal 60S subunit protein L1A; N-terminally acetylated; homologous to mammalian ribosomal protein L10A and bacterial L1; RPL1A has a paralog, RPL1B, that arose from the whole genome duplication; rpl1a rpl1b double null mutation is lethal	III	4.47897	3.63227	2.80735	2	0.847997	-0.152003	-1.73697	-3.32193	UUUGUAUUUA	II	I	NA	4	194.125	8.61034
YPR040W	TIP41	Protein that interacts with Tap42p, which regulates PP2A; component of the TOR (target of rapamycin) signaling pathway; protein abundance increases in response to DNA replication stress	III	2.88753	2.76553	2.76553	2.56072	-0.152003	-0.736966	0	0	UCUGUAAAUA			-0.778	5	25.7916	1.14398
YDR002W	YRB1	Ran GTPase binding protein; involved in nuclear protein import and RNA export, ubiquitin-mediated protein degradation during the cell cycle; shuttles between the nucleus and cytoplasm; is essential; homolog of human RanBP1	III	4.30743	3.48543	3.01792	2.20163	1.67807	-0.514573	0	0	CGUGCAUAUA			NA	7	730.192	32.3874
YJL209W	CBP1	Mitochondrial protein, regulator of COB mRNA stability and translation; interacts with the 5'-untranslated region of the COB mRNA; found in a complex at the inner membrane along with Pet309p; localizes to mitochondrial foci upon DNA replication stress	III	4.98641	4.43296	3.96347	3.33628	1.1375	-1	-1.73697	0	UCUGUAAAUA			-0.326	5	22.7562	1.00934
YJR057W	CDC8	Thymidylate and uridylate kinase; functions in de novo biosynthesis of pyrimidine deoxyribonucleotides; converts dTMP to dTDP and dUMP to dUTP; essential for mitotic and meiotic DNA replication; homologous to S. pombe Tmp1p	III	4.41954	4	3.48543	3.1375	0.485427	-3.32193	-3.32193	0	UCUGUACAUA			-0.182	6	42.8798	1.90192
YNL006W	LST8	Protein required for the transport of Gap1p; required for the transport of amino acid permease Gap1p from the Golgi to the cell surface; component of the TOR signaling pathway; associates with both Tor1p and Tor2p; contains a WD-repeat	III	3.41954	3.01792	2.26303	1.88752	1.07039	-0.152003	-1.32193	-1.32193	UUUGUAAAUA			-0.035	3	30.5698	1.35591
YBL022C	PIM1	ATP-dependent Lon protease; involved in degradation of misfolded proteins in mitochondria; required for biogenesis and maintenance of mitochondria	III	3.9542	3.52356	3.36457	3.03562	-0.321928	-1.73697	-3.32193	0	UCUGUAAAUA			-0.137	14	104.738	4.64563
YPR140W	TAZ1	Lyso-phosphatidylcholine acyltransferase; required for normal phospholipid content of mitochondrial membranes; major determinant of the final acyl chain composition of the mitochondrial-specific phospholipid cardiolipin; mutations in human ortholog tafazzin (TAZ) cause Barth syndrome, a rare X-linked disease characterized by skeletal and cardiomyopathy and bouts of cyclic neutropenia; a specific …	III	4.12101	3.54844	3.16993	2.32193	0.765535	0.263034	-1.73697	-3.32193	CGUGUAAAUA			-0.646	14	31.3608	1.391
YBL099W	ATP1	Alpha subunit of the F1 sector of mitochondrial F1F0 ATP synthase; which is a large, evolutionarily conserved enzyme complex required for ATP synthesis; F1 translationally regulates ATP6 and ATP8 expression to achieve a balanced output of ATP synthase genes encoded in nucleus and mitochondria; phosphorylated; N-terminally propionylated in vivo	III	3.79701	3.12101	2.7866	2.3505	1.88752	1	-1.32193	-2.32193	AAUGUAAAUA		III	NA	6	228.492	10.1347
YDL208W	NHP2	Protein related to mammalian high mobility group (HMG) proteins; nuclear protein; essential for function of H/ACA-type snoRNPs, which are involved in 18S rRNA processing	III	2.67807	2.10434	1.80736	1.63227	1.43296	0.378512	-1.32193	-1.32193	UCUGUAUAUU	I		NA	4	572.26	25.3824
YER090W	TRP2	Anthranilate synthase; catalyzes the initial step of tryptophan biosynthesis, forms multifunctional hetero-oligomeric anthranilate synthase:indole-3-glycerol phosphate synthase enzyme complex with Trp3p	III	2.926	2.58496	2.1375	1.926	1.32193	0.263034	-1	-3.32193	CGUGUAUAUA			0.1	6	131.157	5.81741
YOL021C	DIS3	Exosome core complex catalytic subunit; has both endonuclease and 3'-5' exonuclease activity; involved in 3'-5' RNA processing and degradation in both the nucleus and the cytoplasm; role in degradation of tRNAs; has similarity to E. coli RNase R and to human DIS3; mutations in Dis3p corresponding to human mutations implicated in multiple myeloma cause phenotypes suggesting impaired exosome functi…	III	3.85798	3.05311	2.58496	2.20163	-1	-1	-1.32193	0	CUCAUAUAUA	I	III	-0.345	9	84.3615	3.74183
YNL301C	RPL18B	Ribosomal 60S subunit protein L18B; homologous to mammalian ribosomal protein L18, no bacterial homolog; RPL18B has a paralog, RPL18A, that arose from the whole genome duplication	III	3.45943	2.98185	2.3505	1.76554	1.20163	-1.32193	-3.32193	-3.32193	CCUAUGCAUA	I	I	NA	7	163.203	7.23879
YMR012W	CLU1	Subunit of the eukaryotic translation initiation factor 3 (eIF3); component of unknown function; deletion causes defects in mitochondrial organization but not in growth or translation initiation; can rescue cytokinesis and mitochondrial organization defects of the Dictyostelium cluA- mutant	III	4.89724	3.94486	3.30743	2.20163	1.43296	-0.152003	-1.73697	-2.32193	CUUGUAUAUA			-0.454	15	343.856	15.2516
YLL011W	SOF1	Protein required for biogenesis of 40S (small) ribosomal subunit; has similarity to the beta subunit of trimeric G-proteins and the splicing factor Prp4p; essential gene	III	3.6893	3	2.10434	1.48543	0.678072	0	-2.32193	-2.32193	UCUGUAUAUA	I	II	-0.04	6	112.164	4.975
YGL200C	EMP24	Component of the p24 complex; role in misfolded protein quality control; binds to GPI anchor proteins and mediates their efficient transport from the ER to the Golgi; integral membrane protein that associates with endoplasmic reticulum-derived COPII-coated vesicles	III	2.74416	2.45943	2	1.80736	1	-0.321928	-1	-2.32193	CAUGUAAAUA			NA	6	320.211	14.2028
YDL184C	RPL41A	Ribosomal 60S subunit protein L41A; comprises only 25 amino acids; rpl41a rpl41b double null mutant is viable; homologous to mammalian ribosomal protein L41, no bacterial homolog; RPL41A has a paralog, RPL41B, that arose from the whole genome duplication	III	4.71699	4.16993	3.44626	2.98185	1.37851	-1.32193	-3.32193	-3.32193	CCUAUAUAAA	II	II	-1.416	1	2977.47	132.065
YHR009C	TDA3	Putative oxidoreductase involved in late endosome to Golgi transport; physical and genetical interactions with Btn2p; null mutant is viable, has extended S phase, and sensitive to expression of top1-T722A allele; similar to human FOXRED1	III	2.96347	2.51096	2.26303	1.72247	1	-0.321928	-2.32193	-3.32193	UUUGUACAUA			-0.161	5	116.703	5.17632
YNL295W	MRX6	Protein that associates with mitochondrial ribosome	III	2.65535	2.07039	1.848	1.848	1.848	-0.736966	0	0	CGUGUAAAUA			0.016	5	20.8061	0.922847
YDR308C	SRB7	Subunit of the RNA polymerase II mediator complex; associates with core polymerase subunits to form the RNA polymerase II holoenzyme; essential for transcriptional regulation; target of the global repressor Tup1p	III	3.15381	2.80735	2.26303	1.926	1.76554	0.765535	-2.32193	-3.32193	CUUAUAAAUA	II	II	-0.39	3	52.7011	2.33754
YPL063W	TIM50	Essential component of the TIM23 complex; acts as receptor for the translocase of the inner mitochondrial membrane (TIM23) complex guiding incoming precursors from the TOM complex; may control the gating of the Tim23p-Tim17p channel	III	4.56072	4.15381	3.52356	2.90689	1.96347	-0.152003	-1.73697	-3.32193	CAUGUGAAUA			-0.174	14	145.372	6.44794
YAL044C	GCV3	H subunit of the mitochondrial glycine decarboxylase complex; glycine decarboxylase is required for the catabolism of glycine to 5,10-methylene-THF; also required for all protein lipoylation; expression is regulated by levels of 5,10-methylene-THF	III	4.90207	3.82782	2.70044	1.43296	1.07039	-2.32193	-2.32193	-3.32193	UAUGUAUAUA	III	III	NA	3	263.376	11.6819
YMR198W	CIK1	Kinesin-associated protein; required for both karyogamy and mitotic spindle organization, interacts stably and specifically with Kar3p and may function to target this kinesin to a specific cellular role; locus encodes a long and short transcript with differing functions; CIK1 has a paralog, VIK1, that arose from the whole genome duplication	III	2.29278	2.16993	2.16993	2.07039	2.03562	0	-0.321928	0	GAUGUAAAUU			-0.037	4	13.3802	0.593472
YBR034C	HMT1	Nuclear SAM-dependent mono- and asymmetric methyltransferase; modifies hnRNPs, including Npl3p and Hrp1p, affecting their activity and nuclear export; methylates U1 snRNP protein Snp1p, ribosomal protein Rps2p, and histones H3 and H4; interacts genetically with genes encoding components of Rpd3(L) and this interaction is important for Rpd3 recruitment to the subtelomeric region.	III	3.76553	2.8679	2.07039	1.20163	0.485427	-0.736966	-2.32193	0	CAUGUGCAUU	I	I	-0.003	7	287.154	12.7366
YBR044C	TCM62	Protein involved in assembly of the succinate dehydrogenase complex; mitochondrial; putative chaperone	III	3.44626	2.80735	2.1375	1.848	1.32193	-1	-3.32193	0	AUUGUAAAUA			0.399	6	15.7815	0.699985
YLR312W-A	MRPL15	Mitochondrial ribosomal protein of the large subunit	III	3.07039	2.72247	2.26303	1.37851	1	-0.321928	-3.32193	-3.32193	UCUGUAAAUA			-0.608	14	43.9438	1.94911
YIL051C	MMF1	Mitochondrial protein required for transamination of isoleucine; but not of valine or leucine; may regulate specificity of branched-chain transaminases Bat1p and Bat2p; induction of expression in response to stress is mediated by a Hog1p-regulated antisense RNA and gene looping; interacts genetically with mitochondrial ribosomal protein genes; MMF1 has a paralog, HMF1, that arose from the whole g…	III	3.43296	2.80735	2.32193	2.16993	1.80736	0.584963	-1.73697	0	AGUGUACAUU	II	II	NA	4	933.849	41.4206
YDR487C	RIB3	3,4-dihydroxy-2-butanone-4-phosphate synthase (DHBP synthase); required for riboflavin biosynthesis from ribulose-5-phosphate, also has an unrelated function in mitochondrial respiration	III	4.53605	3.74416	3.07039	1.96347	0.137504	-0.736966	-2.32193	-3.32193	CAUGUAUAUA		III	-0.017	7	228.735	10.1455
YDL183C	0	Protein that may form an active mitochondrial KHE system; mitochondrial inner-membrane protein; non-essential gene; KHE system stands for K+/H+ exchanger system	III	3.7761	3.24793	2.60881	2.10434	0.925999	0	-2.32193	0	CAUGUAAAUA			NA	4	6.1239	0.271624
YLR106C	MDN1	Huge dynein-related AAA-type ATPase (midasin); forms extended pre-60S particle with the Rix1 complex (Rix1p-Ipi1p-Ipi3p); acts in removal of ribosomal biogenesis factors at successive steps of pre-60S assembly and export from nucleus	IV	3.21723	2.26303	1.67807	0.378512	-0.152003	-0.736966	-1	0	ACUGUAAAAA	II		-0.047	5	72.3137	3.20745
YDR210W	0	Predicted tail-anchored plasma membrane protein; contains a conserved CYSTM module; related proteins in other organisms may be involved in response to stress; green fluorescent protein (GFP)-fusion protein localizes to the cell periphery	IV	1.72247	0.765535	0	0	0	-0.152003	-3.32193	0	AAUGUAUAUA	IV		0.169	0	185.763	8.23944
YDR201W	SPC19	Essential subunit of the Dam1 complex (aka DASH complex); complex couples kinetochores to the force produced by MT depolymerization thereby aiding in chromosome segregation; also localized to nuclear side of spindle pole body	IV	2.40599	2	1.926	1.43296	1.07039	-3.32193	-3.32193	0	CUUGUAGAUA	III	I	-0.029	2	28.5783	1.26758
YDR502C	SAM2	S-adenosylmethionine synthetase; catalyzes transfer of the adenosyl group of ATP to the sulfur atom of methionine; comparative analysis suggests that a mitochondrially targeted form may result from translation starting at a non-canonical codon upstream of the annotated start codon	IV	2.67807	2	0.765535	0.485427	0	-1.32193	-2.32193	-2.32193	CAUGUAAUUA		II	0.034	8	188.511	8.36136
YNL227C	JJJ1	Co-chaperone that stimulates the ATPase activity of Ssa1p; required for a late step of ribosome biogenesis; associated with the cytosolic large ribosomal subunit; contains a J-domain; mutation causes defects in fluid-phase endocytosis	IV	3.01792	2.51096	1.1375	1.07039	1.07039	-3.32193	0	0	ACUAUACAAA			-0.302	5	26.9705	1.19627
YJL003W	COX16	Mitochondrial inner membrane protein; required for assembly of cytochrome c oxidase	IV	2.40599	1.848	1.32193	0.584963	-0.321928	-1.73697	-2.32193	-3.32193	AUUGUAAAUA			-0.417	13	32.7198	1.45128
YER056C-A	RPL34A	Ribosomal 60S subunit protein L34A; homologous to mammalian ribosomal protein L34, no bacterial homolog; RPL34A has a paralog, RPL34B, that arose from the whole genome duplication	IV	3.23266	2.60881	2.37851	1.43296	-1.32193	-1.73697	0	0	UCUAUGAAUA	IV	II	NA	0	934.198	41.436
YJR100C	AIM25	Putative protein of unknown function; non-tagged protein is detected in purified mitochondria in high-throughput studies; similar to murine NOR1; null mutant is viable and displays elevated frequency of mitochondrial genome loss	IV	1.926	1.67807	1.53605	0	-0.514573	-1	-1	-1.73697	UCUGUAAAUA			-0.359	6	21.8873	0.970805
YPR165W	RHO1	GTP-binding protein of the rho subfamily of Ras-like proteins; involved in establishment of cell polarity; regulates protein kinase C (Pkc1p) and the cell wall synthesizing enzyme 1,3-beta-glucan synthase (Fks1p and Gsc2p)	IV	2.70044	2	1.76554	1.37851	-0.514573	-2.32193	0	0	CCUAUAUAUA		IV	NA	7	478.277	21.2138
YDL213C	NOP6	rRNA-binding protein required for 40S ribosomal subunit biogenesis; contains an RNA recognition motif (RRM); hydrophilin essential to overcome the stress of the desiccation-rehydration process; NOP6 may be a fungal-specific gene as no homologs have been yet identified in higher eukaryotes	IV	2.63227	2.26303	1.76554	0.485427	0	-0.152003	-0.321928	-0.514573	AACAUAAAUA	I	II	-0.018	5	107.817	4.78221
YML110C	COQ5	2-hexaprenyl-6-methoxy-1,4-benzoquinone methyltransferase; involved in ubiquinone (Coenzyme Q) biosynthesis; localizes to the matrix face of the mitochondrial inner membrane in a large complex with other ubiquinone biosynthetic enzymes	IV	2.03562	1.48543	0.678072	0.263034	0	-2.32193	-2.32193	-3.32193	ACUGUACAUA			-0.379	13	135.296	6.00101
YOR021C	SFM1	SPOUT methyltransferase; catalyzes omega-monomethylation of Rps3p on Arg-146; not an essential gene; predicted to be involved in rRNA processing and ribosome biogenesis and in biopolymer catabolism	IV	2.74416	2.26303	1.43296	1	-0.321928	-0.321928	-1	-3.32193	AUUGUAUAUA		IV	NA	9	222.251	9.85788
YIL052C	RPL34B	Ribosomal 60S subunit protein L34B; homologous to mammalian ribosomal protein L34, no bacterial homolog; RPL34B has a paralog, RPL34A, that arose from the whole genome duplication	IV	2.98185	2.3505	2.10434	1.67807	-0.514573	-1.73697	-3.32193	0	CAUGCAGAUA	IV	III	NA	0	1034.56	45.8878
YIL158W	AIM20	Putative protein of unknown function; overexpression causes cell cycle delay or arrest; green fluorescent protein (GFP)-fusion protein localizes to vacuole; null mutant displays elevated frequency of mitochondrial genome loss; relocalizes from nucleus to cytoplasm upon DNA replication stress; AIM20 has a paralog, SKG1, that arose from the whole genome duplication	IV	2.3505	1.53605	1	0.378512	-0.736966	0	0	0	UAUGCAUAUA		II	-0.167	2	62.3034	2.76345
YOR184W	SER1	3-phosphoserine aminotransferase; catalyzes the formation of phosphoserine from 3-phosphohydroxypyruvate, required for serine and glycine biosynthesis; regulated by the general control of amino acid biosynthesis mediated by Gcn4p; protein abundance increases in response to DNA replication stress	IV	1.63227	1.43296	0.925999	0.925999	-0.514573	-1.32193	-1.73697	0	CCUGUAAUUU		IV	NA	6	198.963	8.82492
YPL032C	SVL3	Protein of unknown function; mutant phenotype suggests a potential role in vacuolar function; green fluorescent protein (GFP)-fusion protein localizes to the cell periphery, cytoplasm, bud, and bud neck; relocalizes from bud neck to cytoplasm upon DNA replication stress; SVL3 has a paralog, PAM1, that arose from the whole genome duplication	IV	1.80736	1.76554	1.67807	1.58496	1.32193	0.263034	-2.32193	0	UUUGUAUAUA	IV		0.452	8	76.0612	3.37367
YKR031C	SPO14	Phospholipase D; catalyzes the hydrolysis of phosphatidylcholine, producing choline and phosphatidic acid; involved in Sec14p-independent secretion; required for meiosis and spore formation; differently regulated in secretion and meiosis; participates in transcription initiation and/or early elongation of specific genes; interacts with "foot domain" of RNA polymerase II; deletion results in abnor…	IV	1.80736	1.67807	1.20163	0.847997	0.485427	0.263034	0	0	AAUAUAUAUA			0.1	7	26.6722	1.18304
YBL011W	SCT1	Glycerol 3-phosphate/dihydroxyacetone phosphate sn-1 acyltransferase; dual substrate-specific acyltransferase of the glycerolipid biosynthesis pathway; prefers 16-carbon fatty acids; similar to Gpt2p; gene is constitutively transcribed	IV	3.08746	2.65535	2.23266	1.67807	0.765535	-1.73697	0	0	GUUGUAAAUA			0.171	8	66.7556	2.96092
YDR047W	HEM12	Uroporphyrinogen decarboxylase; catalyzes the fifth step in the heme biosynthetic pathway; localizes to both the cytoplasm and nucleus; a hem12 mutant has phenotypes similar to patients with porphyria cutanea tarda	IV	3.08746	2.58496	2.16993	1.76554	1	-2.32193	0	0	UAUGUAAAUA			-0.216	12	51.3923	2.27949
YDR031W	MIX14	Mitochondrial intermembrane space protein of unknown function; required for normal oxygen consumption; contains twin cysteine-x9-cysteine motifs; protein abundance increases in response to DNA replication stress	IV	2.1375	1.926	1.76554	1.20163	0.584963	-3.32193	-3.32193	0	CCUGUGAAUA			0.596	8	23.1456	1.02661
YBL027W	RPL19B	Ribosomal 60S subunit protein L19B; rpl19a and rpl19b single null mutations result in slow growth, while the double null mutation is lethal; homologous to mammalian ribosomal protein L19, no bacterial homolog; RPL19B has a paralog, RPL19A, that arose from the whole genome duplication	IV	2.76553	2.48543	1.37851	0.925999	0.847997	0	0	0	UCUAUAUAUG	II	I	NA	2	2218.02	98.3794
YMR257C	PET111	Mitochondrial translational activator specific for the COX2 mRNA; located in the mitochondrial inner membrane	IV	2.45943	2.07039	1.926	1.63227	-1.73697	-2.32193	-2.32193	-3.32193	CAUGUAAAUA			-0.197	14	13.4285	0.595617
YBL021C	HAP3	Subunit of the Hap2p/3p/4p/5p CCAAT-binding complex; complex is heme-activated and glucose-repressed; complex is a transcriptional activator and global regulator of respiratory gene expression; contains sequences contributing to both complex assembly and DNA binding	IV	3.16993	2.80735	2.3505	0.765535	-0.736966	-1	0	0	CGUGUAAUUA		II	-0.087	8	20.2658	0.898885
YEL052W	AFG1	Protein that may act as a chaperone for cytochrome c oxidase subunits; conserved protein; may act as a chaperone in the degradation of misfolded or unassembled cytochrome c oxidase subunits; localized to matrix face of the mitochondrial inner membrane; member of the AAA family but lacks a protease domain	IV	3.07039	2.51096	2	1.63227	0.137504	-0.514573	-3.32193	0	CUUGUAUUUA			0.591	9	40.554	1.79876
YNL268W	LYP1	Lysine permease; one of three amino acid permeases (Alp1p, Can1p, Lyp1p) responsible for uptake of cationic amino acids	IV	2.926	2.58496	2.53605	1.96347	0.765535	-3.32193	0	0	UUUAUGUAUA	II	III	0.09	3	100.435	4.45477
YGR103W	NOP7	Component of several different pre-ribosomal particles; forms a complex with Ytm1p and Erb1p that is required for maturation of the large ribosomal subunit; required for exit from G<sub>0</sub> and the initiation of cell proliferation	IV	2.94486	1.926	1.07039	0.263034	-1.32193	-1.32193	-2.32193	-2.32193	CCUGUACAUU	I	III	-0.328	8	414.371	18.3793
YDL198C	GGC1	Mitochondrial GTP/GDP transporter; essential for mitochondrial genome maintenance; has a role in mitochondrial iron transport; member of the mitochondrial carrier family	IV	2.65535	2.23266	2.07039	1.43296	-0.736966	-1	-1	-1	CUUGUGAAUA		II	-0.189	16	57.5642	2.55324
YGR238C	KEL2	Protein that negatively regulates mitotic exit; forms a complex with Kel1p and Bud14p that regulates Bnr1p (formin) to affect actin cable assembly, cytokinesis, and polarized growth; functions in a complex with Kel1p, interacts with Tem1p and Lte1p; localizes to regions of polarized growth; potential Cdc28p substrate	IV	2.32193	1.37851	0.765535	0.137504	0	-1.32193	-1.32193	-3.32193	AUUGUAAACA			-0.391	5	9.10952	0.40405
YDL044C	MTF2	Mitochondrial protein that interacts with mitochondrial RNA polymerase; interacts with an N-terminal region of mitochondrial RNA polymerase (Rpo41p) and couples RNA processing and translation to transcription	IV	2.88753	2.53605	1.20163	1	0.485427	0.378512	-2.32193	-3.32193	CUUGUAAAUA			-0.177	14	13.6632	0.606027
YGR192C	TDH3	Glyceraldehyde-3-phosphate dehydrogenase (GAPDH), isozyme 3; involved in glycolysis and gluconeogenesis; tetramer that catalyzes the reaction of glyceraldehyde-3-phosphate to 1,3 bis-phosphoglycerate; detected in the cytoplasm and cell wall; GAPDH-derived antimicrobial peptides secreted by S. cerevisiae are active against a wide variety of wine-related yeasts and bacteria; binds AU-rich RNA	IV	1.848	1.58496	0.925999	0	-0.736966	-1	-2.32193	-2.32193	CUUGCAUUUA	IV	III	NA	4	14607.9	647.928
YDL185W	VMA1	Subunit A of the V1 peripheral membrane domain of V-ATPase; protein precursor undergoes self-catalyzed splicing to yield the extein Tfp1p and the intein Vde (PI-SceI), which is a site-specific endonuclease; the V1 peripheral membrane domain of the vacuolar H+-ATPase (V-ATPase) has eight subunits; involved in methionine restriction extension of chronological lifespan in an autophagy-dependent mann…	IV	2.90689	1.07039	1	0.378512	-0.736966	0	0	0	UAUAUAAAUA			NA	5	765.024	33.9324
YJL177W	RPL17B	Ribosomal 60S subunit protein L17B; homologous to mammalian ribosomal protein L17 and bacterial L22; RPL17B has a paralog, RPL17A, that arose from the whole genome duplication	IV	1.67807	1.48543	1.20163	0.678072	0	-0.514573	-1.73697	-2.32193	CAUGUACAUA			NA	7	845.452	37.4997
YMR207C	HFA1	Mitochondrial acetyl-coenzyme A carboxylase; catalyzes production of malonyl-CoA in mitochondrial fatty acid biosynthesis; relocalizes from mitochondrion to cytoplasm upon DNA replication stress; genetic and comparative analysis suggests that translation begins at a non-canonical (Ile) start codon at -372 relative to the annotated start codon	IV	2.67807	2.07039	1.53605	1.26303	0	0	0	0	UAUGUAUAUA			-0.276	11	11.4379	0.507325
YPR114W	0	Putative protein of unknown function	IV	3.32193	2.45943	1.37851	0.137504	-0.514573	-0.514573	-1.32193	-2.32193	CAUGUGCAUA			-0.074	3	128.816	5.71357
YGR172C	YIP1	Integral membrane protein; required for the biogenesis of ER-derived COPII transport vesicles; interacts with Yif1p and Yos1p; localizes to the Golgi, the ER, and COPII vesicles; homolog of human YIPF4	IV	3.53605	3.03562	2.07039	1.58496	0.378512	-3.32193	0	0	UUUGUAUAUA	IV	IV	0.148	8	86.0375	3.81616
YKL208W	CBT1	Protein involved in 5' RNA end processing; substrates include mitochondrial COB, 15S_rRNA, and RPM1 transcripts; may also have a role in 3' end processing of the COB pre-mRNA; displays genetic interaction with cell cycle-regulated kinase Dbf2p	IV	2.51096	2.26303	1.72247	1.53605	0.847997	-2.32193	0	0	ACUGUACAUA			-0.216	1	10.1416	0.449827
YLR239C	LIP2	Lipoyl ligase; involved in the modification of mitochondrial enzymes by the attachment of lipoic acid groups	IV	2.23266	1.96347	1.32193	0.584963	0.137504	-0.514573	0	0	CAUGUGAAUA			-0.571	8	20.5324	0.910706
YMR064W	AEP1	Protein required for expression of the mitochondrial OLI1 gene; mitochondrial OLI1 gene encodes subunit 9 of F1-F0 ATP synthase	IV	2.07039	1.67807	1.07039	0.925999	0.263034	-3.32193	0	0	AAUGUAAAUA			0.283	6	24.6876	1.09501
YER177W	BMH1	14-3-3 protein, major isoform; controls proteome at post-transcriptional level, binds proteins and DNA, involved in regulation of exocytosis, vesicle transport, Ras/MAPK and rapamycin-sensitive signaling, aggresome formation, spindle position checkpoint; protein increases in abundance and relative distribution to the nucleus increases upon DNA replication stress; antiapoptotic gene similar to hum…	IV	3.05311	2.37851	1.63227	0.847997	-0.152003	-1	-1.73697	-2.32193	UAUGUAUAUA			NA	8	790.444	35.0599
YER030W	CHZ1	Histone chaperone for Htz1p/H2A-H2B dimer; required for the stabilization of the Chz1p-Htz1-H2B complex; has overlapping function with Nap1p; null mutant displays weak sensitivity to MMS and benomyl; contains a highly conserved CHZ motif; protein abundance increases in response to DNA replication stress	IV	3.64386	2.16993	1.53605	0.137504	-0.321928	-0.736966	-3.32193	0	UAUGUAUAUA	IV	I	-0.118	6	116.965	5.18795
YLR175W	CBF5	Pseudouridine synthase catalytic subunit of box H/ACA snoRNPs; acts on large and small rRNAs, on snRNA U2, and on some mRNAs; mutations in human ortholog dyskerin cause the disorder dyskeratosis congenita; small nucleolar ribonucleoprotein particles are also known as snoRNPs	IV	2.8679	2.58496	2.03562	0.765535	-1	-1.73697	-3.32193	-3.32193	UGUGUAUAUU	I	II	NA	4	373.744	16.5773
YNL209W	SSB2	Cytoplasmic ATPase that is a ribosome-associated molecular chaperone; functions with J-protein partner Zuo1p; may be involved in the folding of newly-synthesized polypeptide chains; member of the HSP70 family; SSB2 has a paralog, SSB1, that arose from the whole genome duplication	IV	2.29278	1.848	1.20163	0.263034	-0.321928	-0.736966	-1.73697	-1.73697	CAUAUAUAUA		IV	NA	8	1328.17	58.9104
YFR042W	KEG1	Integral membrane protein of the ER; physically interacts with Kre6p; has a role in the synthesis of beta-1,6-glucan in the cell wall; required for cell viability	IV	2.53605	2.45943	1.63227	1	-0.152003	-1.32193	0	0	UCUGUACAUA			0.167	2	29.5099	1.3089
YDR268W	MSW1	Mitochondrial tryptophanyl-tRNA synthetase	IV	2.63227	1.96347	1.72247	1.07039	0.584963	-1.73697	-3.32193	0	CUUGUAUAUA			-0.549	14	17.8222	0.790497
YPR187W	RPO26	RNA polymerase subunit ABC23; common to RNA polymerases I, II, and III; part of central core; similar to bacterial omega subunit	IV	2.26303	1.72247	1.20163	0.678072	0.263034	-0.514573	0	0	UGUGUAUAUA	I	II	NA	9	282.26	12.5195
YMR169C	ALD3	Cytoplasmic aldehyde dehydrogenase; involved in beta-alanine synthesis; uses NAD+ as the preferred coenzyme; very similar to Ald2p; expression is induced by stress and repressed by glucose	IV	2.72247	2.3505	2.16993	2.10434	-1	-2.32193	-2.32193	0	UAUAUAAAUG			NA	9	2.43048	0.107803
YOL120C	RPL18A	Ribosomal 60S subunit protein L18A; intron of RPL18A pre-mRNA forms stem-loop structures that are a target for Rnt1p cleavage leading to degradation; homologous to mammalian ribosomal protein L18, no bacterial homolog; RPL18A has a paralog, RPL18B, that arose from the whole genome duplication	IV	2.1375	1.96347	1.07039	0.584963	0.263034	-0.736966	-1	-2.32193	CCCGUACAUU	III	II	NA	9	945.938	41.9568
YJR007W	SUI2	Alpha subunit of the translation initiation factor eIF2; eIF2 is involved in identification of the start codon; phosphorylation of Ser51 is required for regulation of translation by inhibiting the exchange of GDP for GTP; protein abundance increases in response to DNA replication stress	IV	2.67807	1.926	1.32193	1	0.263034	-1	-2.32193	0	CUUGUACAUU			NA	4	407.662	18.0817
YLR348C	DIC1	Mitochondrial dicarboxylate carrier; integral membrane protein, catalyzes a dicarboxylate-phosphate exchange across the inner mitochondrial membrane, transports cytoplasmic dicarboxylates into the mitochondrial matrix	IV	2.76553	2.23266	1.72247	1.58496	1.32193	-1	-1	-1	UAUAUACAUA			-0.404	5	101.603	4.50657
YNL044W	YIP3	Protein localized to COPII vesicles; proposed to be involved in ER to Golgi transport; interacts with members of the Rab GTPase family and Yip1p; also interacts with Rtn1p	IV	3.29278	2.74416	1.76554	1.1375	0.378512	-1.73697	-2.32193	-2.32193	AUUGUAUACA	II	II	0.079	5	126.699	5.61968
YIL076W	SEC28	Epsilon-COP subunit of the coatomer; regulates retrograde Golgi-to-ER protein traffic; stabilizes Cop1p, the alpha-COP and the coatomer complex; non-essential for cell growth; protein abundance increases in response to DNA replication stress	IV	2.53605	2.10434	1.07039	0.378512	0	0	0	0	CAUGUAUAUG			0.017	5	170.401	7.55806
YML035C	AMD1	AMP deaminase; tetrameric enzyme that catalyzes the deamination of AMP to form IMP and ammonia; thought to be involved in regulation of intracellular purine (adenine, guanine, and inosine) nucleotide pools	IV	2.88753	2.16993	1.53605	1.26303	0.485427	-1	-1.32193	-2.32193	CAUGUAUAUA			-0.502	10	84.3508	3.74135
YNL240C	NAR1	Subunit of the cytosolic iron-sulfur (FeS) protein assembly machinery; required for maturation of cytosolic and nuclear FeS proteins and for normal resistance to oxidative stress; deficiency results in shortened lifespan and sensitivity to paraquat; homologous to human Narf	IV	3.21723	2.3505	1.20163	0.485427	-0.514573	-1	-2.32193	0	CGUGUACAUA			-0.119	9	36.3654	1.61297
YDL070W	BDF2	Protein involved in transcription initiation; acts at TATA-containing promoters; associates with the basal transcription factor TFIID; contains two bromodomains; corresponds to the C-terminal region of mammalian TAF1; redundant with Bdf1p; protein abundance increases in response to DNA replication stress; BDF2 has a paralog, BDF1, that arose from the whole genome duplication	IV	2.43296	1.63227	1.53605	1.48543	0.678072	-0.736966	-1	-1.73697	AUUGUAAAUA	III	I	0.127	6	89.1663	3.95494
YMR302C	YME2	Integral inner mitochondrial membrane protein; role in maintaining mitochondrial nucleoid structure and number; mutants exhibit an increased rate of mitochondrial DNA escape; shows some sequence similarity to exonucleases	IV	3.26303	2.56072	1.43296	0.584963	-0.321928	-0.736966	-2.32193	0	UCUGUACAUA			-0.078	7	29.5751	1.31179
YJL116C	NCA3	Protein involved in mitochondrion organization; functions with Nca2p to regulate mitochondrial expression of subunits 6 (Atp6p) and 8 (Atp8p) of the Fo-F1 ATP synthase; member of the SUN family; expression induced in cells treated with the mycotoxin patulin; NCA3 has a paralog, UTH1, that arose from the whole genome duplication	IV	1.88752	1.43296	1.1375	0.847997	0.765535	-0.321928	-1	-2.32193	CAUAUAUAUA			NA	5	7.30402	0.323967
YLR112W	0	Dubious open reading frame; unlikely to encode a functional protein, based on available experimental and comparative sequence data	IV	2.53605	2.16993	1.88752	1.20163	-0.736966	-1.73697	-2.32193	-3.32193	CAUGCGAAAG			NA	#N/A	13.9737	0.619799
YDL053C	PBP4	Pbp1p binding protein; interacts strongly with Pab1p-binding protein 1 (Pbp1p) in the yeast two-hybrid system; also interacts with Lsm12p in a copurification assay; relative distribution to the nucleus increases upon DNA replication stress	IV	3.15381	2.58496	2.40599	2.1375	0.263034	-1.73697	0	0	AGUGUAAAUA			0.028	1	79.5191	3.52704
YGR167W	CLC1	Clathrin light chain; subunit of the major coat protein involved in intracellular protein transport and endocytosis; regulates endocytic progression; thought to regulate clathrin function; the clathrin triskelion is a trimeric molecule composed of three heavy chains that radiate from a vertex and three light chains which bind noncovalently near the vertex of the triskelion	IV	3.16993	2.7866	2.07039	0.678072	0	0	0	0	ACUGUAAAUU			NA	3	175.619	7.78952
YMR290C	HAS1	ATP-dependent RNA helicase; involved in the biogenesis of 40S and 60S ribosome subunits; localizes to both the nuclear periphery and nucleolus; highly enriched in nuclear pore complex fractions; constituent of 66S pre-ribosomal particles	IV	2.32193	2	1.58496	0.925999	0.678072	-1.32193	-1.32193	-1.32193	CCUGCACAUA	I	II	0.116	10	251.524	11.1563
YHR198C	AIM18	Putative protein of unknown function; the authentic, non-tagged protein is detected in highly purified mitochondria in high-throughput studies; null mutant displays elevated frequency of mitochondrial genome loss	IV	2.58496	2.32193	1.926	1.20163	-0.152003	-1	-2.32193	-3.32193	CAUAUGCAUA			-0.234	8	16.4993	0.73182
YGL156W	AMS1	Vacuolar alpha mannosidase; involved in free oligosaccharide (fOS) degradation; delivered to the vacuole in a novel pathway separate from the secretory pathway	IV	1.67807	1.48543	1.32193	1.20163	1.1375	0.584963	-1.73697	-3.32193	CAUAUAAGUA			NA	6	3.52492	0.156347
YER131W	RPS26B	Protein component of the small (40S) ribosomal subunit; homologous to mammalian ribosomal protein S26, no bacterial homolog; RPS26B has a paralog, RPS26A, that arose from the whole genome duplication	IV	3.62059	3.01792	2.3505	1.53605	0.378512	-2.32193	-3.32193	0	AUUGUGUAUU	IV	II	NA	5	2605.74	115.577
YFL038C	YPT1	Rab family GTPase; involved in the ER-to-Golgi step of the secretory pathway; complex formation with the Rab escort protein Mrs6p is required for prenylation of Ypt1p by protein geranylgeranyltransferase type II (Bet2p-Bet4p); binds to unspliced HAC1 mRNA; regulates unfolded protein response (UPR) by promoting the decay of HAC1 RNA	IV	2.80735	2.60881	2.48543	1.32193	-0.736966	-1.32193	0	0	CAUAUAUACA		III	NA	10	431.194	19.1255
YER087C-B	SBH1	Beta subunit of Sec61p ER translocation complex (Sec61p-Sss1p-Sbh1p); involved in protein translocation into the endoplasmic reticulum; interacts with the exocyst complex and also with Rtn1p; cotranslationally N-acetylated by NatA; SBH1 has a paralog, SBH2, that arose from the whole genome duplication	IV	2.60881	2.03562	1.848	1.63227	0.485427	-0.321928	-1	0	CACGUAUAUA		IV	NA	6	278.314	12.3445
YGR161W-C	0	Putative protein of unknown function; identified by sequence comparison with hemiascomycetous yeast species	IV	1.53605	1.48543	1.37851	1.37851	1.07039	0.485427	-1.73697	0	ACUGUAAAUA			NA	0	15.8756	0.704158
YPR125W	YLH47	Mitochondrial inner membrane protein; exposed to the mitochondrial matrix; associates with mitochondrial ribosomes; NOT required for respiratory growth; homolog of human Letm1, a protein implicated in Wolf-Hirschhorn syndrome	IV	2.98185	2.72247	2	1.37851	0.485427	-0.736966	-1.73697	-3.32193	UUUGUACAUA	IV		-0.394	5	58.8962	2.61232
YKL016C	ATP7	Subunit d of the stator stalk of mitochondrial F1F0 ATP synthase; F1F0 ATP synthase is a large, evolutionarily conserved enzyme complex required for ATP synthesis	IV	2.82782	2.3505	1.88752	1.32193	-0.321928	-1.32193	0	0	CAUAUAUACA		IV	0.247	4	159.571	7.0777
YNR051C	BRE5	Ubiquitin protease cofactor; forms deubiquitination complex with Ubp3p that coregulates anterograde and retrograde transport between the endoplasmic reticulum and Golgi compartments; null is sensitive to brefeldin A	IV	3.10434	2.16993	1.48543	1.1375	0.263034	-0.736966	-2.32193	-3.32193	UAUGUACAUA		III	-0.225	4	103.695	4.59938
YLR154C	RNH203	Ribonuclease H2 subunit; required for RNase H2 activity; role in ribonucleotide excision repair; related to human AGS3 that causes Aicardi-Goutieres syndrome	IV	2.51096	2.45943	1.72247	1.72247	1.32193	0	0	0	UAUAUAUAUA			0.132	0	61.06	2.7083
YDL052C	SLC1	1-acyl-sn-glycerol-3-phosphate acyltransferase; catalyzes the acylation of lysophosphatidic acid to form phosphatidic acid, a key intermediate in lipid metabolism; enzymatic activity detected in lipid particles and microsomes	IV	2.40599	1.848	0.765535	0.485427	0.378512	-1	-1.32193	0	AAUGUAUAUA			0.065	8	98.5554	4.37139
YDR041W	RSM10	Mitochondrial ribosomal protein of the small subunit; has similarity to E. coli S10 ribosomal protein; essential for viability, unlike most other mitoribosomal proteins	IV	2.16993	1.926	1.67807	1.37851	0.584963	-1.32193	-3.32193	0	CUUGUAAAUA			-1.079	12	54.6215	2.42272
YDR177W	UBC1	Ubiquitin-conjugating enzyme; key E2 partner with Ubc4p for the anaphase-promoting complex (APC); mediates selective degradation of short-lived and abnormal proteins; plays a role in vesicle biogenesis and ER-associated protein degradation (ERAD); component of the cellular stress response; protein abundance increases in response to DNA replication stress key E2 partner with Ubc4p for the anaphase…	IV	3.05311	2.10434	1.43296	1.07039	0.485427	-1.32193	-2.32193	-2.32193	ACUGUAAAAG		IV	-0.155	9	90.3484	4.00737
YOL052C	SPE2	S-adenosylmethionine decarboxylase; required for the biosynthesis of spermidine and spermine; cells lacking Spe2p require spermine or spermidine for growth in the presence of oxygen but not when grown anaerobically	IV	3.58496	3.36457	1.848	1.1375	-0.514573	0	0	0	AAUGUAUAUA	IV	III	0.031	7	60.6599	2.69055
YNL071W	LAT1	Dihydrolipoamide acetyltransferase component (E2) of the PDC; the pyruvate dehydrogenase complex (PDC) catalyzes the oxidative decarboxylation of pyruvate to acetyl-CoA	IV	1.76554	1.37851	1.1375	0.678072	0	-1.73697	0	0	UUUGUAUAUA			NA	7	291.293	12.9202
YPL260W	0	Putative substrate of cAMP-dependent protein kinase (PKA); green fluorescent protein (GFP)-fusion protein localizes to the cytoplasm and nucleus; YPL260W is not an essential gene; protein abundance increases in response to DNA replication stress	IV	2.848	1.76554	1.20163	1.1375	-0.152003	-2.32193	0	0	UAUGUAUAUA			-0.137	11	68.2728	3.02822
YIR030W-A	0	Dubious open reading frame; unlikely to encode a functional protein, based on available experimental and comparative sequence data; overlaps ORF DAL7/YIR031C	IV	1.72247	1.72247	1.72247	1.32193	1.26303	-0.152003	-1.73697	0	CAUGUACAUC	III		NA	#N/A	0.802573	0.0355978
YGL041W-A	0	Putative protein of unknown function; conserved in fungi; identified by expression profiling and mass spectrometry	IV	2.16993	1.37851	1	0.847997	0	0	0	0	CGUGUAUAAA		III	NA	4	59.0502	2.61915
YMR236W	TAF9	Subunit (17 kDa) of TFIID and SAGA complexes; involved in RNA polymerase II transcription initiation and in chromatin modification, similar to histone H3	IV	2.926	2.43296	2	1.32193	1.1375	-2.32193	-3.32193	-3.32193	CAUGUAGAAU			0.183	7	105.524	4.6805
YLR363W-A	0	Protein of unknown function; green fluorescent protein (GFP)-fusion protein localizes to the nucleus; relocalizes from nucleus to nucleolus upon DNA replication stress	IV	1.76554	1.48543	1.20163	0.678072	0.378512	0.378512	0.137504	-2.32193	UUUGUAAAAA	I	II	-0.219	2	83.6767	3.71145
YML079W	0	Non-essential protein of unknown function; has structural resemblance to plant storage and ligand binding proteins (canavalin, glycinin, auxin binding protein) and to some enzymes (epimerase, germin); localizes to the nucleus and cytoplasm	IV	2.10434	1.32193	0.765535	0.378512	-0.736966	-2.32193	0	0	UUUGUACUUA			0.078	2	95.2203	4.22347
YER038C	KRE29	Subunit of the SMC5-SMC6 complex; this complex is involved in removal of X-shaped DNA structures that arise between sister chromatids during DNA replication and repair; heterozygous mutant shows haploinsufficiency in K1 killer toxin resistance	IV	2.48543	2.1375	1.88752	0.137504	-1.32193	-2.32193	-3.32193	0	UUUGUAAACA	IV	III	NA	1	11.0839	0.491623
YDR197W	CBS2	Mitochondrial translational activator of the COB mRNA; interacts with translating ribosomes, acts on the COB mRNA 5'-untranslated leader	IV	2.1375	1.43296	0.925999	0	-1.73697	-2.32193	-3.32193	0	CAUGUAUAUA			-0.42	4	21.1141	0.936507
YDR060W	MAK21	Constituent of 66S pre-ribosomal particles; required for large (60S) ribosomal subunit biogenesis; acts as part of a Mak21p-Noc2p-Rrp5p module that associates with nascent pre-rRNA during transcription and has a role in bigenesis of the large ribosomal subunit; involved in nuclear export of pre-ribosomes; required for maintenance of dsRNA virus; homolog of human CAATT-binding protein	IV	2.03562	1.58496	1.26303	0.765535	-1	-3.32193	-3.32193	0	GUUGUAAAUU	I	II	0.524	5	183.336	8.13179
YGL221C	NIF3	Protein of unknown function; similar to Listeria monocytogenes major sigma factor (rpoD gene product); the authentic, non-tagged protein is detected in highly purified mitochondria in high-throughput studies	IV	2.58496	1.37851	-0.321928	-0.736966	0	0	0	0	CGUGUAAAAU		IV	0.244	7	123.812	5.49166
YER078C	ICP55	Mitochondrial aminopeptidase; cleaves the N termini of at least 38 imported proteins after cleavage by the mitochondrial processing peptidase (MPP), thereby increasing their stability; member of the aminopeptidase P family	IV	2.82782	1.37851	0.263034	-0.514573	-2.32193	0	0	0	CCUGUAUAUA			-0.32	10	26.6273	1.18104
YGR255C	COQ6	Putative flavin-dependent monooxygenase; involved in ubiquinone (Coenzyme Q) biosynthesis; localizes to matrix face of mitochondrial inner membrane in a large complex with other ubiquinone biosynthetic enzymes; human homolog COQ6 can complement yeast null mutant and is implicated in steroid-resistant nephrotic syndrome (SRNS)	IV	3.16993	2.51096	1.37851	0.584963	-1.32193	-3.32193	-3.32193	0	UAUGUAAAUA			-0.491	10	45.2216	2.00579
YNR033W	ABZ1	Para-aminobenzoate (PABA) synthase; has similarity to Escherichia coli PABA synthase components PabA and PabB; required for the synthesis of para-aminobenzoic acid, an important intermediate for folate and ubiquinone Q biosynthesis; protein abundance increases in response to DNA replication stress	IV	1.80736	1.43296	0.678072	-1	-3.32193	0	0	0	UUUGUAUAUU			-0.422	13	37.6963	1.67201
YGR282C	BGL2	Endo-beta-1,3-glucanase; major protein of the cell wall, involved in cell wall maintenance; involved in incorporation of newly synthesized mannoprotein molecules into the cell wall	IV	2.32193	1.53605	0.847997	-2.32193	-3.32193	0	0	0	CAUAUAAAUA	IV	II	NA	5	743.793	32.9907
YKL104C	GFA1	Glutamine-fructose-6-phosphate amidotransferase; catalyzes the formation of glucosamine-6-P and glutamate from fructose-6-P and glutamine in the first step of chitin biosynthesis; GFA1 has a paralogous region, comprising ORFs YMR084W-YMR085W, that arose from the whole genome duplication	IV	1.72247	0.925999	0	-1.73697	0	0	0	0	UAUAUAAAUA			-0.011	8	164.604	7.30096
YEL054C	RPL12A	Ribosomal 60S subunit protein L12A; rpl12a rpl12b double mutant exhibits slow growth and slow translation; homologous to mammalian ribosomal protein L12 and bacterial L11; RPL12A has a paralog, RPL12B, that arose from the whole genome duplication	IV	2.8679	1.88752	1.1375	-0.514573	0	0	0	0	ACUGUACUUA	III	II	NA	4	2193.57	97.2952
YMR010W	0	Putative protein of unknown function; green fluorescent protein (GFP)-fusion protein localizes to the cytoplasm; YMR010W is not an essential gene; YMR010W mRNA is transcribed with ADI1	IV	1.63227	1.37851	0.378512	-1.73697	-1.73697	-1.73697	-1.73697	0	UCUGUAUAUA		IV	0.045	5	73.7577	3.2715
YGL238W	CSE1	Nuclear envelope protein that acts as a recycling factor; mediates the nuclear export of Srp1p (importin alpha) back to the cytoplasm after its import substrates have been released into the nucleoplasm, thereby allowing the participation of Srp1p in multiple rounds of nuclear import; required for accurate chromosome segregation; homolog of metazoan CAS	IV	1.76554	0.765535	0.378512	0.263034	-3.32193	0	0	0	CACGUAAAUA			0.069	8	147.711	6.55167
YBR185C	MBA1	Membrane-associated mitochondrial ribosome receptor; forms a complex with Mdm38p that may facilitate recruitment of mRNA-specific translational activators to ribosomes; possible role in protein export from the matrix to inner membrane	IV	1.48543	0.925999	0	-0.321928	-1.73697	0	0	0	UCUGUAAAUA			-0.769	16	33.7419	1.49661
YLR361C-A	0	Putative protein of unknown function	IV	2.67807	2	0.678072	-0.321928	-2.32193	-2.32193	0	0	AUUGUAUAUA			-0.546	0	20.0546	0.889514
YNL031C	HHT2	Histone H3; core histone protein required for chromatin assembly, part of heterochromatin-mediated telomeric and HM silencing; one of two identical histone H3 proteins (see HHT1); regulated by acetylation, methylation, and phosphorylation; H3K14 acetylation plays an important role in the unfolding of strongly positioned nucleosomes during repair of UV damage	IV	2.10434	1.88752	1.07039	-0.321928	-3.32193	0	0	0	CAUGUAUAAU	I	I	NA	8	1010.32	44.8124
YJR013W	GPI14	Glycosylphosphatidylinositol-alpha 1,4 mannosyltransferase I; involved in GPI anchor biosynthesis, requires Pbn1p for function; homolog of mammalian PIG-M	IV	2.29278	1.37851	1.26303	1.1375	-2.32193	-3.32193	-3.32193	0	UGUGUAAAUA			0.015	6	27.125	1.20312
YDL086W	0	Putative carboxymethylenebutenolidase; the authentic, non-tagged protein is detected in highly purified mitochondria in high-throughput studies; YDL086W is not an essential gene	IV	1.76554	-0.321928	-1	-1	-1	-1.32193	-1.32193	-1.32193	UCUGUACACG	IV	IV	-0.128	5	83.5717	3.7068
YGL122C	NAB2	Nuclear polyadenylated RNA-binding protein; required for nuclear mRNA export and poly(A) tail length control; binds nuclear pore protein Mlp1p; involved in forming export-competent mRNPs in the nucleus; autoregulates mRNA levels; related to human hnRNPs; nuclear localization sequence binds Kap104p; protein abundance increases in response to DNA replication stress	IV	3.12101	2.63227	0.925999	0.378512	-2.32193	-3.32193	0	0	GAUGUAAAUA		II	0.031	6	79.7709	3.53821
YMR318C	ADH6	NADPH-dependent medium chain alcohol dehydrogenase; has broad substrate specificity; member of the cinnamyl family of alcohol dehydrogenases; may be involved in fusel alcohol synthesis or in aldehyde tolerance; protein abundance increases in response to DNA replication stress	IV	2.80735	1.48543	1	0.137504	-1	0	0	0	UCUGUAUAUA			NA	5	352.275	15.625
YNR041C	COQ2	Para hydroxybenzoate polyprenyl transferase; catalyzes the second step in ubiquinone (coenzyme Q) biosynthesis; human COQ2, mutations in which are implicated in an increased risk of mutiple-system atrophy, is able to complement a yeast coq2 null mutant	IV	3.43296	2.29278	1.67807	0	-1.73697	-3.32193	0	0	CGUGCAUAUA			0.055	10	33.2606	1.47526
YOR224C	RPB8	RNA polymerase subunit ABC14.5; common to RNA polymerases I, II, and III	IV	1.53605	0.678072	0.584963	-0.152003	-0.736966	0	0	0	AUUGUACAUG	II	I	NA	4	401.885	17.8255
YGL226C-A	OST5	Zeta subunit of the oligosaccharyltransferase complex of the ER lumen; complex catalyzes asparagine-linked glycosylation of newly synthesized proteins	IV	2.56072	1.58496	1	0	-0.514573	-3.32193	-3.32193	-3.32193	UAUGUAAAAA	IV	III	0.019	0	115.033	5.10227
YNL282W	POP3	Subunit of both RNase MRP and nuclear RNase P; RNase MRP cleaves pre-rRNA, while nuclear RNase P cleaves tRNA precursors to generate mature 5' ends and facilitates turnover of nuclear RNAs; relocalizes to the cytosol in response to hypoxia	IV	2.96347	2.16993	1.20163	-0.152003	-3.32193	0	0	0	AAUACAUAUG			NA	3	20.4729	0.908067
YOR323C	PRO2	Gamma-glutamyl phosphate reductase; catalyzes the second step in proline biosynthesis	IV	2.1375	1.80736	1.32193	-3.32193	0	0	0	0	CGUGUAUACA	III	II	0.229	8	242.153	10.7406
YML063W	RPS1B	Ribosomal protein 10 (rp10) of the small (40S) subunit; homologous to mammalian ribosomal protein S3A, no bacterial homolog; RPS1B has a paralog, RPS1A, that arose from the whole genome duplication	IV	3.56072	2.51096	1.37851	-2.32193	0	0	0	0	CAUGUACACA		IV	NA	5	3243.14	143.848
YLR009W	RLP24	Essential protein required for ribosomal large subunit biogenesis; associated with pre-60S ribosomal subunits; stimulates the ATPase activity of Afg2p, which is required for release of Rlp24p from the pre-60S particle; has similarity to Rpl24Ap and Rpl24Bp	IV	1.848	0.584963	0	0	-1	-3.32193	0	0	CCUGUAUACU	I	II	NA	9	336.54	14.9271
YDR061W	0	Protein with similarity to ABC transporter family members; lacks predicted membrane-spanning regions; transcriptionally activated by Yrm1p along with genes involved in multidrug resistance	IV	2.10434	1.37851	0.378512	0.137504	-0.321928	0	0	0	CAUGUACAUA			-0.488	4	29.9574	1.32875
YHR064C	SSZ1	Hsp70 protein that interacts with Zuo1p (a DnaJ homolog); interacts with Zuo1p to form a ribosome-associated complex that binds the ribosome via the Zuo1p subunit; also involved in pleiotropic drug resistance via sequential activation of PDR1 and PDR5; binds ATP	IV	3.70044	2.40599	1.63227	-0.152003	-3.32193	0	0	0	UACGUAUAUA			NA	6	853.56	37.8594
YEL065W	SIT1	Ferrioxamine B transporter; member of the ARN family of transporters that specifically recognize siderophore-iron chelates; transcription is induced during iron deprivation and diauxic shift; potentially phosphorylated by Cdc28p	IV	1.926	1.32193	-0.321928	-0.514573	-1.32193	0	0	0	CAUGCACAUA			0.335	2	68.4252	3.03498
YGL058W	RAD6	Ubiquitin-conjugating enzyme (E2); involved in postreplication repair as a heterodimer with Rad18p, regulation of K63 polyubiquitination in response to oxidative stress, DSBR and checkpoint control as a heterodimer with Bre1p, ubiquitin-mediated N-end rule protein degradation as a heterodimer with Ubr1p, as well as endoplasmic reticulum-associated protein degradation (ERAD) with Ubr1p in the abse…	IV	1.43296	0.584963	0.137504	-0.736966	-3.32193	0	0	0	CAUAUAAAUA			0.175	7	106.205	4.71069
YBR011C	IPP1	Cytoplasmic inorganic pyrophosphatase (PPase); homodimer that catalyzes the rapid exchange of oxygens from Pi with water, highly expressed and essential for viability, active-site residues show identity to those from E. coli PPase	IV	2.29278	1.58496	0.378512	-0.321928	-0.736966	-2.32193	-3.32193	0	CUCAUGAAUG	IV	IV	NA	6	1566.28	69.4721
YGL135W	RPL1B	Ribosomal 60S subunit protein L1B; N-terminally acetylated; homologous to mammalian ribosomal protein L10A and bacterial L1; RPL1B has a paralog, RPL1A, that arose from the whole genome duplication; rpl1a rpl1b double null mutation is lethal	IV	1.53605	0.847997	0.678072	-0.514573	-1.73697	0	0	0	AUUAUGCAUA		III	NA	5	214.167	9.49929
YAL042W	ERV46	Protein localized to COPII-coated vesicles; forms a complex with Erv41p; involved in the membrane fusion stage of transport	IV	2.16993	1.53605	0.678072	-0.321928	-1.73697	-3.32193	-3.32193	0	CUUGUACAAA			-0.099	8	209.947	9.31214
YHR081W	LRP1	Nuclear exosome-associated nucleic acid binding protein; involved in RNA processing, surveillance, degradation, tethering, and export; forms a stable heterodimer with Rrp6p and regulates its exonucleolytic activity; rapidly degraded by the proteasome in the absence of Rrp6p; homolog of mammalian nuclear matrix protein C1D involved in regulation of DNA repair and recombination	IV	2.1375	1.37851	1.37851	1.37851	-1.73697	0	0	0	UAUGUGUAUA			0.2	6	29.4944	1.30822
YBR252W	DUT1	deoxyuridine triphosphate diphosphatase (dUTPase); catalyzes hydrolysis of dUTP to dUMP and PPi, thereby preventing incorporation of uracil into DNA during replication; critical for the maintenance of genetic stability; also has diphosphatase activity on deoxyinosine triphosphate	IV	2.1375	1.67807	1.1375	0.378512	-2.32193	-2.32193	-3.32193	-3.32193	AGUGUAUAUA	I	II	NA	6	143.591	6.36892
YNL155W	CUZ1	Protein with a role in the ubiquitin-proteasome pathway; interacts with ubiquitinated protein, Cdc48p and the proteasomal regulatory particle; may protect cells from trivalent metalloid induced proteotoxicity; contains a PACE promoter element and is co-regulated with proteasome subunit genes; AN1-type zinc finger protein, with DHHC and ubiquitin-like domains (UBL); ortholog of ZFAND1, a human gen…	IV	2.74416	1.88752	1	-2.32193	-3.32193	-3.32193	-3.32193	0	ACUAUAAAUA			0.191	5	82.8045	3.67276
YGL123W	RPS2	Protein component of the small (40S) subunit; essential for control of translational accuracy; phosphorylation by C-terminal domain kinase I (CTDK-I) enhances translational accuracy; methylated on one or more arginine residues by Hmt1p; homologous to mammalian ribosomal protein S2 and bacterial S5	IV	1.96347	1.20163	0.378512	0.137504	-0.514573	-2.32193	0	0	UUUGUACACU	III	III	NA	7	4878.04	216.364
YOR019W	0	Protein of unknown function; may interact with ribosomes, based on co-purification experiments; YOR019W has a paralog, JIP4, that arose from the whole genome duplication	IV	1.72247	0.584963	0.485427	-0.514573	-1	-3.32193	-3.32193	0	UAUGUAUAUA			-0.12	5	3.09181	0.137136
YOR334W	MRS2	Mitochondrial inner membrane Mg(2+) channel; required for maintenance of intramitochondrial Mg(2+) concentrations at the correct level to support splicing of group II introns; similar to bacterial CorA	IV	2.848	2.26303	1.76554	0.584963	-1.73697	-3.32193	0	0	CCUGUAUAUA			-0.39	14	14.906	0.661152
YGR235C	MIC26	Component of the MICOS complex; MICOS (formerly MINOS or MitOS) is a mitochondrial inner membrane complex that extends into the intermembrane space and has a role in the maintenance of crista junctions, inner membrane architecture, and formation of contact sites to the outer membrane; Mic26p is a non-essential component of the complex	IV	2.53605	1.48543	1	0.263034	0	0	0	0	CUUAUAAAUA		III	-0.117	6	53.478	2.372
YOR382W	FIT2	Mannoprotein that is incorporated into the cell wall; incorporated via a glycosylphosphatidylinositol (GPI) anchor; involved in the retention of siderophore-iron in the cell wall	IV	1.37851	0.847997	-0.321928	-0.736966	-2.32193	-2.32193	0	0	AUCGUGUAUA			NA	0	88.2155	3.91277
YDL157C	0	Putative protein of unknown function; the authentic, non-tagged protein is detected in highly purified mitochondria in high-throughput studies	IV	2	1.48543	0.584963	-1.73697	0	0	0	0	UCUGUACAUA		IV	-0.124	9	137.018	6.07739
YBR025C	OLA1	P-loop ATPase with similarity to human OLA1 and bacterial YchF; identified as specifically interacting with the proteasome; null mutant displays increased translation rate and increased readthrough of premature stop codons; protein abundance increases in response to hydrogen peroxide and to DNA replication stress	IV	2.96347	2.67807	2	1.32193	-1.73697	-3.32193	-3.32193	-3.32193	UGUGUAUGUA		III	NA	10	799.458	35.4597
YKL182W	FAS1	Beta subunit of fatty acid synthetase; complex catalyzes the synthesis of long-chain saturated fatty acids; contains acetyltransacylase, dehydratase, enoyl reductase, malonyl transacylase, and palmitoyl transacylase activities	IV	2.16993	0.263034	-1	-1.73697	-3.32193	0	0	0	AUUAUAAAUA	II	IV	NA	8	698.947	31.0016
YKR056W	TRM2	tRNA methyltransferase; 5-methylates the uridine residue at position 54 of tRNAs and may also have a role in tRNA stabilization or maturation; endo-exonuclease with a role in DNA repair	IV	2.58496	2.10434	1	0.263034	-3.32193	0	0	0	CCUGUACUUU	III	I	0.04	6	76.813	3.40702
YGR102C	GTF1	Subunit of the trimeric GatFAB AmidoTransferase(AdT) complex; involved in the formation of Q-tRNAQ; transposon insertion mutant is salt sensitive and null mutant has growth defects; non-tagged protein is detected in purified mitochondria	IV	1.37851	0.925999	-1	-1.32193	-2.32193	-2.32193	0	0	CUUGUACAUG			0.112	9	22.801	1.01133
YBR084C-A	RPL19A	Ribosomal 60S subunit protein L19A; rpl19a and rpl19b single null mutations result in slow growth, while the double null mutation is lethal; homologous to mammalian ribosomal protein L19, no bacterial homolog; RPL19A has a paralog, RPL19B, that arose from the whole genome duplication	IV	1.32193	0.847997	0.378512	0.137504	-1.32193	-3.32193	0	0	UAUGCACAUA		II	NA	2	1318.39	58.4767
YHR137W	ARO9	Aromatic aminotransferase II; catalyzes the first step of tryptophan, phenylalanine, and tyrosine catabolism	IV	2.32193	1.76554	0	-0.514573	-0.514573	-3.32193	-3.32193	0	UUUGUAUAAA	III	III	0.169	3	27.4898	1.2193
YKL006C-A	SFT1	Intra-Golgi v-SNARE; required for transport of proteins between an early and a later Golgi compartment	IV	2.26303	1.48543	0.847997	0	-1.73697	-3.32193	0	0	AAUGUACAUA	IV		-0.169	7	33.647	1.4924
YOL061W	PRS5	5-phospho-ribosyl-1(alpha)-pyrophosphate synthetase; synthesizes PRPP, which is required for nucleotide, histidine, and tryptophan biosynthesis; one of five related enzymes, which are active as heteromultimeric complexes; forms cytoplasmic foci upon DNA replication stress	IV	2.8679	2.40599	0.925999	-1.73697	0	0	0	0	UAUGUGUAUU			0.092	12	146.715	6.50749
YLR110C	CCW12	Cell wall mannoprotein; plays a role in maintenance of newly synthesized areas of cell wall; localizes to periphery of small buds, septum region of larger buds, and shmoo tip; CCW12 has a paralog, YDR134C, that arose from the whole genome duplication	IV	2.72247	2.48543	2.07039	1	-2.32193	-2.32193	0	0	UUUAUACAUU			NA	4	10755.5	477.056
YMR146C	TIF34	eIF3i subunit of the eukaryotic translation initiation factor 3 (eIF3); subunit of the core complex of eIF3; essential for translation; stimulates rate of ribosomal scanning during translation reinitiation	IV	2	0.925999	0	-0.514573	-1.32193	-3.32193	-3.32193	-3.32193	CGUAUAUAUA	I		NA	4	440.904	19.5562
YOL147C	PEX11	Peroxisomal protein required for medium-chain fatty acid oxidation; also required for peroxisome proliferation, possibly by inducing membrane curvature; localization regulated by phosphorylation; transcription regulated by Adr1p and Pip2p-Oaf1p	IV	3.45943	3.12101	2.45943	1.37851	-3.32193	-3.32193	-3.32193	0	UAUGUAUAUG	IV	IV	0.081	10	30.0382	1.33234
YGR232W	NAS6	Assembly chaperone for the 19S proteasome regulatory particle base; proteasome-interacting protein involved in the assembly of the base subcomplex of the 19S proteasomal regulatory particle (RP); ortholog of human oncoprotein gankyrin, which interacts with the Rb tumor suppressor and CDK4/6	IV	2.3505	1.43296	0.485427	0.378512	-2.32193	-3.32193	0	0	ACUUUACAUA			-0.219	2	62.8234	2.78651
YMR033W	ARP9	Component of both the SWI/SNF and RSC chromatin remodeling complexes; actin-related protein involved in transcriptional regulation	IV	2.48543	1.76554	1.1375	-0.152003	-0.152003	-3.32193	0	0	CGUGUGAAUA	II	II	0.232	7	60.7212	2.69327
YJR096W	0	Xylose and arabinose reductase; member of the aldo-keto reductase (AKR) family; GFP-fusion protein is induced in response to the DNA-damaging agent MMS	IV	2.26303	0.678072	0.485427	-0.152003	-0.152003	-3.32193	0	0	AACGUAUAUA			0.196	4	25.3599	1.12483
YFL045C	SEC53	Phosphomannomutase; involved in synthesis of GDP-mannose and dolichol-phosphate-mannose; required for folding and glycosylation of secretory proteins in the ER lumen	IV	1.32193	1	0.378512	-1	-1	-1	-1.73697	-2.32193	UAUAUAAAUA	III	I	NA	8	788.453	34.9716
YPL210C	SRP72	Core component of the signal recognition particle (SRP); the SRP is a ribonucleoprotein (RNP) complex that functions in targeting nascent secretory proteins to the endoplasmic reticulum (ER) membrane	IV	1.80736	1.58496	0.137504	-1.32193	-3.32193	0	0	0	AUUGUAUAUG	II	II	0.162	8	101.965	4.52264
YBR207W	FTH1	Putative high affinity iron transporter; involved in transport of intravacuolar stores of iron; forms complex with Fet5p; expression is regulated by iron; proposed to play indirect role in endocytosis; protein abundance increases in response to DNA replication stress	IV	1.37851	1.26303	-2.32193	0	0	0	0	0	UAUGUACAUA			0.188	10	47.681	2.11488
YIR037W	HYR1	Thiol peroxidase; functions as a hydroperoxide receptor to sense intracellular hydroperoxide levels and transduce a redox signal to the Yap1p transcription factor; HYR1 has a paralog, GPX1, that arose from the whole genome duplication	IV	2.37851	2.29278	1.63227	-0.152003	-2.32193	-3.32193	0	0	CGUAUACAUA			0.077	7	232.197	10.299
YJR140C	HIR3	Subunit of the HIR complex; a nucleosome assembly complex involved in regulation of histone gene transcription; involved in position-dependent gene silencing and nucleosome reassembly; ortholog of human CABIN1 protein	IV	2.07039	0.765535	0.263034	-0.514573	-1.32193	-2.32193	0	0	UAUGUAAAUA	III		-0.128	8	26.5857	1.1792
YBL018C	POP8	Subunit of both RNase MRP and nuclear RNase P; RNase MRP cleaves pre-rRNA, while nuclear RNase P cleaves tRNA precursors to generate mature 5' ends and facilitates turnover of nuclear RNAs; relocalizes to the cytosol in response to hypoxia	IV	2.53605	1.80736	1.67807	0	-2.32193	0	0	0	CUUGCAAAUC			0.157	4	66.6668	2.95698
YFL034C-A	RPL22B	Ribosomal 60S subunit protein L22B; homologous to mammalian ribosomal protein L22, no bacterial homolog; RPL22B has a paralog, RPL22A, that arose from the whole genome duplication	IV	2.23266	1.80736	0.678072	-0.736966	0	0	0	0	CAUGUAUAUU	III	II	NA	7	129.169	5.72925
YNR045W	PET494	Mitochondrial translational activator specific for the COX3 mRNA; acts together with Pet54p and Pet122p; located in the mitochondrial inner membrane	IV	2.37851	1	0.925999	0	-1.73697	-1.73697	-1.73697	0	CAUGUAAAUA			-0.273	5	11.6101	0.514961
YAL035W	FUN12	Translation initiation factor eIF5B; GTPase that promotes Met-tRNAiMet binding to ribosomes and ribosomal subunit joining; promotes GTP-dependent maturation of 18S rRNA by Nob1p; protein abundance increases in response to DNA replication stress; homolog of bacterial IF2	IV	2.88753	1.848	-1.73697	-3.32193	-3.32193	0	0	0	AUUGUAUAUA	I	III	NA	9	302.965	13.4379
YNL241C	ZWF1	Glucose-6-phosphate dehydrogenase (G6PD); catalyzes the first step of the pentose phosphate pathway; involved in adapting to oxidative stress; homolog of the human G6PD which is deficient in patients with hemolytic anemia; protein abundance increases in response to DNA replication stress	IV	1.96347	1.20163	1.1375	0.137504	-1.73697	0	0	0	UGUGUAAAUA			-0.196	7	129.96	5.76435
YOR131C	0	Putative haloacid dehalogenase-like hydrolase; non-essential gene; overexpression causes a cell cycle delay or arrest; protein abundance increases in response to DNA replication stress	IV	2.03562	1	0.584963	-1.73697	-1.73697	0	0	0	UAUGUACAUA			0.432	2	41.1109	1.82346
YNL010W	0	Putative protein of unknown function; similar to phosphoserine phosphatases; green fluorescent protein (GFP)-fusion protein localizes to the cytoplasm and nucleus; homozygous diploid mutant shows an increase in glycogen accumulation	IV	4.36457	2.8679	1.67807	-0.321928	-1.73697	-3.32193	0	0	UAUGCAUAUA		III	NA	6	406.582	18.0338
YJL190C	RPS22A	Protein component of the small (40S) ribosomal subunit; homologous to mammalian ribosomal protein S15A and bacterial S8; RPS22A has a paralog, RPS22B, that arose from the whole genome duplication	IV	1.67807	0.765535	-0.321928	-0.736966	-2.32193	0	0	0	UAUGCAAAUG		IV	NA	9	3780.26	167.672
YLR367W	RPS22B	Protein component of the small (40S) ribosomal subunit; homologous to mammalian ribosomal protein S15A and bacterial S8; RPS22B has a paralog, RPS22A, that arose from the whole genome duplication	IV	2.29278	1.80736	0.847997	-0.152003	-0.321928	-2.32193	0	0	UACAUAUAUA			NA	9	189.099	8.38742
