# Supplementary material
Source: HighWire-hosted journal article supplement (doi:10.1101/rna.062687.117)
Supplement: Supplemental_Data_5_PUF4-KO5.xlsx [file Supplemental_Data_5_PUF4-KO5.xlsx]

## Sheet: Key
Column header	Description
PUF4-koPUF5 target	Systematic name of Puf4p;KOpuf5 target gene
Name	Name of Puf4p;KOpuf5 target
Description	Gene description
Class	Puf4p;KOpuf5 target class for this gene
Mean TRPM U1 (log2)	Mean number of TRPM detected with at least 1 U in the Utag
Mean TRPM U2 (log2)	Mean number of TRPM detected with at least 2 U's in the Utag
Mean TRPM U3 (log2)	Mean number of TRPM detected with at least 3 U's in the Utag
Mean TRPM U4 (log2)	Mean number of TRPM detected with at least 4 U's in the Utag
Mean TRPM U5 (log2)	Mean number of TRPM detected with at least 5 U's in the Utag
Mean TRPM U6 (log2)	Mean number of TRPM detected with at least 6 U's in the Utag
Mean TRPM U7 (log2)	Mean number of TRPM detected with at least 7 U's in the Utag
Mean TRPM U8 (log2)	Mean number of TRPM detected with at least 8 U's in the Utag
Puf3p Target Class	Class of this target in the Puf3p data set
Puf4p Target class	Class of this target in the Puf4p data set
Puf5p Target class	Class of this target in the Puf5p data set
RNAseq mean FPKM	Mean FPKM value from RNAseq data of BY4742 yeast strain, mined from Lapointe et al. 2015
Estimated mRNA molecules per cell	Number of estimated mRNA molecules per cell, based off RNAseq (FPKM) and an estimated 36,000 total mRNAs per cell

## Sheet: Puf4p;KOpuf5 Targets
PUF4-koPUF5 target	Name	Description	Class	Mean TRPM U1 (log2)	Mean TRPM U2 (log2)	Mean TRPM U3 (log2)	Mean TRPM U4 (log2)	Mean TRPM U5 (log2)	Mean TRPM U6 (log2)	Mean TRPM U7 (log2)	Mean TRPM U8 (log2)	Puf3p Target Class	Puf4p Target class	Puf5p Target class	RNAseq mean FPKM	Estimated mRNA molecules per cell
YKL172W	EBP2	Required for 25S rRNA maturation and 60S ribosomal subunit assembly; localizes to the nucleolus and in foci along nuclear periphery; constituent of 66S pre-ribosomal particles; cooperates with Rrs1p and Mps3p to mediate telomere clustering by binding Sir4p, but is not involved in telomere tethering	I	11.0713	10.6701	10.201	9.58606	8.99751	8.24141	7.18801	5.79029		I	III	157.901	7.00365
YNL182C	IPI3	Component of the Rix1 complex and pre-replicative complexes (pre-RCs); required for processing of ITS2 sequences from 35S pre-rRNA; component of the pre-60S ribosomal particle with the dynein-related AAA-type ATPase Mdn1p; required for pre-RC formation and maintenance during DNA replication licensing; highly conserved protein which contains several WD40 motifs; IPI3 is an essential gene; other me…	I	10.6638	10.0554	9.46812	8.64685	7.76385	6.64676	4.89209	3.24703		I	III	127.367	5.64931
YCR075W-A		Putative protein of unknown function; identified by homology to Ashbya gossypii; YCR075W-A has a paralog, YNR034W-A, that arose from the whole genome duplication	I	10.0514	9.65492	9.26583	8.87547	8.34551	7.44633	6.08048	4.31862		I		51.7693	2.29621
YLR175W	CBF5	Pseudouridine synthase catalytic subunit of box H/ACA snoRNPs; acts on large and small rRNAs, on snRNA U2, and on some mRNAs; mutations in human ortholog dyskerin cause the disorder dyskeratosis congenita; small nucleolar ribonucleoprotein particles are also known as snoRNPs	I	9.19447	8.89554	8.56105	8.14786	7.60739	6.90877	5.9302	4.70505	IV	I	II	373.744	16.5773
YNL031C	HHT2	Histone H3; core histone protein required for chromatin assembly, part of heterochromatin-mediated telomeric and HM silencing; one of two identical histone H3 proteins (see HHT1); regulated by acetylation, methylation, and phosphorylation; H3K14 acetylation plays an important role in the unfolding of strongly positioned nucleosomes during repair of UV damage	I	9.85598	9.3089	8.61409	7.73828	6.79802	5.40659	3.72167	2.06979	IV	I	I	1010.32	44.8124
YBR121C	GRS1	Cytoplasmic and mitochondrial glycyl-tRNA synthase; ligates glycine to the cognate anticodon-bearing tRNA; transcription termination factor that may interact with the 3'-end of pre-mRNA to promote 3'-end formation; GRS1 has a paralog, GRS2, that arose from the whole genome duplication; human homolog GARS implicated in Charcot-Marie-Tooth disease, can complement yeast null mutant	I	10.7274	9.99144	9.37145	8.58853	7.80547	6.5685	4.91378	3.43856	II	I	II	560.114	24.8437
YML123C	PHO84	High-affinity inorganic phosphate (Pi) transporter; also low-affinity manganese transporter; regulated by Pho4p and Spt7p; mutation confers resistance to arsenate; exit from the ER during maturation requires Pho86p; cells overexpressing Pho84p accumulate heavy metals but do not develop symptoms of metal toxicity	I	10.4355	9.82931	9.2488	8.57045	7.83981	6.84843	5.4791	4.02224		I	I	984.422	43.6637
YDL208W	NHP2	Protein related to mammalian high mobility group (HMG) proteins; nuclear protein; essential for function of H/ACA-type snoRNPs, which are involved in 18S rRNA processing	I	11.4635	11.0269	10.5887	10.0095	9.2996	8.31275	7.10655	5.74683	III	I		572.26	25.3824
YGL099W	LSG1	Putative GTPase involved in 60S ribosomal subunit biogenesis; required for the release of Nmd3p from 60S subunits in the cytoplasm	I	9.86805	9.25904	8.65105	7.85102	6.99346	5.87727	4.48287	3.07364		I		116.239	5.15574
YNL067W	RPL9B	Ribosomal 60S subunit protein L9B; homologous to mammalian ribosomal protein L9 and bacterial L6; RPL9B has a paralog, RPL9A, that arose from a single-locus duplication	I	11.7023	11.3191	10.8285	10.1158	9.41567	8.45431	7.23863	5.89644		I	III	728.277	32.3025
YBR034C	HMT1	Nuclear SAM-dependent mono- and asymmetric methyltransferase; modifies hnRNPs, including Npl3p and Hrp1p, affecting their activity and nuclear export; methylates U1 snRNP protein Snp1p, ribosomal protein Rps2p, and histones H3 and H4; interacts genetically with genes encoding components of Rpd3(L) and this interaction is important for Rpd3 recruitment to the subtelomeric region.	I	10.2219	9.67013	9.01042	8.34353	7.74894	6.77242	5.53981	3.92312	III	I	I	287.154	12.7366
YHR089C	GAR1	Protein component of the H/ACA snoRNP pseudouridylase complex; involved in the modification and cleavage of the 18S pre-rRNA	I	9.45004	9.15453	8.81821	8.30649	7.62913	6.65805	5.43007	4.05628		I	IV	246.187	10.9196
YDR339C	FCF1	Putative PINc domain nuclease; required for early cleavages of 35S pre-rRNA and maturation of 18S rRNA; component of the SSU (small subunit) processome involved in 40S ribosomal subunit biogenesis; copurifies with Faf1p	I	9.40586	8.92683	8.49362	7.92534	7.25965	6.35804	5.05734	3.36172		I		140.926	6.25074
YDL031W	DBP10	Putative ATP-dependent RNA helicase of the DEAD-box protein family; constituent of 66S pre-ribosomal particles; essential protein involved in ribosome biogenesis	I	10.9029	10.58	10.2148	9.79166	9.2644	8.55933	7.61511	6.35219		I	IV	109.935	4.87611
YBR010W	HHT1	Histone H3; core histone protein required for chromatin assembly, part of heterochromatin-mediated telomeric and HM silencing; one of two identical histone H3 proteins (see HHT2); regulated by acetylation, methylation, and phosphorylation; H3K14 acetylation plays an important role in the unfolding of strongly positioned nucleosomes during repair of UV damage	I	9.80394	9.5243	9.25725	8.87388	8.41344	7.74361	6.83587	5.63773		I	I	1023.51	45.3975
YOL059W	GPD2	NAD-dependent glycerol 3-phosphate dehydrogenase; expression is controlled by an oxygen-independent signaling pathway required to regulate metabolism under anoxic conditions; located in cytosol and mitochondria; constitutively active but is inactivated via phosphorylation by energy-stress responsive kinase SNF1; GPD2 has a paralog, GPD1, that arose from the whole genome duplication	I	10.1939	9.85025	9.5636	9.21049	8.76563	8.18192	7.21897	6.01412	III	I	II	123.067	5.45859
YML093W	UTP14	Subunit of U3-containing Small Subunit (SSU) processome complex; involved in production of 18S rRNA and assembly of small ribosomal subunit	I	9.32502	8.94971	8.60772	8.18892	7.75854	7.11497	6.29412	4.95277		I	I	85.7514	3.80348
YPL043W	NOP4	Nucleolar protein; essential for processing and maturation of 27S pre-rRNA and large ribosomal subunit biogenesis; constituent of 66S pre-ribosomal particles; contains four RNA recognition motifs (RRMs)	I	10.2948	9.86353	9.4004	8.86944	8.2621	7.32366	5.8346	4.31818		I	III	112.247	4.97866
YDR224C	HTB1	Histone H2B; core histone protein required for chromatin assembly and chromosome function; nearly identical to HTB2; Rad6p-Bre1p-Lge1p mediated ubiquitination regulates reassembly after DNA replication, transcriptional activation, meiotic DSB formation and H3 methylation	I	9.65504	9.362	9.09026	8.75659	8.36402	7.84512	7.10258	6.09649		I	I	1196.48	53.0695
YNL002C	RLP7	Nucleolar protein similar to large ribosomal subunit L7 proteins; constituent of 66S pre-ribosomal particles; plays an essential role in processing of precursors to the large ribosomal subunit RNAs; binds junction of ITS2 and ITS2-proximal stem between the 3' end of 5.8S rRNA and the 5' end of 25S rRNA	I	9.79128	9.3337	8.83525	8.30014	7.60638	6.72228	5.32011	3.95504		I	II	232.56	10.3151
YNL132W	KRE33	Protein required for biogenesis of the small ribosomal subunit; heterozygous mutant shows haploinsufficiency in K1 killer toxin resistance; essential gene; NAT10, the human homolog, implicated in several types of cancer and premature aging.	I	9.57178	8.90645	8.28811	7.57803	6.8233	5.61236	3.88424	2.19732		I	III	165.473	7.33951
YDR361C	BCP1	Essential protein involved in nuclear export of Mss4p; Mss4p is a lipid kinase that generates phosphatidylinositol 4,5-biphosphate and plays a role in actin cytoskeleton organization and vesicular transport	I	9.99303	9.5479	9.03126	8.37882	7.65341	6.75805	5.54877	4.07285		I	I	109.496	4.85667
YKR024C	DBP7	Putative ATP-dependent RNA helicase of the DEAD-box family; involved in ribosomal biogenesis; required at post-transcriptional step for efficient retrotransposition; essential for growth under anaerobic conditions	I	9.12725	8.70688	8.34241	7.90683	7.26616	6.63112	5.67258	4.37448		I		56.0638	2.48669
YDR496C	PUF6	Pumilio-homology domain protein; binds the 3' UTR of ASH1 mRNA and represses its translation, resulting in proper asymmetric localization of ASH1 mRNA; required at post-transcriptional step for efficient retrotransposition; absence results in decreased Ty1 Gag:GFP protein levels; co-sediments with the 60S ribosomal subunit and is required for its biogenesis	I	12.5829	12.2244	11.8319	11.3523	10.8024	10.058	8.97826	7.41227		I	II	226.029	10.0254
YBR143C	SUP45	Polypeptide release factor (eRF1) in translation termination; mutant form acts as a recessive omnipotent suppressor; methylated by Mtq2p-Trm112p in ternary complex eRF1-eRF3-GTP; mutation of methylation site confers resistance to zymocin; has a role in cytokinesis through interaction with Mlc1p	I	10.5404	9.98753	9.30432	8.47808	7.61652	6.61979	5.472	4.19983		I	III	435.249	19.3053
YJL122W	ALB1	Shuttling pre-60S factor; involved in the biogenesis of ribosomal large subunit; interacts directly with Arx1p; responsible for Tif6p recycling defects in absence of Rei1p	I	11.1305	10.6924	10.229	9.6462	8.9337	8.03611	6.83636	5.35429	III	I	II	233.274	10.3468
YBR252W	DUT1	deoxyuridine triphosphate diphosphatase (dUTPase); catalyzes hydrolysis of dUTP to dUMP and PPi, thereby preventing incorporation of uracil into DNA during replication; critical for the maintenance of genetic stability; also has diphosphatase activity on deoxyinosine triphosphate	I	11.1056	10.5955	10.1004	9.49189	8.6081	7.45432	6.24737	4.38477	IV	I	II	143.591	6.36892
YDR060W	MAK21	Constituent of 66S pre-ribosomal particles; required for large (60S) ribosomal subunit biogenesis; acts as part of a Mak21p-Noc2p-Rrp5p module that associates with nascent pre-rRNA during transcription and has a role in bigenesis of the large ribosomal subunit; involved in nuclear export of pre-ribosomes; required for maintenance of dsRNA virus; homolog of human CAATT-binding protein	I	10.4749	9.95765	9.39759	8.66806	7.89366	6.85145	5.19667	3.3345	IV	I	II	183.336	8.13179
YDL014W	NOP1	Histone glutamine methyltransferase, modifies H2A at Q105 in nucleolus; component of the small subunit processome complex, which is required for processing of pre-18S rRNA; ortholog of mammalian fibrillarin	I	9.68907	9.05756	8.35835	7.56446	6.58274	5.27179	3.83961	2.25551		I	II	628.804	27.8904
YMR049C	ERB1	Constituent of 66S pre-ribosomal particles; forms a complex with Nop7p and Ytm1p that is required for maturation of the large ribosomal subunit; required for maturation of the 25S and 5.8S ribosomal RNAs; homologous to mammalian Bop1	I	10.3146	9.90925	9.58327	9.12438	8.54804	7.67657	6.60269	5.09969		I	II	153.02	6.78716
YLR009W	RLP24	Essential protein required for ribosomal large subunit biogenesis; associated with pre-60S ribosomal subunits; stimulates the ATPase activity of Afg2p, which is required for release of Rlp24p from the pre-60S particle; has similarity to Rpl24Ap and Rpl24Bp	I	9.76311	9.09543	8.43504	7.64718	6.7796	5.616	3.80746	2.60892	IV	I	II	336.54	14.9271
YGR159C	NSR1	Nucleolar protein that binds nuclear localization sequences; required for pre-rRNA processing and ribosome biogenesis	I	12.0283	11.4243	10.587	9.56053	8.55682	7.44038	6.03286	4.33922		I	III	868.472	38.5208
YDR101C	ARX1	Nuclear export factor for the ribosomal pre-60S subunit; shuttling factor which directly binds FG rich nucleoporins and facilities translocation through the nuclear pore complex; interacts directly with Alb1p; responsible for Tif6p recycling defects in the absence of Rei1; associated with the ribosomal export complex	I	8.27573	7.91948	7.59667	7.19222	6.78901	6.13617	5.27112	4.10354		II	III	237.791	10.5471
YGL097W	SRM1	Nucleotide exchange factor for Gsp1p; localizes to the nucleus, required for nucleocytoplasmic trafficking of macromolecules; suppressor of the pheromone response pathway; potentially phosphorylated by Cdc28p	I	9.36558	8.91144	8.50312	7.95163	7.35729	6.5874	5.5307	3.899		I	I	106.002	4.70169
YLR186W	EMG1	Methyltransferase for rRNA; catalyzes methylation of the pseudouridine residue 1191 of 18S rRNA; member of the SPOUT methyltransferase family; required for maturation of 18S rRNA and for 40S ribosomal subunit production independently of methyltransferase activity; forms homodimers; human ortholog is mutated in Bowen-Conradi syndrome, and the equivalent mutation in yeast affects Emg1p dimerization…	I	10.2538	9.7596	9.21598	8.43628	7.56741	6.36405	5.04308	3.34226		I	II	174.309	7.73141
YNL301C	RPL18B	Ribosomal 60S subunit protein L18B; homologous to mammalian ribosomal protein L18, no bacterial homolog; RPL18B has a paralog, RPL18A, that arose from the whole genome duplication	I	12.31	11.8547	11.4275	10.898	10.2824	9.35337	8.08556	6.51243	III	I	I	163.203	7.23879
YOL077C	BRX1	Nucleolar protein; constituent of 66S pre-ribosomal particles; depletion leads to defects in rRNA processing and a block in the assembly of large ribosomal subunits; possesses a sigma(70)-like RNA-binding motif	I	8.80357	8.36447	7.8805	7.32137	6.69724	5.80907	4.65325	3.02423		I	IV	314.827	13.964
YML022W	APT1	Adenine phosphoribosyltransferase; catalyzes the formation of AMP from adenine and 5-phosphoribosylpyrophosphate; involved in the salvage pathway of purine nucleotide biosynthesis; APT1 has a paralog, APT2, that arose from the whole genome duplication	I	11.1116	10.6135	10.0769	9.44431	8.70339	7.65877	6.16696	4.59154		I	I	303.576	13.465
YKR081C	RPF2	Essential protein involved in rRNA maturation and ribosomal assembly; involved in the processing of pre-rRNA and the assembly of the 60S ribosomal subunit; interacts with ribosomal protein L11; localizes predominantly to the nucleolus; constituent of 66S pre-ribosomal particles	I	11.5187	11.0615	10.5953	9.98614	9.26973	8.25585	6.86535	5.07523		I	II	191.533	8.49536
YNL110C	NOP15	Constituent of 66S pre-ribosomal particles; involved in 60S ribosomal subunit biogenesis; localizes to both nucleolus and cytoplasm	I	10.7193	10.0912	9.61039	8.93424	8.12978	7.14465	5.64729	4.28528		I	I	168.558	7.47633
YBR189W	RPS9B	Protein component of the small (40S) ribosomal subunit; homologous to mammalian ribosomal protein S9 and bacterial S4; RPS9B has a paralog, RPS9A, that arose from the whole genome duplication	I	11.645	10.9177	10.261	9.6172	8.91111	7.9648	6.68819	5.22519		I	II	2283.2	101.271
YAL059W	ECM1	Pre-ribosomal factor involved in 60S ribosomal protein subunit export; associates with the pre-60S particle; shuttles between the nucleus and cytoplasm	I	8.47761	8.23243	7.86705	7.41514	6.86049	6.37393	5.51488	4.30639		I		131.502	5.83271
YNL113W	RPC19	RNA polymerase subunit AC19; common to RNA polymerases I and III	I	12.2677	11.8981	11.5581	11.1015	10.4307	9.44784	7.94365	6.06479		I	I	258.89	11.483
YLR355C	ILV5	Acetohydroxyacid reductoisomerase and mtDNA binding protein; involved in branched-chain amino acid biosynthesis and maintenance of wild-type mitochondrial DNA; found in mitochondrial nucleoids	I	11.7137	11.6011	11.4979	11.2873	10.8987	10.6026	10.2475	9.62576		I	IV	2361.37	104.738
YAR007C	RFA1	Subunit of heterotrimeric Replication Protein A (RPA); RPA is a highly conserved single-stranded DNA binding protein involved in DNA replication, repair, and recombination; RPA protects against inappropriate telomere recombination, and upon telomere uncapping, prevents cell proliferation by a checkpoint-independent pathway; role in DNA catenation/decatenation pathway of chromosome disentangling; …	I	9.92623	9.32051	8.8028	8.2201	7.43123	6.4279	5.17669	3.46471		I	III	59.4163	2.63539
YLR363W-A		Protein of unknown function; green fluorescent protein (GFP)-fusion protein localizes to the nucleus; relocalizes from nucleus to nucleolus upon DNA replication stress	I	10.9942	10.5802	10.1414	9.6641	9.07641	8.32822	7.29815	5.85948	IV	I	II	83.6767	3.71145
YPR187W	RPO26	RNA polymerase subunit ABC23; common to RNA polymerases I, II, and III; part of central core; similar to bacterial omega subunit	I	9.11959	8.57228	8.0581	7.41908	6.68106	5.48376	4.27188	2.83734	IV	I	II	282.26	12.5195
YHR052W	CIC1	Essential protein that interacts with proteasome components; has a potential role in proteasome substrate specificity; also copurifies with 66S pre-ribosomal particles	I	8.56765	8.18712	7.84624	7.32585	6.718	5.95234	4.87517	3.49327		I		232.305	10.3038
YLR401C	DUS3	Dihydrouridine synthase; member of a widespread family of conserved proteins including Smm1p, Dus1p, and Dus4p; contains a consensus oleate response element (ORE) in its promoter region; forms nuclear foci upon DNA replication stress	I	9.63907	9.06274	8.4923	7.87483	7.12296	6.0311	4.83976	3.09783		I	II	77.7352	3.44792
YOR294W	RRS1	Essential protein that binds ribosomal protein L11; required for nuclear export of the 60S pre-ribosomal subunit during ribosome biogenesis; localizes to the nucleolus and in foci along nuclear periphery; cooperates with Ebp2p and Mps3p to mediate telomere clustering by binding Sir4p, but is not involved in telomere tethering; mouse homolog shows altered expression in Huntington's disease model m…	I	10.9588	10.7579	10.5256	10.2154	9.81814	9.27418	8.53079	7.52045		I	II	277.874	12.325
YDR471W	RPL27B	Ribosomal 60S subunit protein L27B; homologous to mammalian ribosomal protein L27, no bacterial homolog; RPL27B has a paralog, RPL27A, that arose from the whole genome duplication	I	8.08743	7.10223	6.1607	5.09159	3.30293	1.76793	0.628703	-0.318069	III	II	I	738.653	32.7627
YOR272W	YTM1	Constituent of 66S pre-ribosomal particles; forms a complex with Nop7p and Erb1p that is required for maturation of the large ribosomal subunit; has seven C-terminal WD repeats	I	7.84281	7.01308	6.26154	5.28254	4.02104	2.81779	1.16752	0.554841		II	II	154.368	6.84694
YDR399W	HPT1	Dimeric hypoxanthine-guanine phosphoribosyltransferase; catalyzes the transfer of the phosphoribosyl portion of 5-phosphoribosyl-alpha-1-pyrophosphate to a purine base (either guanine or hypoxanthine) to form pyrophosphate and a purine nucleotide (either guanosine monophosphate or inosine monophosphate); mutations in the human homolog HPRT1 can cause Lesch-Nyhan syndrome and Kelley-Seegmiller syn…	I	7.61096	7.0759	6.48526	5.80239	4.93614	3.58627	1.28811	-0.286352		II	III	337.196	14.9562
YKL182W	FAS1	Beta subunit of fatty acid synthetase; complex catalyzes the synthesis of long-chain saturated fatty acids; contains acetyltransacylase, dehydratase, enoyl reductase, malonyl transacylase, and palmitoyl transacylase activities	I	8.713	7.64243	6.61466	5.3728	4.05998	2.78218	1.81053	0.894889	IV	II	IV	698.947	31.0016
YBR267W	REI1	Cytoplasmic pre-60S factor; required for the correct recycling of shuttling factors Alb1, Arx1 and Tif6 at the end of the ribosomal large subunit biogenesis; involved in bud growth in the mitotic signaling network	I	8.47703	8.0624	7.68892	7.13952	6.40699	5.50585	4.50806	2.67819		I		97.6065	4.32931
YOR020C	HSP10	Mitochondrial matrix co-chaperonin; inhibits the ATPase activity of Hsp60p, a mitochondrial chaperonin; involved in protein folding and sorting in the mitochondria; 10 kD heat shock protein with similarity to E. coli groES	I	7.20719	6.68656	6.18047	5.41933	4.73832	4.15969	3.19039	1.76689	I			796.579	35.332
YOR369C	RPS12	Protein component of the small (40S) ribosomal subunit; homologous to mammalian ribosomal protein S12, no bacterial homolog	I	7.49623	6.46359	5.60033	4.71578	3.6687	2.40553	1.22215	-0.07864			II	6117.54	271.342
YGR061C	ADE6	Formylglycinamidine-ribonucleotide (FGAM)-synthetase; catalyzes a step in the 'de novo' purine nucleotide biosynthetic pathway	I	7.49136	6.59422	6.05945	5.35776	4.35863	3.0856	0.556046	-0.885995		II	IV	241.986	10.7332
YNL308C	KRI1	Essential nucleolar protein required for 40S ribosome biogenesis; associate with snR30; physically and functionally interacts with Krr1p	I	7.77974	7.04643	6.40338	5.63976	4.80971	3.52128	1.31795	-0.71607		I		40.3479	1.78962
YMR229C	RRP5	RNA binding protein involved in synthesis of both 18S and 5.8S rRNAs; component of both the ribosomal small subunit (SSU) processosome and the 90S preribosome; acts as part of a Mak21p-Noc2p-Rrp5p module that associates with nascent pre-rRNA during transcription and has a role in bigenesis of the large ribosomal subunit; has binding preference for single stranded tracts of U's; relocalizes from n…	I	9.24277	8.55012	7.86671	7.1016	6.19722	4.71433	3.47104	1.70837		I	III	303.005	13.4397
YER006W	NUG1	GTPase that associates with nuclear 60S pre-ribosomes; required for export of 60S ribosomal subunits from the nucleus	I	8.43963	7.77731	7.16954	6.13197	5.16994	3.75616	2.24722	-0.093231		I		246.63	10.9392
YLR222C	UTP13	Nucleolar protein; component of the small subunit (SSU) processome containing the U3 snoRNA that is involved in processing of pre-18S rRNA	I	7.83742	7.322	6.52858	5.74514	4.4735	3.02695	1.48446	-1.30103		I		129.578	5.74738
YGR271C-A	EFG1	Essential protein required for maturation of 18S rRNA; null mutant is sensitive to hydroxyurea and is delayed in recovering from alpha-factor arrest; green fluorescent protein (GFP)-fusion protein localizes to the nucleolus	I	7.58762	7.00112	6.53206	6.05819	5.41693	4.55791	3.10821	1.52602				88.7591	3.93688
YNL064C	YDJ1	Type I HSP40 co-chaperone; involved in regulation of HSP90 and HSP70 functions; acts as an adaptor that helps Rsp5p recognize cytosolic misfolded proteins for ubiquitylation after heat shock; critical for determining cell size at Start as a function of growth rate; involved in protein translocation across membranes; member of the DnaJ family	I	8.78499	7.91193	6.99764	5.81508	4.83551	3.67792	2.02505	0.369852		II	III	483.939	21.4649
YLR129W	DIP2	Nucleolar protein; specifically associated with the U3 snoRNA, part of the large ribonucleoprotein complex known as the small subunit (SSU) processome, required for 18S rRNA biogenesis, part of the active pre-rRNA processing complex	I	7.33365	6.71077	5.8928	4.92677	4.12419	2.51559	0.157606	-1.05356		II		94.4533	4.18945
YGL062W	PYC1	Pyruvate carboxylase isoform; cytoplasmic enzyme that converts pyruvate to oxaloacetate; differentially regulated than isoform Pyc2p; mutations in the human homolog are associated with lactic acidosis; PYC1 has a paralog, PYC2, that arose from the whole genome duplication	I	7.6132	6.77785	6.1017	5.33334	4.25674	3.22505	1.81684	0.055881		II		90.3625	4.008
YBL024W	NCL1	S-adenosyl-L-methionine-dependent tRNA: m5C-methyltransferase; methylates cytosine to m5C at several positions in tRNAs and intron-containing pre-tRNAs; increases proportion of tRNALeu(CAA) with m5C at wobble position in response to hydrogen peroxide, causing selective translation of mRNA from genes enriched in TTG codon; loss of NCL1 confers hypersensitivity to oxidative stress; similar to Nop2p…	I	6.98469	6.42954	5.82401	5.15513	4.33474	2.78167	1.55197	0.425735		II		197.434	8.75713
YNL111C	CYB5	Cytochrome b5; involved in the sterol and lipid biosynthesis pathways; acts as an electron donor to support sterol C5-6 desaturation	I	6.50231	6.1193	5.72923	5.27839	4.66882	3.63229	2.17323	0.443458		III	IV	175.881	7.80114
YGL078C	DBP3	RNA-Dependent ATPase, member of DExD/H-box family; involved in cleavage of site A3 within the ITS1 spacer during rRNA processing; not essential for growth, but deletion causes severe slow-growth phenotype	I	8.55875	8.10687	7.56975	6.96428	6.36689	5.64377	4.55785	3.11437		I		209.832	9.30703
YDR429C	TIF35	eIF3g subunit of the eukaryotic translation initiation factor 3 (eIF3); subunit of the core complex of eIF3; is essential for translation; stimulates resumption of ribosomal scanning during translation reinitiation	I	7.83594	6.90993	6.09215	5.16829	4.12813	2.38173	0.530173	-2.30103		II		466.888	20.7087
YOR254C	SEC63	Essential subunit of Sec63 complex; with Sec61 complex, Kar2p/BiP and Lhs1p forms a channel competent for SRP-dependent and post-translational SRP-independent protein targeting and import into the ER; other members are Sec62p, Sec66p, and Sec72p	I	10.0629	9.1582	6.50388	3.39351	1.62928	0.984146	0.453532	-0.86403			I	164.546	7.29837
YOR224C	RPB8	RNA polymerase subunit ABC14.5; common to RNA polymerases I, II, and III	I	7.87739	7.21329	6.81241	6.21128	5.37956	4.34885	2.86956	0.920425	IV	II	I	401.885	17.8255
YPL093W	NOG1	Putative GTPase; associates with free 60S ribosomal subunits in the nucleolus and is required for 60S ribosomal subunit biogenesis; constituent of 66S pre-ribosomal particles; member of the ODN family of nucleolar G-proteins	I	6.37776	5.92307	5.5334	5.03945	4.4404	3.75668	3.03617	1.83759		II	IV	407.322	18.0666
YJL158C	CIS3	Mannose-containing glycoprotein constituent of the cell wall; member of the PIR (proteins with internal repeats) family	I	8.84385	7.93581	7.08298	6.16282	5.33134	4.05751	2.71676	1.70524		I	II	640.822	28.4235
YDL213C	NOP6	rRNA-binding protein required for 40S ribosomal subunit biogenesis; contains an RNA recognition motif (RRM); hydrophilin essential to overcome the stress of the desiccation-rehydration process; NOP6 may be a fungal-specific gene as no homologs have been yet identified in higher eukaryotes	I	8.08142	7.44479	6.96191	6.26516	5.36877	4.80283	3.22723	1.19993	IV	I	II	107.817	4.78221
YOR206W	NOC2	Protein involved in ribosome biogenesis; forms a nucleolar complex with Mak21p that binds to 90S and 66S pre-ribosomes; forms a nuclear complex with Noc3p that binds to 66S pre-ribosomes; both complexes mediate intranuclear transport of ribosomal precursors; acts as part of a Mak21p-Noc2p-Rrp5p module that associates with nascent pre-rRNA during transcription and has a role in bigenesis of the la…	I	8.26625	7.71586	7.18134	6.65312	5.85527	4.96092	3.51946	2.27434		II	II	210.106	9.31918
YOR310C	NOP58	Protein involved in producing mature rRNAs and snoRNAs; involved in pre-rRNA processing, 18S rRNA synthesis, and snoRNA synthesis; component of the small subunit processome complex, which is required for processing of pre-18S rRNA	I	6.81644	6.32492	5.79849	5.01684	4.13653	3.05812	1.34178	0.351196		II		293.695	13.0268
YLR435W	TSR2	Protein with a potential role in pre-rRNA processing	I	7.74192	7.14364	6.72937	6.12016	5.33235	3.95481	2.65746	1.1297		II	III	115.56	5.12564
YIL142W	CCT2	Subunit beta of the cytosolic chaperonin Cct ring complex; related to Tcp1p, required for the assembly of actin and tubulins in vivo	I	8.2999	7.32992	6.45479	5.2608	4.38918	2.98756	1.95745	0.415464		III	III	245.426	10.8858
YPL266W	DIM1	Essential 18S rRNA dimethylase (dimethyladenosine transferase); responsible for conserved m6(2)Am6(2)A dimethylation in 3'-terminal loop of 18S rRNA, part of 90S and 40S pre-particles in nucleolus, involved in pre-ribosomal RNA processing; functional homolog of human DIMT1L	I	8.67412	7.81866	7.20485	6.43575	5.47227	4.30637	2.76864	0.588267		II		155.159	6.88201
YNL061W	NOP2	rRNA m5C methyltransferase; methylates cytosine at position 2870 of 25S rRNA while Rcm1p methylates cytosine at position 2278; contains seven beta-strand methyltransferase motif; essential for processing and maturation of 27S pre-rRNA and large ribosomal subunit biogenesis; localized to the nucleolus; constituent of 66S pre-ribosomal particles; homolog of p120/NSUN1, a human gene upregulated in c…	I	6.49695	6.24277	5.87916	5.48351	5.04398	4.56199	3.87924	2.85093		II		213.623	9.47516
YOR361C	PRT1	eIF3b subunit of the eukaryotic translation initiation factor 3 (eIF3); subunit of the core complex of eIF3; essential for translation; part of a subcomplex (Prt1p-Rpg1p-Nip1p) that stimulates binding of mRNA and tRNA(i)Met to ribosomes	I	9.52567	8.68361	7.77443	6.88867	5.56168	4.24296	2.34684	1.10207		II	IV	291.658	12.9364
YJL130C	URA2	Bifunctional carbamoylphosphate synthetase/aspartate transcarbamylase; catalyzes the first two enzymatic steps in the de novo biosynthesis of pyrimidines; both activities are subject to feedback inhibition by UTP	I	7.46547	7.10366	6.59547	6.0211	5.28192	4.47438	3.57441	2.2269		II		293.245	13.0068
YPR133C	SPN1	Protein involved in RNA polymerase II transcription; is constitutively recruited to the CYC1 promoter and is required for recruitment of chromatin remodeling factors for the expression of CYC1 gene; interacts genetically or physically with RNAP II, TBP, TFIIS, and chromatin remodelling factors; central domain highly conserved throughout eukaryotes; mutations confer an Spt- phenotype	I	7.59252	6.97228	6.42118	5.8637	5.19286	3.87701	2.89989	1.1947		II	IV	80.7313	3.58081
YHR201C	PPX1	Exopolyphosphatase; hydrolyzes inorganic polyphosphate (poly P) into Pi residues; located in the cytosol, plasma membrane, and mitochondrial matrix	I	7.07199	6.62019	6.05957	5.4092	4.45388	3.36852	1.90677	0.791824		I		53.2297	2.36099
YDL060W	TSR1	Protein required for processing of 20S pre-rRNA in the cytoplasm; associates with pre-40S ribosomal particles; inhibits the premature association of 60S subunits with assembling 40S subunits in the cytoplasm; similar to Bms1p; relocalizes from nucleus to cytoplasm upon DNA replication stress	I	5.91976	5.57995	5.14806	4.6415	3.94641	3.23944	2.12696	0.867923				122.164	5.41853
YGL103W	RPL28	Ribosomal 60S subunit protein L28; homologous to mammalian ribosomal protein L27A and bacterial L15; may have peptidyl transferase activity; can mutate to cycloheximide resistance	I	7.85285	6.62409	5.55161	4.48608	3.59195	2.47212	1.35588	0.596211	III	II	I	2217.26	98.3457
YPL198W	RPL7B	Ribosomal 60S subunit protein L7B; required for processing of 27SA3 pre-rRNA to 27SB pre-rRNA during assembly of large ribosomal subunit; depletion leads to a turnover of pre-rRNA; contains a conserved C-terminal Nucleic acid Binding Domain (NDB2); binds to Domain II of 25S and 5.8S rRNAs; homologous to mammalian ribosomal protein L7 and bacterial L30; RPL7B has a paralog, RPL7A, that arose from …	I	6.85384	6.39058	5.84777	5.15703	4.3523	3.25532	1.97459	0.888434		II	IV	68.2106	3.02546
YGR103W	NOP7	Component of several different pre-ribosomal particles; forms a complex with Ytm1p and Erb1p that is required for maturation of the large ribosomal subunit; required for exit from G<sub>0</sub> and the initiation of cell proliferation	I	9.3028	8.5951	8.07101	6.99576	5.66555	4.33236	2.62677	0.777922	IV	I	III	414.371	18.3793
YMR143W	RPS16A	Protein component of the small (40S) ribosomal subunit; homologous to mammalian ribosomal protein S16 and bacterial S9; RPS16A has a paralog, RPS16B, that arose from the whole genome duplication	I	8.43124	7.21264	6.11293	4.99143	3.98322	3.24484	2.28421	2.07464		II	I	1028.17	45.6043
YCR047C	BUD23	Methyltransferase that methylates residue G1575 of 18S rRNA; required for rRNA processing and nuclear export of 40S ribosomal subunits independently of methylation activity; diploid mutant displays random budding pattern; functional homolog of human WBSCR22	I	7.84048	7.32654	6.86702	6.18855	5.18855	4.05842	2.43208	0.636429		I		51.2433	2.27288
YOR340C	RPA43	RNA polymerase I subunit A43	I	7.16183	6.50612	5.84371	5.0755	4.41222	3.66856	2.65964	1.37909		II		196.542	8.71755
YBL004W	UTP20	Component of the small-subunit (SSU) processome; SSU processome is involved in the biogenesis of the 18S rRNA	I	8.90352	8.22058	7.56892	6.82306	5.97914	4.76343	2.6187	1.3512		I	II	145.368	6.44775
YBL028C		Protein of unknown function that may interact with ribosomes; green fluorescent protein (GFP)-fusion protein localizes to the nucleolus; predicted to be involved in ribosome biogenesis	I	7.54566	6.73131	6.11388	5.52427	4.54161	3.58568	1.85376	0.900367		II	II	236.1	10.4721
YMR146C	TIF34	eIF3i subunit of the eukaryotic translation initiation factor 3 (eIF3); subunit of the core complex of eIF3; essential for translation; stimulates rate of ribosomal scanning during translation reinitiation	I	9.16758	8.42892	7.63242	6.66763	5.62248	4.4377	3.20215	1.20513	IV	I		440.904	19.5562
YGR175C	ERG1	Squalene epoxidase; catalyzes the epoxidation of squalene to 2,3-oxidosqualene; plays an essential role in the ergosterol-biosynthesis pathway and is the specific target of the antifungal drug terbinafine	I	6.73552	6.13759	5.57158	4.75591	4.02989	2.88237	1.04925	0.189463		III		424.847	18.8439
YNL141W	AAH1	Adenine deaminase (adenine aminohydrolase); converts adenine to hypoxanthine; involved in purine salvage; transcriptionally regulated by nutrient levels and growth phase; Aah1p degraded upon entry into quiescence via SCF and the proteasome	I	8.62638	7.93321	7.15878	6.17095	4.94868	3.80169	2.47244	1.26763		I	II	221.819	9.83873
YPR137W	RRP9	Protein involved in pre-rRNA processing; associated with U3 snRNP; component of small ribosomal subunit (SSU) processosome; ortholog of the human U3-55k protein	I	6.92203	6.43159	5.98096	5.44381	4.83338	3.99005	2.68435	0.880988		II		103.62	4.59605
YAL035W	FUN12	Translation initiation factor eIF5B; GTPase that promotes Met-tRNAiMet binding to ribosomes and ribosomal subunit joining; promotes GTP-dependent maturation of 18S rRNA by Nob1p; protein abundance increases in response to DNA replication stress; homolog of bacterial IF2	I	8.24376	7.56183	6.66307	5.7715	4.88943	3.44895	2.57567	1.01323	IV	I	III	302.965	13.4379
YDL083C	RPS16B	Protein component of the small (40S) ribosomal subunit; homologous to mammalian ribosomal protein S16 and bacterial S9; RPS16B has a paralog, RPS16A, that arose from the whole genome duplication	I	7.84171	6.71642	5.69002	4.73927	3.98409	3.10383	2.01619	0.252628			I	1260.16	55.894
YGL241W	KAP114	Karyopherin, responsible for nuclear import of specific proteins; cargoes include Spt15p, Sua7p, histones H2A and H2B, and Nap1p; amino terminus shows similarity to those of other importins, particularly Cse1p; localization is primarily nuclear; function is regulated by sumoylation; protein abundance increases in response to DNA replication stress	I	7.95363	7.36505	6.76585	6.09876	4.97411	4.062	2.47212	1.40193		II		25.8267	1.14553
YLR298C	YHC1	Component of the U1 snRNP complex required for pre-mRNA splicing; putative ortholog of human U1C protein, which is involved in formation of a complex between U1 snRNP and the pre-mRNA 5' splice site	I	6.26538	5.68395	5.36168	4.79782	4.24694	3.3475	1.99832	-0.119012		II		29.9894	1.33017
YMR309C	NIP1	eIF3c subunit of the eukaryotic translation initiation factor 3 (eIF3); involved in the assembly of preinitiation complex and start codon selection	I	6.35748	5.87463	5.29971	4.52269	3.94318	3.15008	2.33362	0.282475		II		401.322	17.8005
YLR300W	EXG1	Major exo-1,3-beta-glucanase of the cell wall; involved in cell wall beta-glucan assembly; exists as three differentially glycosylated isoenzymes; EXG1 has a paralog, SPR1, that arose from the whole genome duplication	I	7.26022	6.55623	5.85083	4.99278	4.07456	3.0866	1.68193	0.460966		II	II	470.637	20.8749
YGR063C	SPT4	Component of the universally conserved Spt4/5 complex (DSIF complex); the complex has multiple roles in concert with RNA polymerases I and II, including regulation of transcription elongation, RNA processing, quality control, and transcription-coupled DNA repair; Spt4p also localizes to kinetochores and heterochromatin and affects chromosome dynamics and silencing; required for transcription thro…	I	7.01314	6.42852	5.86243	5.53847	5.23936	4.83788	4.25586	3.31037		II		67.9536	3.01406
YDL166C	FAP7	Essential NTPase required for small ribosome subunit synthesis; mediates processing of the 20S pre-rRNA at site D in the cytoplasm but associates only transiently with 43S preribosomes via Rps14p; complex with Rps14 is conserved between humans, yeast, and arches; may be the endonuclease for site D; depletion leads to accumulation of pre-40S ribosomes in 80S-like ribosomes	I	7.34058	6.92126	6.5466	6.00907	5.40592	4.80396	3.78688	2.90677		II		66.0429	2.92931
YPL210C	SRP72	Core component of the signal recognition particle (SRP); the SRP is a ribonucleoprotein (RNP) complex that functions in targeting nascent secretory proteins to the endoplasmic reticulum (ER) membrane	I	8.33186	7.52935	6.98176	6.24955	5.13582	3.56023	1.41613	0.03092	IV	II	II	101.965	4.52264
YMR044W	IOC4	Member of a complex (Isw1b) with Isw1p and Ioc2p; interacts directly with H3K36me3 nucleosomes through its PWWP domain to recruit the Isw1b complex to open reading frames in a Set2p-dependent manner; Isw1b exhibits nucleosome-stimulated ATPase activity and acts within coding regions to coordinate transcription elongation with termination and processing	I	6.70007	6.16985	5.76881	5.23689	4.7741	3.9213	2.87211	1.09482		II	II	21.4135	0.94979
YJR109C	CPA2	Large subunit of carbamoyl phosphate synthetase; carbamoyl phosphate synthetase catalyzes a step in the synthesis of citrulline, an arginine precursor	I	9.05407	8.54475	7.90788	7.15572	6.20494	5.07432	3.71389	2.48992		I	III	66.6944	2.95821
YDR353W	TRR1	Cytoplasmic thioredoxin reductase; key regulatory enzyme that determines the redox state of the thioredoxin system, which acts as a disulfide reductase system and protects cells against both oxidative and reductive stress; protein abundance increases in response to DNA replication stress; TRR1 has a paralog, TRR2, that arose from the whole genome duplication	I	7.99453	7.0667	6.09464	4.70458	3.52023	2.46595	1.1179	-0.22908		II	III	473.535	21.0035
YOR103C	OST2	Epsilon subunit of the oligosaccharyltransferase complex; located in the ER lumen; catalyzes asparagine-linked glycosylation of newly synthesized proteins	I	8.60653	7.87323	7.19863	6.29308	5.14142	3.8007	2.58398	0.819233		I	II	125.825	5.58093
YBR247C	ENP1	Protein associated with U3 and U14 snoRNAs; required for pre-rRNA processing and 40S ribosomal subunit synthesis; localized in the nucleus and concentrated in the nucleolus	I	8.36408	7.95029	7.50319	6.83932	6.1277	5.20981	3.44142	2.04678		I	IV	129.123	5.72723
YMR116C	ASC1	G-protein beta subunit and guanine dissociation inhibitor for Gpa2p; ortholog of RACK1 that inhibits translation; core component of the small (40S) ribosomal subunit; required to prevent frameshifting at ribosomes stalled at repeated CGA codons; regulates P-body formation induced by replication stress; represses Gcn4p in the absence of amino acid starvation	I	8.4489	7.82013	7.19756	6.52636	5.76787	4.85909	3.72349	1.99186		II	II	2553.12	113.243
YGL123W	RPS2	Protein component of the small (40S) subunit; essential for control of translational accuracy; phosphorylation by C-terminal domain kinase I (CTDK-I) enhances translational accuracy; methylated on one or more arginine residues by Hmt1p; homologous to mammalian ribosomal protein S2 and bacterial S5	I	9.17647	7.89809	6.86036	5.51432	4.33331	3.34059	2.52871	1.78887	IV	III	III	4878.04	216.364
YER126C	NSA2	Protein constituent of 66S pre-ribosomal particles; contributes to processing of the 27S pre-rRNA	I	6.24795	5.65427	5.21148	4.62861	3.84199	3.13864	1.67819	1.0779		II	III	220.822	9.7945
YOL021C	DIS3	Exosome core complex catalytic subunit; has both endonuclease and 3'-5' exonuclease activity; involved in 3'-5' RNA processing and degradation in both the nucleus and the cytoplasm; role in degradation of tRNAs; has similarity to E. coli RNase R and to human DIS3; mutations in Dis3p corresponding to human mutations implicated in multiple myeloma cause phenotypes suggesting impaired exosome functi…	I	9.492	8.88064	8.22888	7.36817	6.52076	5.38332	3.77566	1.66636	III	I	III	84.3615	3.74183
YKL164C	PIR1	O-glycosylated protein required for cell wall stability; attached to the cell wall via beta-1,3-glucan; mediates mitochondrial translocation of Apn1p; expression regulated by the cell integrity pathway and by Swi5p during the cell cycle; PIR1 has a paralog, YJL160C, that arose from the whole genome duplication	I	6.07608	5.76377	5.52639	5.2136	4.66045	4.25342	3.36886	2.47028		II		391.664	17.3721
YCR093W	CDC39	Component of the CCR4-NOT1 core complex; this complex has multiple roles in regulating mRNA levels including regulation of transcription and destabilizing mRNAs by deadenylation; basal transcription factor	I	6.72822	6.10504	5.61405	4.98999	4.22789	3.16963	1.89763	0.820237		II		106.19	4.71003
YKL007W	CAP1	Alpha subunit of the capping protein heterodimer (Cap1p and Cap2p); capping protein (CP) binds to the barbed ends of actin filaments preventing further polymerization; localized predominantly to cortical actin patches; protein increases in abundance and relocalizes from bud neck to plasma membrane upon DNA replication stress	I	7.98434	7.34988	6.74084	6.00124	5.15561	4.02284	2.87701	0.369852		I		88.0068	3.90351
YML080W	DUS1	Dihydrouridine synthase; member of a widespread family of conserved proteins including Smm1p, Dus3p, and Dus4p; modifies pre-tRNA(Phe) at U17	I	7.2446	6.44508	5.92902	5.24954	4.4577	3.69178	2.38369	1.10682		II	IV	47.5505	2.10909
YMR300C	ADE4	Phosphoribosylpyrophosphate amidotransferase (PRPPAT); catalyzes first step of the 'de novo' purine nucleotide biosynthetic pathway; also known as amidophosphoribosyltransferase	I	7.03245	6.38314	5.84991	4.95796	4.06529	3.12086	1.99787	0.302036		II		92.3938	4.0981
YAL021C	CCR4	Component of the CCR4-NOT transcriptional complex; CCR4-NOT is involved in regulation of gene expression; component of the major cytoplasmic deadenylase, which is involved in mRNA poly(A) tail shortening	I	7.28939	6.81597	6.42882	5.99036	5.44133	4.62362	3.69627	2.0043		I		66.6398	2.95579
YGR187C	HGH1	Nonessential protein of unknown function; predicted to be involved in ribosome biogenesis; green fluorescent protein (GFP)-fusion protein localizes to the cytoplasm; similar to mammalian BRP16 (Brain protein 16); relative distribution to the nucleus increases upon DNA replication stress	I	7.47871	6.75084	6.04422	4.95244	3.84616	2.63778	1.5254	0.956989		II	II	64.7171	2.87051
YNL030W	HHF2	Histone H4; core histone protein required for chromatin assembly and chromosome function; one of two identical histone proteins (see also HHF1); contributes to telomeric silencing; N-terminal domain involved in maintaining genomic integrity	I	8.41271	7.86841	7.35261	6.77383	5.96387	4.78067	3.25118	1.9893		II	I	1294.96	57.4374
YLR196W	PWP1	Protein with WD-40 repeats involved in rRNA processing; associates with trans-acting ribosome biogenesis factors; similar to beta-transducin superfamily	I	9.12074	8.56036	7.82026	7.03232	6.07489	5.08368	4.03855	2.99013		I	IV	176.446	7.82622
YLL011W	SOF1	Protein required for biogenesis of 40S (small) ribosomal subunit; has similarity to the beta subunit of trimeric G-proteins and the splicing factor Prp4p; essential gene	I	8.44294	7.80367	7.23876	6.39631	5.44682	4.27195	2.99337	1.49173	III	I	II	112.164	4.975
YLR109W	AHP1	Thiol-specific peroxiredoxin; reduces hydroperoxides to protect against oxidative damage; function in vivo requires covalent conjugation to Urm1p	I	7.97106	7.14493	6.37518	5.59029	4.63214	4.06057	3.16351	2.2287	I		II	3208.18	142.298
YJR063W	RPA12	RNA polymerase I subunit A12.2; contains two zinc binding domains, and the N terminal domain is responsible for anchoring to the RNA pol I complex	I	8.95875	8.34002	7.65857	6.90066	6.00383	4.81033	3.57842	2.15761		I		202.857	8.99767
YER049W	TPA1	Fe(II)/2-oxoglutarate-dependent dioxygenase family member; catalyzes the repair of methyl-base lesions in both ss and dsDNA by oxidative demethylation; Poly(rA)-binding protein involved in mRNA poly(A) tail length and mRNA stability; role in translation termination efficiency; interacts with Sup45p (eRF1), Sup35p (eRF3) and Pab1p; similar to human prolyl 4-hydroxylase OGFOD1; binds Fe(II) and 2-o…	I	8.20596	7.70511	7.1958	6.45965	5.62869	4.59033	3.34143	1.69788		II	II	151.915	6.73815
YBL003C	HTA2	Histone H2A; core histone protein required for chromatin assembly and chromosome function; one of two nearly identical (see also HTA1) subtypes; DNA damage-dependent phosphorylation by Mec1p facilitates DNA repair; acetylated by Nat4p	I	7.25985	6.54952	5.93906	4.98514	4.00709	2.71284	1.54317	0.272595		II		626.325	27.7804
YBR079C	RPG1	eIF3a subunit of the eukaryotic translation initiation factor 3 (eIF3); subunit of the core complex of eIF3; essential for translation; part of a Prt1p-Rpg1p-Nip1p subcomplex that stimulates binding of mRNA and tRNA(i)Met to ribosomes; involved in translation reinitiation	I	7.59493	6.74668	6.0135	5.09144	4.07711	2.73486	1.15761	-0.348244		II	IV	253.67	11.2514
YLR380W	CSR1	Phosphatidylinositol transfer protein; has a potential role in regulating lipid and fatty acid metabolism under heme-depleted conditions; interacts specifically with thioredoxin peroxidase; may have a role in oxidative stress resistance; protein abundance increases in response to DNA replication stress	I	7.24369	6.75672	6.28866	5.61768	5.05111	4.37185	3.18176	1.50929		II		91.2077	4.04549
YPL146C	NOP53	Nucleolar protein; involved in biogenesis of the 60S subunit of the ribosome; interacts with rRNA processing factors Cbf5p and Nop2p and with the nucleolar proteins Nop17p and Nip7p; null mutant is viable but growth is severely impaired	I	8.60646	7.99807	7.45045	6.83887	6.1962	5.40862	4.27064	3.06407		I	III	111.782	4.95806
YGR211W	ZPR1	Essential protein with two zinc fingers; present in the nucleus of growing cells but relocates to the cytoplasm in starved cells via a process mediated by Cpr1p; binds to translation elongation factor eEF-1 (Tef1p); relative distribution to the nucleus increases upon DNA replication stress	I	8.06371	7.41077	6.63342	5.77144	4.88712	3.66125	1.98325	0.675555		I	IV	183.926	8.15797
YKR035W-A	DID2	Class E protein of the vacuolar protein-sorting (Vps) pathway; binds Vps4p and directs it to dissociate ESCRT-III complexes; forms a functional and physical complex with Ist1p; human ortholog may be altered in breast tumors	I	7.08408	6.56578	6.0644	5.31458	4.65278	3.82604	2.55136	1.31243		I	III	74.9988	3.32655
YHR072W-A	NOP10	Subunit of box H/ACA snoRNP complex; required for pseudouridylation and processing of pre-18S rRNA	I	9.37653	8.61279	7.97853	7.08652	6.15425	4.93117	3.48335	2.06036		II		919.379	40.7787
YFR001W	LOC1	Nuclear protein involved in asymmetric localization of ASH1 mRNA; binds double-stranded RNA in vitro; constituent of 66S pre-ribosomal particles; required at post-transcriptional step for efficient retrotransposition; absence results in decreased Ty1 Gag:GFP protein levels; relocalizes from nucleus to cytoplasm upon DNA replication stress	I	7.00307	6.15111	5.35846	4.64424	3.93457	2.73766	2.32373	-0.658224		II	II	77.313	3.42919
YDR156W	RPA14	RNA polymerase I subunit A14	I	8.71922	7.8885	7.12897	6.1238	5.11498	3.97476	2.29229	0.712568		I	III	86.0163	3.81523
YCR031C	RPS14A	Protein component of the small (40S) ribosomal subunit; required for ribosome assembly and 20S pre-rRNA processing; mutations confer cryptopleurine resistance; homologous to mammalian ribosomal protein S14 and bacterial S11; RPS14A has a paralog, RPS14B, that arose from the whole genome duplication	I	7.21378	6.0285	5.30364	4.58875	3.78537	2.34344	1.24759	0.531398	II	II	I	1879.06	83.3452
YNL175C	NOP13	Nucleolar protein found in preribosomal complexes; contains an RNA recognition motif (RRM); relative distribution to the nucleolus increases upon DNA replication stress	I	8.26252	7.33331	6.56563	5.49165	4.61057	3.18907	0.952637	-1.30103		III	III	182.561	8.09741
YPR143W	RRP15	Nucleolar protein; constituent of pre-60S ribosomal particles; required for proper processing of the 27S pre-rRNA at the A3 and B1 sites to yield mature 5.8S and 25S rRNAs	I	7.73656	7.32763	6.90983	6.28784	5.62994	4.79573	3.40407	1.67875		I		111.799	4.9588
YMR290C	HAS1	ATP-dependent RNA helicase; involved in the biogenesis of 40S and 60S ribosome subunits; localizes to both the nuclear periphery and nucleolus; highly enriched in nuclear pore complex fractions; constituent of 66S pre-ribosomal particles	I	9.65327	9.01325	8.37352	7.50802	6.41189	5.06263	3.50824	1.79528	IV	I	II	251.524	11.1563
YIL069C	RPS24B	Protein component of the small (40S) ribosomal subunit; homologous to mammalian ribosomal protein S24, no bacterial homolog; RPS24B has a paralog, RPS24A, that arose from the whole genome duplication	I	9.05291	8.05795	7.25762	6.47434	5.54885	3.7688	1.98672	0.361933	III	I	I	495.88	21.9946
YOR327C	SNC2	Vesicle membrane receptor protein (v-SNARE); involved in the fusion between Golgi-derived secretory vesicles with the plasma membrane; Snc2p levels regulated by Vps45p; member of the synaptobrevin/VAMP family of R-type v-SNARE proteins; SNC2 has a paralog, SNC1, that arose from the whole genome duplication	I	6.58745	6.07841	5.64874	4.96862	4.03387	2.80635	1.60469	-0.333078		II	IV	164.574	7.29961
YKL009W	MRT4	Protein involved in mRNA turnover and ribosome assembly; required at post-transcriptional step for efficient retrotransposition; localizes to the nucleolus	I	7.24243	6.53562	6.19852	5.56545	4.97851	4.14736	3.29419	1.89942		II	II	299.343	13.2773
YLR017W	MEU1	Methylthioadenosine phosphorylase (MTAP); catalyzes the initial step in the methionine salvage pathway; affects polyamine biosynthesis through regulation of ornithine decarboxylase (Spe1p) activity; regulates ADH2 gene expression	I	8.10599	7.39609	6.68279	5.8748	4.72937	3.42077	2.14833	-0.303215		II	II	150.332	6.66792
YPL081W	RPS9A	Protein component of the small (40S) ribosomal subunit; homologous to mammalian ribosomal protein S9 and bacterial S4; RPS9A has a paralog, RPS9B, that arose from the whole genome duplication	I	8.75045	8.23183	7.63209	6.84165	5.88898	4.76022	3.59055	1.76388		I	I	168.582	7.47741
YBR088C	POL30	Proliferating cell nuclear antigen (PCNA); functions as the sliding clamp for DNA polymerase delta; may function as a docking site for other proteins required for mitotic and meiotic chromosomal DNA replication and for DNA repair	I	7.64335	7.20836	6.78453	6.36977	5.72981	4.78423	3.62691	2.38929		II		187.771	8.32853
YJL138C	TIF2	Translation initiation factor eIF4A; DEA(D/H)-box RNA helicase that couples ATPase activity to RNA binding and unwinding; forms a dumbbell structure of two compact domains connected by a linker; interacts with eIF4G; protein abundance increases in response to DNA replication stress; TIF2 has a paralog, TIF1, that arose from the whole genome duplication	I	7.60392	6.77968	5.88598	4.75447	3.6187	2.43937	1.42573	0.820237		III		202.08	8.96319
YOR252W	TMA16	Protein of unknown function that associates with ribosomes	I	6.6613	6.37787	6.04098	5.65543	4.98686	4.10841	3.06958	1.40327		II		93.1416	4.13126
YJL109C	UTP10	Nucleolar protein; component of the small subunit (SSU) processome containing the U3 snoRNA that is involved in processing of pre-18S rRNA; mutant has increased aneuploidy tolerance	I	8.30822	7.60157	6.89906	6.126	5.18357	3.27204	1.51706	-0.318069		II		180.472	8.00477
YLR197W	NOP56	Essential evolutionarily-conserved nucleolar protein; component of the box C/D snoRNP complexes that direct 2'-O-methylation of pre-rRNA during its maturation; overexpression causes spindle orientation defects	II	5.12827	4.44558	3.73716	2.68248	1.81293	1.24685	0.178922	-0.800073		IV		626.338	27.781
YNL216W	RAP1	Essential DNA-binding transcription regulator that binds many loci; involved in transcription activation and repression, chromatin silencing, and telomere length maintenance; relocalizes to the cytosol in response to hypoxia; conserved protein with an N-terminal BRCT domain, a central region with homology to the Myb DNA binding domain, and a C-terminal Rap1-specific protein-interaction domain (RC…	II	5.69332	4.97873	4.29297	3.16465	2.18907	0.452238	-0.758957	-2.18757		III		60.4756	2.68238
YBR017C	KAP104	Transportin or cytosolic karyopherin beta 2; functions in the rg-nuclear localization signal-mediated nuclear import/reimport of mRNA-binding proteins Nab2p and Hrp1p; regulates asymmetric protein synthesis in daughter cells during mitosis	II	4.73787	4.54294	4.0027	3.54271	2.98907	2.03428	-0.041188	-0.86403		III		91.9624	4.07896
YNL268W	LYP1	Lysine permease; one of three amino acid permeases (Alp1p, Can1p, Lyp1p) responsible for uptake of cationic amino acids	II	6.95222	6.12965	5.43943	4.19742	3.17323	2.48501	1.07222	-0.288513	IV	II	III	100.435	4.45477
YMR067C	UBX4	UBX domain-containing protein that interacts with Cdc48p; involved in degradation of polyubiquitinated proteins via the ERAD (ER-associated degradation) pathway; modulates the Cdc48p-Nplp-Ufd1p AAA ATPase complex during its role in delivery of misfolded proteins to the proteasome; protein abundance increases in response to DNA replication stress	II	4.9496	4.3359	3.87175	3.04281	1.60017	0.24254	-0.363571	-0.86403		IV		37.7812	1.67577
YDR365C	ESF1	Nucleolar protein involved in pre-rRNA processing; depletion causes severely decreased 18S rRNA levels	II	6.02745	5.22596	4.32273	3.18907	1.62813	0.46964	-1.05356	-3.88599		III	III	146.357	6.4916
YPR132W	RPS23B	Ribosomal protein 28 (rp28) of the small (40S) ribosomal subunit; required for translational accuracy; homologous to mammalian ribosomal protein S23 and bacterial S12; RPS23B has a paralog, RPS23A, that arose from the whole genome duplication; deletion of both RPS23A and RPS23B is lethal	II	6.05445	5.00153	4.19901	2.98672	2.12147	1.2832	0.697877	-0.185555			II	1366.72	60.6205
YDR144C	MKC7	GPI-anchored aspartyl protease; member of the yapsin family of proteases involved in cell wall growth and maintenance; shares functions with Yap3p and Kex2p; MKC7 has a paralog, YPS1, that arose from the whole genome duplication	II	6.65106	5.89976	5.00978	4.03479	3.39022	2.09804	1.28175	-1.27182		II		95.4353	4.233
YMR014W	BUD22	Protein required for rRNA maturation and ribosomal subunit biogenesis; required for 18S rRNA maturation; also required for small ribosomal subunit biogenesis; cosediments with pre-ribosomal particles; mutation decreases efficiency of +1 Ty1 frameshifting and transposition, and affects budding pattern	II	5.76629	5.08393	4.59103	3.88643	2.90541	2.09243	1.15143	-1.84239		II	IV	42.9279	1.90405
YIL096C	BMT5	Methyltransferase required for m3U2634 methylation of the 25S rRNA; S-adenosylmethionine-dependent; associates with precursors of the 60S ribosomal subunit; predicted to be involved in ribosome biogenesis	II	5.79815	5.11109	4.24198	3.31502	2.12147	0.683034	-0.86403	-2.30103		III		58.7147	2.60427
YOR309C		Dubious open reading frame; unlikely to encode a functional protein, based on available experimental and comparative sequence data; partially overlaps the verified gene NOP58	II	5.00633	4.57612	4.32623	3.70221	2.56011	1.94287	1.0844	-0.494925		III		96.8483	4.29567
YGR128C	UTP8	Nucleolar protein required for export of tRNAs from the nucleus; also copurifies with the small subunit (SSU) processome containing the U3 snoRNA that is involved in processing of pre-18S rRNA	II	5.48275	4.85901	4.22384	3.31791	2.10362	1.03092	-0.842394	-3.71898		III	IV	120.152	5.32931
YGR130C		Component of the eisosome with unknown function; GFP-fusion protein localizes to the cytoplasm; specifically phosphorylated in vitro by mammalian diphosphoinositol pentakisphosphate (IP7)	II	6.06032	5.44596	4.7599	3.81961	2.57165	0.791824	0.321334	-2.30103		II	II	36.3862	1.6139
YBL027W	RPL19B	Ribosomal 60S subunit protein L19B; rpl19a and rpl19b single null mutations result in slow growth, while the double null mutation is lethal; homologous to mammalian ribosomal protein L19, no bacterial homolog; RPL19B has a paralog, RPL19A, that arose from the whole genome duplication	II	6.54296	5.45639	4.45935	3.46378	2.74945	2.03135	-0.132077	-0.363571	IV	II	I	2218.02	98.3794
YLR369W	SSQ1	Mitochondrial hsp70-type molecular chaperone; required for assembly of iron/sulfur clusters into proteins at a step after cluster synthesis, and for maturation of Yfh1p, which is a homolog of human frataxin implicated in Friedreich's ataxia	II	5.41356	4.79146	4.26075	3.41854	2.80242	1.40779	0.360554	-1.27182		III		23.6832	1.05046
YPL190C	NAB3	RNA-binding protein, subunit of Nrd1 complex (Nrd1p-Nab3p-Sen1p); complex interacts with exosome to mediate 3'-end formation of some mRNAs, snRNAs, snoRNAs, and CUTs; required for termination of non-poly(A) transcripts and efficient splicing; Nrd1-Nab3 pathway appears to have a role in rapid suppression of some genes when cells are shifted to poor growth conditions, indicating role for Nrd1-Nab3 …	II	6.60863	5.67776	4.7244	4.12213	3.32903	2.85848	1.1947	-1.84239	III	II		78.5244	3.48293
YFL023W	BUD27	Unconventional prefoldin protein involved in translation initiation; required for correct assembly of RNAP I, II, and III in an Rpb5p-dependent manner; shuttles between nucleus and cytoplasm; mutants have inappropriate expression of nutrient sensitive genes due to translational derepression of Gcn4p transcription factor; diploid mutants show random budding; ortholog of human URI/RMP	II	6.20581	5.58329	4.85712	4.05594	3.01131	1.74456	0.450944	-3.71898		II		28.2265	1.25198
YGR274C	TAF1	TFIID subunit, involved in RNA pol II transcription initiation; possesses in vitro histone acetyltransferase activity but its role in vivo appears to be minor; involved in promoter binding and G1/S progression; relocalizes to the cytosol in response to hypoxia	II	6.30047	5.64642	4.92716	4.20094	3.16618	2.05172	0.546665	-1.56407		II	I	26.1115	1.15817
YEL055C	POL5	DNA Polymerase phi; has sequence similarity to the human MybBP1A and weak sequence similarity to B-type DNA polymerases, not required for chromosomal DNA replication; required for the synthesis of rRNA	II	5.70335	5.21114	4.47088	3.40487	2.55951	2.17588	1.43839	-0.658224	III	II	III	130.407	5.78417
YLL045C	RPL8B	Ribosomal 60S subunit protein L8B; required for processing of 27SA3 pre-rRNA to 27SB pre-rRNA during assembly of large ribosomal subunit; depletion leads to a turnover of pre-rRNA; L8 binds to Domain I of 25S and 5.8 S rRNAs; mutation results in decreased amounts of free 60S subunits; homologous to mammalian ribosomal protein L7A, no bacterial homolog; RPL8B has a paralog, RPL8A, that arose from …	II	7.18929	6.2289	5.23004	4.03544	2.89579	2.04345	1.24179	-0.158568		III	II	2123.95	94.2071
YKR057W	RPS21A	Protein component of the small (40S) ribosomal subunit; homologous to mammalian ribosomal protein S21, no bacterial homolog; RPS21A has a paralog, RPS21B, that arose from the whole genome duplication	II	5.60884	4.76892	4.02445	2.94776	1.79974	0.792847	0.032652	-0.696529		III	II	670.993	29.7617
YGR090W	UTP22	Component of the small-subunit processome; required for nuclear export of tRNAs; may facilitate binding of Utp8p to aminoacylated tRNAs and their delivery to Los1p for export; conserved from yeast to mammals	II	6.25229	5.50292	4.72115	4.03271	3.17985	2.04012	1.10682	-0.639446		III	IV	121.222	5.37675
YJL197W	UBP12	Ubiquitin-specific protease; cleaves ubiquitin from ubiquitinated proteins; present in the nucleus and cytoplasm	II	6.20341	5.40316	4.6452	3.75363	2.65746	1.23747	0.303471			III		35.3655	1.56863
YNR053C	NOG2	Putative GTPase; associates with pre-60S ribosomal subunits in the nucleolus and is required for their nuclear export and maturation	II	5.36384	4.82083	4.34151	3.82422	3.18269	2.23672	1.46097	-0.173995				166.886	7.40219
YOR004W	UTP23	Component of the small subunit processome; involved in 40S ribosomal subunit biogenesis; interacts with snR30 and is required for dissociation of snR30 from large pre-ribosomal particles; has homology to PINc domain protein Fcf1p, although the PINc domain of Utp23p is not required for function; essential protein	II	5.17531	4.56132	3.73792	3.32545	2.96383	1.74918	1.1179	0.321334	III	III	IV	105.629	4.68512
YPL220W	RPL1A	Ribosomal 60S subunit protein L1A; N-terminally acetylated; homologous to mammalian ribosomal protein L10A and bacterial L1; RPL1A has a paralog, RPL1B, that arose from the whole genome duplication; rpl1a rpl1b double null mutation is lethal	II	6.17735	5.2995	4.40545	3.35037	2.40327	1.6287	0.28393	-0.301032	III	II	I	194.125	8.61034
YDR463W	STP1	Transcription factor; contains a N-terminal regulatory motif (RI) that acts as a cytoplasmic retention determinant and as an Asi dependent degron in the nucleus; undergoes proteolytic processing by SPS (Ssy1p-Ptr3p-Ssy5p)-sensor component Ssy5p in response to extracellular amino acids; activates transcription of amino acid permease genes and may have a role in tRNA processing; STP1 has a paralog,…	II	7.08656	6.42356	5.90305	4.77316	3.72802	2.64163	0.505075	-1.84239		II		39.6995	1.76086
YHR142W	CHS7	Protein of unknown function; may be involved in chitin biosynthesis by regulation of Chs3p export from the ER; relocalizes from bud neck to ER upon DNA replication stress	II	4.69817	3.98137	3.65172	2.5337	2.03342	0.642979	0.359174	-3.88599		IV	IV	62.329	2.76458
YAL044C	GCV3	H subunit of the mitochondrial glycine decarboxylase complex; glycine decarboxylase is required for the catabolism of glycine to 5,10-methylene-THF; also required for all protein lipoylation; expression is regulated by levels of 5,10-methylene-THF	II	5.55577	4.45529	3.72634	2.81854	1.50929	0.913143	0.415464	-1.80007	III	III	III	263.376	11.6819
YOL080C	REX4	Putative RNA exonuclease; possibly involved in pre-rRNA processing and ribosome assembly	II	4.82295	4.32784	3.88051	3.39432	2.90494	1.80952	0.627558	-0.288513		III		89.5267	3.97093
YJL148W	RPA34	RNA polymerase I subunit A34.5; essential for nucleolar assembly and for high polymerase loading rate; nucleolar localization depends on Rpa49p	II	5.65548	4.92152	4.4458	3.35822	2.18235	0.841432	0.371222	-1.07864		II	II	121.009	5.36729
YER036C	ARB1	ATPase of the ATP-binding cassette (ABC) family; involved in 40S and 60S ribosome biogenesis, has similarity to Gcn20p; shuttles from nucleus to cytoplasm, physically interacts with Tif6p, Lsg1p; human homolog ABCF2 can complement yeast ARB1 mutant	II	5.89704	4.79165	3.5138	1.89715	0.777922	0.434624	-0.821078	-1.21511		IV	IV	528.763	23.4531
YOR061W	CKA2	Alpha' catalytic subunit of casein kinase 2 (CK2); CK2 is a Ser/Thr protein kinase with roles in cell growth and proliferation; CK2, comprised of CKA1, CKA2, CKB1 and CKB2, has many substrates including transcription factors and all RNA polymerases; protein abundance increases in response to DNA replication stress; regulates Fkh1p-mediated donor preference during mating-type switching	II	5.0211	4.60952	3.71581	2.82312	2.30653	1.06567	-0.397053	-3.71898		II		130.675	5.79603
YHR001W	OSH7	Oxysterol-binding protein; part of family with seven members in S. cerevisiae; family members have overlapping, redundant functions in sterol metabolism and collectively perform a function essential for viability; OSH7 has a paralog, OSH6, that arose from the whole genome duplication	II	6.01611	5.2946	4.21548	3.40905	2.69308	1.74456	-3.88599			III	III	43.2715	1.91929
YMR031C	EIS1	Component of the eisosome required for proper eisosome assembly; similar to Uso1p; authentic, non-tagged protein is detected in a phosphorylated state in highly purified mitochondria in high-throughput studies; protein increases in abundance and relocalizes from plasma membrane to cytoplasm upon DNA replication stress; EIS1 has a paralog, YKL050C, that arose from the whole genome duplication	II	4.84115	4.46988	4.10949	3.7433	2.60185	1.86695	0.805594	-1.00468		III		30.3869	1.3478
YDL227C	HO	Site-specific endonuclease; required for gene conversion at the MAT locus (homothallic switching) through the generation of a ds DNA break; expression restricted to mother cells in late G1 as controlled by Swi4p-Swi6p, Swi5p, and Ash1p	II	6.0966	5.4649	4.95101	4.47228	3.39448	2.16257	0.398736	-0.677249		III	II	69.8576	3.09851
YAL011W	SWC3	Protein of unknown function; component of the SWR1 complex, which exchanges histone variant H2AZ (Htz1p) for chromatin-bound histone H2A; required for formation of nuclear-associated array of smooth endoplasmic reticulum known as karmellae	II	4.89376	4.18193	3.54419	2.99359	2.42061	1.9063	0.230873	-2.18757		III	II	14.6497	0.649784
YBL002W	HTB2	Histone H2B; core histone protein required for chromatin assembly and chromosome function; nearly identical to HTB1; Rad6p-Bre1p-Lge1p mediated ubiquitination regulates reassembly after DNA replication, transcriptional activation, meiotic DSB formation and H3 methylation	II	5.06985	4.18591	3.55386	2.7034	2.05214	1.35588	-0.080511	-0.318069		III	II	1044.94	46.3478
YMR142C	RPL13B	Ribosomal 60S subunit protein L13B; not essential for viability; homologous to mammalian ribosomal protein L13, no bacterial homolog; RPL13B has a paralog, RPL13A, that arose from the whole genome duplication	II	7.45092	6.22085	5.15902	4.03939	3.28211	2.09565	1.47396	-1.56407		III	II	1738.19	77.0967
YJL081C	ARP4	Nuclear actin-related protein involved in chromatin remodeling; component of chromatin-remodeling enzyme complexes	II	5.87253	5.08726	4.45341	3.34462	2.60185	0.232381	-1.56407	-2.88599		III	III	74.0896	3.28622
YPL082C	MOT1	Essential protein involved in regulation of transcription; removes Spt15p (TBP) from DNA via its C-terminal ATPase activity; may have a role in ensuring that soluble TBP is available to bind TATA-less promoters; forms a complex with TBP that binds TATA DNA with high affinity but with altered specificity; the Mot1p-Spt15p-DNA ternary complex contains unbent DNA	II	5.9228	5.19866	4.16951	2.9435	1.28739	-0.257432	-0.71607	-2.30103		III	II	56.8252	2.52046
YNL112W	DBP2	ATP-dependent RNA helicase of the DEAD-box protein family; has a strong preference for dsRNA; interacts with YRA1; required for the assembly of Yra1p, Nab2p and Mex67p onto mRNA and formation of nuclear mRNP; involved in mRNA decay and rRNA processing; may be involved in suppression of transcription from cryptic initiation sites	II	6.0269	5.42453	4.77517	3.85909	3.0301	1.76741	0.168303	-0.86403	II	II		242.634	10.762
YBR029C	CDS1	Phosphatidate cytidylyltransferase (CDP-diglyceride synthetase); an enzyme that catalyzes that conversion of CTP + phosphate into diphosphate + CDP-diaclglyerol, a critical step in the synthesis of all major yeast phospholipids	II	5.07903	4.54924	4.06375	3.30742	2.10723	0.820237	-1.05356	-2.88599				95.1048	4.21834
YNL124W	NAF1	RNA-binding protein required for the assembly of box H/ACA snoRNPs; thus required for pre-rRNA processing; forms a complex with Shq1p and interacts with H/ACA snoRNP components Nhp2p and Cbf5p; similar to Gar1p	II	6.58534	5.67552	4.92779	3.9213	2.98583	0.988404	-0.080511	-1.71898		III		52.4298	2.32551
YPL118W	MRP51	Mitochondrial ribosomal protein of the small subunit; MRP51 exhibits genetic interactions with mutations in the COX2 and COX3 mRNA 5'-untranslated leader sequences	II	5.87938	5.16658	4.21744	3.67016	2.39806	1.50929	-0.394724	-0.885995	II	III	III	85.9629	3.81285
YMR194W	RPL36A	Ribosomal 60S subunit protein L36A; N-terminally acetylated; binds to 5.8 S rRNA; homologous to mammalian ribosomal protein L36, no bacterial homolog; RPL36A has a paralog, RPL36B, that arose from the whole genome duplication	II	4.99048	3.97924	3.13653	2.32479	1.45725	0.389623	0.055881	-0.696529		IV	II	426.761	18.9289
YLR106C	MDN1	Huge dynein-related AAA-type ATPase (midasin); forms extended pre-60S particle with the Rix1 complex (Rix1p-Ipi1p-Ipi3p); acts in removal of ribosomal biogenesis factors at successive steps of pre-60S assembly and export from nucleus	II	6.77409	5.73675	4.85743	3.76829	2.6637	1.37977	0.360554	-2.24319	IV	II		72.3137	3.20745
YER070W	RNR1	Major isoform of large subunit of ribonucleotide-diphosphate reductase; the RNR complex catalyzes rate-limiting step in dNTP synthesis, regulated by DNA replication and DNA damage checkpoint pathways via localization of small subunits; relative distribution to the nucleus increases upon DNA replication stress; RNR1 has a paralog, RNR3, that arose from the whole genome duplication	II	6.05345	5.33579	4.56683	3.64095	2.60834	1.42508	0.065666	-2.13402		III	II	285.932	12.6824
YOL027C	MDM38	Mitochondrial protein; forms a complex with Mba1p to facilitate recruitment of mRNA-specific translational activators to ribosomes; roles in protein export and K+/H+ exchange; human ortholog Letm1 implicated in Wolf-Hirschhorn syndrome	II	5.47728	4.88503	3.99746	3.24432	2.46531	1.88051	1.32133	-0.363571	I	II	III	81.8506	3.63046
YDL019C	OSH2	Member of an oxysterol-binding protein family with seven members; in S. cerevisiae, family members have overlapping, redundant functions in sterol metabolism and collectively perform a function essential for viability; contains FFAT motif; interacts with ER anchor Scs2p at patches at the plasma membrane and at the nuclear envelope; regulated by sterol binding; OSH2 has a paralog, SWH1, that arose…	II	5.53638	4.79263	3.84878	2.55136	1.68621	0.51349	0.292289	-1.886		III	IV	29.298	1.2995
YER038C	KRE29	Subunit of the SMC5-SMC6 complex; this complex is involved in removal of X-shaped DNA structures that arise between sister chromatids during DNA replication and repair; heterozygous mutant shows haploinsufficiency in K1 killer toxin resistance	II	4.36353	3.98224	3.71189	2.97323	2.62202	1.96405	0.74151	0.123405	IV	IV	III	11.0839	0.491623
YDR385W	EFT2	Elongation factor 2 (EF-2), also encoded by EFT1; catalyzes ribosomal translocation during protein synthesis; contains diphthamide, the unique posttranslationally modified histidine residue specifically ADP-ribosylated by diphtheria toxin; EFT2 has a paralog, EFT1, that arose from the whole genome duplication	II	7.0212	6.21091	5.3966	3.89256	3.05214	1.96405	1.26689	-0.348244		II	III	82.5943	3.66344
YFL017W-A	SMX2	Core Sm protein Sm G; part of heteroheptameric complex (with Smb1p, Smd1p, Smd2p, Smd3p, Sme1p, and Smx3p) that is part of the spliceosomal U1, U2, U4, and U5 snRNPs; homolog of human Sm G	II	5.77759	5.27309	4.76137	4.07803	3.02002	1.85805	0.398736	-0.379063		IV	II	68.6363	3.04434
YLR249W	YEF3	Translation elongation factor 3; contains two ABC cassettes; binds and hydrolyzes ATP; YEF3 has a paralog, HEF3, that arose from the whole genome duplication	II	6.58835	5.41501	4.47936	3.20643	2.06937	1.44721	0.241043	-0.055403		IV	II	4782.61	212.131
YML113W	DAT1	DNA binding protein that recognizes oligo(dA).oligo(dT) tracts; Arg side chain in its N-terminal pentad Gly-Arg-Lys-Pro-Gly repeat is required for DNA-binding; relocalizes to the cytosol in response to hypoxia; not essential for viability	II	5.64878	4.64656	4.04955	3.36586	2.60382	1.22576	0.134358	-1.49493		III	II	34.705	1.53933
YKL057C	NUP120	Subunit of the Nup84p subcomplex of the nuclear pore complex (NPC); contributes to nucleocytoplasmic transport and NPC biogenesis and is involved in establishment of a normal nucleocytoplasmic concentration gradient of the GTPase Gsp1p; also plays roles in several processes that may require localization of genes or chromosomes at the nuclear periphery, including double-strand break repair, transc…	II	5.63583	4.77723	3.98896	3.16237	2.65528	1.24759	0.24254	-2.18757		III		65.8296	2.91985
YBR167C	POP7	Subunit of both RNase MRP and nuclear RNase P; forms a soluble heterodimer with Pop6p that binds P3 domain of RNase MRP and RNase P RNAs; RNase MRP cleaves pre-rRNA, while nuclear RNase P cleaves tRNA precursors to generate mature 5' ends and facilitates turnover of nuclear RNAs	II	5.0951	4.24911	3.85578	3.38632	2.83685	1.80166	-1.21511	-3.88599		IV		36.7394	1.62957
YOR293W	RPS10A	Protein component of the small (40S) ribosomal subunit; homologous to mammalian ribosomal protein S10, no bacterial homolog; RPS10A has a paralog, RPS10B, that arose from the whole genome duplication	II	5.14062	4.07682	3.17667	2.31279	1.60469	0.505075	-0.016749	-0.546468		III	IV	1152.64	51.1251
YPR053C		Dubious open reading frame; unlikely to encode a functional protein, based on available experimental and comparative sequence data; partially overlaps verified gene NHP6A/YPR052C	II	5.27473	4.41165	3.70276	2.86628	2.25765	0.996204	-0.041188	-2.30103		IV	I	5.71642	0.25355
YER131W	RPS26B	Protein component of the small (40S) ribosomal subunit; homologous to mammalian ribosomal protein S26, no bacterial homolog; RPS26B has a paralog, RPS26A, that arose from the whole genome duplication	II	6.90131	5.73846	4.91702	3.90963	2.98499	2.26514	0.920425	0.262646	IV	IV	II	2605.74	115.577
YPL085W	SEC16	COPII vesicle coat protein required for ER transport vesicle budding; essential factor in endoplasmic reticulum exit site (ERES) formation, as well as in COPII-mediated ER-to-Golgi traffic; bound to periphery of ER membranes and may act to stabilize initial COPII complexes; interacts with Sec23p, Sec24p and Sec31p	II	5.07862	4.61414	4.15709	3.13183	2.53017	1.22652	-0.511902	-1.27182		III		46.353	2.05597
YJL012C	VTC4	Vacuolar membrane polyphosphate polymerase; subunit of the vacuolar transporter chaperone (VTC) complex involved in synthesis and transfer of polyP to the vacuole; regulates membrane trafficking; role in non-autophagic vacuolar fusion; protein abundance increases in response to DNA replication stress	II	4.92211	4.30006	3.58926	2.76186	1.66315	0.734328	-0.303215	-1.39705			IV	361.449	16.032
YBR009C	HHF1	Histone H4; core histone protein required for chromatin assembly and chromosome function; one of two identical histone proteins (see also HHF2); contributes to telomeric silencing; N-terminal domain involved in maintaining genomic integrity	II	4.89222	4.29213	3.60469	2.92989	2.25226	1.61646	-0.053564	-1.84239		III	II	847.622	37.596
YLR344W	RPL26A	Ribosomal 60S subunit protein L26A; binds to 5.8S rRNA; non-essential even when paralog is also deleted; deletion has minimal affections on ribosome biosynthesis; homologous to mammalian ribosomal protein L26 and bacterial L24; RPL26A has a paralog, RPL26B, that arose from the whole genome duplication	II	7.64004	6.67184	5.78972	4.4085	3.46687	2.20031	0.252628	-2.30103	II	II	I	558.553	24.7744
YKL014C	URB1	Protein required for the normal accumulation of 25S and 5.8S rRNAs; nucleolar protein; associated with the 27SA2 pre-ribosomal particle; proposed to be involved in the biogenesis of the 60S ribosomal subunit	II	4.84847	3.9348	3.02526	2.51318	1.62425	1.37909	0.13597	-1.30103		III		100.437	4.45486
YOR145C	PNO1	Essential nucleolar protein required for pre-18S rRNA processing; interacts with Dim1p, an 18S rRNA dimethyltransferase, and also with Nob1p, which is involved in proteasome biogenesis; contains a KH domain	II	5.38718	4.55333	3.86814	3.31346	2.4746	1.08921	-0.22908	-1.02892		III		206.336	9.15198
YDL184C	RPL41A	Ribosomal 60S subunit protein L41A; comprises only 25 amino acids; rpl41a rpl41b double null mutant is viable; homologous to mammalian ribosomal protein L41, no bacterial homolog; RPL41A has a paralog, RPL41B, that arose from the whole genome duplication	II	4.78278	4.13731	3.22049	2.32036	1.69842	0.613128	0.168303	-0.243186	III	II	II	2977.47	132.065
YJR123W	RPS5	Protein component of the small (40S) ribosomal subunit; least basic of non-acidic ribosomal proteins; phosphorylated in vivo; essential for viability; homologous to mammalian ribosomal protein S5 and bacterial S7	II	7.41484	6.12903	4.99483	3.71608	2.62425	1.87399	0.756814	0.157606			II	6196.27	274.833
YNL213C	RRG9	Protein of unknown function; null mutant lacks mitochondrial DNA and cannot grow on glycerol; the authentic, non-tagged protein is detected in highly purified mitochondria in high-throughput studies	II	5.92023	5.41251	4.83564	3.91461	3.40646	2.4541	0.806607	-0.602608	II	II		34.577	1.53365
YLR172C	DPH5	Methyltransferase required for synthesis of diphthamide; diphthamide is a modified histidine residue of translation elongation factor 2 (Eft1p or Eft2p); not essential for viability; GFP-Dph5p fusion protein localizes to the cytoplasm	II	5.2744	4.48563	3.65799	2.51528	1.71568	0.020896	-0.301032	-0.564067		III	IV	221.536	9.82616
YBR106W	PHO88	Probable membrane protein; involved in phosphate transport; role in the maturation of secretory proteins; pho88 pho86 double null mutant exhibits enhanced synthesis of repressible acid phosphatase at high inorganic phosphate concentrations	II	6.34862	5.36765	4.74298	3.83072	3.0779	1.37516	0.636429	-1.27182		III	II	934.533	41.4509
YJR132W	NMD5	Karyopherin; a carrier protein involved in nuclear import of proteins; importin beta homolog	II	5.36091	4.36951	3.60608	2.9539	1.67389	0.503827	-0.934334	-1.13402		III		76.7928	3.40612
YHR143W-A	RPC10	RNA polymerase subunit ABC10-alpha, found in RNA pol I, II, and III; relocalizes from nucleolus to cytoplasm upon DNA replication stress	II	4.51859	4.04802	3.64617	3.15318	2.58657	1.57627	-0.132077	-1.80007				150.751	6.68649
YDR201W	SPC19	Essential subunit of the Dam1 complex (aka DASH complex); complex couples kinetochores to the force produced by MT depolymerization thereby aiding in chromosome segregation; also localized to nuclear side of spindle pole body	II	6.68169	5.76563	5.05523	3.70156	2.54142	0.444759	-1.56407		IV	III	I	28.5783	1.26758
YDR172W	SUP35	Translation termination factor eRF3; has a role in mRNA deadenylation and decay; altered protein conformation creates the [PSI(+)] prion that modifies cellular fitness, alters translational fidelity by affecting reading frame selection, and results in a nonsense suppressor phenotype; many stress-response genes are repressed in the presence of [PSI(+)]	II	5.06638	4.65354	4.18834	3.53389	2.77293	2.20292	1.46161	0.044313				342.21	15.1786
YLR305C	STT4	Phosphatidylinositol-4-kinase; functions in the Pkc1p protein kinase pathway; required for normal vacuole morphology, cell wall integrity, and actin cytoskeleton organization	II	5.92587	5.11014	4.00247	2.52425	0.919489	-0.273959				III	IV	47.9769	2.128
YGR204W	ADE3	Cytoplasmic trifunctional enzyme C1-tetrahydrofolate synthase; involved in single carbon metabolism and required for biosynthesis of purines, thymidylate, methionine, and histidine; null mutation causes auxotrophy for adenine and histidine	II	6.67461	6.11581	5.61423	4.85915	4.09915	2.8761	0.806607	-1.27182		III	IV	202.689	8.99021
YGR266W		Protein of unknown function; predicted to contain a single transmembrane domain; mutant has increased aneuploidy tolerance; localized to both the mitochondrial outer membrane and the plasma membrane; protein abundance increases in response to DNA replication stress	II	5.67351	4.79083	3.92683	2.85756	1.96189	0.720933	-1.07864	-3.88599		II		32.9422	1.46114
YJR104C	SOD1	Cytosolic copper-zinc superoxide dismutase; detoxifies superoxide; stabilizes Yck1p and Yck2p kinases in glucose to repress respiration; phosphorylated by Dun1p, enters nucleus under oxidative stress to promote transcription of stress response genes; human ortholog SOD1 implicated in ALS and complements yeast null; abundance increases under DNA replication stress and during exposure to boric acid…	II	5.59498	4.87674	4.25987	3.6478	2.13789	0.939285	-0.71607	-0.885995	II	II	II	1154.46	51.2058
YMR161W	HLJ1	Co-chaperone for Hsp40p; anchored in the ER membrane; with its homolog Ydj1p promotes ER-associated protein degradation (ERAD) of integral membrane substrates; similar to E. coli DnaJ	II	5.96696	5.26793	4.7437	4.00355	2.46844	1.1683	-0.677249	-2.88599		II	II	42.955	1.90525
YPL012W	RRP12	Protein required for export of the ribosomal subunits; associates with the RNA components of the pre-ribosomes; has a role in nuclear import in association with Pse1p; also plays a role in the cell cycle and the DNA damage response; contains HEAT-repeats	II	5.49702	5.04246	4.68654	4.16771	3.53565	2.74561	1.65936	0.189463		III		188.084	8.34239
YPR108W	RPN7	Essential non-ATPase regulatory subunit of the 26S proteasome; similar to another S. cerevisiae regulatory subunit, Rpn5p, as well as to mammalian proteasome subunits	II	7.26783	6.37174	5.76515	4.78668	3.62978	1.40712	0.272595	-1.80007		III	III	148.968	6.60742
YIL127C	RRT14	Putative protein of unknown function; identified in a screen for mutants with decreased levels of rDNA transcription; green fluorescent protein (GFP)-fusion protein localizes to the nucleolus; predicted to be involved in ribosome biogenesis	II	5.85198	4.62432	3.8414	2.97825	1.86135	0.77092	-1.30103	-2.88599		III	II	85.5724	3.79554
YDL112W	TRM3	2'-O-ribose methyltransferase; catalyzes the ribose methylation of the guanosine nucleotide at position 18 of tRNAs	II	5.84122	5.20291	4.25584	3.33634	2.1917	0.620937	-1.02892	-2.24319		III	IV	81.2863	3.60543
YLR068W	FYV7	Essential protein required for maturation of 18S rRNA; required for survival upon exposure to K1 killer toxin	II	5.55247	5.06377	4.6988	4.21486	3.83747	2.96012	1.99275	0.97718		II		17.7979	0.78942
YDR324C	UTP4	Subunit of U3-containing 90S preribosome and SSU processome complexes; involved in production of 18S rRNA and assembly of small ribosomal subunit; member of t-Utp subcomplex involved with transcription of 35S rRNA transcript; Small Subunit processome is also known as SSU processome	II	5.95791	5.12805	4.2386	3.09202	1.95436	0.388271	-1.42894	-3.88599		III		97.7087	4.33384
YLR293C	GSP1	Ran GTPase; GTP binding protein (mammalian Ranp homolog) involved in the maintenance of nuclear organization, RNA processing and transport; regulated by Srm1p, Rna1p, Yrb1p, Yrb2p, Yrp4p, Yrb30p, Cse1p and Kap95p; GSP1 has a paralog, GSP2, that arose from the whole genome duplication	II	7.54066	6.38681	5.38198	4.31578	3.25547	1.94506	0.756814	-0.301032		II	I	1642.32	72.8445
YBL047C	EDE1	Scaffold protein involved in the formation of early endocytic sites; putative regulator of cytokinesis; homo-oligomerization is required for localization to and organization of endocytic sites; has a network of interactions with other endocytic proteins; binds membranes in a ubiquitin-dependent manner; may also bind ubiquitinated membrane-associated proteins; interacts with Cmk2 and functions ups…	II	5.97402	5.22888	4.35126	3.01196	2.1096	0.462251	-1.84239	-2.30103		III	III	109.683	4.86496
YFL034C-A	RPL22B	Ribosomal 60S subunit protein L22B; homologous to mammalian ribosomal protein L22, no bacterial homolog; RPL22B has a paralog, RPL22A, that arose from the whole genome duplication	II	6.6295	5.86561	4.89641	3.92549	2.34885	0.87447	-1.75896	-2.80007	IV	III	II	129.169	5.72925
YNL067W-B		Putative protein of unknown function	II	5.09375	4.45685	3.58013	2.71622	1.79923	0.989296	0.123405	-1.42894		II		#N/A	#N/A
YPR041W	TIF5	Translation initiation factor eIF5; functions both as a GTPase-activating protein to mediate hydrolysis of ribosome-bound GTP and as a GDP dissociation inhibitor to prevent recycling of eIF2	II	5.23703	4.42477	3.82857	3.22358	2.40938	1.62425	-0.160546	-0.934334				260.419	11.5508
YBL079W	NUP170	Subunit of the inner ring of the nuclear pore complex (NPC); contributes to NPC assembly and nucleocytoplasmic transport; both Nup170p and NUP157p are similar to human Nup155p; NUP170 has a paralog, NUP157, that arose from the whole genome duplication	II	5.53519	4.58541	4.12025	2.89507	1.49173	0.486835	0.340379	-2.24319		II	IV	80.7312	3.58081
YOR243C	PUS7	Pseudouridine synthase; catalyzes pseudouridylation at positions 35 and 56 in U2 snRNA, position 50 in 5S rRNA, position 13 in cytoplasmic tRNAs, and position 35 in pre-tRNA(Tyr); also pseudouridylates some mRNAs; relocates from nucleus to cytoplasm during heat shock and differentially modifies some mRNAs during heat shock; conserved in archaea, vertebrates, and some bacteria	II	6.43104	5.69177	4.62182	3.58198	2.38173	0.763884	-1.30103			II		118.569	5.25911
YLR325C	RPL38	Ribosomal 60S subunit protein L38; homologous to mammalian ribosomal protein L38, no bacterial homolog	II	6.85686	5.47688	4.32634	3.37187	2.06492	1.21185	0.22215	-1.05356	III	II	I	3324.77	147.469
YOL041C	NOP12	Nucleolar protein involved in pre-25S rRNA processing; also involved in biogenesis of large 60S ribosomal subunit; contains an RNA recognition motif (RRM); binds to Ebp2; similar to Nop13p and Nsr1p	II	6.48152	5.79053	5.21558	4.52691	3.62702	2.67285	1.43462	0.123405		II		185.769	8.23974
YDR091C	RLI1	Essential Fe-S protein; required for ribosome biogenesis, translation initiation/termination; facilitates binding of multifactor complex (MFC) of initiation factors to small ribosomal subunit; Dom34-Hbs1 complex and Rli1p work in dissociating inactive ribosomes, thereby facilitating translation restart; forms complex with Lto1p and Yae1p; dependency on ROS-labile FeS clusters, activity in nuclear…	II	6.32876	5.54909	4.89013	4.10194	3.28616	2.21032	0.123405	-1.21511		III	II	234.747	10.4121
YJR070C	LIA1	Deoxyhypusine hydroxylase; HEAT-repeat containing metalloenzyme that catalyzes hypusine formation; binds to and is required for the modification of Hyp2p (eIF5A); complements S. pombe mmd1 mutants defective in mitochondrial positioning; protein abundance increases in response to DNA replication stress	II	5.68011	4.75019	3.79713	3.00259	2.05748	0.604112	-0.160546	-0.160546	III		II	418.73	18.5726
YNL004W	HRB1	Poly(A+) RNA-binding protein; key surveillance factor for the selective export of spliced mRNAs from the nucleus to the cytoplasm; preference for intron-containing genes; similar to Npl3p; HRB1 has a paralog, GBP2, that arose from the whole genome duplication	II	6.64254	5.97672	5.38492	4.69733	3.82807	2.36555	0.444759	-0.546468		II		45.0439	1.99791
YER026C	CHO1	Phosphatidylserine synthase; functions in phospholipid biosynthesis; catalyzes the reaction CDP-diaclyglycerol + L-serine = CMP + L-1-phosphatidylserine, transcriptionally repressed by myo-inositol and choline	II	5.9866	5.15253	4.53903	3.6923	3.03655	2.47364	0.178922	-2.88599	III	III	III	139.577	6.19088
YLL040C	VPS13	Protein involved in prospore membrane morphogenesis; heterooligomeric or homooligomeric complex; peripherally associated with membranes; involved in sporulation, vacuolar protein sorting, prospore membrane formation during sporulatoin, and protein-Golgi retention; homologous to human CHAC and COH1 which are involved in chorea acanthocytosis and Cohen syndrome, respectively	II	6.33307	5.56443	4.23462	2.61675	1.02679	0.371222	-1.56407	-1.886		IV		41.7966	1.85387
YDL140C	RPO21	RNA polymerase II largest subunit B220; part of central core; phosphorylation of C-terminal heptapeptide repeat domain regulates association with transcription and splicing factors; similar to bacterial beta-prime	II	5.4642	4.74345	4.01441	3.34278	2.46595	1.4746	0.01915	-2.88599		III		142.982	6.3419
YOR259C	RPT4	ATPase of the 19S regulatory particle of the 26S proteasome; one of six ATPases of the regulatory particle; involved in degradation of ubiquitinated substrates; contributes preferentially to ERAD; required for spindle pole body duplication; mainly nuclear localization	II	6.01647	5.4214	4.85428	3.82697	3.27663	2.00043	1.65063	0.042595		III		149.416	6.62729
YKL113C	RAD27	5' to 3' exonuclease, 5' flap endonuclease; required for Okazaki fragment processing and maturation, for long-patch base-excision repair and large loop repair (LLR), ribonucleotide excision repair; member of the S. pombe RAD2/FEN1 family; relocalizes to the cytosol in response to hypoxia	II	6.51404	5.88948	5.3008	4.64349	3.82747	2.38666	-0.185555	-1.30103		II		65.7079	2.91445
YGR081C	SLX9	Protein required for pre-rRNA processing; associated with the 90S pre-ribosome and 43S small ribosomal subunit precursor; interacts with U3 snoRNA; deletion mutant has synthetic fitness defect with an sgs1 deletion mutant	II	5.30169	4.65466	4.35762	3.69216	3.13572	1.96098	0.636429	-0.093231		III	II	99.2968	4.40427
YKR056W	TRM2	tRNA methyltransferase; 5-methylates the uridine residue at position 54 of tRNAs and may also have a role in tRNA stabilization or maturation; endo-exonuclease with a role in DNA repair	II	7.54115	6.58972	5.66336	4.33599	3.13572	1.14603	-0.564067	-1.07864	IV	III	I	76.813	3.40702
YOL126C	MDH2	Cytoplasmic malate dehydrogenase; one of three isozymes that catalyze interconversion of malate and oxaloacetate; involved in the glyoxylate cycle and gluconeogenesis during growth on two-carbon compounds; interacts with Pck1p and Fbp1	II	5.25991	4.52714	3.83517	2.92604	1.85425	0.705241	-1.56407		II	II		75.8593	3.36471
YKL165C	MCD4	Protein involved in GPI anchor synthesis; multimembrane-spanning protein that localizes to the endoplasmic reticulum; highly conserved among eukaryotes; GPI stands for glycosylphosphatidylinositol	II	5.35431	4.59066	3.93992	2.61168	1.70047	1.11708	-1.46156	-2.24319		IV		48.4366	2.14839
YER074W	RPS24A	Protein component of the small (40S) ribosomal subunit; homologous to mammalian ribosomal protein S24, no bacterial homolog; RPS24A has a paralog, RPS24B, that arose from the whole genome duplication	II	4.96642	3.99757	3.51663	2.64766	1.84044	0.951722	-0.363571	-1.886			II	798.123	35.4005
YCL054W	SPB1	AdoMet-dependent methyltransferase; involved in rRNA processing and 60S ribosomal subunit maturation; methylates G2922 in the tRNA docking site of the large subunit rRNA and in the absence of snR52, U2921; suppressor of PAB1 mutants	II	5.41938	5.02622	4.73954	4.43477	3.95833	3.10759	1.03092	0.01915		II		84.0936	3.72995
YLR388W	RPS29A	Protein component of the small (40S) ribosomal subunit; homologous to mammalian ribosomal protein S29 and bacterial S14; RPS29A has a paralog, RPS29B, that arose from the whole genome duplication	II	6.81871	5.87362	5.16924	4.30057	2.78566	1.68303	-0.410556	-1.886		II	II	1995.99	88.5313
YGL070C	RPB9	RNA polymerase II subunit B12.6; contacts DNA; mutations affect transcription start site selection and fidelity of transcription	II	6.34108	5.65915	4.98831	3.9765	3.4273	1.99787	-0.041188	-0.394724		II	II	89.8106	3.98352
YBR061C	TRM7	2'-O-ribose methyltransferase; methylates the 2'-O-ribose of tRNA-Phe, tRNA-Trp, and tRNA-Leu at positions C32 and N34 of tRNA anticodon loop; crucial biological role likely modification of tRNA-Phe; interacts with Trm732p and Rtt10p in 2'-O-methylation of C32 and N34 substrate tRNAs, respectively; yeast null mutant can be functionally complemented by human FTSJ1, mutations in which have been imp…	II	6.3132	5.79821	5.21364	4.35076	2.99854	1.83759	-0.158568	-2.30103		II	III	72.7817	3.22821
YHR058C	MED6	Subunit of the RNA polymerase II mediator complex; associates with core polymerase subunits to form the RNA polymerase II holoenzyme; essential for transcriptional regulation; protein abundance increases in response to DNA replication stress	II	5.98043	5.63436	5.1792	4.43352	3.86074	2.77617	1.94506	-0.529081		III	II	31.3631	1.3911
YNL106C	INP52	Polyphosphatidylinositol phosphatase; dephosphorylates a number of phosphatidylinositol phosphates (PtdInsPs, PIPs) to PI; involved in endocytosis; hyperosmotic stress causes translocation to actin patches; synaptojanin-like protein with a Sac1 domain; INP52 has a paralog, INP53, that arose from the whole genome duplication	II	5.01011	4.20662	3.48624	2.62202	1.94194	1.45596	-0.21511			III		15.6854	0.69572
YJL010C	NOP9	Essential subunit of U3-containing 90S preribosome; involved in production of 18S rRNA and assembly of small ribosomal subunit; also part of pre-40S ribosome and required for its export into cytoplasm; binds RNA and contains pumilio domain	II	6.67226	5.84717	5.01762	4.10034	3.11534	1.89023	-0.86403			III		96.2502	4.26915
YKL068W	NUP100	FG-nucleoporin component of central core of the nuclear pore complex; contributes directly to nucleocytoplasmic transport and maintenance of the nuclear pore complex (NPC) permeability barrier and is involved in gene tethering at the nuclear periphery; NUP100 has a paralog, NUP116, that arose from the whole genome duplication	II	6.22968	5.64256	4.80946	3.916	2.75629	1.15681	-1.84239	-3.88599		III	II	70.1991	3.11366
YGR047C	TFC4	Subunit of RNA polymerase III transcription initiation factor complex; one of six subunits of RNA polymerase III transcription initiation factor complex (TFIIIC); part of the TauA domain of TFIIIC that binds BoxA DNA promoter sites of tRNA and similar genes; has TPR motifs; human homolog is TFIIIC-102	II	4.64102	4.10831	3.67941	3.24432	2.28739	1.80559	1.18342	-1.84239				21.5981	0.957977
YDR064W	RPS13	Protein component of the small (40S) ribosomal subunit; homologous to mammalian ribosomal protein S13 and bacterial S15	II	6.07418	5.29794	4.50108	3.49995	2.4507	1.34649	0.479534	-0.842394		IV	II	1994.6	88.47
YPR010C	RPA135	RNA polymerase I second largest subunit A135	II	6.00321	5.02968	4.22652	3.11437	1.67125	0.933025	-1.24319			II	III	339.087	15.0401
YOR182C	RPS30B	Protein component of the small (40S) ribosomal subunit; homologous to mammalian ribosomal protein S30, no bacterial homolog; RPS30B has a paralog, RPS30A, that arose from the whole genome duplication; protein abundance increases in response to DNA replication stress	II	4.6734	3.91555	3.17229	2.43684	1.70524	0.778954	0.044313	-0.71607			I	1191.25	52.8374
YML028W	TSA1	Thioredoxin peroxidase; acts as both ribosome-associated and free cytoplasmic antioxidant; self-associates to form high-molecular weight chaperone complex under oxidative stress; chaperone activity essential for growth in zinc deficiency; required for telomere length maintenance; protein abundance increases, forms cytoplasmic foci during DNA replication stress; TSA1 has a paralog, TSA2, that aros…	II	6.43893	5.48432	4.23942	3.17907	2.41995	0.674446	-0.273959		III	III	III	2142.28	95.0199
YJR069C	HAM1	Nucleoside triphosphate pyrophosphohydrolase; active against various substrates including ITP, dITP and XTP; mediates exclusion of non canonical purines, pyrimidines from dNTP pools; functions with YJL055W to mediate resistance to 5-FU; specifically reduces the incorporation of 5-FU into RNA without affecting uptake or incorporation of uracil into RNA; protein abundance increases in response to D…	II	6.49449	5.46241	4.82198	4.03428	3.14467	2.04055	0.178922	-1.21511		II		124.223	5.50988
YER156C		Putative protein of unknown function; interacts with Hsp82p and copurifies with Ipl1p; expression is copper responsive and downregulated in strains deleted for MAC1, a copper-responsive transcription factor; similarity to mammalian MYG1	II	5.4315	4.74454	3.91782	2.84118	1.93975	0.964961	-1.07864	-3.88599		II		150.007	6.6535
YGR116W	SPT6	Nucleosome remodeling protein; functions in various aspects of transcription, chromatin maintenance, and RNA processing; required for the maintenance of chromatin structure during transcription in order to inhibit transcription from promoters within the coding region; required for H3K36 trimethylation but not dimethylation by Set2p	II	6.59673	5.75119	4.99217	4.32346	2.97887	2.29156	-0.800073	-2.71898		II	III	149.15	6.61549
YFL001W	DEG1	tRNA:pseudouridine synthase; introduces pseudouridines at position 38 or 39 in tRNA; also responsible for pseudouracil modification of some mRNAs; important for maintenance of translation efficiency and normal cell growth, localizes to both the nucleus and cytoplasm; non-essential for viability	II	4.90712	4.52089	4.17787	3.7428	3.26228	2.77442	1.19548	0.407792		III		45.1196	2.00127
YBL039C	URA7	Major CTP synthase isozyme (see also URA8); catalyzes the ATP-dependent transfer of the amide nitrogen from glutamine to UTP, forming CTP, the final step in de novo biosynthesis of pyrimidines; involved in phospholipid biosynthesis; capable of forming cytoplasmic filaments termed cytoophidium, especially during conditions of glucose depletion; URA7 has a paralog, URA8, that arose from the whole g…	II	5.90675	5.49193	4.88359	4.17929	3.22742	1.93256	0.443458	-1.49493		III		377.14	16.7279
YNL209W	SSB2	Cytoplasmic ATPase that is a ribosome-associated molecular chaperone; functions with J-protein partner Zuo1p; may be involved in the folding of newly-synthesized polypeptide chains; member of the HSP70 family; SSB2 has a paralog, SSB1, that arose from the whole genome duplication	II	6.16392	5.30399	4.2543	2.91949	1.57567	0.406457	-1.52908	-3.88599	IV		IV	1328.17	58.9104
YOR341W	RPA190	RNA polymerase I largest subunit A190	II	6.90254	6.0299	4.89622	3.27983	2.41388	0.847116	-1.21511	-2.71898		III		334.051	14.8167
YKL216W	URA1	Dihydroorotate dehydrogenase; catalyzes the fourth enzymatic step in the de novo biosynthesis of pyrimidines, converting dihydroorotic acid into orotic acid	II	5.98274	5.18691	4.3074	3.74138	2.3622	0.007282				III		557.26	24.7171
YIL133C	RPL16A	Ribosomal 60S subunit protein L16A; N-terminally acetylated, binds 5.8 S rRNA; transcriptionally regulated by Rap1p; homologous to mammalian ribosomal protein L13A and bacterial L13; RPL16A has a paralog, RPL16B, that arose from the whole genome duplication; protein abundance increases in response to DNA replication stress	II	5.81815	4.76811	4.09526	3.11989	2.2107	0.920425	-0.243186	-1.52908			II	1163.49	51.6062
YML026C	RPS18B	Protein component of the small (40S) ribosomal subunit; homologous to mammalian ribosomal protein S18 and bacterial S13; RPS18B has a paralog, RPS18A, that arose from the whole genome duplication; protein abundance increases in response to DNA replication stress	II	5.8651	4.67954	3.85744	2.81489	1.9893	0.901315	0.389623	-0.71607			IV	1271.62	56.4022
YDR412W	RRP17	Component of the pre-60S pre-ribosomal particle; required for cell viability under standard (aerobic) conditions but not under anaerobic conditions; exonuclease required for 5' end processing of pre-60S ribosomal RNA	II	4.65671	3.59096	2.71595	2.1402	1.72711	1.26191	0.340379	-0.718981		IV	II	57.1145	2.5333
YPL235W	RVB2	ATP-dependent DNA helicase, also known as reptin; member of the AAA+ and RuvB protein families, similar to Rvb1p; conserved component of multiple complexes including the INO80 complex, the Swr1 complex, and the R2TP complex (Rvb1-Rvb2-Tah1-Pih1); involved in multiple processes such as chromatin remodeling, box C/D snoRNP assembly, and RNA polymerase II assembly	II	5.47882	4.76978	4.2118	3.33889	2.77592	1.60805	0.681931	0.134358		IV	IV	127.2	5.64191
YLR419W		Putative helicase with limited sequence similarity to human Rb protein; the authentic, non-tagged protein is detected in highly purified mitochondria in high-throughput studies; YLR419W is not an essential gene	II	6.25659	5.67481	4.94977	3.97727	2.53462	1.62813	0.03092	-2.80007		II		36.0346	1.5983
YIL128W	MET18	Component of cytosolic iron-sulfur protein assembly (CIA) machinery; acts at a late step of Fe-S cluster assembly; forms the CIA targeting complex with Cia1p and Cia2p that directs Fe-S cluster incorporation into a subset of proteins involved in methionine biosynthesis, DNA replication and repair, transcription, and telomere maintenance; ortholog of human MMS19	II	4.81091	4.21262	3.81401	3.2692	2.91267	1.91267	0.783862	-2.18757		IV		43.2619	1.91887
YDR325W	YCG1	Subunit of the condensin complex; required for establishment and maintenance of chromosome condensation, chromosome segregation and chromatin binding of the condensin complex; required for clustering of tRNA genes at the nucleolus; required for replication slow zone (RSZ) breakage following Mec1p inactivation	II	6.50331	5.74883	5.02684	4.27205	3.50218	1.93256	1.15063	-1.42894		III	II	26.037	1.15486
YCR051W		Putative protein of unknown function; green fluorescent protein (GFP)-fusion protein localizes to the cytoplasm and nucleus; contains ankyrin (Ank) repeats; YCR051W is not an essential gene	II	6.73556	5.96019	5.28779	4.26486	3.45552	1.30831	-0.564067	-1.30103		II		111.262	4.935
YDR308C	SRB7	Subunit of the RNA polymerase II mediator complex; associates with core polymerase subunits to form the RNA polymerase II holoenzyme; essential for transcriptional regulation; target of the global repressor Tup1p	II	5.61342	4.8944	4.34506	3.76904	2.92808	2.12615	1.47396	-1.27182	III	II	II	52.7011	2.33754
YJL020C	BBC1	Protein possibly involved in assembly of actin patches; interacts with an actin assembly factor Las17p and with the SH3 domains of Type I myosins Myo3p and Myo5p; localized predominantly to cortical actin patches	II	5.60728	4.9363	4.15661	3.3505	2.10919	0.114005	-0.301032			III		53.1192	2.35608
YER043C	SAH1	S-adenosyl-L-homocysteine hydrolase; catabolizes S-adenosyl-L-homocysteine which is formed after donation of the activated methyl group of S-adenosyl-L-methionine (AdoMet) to an acceptor; regulates cellular lipid homoeostasis by regulating phosphatidylcholine(PC)synthesis and triacylglycerol (TG) levels	II	5.9218	4.78497	3.40327	2.4948	1.43084	0.66048	-0.696529	-1.886	III	IV	III	1113.29	49.3794
YCR003W	MRPL32	Mitochondrial ribosomal protein of the large subunit; protein abundance increases in response to DNA replication stress	II	6.03137	5.18088	4.63668	3.72969	2.64355	1.08357	0.311717	-0.584536	II	III	IV	39.4864	1.75141
YPL187W	MF(ALPHA)1	Mating pheromone alpha-factor, made by alpha cells; interacts with mating type a cells to induce cell cycle arrest and other responses leading to mating; also encoded by MF(ALPHA)2, although MF(ALPHA)1 produces most alpha-factor; MF(ALPHA)1 has a paralog, MF(ALPHA)2, that arose from the whole genome duplication	II	6.10349	5.05421	4.40285	3.57887	2.79086	1.87821	1.31314	0.168303	III	II	I	1924.21	85.3475
YGR234W	YHB1	Nitric oxide oxidoreductase; flavohemoglobin involved in nitric oxide detoxification; plays a role in the oxidative and nitrosative stress responses; protein increases in abundance and relocalizes from nucleus to cytoplasmic foci upon DNA replication stress	II	6.5637	5.50288	4.30863	2.92831	2.16029	0.951722	0.03092	-0.445159		II	I	458.786	20.3493
YDR212W	TCP1	Alpha subunit of chaperonin-containing T-complex; complex mediates protein folding in the cytosol; involved in actin cytoskeleton maintenance; overexpression in neurons suppresses formation of pathogenic conformations of huntingtin protein	II	6.36712	5.65729	4.79812	4.07232	3.17057	2.02254	0.777922	0.220631		IV		287.029	12.7311
YBR154C	RPB5	RNA polymerase subunit ABC27; common to RNA polymerases I, II, and III; contacts DNA and affects transactivation	II	5.41423	4.64645	3.97043	3.42144	2.76767	1.35657	-0.410556	-2.24319		IV		315.842	14.0091
YDR050C	TPI1	Triose phosphate isomerase, abundant glycolytic enzyme; mRNA half-life is regulated by iron availability; transcription is controlled by activators Reb1p, Gcr1p, and Rap1p through binding sites in the 5' non-coding region; inhibition of Tpi1p activity by PEP (phosphoenolpyruvate) stimulates redox metabolism in respiring cells; E104D mutation in human homolog TPI1 causes a rare autosomal disease; …	II	6.36836	5.3984	4.45469	3.68783	2.71703	1.60921	0.914083	0.168303			IV	4825.32	214.026
YER056C	FCY2	Purine-cytosine permease; mediates purine (adenine, guanine, and hypoxanthine) and cytosine accumulation; relative distribution to the vacuole increases upon DNA replication stress	II	6.16928	5.46213	4.44739	3.21772	2.50718	0.900367	-0.779369	-2.88599		III	II	230.405	10.2195
YLL014W	EMC6	Member of conserved ER transmembrane complex; required for efficient folding of proteins in the ER; null mutant displays induction of the unfolded protein response; homologous to worm F33D4.7/EMC-6, fly CG11781, human TMEM93	II	5.3008	4.5963	3.47292	2.28566	1.42639	0.322751	-0.145262	-0.842394		III		152.576	6.76744
YDL122W	UBP1	Ubiquitin-specific protease; removes ubiquitin from ubiquitinated proteins; cleaves at the C terminus of ubiquitin fusions irrespective of their size; capable of cleaving polyubiquitin chains	II	6.0246	5.34668	4.58091	3.88027	2.30482	0.798726	-0.842394	-2.18757		III		100.228	4.44557
YNL313C	EMW1	Essential conserved protein with a role in cell wall integrity; contains six TPR (tetratricopeptide repeat) domains clustered in the C-terminal region; conditional mutant is suppressed by overexpression of GFA1; protein abundance increases in response to DNA replication stress	II	6.05097	5.4218	4.80773	3.84961	2.90357	2.06036	1.00131	-2.24319		III		82.2612	3.64867
YKL156W	RPS27A	Protein component of the small (40S) ribosomal subunit; homologous to mammalian ribosomal protein S27, no bacterial homolog; RPS27A has a paralog, RPS27B, that arose from the whole genome duplication; protein abundance increases in response to DNA replication stress	II	5.62078	4.87814	4.20087	3.44362	2.38895	1.38895	0.134358	-0.445159		III	I	500.012	22.1779
YPL240C	HSP82	Hsp90 chaperone; redundant in function with Hsc82p; required for pheromone signaling, negative regulation of Hsf1p; docks with Tom70p for mitochondrial preprotein delivery; promotes telomerase DNA binding, nucleotide addition; protein abundance increases in response to DNA replication stress; contains two acid-rich unstructured regions that promote solubility of chaperone-substrate complexes; HSP…	II	6.17175	5.47292	4.74125	3.05172	1.78141	1.52602	-0.511902	-0.821078	II	III		175.773	7.79636
YBR049C	REB1	RNA polymerase I enhancer binding protein; DNA binding protein that binds to genes transcribed by both RNA polymerase I and RNA polymerase II; required for termination of RNA polymerase I transcription; Reb1p bound to DNA acts to block RNA polymerase II readthrough transcription	II	3.37713	2.71284	1.94598	0.907713	0.24254	-0.71607	-1.886				III	64.2892	2.85153
YGL029W	CGR1	Protein involved in nucleolar integrity and processing of pre-rRNA; has a role in processing rRNA for the 60S ribosome subunit; transcript is induced in response to cytotoxic stress but not genotoxic stress; relocalizes from nucleus to nucleolus upon DNA replication stress	II	3.38649	2.91996	2.24179	0.777922	0.262646	-0.271819	-1.84239	-2.88599				79.6564	3.53313
YDL178W	DLD2	D-lactate dehydrogenase; located in the mitochondrial matrix	II	3.50944	2.83734	2.45693	1.69418	0.668037	0.055881	-1.07864	-2.30103				44.5469	1.97586
YCL027W	FUS1	Membrane protein localized to the shmoo tip; required for cell fusion; expression regulated by mating pheromone; proposed to coordinate signaling, fusion, and polarization events required for fusion; potential Cdc28p substrate	II	5.49382	4.73747	3.49524	2.98454	0.157606	-0.546468	-1.27182	-2.88599		III	III	24.1868	1.0728
YDR120C	TRM1	tRNA methyltransferase; two forms of protein are made by alternative translation starts; localizes to both nucleus and mitochondrion to produce modified base N2,N2-dimethylguanosine in tRNAs in both compartments; nuclear Trm1p is evenly distributed around inner nuclear membrane in WT, but mislocalizes as puncta near ER-nucleus junctions in spindle pole body (SPB) mutants; both Trm1p inner nuclear…	II	3.81841	3.09446	2.27259	1.74561	0.995317	-1.21511	-3.71898	-3.71898			IV	101.92	4.52065
YGR192C	TDH3	Glyceraldehyde-3-phosphate dehydrogenase (GAPDH), isozyme 3; involved in glycolysis and gluconeogenesis; tetramer that catalyzes the reaction of glyceraldehyde-3-phosphate to 1,3 bis-phosphoglycerate; detected in the cytoplasm and cell wall; GAPDH-derived antimicrobial peptides secreted by S. cerevisiae are active against a wide variety of wine-related yeasts and bacteria; binds AU-rich RNA	II	4.26825	3.76274	3.10083	2.23851	1.43839	0.311717	-1.886	-2.88599	IV	IV	III	14607.9	647.928
YIL126W	STH1	ATPase component of the RSC chromatin remodeling complex; required for expression of early meiotic genes; promotes base excision repair in chromatin; essential helicase-related protein homologous to Snf2p	II	4.13885	3.07385	2.12696	0.887477	0.134358	-0.566687	-1.13402				II	68.9613	3.05876
YNL007C	SIS1	Type II HSP40 co-chaperone that interacts with the HSP70 protein Ssa1p; shuttles between cytosol and nucleus; mediates delivery of misfolded proteins into the nucleus for degradation; involved in proteasomal degradation of misfolded cytosolic proteins; protein abundance increases in response to DNA replication stress; polyQ aggregates sequester Sis1p and interfere with clearance of misfolded prot…	II	5.02706	4.01567	3.09446	2.04055	0.398736	-1.27182	-1.886	-2.88599			III	132.138	5.86093
YHL002W	HSE1	Subunit of the endosomal Vps27p-Hse1p complex; complex is required for sorting of ubiquitinated membrane proteins into intralumenal vesicles prior to vacuolar degradation, as well as for recycling of Golgi proteins and formation of lumenal membranes	II	3.36172	2.2151	2.01235	1.90902	0.783862	0.340379	-2.30103			IV		39.8325	1.76676
YDR129C	SAC6	Fimbrin, actin-bundling protein; cooperates with calponin/transgelin Scp1p in organization and maintenance of actin cytoskeleton; relocalizes from plasma membrane to cytoplasm upon DNA replication stress; human homologs PLS3 and LCP1 implicated in spinocerebellar ataxia type 2 (SCA2) can each complement yeast null mutant	II	5.78297	4.33702	3.37366	2.46531	-0.07864	-3.88599	-3.88599			IV	I	199.533	8.85024
YJL146W	IDS2	Protein involved in modulation of Ime2p activity during meiosis; appears to act indirectly to promote Ime2p-mediated late meiotic functions; found in growing cells and degraded during sporulation	II	3.52691	2.86202	2.1917	0.681931	0.538442	0.220631	-3.88599	-3.88599		IV		13.1404	0.582839
YBR011C	IPP1	Cytoplasmic inorganic pyrophosphatase (PPase); homodimer that catalyzes the rapid exchange of oxygens from Pi with water, highly expressed and essential for viability, active-site residues show identity to those from E. coli PPase	II	4.60834	3.60805	2.64737	1.83038	0.114005	-1.30103	-2.30103		IV	IV	IV	1566.28	69.4721
YGL122C	NAB2	Nuclear polyadenylated RNA-binding protein; required for nuclear mRNA export and poly(A) tail length control; binds nuclear pore protein Mlp1p; involved in forming export-competent mRNPs in the nucleus; autoregulates mRNA levels; related to human hnRNPs; nuclear localization sequence binds Kap104p; protein abundance increases in response to DNA replication stress	II	5.50201	5.11479	3.8111	2.92581	1.95081	-1.02892	-3.88599	-3.88599	IV		II	79.7709	3.53821
YLR208W	SEC13	Structural component of 3 complexes; subunit of the Nup84p nuclear pore subcomplex that contributes to nucleocytoplasmic transport and NPC biogenesis; subunit of the COPII vesicle coat required for ER-to-Golgi transport; subunit of SEACAT, a subcomplex of the coatomer-related, vacuolar-associated SEA complex, that inhibits the TORC1 inhibitory role of SEACIT (Iml1p-Npr2p-Npr3p), a GAP for Gtr1p, …	II	5.00792	3.99434	3.19732	2.24722	1.37909	0.351196	-1.30103	-3.88599		III		209.252	9.28131
YDR097C	MSH6	Protein required for mismatch repair in mitosis and meiosis; forms a complex with Msh2p to repair both single-base & insertion-deletion mispairs; also involved in interstrand cross-link repair; potentially phosphorylated by Cdc28p	II	4.36809	4.06384	3.47164	3.01131	1.92942	0.933025	-1.52908	-3.88599	III	IV	IV	37.2878	1.65389
YOL038W	PRE6	Alpha 4 subunit of the 20S proteasome; may replace alpha 3 subunit (Pre9p) under stress conditions to create a more active proteasomal isoform; GFP-fusion protein relocates from cytosol to the mitochondrial surface upon oxidative stress	II	3.37892	2.57567	1.55951	1.37909	1.26191	1.08921	0.826005	-2.80007				204.937	9.08993
YJL096W	MRPL49	Mitochondrial ribosomal protein of the large subunit	II	2.82626	2.50867	1.43462	1.36055	0.919489	0.433313	-2.88599		I			74.9405	3.32396
YNL066W	SUN4	Cell wall protein related to glucanases; possibly involved in cell wall septation; member of the SUN family; SUN4 has a paralog, SIM1, that arose from the whole genome duplication	II	3.98053	2.62978	2.22576	1.44281	0.783862	-0.134019					I	323.994	14.3706
YLL036C	PRP19	Splicing factor associated with the spliceosome; contains a U-box, a motif found in a class of ubiquitin ligases, and a WD40 domain; relocalizes to the cytosol in response to hypoxia	II	4.49689	3.7631	2.71932	2.34073	1.64298	0.826005	-3.71898	-3.71898			II	43.7614	1.94102
YML017W	PSP2	Asn rich cytoplasmic protein that contains RGG motifs; high-copy suppressor of group II intron-splicing defects of a mutation in MRS2 and of a conditional mutation in POL1 (DNA polymerase alpha); possible role in mitochondrial mRNA splicing	II	4.4867	3.63007	3.14447	2.02254	-0.066048	-0.546468	-1.84239	-2.24319		II		51.8721	2.30077
YMR086W	SEG1	Component of eisosome required for proper eisosome assembly; precedes Pil1p/Lsp1p during eisosome formation, controls eisosome length and shape; diffusely distributed, forms heterogeneous patches at plasma membrane in small buds, also found in medium and large buds; expression repressed by cAMP; similar to A. gossypii SEG gene and to S. pombe Sle1p, important for generating eisosomes; SEG1 has a …	II	5.02184	4.17502	3.50867	3.03968	0.867923	-0.158568	-1.84239			III	III	26.8823	1.19235
YJR086W	STE18	G protein gamma subunit; forms a dimer with Ste4p to activate the mating signaling pathway, forms a heterotrimer with Gpa1p and Ste4p to dampen signaling; C-terminus is palmitoylated and farnesylated, which are required for normal signaling	II	3.90836	2.84162	2.43364	2.22794	0.81243	-1.18757	-1.42894	-1.42894			III	60.2072	2.67047
YGR014W	MSB2	Mucin family member involved in various signaling pathways; functions as osmosensor in the Sho1p-mediated HOG pathway; functions in Cdc42p- and MAP kinase-dependent filamentous growth signaling pathway; processed into secreted and cell-associated forms by aspartyl protease Yps1p; potential Cdc28p substrate	II	5.10603	4.39872	3.43352	2.05833	0.589444	-0.885995	-2.30103	-3.88599		III	II	81.6052	3.61957
YNR052C	POP2	RNase of the DEDD superfamily; subunit of the Ccr4-Not complex that mediates 3' to 5' mRNA deadenylation	II	5.08533	4.48852	4.01701	2.19655	1.06567	-0.412911	-3.88599	-3.88599		III	III	53.4285	2.3698
YJR011C		Putative protein of unknown function; GFP-fusion protein expression is induced in response to the DNA-damaging agent MMS	II	4.29568	3.6149	3.15198	1.97887	0.01915	-1.24319					III	16.4073	0.727741
YLR058C	SHM2	Cytosolic serine hydroxymethyltransferase; converts serine to glycine plus 5,10 methylenetetrahydrofolate; major isoform involved in generating precursors for purine, pyrimidine, amino acid, and lipid biosynthesis	II	3.72272	3.03114	1.64794	0.505075	-0.546468	-0.696529	-2.88599	-2.88599		IV	I	338.353	15.0075
YHR162W	MPC2	Highly conserved subunit of the mitochondrial pyruvate carrier; a mitochondrial inner membrane complex comprised of Mpc1p and either Mpc2p or Mpc3p mediates mitochondrial pyruvate uptake; more highly expressed in glucose-containing minimal medium than in lactate-containing medium; MPC2 has a paralog, FMP43, that arose from the whole genome duplication	II	3.47352	2.64191	2.06693	0.840443	0.321334	-1.13402	-2.71898				IV	477.918	21.1979
YOR326W	MYO2	Type V myosin motor involved in actin-based transport of cargos; required for the polarized delivery of secretory vesicles, the vacuole, late Golgi elements, peroxisomes, and the mitotic spindle; MYO2 has a paralog, MYO4, that arose from the whole genome duplication	II	4.40495	3.79381	2.93436	0.861345	-0.053564	-1.30103	-2.88599			II	IV	126.859	5.62679
YDR322W	MRPL35	Mitochondrial ribosomal protein of the large subunit	II	4.68307	3.91235	2.9339	1.49173	0.020896	-0.71607	-1.56407	-1.886	I	III		50.3294	2.23234
YDL064W	UBC9	SUMO-conjugating enzyme involved in the Smt3p conjugation pathway; nuclear protein required for S- and M-phase cyclin degradation and mitotic control; involved in proteolysis mediated by the anaphase-promoting complex cyclosome (APCC)	II	5.992	4.87865	3.18269	1.65556	1.12889	-1.07864	-2.30103	-3.88599		II	II	106.107	4.70635
YER120W	SCS2	Integral ER membrane protein, regulates phospholipid metabolism; one of 6 proteins (Ist2p, Scs2p, Scs22p, Tcb1p, Tcb2p, Tcb3p) that connect ER to plasma membrane (PM) and regulate PI4P levels by controlling access of Sac1p phosphatase to substrate PI4P in the PM; interacts with FFAT motifs in Opi1p, Swh1p, Osh2p, and Osh3p; involved in telomeric silencing; VAP homolog; SCS2 has a paralog, SCS22, …	II	3.13183	2.61393	2.16178	2.01871	1.56702	0.321334	-1.84239				IV	368.916	16.3631
YHR165C	PRP8	Component of U4/U6-U5 snRNP complex; involved in second catalytic step of splicing; participates in spliceosomal assembly through its interaction with U1 snRNA; largest and most evolutionarily conserved protein of the spliceosome; mutations in its human ortholog, PRPF8, cause Retinitis pigmentosa and missplicing in Myelodysplastic syndrome.	II	4.1088	3.00131	1.97673	1.03179	-0.363571	-1.80007	-2.88599	-2.88599		IV		54.1404	2.40138
YGL145W	TIP20	Peripheral membrane protein required for COPI vesicle fusion to the ER; mediates Sey1p-independent homotypic ER fusion; prohibits back-fusion of COPII vesicles with the ER; forms a tethering complex with Sec39p and Dsl1p that interacts with ER SNAREs Sec20p and Use1p	II	4.02136	3.28088	2.46314	1.92896	-0.173995	-0.173995	-2.88599	-2.88599		IV	IV	27.2439	1.20839
YHR170W	NMD3	Protein involved in nuclear export of the large ribosomal subunit; acts as a Crm1p-dependent adapter protein for export of nascent ribosomal subunits through the nuclear pore complex	II	5.64533	4.48662	3.60495	2.80388	1.78089	-1.30103	-1.886	-3.88599		III	III	245.531	10.8904
YKL051W	SFK1	Plasma membrane protein that may act to generate normal levels of PI4P; may act together with or upstream of Stt4p; at least partially mediates proper localization of Stt4p to the plasma membrane	II	4.36536	3.8812	2.96559	1.88424	1.58028	0.078742	-2.88599			III		17.261	0.765608
YGL207W	SPT16	Subunit of the heterodimeric FACT complex (Spt16p-Pob3p); FACT associates with chromatin via interaction with Nhp6Ap and Nhp6Bp, and reorganizes nucleosomes to facilitate access to DNA by RNA and DNA polymerases; SPT16 specifically required for diauxic shift-induced H2B deposition onto rDNA genes; some mutations cause reduced nucleosome occupancy over highly transcribed regions of the yeast genome	II	4.56947	3.56672	2.20398	2.03298	2.00596	0.865981	-1.13402			IV		124.296	5.5131
YHR013C	ARD1	Subunit of protein N-terminal acetyltransferase NatA; NatA is comprised of Nat1p, Ard1p, and Nat5p; acetylates many proteins and thus affects telomeric silencing, cell cycle, heat-shock resistance, mating, and sporulation; human Ard1p levels are elevated in cancer cells; protein abundance increases in response to DNA replication stress	II	5.1765	3.94696	3.08581	2.27507	1.9357	1.07138	-1.80007	-2.71898		IV	II	147.055	6.5226
YHR187W	IKI1	Subunit of hexameric RecA-like ATPase Elp456 Elongator subcomplex; which is required for modification of wobble nucleosides in tRNA; iki1 mutations confer resistance to the K. lactis toxin zymocin	II	3.17303	2.28247	1.55136	1.21548	-0.201274	-0.584536	-2.88599	-2.88599				41.6914	1.84921
YER072W	VTC1	Subunit of the vacuolar transporter chaperone (VTC) complex; VTC complex is involved in membrane trafficking, vacuolar polyphosphate accumulation, microautophagy and non-autophagic vacuolar fusion; also has mRNA binding activity; protein abundance increases in response to DNA replication stress	II	4.74822	4.05503	3.22742	2.64737	1.50383	-2.24319	-2.88599	-3.88599			I	664.622	29.4791
YGL101W		Protein of unknown function; non-essential gene; interacts with the DNA helicase Hpr5p; YGL101W has a paralog, YBR242W, that arose from the whole genome duplication	II	4.40614	3.88364	2.91972	1.95436	1.59958	-1.46156	-3.88599	-3.88599		IV	II	79.6302	3.53197
YLR180W	SAM1	S-adenosylmethionine synthetase; catalyzes transfer of the adenosyl group of ATP to the sulfur atom of methionine; SAM1 has a paralog, SAM2, that arose from the whole genome duplication	II	4.60861	3.44219	2.83995	2.08639	0.596211	0.292289	-0.549056	-3.71898		II	III	558.609	24.7769
YKL180W	RPL17A	Ribosomal 60S subunit protein L17A; copurifies with the Dam1 complex (aka DASH complex); homologous to mammalian ribosomal protein L17 and bacterial L22; RPL17A has a paralog, RPL17B, that arose from the whole genome duplication; protein abundance increases in response to DNA replication stress	II	3.35137	2.22945	1.72402	0.777922	0.311717	0.230873	-1.24319	-1.49493			II	1518.73	67.3627
YMR205C	PFK2	Beta subunit of heterooctameric phosphofructokinase; involved in glycolysis; indispensable for anaerobic growth; activated by fructose-2,6-bisphosphate and AMP; mutation inhibits glucose induction of cell cycle-related genes	II	3.73599	3.43491	3.07606	1.93836	1.46032	-2.88599				IV	IV	791.06	35.0872
YGL031C	RPL24A	Ribosomal 60S subunit protein L24A; not essential for translation but may be required for normal translation rate; homologous to mammalian ribosomal protein L24, no bacterial homolog; RPL24A has a paralog, RPL24B, that arose from the whole genome duplication	II	5.1112	3.93482	2.78913	1.72039	0.792847	-0.145262	-0.842394	-1.56407		IV		2871.34	127.357
YBL006C	LDB7	Component of the RSC chromatin remodeling complex; interacts with Rsc3p, Rsc30p, Npl6p, and Htl1p to form a module important for a broad range of RSC functions	II	5.55512	4.4719	3.35688	2.50687	1.11319	-1.27182	-3.88599	-3.88599		II	II	65.1561	2.88998
YNL189W	SRP1	Karyopherin alpha homolog; forms a dimer with karyopherin beta Kap95p to mediate import of nuclear proteins, binds the nuclear localization signal of the substrate during import; involved in cotranslational protein degradation; binds ribosome-bound nascent polypeptides; Srp1p and Sts1p couple proteasomes to nascent polypeptides emerging from the ribosome for cotranslational degradation	II	4.21715	3.41067	2.84378	1.45224	0.007282	-1.00468					IV	210.865	9.35284
YCR035C	RRP43	Exosome non-catalytic core component; involved in 3'-5' RNA processing and degradation in both the nucleus and the cytoplasm; has similarity to E. coli RNase PH and to human hRrp43p (OIP2, EXOSC8); protein abundance increases in response to DNA replication stress	II	4.75279	4.11769	3.24123	2.4042	1.05993	-1.46156	-2.18757			III	IV	80.354	3.56408
YDR087C	RRP1	Essential evolutionarily conserved nucleolar protein; necessary for biogenesis of 60S ribosomal subunits and for processing of pre-rRNAs to mature rRNA; associated with several distinct 66S pre-ribosomal particles	II	5.23649	4.36712	3.60342	2.89047	1.71311	-0.885995	-3.88599	-3.88599		IV	II	159.079	7.05588
YFL038C	YPT1	Rab family GTPase; involved in the ER-to-Golgi step of the secretory pathway; complex formation with the Rab escort protein Mrs6p is required for prenylation of Ypt1p by protein geranylgeranyltransferase type II (Bet2p-Bet4p); binds to unspliced HAC1 mRNA; regulates unfolded protein response (UPR) by promoting the decay of HAC1 RNA	II	3.58686	2.85308	2.04968	1.08524	0.66048	0.13597	-0.053564	-0.564067	IV		III	431.194	19.1255
YKL079W	SMY1	Kinesin-like myosin passenger-protein; interacts with Myo2p; controls actin cable structure and dynamics; proposed to be involved in exocytosis	II	3.58313	2.96712	1.90357	1.23163	0.887477	0.369852	-3.71898					30.6026	1.35737
YMR274C	RCE1	Type II CAAX prenyl protease; involved in the proteolysis and maturation of Ras and the a-factor mating pheromone	II	3.49901	2.31207	1.99186	0.433313	0.359174	-0.397053	-2.13402				III	14.0609	0.623665
YIL004C	BET1	Type II membrane protein required for vesicular transport; required for vesicular transport between the endoplasmic reticulum and Golgi complex; v-SNARE with similarity to synaptobrevins	II	2.99765	2.15373	1.52956	1.15602	0.859395	0.74045	0.088373					31.5601	1.39984
YER087W	AIM10	Protein with similarity to tRNA synthetases; non-tagged protein is detected in purified mitochondria; null mutant is viable and displays elevated frequency of mitochondrial genome loss	II	3.15587	2.61617	1.9579	1.35519	0.665806	-0.030724	-3.88599	-3.88599	II	III		12.197	0.540996
YBR198C	TAF5	Subunit (90 kDa) of TFIID and SAGA complexes; involved in RNA polymerase II transcription initiation and in chromatin modification	II	4.22018	3.02548	2.13244	1.55544	-0.639446	-1.46156	-2.18757	-2.18757		IV	II	51.7187	2.29397
YKL060C	FBA1	Fructose 1,6-bisphosphate aldolase; required for glycolysis and gluconeogenesis; catalyzes conversion of fructose 1,6 bisphosphate to glyceraldehyde-3-P and dihydroxyacetone-P; locates to mitochondrial outer surface upon oxidative stress; N-terminally propionylated in vivo	II	3.69945	2.9006	2.3512	0.806607	-0.410556	-0.86403	-1.27182	-1.84239			IV	12205.2	541.359
YDL100C	GET3	Guanine nucleotide exchange factor for Gpa1p; amplifies G protein signaling; functions as a chaperone under ATP-depleted oxidative stress conditions; subunit of GET complex, involved in ATP dependent Golgi to ER trafficking and insertion of tail-anchored (TA) proteins into ER membrane under non-stress conditions; binds as dimer to transmembrane domain (TMD) cargo, shielding TMDs from aqueous solv…	II	3.59055	2.77293	2.24179	1.45224	0.819233	0.145228	-3.88599	-3.88599		III	III	418.219	18.55
YHR099W	TRA1	Subunit of SAGA and NuA4 histone acetyltransferase complexes; interacts with acidic activators (e.g., Gal4p) which leads to transcription activation; similar to human TRRAP, which is a cofactor for c-Myc mediated oncogenic transformation	II	4.59304	3.51574	2.83734	2.38437	1.45224	-0.379063	-1.05356			IV	III	62.2227	2.75987
YJL184W	GON7	Component of the EKC/KEOPS protein complex; EKC/KEOPS complex is required for t6A tRNA modification and telomeric TG1-3 recombination; may have role in transcription; implicated in osmotic stress response; other complex members are Kae1p, Cgi121p, Pcc1p, and Bud32p	II	3.59606	3.07932	2.44786	2.03385	1.67764	-0.22908	-1.07864	-1.56407	III		III	62.106	2.75469
YGL017W	ATE1	Arginyl-tRNA-protein transferase; catalyzes post-translational conjugation of arginine to the amino termini of acceptor proteins which are then subject to degradation via the N-end rule pathway	II	2.93006	2.73686	1.599	1.23012	0.981458	0.924875						20.1361	0.893128
YGR054W		Eukaryotic initiation factor (eIF) 2A; associates specifically with both 40S subunits and 80 S ribosomes, and interacts genetically with both eIF5b and eIF4E; homologous to mammalian eIF2A	II	4.33371	3.50987	2.65936	1.9579	1.45661	-0.738831	-3.71898		II			199.049	8.82874
YIR004W	DJP1	Cytosolic J-domain-containing protein; required for peroxisomal protein import and involved in peroxisome assembly, homologous to E. coli DnaJ	II	3.10264	2.38632	1.79234	1.42573	1.02592	-0.677249	-1.84239	-3.88599				50.7034	2.24893
YLR291C	GCD7	Beta subunit of the translation initiation factor eIF2B; the guanine-nucleotide exchange factor for eIF2; activity subsequently regulated by phosphorylated eIF2; first identified as a negative regulator of GCN4 expression	II	2.92761	2.30446	1.65119	1.18342	0.587089	0.442155	-3.71898					169.931	7.53721
YJL186W	MNN5	Alpha-1,2-mannosyltransferase; responsible for addition of the second alpha-1,2-linked mannose of the branches on the mannan backbone of oligosaccharides, localizes to an early Golgi compartment	II	5.12254	4.33186	3.58243	2.71466	1.34649	-0.529081	-2.18757	-2.18757		III	IV	116.011	5.14563
YLR244C	MAP1	Methionine aminopeptidase; catalyzes the cotranslational removal of N-terminal methionine from nascent polypeptides; function is partially redundant with that of Map2p	II	5.53147	4.50582	3.61881	2.58139	-0.080511	-0.957405	-2.18757	-3.71898	II	III	III	356.026	15.7914
YCR030C	SYP1	Negative regulator of WASP-Arp23 complex; involved in endocytic site formation; directly inhibits Las17p stimulation of Arp23 complex-mediated actin assembly in vitro; may regulate assembly and disassembly of the septin ring; colocalizes and interacts with septin subunits; potential role in actin cytoskeletal organization	II	4.59381	3.82482	3.14427	2.82963	2.2305	-0.201274	-1.52908	-2.24319		III	IV	23.4171	1.03866
YGR027C	RPS25A	Protein component of the small (40S) ribosomal subunit; homologous to mammalian ribosomal protein S25, no bacterial homolog; RPS25A has a paralog, RPS25B, that arose from the whole genome duplication	II	3.5299	2.74793	2.11595	1.56011	1.01411	0.13597	-0.066048	-1.30103			III	3552.64	157.576
YOR283W		Phosphatase with a broad substrate specificity; has some similarity to GPM1/YKL152C, a phosphoglycerate mutase; YOR283W is not an essential gene	II	4.68193	3.63157	3.34427	2.20734	0.797707	0.797707				IV	II	106.492	4.7234
YDL161W	ENT1	Epsin-like protein involved in endocytosis and actin patch assembly; functionally redundant with Ent2p; binds clathrin via a clathrin-binding domain motif at C-terminus; relocalizes from bud neck to cytoplasm upon DNA replication stress; ENT1 has a paralog, ENT2, that arose from the whole genome duplication	II	3.87023	2.93882	2.40905	1.90949	1.07138	0.088373						36.1951	1.60542
YPL079W	RPL21B	Ribosomal 60S subunit protein L21B; homologous to mammalian ribosomal protein L21, no bacterial homolog; RPL21B has a paralog, RPL21A, that arose from the whole genome duplication	II	3.65027	2.92697	2.37516	1.21108	-0.286352	-0.86403	-1.05356	-2.88599			III	1106.03	49.0577
YDL082W	RPL13A	Ribosomal 60S subunit protein L13A; not essential for viability; homologous to mammalian ribosomal protein L13, no bacterial homolog; RPL13A has a paralog, RPL13B, that arose from the whole genome duplication	II	4.80892	3.79048	3.09726	1.85093	0.605276	-0.363571	-0.511902	-1.52908			IV	823.53	36.5274
YFL045C	SEC53	Phosphomannomutase; involved in synthesis of GDP-mannose and dolichol-phosphate-mannose; required for folding and glycosylation of secretory proteins in the ER lumen	II	4.10574	3.09306	1.97063	1.50445	0.596211	0.379091	-1.24319	-1.24319	IV	III	I	788.453	34.9716
YMR131C	RRB1	Nuclear protein involved in early steps of ribosome biogenesis; physically interacts with the ribosomal protein Rpl3p; essential gene	II	5.16356	3.62924	2.04636	0.833739	-0.348244	-1.49493				III		328.046	14.5504
YIL052C	RPL34B	Ribosomal 60S subunit protein L34B; homologous to mammalian ribosomal protein L34, no bacterial homolog; RPL34B has a paralog, RPL34A, that arose from the whole genome duplication	II	3.83936	2.34919	2.04388	1.38895	0.951722	0.311717	-2.80007		IV	IV	III	1034.56	45.8878
YMR115W	MGR3	Subunit of the mitochondrial (mt) i-AAA protease supercomplex; i-AAA degrades misfolded mitochondrial proteins; forms a subcomplex with Mgr1p that binds to substrates to facilitate proteolysis; required for growth of cells lacking mtDNA	II	3.82938	2.88652	1.51706	0.938361	-0.160546	-0.428945	-2.88599	-3.88599	III			31.2318	1.38527
YNL273W	TOF1	Subunit of a replication-pausing checkpoint complex; Tof1p-Mrc1p-Csm3p acts at the stalled replication fork to promote sister chromatid cohesion after DNA damage, facilitating gap repair of damaged DNA; interacts with the MCM helicase; relocalizes to the cytosol in response to hypoxia	II	5.02386	4.27702	3.47583	1.93035	1.54788	0.572246	-1.84239			III	III	15.6402	0.693717
YDR159W	SAC3	mRNA export factor; required for biogenesis of the small ribosomal subunit; component of TREX-2 complex (Sac3p-Thp1p-Sus1p-Cdc31p) involved in transcription elongation and mRNA export from the nucleus; involved in post-transcriptional tethering of active genes to the nuclear periphery and to non-nascent mRNP; similar to the human germinal center-associated nuclear protein (GANP)	II	5.25173	4.64621	3.43302	2.20811	1.65612	0.983251	-2.30103	-2.88599				25.7085	1.14029
YDR418W	RPL12B	Ribosomal 60S subunit protein L12B; rpl12a rpl12b double mutant exhibits slow growth and slow translation; homologous to mammalian ribosomal protein L12 and bacterial L11; RPL12B has a paralog, RPL12A, that arose from the whole genome duplication	II	4.4812	3.69298	2.67312	1.80952	1.24179	-0.478145	-2.71898				IV	3443.71	152.744
YGR119C	NUP57	FG-nucleoporin component of central core of the nuclear pore complex; contributes directly to nucleocytoplasmic transport and maintenance of the nuclear pore complex (NPC) permeability barrier; found in stable complex with Nic96p and two other FG-nucleoproteins (Nsp1p and Nup49p)	II	3.8224	2.91473	1.95172	1.60017	1.23597	0.963145	-1.84239	-3.88599		III	II	75.4073	3.34467
YDR451C	YHP1	Homeobox transcriptional repressor; binds Mcm1p and early cell cycle box (ECB) elements of cell cycle regulated genes, thereby restricting ECB-mediated transcription to the M/G1 interval; YHP1 has a paralog, YOX1, that arose from the whole genome duplication	II	3.66867	3.29315	2.78038	0.379091	-0.566687	-0.718981	-0.718981	-3.71898		IV	II	28.4903	1.26368
YIL103W	DPH1	Protein required for synthesis of diphthamide; required along with Dph2p, Kti11p, Jjj3p, and Dph5p; diphthamide is a modified histidine residue of translation elongation factor 2 (Eft1p or Eft2p); may act in a complex with Dph2p and Kti11p	II	4.7771	3.86309	3.10125	1.78489	0.659359	-2.80007	-3.71898			IV	III	61.0662	2.70857
YDR363W-A	SEM1	Component of lid subcomplex of 26S proteasome regulatory subunit; involved in mRNA export mediated by TREX-2 complex (Sac3p-Thp1p); assumes different conformations in different contexts, functions as molecular glue stabilizing the Rpn3p/Rpn7p regulatory heterodimer, and tethers it to lid helical bundle; ortholog of human DSS1; protein abundance increases in response to DNA replication stress	II	3.60426	2.87888	2.53431	1.9828	1.36985	0.488098	0.341776	-0.426563		IV	III	203.671	9.03375
YBR035C	PDX3	Pyridoxine (pyridoxamine) phosphate oxidase; has homologs in E. coli and Myxococcus xanthus; transcription is under the general control of nitrogen metabolism	II	5.15987	4.4308	3.12244	2.05545	0.689377	-0.461558				IV		133.943	5.94101
YKR095W-A	PCC1	Component of the EKC/KEOPS protein complex; EKC/KEOPS complex is required for t6A tRNA modification and telomeric TG1-3 recombination; may have role in transcription; other complex members are Kae1p, Gon7p, Bud32p, and Cgi121p	II	3.32868	3.05439	2.38105	2.01871	1.20955	-1.84239	-2.24319	-3.88599	III		IV	66.5298	2.95091
YOR064C	YNG1	Subunit of the NuA3 histone acetyltransferase complex; this complex acetylates histone H3; contains PHD finger domain that interacts with methylated histone H3; shares significant sequence identity with the human candidate tumor suppressor p33-ING1 in C-terminal region	II	3.29631	2.88075	1.81003	1.56417	0.683034	0.157606	-2.24319		III		III	14.6741	0.650863
YML129C	COX14	Mitochondrial cytochrome c oxidase (complex IV) assembly factor; also involved in translational regulation of Cox1p and prevention of Cox1p aggregation before assembly; associates with complex IV assembly intermediates and complex III/complex IV supercomplexes; located in the mitochondrial membrane	II	4.09194	3.51888	2.60469	2.21328	0.854738	0.488098	0.178922	-1.52908	I	II		72.8515	3.2313
YGR191W	HIP1	High-affinity histidine permease; also involved in the transport of manganese ions	II	4.40719	3.67027	2.89668	1.91314	-0.410556	-2.30103	-2.88599			III	IV	100.35	4.451
YGR169C	PUS6	tRNA:pseudouridine synthase; catalyzes the conversion of uridine to pseudouridine at position 31 in cytoplasmic and mitochondrial tRNAs; mutation of Asp168 to Ala abolishes enzyme activity; not essential for viability	II	3.18454	2.30895	1.5831	1.35917	0.077064	-0.134019	-0.718981					16.9232	0.750623
YDR524C-B		Putative protein of unknown function; YDR524C-B has a paralog, YCL048W-A, that arose from the whole genome duplication	II	4.24703	3.09467	2.03222	1.40779	0.13597	-1.30103	-1.56407	-2.88599			I	4059.45	180.056
YGL028C	SCW11	Cell wall protein with similarity to glucanases; may play a role in conjugation during mating based on its regulation by Ste12p	II	4.82069	4.07496	3.49248	3.04281	2.34108	0.572246	-2.30103			IV		139.636	6.19352
YNR046W	TRM112	Protein involved in methylation of tRNA, rRNA, and translation factors; also involved in ribosome biogenesis; subunit of tRNA methyltransferase (MTase) complexes in combination with Trm9p and Trm11p; N7-methylates G1575 of 18S rRNA as complex with Bud23p; subunit of complex with Mtq2p that methylates Sup45p (eRF1) in the ternary complex eRF1-eRF3-GTP; relative distribution to the nucleus increase…	II	5.18523	4.24594	3.41467	2.67041	1.72295	-0.821078	-2.71898			II	II	164.296	7.28727
YER025W	GCD11	Gamma subunit of the translation initiation factor eIF2; involved in the identification of the start codon; binds GTP when forming the ternary complex with GTP and tRNAi-Met; mutations in human ortholog cause X-linked intellectual disability (XLID)	II	5.85895	4.80148	4.01734	2.50867	1.10042	-0.067902	-2.24319	-2.24319		III		362.533	16.08
YLR026C	SED5	cis-Golgi t-SNARE syntaxin; required for vesicular transport between the ER and the Golgi complex; binds at least 9 SNARE proteins	II	4.21799	3.31502	2.56619	1.7854	0.763884	-0.658224	-2.80007			III		57.8171	2.56446
YMR193W	MRPL24	Mitochondrial ribosomal protein of the large subunit; two mitochondrial ribosomal proteins, YmL14 and YmL24, have been assigned to the same gene	II	3.86061	3.33142	2.36555	1.96144	0.933952	-1.02892	-3.88599		II			31.2605	1.38655
YIL051C	MMF1	Mitochondrial protein required for transamination of isoleucine; but not of valine or leucine; may regulate specificity of branched-chain transaminases Bat1p and Bat2p; induction of expression in response to stress is mediated by a Hog1p-regulated antisense RNA and gene looping; interacts genetically with mitochondrial ribosomal protein genes; MMF1 has a paralog, HMF1, that arose from the whole g…	II	5.25538	4.13056	3.53859	2.62813	1.90037	1.31172	-2.18757	-2.80007	III	II	II	933.849	41.4206
YJL069C	UTP18	Small-subunit processome protein involved in pre-18S rRNA maturation; part of a subunit of the 90S preribosomal particle capable of interacting directly with the 5' ETS of the 35S pre-rRNA; contains WD40 repeats	II	4.58939	4.03531	3.02483	0.97718	-0.093231	-1.18757	-1.80007	-2.88599		IV		85.5	3.79232
YNL087W	TCB2	ER protein involved in ER-plasma membrane tethering; one of 6 proteins (Ist2p, Scs2p, Scs22p, Tcb1p, Tcb2p, Tcb3p) that connect ER to plasma membrane (PM) and regulate PM phosphatidylinositol-4-phosphate (PI4P) levels by controlling access of Sac1p phosphatase to its substrate PI4P in the PM; contains 3 calcium and lipid binding domains; mRNA is targeted to bud; TCB2 has a paralog, TCB1, that aro…	II	4.92174	4.04467	3.46157	2.07464	-1.07864	-1.56407	-3.88599	-3.88599		III	II	114.997	5.10065
YNR060W	FRE4	Ferric reductase; reduces a specific subset of siderophore-bound iron prior to uptake by transporters; expression induced by low iron levels	II	3.81025	3.09425	2.62065	1.93928	1.03677	-1.56407	-2.88599	-3.88599		III	II	7.6253	0.338218
YPL217C	BMS1	GTPase required for ribosomal subunit synthesis and rRNA processing; required for synthesis of 40S ribosomal subunits and for processing the 35S pre-rRNA at sites A0, A1, and A2; interacts with Rcl1p, which stimulates its GTPase and U3 snoRNA binding activities; has similarity to Tsr1p	II	3.76451	2.96735	2.49598	1.58369	0.798726	-0.21511	-0.779369	-1.75896				62.4752	2.77107
YLR406C	RPL31B	Ribosomal 60S subunit protein L31B; associates with karyopherin Sxm1p; loss of both Rpl31p and Rpl39p confers lethality; homologous to mammalian ribosomal protein L31, no bacterial homolog; RPL31B has a paralog, RPL31A, that arose from the whole genome duplication	II	4.27489	3.49917	2.72141	1.74866	1.41097	0.379091	0.01915	-3.88599	II	III	I	505.462	22.4196
YNL236W	SIN4	Subunit of the RNA polymerase II mediator complex; associates with core polymerase subunits to form the RNA polymerase II holoenzyme; contributes to both postive and negative transcriptional regulation; dispensible for basal transcription	II	3.6375	2.935	2.49323	1.5254	1.11708	-1.49493	-1.49493	-1.80007				33.9678	1.50663
YIL033C	BCY1	Regulatory subunit of the cyclic AMP-dependent protein kinase (PKA); PKA is a component of a signaling pathway that controls a variety of cellular processes, including metabolism, cell cycle, stress response, stationary phase, and sporulation	II	4.73072	4.30437	3.27558	2.25151	0.596211	-1.46156	-2.88599			III		72.2983	3.20677
YOR157C	PUP1	Beta 2 subunit of the 20S proteasome; endopeptidase with trypsin-like activity that cleaves after basic residues; synthesized as a proprotein before being proteolytically processed for assembly into 20S particle; human homolog is subunit Z	II	3.31827	2.64191	1.62368	1.45596	0.769882	0.415464	0.088373			IV		216.094	9.58478
YIL091C	UTP25	Nucleolar protein; required for 35S pre-RNA processing and 40S ribosomal subunit biogenesis	II	4.23106	2.81319	2.11278	1.29789	0.078742	-1.46156	-2.13402					63.3256	2.80879
YBL007C	SLA1	Cytoskeletal protein binding protein; required for assembly of the cortical actin cytoskeleton; interacts with proteins regulating actin dynamics and proteins required for endocytosis; found in the nucleus and cell cortex; has 3 SH3 domains	II	5.68858	4.78407	3.93154	3.19412	1.60411	0.261169	-3.88599			III	III	140.985	6.25334
YAL005C	SSA1	ATPase involved in protein folding and NLS-directed nuclear transport; member of HSP70 family; forms chaperone complex with Ydj1p; localized to nucleus, cytoplasm, and cell wall; 98% identical with paralog Ssa2p, but subtle differences between the two proteins provide functional specificity with respect to propagation of yeast [URE3] prions and vacuolar-mediated degradations of gluconeogenesis en…	II	3.91385	3.14507	2.32718	1.1179	0.311717	-1.46156	-2.80007					469.721	20.8343
YJL008C	CCT8	Subunit of the cytosolic chaperonin Cct ring complex; related to Tcp1p, required for the assembly of actin and tubulins in vivo	II	4.25386	3.45114	2.46346	1.22652	0.090038	-1.49493				IV		233.956	10.377
YDR430C	CYM1	Lysine-specific metalloprotease of the pitrilysin family; metalloprotease of the intermembrane space; degrades proteins and presequence peptides cleaved from imported proteins; required for normal mitochondrial morphology	II	3.98765	2.53401	1.91949	1.1234	0.460966	-2.30103	-2.30103		II	IV	IV	36.2181	1.60644
YMR241W	YHM2	Citrate and oxoglutarate carrier protein; exports citrate from and imports oxoglutarate into the mitochondrion, causing net export of NADPH reducing equivalents; also associates with mt nucleoids and has a role in replication and segregation of the mt genome	II	4.27303	3.23926	2.54081	1.00131	-0.243186	-1.27182	-2.88599	-3.88599		IV	II	199.736	8.85922
YER056C-A	RPL34A	Ribosomal 60S subunit protein L34A; homologous to mammalian ribosomal protein L34, no bacterial homolog; RPL34A has a paralog, RPL34B, that arose from the whole genome duplication	II	3.58313	2.32479	1.65176	0.580279	0.123405	-0.201274	-2.24319	-2.80007	IV	IV	II	934.198	41.436
YER048C	CAJ1	Nuclear type II J heat shock protein of the E. coli dnaJ family; contains a leucine zipper-like motif, binds to non-native substrates for presentation to Ssa3p, may function during protein translocation, assembly and disassembly	II	4.25072	3.71868	3.21529	1.74918	0.503827	0.271128	-2.80007			III	III	105.348	4.67266
YJR072C	NPA3	Member of the conserved GPN-loop GTPase family; has a role in transport of RNA polymerase II to the nucleus; exhibits GTP-dependent binding to PolII; has ATPase activity; involved in sister chromatid cohesion; phosphorylated by the Pcl1p-Pho85p kinase complex; human homolog XAB1 interacts with human RNA polymerase II; protein abundance increases in response to DNA replication stress	II	4.45106	3.73882	2.56387	1.19548	0.690474	0.007282	-2.71898	-2.71898				139.794	6.2005
YDR170C	SEC7	Guanine nucleotide exchange factor (GEF) for ADP ribosylation factors; involved in proliferation of the Golgi, intra-Golgi transport and ER-to-Golgi transport; found in the cytoplasm and on Golgi-associated coated vesicles	II	4.785	3.86272	2.85848	0.97538	0.804581	-3.71898				IV		116.384	5.16217
YPL094C	SEC62	Essential subunit of Sec63 complex; with Sec61 complex, Kar2p/BiP and Lhs1p forms a channel competent for SRP-dependent and post-translational SRP-independent protein targeting and import into the ER; cotranslationally N-acetylated by NatA; other members are Sec63p, Sec66p, and Sec72p	II	4.29918	3.15278	2.31725	0.28393	0.28393	-0.301032	-2.30103	-2.30103	II	IV	II	164.355	7.2899
YFL028C	CAF16	Part of evolutionarily-conserved CCR4-NOT regulatory complex; contains single ABC-type ATPase domain but no transmembrane domain; interacts with several subunits of Mediator	II	4.05945	3.57969	2.84304	1.84662	1.00043	-1.00468	-3.88599	-3.88599				55.8204	2.47589
YMR076C	PDS5	Cohesion maintenance factor; involved in sister chromatid condensation and cohesion; colocalizes with cohesin on chromosomes; performs its cohesin maintenance function in pre-anaphase cells by protecting the integrity of the cohesion complex; also required during meiosis; relocalizes to the cytosol in response to hypoxia	II	4.8315	4.11572	3.31087	2.90173	1.61588	-0.718981	-1.13402	-1.13402		III	IV	27.3381	1.21257
YDL075W	RPL31A	Ribosomal 60S subunit protein L31A; associates with karyopherin Sxm1p; loss of both Rpl31p and Rpl39p confers lethality; homologous to mammalian ribosomal protein L31, no bacterial homolog; RPL31A has a paralog, RPL31B, that arose from the whole genome duplication	II	4.529	3.39237	2.48136	1.60863	0.712568	0.505075	-0.028917	-1.886	III	IV	II	1498.37	66.4597
YNL151C	RPC31	RNA polymerase III subunit C31	II	3.42623	2.76441	2.482	1.38962	0.792847	-0.71607	-2.30103	-2.30103			II	57.9053	2.56837
YGL148W	ARO2	Bifunctional chorismate synthase and flavin reductase; catalyzes the conversion of 5-enolpyruvylshikimate 3-phosphate (EPSP) to form chorismate, which is a precursor to aromatic amino acids; protein abundance increases in response to DNA replication stress	II	5.38436	4.53261	2.75832	1.87399	1.53431	-0.564067	-1.886	-3.88599		III	III	446.149	19.7888
YDR083W	RRP8	Nucleolar S-adenosylmethionine-dependent rRNA methyltransferase; methylates adenine (m1A) of the large subunit (LSU) rRNA at position 645; involved in pre-rRNA cleavage at site A2; mutation is synthetically lethal with a gar1 mutation; deletion disrupts telomere maintenance by influencing the expression of neighboring gene STN1	II	3.50312	2.82725	2.3152	1.81684	0.97718	0.351196	-1.27182	-2.24319				83.8251	3.71804
YGR162W	TIF4631	Translation initiation factor eIF4G; subunit of the mRNA cap-binding protein complex (eIF4F) that also contains eIF4E (Cdc33p); interacts with Pab1p and with eIF4A (Tif1p); also has a role in biogenesis of the large ribosomal subunit; TIF4631 has a paralog, TIF4632, that arose from the whole genome duplication	II	4.88329	3.80328	2.56792	1.53017	0.704155	-3.88599				III	IV	396.495	17.5864
YGR177C	ATF2	Alcohol acetyltransferase; may play a role in steroid detoxification; forms volatile esters during fermentation, which is important for brewing and winemaking	II	4.03073	3.39693	2.58398	1.76336	0.554841	-0.758957	-2.18757	-3.71898				49.5184	2.19637
YNL044W	YIP3	Protein localized to COPII vesicles; proposed to be involved in ER to Golgi transport; interacts with members of the Rab GTPase family and Yip1p; also interacts with Rtn1p	II	5.27047	4.45614	3.43856	1.91949	0.505075	-1.05356	-1.52908	-3.88599	IV	II	II	126.699	5.61968
YOL040C	RPS15	Protein component of the small (40S) ribosomal subunit; homologous to mammalian ribosomal protein S15 and bacterial S19	II	3.74025	2.92177	1.53079	0.51349	-0.243186	-1.00468	-2.18757					4866.63	215.858
YCR046C	IMG1	Mitochondrial ribosomal protein of the large subunit; required for respiration and for maintenance of the mitochondrial genome	II	3.37499	2.7123	2.17323	1.57165	0.956989	-1.75896	-1.75896	-3.71898	I	III		48.3089	2.14273
YOR312C	RPL20B	Ribosomal 60S subunit protein L20B; homologous to mammalian ribosomal protein L18A, no bacterial homolog; RPL20B has a paralog, RPL20A, that arose from the whole genome duplication	II	5.5877	4.6508	3.40373	2.14603	1.12422	-0.028917	-0.821078	-2.88599		III	IV	1455.45	64.556
YPR125W	YLH47	Mitochondrial inner membrane protein; exposed to the mitochondrial matrix; associates with mitochondrial ribosomes; NOT required for respiratory growth; homolog of human Letm1, a protein implicated in Wolf-Hirschhorn syndrome	II	5.03871	4.31216	3.54081	2.71412	1.35657	0.51473	-2.30103	-3.88599	IV	IV		58.8962	2.61232
YDR190C	RVB1	ATP-dependent DNA helicase, also known as pontin; member of the AAA+ and RuvB-like protein families; similar to Rvb2p; conserved component of multiple complexes including the INO80 complex, the Swr1 complex, and the R2TP complex (Rvb1-Rvb2-Tah1-Pih1); involved in multiple processes such as chromatin remodeling, box C/D snoRNP assembly, and RNA polymerase II assembly	II	4.04655	2.77216	2.50625	1.66259	1.0064	0.187909	-1.13402	-3.71898		IV	II	141.815	6.29014
YDR025W	RPS11A	Protein component of the small (40S) ribosomal subunit; homologous to mammalian ribosomal protein S11 and bacterial S17; N-terminally propionylated in vivo; RPS11A has a paralog, RPS11B, that arose from the whole genome duplication	II	4.70202	3.40988	2.43019	1.26265	0.488098	-1.49493	-2.88599				III	1041.79	46.2081
YBR133C	HSL7	Protein arginine N-methyltransferase; exhibits septin and Hsl1p-dependent bud neck localization and periodic Hsl1p-dependent phosphorylation; required along with Hsl1p for bud neck recruitment, phosphorylation, and degradation of Swe1p; relocalizes away from bud neck upon DNA replication stress	II	3.79726	2.89924	1.66315	1.33159	1.05503	0.734328	-1.886	-3.88599				35.7883	1.58738
YLR262C-A	TMA7	Protein of unknown that associates with ribosomes; null mutant exhibits translation defects, altered polyribosome profiles, and resistance to the translation inhibitor anisomcyin; protein abundance increases in response to DNA replication stress	II	3.38075	2.74945	2.06979	1.54256	1.50867	1.11708	0.783862					505.78	22.4337
YBL104C	SEA4	Subunit of SEACAT, a subcomplex of the SEA complex; Sea4p, along with Rtc1p and Mtc5p, redundantly inhibit the TORC1 inhibitory role of the Iml1p/SEACIT (Iml1p-Npr2p-Npr3p) subcomplex, a GAP for GTPase Gtr1p (EGOC subunit) in response to amino acid limitation, thereby resulting in activation of TORC1 signaling; SEA is a coatomer-related complex that associates dynamically with the vacuole; contai…	II	5.14181	4.22075	3.45349	1.63643	0.887477	-0.758957				IV		24.2541	1.07578
YOR311C	DGK1	Diacylglycerol kinase; localized to the endoplasmic reticulum (ER); overproduction induces enlargement of ER-like membrane structures and suppresses a temperature-sensitive sly1 mutation; contains a CTP transferase domain	II	4.48289	3.87586	3.14292	1.30689	0.434624	-1.46156	-3.71898	-3.71898		III		54.1215	2.40054
YKL204W	EAP1	eIF4E-associated protein, competes with eIF4G for binding to eIF4E; accelerates mRNA degradation by promoting decapping, facilitated by interaction with eIF4E; essential for Puf5p mediated repression; associates with Puf5p and Dhh1p; inhibits cap-dependent translation; functions independently of eIF4E to maintain genetic stability; plays a role in cell growth, implicated in the TOR signaling casc…	II	4.46756	3.77229	2.99315	2.08032	1.16673	-0.779369	-1.42894	-1.42894		IV		38.8017	1.72104
YOL139C	CDC33	mRNA cap binding protein and translation initiation factor eIF4E; the eIF4E-cap complex is responsible for mediating cap-dependent mRNA translation via interactions with translation initiation factor eIF4G (Tif4631p or Tif4632p); protein abundance increases in response to DNA replication stress; mutants are defective for adhesion and pseudohyphal growth	II	3.73216	2.78887	1.86792	1.30275	0.199927	-0.842394	-1.886	-1.886				856.314	37.9815
YCR015C	CTO1	Protein required for cold tolerance; involved in phosphate uptake; YCR015C is not an essential gene	II	3.57597	2.90677	2.59621	2.15681	1.469	1.32063	-2.71898	-3.71898			II	21.1619	0.93863
YDR507C	GIN4	Protein kinase involved in bud growth and assembly of the septin ring; proposed to have kinase-dependent and kinase-independent activities; undergoes autophosphorylation; similar to Hsl1p; GIN4 has a paralog, KCC4, that arose from the whole genome duplication	II	5.01651	4.35729	3.78476	2.28775	0.146829	-1.56407	-2.30103	-2.88599		III		58.8693	2.61113
YMR123W	PKR1	V-ATPase assembly factor; functions with other V-ATPase assembly factors in the ER to efficiently assemble the V-ATPase membrane sector (V0); protein abundance increases in response to DNA replication stress	II	4.44808	3.73972	2.92761	1.03677	-0.86403	-1.05356	-2.24319	-3.88599		IV	I	164.181	7.28217
YOR323C	PRO2	Gamma-glutamyl phosphate reductase; catalyzes the second step in proline biosynthesis	II	5.60315	4.68331	3.98278	2.54431	-0.093231	-0.461558	-2.88599	-2.88599	IV	III	II	242.153	10.7406
YEL054C	RPL12A	Ribosomal 60S subunit protein L12A; rpl12a rpl12b double mutant exhibits slow growth and slow translation; homologous to mammalian ribosomal protein L12 and bacterial L11; RPL12A has a paralog, RPL12B, that arose from the whole genome duplication	II	4.81086	3.72724	2.63064	1.45288	-0.286352	-1.52908	-2.88599		IV	III	II	2193.57	97.2952
YLR061W	RPL22A	Ribosomal 60S subunit protein L22A; required for the oxidative stress response in yeast; homologous to mammalian ribosomal protein L22, no bacterial homolog; RPL22A has a paralog, RPL22B, that arose from the whole genome duplication	II	4.07164	2.96473	1.71311	0.683034	-0.842394	-1.24319	-1.52908	-1.52908			II	1568.15	69.555
YGR206W	MVB12	ESCRT-I subunit required to stabilize ESCRT-I core complex oligomers; the ESCRT-I core complex (Stp22p, Vps28p, Srn2p) is involved in ubiquitin-dependent sorting of proteins into the endosome; deletion mutant is sensitive to rapamycin and nystatin	II	3.15855	2.57426	2.11237	1.68993	0.157606	-0.494925	-0.98085			IV		28.6575	1.27109
YBR261C	TAE1	AdoMet-dependent proline methyltransferase; catalyzes the dimethylation of ribosomal proteins Rpl12 and Rps25 at N-terminal proline residues; has a role in protein synthesis; fusion protein localizes to the cytoplasm	II	3.07932	2.70599	1.47826	1.28666	1.20436	0.839454	-0.549056				IV	81.9314	3.63404
YOR210W	RPB10	RNA polymerase subunit ABC10-beta; common to RNA polymerases I, II, and III	II	4.53353	3.87226	3.06736	2.18459	1.49661	-0.842394	-1.84239	-2.88599				299.832	13.299
YDR037W	KRS1	Lysyl-tRNA synthetase	II	4.5264	3.63821	2.43241	0.24254	-0.658224	-1.00468	-1.80007	-2.24319		IV		802.464	35.593
YGR009C	SEC9	t-SNARE protein required for secretory vesicle-plasma membrane fusion; similar to but not functionally redundant with Spo20p; interacts non-exocyst bound Sec6p; SNAP-25 homolog	II	5.14882	4.47796	3.74164	2.97193	1.53079	0.157606	-1.49493	-1.80007		III		24.3569	1.08034
YDR016C	DAD1	Essential subunit of the Dam1 complex (aka DASH complex); complex couples kinetochores to the force produced by MT depolymerization thereby aiding in chromosome segregation; is transferred to the kinetochore prior to mitosis	II	4.99359	4.14088	3.37298	1.97063	0.77092	-0.055403	-1.84239	-2.30103		IV	I	46.6467	2.069
YOL097C	WRS1	Cytoplasmic tryptophanyl-tRNA synthetase; aminoacylates tryptophanyl-tRNA	II	6.38804	5.18225	3.99937	2.57366	1.56702	-0.885995	-1.56407	-2.88599		III	II	239.307	10.6144
YBL016W	FUS3	Mitogen-activated serine/threonine protein kinase involved in mating; phosphoactivated by Ste7p; substrates include Ste12p, Far1p, Bni1p, Sst2p; inhibits invasive growth during mating by phosphorylating Tec1p, promoting its; inhibits recruitment of Ste5p, Cdc42p-mediated asymmetry and mating morphogenesis	II	3.80486	2.99915	2.36452	1.88328	0.681931	-2.88599						63.2034	2.80336
YOR151C	RPB2	RNA polymerase II second largest subunit B150; part of central core; similar to bacterial beta subunit	II	3.94226	3.03655	2.0455	1.69678	1.31653	0.832745	0.635289	-1.24319			II	166.597	7.38936
YOL012C	HTZ1	Histone variant H2AZ; exchanged for histone H2A in nucleosomes by the SWR1 complex; involved in transcriptional regulation through prevention of the spread of silent heterochromatin; Htz1p-containing nucleosomes facilitate RNA Pol II passage by affecting correct assembly and modification status of RNA Pol II elongation complexes and by favoring efficient nucleosome remodeling	II	5.01254	3.89647	3.14738	1.40846	0.22215	-1.05356	-3.71898	-3.71898		III	I	134.271	5.95553
YGR037C	ACB1	Acyl-CoA-binding protein; transports newly synthesized acyl-CoA esters from fatty acid synthetase (Fas1p-Fas2p) to acyl-CoA-consuming processes; subject to starvation-induced, Grh1p-mediated unconventional secretion; protein abundance increases in response to DNA replication stress	II	3.65816	2.80343	1.66804	1.10764	0.564169	-0.564067	-2.30103	-2.30103	III	III	II	863.369	38.2945
YNL278W	CAF120	Part of the CCR4-NOT transcriptional regulatory complex; involved in controlling mRNA initiation, elongation, and degradation; CAF120 has a paralog, SKG3, that arose from the whole genome duplication	II	4.56378	3.46872	2.72892	2.14873	-1.24319						II	12.4366	0.551621
YHR144C	DCD1	Deoxycytidine monophosphate (dCMP) deaminase; involved in dUMP and dTMP biosynthesis; expression is NOT cell cycle regulated	II	4.32547	3.75428	3.18722	2.44191	2.0141	1.01411	-0.511902					39.0008	1.72987
YAL025C	MAK16	Essential nuclear protein; constituent of 66S pre-ribosomal particles; required for maturation of 25S and 5.8S rRNAs; required for maintenance of M1 satellite double-stranded RNA of the L-A virus	II	3.03282	2.65366	2.22101	1.54317	0.556046	-0.348244	-1.80007	-2.71898				63.9559	2.83674
YDL070W	BDF2	Protein involved in transcription initiation; acts at TATA-containing promoters; associates with the basal transcription factor TFIID; contains two bromodomains; corresponds to the C-terminal region of mammalian TAF1; redundant with Bdf1p; protein abundance increases in response to DNA replication stress; BDF2 has a paralog, BDF1, that arose from the whole genome duplication	II	4.703	3.87271	3.06836	2.46346	1.91949	-1.00468	-2.71898	-2.71898	IV	III	I	89.1663	3.95494
YOL120C	RPL18A	Ribosomal 60S subunit protein L18A; intron of RPL18A pre-mRNA forms stem-loop structures that are a target for Rnt1p cleavage leading to degradation; homologous to mammalian ribosomal protein L18, no bacterial homolog; RPL18A has a paralog, RPL18B, that arose from the whole genome duplication	II	4.21448	3.24792	2.95613	0.705241	-0.461558	-0.957405	-1.75896	-2.13402	IV	III	II	945.938	41.9568
YKR095W	MLP1	Myosin-like protein associated with the nuclear envelope; nuclear basket protein that connects the nuclear pore complex with the nuclear interior; involved with Tel1p in telomere length control; involved with Pml1p and Pml39p in nuclear retention of unspliced mRNAs; MLP1 has a paralog, MLP2, that arose from the whole genome duplication	II	5.15338	3.64479	3.20624	2.48897	1.39284	-1.30103	-1.30103	-1.56407		II	II	55.5197	2.46256
YPL050C	MNN9	Subunit of Golgi mannosyltransferase complex; this complex mediates elongation of the polysaccharide mannan backbone; forms a separate complex with Van1p that is also involved in backbone elongation; this complex also contains Anp1p, Mnn10p, Mnn11p, and Hoc1p	II	4.2793	3.57295	3.12498	2.32647	1.18946	0.078742	-1.49493	-2.24319				130.155	5.77298
YCL047C	POF1	Nicotinamide mononucleotide-specific adenylyltransferase (NMNAT); catalyzes the conversion of nicotinamide mononucleotide (NMN) to nicotinamide adenine dinucleotide (NAD+); role in the nicotinamide riboside (NR) salvage pathway of NAD+ biosynthesis; involved in NR and NAD+ homeostasis; ATPase involved in protein quality control and filamentation pathways; interacts physically with Kss1p and suppr…	II	3.26408	2.77643	1.98974	1.24254	-0.07864	-1.07864						25.533	1.13251
YOR046C	DBP5	Cytoplasmic ATP-dependent RNA helicase of the DEAD-box family; involved in mRNA export from the nucleus, remodeling messenger ribonucleoprotein particles (mRNPs), with ATPase activity stimulated by Gle1p, IP6 and Nup159p; involved in translation termination along with Sup45p (eRF1); role in the cellular response to heat stress	II	3.04136	2.26228	1.73433	1.3505	0.790801	-0.584536	-0.584536	-0.584536			III	215.442	9.55584
YPL061W	ALD6	Cytosolic aldehyde dehydrogenase; activated by Mg2+ and utilizes NADP+ as the preferred coenzyme; required for conversion of acetaldehyde to acetate; constitutively expressed; locates to the mitochondrial outer surface upon oxidative stress	II	4.12988	2.66936	1.79234	1.0844	0.262646	-1.52908	-1.84239	-2.88599			IV	1238.33	54.9259
YLR409C	UTP21	Subunit of U3-containing 90S preribosome and SSU processome complexes; involved in production of 18S rRNA and assembly of small ribosomal subunit; synthetic defect with STI1 Hsp90 cochaperone; human homolog linked to glaucoma; Small Subunit processome is also known as SSU processome	II	5.45204	4.39739	3.46623	2.27965	1.80902	-0.529081	-2.80007			III	IV	107.507	4.76846
YNL329C	PEX6	AAA-peroxin; heterodimerizes with AAA-peroxin Pex1p and participates in the recycling of peroxisomal signal receptor Pex5p from the peroxisomal membrane to the cystosol; mutations in human PEX6 can lead to severe peroxisomal disorders and early death	II	3.63957	3.30168	2.26938	2.18342	0.547877	-2.71898	-2.71898	-2.71898				22.9749	1.01904
YIL075C	RPN2	Subunit of the 26S proteasome; substrate of the N-acetyltransferase Nat1p; protein abundance increases in response to DNA replication stress	II	5.05673	4.41317	3.44048	2.52425	0.952637	0.313143	-1.30103	-1.886		II		160.37	7.11315
YKL056C	TMA19	Protein that associates with ribosomes; homolog of translationally controlled tumor protein; green fluorescent protein (GFP)-fusion protein localizes to the cytoplasm and relocates to the mitochondrial outer surface upon oxidative stress	II	5.0556	3.8611	2.74766	1.64028	0.597382	-0.842394	-1.52908	-2.88599		IV	II	3453.46	153.177
YHR011W	DIA4	Probable mitochondrial seryl-tRNA synthetase; mutant displays increased invasive and pseudohyphal growth	II	4.94976	3.68845	2.87979	2.50804	1.99097	1.55424	-1.42894	-2.18757	II	III	III	12.0118	0.532778
YPR019W	MCM4	Essential helicase component of heterohexameric MCM2-7 complexes; MCM2-7 complexes bind pre-replication complexes on DNA and melt DNA prior to replication; forms an Mcm4p-6p-7p subcomplex; shows nuclear accumulation in G1; homolog of S. pombe Cdc21p	II	4.11634	3.5721	2.87562	2.10404	1.03763	-0.546468	-1.886	-2.88599			II	44.3144	1.96555
YPR052C	NHP6A	High-mobility group (HMG) protein; binds to and remodels nucleosomes; involved in recruiting FACT and other chromatin remodelling complexes to chromosomes; functionally redundant with Nhp6Bp; required for transcriptional initiation fidelity of some tRNA genes; homologous to mammalian HMGB1 and HMGB2; NHP6A has a paralog, NHP6B, that arose from the whole genome duplication; protein abundance incre…	II	4.71996	3.94488	3.16603	2.20888	1.2832	0.332295	-1.18757	-1.71898			I	154.414	6.84896
YOR232W	MGE1	Mitochondrial matrix cochaperone; nucleotide release factor for Ssc1p in protein translocation and folding; also acts as cochaperone for Ssq1p in folding of Fe-S cluster proteins; acts as oxidative sensor to regulate mitochondrial Ssc1p; in presence of oxidative stress, dimeric Mge1p becomes a monomer and unable to regulate Ssc1p function; homolog of E. coli GrpE and human Mge1 (GRPEL1), which al…	II	4.9902	4.13056	3.29699	2.85517	1.8735	0.230873	-1.16055	-1.71898	II	III		315.913	14.0122
YER165W	PAB1	Poly(A) binding protein; part of the 3'-end RNA-processing complex, mediates interactions between the 5' cap structure and the 3' mRNA poly(A) tail, involved in control of poly(A) tail length, interacts with translation factor eIF-4G; stimulates, but is not required for the deadenylation activity of the Pan2p-Pan3p poly(A)-ribonuclease complex	II	4.00684	3.09482	2.42698	-0.529081	-0.842394	-0.842394	-2.18757	-2.18757		III	II	1025.6	45.4903
YLL024C	SSA2	ATP-binding protein; involved in protein folding and vacuolar import of proteins; member of heat shock protein 70 (HSP70) family; associated with the chaperonin-containing T-complex; present in the cytoplasm, vacuolar membrane and cell wall; 98% identical to paralog Ssa1p, but has distinct functional specificity in propagation of yeast [URE3] prions and vacuolar-mediated degradation of gluconeoge…	II	3.61689	2.55808	1.96451	0.87447	0.112368	-0.18757	-0.98085	-1.84239			IV	1480.67	65.6746
YCR057C	PWP2	Conserved 90S pre-ribosomal component; essential for proper endonucleolytic cleavage of the 35 S rRNA precursor at A0, A1, and A2 sites; contains eight WD-repeats; PWP2 deletion leads to defects in cell cycle and bud morphogenesis	II	4.00601	3.46487	2.56244	1.72818	0.706327	0.51473	-0.426563			IV	II	130.983	5.80971
YOL086C	ADH1	Alcohol dehydrogenase; fermentative isozyme active as homo- or heterotetramers; required for the reduction of acetaldehyde to ethanol, the last step in the glycolytic pathway; ADH1 has a paralog, ADH5, that arose from the whole genome duplication	II	5.22385	3.94038	2.96712	1.72349	1.00131	-0.145262	-0.529081	-1.30103				7949.72	352.607
YGL135W	RPL1B	Ribosomal 60S subunit protein L1B; N-terminally acetylated; homologous to mammalian ribosomal protein L10A and bacterial L1; RPL1B has a paralog, RPL1A, that arose from the whole genome duplication; rpl1a rpl1b double null mutation is lethal	II	3.53255	2.68062	1.39351	0.945517	0.252628	-0.546468	-1.56407	-2.30103	IV		III	214.167	9.49929
YPL232W	SSO1	Plasma membrane t-SNARE; involved in fusion of secretory vesicles at the plasma membrane and in vesicle fusion during sporulation; forms a complex with Sec9p that binds v-SNARE Snc2p; syntaxin homolog; functionally redundant with Sso2p; SSO1 has a paralog, SSO2, that arose from the whole genome duplication	II	4.2794	3.36753	2.50867	1.18946	-0.445159	-2.18757				IV		96.3359	4.27295
YOR144C	ELG1	Subunit of an alternative replication factor C complex; important for DNA replication and genome integrity; suppresses spontaneous DNA damage; involved in homologous recombination-mediated repair and telomere homeostasis; required for PCNA (Pol30p) unloading during DNA replication	II	4.39714	4.02902	3.56181	1.62756	0.01915	-0.303215	-0.957405			IV		18.0904	0.802394
YBR208C	DUR1,2	Urea amidolyase; contains both urea carboxylase and allophanate hydrolase activities, degrades urea to CO2 and NH3; expression sensitive to nitrogen catabolite repression and induced by allophanate, an intermediate in allantoin degradation; protein abundance increases in response to DNA replication stress	II	3.09321	2.78534	1.35917	0.969276	0.912203	0.804581	0.602947	-2.71898				29.1497	1.29293
YDR157W		Dubious open reading frame; unlikely to encode a functional protein, based on available experimental and comparative sequence data	II	5.37879	4.5828	4.03043	2.95373	1.6485	0.020896	-2.30103	-2.88599		III		7.36332	0.326598
YMR033W	ARP9	Component of both the SWI/SNF and RSC chromatin remodeling complexes; actin-related protein involved in transcriptional regulation	II	4.28571	3.54564	2.76663	1.74151	-0.171999	-1.05356	-3.88599	-3.88599	IV	II	II	60.7212	2.69327
YGL049C	TIF4632	Translation initiation factor eIF4G; subunit of the mRNA cap-binding protein complex (eIF4F) that also contains eIF4E (Cdc33p); associates with the poly(A)-binding protein Pab1p, also interacts with eIF4A (Tif1p); TIF4632 has a paralog, TIF4631, that arose from the whole genome duplication	II	4.72751	3.80892	2.70497	1.83374	1.19993	0.46964	-2.30103	-2.30103		III		67.9399	3.01345
YDR398W	UTP5	Subunit of U3-containing Small Subunit (SSU) processome complex; involved in production of 18S rRNA and assembly of small ribosomal subunit	II	3.44643	3.01004	2.29961	1.40712	1.20513	-0.041188	-1.56407	-1.56407			III	109.953	4.87691
YPL211W	NIP7	Nucleolar protein required for 60S ribosome subunit biogenesis; constituent of 66S pre-ribosomal particles; physically interacts with Nop8p and the exosome subunit Rrp43p	II	5.81592	4.99408	4.16714	2.71466	0.828001	-0.71607	-1.886			III		240.744	10.6781
YOL004W	SIN3	Component of both the Rpd3S and Rpd3L histone deacetylase complexes; involved in transcriptional repression and activation of diverse processes, including mating-type switching and meiosis; involved in the maintenance of chromosomal integrity	II	4.66834	3.91485	2.92919	1.68193	1.04259	-0.461558	-3.88599			IV	II	78.6202	3.48717
YGL089C	MF(ALPHA)2	Mating pheromone alpha-factor, made by alpha cells; interacts with mating type a cells to induce cell cycle arrest and other responses leading to mating; also encoded by MF(ALPHA)1, which is more highly expressed; MF(ALPHA)2 has a paralog, MF(ALPHA)1, that arose from the whole genome duplication	II	3.99562	3.40227	2.45443	2.17814	0.675555	-0.171999	-2.80007	-3.71898	III			1030.11	45.6901
YDR155C	CPR1	Cytoplasmic peptidyl-prolyl cis-trans isomerase (cyclophilin); catalyzes the cis-trans isomerization of peptide bonds N-terminal to proline residues; binds the drug cyclosporin A; N-terminally propionylated in vivo; protein abundance increases in response to DNA replication stress	II	4.83221	4.04187	3.13572	2.31172	1.85327	0.321334	-0.055403	-2.88599	III	III	III	935.756	41.5051
YPL131W	RPL5	Ribosomal 60S subunit protein L5; homologous to mammalian ribosomal protein L5 and bacterial L18; binds 5S rRNA and is required for 60S subunit assembly	II	4.30273	3.53328	3.17834	2.08722	1.55136	0.13597	-0.410556	-0.71607			II	4759.38	211.101
YEL036C	ANP1	Subunit of the alpha-1,6 mannosyltransferase complex; type II membrane protein; has a role in retention of glycosyltransferases in the Golgi; involved in osmotic sensitivity and resistance to aminonitrophenyl propanediol	II	5.29436	3.8112	2.635	0.97018	0.546665	0.077064					I	80.872	3.58705
YGR118W	RPS23A	Ribosomal protein 28 (rp28) of the small (40S) ribosomal subunit; required for translational accuracy; homologous to mammalian ribosomal protein S23 and bacterial S12; RPS23A has a paralog, RPS23B, that arose from the whole genome duplication; deletion of both RPS23A and RPS23B is lethal	II	4.60051	3.80045	3.1402	2.49598	1.64794	0.211846	-0.564067	-0.885995			III	668.267	29.6408
YJL033W	HCA4	DEAD box RNA helicase; component of the SSU; interacts with Bfr2p and Enp2p; high-copy number suppression of a U14 snoRNA processing mutant suggests an involvement in 18S rRNA synthesis	II	5.16565	3.78215	2.52216	0.939285	-0.201274	-0.445159	-2.24319	-2.88599		III		120.063	5.32538
YOL136C	PFK27	6-phosphofructo-2-kinase; catalyzes synthesis of fructose-2,6-bisphosphate; inhibited by phosphoenolpyruvate and sn-glycerol 3-phosphate, expression induced by glucose and sucrose, transcriptional regulation involves protein kinase A	II	4.62555	3.6434	2.17814	0.351196	0.078742	-1.52908	-1.886	-1.886		IV		70.6936	3.13559
YDR440W	DOT1	Nucleosomal histone H3-Lys79 methylase; methylation is required for telomeric silencing, meiotic checkpoint control, and DNA damage response	II	3.43397	2.64326	2.3761	2.25366	1.34981	-1.24319	-2.30103	-3.88599			III	25.0453	1.11088
YIL094C	LYS12	Homo-isocitrate dehydrogenase; an NAD-linked mitochondrial enzyme required for the fourth step in the biosynthesis of lysine, in which homo-isocitrate is oxidatively decarboxylated to alpha-ketoadipate	II	3.25244	2.1096	1.74866	1.38827	1.3505	1.30689	0.271128	0.187909				172.575	7.65451
YGR209C	TRX2	Cytoplasmic thioredoxin isoenzyme; part of thioredoxin system which protects cells against oxidative and reductive stress; forms LMA1 complex with Pbi2p; acts as a cofactor for Tsa1p; required for ER-Golgi transport and vacuole inheritance; with Trx1p, facilitates mitochondrial import of small Tims Tim9p, Tim10p, Tim13p by maintaining them in reduced form; abundance increases under DNA replicatio…	II	4.75742	3.69205	3.27383	2.25011	1.51768	0.636429	-0.529081	-2.30103		III	III	687.358	30.4876
YBL076C	ILS1	Cytoplasmic isoleucine-tRNA synthetase; target of the G1-specific inhibitor reveromycin A	II	5.8885	4.57726	3.24306	0.946436	-0.696529	-2.80007			III	III	II	722.227	32.0341
YAL032C	PRP45	Protein required for pre-mRNA splicing; associates with the spliceosome and interacts with splicing factors Prp22p and Prp46p; orthologous to human transcriptional coactivator SKIP and can activate transcription of a reporter gene	II	4.48915	3.96482	3.47627	3.22704	2.0221	0.97018	-1.52908	-3.88599			II	22.4273	0.994756
YBL063W	KIP1	Kinesin-related motor protein; required for mitotic spindle assembly, chromosome segregation, and 2 micron plasmid partitioning; functionally redundant with Cin8p for chromosomal but not plasmid functions	II	4.06712	3.09845	2.24937	1.02505	0.46964	0.321334	0.065666	-0.043011		IV	IV	13.618	0.604024
YNL075W	IMP4	Component of the SSU processome; SSU processome is required for pre-18S rRNA processing; interacts with Mpp10p; member of a superfamily of proteins that contain a sigma(70)-like motif and associate with RNAs	II	4.01386	3.1823	2.24685	1.94194	-0.529081	-2.30103	-2.88599	-2.88599			II	127.104	5.63765
YPL260W		Putative substrate of cAMP-dependent protein kinase (PKA); green fluorescent protein (GFP)-fusion protein localizes to the cytoplasm and nucleus; YPL260W is not an essential gene; protein abundance increases in response to DNA replication stress	II	3.78974	2.95218	1.76441	1.16909	0.453532	-1.56407	-2.88599		IV			68.2728	3.02822
YHR137W	ARO9	Aromatic aminotransferase II; catalyzes the first step of tryptophan, phenylalanine, and tyrosine catabolism	II	5.05208	4.10919	3.37841	1.55076	0.892983	-0.147222	-2.13402		IV	III	III	27.4898	1.2193
YNL079C	TPM1	Major isoform of tropomyosin; binds to and stabilizes actin cables and filaments, which direct polarized cell growth and the distribution of several organelles; acetylated by the NatB complex and acetylated form binds actin most efficiently; TPM1 has a paralog, TPM2, that arose from the whole genome duplication	II	3.90004	3.41197	2.46812	2.12656	1.77391	1.55484	-1.24319	-3.88599		III		509.487	22.5981
YER117W	RPL23B	Ribosomal 60S subunit protein L23B; homologous to mammalian ribosomal protein L23 and bacterial L14; RPL23B has a paralog, RPL23A, that arose from the whole genome duplication	II	3.65436	2.67152	1.90084	1.49661	0.995317	-0.119012	-0.478145			IV	II	864.901	38.3624
YDL179W	PCL9	Cyclin; forms a functional kinase complex with Pho85p cyclin-dependent kinase (Cdk), expressed in late M/early G1 phase, activated by Swi5p; PCL9 has a paralog, PCL2, that arose from the whole genome duplication	II	4.517	3.61939	2.95636	2.22063	1.70102	0.322751	-0.028917	-1.80007		III		31.7947	1.41024
YPR189W	SKI3	Ski complex component and TPR protein; mediates 3'-5' RNA degradation by the cytoplasmic exosome; null mutants have superkiller phenotype of increased viral dsRNAs and are synthetic lethal with mutations in 5'-3' mRNA decay; mutations in the human ortholog, TTC37, causes Syndromic diarrhea/Trichohepatoenteric (SD/THE) syndrome	II	3.7558	2.83591	2.3659	1.65992	1.29789	-0.201274					IV	39.4756	1.75093
YPR016C	TIF6	Constituent of 66S pre-ribosomal particles; has similarity to human translation initiation factor 6 (eIF6); may be involved in the biogenesis and or stability of 60S ribosomal subunits	II	4.68448	4.07214	3.25495	2.07832	0.87447	-0.511902	-1.84239	-1.84239				367.499	16.3003
YJL189W	RPL39	Ribosomal 60S subunit protein L39; required for ribosome biogenesis; loss of both Rpl31p and Rpl39p confers lethality; also exhibits genetic interactions with SIS1 and PAB1; homologous to mammalian ribosomal protein L39, no bacterial homolog	II	3.47723	2.57254	2.05257	1.25263	0.303471	-0.86403	-2.80007	-3.71898			IV	1239.5	54.9775
YBR025C	OLA1	P-loop ATPase with similarity to human OLA1 and bacterial YchF; identified as specifically interacting with the proteasome; null mutant displays increased translation rate and increased readthrough of premature stop codons; protein abundance increases in response to hydrogen peroxide and to DNA replication stress	II	3.28844	2.86859	2.6588	1.18342	0.321334	-0.067902	-0.779369	-1.49493	IV		III	799.458	35.4597
YOR117W	RPT5	ATPase of the 19S regulatory particle of the 26S proteasome; one of six ATPases of the regulatory particle; involved in the degradation of ubiquitinated substrates; recruited to the GAL1-10 promoter region upon induction of transcription; similar to human TBP1	II	4.76079	3.91623	2.94442	2.34449	1.41296	0.22215	-1.80007			IV		175.54	7.78602
YHR174W	ENO2	Enolase II, a phosphopyruvate hydratase; catalyzes conversion of 2-phosphoglycerate to phosphoenolpyruvate during glycolysis and the reverse reaction during gluconeogenesis; expression induced in response to glucose; ENO2 has a paralog, ENO1, that arose from the whole genome duplication	II	3.74254	3.08236	2.33634	1.17284	0.938361	0.486835	-1.42894	-1.42894		IV		10513.8	466.336
YBR191W	RPL21A	Ribosomal 60S subunit protein L21A; homologous to mammalian ribosomal protein L21, no bacterial homolog; RPL21A has a paralog, RPL21B, that arose from the whole genome duplication	II	4.55778	3.64712	2.80095	1.91043	0.995317	-0.243186	-1.18757	-1.80007			III	1447.83	64.2178
YHR108W	GGA2	Protein that regulates Arf1p, Arf2p to facilitate Golgi trafficking; binds phosphatidylinositol 4-phosphate, which plays a role in TGN localization; has homology to gamma-adaptin; GGA2 has a paralog, GGA1, that arose from the whole genome duplication	II	4.75693	3.90712	1.9962	0.444759	-0.07864	-1.30103	-2.88599			IV		130.701	5.79721
YEL021W	URA3	Orotidine-5'-phosphate (OMP) decarboxylase; catalyzes the sixth enzymatic step in the de novo biosynthesis of pyrimidines, converting OMP into uridine monophosphate (UMP); converts 5-FOA into 5-fluorouracil, a toxic compound	II	4.40308	4.09032	3.43335	2.92312	0.764927	-0.07864	-2.88599			III	IV	0.117289	0.00520233
YOR110W	TFC7	RNA pol III transcription initiation factor complex (TFIIIC) subunit; part of the TauA globular domain of TFIIIC that binds DNA at the BoxA promoter sites of tRNA and similar genes; TFC7 has a paralog, YNL108C, that arose from the whole genome duplication	II	4.10442	2.83685	2.27718	1.23597	0.503827	0.433313	0.261169	0.077064			III	28.4483	1.26182
YJR145C	RPS4A	Protein component of the small (40S) ribosomal subunit; mutation affects 20S pre-rRNA processing; homologous to mammalian ribosomal protein S4, no bacterial homolog; RPS4A has a paralog, RPS4B, that arose from the whole genome duplication	II	4.23391	3.20571	2.15721	1.07306	-0.243186	-1.49493	-2.24319	-3.71898		IV	III	993.756	44.0777
YER110C	KAP123	Karyopherin beta; mediates nuclear import of ribosomal proteins prior to assembly into ribosomes and import of histones H3 and H4; localizes to the nuclear pore, nucleus, and cytoplasm; exhibits genetic interactions with RAI1	II	5.9187	5.05712	3.48426	2.19732	1.01411	0.007282	-1.52908	-2.30103		II	II	401.026	17.7874
YBL023C	MCM2	Protein involved in DNA replication; component of the Mcm2-7 hexameric helicase complex that binds chromatin as a part of the pre-replicative complex; relative distribution to the nucleus increases upon DNA replication stress	II	5.10507	3.92997	2.84736	2.15681	1.46595	0.434624	-0.658224	-2.30103		IV	I	37.6046	1.66794
YDL201W	TRM8	Noncatalytic subunit of a tRNA methyltransferase complex; Trm8p and Trm82p comprise an enzyme that catalyzes a methyl-transfer from S-adenosyl-l-methionine to the N(7) atom of guanine at position 46 in tRNA; Trm8 lacks catalytic activity if not bound to Trm82p	II	5.50624	4.61233	3.78154	2.06778	1.0022	0.303471	-0.885995	-1.886		IV	III	139.465	6.18592
YBR222C	PCS60	Oxalyl-CoA synthetase; capable of catalyzing conversion of oxalate to oxalyl-CoA; catalyzes first step in pathway of oxalate degradation that functions to protect yeast from inhibitory effects of oxalate; peroxisomal protein that binds mRNA; localizes to both peroxisomal peripheral membrane and matrix, expression is highly inducible by oleic acid; similar to E. coli long chain acyl-CoA synthetase	II	5.8536	4.78518	4.05706	2.25653	0.924875	-0.718981				IV		70.6991	3.13583
YKL114C	APN1	Major apurinic/apyrimidinic endonuclease; 3'-repair diesterase; involved in repair of DNA damage by oxidation and alkylating agents; also functions as a 3'-5' exonuclease to repair 7,8-dihydro-8-oxodeoxyguanosine; genetically interacts with NTG1 to maintain mitochondrial genome integrity	II	5.79633	4.8944	3.92189	2.65584	1.63643	0.178922	-2.88599	-3.88599		III		52.3031	2.31989
YOL052C	SPE2	S-adenosylmethionine decarboxylase; required for the biosynthesis of spermidine and spermine; cells lacking Spe2p require spermine or spermidine for growth in the presence of oxygen but not when grown anaerobically	II	5.26876	4.18615	3.34663	1.82988	0.24254	-0.821078	-3.71898	-3.71898	IV	IV	III	60.6599	2.69055
YOR342C		Protein of unknown function; green fluorescent protein (GFP)-fusion protein localizes to the cytoplasm and the nucleus; relocalizes from nucleus to cytoplasm upon DNA replication stress; YOR342C has a paralog, YAL037W, that arose from the whole genome duplication	II	3.82024	3.27154	2.55401	1.89441	0.964961	0.425735	-1.46156	-1.46156				80.8435	3.58579
YBR281C	DUG2	Component of glutamine amidotransferase (GATase II); forms a complex with Dug3p to degrade glutathione (GSH) and other peptides containing a gamma-glu-X bond in an alternative pathway to GSH degradation by gamma-glutamyl transpeptidase (Ecm38p)	II	2.69651	1.79131	1.70416	1.61139	1.57909	-1.05356	-2.30103	-2.30103				28.0064	1.24222
YOR101W	RAS1	GTPase involved in G-protein signaling in adenylate cyclase activation; plays a role in cell proliferation; localized to the plasma membrane; homolog of mammalian RAS proto-oncogenes; relative distribution to the nucleus increases upon DNA replication stress; RAS1 has a paralog, RAS2, that arose from the whole genome duplication	II	4.34318	3.6259	3.249	1.46467	-0.288513	-0.549056	-0.549056	-0.549056			I	129.357	5.73759
YDR188W	CCT6	Subunit of the cytosolic chaperonin Cct ring complex; related to Tcp1p, essential protein that is required for the assembly of actin and tubulins in vivo; contains an ATP-binding motif	II	4.26622	3.56259	2.78765	1.97154	1.0022	-0.158568	-0.696529	-1.56407				191.816	8.50793
YPR161C	SGV1	Cyclin (Bur2p)-dependent protein kinase; part of the BUR kinase complex which functions in transcriptional regulation; phosphorylates the carboxy-terminal domain (CTD) of Rpo21p and the C-terminal repeat domain of Spt5p; recruits Spt6p to the CTD at the onset of transcription; regulated by Cak1p; similar to metazoan CDK9 proteins	II	5.18357	4.18635	3.1098	2.39579	1.77792	-0.800073	-3.88599			II	IV	48.8247	2.1656
YLR044C	PDC1	Major of three pyruvate decarboxylase isozymes; key enzyme in alcoholic fermentation; decarboxylates pyruvate to acetaldehyde; involved in amino acid catabolism; subject to glucose-, ethanol-, and autoregulation; activated by phosphorylation in response to glucose levels; N-terminally propionylated in vivo	II	4.4675	3.22761	2.30724	0.951722	-0.145262	-0.842394	-1.02892	-1.886	III	IV	III	13857.1	614.627
YGL226C-A	OST5	Zeta subunit of the oligosaccharyltransferase complex of the ER lumen; complex catalyzes asparagine-linked glycosylation of newly synthesized proteins	II	3.52394	2.66692	1.59283	1.21108	0.983251	-0.363571	-1.56407	-1.886	IV	IV	III	115.033	5.10227
YJR041C	URB2	Protein required for normal metabolism of the rRNA primary transcript; nucleolar protein; proposed to be involved in ribosome biogenesis	II	5.28816	4.01015	3.16198	1.47396	0.748655	-0.303215	-2.30103	-2.88599		III		61.0878	2.70953
YGR264C	MES1	Methionyl-tRNA synthetase; forms a complex with glutamyl-tRNA synthetase (Gus1p) and Arc1p, which increases the catalytic efficiency of both tRNA synthetases; also has a role in nuclear export of tRNAs; mutations in human ortholog MARS are associated with pediatric pulmonary alveolar proteinosis	III	2.84137	1.70782	1.54606								II	421.398	18.691
YDR381W	YRA1	Nuclear polyadenylated RNA-binding protein; required for export of poly(A)+ mRNA from the nucleus; proposed to couple mRNA export with 3' end processing via its interactions with Mex67p and Pcf11p; interacts with DBP2; inhibits the helicase activity of Dbp2; functionally redundant with Yra2p, another REF family member	III	3.39237	2.18156	1.70891	0.425735	-1.27182	-2.24319	-2.24319	-2.88599			I	165.306	7.33207
YDR121W	DPB4	Subunit of DNA pol epsilon and of ISW2 chromatin accessibility complex; involved in both chromosomal DNA replication and inheritance of telomeric silencing; stabilizes the interaction of Pol epsilon with primer-template DNA, positively affecting the processivity of the polymerase and exonuclease activities of Pol epsilon; interacts with extranucleosomal DNA and acts as anchor point for ISW2 compl…	III	2.3984	2.09004	1.49598	1.22576	-1.84239	-3.88599	-3.88599				III	51.039	2.26382
YEL037C	RAD23	Protein with ubiquitin-like N terminus; subunit of Nuclear Excision Repair Factor 2 (NEF2) with Rad4p that binds damaged DNA; enhances protein deglycosylation activity of Png1p; also involved, with Rad4p, in ubiquitylated protein turnover	III	2.76891	1.78887	1.1179	1.07222	-1.84239	-2.30103	-2.88599				III	141.593	6.28031
YNL096C	RPS7B	Protein component of the small (40S) ribosomal subunit; interacts with Kti11p; deletion causes hypersensitivity to zymocin; homologous to mammalian ribosomal protein S7, no bacterial homolog; RPS7B has a paralog, RPS7A, that arose from the whole genome duplication; protein abundance increases in response to DNA replication stress	III	3.92189	3.08602	1.65612	0.77092	-0.348244	-1.75896	-3.88599	-3.88599				484.615	21.4949
YOR091W	TMA46	Protein of unknown function that associates with translating ribosomes; interacts with GTPase Rbg1p	III	3.19732	2.37217	2.0372	-0.066048	-0.546468	-1.07864			III	IV	IV	138.652	6.14985
YER093C	TSC11	Subunit of TORC2 (Tor2p-Lst8p-Avo1-Avo2-Tsc11p-Bit61p); TORC2 is a membrane-associated complex that regulates actin cytoskeletal dynamics during polarized growth and cell wall integrity; involved in sphingolipid metabolism; contains a RasGEFN domain	III	3.12615	1.71986	0.146829	-0.394724	-1.24319	-2.30103						19.348	0.858173
YBL089W	AVT5	Putative transporter; member of a family of seven S. cerevisiae genes (AVT1-7) related to vesicular GABA-glycine transporters; AVT5 has a paralog, AVT6, that arose from the whole genome duplication	III	1.9321	1.73739	1.5831	1.48192	-2.88599							17.8527	0.79185
YMR083W	ADH3	Mitochondrial alcohol dehydrogenase isozyme III; involved in the shuttling of mitochondrial NADH to the cytosol under anaerobic conditions and ethanol production	III	2.62007	2.13436	1.68193	-0.564067	-1.30103	-1.56407	-3.88599	-3.88599	III			427.297	18.9526
YEL053C	MAK10	Non-catalytic subunit of N-terminal acetyltransferase of the NatC type; required for replication of dsRNA virus; expression is glucose-repressible	III	2.49205	2.11513	0.571055	-0.738831	-2.13402	-2.13402						37.5445	1.66527
YJL154C	VPS35	Endosomal subunit of membrane-associated retromer complex; required for retrograde transport; receptor that recognizes retrieval signals on cargo proteins, forms subcomplex with Vps26p and Vps29p that selects cargo proteins for retrieval; interacts with Ypt7p	III	3.16732	2.04012	0.748655	-0.030724								64.8956	2.87842
YML031W	NDC1	Subunit of the transmembrane ring of the nuclear pore complex (NPC); contributes to nucleocytoplasmic transport, NPC biogenesis and spindle pole body duplication; homologous to human NDC1	III	3.26708	2.22358	1.82988	0.727111	-1.886							56.6824	2.51413
YBL087C	RPL23A	Ribosomal 60S subunit protein L23A; homologous to mammalian ribosomal protein L23 and bacterial L14; RPL23A has a paralog, RPL23B, that arose from the whole genome duplication	III	3.44708	2.37943	1.40712	0.748655	-1.24319	-3.88599	-3.88599	-3.88599			IV	706.446	31.3342
YLR429W	CRN1	Coronin; cortical actin cytoskeletal component that associates with the Arp2p/Arp3p complex to regulate its activity; plays a role in regulation of actin patch assembly	III	2.97301	2.1587	1.8428	1.07706	-2.88599	-3.88599						115.302	5.11419
YEL032W	MCM3	Protein involved in DNA replication; component of the Mcm2-7 hexameric helicase complex that binds chromatin as a part of the pre-replicative complex	III	2.67979	2.25366	2.25366	1.97583	-1.27182	-1.886					II	63.1082	2.79914
YEL017W	GTT3	Protein of unknown function may be involved in glutathione metabolism; function suggested by computational analysis of large-scale protein-protein interaction data; GFP-fusion protein localizes to the nuclear periphery	III	1.69788	1.05503	0.906769	-0.98085	-0.98085	-0.98085	-3.88599	-3.88599			III	38.7818	1.72016
YLR200W	YKE2	Subunit of the heterohexameric Gim/prefoldin protein complex; involved in the folding of alpha-tubulin, beta-tubulin, and actin; prefoldin complex also localizes to chromatin of actively transcribed genes in the nucleus and facilitates transcriptional elongation	III	2.91361	1.32753	0.854738	0.232381	-0.145262	-1.886	-3.88599				II	109.012	4.83518
YDR389W	SAC7	GTPase activating protein (GAP) for Rho1p; regulator of a Tor2p-mediated, Rho1p GTPase switch that controls organization of the actin cytoskeleton; negative regulator of the RHO1-PKC1-MAPK cell integrity (CWI) and membrane fluidity homeostasis signaling pathways; potential Cdc28p substrate; SAC7 has a paralog, BAG7, that arose from the whole genome duplication	III	2.66097	2.25691	1.57567	1.2461	-3.88599	-3.88599					II	47.3774	2.10141
YKL094W	YJU3	Monoglyceride lipase (MGL); functional ortholog of mammalian MGL, localizes to lipid particles and membranes, also member of the eukaryotic serine hydrolase family	III	1.65176	1.45224	1.45224	-0.494925	-1.02892	-2.71898	-2.71898					97.5774	4.32801
YJL102W	MEF2	Mitochondrial elongation factor involved in translational elongation	III	3.00237	2.27434	1.89298	0.424416	-0.273959	-3.88599	-3.88599	-3.88599				6.04486	0.268118
YKL214C	YRA2	Member of the REF (RNA and export factor binding proteins) family; when overexpressed, can substitute for the function of Yra1p in export of poly(A)+ mRNA from the nucleus	III	1.2569	1.12889	0.919489	0.919489	0.748655	-3.88599					III	68.4843	3.0376
YGR033C	TIM21	Nonessential component of the TIM23 complex; interacts with the Translocase of the Outer Mitochondrial membrane (TOM complex) and with respiratory enzymes; may regulate the Translocase of the Inner Mitochondrial membrane (TIM23 complex) activity	III	2.83567	1.77092	0.571055	-0.779369	-1.46156	-2.80007	-3.88599	-3.88599			IV	84.9857	3.76951
YMR312W	ELP6	Subunit of hexameric RecA-like ATPase Elp456 Elongator subcomplex; which is required for modification of wobble nucleosides in tRNA; required for Elongator structural integrity	III	1.54727	1.15143	1.01323	0.495356	0.415464	-3.88599						42.4121	1.88117
YDR454C	GUK1	Guanylate kinase; converts GMP to GDP; required for growth and mannose outer chain elongation of cell wall N-linked glycoproteins	III	3.43364	0.806607	0.398736	0.232381	-1.07864	-2.88599					IV	483.376	21.44
YJL001W	PRE3	Beta 1 subunit of the 20S proteasome; responsible for cleavage after acidic residues in peptides	III	2.05588	1.12422	0.933025	0.123405	-1.84239	-1.84239	-3.71898				III	159.962	7.09505
YDL104C	QRI7	Protein involved in threonylcarbamoyl adenosine biosynthesis; Sua5p and Qri7p are necessary and sufficient for RNA t6A modification in vitro; highly conserved mitochondrial protein; essential for t6A modification of mitochondrial tRNAs that decode ANN codons; similar to Kae1p and E. coli YgjD, both of which are also required for tRNA t6A modification; when directed to the cytoplasm, complements t…	III	2.87514	1.96667	1.45159	0.220631	-3.88599	-3.88599	-3.88599		II			6.69603	0.297
YGR240C	PFK1	Alpha subunit of heterooctameric phosphofructokinase; involved in glycolysis, indispensable for anaerobic growth, activated by fructose-2,6-bisphosphate and AMP, mutation inhibits glucose induction of cell cycle-related genes	III	4.33533	3.32939	2.49386	1.22576	-2.30103	-2.88599	-2.88599	-3.88599		IV		718.72	31.8786
YOR274W	MOD5	Delta 2-isopentenyl pyrophosphate:tRNA isopentenyl transferase; required for biosynthesis of isopentenyladenosine in mitochondrial and cytoplasmic tRNAs; also has a role in tRNA gene-mediated silencing; gene encodes two isozymic forms; converts to a prion form, prion conversion contributes to azole antifungal resistance by upregulating ergosterol biosynthesis; homolog of human TRIT1, a mutation i…	III	3.45192	2.53875	2.21032	1.41546	-2.30103	-2.88599	-3.88599	-3.88599				24.918	1.10523
YKR083C	DAD2	Essential subunit of the Dam1 complex (aka DASH complex); complex couples kinetochores to the force produced by MT depolymerization thereby aiding in chromosome segregation; is transferred to the kinetochore prior to mitosis	III	2.62899	2.26052	1.77895	1.05588	-0.286352	-1.07864	-2.88599					27.3087	1.21127
YNL138W	SRV2	CAP (cyclase-associated protein); N-terminus binds adenylate cyclase and facilitates activation by RAS; N-terminus forms novel hexameric star-shaped shuriken structures that directly catalyze cofilin-mediated severing of actin filaments; C-terminus, in physically and genetically separate activity, binds and recycles cofilin bound, ADP-actin monomers, facilitating regulation of actin dynamics and …	III	3.95181	2.9603	0.313143	-0.885995	-1.30103	-3.88599	-3.88599	-3.88599		IV	III	173.694	7.70413
YAR002W	NUP60	FG-nucleoporin component of central core of the nuclear pore complex; contributes directly to nucleocytoplasmic transport and maintenance of the nuclear pore complex (NPC) permeability barrier and is involved in gene tethering at the nuclear periphery; relocalizes to the cytosol in response to hypoxia; both NUP1 and NUP60 are homologous to human NUP153	III	3.32987	3.09061	2.94304	1.68138	-1.05356	-2.30103						66.9516	2.96962
YLR045C	STU2	Microtubule-associated protein (MAP) of the XMAP215/Dis1 family; regulates microtubule dynamics during spindle orientation and metaphase chromosome alignment; interacts with spindle pole body component Spc72p	III	2.51946	1.53431	1.01235	0.963145	0.673336	-3.71898						31.8758	1.41384
YCL017C	NFS1	Cysteine desulfurase; involved in iron-sulfur cluster (Fe/S) biogenesis and in thio-modification of mitochondrial and cytoplasmic tRNAs; essential protein located predominantly in mitochondria	III	3.52779	2.52363	0.950806						III	IV		94.2044	4.17841
YJL080C	SCP160	Essential RNA-binding G protein effector of mating response pathway; ligand-activated RNA-binding protein that delivers RNAs involved in polarization and perpetualizing mating signal to shmoo tip during pheromone signaling; Scp160p-mediated RNA trafficking essential for chemotropism and successful mating; mainly associated with nuclear envelope and ER, interacts in mRNA-dependent manner with tran…	III	3.68113	2.74356	1.76741	1.1179	-0.639446	-1.42894						275.157	12.2045
YAL034W-A	MTW1	Essential component of the MIND kinetochore complex; joins kinetochore subunits contacting DNA to those contacting microtubules; critical to kinetochore assembly; complex consists of Mtw1p Including Nnf1p-Nsl1p-Dsn1p (MIND)	III	3.04324	2.23672	0.755766								II	10.6544	0.472574
YLL004W	ORC3	Subunit of the origin recognition complex (ORC); ORC directs DNA replication by binding to replication origins and is also involved in transcriptional silencing	III	2.42094	1.91996	0.488098	-0.145262	-0.379063	-3.88599	-3.88599				IV	20.5842	0.913008
YDR301W	CFT1	RNA-binding subunit of the mRNA cleavage and polyadenylation factor; involved in poly(A) site recognition and required for both pre-mRNA cleavage and polyadenylation, 51% sequence similarity with mammalian AAUAA-binding subunit of CPSF	III	2.47707	1.72402	0.996204	-0.511902	-1.00468	-2.88599					II	30.4332	1.34986
YOR285W	RDL1	Thiosulfate sulfurtransferase; contains a rhodanese-like domain; localized to the mitochondrial outer membrane; protein abundance increases in response to DNA replication stress; similar to the human TSTD gene	III	2.65556	2.17549	1.09004	0.425735	-0.885995	-2.30103	-2.30103	-2.30103			IV	225.589	10.0059
YBR087W	RFC5	Subunit of heteropentameric Replication factor C (RF-C); RF-C is a DNA binding protein and ATPase that acts as a clamp loader of the proliferating cell nuclear antigen (PCNA) processivity factor for DNA polymerases delta and epsilon	III	3.66783	3.59603	2.97842	1.32541	-2.71898							62.0688	2.75304
YMR016C	SOK2	Nuclear protein that negatively regulates pseudohyphal differentiation; plays a regulatory role in the cyclic AMP (cAMP)-dependent protein kinase (PKA) signal transduction pathway; relocalizes to the cytosol in response to hypoxia; SOK2 has a paralog, PHD1, that arose from the whole genome duplication	III	3.08095	1.84761	0.893936	-0.584536	-2.13402	-2.13402	-2.13402	-2.71898				25.2802	1.1213
YGL041W-A		Putative protein of unknown function; conserved in fungi; identified by expression profiling and mass spectrometry	III	2.88538	1.95126	1.57909	0.424416	-1.75896	-2.71898			IV		III	59.0502	2.61915
YML012W	ERV25	Member of the p24 family involved in ER to Golgi transport; role in misfolded protein quality control; forms a heterotrimeric complex with Erp1, Erp2p, and Emp24,	III	2.70232	1.76284	-0.106064	-0.22908	-1.16055	-2.18757					III	282.496	12.53
YBR067C	TIP1	Major cell wall mannoprotein with possible lipase activity; transcription is induced by heat- and cold-shock; member of the Srp1p/Tip1p family of serine-alanine-rich proteins	III	3.85838	2.78637	2.07222	1.23087	-0.055403	-2.71898	-2.71898	-3.71898		IV	II	291.008	12.9076
YBR283C	SSH1	Subunit of the Ssh1 translocon complex; Sec61p homolog involved in co-translational pathway of protein translocation; not essential	III	2.05129	1.97887	1.66581	1.4862	1.44656	-3.88599	-3.88599	-3.88599			I	297.749	13.2065
YDR027C	VPS54	Component of the GARP (Golgi-associated retrograde protein) complex; GARP is required for the recycling of proteins from endosomes to the late Golgi, and for mitosis after DNA damage induced checkpoint arrest; potentially phosphorylated by Cdc28p; members of the GARP complex are Vps51p-Vps52p-Vps53p-Vps54p	III	3.57523	1.99487	1.27186	-1.05356	-1.56407	-3.88599	-3.88599					23.1953	1.02882
YPL004C	LSP1	Eisosome core component; eisosomes are large immobile patch structures at the cell cortex associated with endocytosis; phosphorylated on Thr233 upon Pkc1p hyperactivation in a Slt2p MAPK-dependent fashion; null mutants show activation of Pkc1p/Ypk1p stress resistance pathways; member of the BAR domain family	III	2.41421	1.94862	0.613128	-0.658224	-2.18757	-2.71898	-2.71898				II	161.717	7.17288
YDL052C	SLC1	1-acyl-sn-glycerol-3-phosphate acyltransferase; catalyzes the acylation of lysophosphatidic acid to form phosphatidic acid, a key intermediate in lipid metabolism; enzymatic activity detected in lipid particles and microsomes	III	1.32612	1.28666	1.28666	0.924875	0.924875	-3.71898			IV			98.5554	4.37139
YHL030W	ECM29	Scaffold protein; assists in association of the proteasome core particle with the regulatory particle; inhibits proteasomal ATPase activity; degraded by the mature proteasome after assembly; contains HEAT-like repeats; protein increases in abundance and relocalizes from nucleus to cytoplasm upon DNA replication stress	III	4.05027	2.92919	2.06937	1.83324	-2.24319	-2.88599	-2.88599	-2.88599		IV		45.5035	2.01829
YKL195W	MIA40	Import and assembly protein in mitochondrial intermembrane space; component of MIA pathway which mediates import and oxidative folding of substrates including small proteins containing twin cysteine motifs; acts in concert with Erv1p, which oxidizes the cysteine residues of Mia40p to comprise a disulfide relay system that catalyzes import; also mediates folding of Atp23p via a chaperone-like acti…	III	2.84069	2.17323	1.73792	-0.842394	-1.05356	-2.24319	-2.88599		II			76.7254	3.40313
YDR200C	VPS64	Protein required for cytoplasm to vacuole targeting of proteins; forms a complex with Far3p and Far7p to Far11p involved in recovery from pheromone-induced cell cycle arrest; mutant has increased aneuploidy tolerance; VPS64 has a paralog, FAR10, that arose from the whole genome duplication	III	1.24104	1.19393	0.673336	0.673336	0.673336	-3.71898						16.7088	0.741113
YDL174C	DLD1	D-lactate dehydrogenase; oxidizes D-lactate to pyruvate, transcription is heme-dependent, repressed by glucose, and derepressed in ethanol or lactate; located in the mitochondrial inner membrane	III	2.83877	2.28247	1.83324	-0.426563	-1.56407	-2.88599					III	33.1209	1.46907
YPL125W	KAP120	Karyopherin responsible for the nuclear import of Rpf1p; Rpf1p is a ribosome maturation factor	III	4.1752	3.78151	2.72684	-0.07864	-1.30103	-3.88599	-3.88599			IV		41.7911	1.85363
YMR212C	EFR3	Protein required for Stt4-containing PI kinase complex localization; required for Stt4-containing phosphoinositide (PI) kinase patch assembly at the plasma membrane; recruited to the plasma membrane via a conserved basic patch near its N-terminus; exhibits synthetic lethal genetic interactions with PHO85; has sequence similarity to the Drosophila rolling blackout (RBO) gene	III	2.51108	2.2129	1.68511	1.39672	-0.147222	-2.80007						78.7197	3.49159
YOR056C	NOB1	Protein involved in proteasomal and 40S ribosomal subunit biogenesis; required for cleavage of the 20S pre-rRNA to generate the mature 18S rRNA; cleavage is activated by Fun12p, a GTPase and translation initiation factor; relocalizes from nucleus to nucleolus upon DNA replication stress	III	4.21908	3.22524	2.27718	1.72349	-1.05356	-3.88599	-3.88599	-3.88599		IV		100.449	4.45539
YML063W	RPS1B	Ribosomal protein 10 (rp10) of the small (40S) subunit; homologous to mammalian ribosomal protein S3A, no bacterial homolog; RPS1B has a paralog, RPS1A, that arose from the whole genome duplication	III	3.21309	1.84094	0.668037	-0.257432	-0.842394	-3.88599	-3.88599		IV		IV	3243.14	143.848
YML014W	TRM9	tRNA methyltransferase; catalyzes modification of wobble bases in tRNA anticodons to 2, 5-methoxycarbonylmethyluridine and 5-methoxycarbonylmethyl-2-thiouridine; may act as part of a complex with Trm112p; deletion mutation increases translational infidelity, including amino acid misincorporation and -1 frameshifting, and also confers resistance to zymocin; null mutant displays activation of stres…	III	3.36271	2.81609	1.63586	0.044313	-2.24319	-3.71898					IV	51.1998	2.27095
YBR142W	MAK5	Essential nucleolar protein; putative DEAD-box RNA helicase required for maintenance of M1 dsRNA virus; involved in biogenesis of large (60S) ribosomal subunits	III	3.35805	2.2447	1.75681	0.434624	-1.49493	-2.18757	-3.71898				III	106.831	4.73844
YCR077C	PAT1	Deadenylation-dependent mRNA-decapping factor; also required for faithful chromosome transmission, maintenance of rDNA locus stability, and protection of mRNA 3'-UTRs from trimming; associated with topoisomerase II; binds to mRNAs under glucose starvation, most often in the 3' UTR; functionally linked to Pab1p; forms cytoplasmic foci upon DNA replication stress; phosphorylation by PKA inhibits P …	III	2.56619	1.73126	0.605276	0.044313	-1.52908	-3.88599					IV	97.4808	4.32373
YER064C	VHR2	Non-essential nuclear protein; null mutation has global effects on transcription; VHR2 has a paralog, VHR1, that arose from the whole genome duplication; relative distribution to the nucleus increases upon DNA replication stress	III	2.90789	2.23851	0.906769	0.486835	0.077064							62.8527	2.78781
YJL074C	SMC3	Subunit of the multiprotein cohesin complex; required for sister chromatid cohesion in mitotic cells; also required, with Rec8p, for cohesion and recombination during meiosis; phylogenetically conserved SMC chromosomal ATPase family member	III	2.81148	1.69733	0.434624	-0.529081	-2.24319	-2.88599						34.2915	1.52099
YDR235W	PRP42	U1 snRNP protein involved in splicing; required for U1 snRNP biogenesis; contains multiple tetriatricopeptide repeats	III	3.07527	1.79234	1.17892	0.042595	-0.957405							29.5679	1.31148
YMR189W	GCV2	P subunit of the mitochondrial glycine decarboxylase complex; glycine decarboxylase is required for the catabolism of glycine to 5,10-methylene-THF; expression is regulated by levels of 5,10-methylene-THF in the cytoplasm	III	4.07801	3.14096	1.29717	0.734328	-0.25955					IV		61.7782	2.74015
YOR265W	RBL2	Protein involved in microtubule morphogenesis; required for protection from excess free beta-tubulin; proposed to be involved the folding of beta-tubulin; similar to mouse beta-tubulin cofactor A; protein abundance increases in response to DNA replication stress	III	1.31172	0.847116	0.478263	0.406457	-0.639446	-3.88599	-3.88599					104.682	4.64316
YPR129W	SCD6	Repressor of translation initiation; binds eIF4G through its RGG domain and inhibits recruitment of the preinitiation complex; also contains an Lsm domain; may have a role in RNA processing; overproduction suppresses null mutation in clathrin heavy chain gene CHC1; forms cytoplasmic foci upon DNA replication stress	III	4.17561	3.23709	2.32444	1.02002	-0.564067	-3.88599				IV		106.981	4.74509
YDL007W	RPT2	ATPase of the 19S regulatory particle of the 26S proteasome; one of six ATPases of the regulatory particle; involved in the degradation of ubiquitinated substrates; required for normal peptide hydrolysis by the core 20S particle; N-myristoylation of Rpt2p at Gly2 is involved in regulating the proper intracellular distribution of proteasome activity by controlling the nuclear localization of the 2…	III	4.92038	3.84317	2.57478	1.88928	-2.18757	-3.71898	-3.71898			IV		129.831	5.7586
YPR033C	HTS1	Cytoplasmic and mitochondrial histidine tRNA synthetase; efficient mitochondrial localization requires both a presequence and an amino-terminal sequence; mutations in human ortholog HARS2 are associated with Perrault syndrome	III	4.31936	2.46499	1.63914	1.07138	0.963145	-3.88599	-3.88599			IV	IV	305.416	13.5466
YGL163C	RAD54	DNA-dependent ATPase that stimulates strand exchange; modifies the topology of double-stranded DNA; involved in the recombinational repair of double-strand breaks in DNA during vegetative growth and meiosis; member of the SWI/SNF family of DNA translocases; forms nuclear foci upon DNA replication stress	III	3.40046	2.11708	-0.478145	-0.779369	-0.957405	-2.80007						14.1753	0.628741
YIR030W-A		Dubious open reading frame; unlikely to encode a functional protein, based on available experimental and comparative sequence data; overlaps ORF DAL7/YIR031C	III	4.33479	1.7047	1.42953	0.546665	-0.134019	-2.71898			IV	III		0.802573	0.0355978
YOL023W	IFM1	Mitochondrial translation initiation factor 2	III	2.22396	1.85474	1.44411	0.668037	-0.257432	-2.30103	-2.30103		III			12.719	0.564146
YNL006W	LST8	Protein required for the transport of Gap1p; required for the transport of amino acid permease Gap1p from the Golgi to the cell surface; component of the TOR signaling pathway; associates with both Tor1p and Tor2p; contains a WD-repeat	III	1.73739	1.19393	0.696785	0.03092	-1.27182	-3.71898	-3.71898		III			30.5698	1.35591
YHR098C	SFB3	Component of the Sec23p-Sfb3p heterodimer of the COPII vesicle coat; COPII coat is required for cargo selection during vesicle formation in ER to Golgi transport; homologous to Sec24p and Sfb2p	III	3.07016	2.89597	2.32577	2.08273	1.07706	-2.88599	-3.88599					118.233	5.24417
YDL130W	RPP1B	Ribosomal protein P1 beta; component of the ribosomal stalk, which is involved in interaction of translational elongation factors with ribosome; free (non-ribosomal) P1 stimulates the phosphorylation of the eIF2 alpha subunit (Sui2p) by Gcn2p; accumulation is regulated by phosphorylation and interaction with the P2 stalk component	III	3.41887	2.31484	1.09565	0.168303	-0.842394	-2.88599	-2.88599	-2.88599			IV	1091.28	48.4035
YNL001W	DOM34	Protein that facilitates ribosomal subunit dissociation; Dom34-Hbs1 complex and Rli1p have roles in dissociating inactive ribosomes to facilitate translation restart, particularly ribosomes stalled in 3' UTRs; required for RNA cleavage in no-go decay, but reports conflict on endonuclease activity; Pelota ortholog; protein abundance increases in response to DNA replication stress; DOM34 has a para…	III	4.46886	3.57653	1.80267	0.252628	-0.22908	-2.88599						64.925	2.87973
YIL078W	THS1	Threonyl-tRNA synthetase; essential cytoplasmic protein; human homolog TARS can complement yeast null mutant	III	2.97278	2.38071	0.956989	-1.52908	-1.52908	-3.71898				IV	IV	756.224	33.5421
YOR335C	ALA1	Cytoplasmic and mitochondrial alanyl-tRNA synthetase; required for protein synthesis; point mutation (cdc64-1 allele) causes cell cycle arrest at G1; lethality of null mutation is functionally complemented by human homolog AARS; mutations in human homolog AARS are associated with autoimmune disease polymyositis/dermatomyositis	III	4.86513	4.09553	2.91108	1.77339	-1.56407	-2.30103	-3.88599			IV	II	486.189	21.5647
YDL008W	APC11	Catalytic core subunit, Anaphase-Promoting Complex/Cyclosome (APC/C); which is a ubiquitin-protein ligase required for degradation of anaphase inhibitors, including mitotic cyclins, during the metaphase/anaphase transition; contains a RING-H2 domain that is required for activity	III	2.82387	2.0844	1.05503	0.032652	-0.885995							50.7284	2.25004
YBR218C	PYC2	Pyruvate carboxylase isoform; cytoplasmic enzyme that converts pyruvate to oxaloacetate; differentially regulated than isoform Pyc1p; mutations in the human homolog are associated with lactic acidosis; PYC2 has a paralog, PYC1, that arose from the whole genome duplication	III	3.47735	2.06078	1.14603	0.61197	-2.88599	-2.88599					III	119.032	5.27963
YDL046W	NPC2	Sterol transport protein and functional homolog of human NPC2/He1; human NPC2 is a cholesterol-binding protein whose deficiency causes Niemann-Pick type C2 disease involving retention of cholesterol in lysosomes; yeast NPC2 can complement mutations in human NPC2	III	3.23578	2.31136	0.168303	-0.426563	-0.426563						I	139.135	6.17129
YFR006W		Putative X-Pro aminopeptidase; green fluorescent protein (GFP)-fusion protein localizes to the cytoplasm; YFR006W is not an essential gene	III	3.25133	1.97628	1.08921	0.776889	0.450944							79.2191	3.51374
YDR046C	BAP3	Amino acid permease; involved in uptake of cysteine, leucine, isoleucine and valine; BAP3 has a paralog, BAP2, that arose from the whole genome duplication	III	3.08722	2.46129	1.27259	-0.696529	-2.30103	-3.88599	-3.88599					62.7336	2.78253
YFR051C	RET2	Delta subunit of the coatomer complex (COPI); COPI coats Golgi-derived transport vesicles; involved in retrograde transport between Golgi and ER	III	3.64383	2.54902	1.0779	0.340379	0.261169	-0.043011	-3.88599	-3.88599				139.177	6.17316
YGL054C	ERV14	COPII-coated vesicle protein; involved in vesicle formation and incorporation of specific secretory cargo; required for the delivery of bud-site selection protein Axl2p to cell surface; related to Drosophila cornichon; ERV14 has a paralog, ERV15, that arose from the whole genome duplication	III	3.73356	2.83038	1.44411	0.920425	-0.494925	-1.80007	-2.71898	-2.71898			II	156.884	6.95856
YLR438C-A	LSM3	Lsm (Like Sm) protein; part of heteroheptameric complexes (Lsm2p-7p and either Lsm1p or 8p): cytoplasmic Lsm1p complex involved in mRNA decay; nuclear Lsm8p complex part of U6 snRNP and possibly involved in processing tRNA, snoRNA, and rRNA; protein increases in abundance and relocalizes from nucleus to cytoplasmic foci upon DNA replication stress	III	3.06715	2.48351	1.827	0.538442	-0.303215	-2.18757	-2.18757	-3.88599				52.1	2.31088
YDL137W	ARF2	ADP-ribosylation factor; GTPase of the Ras superfamily involved in regulation of coated formation vesicles in intracellular trafficking within the Golgi; ARF2 has a paralog, ARF1, that arose from the whole genome duplication	III	4.30655	3.26565	2.6055	1.59958	1.27113	-3.88599	-3.88599	-3.88599			III	299.432	13.2812
YKL013C	ARC19	Subunit of the ARP2/3 complex; ARP2/3 is required for the motility and integrity of cortical actin patches	III	3.31069	2.90996	1.97628	-0.018542	-1.71898							133.871	5.93782
YDR127W	ARO1	Pentafunctional arom protein; catalyzes steps 2 through 6 in the biosynthesis of chorismate, which is a precursor to aromatic amino acids	III	3.10404	2.51528	1.79182	0.321334	-0.134019	-1.39705				IV		118.962	5.27653
YGR078C	PAC10	Part of the heteromeric co-chaperone GimC/prefoldin complex; complex promotes efficient protein folding	III	2.52394	1.48747	1.10125	0.398736	-0.71607	-1.886	-2.88599	-2.88599				116.197	5.15389
YKR003W	OSH6	Member of an oxysterol-binding protein family; overlapping, redundant functions in sterol metabolism and which collectively perform a function essential for viability; GFP-fusion protein localizes to the cell periphery; overexpression extends lifespan by promoting vacuolar fusion; OSH6 has a paralog, OSH7, that arose from the whole genome duplication	III	3.11907	2.21768	0.819233	0.241043	-3.88599							57.5171	2.55115
YPR048W	TAH18	Conserved NAPDH-dependent diflavin reductase; component of an early step in the cytosolic Fe-S protein assembly (CIA) machinery; transfers electrons from NADPH to the Fe-S cluster of Dre2p; plays a pro-death role under oxidative stress; Tah18p-dependent nitric oxide synthesis confers high-temperature stress tolerance; possible target for development of antifungal drugs	III	2.2544	1.8366	0.210317	-0.080511	-0.428945	-2.88599						38.8237	1.72201
YDR054C	CDC34	Ubiquitin-conjugating enzyme (E2); catalytic subunit of SCF ubiquitin-protein ligase complex (together with Skp1p, Rbx1p, Cdc53p, and an F-box protein) that regulates cell cycle progression by targeting key substrates for degradation; protein abundance increases in response to DNA replication stress	III	3.33379	2.64163	1.91585	1.67764	-1.27182	-2.24319				IV		91.8124	4.07231
YEL026W	SNU13	RNA binding protein; part of U3 snoRNP involved in rRNA processing, part of U4/U6-U5 tri-snRNP involved in mRNA splicing, similar to human 15.5K protein	III	3.38827	1.91949	0.46964	-0.842394	-1.30103	-1.30103	-3.88599				IV	885.08	39.2574
YHR149C	SKG6	Integral membrane protein; localizes primarily to growing sites such as the bud tip or the cell periphery; potential Cdc28p substrate; Skg6p interacts with Zds1p and Zds2p; SKG6 has a paralog, TOS2, that arose from the whole genome duplication	III	3.52956	2.46964	1.42508	-1.49493							II	37.7843	1.67591
YJL123C	MTC1	Protein of unknown function that may interact with ribosomes; green fluorescent protein (GFP)-fusion protein localizes to the cytoplasm and to COPI-coated vesicles (early Golgi); mtc1 is synthetically lethal with cdc13-1	III	3.15701	2.23455	0.958812	0.901315	-0.394724	-3.71898				III		55.4235	2.45829
YOR194C	TOA1	TFIIA large subunit; involved in transcriptional activation, acts as antirepressor or as coactivator; required, along with Toa2p, for ribosomal protein gene transcription in vivo; homologous to largest and second largest subunits of human and Drosophila TFIIA	III	2.20811	1.47028	0.77092	-0.461558	-1.46156	-2.24319	-3.71898	-3.71898		IV		16.1323	0.715542
YGR094W	VAS1	Mitochondrial and cytoplasmic valyl-tRNA synthetase; human homolog VARS2 implicated in mitochondrial diseases, can partially complement yeast null mutant	III	2.59482	1.69418	0.596211	-0.677249	-1.52908	-2.80007	-3.88599	-3.88599				627.093	27.8145
YLR048W	RPS0B	Protein component of the small (40S) ribosomal subunit; RPS0B has a paralog, RPS0A, that arose from the whole genome duplication; required for maturation of 18S rRNA along with Rps0Ap; deletion of either RPS0 gene reduces growth rate, deletion of both genes is lethal; homologous to human ribosomal protein SA and bacterial S2	III	2.66343	1.46595	1.23163	0.847116	-1.56407							1780.07	78.9546
YNL185C	MRPL19	Mitochondrial ribosomal protein of the large subunit	III	3.13809	2.46346	1.77844	0.416791	-0.132077	-0.658224	-2.80007	-3.71898	II	IV		42.7494	1.89614
YDR233C	RTN1	Reticulon protein; stabilizes membrane curvature; involved in nuclear pore assembly and maintenance of tubular ER morphology; mutant overexpressing RTN1 shows increase in tubular ER; interacts with exocyst subunit Sec6p, Yip3p, and Sbh1p; more abundant than Rtn2p; member of the RTNLA subfamily; mutants have reduced phosphatidylserine transfer between the ER and mitochondria; RTN1 has a paralog, R…	III	3.23469	2.86013	1.76336	1.2569	-0.639446	-1.24319	-2.24319	-3.88599		IV	III	421.916	18.7139
YLL018C	DPS1	Aspartyl-tRNA synthetase, primarily cytoplasmic; homodimeric enzyme that catalyzes the specific aspartylation of tRNA(Asp); class II aminoacyl tRNA synthetase; binding to its own mRNA may confer autoregulation; shares five highly conserved amino acids with human that when mutated cause leukoencephalopathy characterized by hypomyelination with brain stem and spinal cord involvement and leg spastic…	III	2.22282	1.53783	1.20436	0.726041	-2.80007							385.525	17.0998
YJL050W	MTR4	ATP-dependent 3'-5' RNA helicase of the DExD/H family; involved in nuclear RNA processing and degradation both as a component of TRAMP complex and in TRAMP-independent processes; TRAMP unwinds RNA duplexes, with Mtr4p unwinding activity stimulated by Pap2p/Air2p but not dependent on ongoing polyadenylation; contains an arch domain, with two coiled-coil arms/stalks and a globular fist/KOW domain, …	III	4.35904	3.0043	1.71568	0.696785	-0.067902	-2.80007	-2.80007	-3.88599		III		139.438	6.18472
YKL108W	SLD2	Single-stranded DNA origin-binding and annealing protein; required for initiation of DNA replication; phosphorylated in S phase by cyclin-dependent kinases (Cdks), promoting origin binding, DNA replication and Dpb11p complex formation; component of the preloading complex; binds the Mcm2-7p complex to prevent inappropriate Mcm2-7p interaction with the GINS complex in G1; required for S phase check…	III	4.47474	3.20383	2.64928	1.64355	-3.88599							15.7639	0.699201
YKL063C		Putative protein of unknown function; green fluorescent protein (GFP)-fusion protein localizes to the Golgi	III	3.4937	2.63393	1.675	0.452238	-1.80007	-3.88599						63.1877	2.80267
YMR022W	UBC7	Ubiquitin conjugating enzyme; involved in the ER-associated protein degradation pathway; requires Cue1p for recruitment to the ER membrane; proposed to be involved in chromatin assembly	III	1.32612	1.01235	0.340379	0.166727	0.065666	-3.88599						96.4476	4.2779
YEL029C	BUD16	Putative pyridoxal kinase; a key enzyme involved in pyridoxal 5'-phosphate synthesis, the active form of vitamin B6; required for genome integrity; involved in bud-site selection; similarity to yeast BUD17 and human pyridoxal kinase (PDXK)	III	3.38547	2.11473	1.54666	0.496612	-0.21511	-3.88599	-3.88599	-3.88599				40.9094	1.81452
YLR330W	CHS5	Component of the exomer complex; exomer also contains Csh6p, Bch1p, Bch2p, and Bud7p and is involved in export of selected proteins, such as chitin synthase Chs3p, from the Golgi to the plasma membrane; Chs5p is the only protein with a BRCT domain that is not localized to the nucleus	III	3.19451	2.58198	1.64355	-0.243186	-2.30103							77.6442	3.44388
YBR155W	CNS1	TPR-containing co-chaperone; binds both Hsp82p (Hsp90) and Ssa1p (Hsp70); stimulates ATPase activity of Ssa1p; ts mutants reduce Hsp82p function, overexpression suppresses phenotypes of HSP82 ts allele and cpr7 deletion; human homolog TTC4 complements yeast cns1 mutant	III	3.35385	2.10362	1.77339	1.51225	1.40126	-2.24319	-3.88599	-3.88599				74.2197	3.29199
YKL143W	LTV1	Component of the GSE complex; GSE is required for proper sorting of amino acid permease Gap1p; required for ribosomal small subunit export from nucleus; required for growth at low temperature	III	2.4343	1.48319	0.619785	0.340379	-2.88599	-2.88599	-2.88599					86.434	3.83375
YLR218C	COA4	Twin Cx(9)C protein involved in cytochrome c oxidase organization; organization includes assembly or stability; localizes to the mitochondrial intermembrane space via the Mia40p-Erv1p system; interacts genetically with CYC1 and with cytochrome c oxidase assembly factors	III	2.4273	2.14252	1.73686	1.67334	-0.018542	-3.71898			I	IV	II	8.3326	0.36959
YNL149C	PGA2	Essential protein required for maturation of Gas1p and Pho8p; involved in protein trafficking; GFP-fusion protein localizes to the ER and YFP-fusion protein to the nuclear envelope-ER network; null mutants have a cell separation defect	III	2.39806	1.79579	0.628703	-0.71607	-1.56407	-1.886	-2.88599	-3.88599				206.213	9.14652
YGL091C	NBP35	Essential cytoplasmic iron-sulfur cluster binding protein; forms a complex with Cfd1p that is involved in iron-sulfur protein assembly in the cytosol; similar to P-loop NTPases	III	2.52093	1.9539	1.59504	1.4862	-0.934334	-1.71898						31.9749	1.41824
YHR073W	OSH3	Member of an oxysterol-binding protein family; this family has seven members in S. cerevisiae; family members have overlapping, redundant functions in sterol metabolism and collectively perform a function essential for viability; contains FFAT motif; interacts with ER anchor Scs2p at patches at the plasma membrane; regulated by sterol binding	III	2.70918	1.70524	1.34649	0.322751	-0.885995					IV	IV	54.495	2.41711
YCR072C	RSA4	WD-repeat protein involved in ribosome biogenesis; may interact with ribosomes; required for maturation and efficient intra-nuclear transport or pre-60S ribosomal subunits, localizes to the nucleolus	III	2.65366	2.16751	1.73739	0.210317	-1.52908	-3.71898	-3.71898					95.0347	4.21523
YDR154C		Dubious open reading frame; unlikely to encode a functional protein, based on available experimental and comparative sequence data; null mutant exhibits synthetic phenotype with alpha-synuclein	III	2.91837	2.04925	1.1297	-0.053564	-2.30103	-3.88599	-3.88599				IV	634.944	28.1627
YOR209C	NPT1	Nicotinate phosphoribosyltransferase; acts in the salvage pathway of NAD+ biosynthesis; required for silencing at rDNA and telomeres and has a role in silencing at mating-type loci; localized to the nucleus	III	3.79748	3.0263	2.2151	1.4911	-1.24319	-2.30103				IV	IV	208.706	9.25708
YNR016C	ACC1	Acetyl-CoA carboxylase, biotin containing enzyme; catalyzes carboxylation of cytosolic acetyl-CoA to form malonyl-CoA and regulates histone acetylation by regulating the availablity of acetyl-CoA; required for de novo biosynthesis of long-chain fatty acids; ACC1 has a paralog, HFA1, that arose from the whole genome duplication	III	2.84594	1.77844	0.926739	-0.158568	-0.71607	-3.88599						347.643	15.4196
YIL001W		Putative protein of unknown function; contains a BTB/POZ domain which generally function in protein interactions; deletion slightly improved competitive fitness in rich media; GFP-tagged protein is localized to the cytoplasm	III	2.60214	1.69363	1.08921	-0.428945	-1.13402							14.3028	0.634397
YER055C	HIS1	ATP phosphoribosyltransferase; a hexameric enzyme, catalyzes the first step in histidine biosynthesis; mutations cause histidine auxotrophy and sensitivity to Cu, Co, and Ni salts; transcription is regulated by general amino acid control	III	3.74254	3.14948	1.33564	0.241043	-1.84239	-2.24319	-3.71898	-3.71898				352.432	15.632
YDL157C		Putative protein of unknown function; the authentic, non-tagged protein is detected in highly purified mitochondria in high-throughput studies	III	3.39174	2.58487	1.66748	-0.185555	-0.564067	-1.56407	-3.88599	-3.88599	IV		IV	137.018	6.07739
YDL189W	RBS1	Protein involved in assembly of the RNA polymerase III (Pol III) complex; high copy suppressor of Pol III assembly mutation and psk1 psk2 mutations that confer temperature-sensitivity for galactose utilization; physically interacts with Pol III; proposed to bind single-stranded nucleic acids via its R3H domain	III	3.63682	2.3925	2.05129	1.07138	0.852778	-3.88599				IV		55.2713	2.45154
YPL129W	TAF14	Subunit of TFIID, TFIIF, INO80, SWI/SNF, and NuA3 complexes; involved in RNA polymerase II transcription initiation and in chromatin modification; contains a YEATS domain	III	3.35002	1.38505	0.771957	0.114005							II	92.3525	4.09627
YKL152C	GPM1	Tetrameric phosphoglycerate mutase; mediates the conversion of 3-phosphoglycerate to 2-phosphoglycerate during glycolysis and the reverse reaction during gluconeogenesis	III	3.51888	2.61978	1.66636	-0.86403	-1.56407	-1.886	-1.886			II	II	9298.35	412.425
YDR444W		Putative hydrolase acting on ester bonds	III	2.89716	1.60921	1.2059	0.572246	-0.658224	-2.30103						22.0319	0.977219
YLL026W	HSP104	Disaggregase; heat shock protein that cooperates with Ydj1p (Hsp40) and Ssa1p (Hsp70) to refold and reactivate previously denatured, aggregated proteins; responsive to stresses including: heat, ethanol, and sodium arsenite; involved in [PSI+] propagation; protein becomes more abundant and forms cytoplasmic foci in response to DNA replication stress; potentiated Hsp104p variants decrease TDP-43 pr…	III	3.13688	2.64872	0.042595	-0.98085	-1.18757	-3.88599	-3.88599	-3.88599				99.5626	4.41606
YKR099W	BAS1	Myb-related transcription factor; involved in regulating basal and induced expression of genes of the purine and histidine biosynthesis pathways; also involved in regulation of meiotic recombination at specific genes	III	2.42028	1.68938	1.44281	0.210317	-1.56407	-3.88599					III	46.8488	2.07796
YDL131W	LYS21	Homocitrate synthase isozyme; catalyzes the condensation of acetyl-CoA and alpha-ketoglutarate to form homocitrate, which is the first step in the lysine biosynthesis pathway; LYS21 has a paralog, LYS20, that arose from the whole genome duplication	III	2.5402	0.613128	0.303471	-0.286352	-1.52908	-1.52908	-2.88599	-3.88599				79.669	3.53369
YGR285C	ZUO1	Ribosome-associated chaperone; zuotin functions in ribosome biogenesis and, in partnership with Ssz1p and SSb1/2, as a chaperone for nascent polypeptide chains; contains a DnaJ domain and functions as a J-protein partner for Ssb1p and Ssb2p	III	3.76009	3.19713	1.75629	1.1398	-1.84239	-3.71898			III	IV	III	790.905	35.0803
YGR207C	CIR1	Mitochondrial protein that interacts with frataxin (Yfh1p); putative ortholog of mammalian electron transfer flavoprotein complex subunit ETF-beta; may have a role in oxidative stress response	III	3.59819	2.45758	1.06078	-1.27182	-2.30103	-2.88599			III			80.3056	3.56193
YKL196C	YKT6	Vesicle membrane protein (v-SNARE) with acyltransferase activity; involved in trafficking to and within the Golgi, endocytic trafficking to the vacuole, and vacuolar fusion; membrane localization due to prenylation at the carboxy-terminus	III	3.72788	1.827	1.20513	-0.86403						III	III	211.295	9.3719
YKL006C-A	SFT1	Intra-Golgi v-SNARE; required for transport of proteins between an early and a later Golgi compartment	III	3.09045	2.25551	1.24834	0.581463	0.032652	-1.886	-2.88599		IV	IV		33.647	1.4924
YER086W	ILV1	Threonine deaminase, catalyzes first step in isoleucine biosynthesis; expression is under general amino acid control; ILV1 locus exhibits highly positioned nucleosomes whose organization is independent of known ILV1 regulation	III	2.05993	1.96314	1.52895									181.596	8.05462
YHR191C	CTF8	Subunit of a complex with Ctf18p; shares some subunits with Replication Factor C; required for sister chromatid cohesion	III	1.75577	1.75577	1.46032	1.25616	-1.56407							20.342	0.902263
YBR278W	DPB3	Third-largest subunit of DNA polymerase II (DNA polymerase epsilon); required to maintain fidelity of chromosomal replication and also for inheritance of telomeric silencing; stabilizes the interaction of Pol epsilon with primer-template DNA, positively affecting the processivity of the polymerase and exonuclease activities of Pol epsilon; mRNA abundance peaks at the G1/S boundary of the cell cyc…	III	2.89739	2.4746	1.32753	0.636429	-0.303215	-1.49493	-2.88599			III	II	23.8234	1.05668
YDR007W	TRP1	Phosphoribosylanthranilate isomerase; catalyzes the third step in tryptophan biosynthesis; in 2004, the sequence of TRP1 from strain S228C was updated by changing the previously annotated internal STOP (TAA) to serine (TCA)	III	3.7258	2.59819	1.30132	-1.27182	-2.24319	-3.71898	-3.71898	-3.71898		IV		55.7605	2.47324
YGL172W	NUP49	FG-nucleoporin component of central core of the nuclear pore complex; contributes directly to nucleocytoplasmic transport and maintenance of the nuclear pore complex (NPC) permeability barrier; found in stable complex with Nic96p and two other FG-nucleoproteins (Nsp1p and Nup57p)	III	2.82744	1.17736	1.17736	1.17736	-2.88599							35.4922	1.57424
YMR124W	EPO1	Protein involved in septin-ER tethering; interacts with ER membrane protein, Scs2p, and Shs1p, a septin ring component, at bud neck to create ER diffusion barrier; GFP-fusion protein localizes to the cell periphery, cytoplasm, bud, and bud neck; interacts with Crm1p in two-hybrid assay; YMR124W has a paralog, YLR031W, that arose from the whole genome duplication	III	2.7881	2.31172	1.79477	0.905824	0.852778	-3.88599						19.6895	0.873323
YLR212C	TUB4	Gamma-tubulin; involved in nucleating microtubules from both the cytoplasmic and nuclear faces of the spindle pole body; protein abundance increases in response to DNA replication stress	III	2.69047	1.67875	1.27259	-0.379063							III	28.9199	1.28273
YDR450W	RPS18A	Protein component of the small (40S) ribosomal subunit; homologous to mammalian ribosomal protein S18 and bacterial S13; RPS18A has a paralog, RPS18B, that arose from the whole genome duplication; protein increases in abundance and relocalizes from cytoplasm to nuclear foci upon DNA replication stress	III	2.23455	1.15761	0.389623	0.055881	-1.80007	-2.24319	-2.88599	-3.88599			III	1592.33	70.6272
YLR398C	SKI2	Ski complex component and putative RNA helicase; mediates 3'-5' RNA degradation by the cytoplasmic exosome; null mutants have superkiller phenotype of increased viral dsRNAs and are synthetic lethal with mutations in 5'-3' mRNA decay; mutations in the human ortholog, SKIV2L, causes Syndromic diarrhea/Trichohepatoenteric (SD/THE) syndrome	III	3.55106	2.06736	1.31243	0.261169	-2.80007	-2.80007	-2.80007					36.9331	1.63815
YJL145W	SFH5	Non-classical phosphatidylinositol transfer protein (PITP); exhibits PI- but not PC-transfer activity; localizes to the peripheral endoplasmic reticulum, cytosol and microsomes; similar to Sec14p; partially relocalizes to the plasma membrane upon DNA replication stress	III	2.91155	2.27928	2.1751	1.13436	0.369852	-2.88599	-3.88599	-3.88599			II	114.784	5.09121
YER087C-B	SBH1	Beta subunit of Sec61p ER translocation complex (Sec61p-Sss1p-Sbh1p); involved in protein translocation into the endoplasmic reticulum; interacts with the exocyst complex and also with Rtn1p; cotranslationally N-acetylated by NatA; SBH1 has a paralog, SBH2, that arose from the whole genome duplication	III	2.14332	1.05011	0.792847	0.157606	-2.30103	-2.30103	-2.30103	-3.88599	IV		IV	278.314	12.3445
YMR263W	SAP30	Component of Rpd3L histone deacetylase complex; involved in silencing at telomeres, rDNA, and silent mating-type loci; involved in telomere maintenance	III	2.753	1.675	1.14061	0.945517	-0.885995	-3.88599	-3.88599				III	27.5973	1.22407
YKL154W	SRP102	Signal recognition particle (SRP) receptor beta subunit; involved in SRP-dependent protein targeting; anchors the alpha subunit, Srp101p to the ER membrane	III	2.69918	1.97932	0.833739	-0.602608	-0.957405	-3.88599	-3.88599	-3.88599			IV	65.8155	2.91923
YGR202C	PCT1	Cholinephosphate cytidylyltransferase; a rate-determining enzyme of the CDP-choline pathway for phosphatidylcholine synthesis, inhibited by Sec14p, activated upon lipid-binding; contains an element within the regulatory domain involved in both silencing and activation of enzymatic activity	III	3.56544	2.73766	2.28421	0.689377	-0.134019	-3.71898			III			34.3734	1.52462
YKR094C	RPL40B	Ubiquitin-ribosomal 60S subunit protein L40B fusion protein; cleaved to yield ubiquitin and ribosomal protein L40B; ubiquitin may facilitate assembly of the ribosomal protein into ribosomes; homologous to mammalian ribosomal protein L40, no bacterial homolog; RPL40B has a paralog, RPL40A, that arose from the whole genome duplication	III	3.34396	2.56993	1.81634	0.78489	-1.21511	-2.13402	-2.13402	-2.13402			I	978.05	43.3811
YGL206C	CHC1	Clathrin heavy chain; subunit of the major coat protein involved in intracellular protein transport and endocytosis; the clathrin triskelion is a trimeric molecule composed of three heavy chains that radiate from a vertex and three light chains which bind noncovalently near the vertex of the triskelion; the light chain (CLC1) is thought to regulate function	III	2.19209	1.82312	1.14061	0.114005	-2.88599							229.543	10.1813
YCR088W	ABP1	Actin-binding protein of the cortical actin cytoskeleton; important for activation of the Arp2/3 complex that plays a key role actin in cytoskeleton organization; inhibits barbed-end actin filament elongation; phosphorylation within its Proline-Rich Regio, mediated by Cdc28p and Pho85p, protects Abp1p from proteolysis mediated by its own PEST sequences; mammalian homologue of HIP-55 (hematopoieti…	III	3.69096	2.80851	2.12534	1.07706	-3.88599	-3.88599	-3.88599	-3.88599		IV		166.523	7.38609
YDR394W	RPT3	ATPase of the 19S regulatory particle of the 26S proteasome; one of ATPases of the regulatory particle; involved in the degradation of ubiquitinated substrates; substrate of N-acetyltransferase B	III	1.79873	1.7704	1.33564	1.20436	-3.88599	-3.88599	-3.88599					137.472	6.09753
YGR074W	SMD1	Core Sm protein Sm D1; part of heteroheptameric complex (with Smb1p, Smd2p, Smd3p, Sme1p, Smx3p, and Smx2p) that is part of the spliceosomal U1, U2, U4, and U5 snRNPs; relocalizes to the cytosol in response to hypoxia; homolog of human Sm D1; protein abundance increases in response to DNA replication stress	III	3.34597	2.61978	1.66636	-0.106064	-2.88599	-3.88599					III	49.6933	2.20413
YMR317W		Putative protein of unknown function; has some similarity to sialidase from Trypanosoma; YMR317W is not an essential gene	III	2.78714	1.60921	0.828001	0.506323	-1.30103	-2.88599	-3.88599	-3.88599	II		IV	8.96784	0.397766
YKR028W	SAP190	Protein that forms a complex with the Sit4p protein phosphatase; required for Sit4p function; member of a family of similar proteins including Sap4p, Sap155p, and Sap185p; SAP190 has a paralog, SAP185, that arose from the whole genome duplication	III	2.30688	2.04259	1.33089	-0.821078	-2.30103	-3.88599						57.0675	2.53121
YOR205C	GEP3	Protein required for mitochondrial ribosome small subunit biogenesis; null mutant is defective in respiration and in maturation of 15S rRNA; protein is localized to the mitochondrial inner membrane; null mutant interacts synthetically with prohibitin (Phb1p)	III	2.44566	2.03092	0.853759	0.088373	-2.71898				II			25.1241	1.11437
YDL002C	NHP10	Non-essential INO80 chromatin remodeling complex subunit; preferentially binds DNA ends, protecting them from exonucleatic cleavage; deletion affects telomere maintenance via recombination; related to mammalian high mobility group proteins	III	2.52185	1.95126	1.18869	-1.02892	-1.24319	-3.88599	-3.88599	-3.88599			II	52.8699	2.34503
YHR197W	RIX1	Component of the Rix1 complex and possibly pre-replicative complexes; required for processing of ITS2 sequences from 35S pre-rRNA; component of the pre-60S ribosomal particle with the dynein-related AAA-type ATPase Mdn1p; required for pre-replicative complex (pre-RC) formation and maintenance during DNA replication licensing; relocalizes to the cytosol in response to hypoxia; essential gene	III	3.4483	2.71331	0.798726									86.3741	3.83109
YNL084C	END3	EH domain-containing protein involved in endocytosis; actin cytoskeletal organization and cell wall morphogenesis; forms a complex with Sla1p and Pan1p	III	3.32253	2.31172	0.735392	-0.511902	-1.56407	-3.88599					III	79.8849	3.54327
YER032W	FIR1	Protein involved in 3' mRNA processing; interacts with Ref2p; APCC(Cdh1) substrate; potential Cdc28p substrate	III	2.50476	1.87677	1.08357	0.925807	0.704155	-2.88599				III		18.3662	0.814626
YGL011C	SCL1	Alpha 1 subunit of the 20S proteasome; involved in the degradation of ubiquitinated substrates; 20S proteasome is the core complex of the 26S proteasome; essential for growth; detected in the mitochondria	III	3.8477	2.86531	1.48747	-0.426563	-1.56407	-1.886						206.055	9.13951
YLR259C	HSP60	Tetradecameric mitochondrial chaperonin; required for ATP-dependent folding of precursor polypeptides and complex assembly; prevents aggregation and mediates protein refolding after heat shock; role in mtDNA transmission; phosphorylated	III	2.90221	1.83038	0.813438	-0.394724	-1.56407	-2.30103	-2.30103	-3.88599	I		IV	566.234	25.1151
YGL048C	RPT6	ATPase of the 19S regulatory particle of the 26S proteasome; one of six ATPases of the regulatory particle; involved in the degradation of ubiquitinated substrates; bound by ubiquitin-protein ligases Ubr1p and Ufd4p; localized mainly to the nucleus throughout the cell cycle; protein abundance increases in response to DNA replication stress	III	3.37516	1.80318	1.09565	0.302036	-2.88599	-3.88599	-3.88599			IV	III	203.681	9.03422
YGR214W	RPS0A	Ribosomal 40S subunit protein S0A; required for maturation of 18S rRNA along with Rps0Bp; deletion of either RPS0 gene reduces growth rate, deletion of both genes is lethal; homologous to human ribosomal protein SA and bacterial S2; RPS0A has a paralog, RPS0B, that arose from the whole genome duplication;	III	2.62454	1.73486	0.24254	-0.529081	-1.02892	-2.88599	-3.88599	-3.88599			IV	1267.24	56.208
YBR084W	MIS1	Mitochondrial C1-tetrahydrofolate synthase; involved in interconversion between different oxidation states of tetrahydrofolate (THF); provides activities of formyl-THF synthetase, methenyl-THF cyclohydrolase, and methylene-THF dehydrogenase	III	2.87023	2.4016	2.16138	2.06852	0.726041	-3.88599	-3.88599	-3.88599			IV	219.991	9.75762
YPL173W	MRPL40	Mitochondrial ribosomal protein of the large subunit	III	1.9063	1.42442	0.956989	0.899418	0.790801	-2.88599			III			35.9624	1.5951
YJL092W	SRS2	DNA helicase and DNA-dependent ATPase; involved in DNA repair and checkpoint recovery, needed for proper timing of commitment to meiotic recombination and transition from Meiosis I to II; blocks trinucleotide repeat expansion; affects genome stability; disassembles Rad51p nucleoprotein filaments during meiotic recombination; functional homolog of human RTEL1	III	2.37482	1.71203	0.880988	0.705241	-0.185555	-1.30103	-3.88599			III	III	28.8102	1.27787
YOR298C-A	MBF1	Transcriptional coactivator; bridges the DNA-binding region of Gcn4p and TATA-binding protein Spt15p; suppressor of frameshift mutations; protein abundance increases in response to DNA replication stress	III	3.73975	2.75504	1.4881	0.538442	-1.30103	-3.88599						439.279	19.4841
YGL076C	RPL7A	Ribosomal 60S subunit protein L7A; required for processing of 27SA3 pre-rRNA to 27SB pre-rRNA during assembly of large ribosomal subunit; depletion leads to a turnover of pre-rRNA; contains a conserved C-terminal Nucleic acid Binding Domain (NDB2); binds to Domain II of 25S and 5.8S rRNAs; homologous to mammalian ribosomal protein L7 and bacterial L30; RPL7A has a paralog, RPL7B, that arose from …	III	4.53123	3.06407	1.64794	1.10125	-0.696529	-2.30103	-3.88599	-3.88599		IV	IV	344.841	15.2953
YJR140C	HIR3	Subunit of the HIR complex; a nucleosome assembly complex involved in regulation of histone gene transcription; involved in position-dependent gene silencing and nucleosome reassembly; ortholog of human CABIN1 protein	III	3.85741	3.18869	1.22139	0.332295	-1.16055	-1.16055	-3.88599		IV	III		26.5857	1.1792
YOR140W	SFL1	Transcriptional repressor and activator; involved in repression of flocculation-related genes, and activation of stress responsive genes; negatively regulated by cAMP-dependent protein kinase A subunit Tpk2p; premature stop codon (C1430T, Q477-stop) in SK1 background is linked to the aggressively invasive phenotype of SK1 relative to BY4741 (S288C)	III	2.4042	2.25904	1.82938	-0.602608	-0.758957							20.6908	0.917733
YOL116W	MSN1	Transcriptional activator; involved in regulation of invertase and glucoamylase expression, invasive growth and pseudohyphal differentiation, iron uptake, chromium accumulation, and response to osmotic stress; localizes to the nucleus; relative distribution to the nucleus increases upon DNA replication stress	III	3.09964	2.67792	2.05993	1.87955	-1.56407	-3.88599	-3.88599	-3.88599			III	23.8199	1.05652
YDL086W		Putative carboxymethylenebutenolidase; the authentic, non-tagged protein is detected in highly purified mitochondria in high-throughput studies; YDL086W is not an essential gene	III	2.80121	1.99275	1.18498	0.470919	-0.363571	-2.88599	-2.88599	-2.88599	IV	IV	IV	83.5717	3.7068
YLR418C	CDC73	Component of the Paf1p complex; binds to and modulates the activity of RNA polymerases I and II; required for expression of certain genes, modification of some histones, and telomere maintenance; involved in transcription elongation as demonstrated by the G-less-based run-on (GLRO) assay; protein abundance increases in response to DNA replication stress; human homologue, parafibromin, is a tumour…	III	4.37315	3.05482	2.48929	1.53844	-1.56407	-3.88599				IV	II	39.0836	1.73354
YJL014W	CCT3	Subunit of the cytosolic chaperonin Cct ring complex; related to Tcp1p, required for the assembly of actin and tubulins in vivo; capable of binding Q/N rich proteins and mediating their folding	III	2.60637	1.79182	0.727111	-0.529081	-1.05356	-2.24319					IV	253.702	11.2529
YBR109C	CMD1	Calmodulin; Ca++ binding protein that regulates Ca++ independent processes (mitosis, bud growth, actin organization, endocytosis, etc.) and Ca++ dependent processes (stress-activated pathways), targets include Nuf1p, Myo2p and calcineurin	III	2.6602	1.39419	0.407792	-0.426563	-0.885995	-2.30103					IV	398.395	17.6707
YNL232W	CSL4	Exosome non-catalytic core component; involved in 3'-5' RNA processing and degradation in both the nucleus and the cytoplasm; predicted to contain an S1 RNA binding domain; has similarity to human hCsl4p (EXOSC1)	III	3.15567	2.23125	1.06163	0.201468	-1.886					IV	III	83.3617	3.69748
YGL129C	RSM23	Mitochondrial ribosomal protein of the small subunit; has similarity to mammalian apoptosis mediator proteins; null mutation prevents induction of apoptosis by overproduction of metacaspase Mca1p	III	2.86415	2.14873	1.74204	0.861345	-2.30103				II			42.215	1.87243
YHL007C	STE20	Cdc42p-activated signal transducing kinase; involved in pheromone response, pseudohyphal/invasive growth, vacuole inheritance, down-regulation of sterol uptake; GBB motif binds Ste4p; member of the PAK (p21-activated kinase) family	III	3.69548	2.90836	2.54871	1.56702	-1.42894	-2.13402				III		58.9183	2.6133
YOL020W	TAT2	High affinity tryptophan and tyrosine permease; overexpression confers FK506 and FTY720 resistance	III	2.62756	1.35588	0.332295	0.067357	-1.52908	-3.88599	-3.88599	-3.88599				79.2222	3.51388
snR45	#N/A	#N/A	III	3.29211	2.76336	1.96712	0.495356	-0.98085	-3.88599						#N/A	#N/A
YIL124W	AYR1	Bifunctional triacylglycerol lipase and 1-acyl DHAP reductase; NADPH-dependent 1-acyl dihydroxyacetone phosphate reductase involved in phosphatidic acid biosynthesis; lipid droplet triacylglycerol lipase involved in the mobilization of non-polar lipids; found in lipid particles, the endoplasmic reticulum and the mitochondrial outer membrane; required for spore germination; role in cell wall biosy…	III	3.02297	2.4397	1.52725	0.435933	-1.07864	-2.30103	-2.88599	-3.88599				84.2585	3.73726
YNL248C	RPA49	RNA polymerase I subunit A49; essential for nucleolar assembly and for high polymerase loading rate; required for nucleolar localization of Rpa34p	III	3.10305	1.85425	0.24254	-0.564067	-1.886	-1.886					IV	232.673	10.3201
YPL090C	RPS6A	Protein component of the small (40S) ribosomal subunit; homologous to mammalian ribosomal protein S6, no bacterial homolog; RPS6A has a paralog, RPS6B, that arose from the whole genome duplication	III	2.6718	1.7963	1.02592	-0.132077	-1.00468	-2.18757	-2.80007				IV	231.639	10.2743
YDR458C	HEH2	Inner nuclear membrane (INM) protein; contains helix-extension-helix (HEH) motif, nuclear localization signal sequence; targeting to the INM requires the Srp1p-Kap95p karyopherins and the Ran cycle; HEH2 has a paralog, SRC1, that arose from the whole genome duplication	III	3.60455	2.84594	2.22396	1.42127	-0.18757	-2.88599	-3.88599	-3.88599		II	IV	31.553	1.39952
YMR231W	PEP5	Histone E3 ligase, component of CORVET membrane tethering complex; peripheral vacuolar membrane protein required for protein trafficking and vacuole biogenesis; interacts with Pep7p; involved in ubiquitylation and degradation of excess histones	III	2.72477	0.705241	0.443458	-0.067902	-1.886	-2.88599						23.6787	1.05026
YIL095W	PRK1	Protein serine/threonine kinase; regulates the organization and function of the actin cytoskeleton and reduces endocytic ability of cell through the phosphorylation of the Pan1p-Sla1p-End3p protein complex; PRK1 has a paralog, ARK1, that arose from the whole genome duplication	III	3.81646	2.43019	0.690474	0.189463	-0.445159	-0.911627	-3.71898				III	17.3575	0.769888
YKL033W-A		Putative protein of unknown function; similar to uncharacterized proteins from other fungi	III	2.80781	1.85756	1.83038	1.1398	1.00043	-2.88599					II	199.429	8.84561
YDR397C	NCB2	Subunit of a heterodimeric NC2 transcription regulator complex; complex binds to TBP and can repress transcription by preventing preinitiation complex assembly or stimulate activated transcription; homologous to human NC2beta; complex also includes Bur6p	III	2.95967	2.1842	1.29717	0.199927	-0.584536	-2.88599	-2.88599	-3.88599			II	87.4697	3.87969
YJL151C	SNA3	Protein involved in efficient MVB sorting of proteins to the vacuole; may function as an RSP5 adapter protein for MVB cargos; integral membrane protein localized to vacuolar intralumenal vesicles	III	2.41771	1.87677	1.56297	1.13436	0.520622	-3.88599						190.105	8.43206
YDR427W	RPN9	Non-ATPase regulatory subunit of the 26S proteasome; similar to putative proteasomal subunits in other species; null mutant is temperature sensitive and exhibits cell cycle and proteasome assembly defects; protein abundance increases in response to DNA replication stress; relocalizes to the cytosol in response to hypoxia	III	1.57106	1.469	0.486835	0.156018	-0.288513	-2.24319	-3.88599					164.985	7.31787
YER058W	PET117	Protein required for assembly of cytochrome c oxidase	III	2.9908	2.33669	2.06078	1.65556	0.776889	-2.88599	-3.88599	-3.88599	II		I	11.4322	0.507074
YGR082W	TOM20	Component of the TOM (translocase of outer membrane) complex; responsible for recognition and initial import steps for all mitochondrially directed proteins; acts as a receptor for incoming precursor proteins	III	4.93109	3.86883	2.55136	1.02505	-1.30103	-2.88599	-2.88599		I	IV		181.442	8.04779
YGR185C	TYS1	Cytoplasmic tyrosyl-tRNA synthetase; required for cytoplasmic protein synthesis; interacts with positions 34 and 35 of the tRNATyr anticodon; mutations in human ortholog YARS are associated with Charcot-Marie-Tooth (CMT) neuropathies; protein abundance increases in response to DNA replication stress	III	2.83542	2.1183	1.42573	0.675555	0.114005	-2.30103					III	411.821	18.2662
YLR143W	DPH6	Diphthamide synthetase; catalyzes the last amidation step of diphthamide biosynthesis using ammonium and ATP; evolutionarily conserved in eukaryotes; dph6 mutants exhibit diphthine accumulation and resistance to sordarin, which is indicative of defects in diphthamide formation on EF2; green fluorescent protein (GFP)-tagged protein localizes to the cytoplasm; DPH6/YLR143W is not an essential gene	III	3.30984	2.42796	1.04925	0.157606	-0.800073	-1.49493	-3.71898					33.148	1.47027
YHR143W	DSE2	Daughter cell-specific secreted protein with similarity to glucanases; degrades cell wall from the daughter side causing daughter to separate from mother; expression is repressed by cAMP	III	2.36521	1.47953	1.06163	0.398736	-0.677249	-2.80007	-2.80007					277.941	12.328
YLR002C	NOC3	Subunit of a nuclear complex with Noc2p and pre-replicative complexes; the Noc2p-Noc3p complex binds to 66S ribosomal precursors to mediate their maturation and intranuclear transport; binds to chromatin at active replication origins, and is required for pre-RC formation and maintenance during DNA replication licensing	III	2.65394	1.81634	1.21032	-0.98085	-1.75896	-2.18757					II	88.1074	3.90797
YLR367W	RPS22B	Protein component of the small (40S) ribosomal subunit; homologous to mammalian ribosomal protein S15A and bacterial S8; RPS22B has a paralog, RPS22A, that arose from the whole genome duplication	III	2.8559	2.45911	1.95172	0.252628	-1.27182	-1.886			IV			189.099	8.38742
YER030W	CHZ1	Histone chaperone for Htz1p/H2A-H2B dimer; required for the stabilization of the Chz1p-Htz1-H2B complex; has overlapping function with Nap1p; null mutant displays weak sensitivity to MMS and benomyl; contains a highly conserved CHZ motif; protein abundance increases in response to DNA replication stress	III	3.57482	1.99186	1.58369	-1.56407	-1.56407	-2.88599	-3.88599	-3.88599	IV	IV	I	116.965	5.18795
YNL129W	NRK1	Nicotinamide riboside kinase; catalyzes the phosphorylation of nicotinamide riboside and nicotinic acid riboside in salvage pathways for NAD+ biosynthesis	III	2.05257	1.20667	0.211846	0.125029	-0.564067	-2.30103	-2.88599	-3.88599			III	38.8941	1.72514
YPR165W	RHO1	GTP-binding protein of the rho subfamily of Ras-like proteins; involved in establishment of cell polarity; regulates protein kinase C (Pkc1p) and the cell wall synthesizing enzyme 1,3-beta-glucan synthase (Fks1p and Gsc2p)	III	3.60834	3.12045	1.66315	0.681931	-2.30103				IV		IV	478.277	21.2138
YLR335W	NUP2	Nucleoporin involved in nucleocytoplasmic transport; binds to either the nucleoplasmic or cytoplasmic faces of the nuclear pore complex depending on Ran-GTP levels; also has a role in chromatin organization	III	3.02041	2.46314	1.48683	0.696785	-0.043011	-0.147222	-3.88599	-3.88599				110.793	4.9142
YMR318C	ADH6	NADPH-dependent medium chain alcohol dehydrogenase; has broad substrate specificity; member of the cinnamyl family of alcohol dehydrogenases; may be involved in fusel alcohol synthesis or in aldehyde tolerance; protein abundance increases in response to DNA replication stress	III	1.20513	0.415464	0.340379	0.261169	0.088373	-2.71898	-3.71898		IV			352.275	15.625
YJL111W	CCT7	Subunit of the cytosolic chaperonin Cct ring complex; related to Tcp1p, required for the assembly of actin and tubulins in vivo; mutant has increased aneuploidy tolerance	III	3.98115	3.57909	2.51884	1.52124	-2.88599					IV	IV	160.434	7.11598
YHR135C	YCK1	Palmitoylated plasma membrane-bound casein kinase I (CK1) isoform; shares redundant functions with Yck2p in morphogenesis, proper septin assembly, endocytic trafficking, and glucose sensing; stabilized by Sod1p binding in the presence of glucose and oxygen, causing glucose repression of respiratory metabolism; YCK1 has a paralog, YCK2, that arose from the whole genome duplication	III	3.39626	2.53194	1.89989	-0.363571	-1.71898							64.6828	2.86899
YOR027W	STI1	Hsp90 cochaperone; regulates spatial organization of amyloid-like proteins in the cytosol, thereby buffering the proteotoxicity caused by amyloid-like proteins; interacts with the Ssa group of the cytosolic Hsp70 chaperones and activates Ssa1p ATPase activity; interacts with Hsp90 chaperones and inhibits their ATPase activity; homolog of mammalian Hop	III	4.00621	2.92265	2.01235	1.39216	-1.84239	-1.84239	-2.30103	-2.30103		III		284.314	12.6107
YDR380W	ARO10	Phenylpyruvate decarboxylase; catalyzes decarboxylation of phenylpyruvate to phenylacetaldehyde, which is the first specific step in the Ehrlich pathway; involved in protein N-terminal Met and Ala catabolism	III	3.50672	2.82118	2.1234	0.995317	-0.546468							11.8625	0.526156
YMR286W	MRPL33	Mitochondrial ribosomal protein of the large subunit	III	2.56011	1.71311	0.833739	0.388271	-1.886	-1.886	-3.88599		II			69.4676	3.08121
YBR162C	TOS1	Covalently-bound cell wall protein of unknown function; identified as a cell cycle regulated SBF target gene; deletion mutants are highly resistant to treatment with beta-1,3-glucanase; has sequence similarity to YJL171C	III	1.94287	1.13516	0.505075	-0.445159	-1.13402	-2.71898	-3.71898				I	487.685	21.6311
YOL147C	PEX11	Peroxisomal protein required for medium-chain fatty acid oxidation; also required for peroxisome proliferation, possibly by inducing membrane curvature; localization regulated by phosphorylation; transcription regulated by Adr1p and Pip2p-Oaf1p	III	3.64149	2.85327	1.9031	0.783862	0.349807	-3.71898			IV	IV	IV	30.0382	1.33234
YDR164C	SEC1	Sm-like protein involved in docking and fusion of exocytic vesicles; binds to assembled SNARE complexes at the membrane and stimulates membrane fusion; localization to sites of secretion (bud neck and bud tip) is dependent on SNARE function; interacts directly with essential exocyst subunit Sec6p	III	2.32408	1.23672	-0.041188	-0.511902	-0.658224	-2.88599					IV	34.1453	1.5145
YDR334W	SWR1	Swi2/Snf2-related ATPase; structural component of the SWR1 complex, which exchanges histone variant H2AZ (Htz1p) for chromatin-bound histone H2A; relocalizes to the cytosol in response to hypoxia; chronological aging factor that mediates lifespan extension by dietary restriction	III	2.05214	0.995317	0.588267	-0.080511	-1.49493	-2.71898					II	28.8583	1.28
YER105C	NUP157	Subunit of the inner ring of the nuclear pore complex (NPC); contributes to NPC assembly and tethering of DNA to the nuclear periphery; both Nup170p and NUP157p are similar to human Nup155p; NUP157 has a paralog, NUP170, that arose from the whole genome duplication	III	4.45293	3.56732	1.7704	1.33564	-1.02892	-2.71898	-2.71898					71.0941	3.15336
YEL042W	GDA1	Guanosine diphosphatase located in the Golgi; involved in the transport of GDP-mannose into the Golgi lumen by converting GDP to GMP after mannose is transferred its substrate	III	3.70942	1.94598	1.6287	-0.257432	-2.13402	-2.71898	-2.71898	-2.71898			IV	200.379	8.88773
YOR184W	SER1	3-phosphoserine aminotransferase; catalyzes the formation of phosphoserine from 3-phosphohydroxypyruvate, required for serine and glycine biosynthesis; regulated by the general control of amino acid biosynthesis mediated by Gcn4p; protein abundance increases in response to DNA replication stress	III	3.07953	2.49598	1.83995	1.69678	-0.564067	-1.07864	-2.30103	-3.88599	IV		IV	198.963	8.82492
YMR061W	RNA14	Component of the cleavage and polyadenylation factor I (CF I); CF 1, composed of the CF 1A complex (Rna14p, Rna15p, Clp1p, Pcf11p) and Hrp1, is involved in cleavage and polyadenylation of mRNA 3' ends; bridges interaction between Rna15p and Hrp1p in the CF I complex; mutant displays reduced transcription elongation in the G-less-based run-on (GLRO) assay; required for gene looping and maintenance…	III	2.15452	1.74918	0.853759	-0.363571	-0.800073	-3.71898				III		47.7274	2.11694
YOR095C	RKI1	Ribose-5-phosphate ketol-isomerase; catalyzes the interconversion of ribose 5-phosphate and ribulose 5-phosphate in the pentose phosphate pathway; participates in pyridoxine biosynthesis	III	3.09025	2.17892	1.32275	0.078742	-1.56407	-1.56407	-2.30103	-2.88599			I	161.686	7.17151
YER004W	FMP52	Protein of unknown function; localized to the mitochondrial outer membrane; induced by treatment with 8-methoxypsoralen and UVA irradiation	III	2.6375	1.9031	1.5337	-1.05356	-1.56407	-2.30103	-2.88599	-2.88599			IV	80.2	3.55725
YDL229W	SSB1	Cytoplasmic ATPase that is a ribosome-associated molecular chaperone; functions with J-protein partner Zuo1p; may be involved in folding of newly-made polypeptide chains; member of the HSP70 family; interacts with phosphatase subunit Reg1p; SSB1 has a paralog, SSB2, that arose from the whole genome duplication	III	4.08821	2.82482	1.26689	0.554841	-0.821078	-1.46156	-1.46156	-1.46156			I	1769.19	78.4718
YDR299W	BFR2	Component of the SSU and 90S preribosomes; involved in pre-18S rRNA processing; binds to U3 snoRNA and Mpp10p; multicopy suppressor of sensitivity to Brefeldin A; expression is induced during lag phase and also by cold shock	III	1.86695	0.81243	0.755766	0.696785								74.3192	3.2964
YPL243W	SRP68	Core component of the signal recognition particle (SRP) complex; SRP complex functions in targeting nascent secretory proteins to the endoplasmic reticulum (ER) membrane; relocalizes from cytoplasm to the nuclear periphery upon DNA replication stress	III	2.57538	0.712568	-0.093231	-0.602608	-1.39705	-1.39705					IV	128.968	5.72035
YJR066W	TOR1	PIK-related protein kinase and rapamycin target; subunit of TORC1, a complex that controls growth in response to nutrients by regulating translation, transcription, ribosome biogenesis, nutrient transport and autophagy; involved in meiosis; TOR1 has a paralog, TOR2, that arose from the whole genome duplication	III	2.45693	1.6287	1.03179	0.351196	-0.22908	-0.639446	-2.71898				IV	27.2633	1.20925
YLR110C	CCW12	Cell wall mannoprotein; plays a role in maintenance of newly synthesized areas of cell wall; localizes to periphery of small buds, septum region of larger buds, and shmoo tip; CCW12 has a paralog, YDR134C, that arose from the whole genome duplication	III	1.54317	1.19993	0.755766	0.241043	-0.173995	-0.428945	-1.13402	-3.71898	IV			10755.5	477.056
YDL191W	RPL35A	Ribosomal 60S subunit protein L35A; homologous to mammalian ribosomal protein L35 and bacterial L29; RPL35A has a paralog, RPL35B, that arose from the whole genome duplication	III	2.2192	1.44411	0.806607	0.322751	-0.426563	-1.56407	-1.56407					406.488	18.0296
YMR260C	TIF11	Translation initiation factor eIF1A; essential protein that forms a complex with Sui1p (eIF1) and the 40S ribosomal subunit and scans for the start codon; C-terminus associates with Fun12p (eIF5B); N terminus interacts with eIF2 and eIF3	III	1.15143	0.112368	-0.18757	-0.445159	-0.584536	-0.934334	-3.88599	-3.88599				981.503	43.5342
YLR323C	CWC24	General splicing factor; required for stable U2 snRNP binding to primary transcripts; essential for the first step of splicing; component of the pre-catalytic spliceosome complex containing Cef1p; similar to S. pombe Cwf24p	III	2.1842	0.958812	0.531398	-0.842394	-1.27182	-1.56407						19.0526	0.845071
YKR037C	SPC34	Essential subunit of the Dam1 complex (aka DASH complex); complex couples kinetochores to the force produced by MT depolymerization thereby aiding in chromosome segregation; also localized to nuclear side of spindle pole body	III	1.71932	0.925807	0.571055	0.261169	0.166727	0.077064	-0.147222	-2.13402				17.7272	0.786285
YOR187W	TUF1	Mitochondrial translation elongation factor Tu; comprises both GTPase and guanine nucleotide exchange factor activities, while these activities are found in separate proteins in S. pombe and humans	III	2.4541	1.64355	0.938361	-0.348244	-1.42894	-1.71898	-1.71898	-1.71898	I	IV		193.493	8.58232
YMR186W	HSC82	Cytoplasmic chaperone of the Hsp90 family; plays a role in determining prion variants; redundant in function and nearly identical with Hsp82p, and together they are essential; expressed constitutively at 10-fold higher basal levels than HSP82 and induced 2-3 fold by heat shock; contains two acid-rich unstructured regions that promote the solubility of chaperone-substrate complexes; HSC82 has a pa…	III	3.36654	2.36521	1.09004	0.690474	0.479534	-0.053564	-1.07864	-1.886			III	2027.78	89.9417
YPL254W	HFI1	Adaptor protein required for structural integrity of the SAGA complex; a histone acetyltransferase-coactivator complex that is involved in global regulation of gene expression through acetylation and transcription functions	III	2.31618	0.776889	0.054177	-0.428945	-0.718981						III	37.1102	1.64601
YOL109W	ZEO1	Peripheral membrane protein of the plasma membrane; interacts with Mid2p; regulates the cell integrity pathway mediated by Pkc1p and Slt2p; the authentic protein is detected in a phosphorylated state in highly purified mitochondria	III	2.06736	1.12422	0.683034	0.407792	-0.243186	-1.05356	-1.27182	-3.88599			II	2214.35	98.2166
YHR128W	FUR1	Uracil phosphoribosyltransferase; synthesizes UMP from uracil; involved in the pyrimidine salvage pathway	III	2.3485	1.43905	0.697877	0.032652	-0.885995	-1.56407	-2.30103	-3.88599			II	370.411	16.4295
YBR126W-B		Dubious open reading frame; unlikely to encode a functional protein, based on available experimental and comparative sequence data; partially overlaps the dubious ORF YBR126W-A; identified by SAGE	III	2.18869	1.57567	0.938361	0.819233	0.562971	-0.738831	-0.738831	-2.80007		IV		40.2605	1.78574
YNL119W	NCS2	Protein required for uridine thiolation of Lys(UUU) and Glu(UUC) tRNAs; required for the thiolation of uridine at the wobble position of Lys(UUU) and Glu(UUC) tRNAs; has a role in urmylation and in invasive and pseudohyphal growth; inhibits replication of Brome mosaic virus in S. cerevisiae	III	1.76388	0.926739	0.332295	-0.696529	-1.05356	-2.24319					IV	54.8368	2.43227
YDL226C	GCS1	ADP-ribosylation factor GTPase activating protein (ARF GAP); involved in ER-Golgi transport; required for prospore membrane formation; regulates phospholipase Spo14p; shares functional similarity with Glo3p; GCS1 has a paralog, SPS18, that arose from the whole genome duplication	III	2.14643	1.06078	-0.658224	-1.02892	-1.56407	-1.886	-1.886	-1.886			II	120.267	5.33442
YDR419W	RAD30	DNA polymerase eta; involved in translesion synthesis during post-replication repair; catalyzes the synthesis of DNA opposite cyclobutane pyrimidine dimers and other lesions; involved in formation of post-replicative damage-induced genome-wide cohesion; may also have a role in protection against mitochondrial mutagenesis; mutations in human pol eta are responsible for XPV	III	2.39739	1.92581	1.66259	1.07138	0.963145	-0.602608	-2.30103			III		15.2571	0.676723
YMR296C	LCB1	Component of serine palmitoyltransferase; responsible along with Lcb2p for the first committed step in sphingolipid synthesis, which is the condensation of serine with palmitoyl-CoA to form 3-ketosphinganine	III	1.45288	0.727111	0.538442	0.145228	-0.602608	-0.758957	-0.758957	-1.39705				114.276	5.06869
YBL061C	SKT5	Activator of Chs3p (chitin synthase III) during vegetative growth; recruits Chs3p to the bud neck via interaction with Bni4p; SKT5 has a paralog, SHC1, that arose from the whole genome duplication	III	2.20955	1.9539	0.415464	0.166727	0.166727	0.166727	0.065666	-0.758957				47.5838	2.11056
YKR006C	MRPL13	Mitochondrial ribosomal protein of the large subunit; not essential for mitochondrial translation	III	1.14061	-0.080511	-0.445159	-0.445159	-0.779369	-0.957405	-1.16055	-1.39705	I			67.0181	2.97257
YJR009C	TDH2	Glyceraldehyde-3-phosphate dehydrogenase (GAPDH), isozyme 2; involved in glycolysis and gluconeogenesis; tetramer that catalyzes reaction of glyceraldehyde-3-phosphate to 1,3 bis-phosphoglycerate; detected in cytoplasm and cell wall; protein abundance increases in response to DNA replication stress; GAPDH-derived antimicrobial peptides are active against a wide variety of wine-related yeasts and …	III	1.3323	0.434624	-0.132077	-0.658224	-1.27182	-2.24319	-2.24319				III	2019.8	89.5876
YFR036W	CDC26	Subunit of the Anaphase-Promoting Complex/Cyclosome (APC/C); which is a ubiquitin-protein ligase required for degradation of anaphase inhibitors, including mitotic cyclins, during the metaphase/anaphase transition; relocalizes to the cytosol in response to hypoxia	III	1.62813	0.460966	-0.696529	-1.07864	-1.07864	-1.07864					IV	24.1467	1.07102
YDR100W	TVP15	Integral membrane protein; localized to late Golgi vesicles along with the v-SNARE Tlg2p	III	1.5254	1.34038	1.03591	1.03591							III	59.5796	2.64263
YER057C	HMF1	Member of the p14.5 protein family; functionally complements Mmf1p function when targeted to mitochondria; heat shock inducible; high-dosage growth inhibitor; forms a homotrimer in vitro; HMF1 has a paralog, MMF1, that arose from the whole genome duplication	III	2.58937	0.892983	0.602947	0.528946							IV	232.419	10.3088
YNL249C	MPA43	Putative protein of unknown function; the authentic, non-tagged protein is detected in highly purified mitochondria in high-throughput studies	III	1.32612	0.134358	-0.160546	-0.397053	-0.549056							10.4594	0.463924
YKR016W	MIC60	Component of the MICOS complex; MICOS (formerly MINOS or MitOS) is a mitochondrial inner membrane complex that extends into the intermembrane space and has a role in the maintenance of crista junctions, inner membrane architecture, and formation of contact sites to the outer membrane; Mic60p is also involved in import of intermembrane space (IMS) proteins, probably by positioning Mia40p relative …	III	2.49417	1.80216	1.21032	0.86037	0.271128	0.187909	0.187909					37.7076	1.67251
YER088C	DOT6	Protein involved in rRNA and ribosome biogenesis; activated in stochastic pulses of nuclear localization; binds polymerase A and C motif; subunit of the RPD3L histone deacetylase complex; has chromatin specific SANT domain; involved in telomeric gene silencing and filamentation; relative distribution to the nucleus increases upon DNA replication stress	III	2.25904	1.61979	1.13436	-0.093231	-0.445159						III	58.7201	2.60451
YKL213C	DOA1	WD repeat protein required for ubiquitin-mediated protein degradation; forms a complex with Cdc48p; plays a role in controlling cellular ubiquitin concentration; also promotes efficient NHEJ in postdiauxic/stationary phase; facilitates N-terminus-dependent proteolysis of centromeric histone H3 (Cse4p) for faithful chromosome segregation; protein increases in abundance and relocalizes from nucleus…	III	1.44411	0.435933	0.020896	-1.30103	-1.30103	-1.30103						36.9223	1.63768
YML009W-B		Dubious open reading frame; unlikely to encode a functional protein, based on available experimental and comparative sequence data; deletion mutation confers an increase in Ty1 transposition	III	1.64468	0.728181	-0.185555	-0.426563	-0.426563	-2.88599	-2.88599	-2.88599			IV	3.6376	0.161345
YPL255W	BBP1	Protein required for the spindle pole body (SPB) duplication; localizes at the cytoplasmic side of the central plaque periphery of the SPB; forms a complex with a nuclear envelope protein Mps2p and SPB components Spc29p and Kar1p; required for mitotic functions of Cdc5p	III	1.95126	1.2569	0.658237	0.59504	0.59504	-0.738831	-1.71898				III	18.556	0.823046
YDR137W	RGP1	Subunit of a Golgi membrane exchange factor (Ric1p-Rgp1p); this complex catalyzes nucleotide exchange on Ypt6p	III	0.460966	-0.529081	-0.696529	-0.885995	-0.885995	-0.885995	-1.07864					23.4919	1.04197
YLR221C	RSA3	Protein with a likely role in ribosomal maturation; required for accumulation of wild-type levels of large (60S) ribosomal subunits; binds to the helicase Dbp6p in pre-60S ribosomal particles in the nucleolus	III	2.57023	1.59283	0.989296	0.055881	-0.394724	-1.30103	-1.56407	-2.30103			III	133.166	5.90654
YDL126C	CDC48	AAA ATPase; subunit of polyubiquitin-selective segregase complex involved in ERAD, cell wall integrity during heat stress, mitotic spindle disassembly; role in mobilizing membrane bound transcription factors by regulated ubiquitin/proteasome-dependent processing in macroautophagy, PMN, RAD, ribophagy, homotypic ER membrane fusion, disassembly of Met30p from SCF complex; human ortholog VCP can com…	III	1.95172	1.01915	0.03092	-1.42894	-1.42894	-1.71898	-1.71898	-1.71898				460.299	20.4164
YOR295W	UAF30	Subunit of UAF (upstream activation factor) complex; UAF is an RNA polymerase I specific transcription stimulatory factor composed of Uaf30p, Rrn5p, Rrn9p, Rrn10p, histones H3 and H4; targeting factor for the UAF that facilitates activation of many rDNA genes; deletion decreases cellular growth rate; UAF30 has a paralog, TRI1, that arose from the whole genome duplication	III	1.25765	0.799743	0.416791	0.146829	-0.158568	-1.24319	-1.886				III	19.5346	0.866449
YBL041W	PRE7	Beta 6 subunit of the 20S proteasome	III	1.04259	0.994428	0.718783	0.450944								159.834	7.0894
YDR382W	RPP2B	Ribosomal protein P2 beta; a component of the ribosomal stalk, which is involved in the interaction between translational elongation factors and the ribosome; free (non-ribosomal) P2 stimulates the phosphorylation of the eIF2 alpha subunit (Sui2p) by Gcn2p; regulates the accumulation of P1 (Rpp1Ap and Rpp1Bp) in the cytoplasm	III	1.56821	1.17362	0.282475	-0.639446	-1.42894	-1.75896	-2.18757	-2.71898			IV	3732.29	165.544
YGR231C	PHB2	Subunit of the prohibitin complex (Phb1p-Phb2p); prohibitin is a 1.2 MDa ring-shaped inner mitochondrial membrane chaperone that stabilizes newly synthesized proteins; determinant of replicative life span; involved in mitochondrial segregation; prohibitin deficiency induces a mitochondrial unfolded protein response (mtUPR)	III	1.82988	1.55484	1.30132	-0.055403	-0.160546	-0.412911	-3.88599	-3.88599	II			110.664	4.90847
YIL106W	MOB1	Component of the mitotic exit network; associates with and is required for the activation and Cdc15p-dependent phosphorylation of the Dbf2p kinase; required for cytokinesis and cell separation; component of the CCR4 transcriptional complex; relocalizes from cytoplasm to the nuclear periphery upon DNA replication stress	III	2.42094	1.30275	0.547877	0.168303	-0.779369	-1.84239	-2.24319					36.1101	1.60165
YKL016C	ATP7	Subunit d of the stator stalk of mitochondrial F1F0 ATP synthase; F1F0 ATP synthase is a large, evolutionarily conserved enzyme complex required for ATP synthesis	III	2.50022	1.655	0.495356	0.495356	0.424416	0.088373	-3.71898		IV		IV	159.571	7.0777
YGR282C	BGL2	Endo-beta-1,3-glucanase; major protein of the cell wall, involved in cell wall maintenance; involved in incorporation of newly synthesized mannoprotein molecules into the cell wall	III	2.92107	1.37841	0.839454	0.579094	0.579094	0.281019	0.088373	-1.13402	IV	IV	II	743.793	32.9907
YLR333C	RPS25B	Protein component of the small (40S) ribosomal subunit; homologous to mammalian ribosomal protein S25, no bacterial homolog; RPS25B has a paralog, RPS25A, that arose from the whole genome duplication	III	1.89119	1.27333	0.506323	-0.07864	-0.564067	-2.30103	-2.30103	-2.30103				1163.22	51.5943
YGL136C	MRM2	Mitochondrial 2' O-ribose methyltransferase; required for methylation of U(2791) in 21S rRNA; MRM2 deletion confers thermosensitive respiration and loss of mitochondrial DNA; has similarity to Spb1p and Trm7p, and to E. coli FtsJ/RrmJ	III	2.4042	1.16752	0.826005	0.442155	0.359174	-1.42894	-1.42894					17.6171	0.7814
YBR052C	RFS1	Protein of unknown function; member of a flavodoxin-like fold protein family that includes Pst2p and Ycp4p; green fluorescent protein (GFP)-fusion protein localizes to the cytoplasm in a punctate pattern; RFS1 has a paralog, PST2, that arose from the whole genome duplication	III	2.79208	1.96451	0.506323	0.361933	-0.426563	-0.426563	-2.88599	-2.88599			I	98.0204	4.34766
YOR168W	GLN4	Glutamine tRNA synthetase; monomeric class I tRNA synthetase that catalyzes the specific glutaminylation of tRNA(Gln); N-terminal domain proposed to be involved in enzyme-tRNA interactions	III	2.54317	1.4789	0.777922	-0.494925	-1.00468	-1.21511	-1.80007	-3.88599			IV	379.033	16.8119
YIL063C	YRB2	Protein of unknown function; involved in nuclear processes of the Ran-GTPase cycle; involved in nuclear protein export; contains Ran Binding Domain and FxFG repeats; interacts with Srm1p, GTP-Gsp1p, Rna1p and Crm1p; relocalizes to the cytosol in response to hypoxia; not essential for viability	III	2.8361	0.839454	0.783862	0.665806	-1.42894	-1.42894	-1.42894	-1.42894				61.7484	2.73883
YKL160W	ELF1	Transcription elongation factor with a conserved zinc finger domain; implicated in the maintenance of proper chromatin structure in actively transcribed regions; deletion inhibits Brome mosaic virus (BMV) gene expression	III	2.37448	2.16751	0.833739	0.460966	-0.677249	-0.677249	-1.30103				IV	145.939	6.47306
YMR188C	MRPS17	Mitochondrial ribosomal protein of the small subunit	III	1.60353	1.08921	0.783862	0.658237	0.528946				III		IV	38.0378	1.68715
YGL058W	RAD6	Ubiquitin-conjugating enzyme (E2); involved in postreplication repair as a heterodimer with Rad18p, regulation of K63 polyubiquitination in response to oxidative stress, DSBR and checkpoint control as a heterodimer with Bre1p, ubiquitin-mediated N-end rule protein degradation as a heterodimer with Ubr1p, as well as endoplasmic reticulum-associated protein degradation (ERAD) with Ubr1p in the abse…	III	1.63971	1.43839	1.15063	0.963145	-0.911627				IV			106.205	4.71069
YDR098C	GRX3	Glutathione-dependent oxidoreductase; hydroperoxide and superoxide-radical responsive; monothiol glutaredoxin subfamily member along with Grx4p and Grx5p; protects cells from oxidative damage; with Grx4p, binds to Aft1p in iron-replete conditions, promoting its dissociation from promoters; evidence exists indicating that the translation start site is not Met1 as currently annotated, but rather Me…	III	2.42061	1.83945	1.03591									127.414	5.65142
YPR107C	YTH1	Essential RNA-binding component of cleavage and polyadenylation factor; contains five zinc fingers; required for pre-mRNA 3'-end processing and polyadenylation; relocalizes to the cytosol in response to hypoxia	III	2.66608	1.94102	-0.303215	-0.758957	-1.13402	-1.13402						22.5665	1.00093
YDL081C	RPP1A	Ribosomal stalk protein P1 alpha; involved in the interaction between translational elongation factors and the ribosome; free (non-ribosomal) P1 stimulates the phosphorylation of the eIF2 alpha subunit (Sui2p) by Gcn2p; accumulation of P1 in the cytoplasm is regulated by phosphorylation and interaction with the P2 stalk component	III	3.22268	2.22652	1.36521	0.572246	0.416791	-0.494925	-1.46156	-2.88599			IV	3670.92	162.822
YPR179C	HDA3	Subunit of the HDA1 histone deacetylase complex; possibly tetrameric trichostatin A-sensitive class II histone deacetylase complex contains Hda1p homodimer and an Hda2p-Hda3p heterodimer; required for the activity of the complex; relocalizes to the cytosol in response to hypoxia; similar to Hda2p	III	2.75806	1.64411	1.18946	0.123405	-0.080511	-0.620909	-2.24319	-2.80007				14.8952	0.660673
YHR195W	NVJ1	Nuclear envelope protein; anchored to the nuclear inner membrane, that interacts with the vacuolar membrane protein Vac8p to promote formation of nucleus-vacuole junctions during piecemeal microautophagy of the nucleus (PMN)	III	1.45224	0.97018	0.86037	0.415464	-1.886							26.3435	1.16846
YOL013W-A		Putative protein of unknown function; identified by SAGE	III	1.68303	1.2059	0.313143	-0.677249	-1.07864							#N/A	#N/A
YGL079W	KXD1	Subunit of the BLOC-1 complex involved in endosomal maturation; null mutant is sensitive to drug inducing secretion of vacuolar cargo; GFP-fusion protein localizes to the endosome	III	1.48319	1.16752	0.97018	0.067357	-0.658224	-0.658224	-1.56407	-1.56407				29.6384	1.3146
YGR148C	RPL24B	Ribosomal 60S subunit protein L24B; not essential for translation but may be required for normal translation rate; homologous to mammalian ribosomal protein L24, no bacterial homolog; RPL24B has a paralog, RPL24A, that arose from the whole genome duplication	III	2.51349	1.62425	0.939285	0.292289	-0.363571	-0.639446	-2.80007					1682.29	74.6174
YIR023W	DAL81	Positive regulator of genes in multiple nitrogen degradation pathways; contains DNA binding domain but does not appear to bind the dodecanucleotide sequence present in the promoter region of many genes involved in allantoin catabolism	III	2.52394	2.09524	1.84662	-0.885995	-1.56407	-1.56407	-1.56407	-1.56407			III	25.5604	1.13372
YOR127W	RGA1	GTPase-activating protein for polarity-establishment protein Cdc42p; implicated in control of septin organization, pheromone response, and haploid invasive growth; relocalizes from bud neck to cytoplasm upon DNA replication stress; RGA1 has a paralog, RGA2, that arose from the whole genome duplication	III	3.03406	2.65119	0.564169	0.146829	-0.379063	-1.46156				IV		31.3974	1.39262
YIR030C	DCG1	Protein of unknown function; expression is sensitive to nitrogen catabolite repression and regulated by Dal80p; contains transmembrane domain	III	1.33704	0.020896	-1.07864	-1.07864	-1.07864	-1.56407						8.65042	0.383687
YML006C	GIS4	CAAX box containing protein of unknown function; proposed to be involved in the RAS/cAMP signaling pathway	III	1.36055	1.04925	0.719858	-0.333078	-0.800073	-1.84239	-3.71898					28.8279	1.27865
YJL131C	AIM23	Mitochondrial translation initiation factor 3 (IF3, mIF3); evolutionarily conserved; binds to E. coli ribosomes in vitro; null mutant displays severe respiratory growth defect and elevated frequency of mitochondrial genome loss	III	1.3738	1.07706	1.07706	1.03005	1.03005	1.03005	-3.71898		III			7.23249	0.320795
YPL226W	NEW1	ATP binding cassette protein; cosediments with polysomes and is required for biogenesis of the small ribosomal subunit; Asn/Gln-rich rich region supports [NU+] prion formation and susceptibility to [PSI+] prion induction	III	1.53905	0.833739	0.232381	-1.24319	-1.886	-1.886	-1.886	-2.30103				333.772	14.8043
YPR124W	CTR1	High-affinity copper transporter of the plasma membrane; mediates nearly all copper uptake under low copper conditions; transcriptionally induced at low copper levels and degraded at high copper levels; protein increases in abundance and relocalizes from nucleus to plasma membrane upon DNA replication stress	III	1.45661	1.38369	0.798726	-0.549056	-0.549056	-2.71898			II	IV		56.1302	2.48964
YBL026W	LSM2	Lsm (Like Sm) protein; part of heteroheptameric complexes (Lsm2p-7p and either Lsm1p or 8p): cytoplasmic Lsm1p complex involved in mRNA decay; nuclear Lsm8p complex part of U6 snRNP and possibly involved in processing tRNA, snoRNA, and rRNA; relocalizes from nucleus to cytoplasmic foci upon DNA replication stress	III	2.04303	1.50867	0.546665	0.321334	-0.043011	-0.412911	-3.88599				I	135.551	6.01232
YOR075W	UFE1	t-SNARE protein required for retrograde vesicular traffic; involved in Sey1p-independent homotypic ER fusion; required for efficient nuclear fusion during mating; forms a complex with the SNAREs Sec22p, Sec20p and Use1p to mediate fusion of Golgi-derived vesicles at the ER	III	1.07874	0.620937	-0.22908	-0.22908	-0.494925	-1.71898	-1.71898	-1.71898				20.1956	0.89577
YBL099W	ATP1	Alpha subunit of the F1 sector of mitochondrial F1F0 ATP synthase; which is a large, evolutionarily conserved enzyme complex required for ATP synthesis; F1 translationally regulates ATP6 and ATP8 expression to achieve a balanced output of ATP synthase genes encoded in nucleus and mitochondria; phosphorylated; N-terminally propionylated in vivo	III	0.847116	0.452238	0.369852	-0.067902	-0.288513	-0.288513	-0.412911	-0.911627	III		III	228.492	10.1347
YDL097C	RPN6	Essential, non-ATPase regulatory subunit of the 26S proteasome lid; required for the assembly and activity of the 26S proteasome; the human homolog (S9 protein) partially rescues Rpn6p depletion; protein abundance increases in response to DNA replication stress	III	2.54636	1.95081	1.48683	0.711487	-0.911627	-1.13402						145.401	6.4492
YLR405W	DUS4	Dihydrouridine synthase; member of a widespread family of conserved proteins including Smm1p, Dus1p, and Dus3p	III	2.81804	1.48747	1.08921	-1.46156	-1.75896	-1.75896	-2.18757	-2.18757			II	29.2342	1.29667
YDR245W	MNN10	Subunit of a Golgi mannosyltransferase complex; complex mediates elongation of the polysaccharide mannan backbone; membrane protein of the mannosyltransferase family; other members of the complex are Anp1p, Mnn9p, Mnn11p, and Hoc1p	III	2.80216	1.97932	1.37841	-0.273959	-0.412911	-0.549056	-0.718981				IV	128.171	5.68498
YER011W	TIR1	Cell wall mannoprotein; expression is downregulated at acidic pH and induced by cold shock and anaerobiosis; abundance is increased in cells cultured without shaking; member of the Srp1p/Tip1p family of serine-alanine-rich proteins	III	1.46097	1.01915	0.86037	0.86037	0.330888	-0.98085	-1.80007					85.6269	3.79795
YMR219W	ESC1	Protein localized to the nuclear periphery; involved in telomeric silencing; interacts with PAD4-domain of Sir4p	III	2.2747	1.85658	0.168303	-0.677249	-1.56407	-1.886	-1.886					17.882	0.793151
YGL030W	RPL30	Ribosomal 60S subunit protein L30; involved in pre-rRNA processing in the nucleolus; autoregulates splicing of its transcript; homologous to mammalian ribosomal protein L30, no bacterial homolog	III	1.17892	0.945517	0.719858	-0.658224	-1.02892	-2.24319	-2.80007		III		IV	1966.39	87.2186
YPL032C	SVL3	Protein of unknown function; mutant phenotype suggests a potential role in vacuolar function; green fluorescent protein (GFP)-fusion protein localizes to the cell periphery, cytoplasm, bud, and bud neck; relocalizes from bud neck to cytoplasm upon DNA replication stress; SVL3 has a paralog, PAM1, that arose from the whole genome duplication	III	2.98628	2.01114	1.62482	1.09648	0.453532	-0.426563	-0.71607	-3.88599	IV	IV		76.0612	3.37367
YMR225C	MRPL44	Mitochondrial ribosomal protein of the large subunit; protein abundance increases in response to DNA replication stress	III	1.99876	1.32204	1.24179	0.689377	0.495356	-0.273959	-2.80007		I		III	33.7441	1.49671
YOR078W	BUD21	Component of small ribosomal subunit (SSU) processosome; this complex contains U3 snoRNA; required at post-transcriptional step for efficient retrotransposition; absence results in decreased Ty1 Gag:GFP protein levels; originally isolated as bud-site selection mutant that displays a random budding pattern	III	2.87072	2.20475	1.10682	0.651756	0.123405	-0.067902	-0.318069	-3.88599			IV	133.392	5.91654
YPL087W	YDC1	Alkaline dihydroceramidase, involved in sphingolipid metabolism; preferentially hydrolyzes dihydroceramide to a free fatty acid and dihydrosphingosine; has a minor reverse activity; YDC1 has a paralog, YPC1, that arose from the whole genome duplication	III	2.64546	1.36055	1.01915	0.546665	0.251141	0.077064	-0.018542		III			34.2747	1.52024
YER007C-A	TMA20	Protein of unknown function that associates with ribosomes; has a putative RNA binding domain; interacts with Tma22p; null mutant exhibits translation defects; has homology to human oncogene MCT-1; protein abundance increases in response to DNA replication stress	III	2.62007	2.32886	1.10764	0.262646	0.178922	-0.564067	-1.07864					140.587	6.23569
YAL062W	GDH3	NADP(+)-dependent glutamate dehydrogenase; synthesizes glutamate from ammonia and alpha-ketoglutarate; rate of alpha-ketoglutarate utilization differs from Gdh1p; expression regulated by nitrogen and carbon sources; GDH3 has a paralog, GDH1, that arose from the whole genome duplication	III	0.530173	-0.043011	-0.043011	-0.043011	-0.147222	-0.25955						5.0892	0.22573
YKL181W	PRS1	5-phospho-ribosyl-1(alpha)-pyrophosphate synthetase; synthesizes PRPP, which is required for nucleotide, histidine, and tryptophan biosynthesis; plays a key role in cell wall integrity (CWI) pathway; one of five related enzymes, which are active as heteromultimeric complexes; missense mutations in human homolog PRPS1 are associated with neuropathic Arts syndrome and Charcot-Marie Tooth (CMTX5) di…	III	3.15507	1.76336	0.272595	-0.934334	-1.13402							317.459	14.0808
YDR225W	HTA1	Histone H2A; core histone protein required for chromatin assembly and chromosome function; one of two nearly identical subtypes (see also HTA2); DNA damage-dependent phosphorylation by Mec1p facilitates DNA repair; acetylated by Nat4p; N-terminally propionylated in vivo	III	2.4789	1.21032	0.674446	0.388271	-0.620909	-1.00468	-2.18757	-3.88599			I	961.285	42.6375
YDR304C	CPR5	Peptidyl-prolyl cis-trans isomerase (cyclophilin) of the ER; catalyzes the cis-trans isomerization of peptide bonds N-terminal to proline residues; transcriptionally induced in response to unfolded proteins in the ER; CPR5 has a paralog, CPR2, that arose from the whole genome duplication	III	2.1402	1.17362	0.460966	-0.160546	-0.160546	-0.288513	-3.88599	-3.88599			II	313.922	13.9239
YLR456W		Putative pyridoxal 5'-phosphate synthase; null mutant displays increased resistance to antifungal agents gliotoxin, cycloheximide and H2O2; YLR456W has a paralog, YPR172W, that arose from the whole genome duplication	III	2.13163	0.813438	-1.27182	-1.27182	-1.56407	-1.56407	-1.56407	-2.88599				13.6282	0.604475
YOR007C	SGT2	Glutamine-rich cytoplasmic cochaperone; serves as a scaffold bringing together Get4, Get5p, and other TRC complex members that are required to mediate posttranslational insertion of tail-anchored proteins into the ER membrane; interacts with the prion domain of Sup35p; amyloid sensor; plays a role in targeting chaperones to prion aggregates; similar to human cochaperone SGT; forms cytoplasmic foc…	III	1.80952	0.644113	0.101246	-0.511902	-1.07864	-1.07864	-1.56407					472.332	20.9501
YBR127C	VMA2	Subunit B of V1 peripheral membrane domain of vacuolar H+-ATPase; electrogenic proton pump found throughout the endomembrane system; contains nucleotide binding sites; also detected in the cytoplasm; protein abundance increases in response to DNA replication stress; human homolog ATP6V1B1 implicated in autosomal-recessive distal renal tubular acidosis (RTA) with sensorineural deafness; human ATP6…	III	3.67646	1.85474	1.17362	0.496612	0.168303	-0.119012	-0.620909	-0.779369		II	IV	731.572	32.4486
YPR105C	COG4	Essential component of the conserved oligomeric Golgi complex; a cytosolic tethering complex (Cog1p through Cog8p) that functions in protein trafficking to mediate fusion of transport vesicles to Golgi compartments	III	1.58768	1.2461	1.2461	1.05993								45.0139	1.99657
YGL173C	XRN1	Evolutionarily-conserved 5'-3' exonuclease; component of cytoplasmic processing (P) bodies involved in mRNA decay; also enters the nucleus and positively regulates transcription initiation and elongation; plays a role in microtubule-mediated processes, filamentous growth, ribosomal RNA maturation, and telomere maintenance; activated by the scavenger decapping enzyme Dcs1p	III	1.91585	1.75169	1.65444	-0.397053	-0.397053	-1.13402						211.486	9.38038
YOR286W	RDL2	Protein with rhodanese activity; contains a rhodanese-like domain similar to Rdl1p, Uba4p, Tum1p, and Ych1p; overexpression causes a cell cycle delay; null mutant displays elevated frequency of mitochondrial genome loss	III	3.73239	2.83324	1.55951	0.388271	-0.494925	-0.658224	-0.658224	-1.75896	I			122.96	5.45387
YGR095C	RRP46	Exosome non-catalytic core component; involved in 3'-5' RNA processing and degradation in both the nucleus and the cytoplasm; has similarity to E. coli RNase PH and to human hRrp46p (EXOSC5)	III	2.1917	1.58428	0.211846	0.032652	-0.07864	-2.30103						73.2673	3.24975
YDR115W		Putative mitochondrial ribosomal protein of the large subunit; similar to E. coli L34 ribosomal protein; required for respiratory growth, as are most mitochondrial ribosomal proteins; protein increases in abundance and relocalizes to the plasma membrane upon DNA replication stress	III	0.964053	0.495356	0.271128	0.187909	0.187909	0.187909	-3.71898		I			65.2023	2.89203
YKR042W	UTH1	Mitochondrial inner membrane protein; role in mitophagy is disputed; implicated in cell wall biogenesis, the oxidative stress response, life span during starvation, and cell death; SUN family member; UTH1 has a paralog, NCA3, that arose from the whole genome duplication	III	1.1234	0.635289	0.340379	0.156018	-0.445159	-0.934334	-1.13402	-1.13402			II	723.21	32.0777
YMR112C	MED11	Subunit of the RNA polymerase II mediator complex; associates with core polymerase subunits to form the RNA polymerase II holoenzyme; essential protein	III	2.5284	2.0043	1.55076	0.906769	-0.301032	-0.426563	-1.07864	-1.56407			II	39.2664	1.74165
YPL107W		Putative protein of unknown function; green fluorescent protein (GFP)-fusion protein localizes to mitochondria; YPL107W is not an essential gene	III	1.96496	0.880988	-0.171999	-0.410556	-0.546468	-2.30103	-2.88599	-2.88599		IV		11.9128	0.528389
YNL131W	TOM22	Component of the TOM (Translocase of Outer Membrane) complex; responsible for initial import of mitochondrially directed proteins; mediates interaction between TOM and TIM complexes and acts as a receptor for precursor proteins	III	2.387	1.71676	0.983251	0.636429	0.425735	0.272595	-2.80007		I		II	280.284	12.4319
YNL221C	POP1	Subunit of both RNase MRP and nuclear RNase P; RNase MRP cleaves pre-rRNA, while nuclear RNase P cleaves tRNA precursors to generate mature 5' ends and facilitates turnover of nuclear RNAs; binds to the RPR1 RNA subunit in RNase P	III	0.379091	-0.273959	-0.397053	-0.397053	-0.397053	-0.397053	-0.718981					45.2797	2.00837
YOR375C	GDH1	NADP(+)-dependent glutamate dehydrogenase; synthesizes glutamate from ammonia and alpha-ketoglutarate; rate of alpha-ketoglutarate utilization differs from Gdh3p; expression regulated by nitrogen and carbon sources; GDH1 has a paralog, GDH3, that arose from the whole genome duplication	III	0.893936	-0.461558	-0.957405	-0.957405	-0.957405	-1.39705	-1.39705	-1.39705			II	332.337	14.7407
YMR266W	RSN1	Membrane protein of unknown function; overexpression suppresses NaCl sensitivity of sro7 mutant cells by restoring sodium pump (Ena1p) localization to the plasma membrane	III	2.8644	1.89763	0.854738	-0.041188	-0.546468	-1.56407	-2.88599	-2.88599			IV	128.319	5.69155
YOR211C	MGM1	Mitochondrial GTPase, present in complex with Ugo1p and Fzo1p; required for mitochondrial morphology, fusion, and genome maintenance; exists as long and short form with different distributions; ratio of long to short forms is regulated by Psd1p; homolog of human OPA1 involved in autosomal dominant optic atrophy	III	2.45693	1.1797	-0.132077	-0.363571	-1.75896				III			32.1897	1.42776
YBR244W	GPX2	Phospholipid hydroperoxide glutathione peroxidase; protects cells from phospholipid hydroperoxides and nonphospholipid peroxides during oxidative stress; induced by glucose starvation; protein abundance increases in response to DNA replication stress	III	1.56417	1.3076	0.674446	0.478263	0.166727	0.077064	-0.147222	-0.273959				149.589	6.63497
YBR083W	TEC1	Transcription factor targeting filamentation genes and Ty1 expression; Ste12p activation of most filamentation gene promoters depends on Tec1p and Tec1p transcriptional activity is dependent on its association with Ste12p; binds to TCS elements upstream of filamentation genes, which are regulated by Tec1p/Ste12p/Dig1p complex; competes with Dig2p for binding to Ste12p/Dig1p; positive regulator of…	III	1.56357	0.906769	0.74151	0.261169	-0.738831	-0.738831	-1.16055	-3.88599				45.7255	2.02814
YGL130W	CEG1	Guanylyltransferase involved in mRNA 5' capping; subunit of the mRNA capping enzyme, which is a heterotetramer composed of two molecules of Ceg1p and a homodimer of Cet1p, the mRNA 5'-triphosphatase subunit; nuclear import of Ceg1p requires interaction with Cet1p; mammalian capping enzyme is a single bifunctional polypeptide	III	2.49449	1.74614	0.478263	0.077064	-0.030724	-1.13402						35.5661	1.57752
YER080W	AIM9	Putative protein of unknown function; the authentic, non-tagged protein is detected in highly purified mitochondria in high-throughput studies; null mutant displays elevated frequency of mitochondrial genome loss	III	2.39966	0.651756	-0.257432	-0.394724						IV		92.0048	4.08084
YHR020W		Prolyl-tRNA synthetase; N-terminal domain shows weak homology to prokaryotic posttransfer editing domain, but does not possess posttransfer editing activity; may interact with ribosomes, based on co-purification experiments	III	2.22396	1.29229	0.46964	0.397392	0.156018	0.065666	0.065666				IV	483.811	21.4593
YBL033C	RIB1	GTP cyclohydrolase II; catalyzes the first step of the riboflavin biosynthesis pathway	III	2.67013	1.36452	0.762841	-0.934334								45.7955	2.03124
YBR260C	RGD1	GTPase-activating protein (RhoGAP) for Rho3p and Rho4p; possibly involved in control of actin cytoskeleton organization	III	2.91655	1.90996	0.777922	-0.842394	-1.02892	-1.02892	-1.80007	-2.88599		IV	II	30.3534	1.34632
YNL227C	JJJ1	Co-chaperone that stimulates the ATPase activity of Ssa1p; required for a late step of ribosome biogenesis; associated with the cytosolic large ribosomal subunit; contains a J-domain; mutation causes defects in fluid-phase endocytosis	III	1.37516	0.668037	0.114005	-0.301032	-0.301032	-0.885995	-3.88599		IV			26.9705	1.19627
YOR260W	GCD1	Gamma subunit of the translation initiation factor eIF2B; the guanine-nucleotide exchange factor for eIF2; activity subsequently regulated by phosphorylated eIF2; first identified as a negative regulator of GCN4 expression	III	2.36882	1.25616	0.042595	-0.318069							IV	167.52	7.43028
YHR021C	RPS27B	Protein component of the small (40S) ribosomal subunit; homologous to mammalian ribosomal protein S27, no bacterial homolog; RPS27B has a paralog, RPS27A, that arose from the whole genome duplication	III	2.25727	1.73072	0.933025	0.443458	-0.119012	-0.86403	-1.05356	-1.27182				998.406	44.2839
YOR220W	RCN2	Protein of unknown function; green fluorescent protein (GFP)-fusion protein localizes to the cytoplasm; phosphorylated in response to alpha factor; protein abundance increases in response to DNA replication stress	III	1.37909	0.689377	0.187909	0.088373								48.2836	2.1416
YDR346C	SVF1	Protein with a potential role in cell survival pathways; required for the diauxic growth shift; expression in mammalian cells increases survival under conditions inducing apoptosis; mutant has increased aneuploidy tolerance	III	2.31484	1.84044	1.45661	0.351196	-0.98085	-1.71898	-1.71898	-2.13402				214.945	9.5338
YHL031C	GOS1	v-SNARE protein involved in Golgi transport; homolog of the mammalian protein GOS-28/GS28	III	1.51768	0.919489	0.359174	0.281019	0.281019	0.281019	-0.134019	-3.71898		IV		35.554	1.57699
YOL093W	TRM10	tRNA methyltransferase; methylates the N-1 position of guanine at position 9 in tRNAs; protein abundance increases in response to DNA replication stress; member of the SPOUT (SpoU-TrmD) methyltransferase family; human ortholog TRMT10A plays a role in the pathogenesis of microcephaly and early onset diabetes; an 18-mer originates from the TRM10 locus; genetic analysis shows the 18-mer is the trans…	III	1.74509	1.40646	1.19916	0.088373	-0.134019							34.7308	1.54047
YMR126C	DLT1	Protein of unknown function; mutant sensitive to 6-azauracil (6AU) and mycophenolic acid (MPA)	III	1.51287	0.762841	0.406457	0.065666							III	21.1896	0.93986
YPL139C	UME1	Component of both the Rpd3S and Rpd3L histone deacetylase complexes; negative regulator of meiosis; required for repression of a subset of meiotic genes during vegetative growth, binding of histone deacetylase Rpd3p required for activity, contains a NEE box and a WD repeat motif; homologous with Wtm1p; UME1 has a paralog, WTM2, that arose from the whole genome duplication	III	1.43839	1.05418	0.635289	0.495356	-0.584536	-0.758957	-2.88599	-2.88599			IV	19.3585	0.858641
YJL191W	RPS14B	Protein component of the small (40S) ribosomal subunit; required for ribosome assembly and 20S pre-rRNA processing; mutations confer cryptopleurine resistance; homologous to mammalian ribosomal protein S14 and bacterial S11; RPS14B has a paralog, RPS14A, that arose from the whole genome duplication	III	1.632	0.756814	0.636429	0.505075	0.434624	-0.333078	-1.16055	-3.88599				219.781	9.7483
YPL037C	EGD1	Subunit beta1 of the nascent polypeptide-associated complex (NAC); involved in protein targeting, associated with cytoplasmic ribosomes; enhances DNA binding of the Gal4p activator; homolog of human BTF3b; EGD1 has a paralog, BTT1, that arose from the whole genome duplication	III	3.18907	2.04012	-0.394724	-1.30103	-1.56407	-1.886	-2.30103	-2.30103				1242.15	55.0952
YIL021W	RPB3	RNA polymerase II third largest subunit B44; part of central core; similar to prokaryotic alpha subunit	III	0.932098	0.619785	0.415464	0.340379	0.251141							89.2127	3.957
YKL112W	ABF1	DNA binding protein with possible chromatin-reorganizing activity; involved in transcriptional activation, gene silencing, and DNA replication and repair	III	2.68462	2.12147	1.52663	0.964961	0.272595	-0.363571	-2.30103	-2.88599			III	51.8187	2.2984
YJL117W	PHO86	Endoplasmic reticulum (ER) resident protein; required for ER exit of the high-affinity phosphate transporter Pho84p, specifically required for packaging of Pho84p into COPII vesicles; protein abundance increases in response to DNA replication stress	III	2.54788	1.9992	1.59738	1.07958	0.771957	-1.05356	-1.05356	-3.88599				177.328	7.86533
YNL157W	IGO1	Protein required for initiation of G0 program; prevents degradation of nutrient-regulated mRNAs via the 5'-3' mRNA decay pathway; phosphorylated by Rim15p; GFP protein localizes to the cytoplasm and nucleus; IGO1 has a paralog, IGO2, that arose from the whole genome duplication	III	1.64298	1.51225	0.166727	0.077064	-0.018542							102.636	4.55239
YNR051C	BRE5	Ubiquitin protease cofactor; forms deubiquitination complex with Ubp3p that coregulates anterograde and retrograde transport between the endoplasmic reticulum and Golgi compartments; null is sensitive to brefeldin A	III	1.97932	1.54195	1.38759	-0.318069					IV		III	103.695	4.59938
YDL159W	STE7	Signal transducing MAP kinase kinase; involved in pheromone response where it phosphorylates Fus3p; involved in the pseudohyphal/invasive growth pathway where it phosphorylates of Kss1p; phosphorylated by Ste11p; degraded by ubiquitin pathway	III	2.58398	1.03763	0.252628	-0.016749	-0.842394	-1.30103	-2.30103				II	18.6516	0.827284
YOL005C	RPB11	RNA polymerase II subunit B12.5; part of central core; similar to Rpc19p and bacterial alpha subunit	III	2.59819	1.93523	1.61588	1.10042	0.658237	0.59504	0.177357					126.252	5.59985
YPR043W	RPL43A	Ribosomal 60S subunit protein L43A; null mutation confers a dominant lethal phenotype; homologous to mammalian ribosomal protein L37A, no bacterial homolog; RPL43A has a paralog, RPL43B, that arose from the whole genome duplication	III	2.26015	1.2832	0.407792	-0.041188	-0.379063	-0.511902	-1.52908	-2.30103				1234.22	54.7434
YDR238C	SEC26	Essential beta-coat protein of the COPI coatomer; involved in ER-to-Golgi protein trafficking and maintenance of normal ER morphology; shares 43% sequence identity with mammalian beta-coat protein (beta-COP)	III	3.97182	2.68248	1.47396	-0.201274	-0.584536	-0.584536	-0.584536	-0.584536		IV		203.175	9.01175
YHL023C	NPR3	Subunit of the Iml1p/SEACIT complex; SEACIT (Iml1p-Npr2p-Npr3p) is a subcomplex of SEAC, a coatomer-related complex that associates dynamically with the vacuole; Npr3p may have a structural or regulatory role, supporting Iml1p function as a GAP for the Rag family GTPase Gtr1p, and leading to inhibition of TORC1 signaling in response to amino acid deprivation; SEACIT is required for non-nitrogen-s…	III	2.93146	2.06121	1.31724	0.460966	-0.21511	-0.620909	-2.30103			IV	III	19.9168	0.883404
YJR007W	SUI2	Alpha subunit of the translation initiation factor eIF2; eIF2 is involved in identification of the start codon; phosphorylation of Ser51 is required for regulation of translation by inhibiting the exchange of GDP for GTP; protein abundance increases in response to DNA replication stress	III	3.5979	2.4406	0.847116	0.596211	0.054177	-0.25955	-0.25955	-1.71898	IV			407.662	18.0817
YGL147C	RPL9A	Ribosomal 60S subunit protein L9A; homologous to mammalian ribosomal protein L9 and bacterial L6; RPL9A has a paralog, RPL9B, that arose from a single-locus duplication	III	3.18722	1.67125	0.791824	0.311717	-0.445159	-1.84239	-1.84239				IV	2954.48	131.045
YKR065C	PAM17	Constituent of the TIM23 complex; proposed alternatively to be a component of the import motor (PAM complex) or to interact with and modulate the core TIM23 (Translocase of the Inner mitochondrial Membrane) complex; protein abundance increases in response to DNA replication stress	III	2.62813	1.7704	1.31653	0.886519	0.442155	0.281019			II		IV	88.7315	3.93566
YMR237W	BCH1	Member of the ChAPs family (Chs5p-Arf1p-binding proteins); members include Bch1p, Bch2p, Bud7p, and Chs6p; ChAPs family proteins form the exomer complex with Chs5p to mediate export of specific cargo proteins from the Golgi to the plasma membrane; may interact with ribosomes; protein abundance increases and forms cytoplasmic foci in response to DNA replication stress; BCH1 has a paralog, BUD7, th…	III	1.83324	1.4911	0.241043	-0.134019	-0.134019							88.1989	3.91203
YDR390C	UBA2	Subunit of heterodimeric nuclear SUMO activating enzyme E1 with Aos1p; activates Smt3p (SUMO) before its conjugation to proteins (sumoylation), which may play a role in protein targeting; essential for viability	III	1.38369	0.711487	0.571055	-0.25955	-0.25955							37.4753	1.6622
YJL121C	RPE1	D-ribulose-5-phosphate 3-epimerase; catalyzes a reaction in the non-oxidative part of the pentose-phosphate pathway; mutants are sensitive to oxidative stress	III	2.14603	1.72765	1.03179	-0.055403	-0.173995	-0.288513						205.378	9.10948
YPL097W	MSY1	Mitochondrial tyrosyl-tRNA synthetase	III	1.68993	0.252628	-0.478145	-1.39705	-1.39705	-1.39705	-1.39705	-1.39705	III			16.7355	0.742296
YDR405W	MRP20	Mitochondrial ribosomal protein of the large subunit	III	2.64355	1.55951	0.361933	-0.426563	-0.426563	-0.426563	-1.30103		II			24.2533	1.07575
YFR002W	NIC96	Linker nucleoporin component of the nuclear pore complex (NPC); also part of the NPC nuclear basket; contributes to nucleocytoplasmic transport and NPC biogenesis; forms stable associations with three FG-nucleoporins (Nsp1p, Nup57p, and Nup49p)	III	0.777922	0.292289	-1.18757	-1.46156	-1.46156	-1.75896	-1.75896	-2.13402				73.7538	3.27133
YOL042W	NGL1	Putative endonuclease; has a domain similar to a magnesium-dependent endonuclease motif in mRNA deadenylase Ccr4p; the authentic, non-tagged protein is detected in highly purified mitochondria in high-throughput studies	III	0.604112	0.241043	0.241043	-0.030724	-0.134019						III	27.896	1.23732
YJR148W	BAT2	Cytosolic branched-chain amino acid (BCAA) aminotransferase; preferentially involved in BCAA catabolism; homolog of murine ECA39; highly expressed during stationary phase and repressed during logarithmic phase; BAT2 has a paralog, BAT1, that arose from the whole genome duplication	III	2.22652	1.57165	1.28175	1.01828	1.01828	-0.055403	-0.273959	-0.397053				345.201	15.3113
YKL006W	RPL14A	Ribosomal 60S subunit protein L14A; N-terminally acetylated; homologous to mammalian ribosomal protein L14, no bacterial homolog; RPL14A has a paralog, RPL14B, that arose from the whole genome duplication	III	3.25621	2.29789	0.926739	-0.363571	-0.800073	-1.18757	-1.71898				II	219.98	9.75713
YDR487C	RIB3	3,4-dihydroxy-2-butanone-4-phosphate synthase (DHBP synthase); required for riboflavin biosynthesis from ribulose-5-phosphate, also has an unrelated function in mitochondrial respiration	III	2.97041	1.71311	0.777922	0.311717	-0.842394	-1.30103	-1.886	-3.88599	III		III	228.735	10.1455
YPR040W	TIP41	Protein that interacts with Tap42p, which regulates PP2A; component of the TOR (target of rapamycin) signaling pathway; protein abundance increases in response to DNA replication stress	III	3.17343	1.49661	0.407792	-0.494925	-0.658224	-1.05356	-2.24319	-2.80007	III			25.7916	1.14398
YBL090W	MRP21	Mitochondrial ribosomal protein of the small subunit; MRP21 exhibits genetic interactions with mutations in the COX2 and COX3 mRNA 5'-untranslated leader sequences	III	2.67257	1.34178	0.861345	0.425735	-1.07864	-1.886	-2.30103	-2.30103	II			54.4559	2.41537
YJL136C	RPS21B	Protein component of the small (40S) ribosomal subunit; homologous to mammalian ribosomal protein S21, no bacterial homolog; RPS21B has a paralog, RPS21A, that arose from the whole genome duplication	III	2.66748	2.04345	0.675555	0.675555	-0.257432	-0.257432	-1.30103	-1.30103			IV	780.486	34.6182
YIL076W	SEC28	Epsilon-COP subunit of the coatomer; regulates retrograde Golgi-to-ER protein traffic; stabilizes Cop1p, the alpha-COP and the coatomer complex; non-essential for cell growth; protein abundance increases in response to DNA replication stress	III	0.906769	0.055881	-0.171999	-0.286352	-0.71607	-1.07864	-1.30103	-2.30103	IV			170.401	7.55806
YJL190C	RPS22A	Protein component of the small (40S) ribosomal subunit; homologous to mammalian ribosomal protein S15A and bacterial S8; RPS22A has a paralog, RPS22B, that arose from the whole genome duplication	III	2.84927	1.7854	1.1947	1.06078	0.86037	0.674446	-2.80007		IV		IV	3780.26	167.672
YHR047C	AAP1	Arginine/alanine amino peptidase; overproduction stimulates glycogen accumulation; AAP1 has a paralog, APE2, that arose from the whole genome duplication	III	2.67819	1.56702							III		III	151.715	6.72927
YOR204W	DED1	ATP-dependent DEAD (Asp-Glu-Ala-Asp)-box RNA helicase; required for translation initiation of all yeast mRNAs; binds to mRNA cap-associated factors, and binding stimulates Ded1p RNA-dependent ATPase activity; mutation in human homolog DBY is associated with male infertility; human homolog DDX3X complements ded1 null mutation; DED1 has a paralog, DBP1, that arose from the whole genome duplication	III	2.56732	2.23342	1.32133	1.106	-0.348244	-1.05356	-2.24319	-2.88599		II		608.48	26.9889
YCL057C-A	MIC10	Conserved component of the MICOS complex; MICOS (formerly MINOS or MitOS) is a mitochondrial inner membrane complex that extends into the intermembrane space and has a role in the maintenance of crista junctions, inner membrane architecture, and formation of contact sites to the outer membrane; forms a subcomplex with Mic12p and Mic27p whose assembly and stability requires cardiolipin; homo-oligo…	III	1.15681	0.734328	-0.318069	-0.758957	-1.13402	-1.13402	-1.13402		III			84.2384	3.73637
YPR034W	ARP7	Component of both the SWI/SNF and RSC chromatin remodeling complexes; actin-related protein involved in transcriptional regulation	III	2.18869	1.71568	1.0064	-0.288513	-0.718981					IV		50.5846	2.24366
YNL252C	MRPL17	Mitochondrial ribosomal protein of the large subunit	III	1.78141	1.60017	1.60017	1.13436	0.892983	0.503827	0.433313	-0.018542	II			42.8921	1.90246
YIL009W	FAA3	Long chain fatty acyl-CoA synthetase; activates imported fatty acids; green fluorescent protein (GFP)-fusion protein localizes to the cell periphery	III	1.85425	0.914083	0.371222	-1.07864	-1.30103	-1.30103	-2.88599				III	58.5748	2.59807
YLR345W		Similar to 6-phosphofructo-2-kinase enzymes; mRNA expression is repressed by the Rfx1p-Tup1p-Ssn6p repressor complex; YLR345W is not an essential gene	III	1.29789	0.644113	0.580279	-0.21511	-0.98085	-1.42894	-1.71898					12.724	0.564368
YKR082W	NUP133	Subunit of Nup84p subcomplex of nuclear pore complex (NPC); contributes to nucleocytoplasmic transport, NPC biogenesis; is involved in establishment of a normal nucleocytoplasmic concentration gradient of GTPase Gsp1p; also plays roles in several processes that may require localization of genes or chromosomes at nuclear periphery, including double-strand break repair, transcription and chromatin …	III	1.88748	1.27754	0.712568	-0.22908	-1.75896							77.0388	3.41703
YLR268W	SEC22	R-SNARE protein; assembles into SNARE complex with Bet1p, Bos1p and Sed5p; cycles between the ER and Golgi complex; involved in anterograde and retrograde transport between the ER and Golgi; synaptobrevin homolog	III	3.71348	2.56821	1.49598	0.090038	-1.00468	-1.886	-1.886	-1.886		IV	IV	95.7313	4.24613
YGR186W	TFG1	TFIIF (Transcription Factor II) largest subunit; involved in both transcription initiation and elongation of RNA polymerase II; homologous to human RAP74	III	2.4718	1.58768	1.03092	0.596211	-0.080511	-1.02892	-1.02892	-1.02892				56.1232	2.48933
YPL143W	RPL33A	Ribosomal 60S subunit protein L33A; N-terminally acetylated; rpl33a null mutant exhibits slow growth while rpl33a rpl33b double null mutant is inviable; homologous to mammalian ribosomal protein L35A, no bacterial homolog; RPL33A has a paralog, RPL33B, that arose from the whole genome duplication	III	1.69047	0.478263	0.156018	-0.602608	-0.758957	-1.13402	-3.71898	-3.71898			II	1079.97	47.9018
YER050C	RSM18	Mitochondrial ribosomal protein of the small subunit; has similarity to E. coli S18 ribosomal protein	III	2.1096	2.0372	1.57627	1.23672	1.1947	1.01323	0.424416	-0.134019	II		III	86.0944	3.81869
YLR087C	CSF1	Protein required for fermentation at low temperature; plays a role in the maturation of secretory proteins; the authentic, non-tagged protein is detected in highly purified mitochondria in high-throughput studies	III	1.9063	1.01323	0.86037	0.805594	0.415464	-0.134019	-0.134019	-0.718981				24.7211	1.0965
YDL067C	COX9	Subunit VIIa of cytochrome c oxidase (Complex IV); Complex IV is the terminal member of the mitochondrial inner membrane electron transport chain	III	1.1234	0.704155	0.642979	0.359174								83.6623	3.71081
YNL290W	RFC3	Subunit of heteropentameric Replication factor C (RF-C); which is a DNA binding protein and ATPase that acts as a clamp loader of the proliferating cell nuclear antigen (PCNA) processivity factor for DNA polymerases delta and epsilon; relocalizes to the cytosol in response to hypoxia	III	3.16904	2.24179	1.83995	1.1179	-0.564067	-1.30103	-1.886	-2.88599				62.5207	2.77309
YJR133W	XPT1	Xanthine-guanine phosphoribosyl transferase; required for xanthine utilization and for optimal utilization of guanine	III	3.23035	1.8481	1.23238	0.675555	0.547877	-0.885995			III	III	II	72.3348	3.20839
YPR163C	TIF3	Translation initiation factor eIF-4B; contains an RNA recognition motif and binds to single-stranded RNA; has RNA annealing activity; interacts with Rps20p at the head of the 40S ribosomal subunit and alters the structure of the mRNA entry channel	III	2.95704	2.10207	1.07306	0.313143	-0.677249	-1.56407	-1.886	-2.30103			IV	525.961	23.3288
YIL053W	GPP1	Constitutively expressed DL-glycerol-3-phosphate phosphatase; also known as glycerol-1-phosphatase; involved in glycerol biosynthesis, induced in response to both anaerobic and osmotic stress; GPP1 has a paralog, GPP2, that arose from the whole genome duplication	III	3.15587	1.83374	1.2569	0.982355	0.230873	-1.18757	-1.42894	-1.42894				2101.39	93.2063
YDR404C	RPB7	RNA polymerase II subunit B16; forms dissociable heterodimer with Rpb4p; Rpb4/7 dissociates from RNAPII as Ser2 CTD phosphorylation increases; Rpb4/7 regulates cellular lifespan via mRNA decay process; involved in recruitment of 3'-end processing factors to transcribing RNA polymerase II complex, export of mRNA to cytoplasm under stress conditions; also involved in translation initiation	III	2.54522	1.78089	-0.160546	-0.566687							II	107.237	4.75648
YPR111W	DBF20	Ser/Thr kinase involved in late nuclear division; one of the mitotic exit network (MEN) proteins; necessary for the execution of cytokinesis; also plays a role in regulating the stability of SWI5 and CLB2 mRNAs; DBF20 has a paralog, DBF2, that arose from the whole genome duplication	III	1.4485	0.470919	0.398736	-0.529081	-1.27182	-1.84239	-2.88599					13.6583	0.605809
YGR208W	SER2	Phosphoserine phosphatase of the phosphoglycerate pathway; involved in serine and glycine biosynthesis, expression is regulated by the available nitrogen source	III	2.17244	1.61979	-0.564067	-0.564067	-0.564067						IV	103.129	4.57425
YGR257C	MTM1	Mitochondrial protein of the mitochondrial carrier family; high affinity pyridoxal 5'-phosphate (PLP) transporter, important for delivery of PLP cofactor to mitochondrial enzymes; involved in mitochondrial iron homeostasis and in activating mitochondrial Sod2p by facilitating insertion of an essential manganese cofactor	III	1.08921	0.783862	0.726041	0.59504					II			39.4682	1.7506
YNR035C	ARC35	Subunit of the ARP2/3 complex; ARP2/3 is required for the motility and integrity of cortical actin patches; required for cortical localization of calmodulin	III	2.46595	0.531398	0.293734	-0.171999	-0.171999	-0.546468						138.355	6.1367
YHR107C	CDC12	Component of the septin ring that is required for cytokinesis; septins are GTP-binding proteins that assemble into rod-like hetero-oligomers that can associate with other rods to form filaments; septin rings at the mother-bud neck act as scaffolds for recruiting cell division factors and as barriers to prevent diffusion of specific proteins between mother and daughter cells	III	2.41712	1.74614	1.02592	-0.106064	-0.602608	-1.18757	-1.75896	-3.88599				98.4891	4.36845
YKL081W	TEF4	Gamma subunit of translational elongation factor eEF1B; stimulates the binding of aminoacyl-tRNA (AA-tRNA) to ribosomes by releasing eEF1A (Tef1p/Tef2p) from the ribosomal complex	III	1.79974	0.713648	-0.271819	-0.842394	-1.27182	-1.27182	-1.27182	-2.88599			III	1450.69	64.3448
YIL148W	RPL40A	Ubiquitin-ribosomal 60S subunit protein L40A fusion protein; cleaved to yield ubiquitin and ribosomal protein L40A; ubiquitin may facilitate assembly of the ribosomal protein into ribosomes; homologous to mammalian ribosomal protein L40, no bacterial homolog; RPL40A has a paralog, RPL40B, that arose from the whole genome duplication; relative distribution to the nucleus increases upon DNA replica…	III	3.33621	2.24544	1.14683	0.341776	0.090038	-0.821078	-2.80007	-2.80007				1528.75	67.8072
YMR242C	RPL20A	Ribosomal 60S subunit protein L20A; homologous to mammalian ribosomal protein L18A, no bacterial homolog; RPL20A has a paralog, RPL20B, that arose from the whole genome duplication	III	2.11001	1.26763	0.055881	-1.07864	-1.56407	-1.886	-2.30103				IV	969.057	42.9822
YPL013C	MRPS16	Mitochondrial ribosomal protein of the small subunit	III	1.93302	1.78887	1.14603	0.681931	0.145228	-0.147222	-0.147222	-0.412911	I		III	61.3374	2.7206
YMR244C-A	COA6	Protein involved in cytochrome c oxidase (Complex IV) assembly; involved in delivery of copper to Complex IV; also required for efficient formation of respiratory supercomplexes comprised of Complexes III and IV; localizes to the mitochondrial intermembrane space; ortholog implicated in cardiac defects in zebrafish and human; transcription is induced in response to the DNA-damaging agent MMS; pro…	III	1.64028	1.02505	0.538442	0.538442	-0.658224	-2.71898			II			37.117	1.64631
YPR010C-A		Putative protein of unknown function; conserved among Saccharomyces sensu stricto species	III	1.70524	1.40712	0.452238	0.042595	-0.173995	-1.80007	-2.80007					30.0987	1.33502
YMR129W	POM152	Glycoprotein subunit of transmembrane ring of nuclear pore complex; contributes to nucleocytoplasmic transport, nuclear pore complex (NPC) biogenesis and spindle pole body duplication; homologous to human NUP210	III	1.43905	1.02505	0.486835	-1.00468	-1.46156	-2.13402	-2.13402					68.4575	3.03641
YKL096W-A	CWP2	Covalently linked cell wall mannoprotein; major constituent of the cell wall; plays a role in stabilizing the cell wall; involved in low pH resistance; precursor is GPI-anchored	III	1.35588	0.659359	-0.885995	-1.56407	-1.56407	-1.56407	-2.30103	-2.30103				3666.48	162.626
YDR177W	UBC1	Ubiquitin-conjugating enzyme; key E2 partner with Ubc4p for the anaphase-promoting complex (APC); mediates selective degradation of short-lived and abnormal proteins; plays a role in vesicle biogenesis and ER-associated protein degradation (ERAD); component of the cellular stress response; protein abundance increases in response to DNA replication stress key E2 partner with Ubc4p for the anaphase…	III	2.32444	1.95172	1.05011	-0.07864	-0.301032	-1.886	-2.30103		IV		IV	90.3484	4.00737
YKR067W	GPT2	Glycerol-3-phosphate/dihydroxyacetone phosphate sn-1 acyltransferase; located in lipid particles and the ER; involved in the stepwise acylation of glycerol-3-phosphate and dihydroxyacetone in lipid biosynthesis; the most conserved motifs and functionally relevant residues are oriented towards the ER lumen	III	2.09004	1.38437	0.840443	0.379091	-0.461558	-0.461558	-0.957405	-1.71898	III	IV	III	16.8853	0.748942
YJL159W	HSP150	O-mannosylated heat shock protein; secreted and covalently attached to the cell wall via beta-1,3-glucan and disulfide bridges; required for cell wall stability; induced by heat shock, oxidative stress, and nitrogen limitation; HSP150 has a paralog, PIR3, that arose from the whole genome duplication	III	3.23691	1.71257	0.893936	0.292289	0.101246	-1.24319	-2.18757	-2.18757				759.579	33.6909
YGR135W	PRE9	Alpha 3 subunit of the 20S proteasome; the only nonessential 20S subunit; may be replaced by the alpha 4 subunit (Pre6p) under stress conditions to create a more active proteasomal isoform	III	2.46161	1.95481	0.562971	0.340379	0.156018	0.156018	-0.030724	-0.030724				263.047	11.6674
YPR135W	CTF4	Chromatin-associated protein; required for sister chromatid cohesion; interacts with DNA polymerase alpha (Pol1p) and may link DNA synthesis to sister chromatid cohesion	III	2.79406	2.19509	1.32275	0.952637	0.613128	-0.885995						23.9682	1.0631
YAL033W	POP5	Subunit of both RNase MRP and nuclear RNase P; RNase MRP cleaves pre-rRNA, while nuclear RNase P cleaves tRNA precursors to generate mature 5' ends and facilitates turnover of nuclear RNAs	III	1.25765	0.232381	-1.00468	-1.00468	-1.46156	-1.80007	-1.80007	-2.71898				56.9949	2.52799
YKL058W	TOA2	TFIIA small subunit; involved in transcriptional activation, acts as antirepressor or as coactivator; required, along with Toa1p, for ribosomal protein gene transcription in vivo; homologous to smallest subunit of human and Drosophila TFIIA; protein abundance increases in response to DNA replication stress	III	2.02635	1.46659	0.22215	-0.410556	-0.410556	-1.52908	-1.52908	-1.886			II	99.8266	4.42778
TLC1	#N/A	#N/A	III	1.96451	0.834732	0.232381	-0.185555	-0.564067	-0.885995					IV	#N/A	#N/A
YOR198C	BFR1	Component of mRNP complexes associated with polyribosomes; involved in localization of mRNAs to P bodies; implicated in secretion and nuclear segregation; multicopy suppressor of BFA (Brefeldin A) sensitivity	III	1.0779	0.704155	0.495356	0.088373	-0.549056	-0.718981	-1.13402		III			348.101	15.4399
YPR093C	ASR1	Ubiquitin ligase that modifies and regulates RNA Pol II; involved in a putative alcohol-responsive signaling pathway; accumulates in the nucleus under alcohol stress; has a role in organization of septins and the actin cytoskeleton; contains a Ring/PHD finger domain similar to the mammalian rA9 protein	III	1.37909	1.22063	0.880026	-0.018542	-0.018542	-0.018542	-0.25955					6.07757	0.269569
YOR332W	VMA4	Subunit E of the V1 domain of the vacuolar H+-ATPase (V-ATPase); V-ATPase is an electrogenic proton pump found throughout the endomembrane system; V1 domain has eight subunits; required for the V1 domain to assemble onto the vacuolar membrane; protein abundance increases in response to DNA replication stress	III	3.10743	2.47276	0.675555	0.313143	-0.658224	-0.842394	-1.56407	-2.88599			IV	818.874	36.3209
YOR287C	RRP36	Component of 90S preribosomes; involved in early cleavages of the 35S pre-rRNA and in production of the 40S ribosomal subunit	IV	2.22907	1.06736	-0.426563	-1.30103	-1.30103							33.8304	1.50054
YLR115W	CFT2	Subunit of the mRNA cleavage and polyadenlylation factor (CPF); required for pre-mRNA cleavage, polyadenylation and poly(A) site recognition, 43% similarity with the mammalian CPSF-100 protein.	IV	3.5112	0.341776	-0.333078	-2.88599	-2.88599							30.5852	1.3566
YIL131C	FKH1	Forkhead family transcription factor; minor role in expression of G2/M phase genes; negatively regulates transcription elongation; positive role in chromatin silencing at HML, HMR; facilitates clustering and activation of early-firing replication origins; binds to recombination enhancer near HML, regulates donor preference during mating-type switching; relocalizes to cytosol in response to hypoxi…	IV	1.89441	0.728181	-0.145262	-1.46156	-3.71898	-3.71898					II	46.7625	2.07414
YBR036C	CSG2	Endoplasmic reticulum membrane protein; required for mannosylation of inositolphosphorylceramide and for growth at high calcium concentrations; protein abundance increases in response to DNA replication stress	IV	0.887477	-0.028917	-0.363571	-1.30103	-2.88599							112.184	4.97589
YOR058C	ASE1	Mitotic spindle midzone-localized microtubule bundling protein; microtubule-associated protein (MAP) family member; required for spindle elongation and stabilization; undergoes cell cycle-regulated degradation by anaphase promoting complex; potential Cdc28p substrate; relative distribution to microtubules decreases upon DNA replication stress	IV	1.91585	1.3545	0.963145	-1.39705	-1.71898						II	23.2876	1.03291
YBR130C	SHE3	Protein adaptor between Myo4p and the She2p-mRNA complex; part of the mRNA localization machinery that restricts accumulation of certain proteins to the bud; also required for cortical ER inheritance	IV	1.41546	0.538442	0.123405	-2.88599								71.5855	3.17515
YKL043W	PHD1	Transcriptional activator that enhances pseudohyphal growth; physically interacts with the Tup1-Cyc8 complex and recruits Tup1p to its targets; regulates expression of FLO11, an adhesin required for pseudohyphal filament formation; similar to StuA, an A. nidulans developmental regulator; potential Cdc28p substrate; PHD1 has a paralog, SOK2, that arose from the whole genome duplication	IV	2.14913	1.14061	0.51349	-0.257432	-1.886	-2.88599					I	28.1614	1.24909
YGL083W	SCY1	Putative kinase; suppressor of GTPase mutant; similar to bovine rhodopsin kinase; may have a role in intracellular sterol transport	IV	1.99443	0.762841	0.134358	-0.779369	-2.80007					IV	IV	21.8841	0.970663
YGL197W	MDS3	Putative component of the TOR regulatory pathway; negative regulator of early meiotic gene expression; required, with Pmd1p, for growth under alkaline conditions; has an N-terminal kelch-like domain; MDS3 has a paralog, PMD1, that arose from the whole genome duplication	IV	3.43064	1.89071	0.453532	-2.88599	-2.88599					IV		31.4728	1.39596
YDL143W	CCT4	Subunit of the cytosolic chaperonin Cct ring complex; related to Tcp1p, required for the assembly of actin and tubulins in vivo	IV	2.72838	0.134358	0.042595	-0.602608	-0.934334	-3.88599	-3.88599					236.781	10.5023
YFL010C	WWM1	WW domain containing protein of unknown function; binds to Mca1p, a caspase-related protease that regulates H2O2-induced apoptosis; overexpression causes G1 phase growth arrest and clonal death that is suppressed by overexpression of MCA1	IV	1.28175	0.969276	0.918553	-3.88599	-3.88599	-3.88599						138.863	6.15922
YOR315W	SFG1	Nuclear protein putative transcription factor; required for growth of superficial pseudohyphae (which do not invade the agar substrate) but not for invasive pseudohyphal growth; may act together with Phd1p; potential Cdc28p substrate	IV	1.27754	0.351196	-0.201274	-2.24319	-2.80007	-3.88599	-3.88599	-3.88599				97.3621	4.31847
YAR002C-A	ERP1	Member of the p24 family involved in ER to Golgi transport; role in misfolded protein quality control; forms heterotrimeric complex with Erp2p, Emp24p, and Erv25p; localized to COPII-coated vesicles; ERP1 has a paralog, ERP6, that arose from the whole genome duplication	IV	1.89394	0.572246	-0.106064	-1.84239	-2.88599	-3.88599	-3.88599				II	285.509	12.6636
YDL185W	VMA1	Subunit A of the V1 peripheral membrane domain of V-ATPase; protein precursor undergoes self-catalyzed splicing to yield the extein Tfp1p and the intein Vde (PI-SceI), which is a site-specific endonuclease; the V1 peripheral membrane domain of the vacuolar H+-ATPase (V-ATPase) has eight subunits; involved in methionine restriction extension of chronological lifespan in an autophagy-dependent mann…	IV	1.99532	1.37448	0.776889	-1.886	-1.886				IV			765.024	33.9324
YGL047W	ALG13	Catalytic component of UDP-GlcNAc transferase; required for the second step of dolichyl-linked oligosaccharide synthesis; anchored to the ER membrane via interaction with Alg14p; similar to bacterial and human glycosyltransferases; protein abundance increases in response to DNA replication stress	IV	1.60469	1.24179	0.271128	-3.88599	-3.88599							24.5652	1.08958
YER112W	LSM4	Lsm (Like Sm) protein; part of heteroheptameric complexes (Lsm2p-7p and either Lsm1p or 8p): cytoplasmic Lsm1p complex involved in mRNA decay; nuclear Lsm8p complex part of U6 snRNP and possibly involved in processing tRNA, snoRNA, and rRNA; forms cytoplasmic foci upon DNA replication stress	IV	1.98325	0.920425	-0.363571	-1.84239	-2.24319	-2.80007	-3.88599	-3.88599			IV	100.399	4.45316
YEL058W	PCM1	Essential N-acetylglucosamine-phosphate mutase; converts GlcNAc-6-P to GlcNAc-1-P, which is a precursor for the biosynthesis of chitin and for the formation of N-glycosylated mannoproteins and glycosylphosphatidylinositol anchors	IV	2.13244	1.24759	0.443458	-0.379063	-1.75896	-3.88599						90.6165	4.01926
YDL215C	GDH2	NAD(+)-dependent glutamate dehydrogenase; degrades glutamate to ammonia and alpha-ketoglutarate; expression sensitive to nitrogen catabolite repression and intracellular ammonia levels; genetically interacts with GDH3 by suppressing stress-induced apoptosis	IV	2.14873	0.887477	0.341776	-1.30103	-1.886	-2.88599						27.1247	1.20311
YJL162C	JJJ2	Protein of unknown function; contains a J-domain, which is a region with homology to the E. coli DnaJ protein	IV	0.983251	0.443458	-0.257432	-1.56407	-2.30103							15.9566	0.70775
YCR059C	YIH1	Negative regulator of eIF2 kinase Gcn2p; competes with Gcn2p for binding to Gcn1p; may contribute to regulation of translation in response to starvation via regulation of Gcn2p; binds to monomeric actin and to ribosomes and polyribosomes; ortholog of mammalian IMPACT	IV	1.60075	0.763884	0.51349	-1.05356	-1.27182	-1.84239	-3.88599	-3.88599				54.2727	2.40725
YDR370C	DXO1	mRNA 5'-end-capping quality-control protein; has distributive, 5'-3' exoRNase activity; similar to Rai1p;	IV	2.11749	0.866952	0.340379	-1.42894	-3.88599							34.2042	1.51712
YKR011C		Protein of unknown function; green fluorescent protein (GFP)-fusion protein localizes to the nucleus; protein abundance increases in response to DNA replication stress	IV	1.45288	0.425735	0.101246	-0.093231	-2.71898	-3.71898						18.0084	0.798756
YDL133C-A	RPL41B	Ribosomal 60S subunit protein L41B; comprises only 25 amino acids; rpl41a rpl41b double null mutant is viable; homologous to mammalian ribosomal protein L41, no bacterial homolog; RPL41B has a paralog, RPL41A, that arose from the whole genome duplication	IV	1.83709	0.505075	-0.445159	-1.21511	-2.88599	-2.88599	-3.88599					2340.89	103.829
YNL225C	CNM67	Component of the spindle pole body outer plaque; required for spindle orientation and mitotic nuclear migration; CNM67 has a paralog, ADY3, that arose from the whole genome duplication	IV	1.73072	1.39284	-0.639446	-2.71898							IV	18.5119	0.821089
YHR120W	MSH1	DNA-binding protein of the mitochondria; involved in repair of mitochondrial DNA; has ATPase activity and binds to DNA mismatches; has homology to E. coli MutS; transcription is induced during meiosis	IV	1.80952	1.19993	-1.00468	-2.18757	-3.71898	-3.71898	-3.71898			IV	III	20.7838	0.92186
YDR150W	NUM1	Protein required for nuclear migration; component of the mitochondria-ER-cortex-ancor (MECA); required for the association of mitochondria with the cell cortex and for accurate distribution of mitochondrial network; interacts with Mdm36p to link the ER and motochondria at the cortex; localizes to the mother cell cortex and the bud tip; may mediate interactions of dynein and cytoplasmic microtubul…	IV	1.39351	0.900367	0.791824	-0.564067	-2.30103	-2.30103						38.7783	1.72
YKL038W	RGT1	Glucose-responsive transcription factor; regulates expression of several glucose transporter (HXT) genes in response to glucose; binds to promoters and acts both as a transcriptional activator and repressor; recruits Tup1p/Cyc8p to target gene promoters; RGT1 has a paralog, EDS1, that arose from the whole genome duplication	IV	1.46161	0.853759	-0.363571	-1.30103							I	22.1839	0.983962
YCR052W	RSC6	Component of the RSC chromatin remodeling complex; essential for mitotic growth; RSC6 has a paralog, SNF12, that arose from the whole genome duplication	IV	1.52185	0.486835	-0.160546	-2.88599	-3.88599							73.9636	3.28063
YBR271W	EFM2	S-adenosylmethionine-dependent methyltransferase; seven-beta-strand lysine methyltransferase which dimethylates translation elongation factor EF2 (Eft1p and Eft2p) at lysine 613 and methylates EF3 (Yef3p) at lysine 187; green fluorescent protein (GFP)-fusion protein localizes to the cytoplasm; involved in regulation of translational termination; predicted involvement in ribosome biogenesis	IV	0.734328	0.230873	0.145228	-2.30103	-2.88599	-2.88599						50.0327	2.21918
YLR397C	AFG2	ATPase of the CDC48/PAS1/SEC18 (AAA) family, forms a hexameric complex; is essential for pre-60S maturation and release of several preribosome maturation factors; releases Rlp24p from purified pre-60S particles in vitro; target of the ribosomal biosynthesis inhibitor diazaborine; may be involved in degradation of aberrant mRNAs	IV	1.60863	0.564169	-0.639446	-1.56407								50.1364	2.22378
YJL063C	MRPL8	Mitochondrial ribosomal protein of the large subunit	IV	1.29717	0.360554	-0.271819	-0.394724	-2.18757	-2.71898			I			42.1419	1.86919
YDR341C		Arginyl-tRNA synthetase; the authentic, non-tagged protein is detected in highly purified mitochondria in high-throughput studies; YDR341C has a paralog, MSR1, that arose from the whole genome duplication	IV	2.21624	1.38895	-0.158568	-1.07864	-1.56407	-1.56407	-2.30103	-3.88599		IV	IV	344.397	15.2756
YHR009C	TDA3	Putative oxidoreductase involved in late endosome to Golgi transport; physical and genetical interactions with Btn2p; null mutant is viable, has extended S phase, and sensitive to expression of top1-T722A allele; similar to human FOXRED1	IV	1.1842	0.090038	-0.004683	-1.00468	-2.88599	-2.88599			III			116.703	5.17632
YDR229W	IVY1	Phospholipid-binding protein that interacts with both Ypt7p and Vps33p; may partially counteract the action of Vps33p and vice versa, localizes to the rim of the vacuole as cells approach stationary phase	IV	1.27754	0.627558	-0.173995	-0.428945	-3.71898							21.1202	0.93678
YOL115W	PAP2	Non-canonical poly(A) polymerase; involved in nuclear RNA degradation as a component of TRAMP; catalyzes polyadenylation of hypomodified tRNAs, and snoRNA and rRNA precursors; required for mRNA surveillance and maintenance of genome integrity, serving as a link between RNA and DNA metabolism; overlapping but non-redundant functions with Trf5p; relocalizes to cytosol in response to hypoxia	IV	1.29789	0.22215	-0.696529	-1.05356	-3.71898	-3.71898					IV	45.1966	2.00468
YPR114W		Putative protein of unknown function	IV	2.58198	1.92896	1.72658	-0.564067	-3.88599	-3.88599	-3.88599		IV			128.816	5.71357
YLR316C	TAD3	Subunit of tRNA-specific adenosine-34 deaminase; forms a heterodimer with Tad2p that converts adenosine to inosine at the wobble position of several tRNAs	IV	0.530173	0.134358	0.134358	-1.886	-2.88599	-2.88599	-2.88599	-3.88599				13.8461	0.614138
YGL219C	MDM34	Mitochondrial component of the ERMES complex; links the ER to mitochondria and may promote inter-organellar calcium and phospholipid exchange as well as coordinating mitochondrial DNA replication and growth; required for mitophagy; ERMES complex is often co-localized with peroxisomes and with concentrated areas of pyruvate dehydrogenase	IV	2.50022	1.13436	-0.885995									29.0831	1.28997
YPR181C	SEC23	GTPase-activating protein, stimulates the GTPase activity of Sar1p; component of the Sec23p-Sec24p heterodimer of the COPII vesicle coat, involved in ER to Golgi transport; substrate of Ubp3/Bre5 complex; ubiquitylated by Ub-ligase Rsp5p; proteasome-mediated degradation of Sec23p is regulated by Cdc48p	IV	0.964053	-0.119012	-1.00468	-1.21511	-1.21511							202.509	8.98221
YER023W	PRO3	Delta 1-pyrroline-5-carboxylate reductase; catalyzes the last step in proline biosynthesis	IV	1.05503	0.840443	0.351196	-2.88599	-3.88599	-3.88599	-3.88599	-3.88599			IV	313.601	13.9097
YGL153W	PEX14	Central component of the peroxisomal importomer complex; peroxisomal protein import machinery docking complex component; interacts with both PTS1 (Pex5p) and PTS2 (Pex7p) peroxisomal matrix protein signal recognition factors and membrane receptor Pex13p	IV	2.84354	1.45725	0.311717	-1.52908	-2.80007	-3.88599	-3.88599	-3.88599		IV	I	21.8903	0.970935
YOR086C	TCB1	Lipid-binding ER protein involved in ER-plasma membrane tethering; one of 6 proteins (Ist2p, Scs2p, Scs22p, Tcb1p, Tcb2p, Tcb3p) that connect ER to plasma membrane and regulate PI4P levels by controlling access of Sac1p phosphatase to its substrate PI4P in PM; contains 3 calcium and lipid binding domains; non-tagged protein also localizes to mitochondria; C-termini of Tcb1p, Tcb2p and Tcb3p inter…	IV	1.29301	0.398736	-0.041188	-2.30103	-3.88599	-3.88599						78.6282	3.48753
YOR196C	LIP5	Protein involved in biosynthesis of the coenzyme lipoic acid; has similarity to E. coli lipoic acid synthase	IV	0.827004	0.292289	-0.461558	-1.00468	-2.88599	-3.88599	-3.88599					40.6446	1.80278
YDL053C	PBP4	Pbp1p binding protein; interacts strongly with Pab1p-binding protein 1 (Pbp1p) in the yeast two-hybrid system; also interacts with Lsm12p in a copurification assay; relative distribution to the nucleus increases upon DNA replication stress	IV	3.16845	1.64355	0.313143	-1.56407	-2.30103	-3.88599	-3.88599		IV			79.5191	3.52704
YBR202W	MCM7	Component of the Mcm2-7 hexameric helicase complex; MCM2-7 primes origins of DNA replication in G1 and becomes an active ATP-dependent helicase that promotes DNA melting and elongation in S-phase; forms an Mcm4p-6p-7p subcomplex	IV	1.55544	0.452238	-0.842394	-2.24319	-2.24319	-2.24319	-3.88599				IV	49.2396	2.18401
YGL006W	PMC1	Vacuolar Ca2+ ATPase involved in depleting cytosol of Ca2+ ions; prevents growth inhibition by activation of calcineurin in the presence of elevated concentrations of calcium; similar to mammalian PMCA1a	IV	1.16752	0.78489	-0.620909	-0.800073	-2.24319	-3.71898	-3.71898					22.4654	0.996445
YGR142W	BTN2	v-SNARE binding protein; facilitates specific protein retrieval from a late endosome to the Golgi; modulates arginine uptake, possible role in mediating pH homeostasis between the vacuole and plasma membrane H(+)-ATPase; contributes to prion curing; BTN2 has a paralog, CUR1, that arose from the whole genome duplication	IV	1.88147	0.952637	0.252628	-0.957405	-1.39705							15.9726	0.708458
YNL098C	RAS2	GTP-binding protein; regulates nitrogen starvation response, sporulation, and filamentous growth; farnesylation and palmitoylation required for activity and localization to plasma membrane; homolog of mammalian Ras proto-oncogenes; RAS2 has a paralog, RAS1, that arose from the whole genome duplication	IV	1.80267	1.45224	-0.379063	-1.75896	-1.75896	-1.75896	-3.71898	-3.71898			II	119.5	5.30037
YNL147W	LSM7	Lsm (Like Sm) protein; part of heteroheptameric complexes (Lsm2p-7p and either Lsm1p or 8p): cytoplasmic Lsm1p complex involved in mRNA decay; nuclear Lsm8p complex part of U6 snRNP and possibly involved in processing tRNA, snoRNA, and rRNA; protein abundance increases and forms cytoplasmic foci in response to DNA replication stress	IV	1.77442	0.957901	0.388271	-2.30103							IV	87.6032	3.88561
YBR037C	SCO1	Copper-binding protein of mitochondrial inner membrane; required for cytochrome c oxidase activity and respiration; may function to deliver copper to cytochrome c oxidase; similar to thioredoxins; SCO1 has a paralog, SCO2, that arose from the whole genome duplication	IV	2.23813	1.2461	-1.56407						III			19.4964	0.864755
YGR147C	NAT2	Protein of unknown function; has an apparent role in acetylation of N-terminal methionine residues	IV	2.55076	1.19993	0.22215	-0.410556	-3.88599	-3.88599	-3.88599		II			70.0698	3.10792
YBR286W	APE3	Vacuolar aminopeptidase Y; processed to mature form by Prb1p	IV	3.17966	1.88376	1.15602	-1.49493	-2.24319	-2.80007	-2.80007				III	567.2	25.158
YCR071C	IMG2	Mitochondrial ribosomal protein of the large subunit; conserved in metazoa, with similarity to human mitochondrial ribosomal protein MRPL49	IV	1.23672	0.199927	-0.494925	-1.00468	-3.88599	-3.88599			II			36.2709	1.60878
YDL078C	MDH3	Peroxisomal malate dehydrogenase; catalyzes interconversion of malate and oxaloacetate; involved in the glyoxylate cycle	IV	2.19993	0.763884	-1.56407	-1.56407	-1.886	-2.30103	-2.30103				IV	127.697	5.66394
YOR250C	CLP1	Component of the cleavage and polyadenylation factor I (CF I); CF 1, composed of the CF 1A complex (Rna14p, Rna15p, Clp1p, Pcf11p) and Hrp1, is involved in cleavage and polyadenylation of mRNA 3' ends; involved in both the endonucleolyitc cleavage and polyadenylation steps of mRNA 3'-end maturation and in gene looping which affects reinitiation of transcription	IV	3.05252	1.55015	1.31582	-2.13402								27.7426	1.23051
YML018C		Protein of unknown function; green fluorescent protein (GFP)-fusion protein localizes to the membrane of the vacuole; physical interaction with Atg27p suggests a possible role in autophagy; YML018C is not an essential gene; relative distribution to the vacuolar membrane decreases upon DNA replication stress; YML018C has a paralog, THI74, that arose from the whole genome duplication	IV	1.28739	0.090038	-0.243186	-1.27182	-3.71898							98.5542	4.37134
YML097C	VPS9	Guanine nucleotide exchange factor (GEF); involved in vesicle-mediated vacuolar transport, including Golgi-endosome trafficking and sorting through the multivesicular body (MVB); specifically stimulates the intrinsic guanine nucleotide exchange activity of Rab family members (Vps21p/Ypt52p/Ypt53p); partially redundant with GEF MUK1; required for localization of the CORVET complex to endosomes; si…	IV	0.945517	0.210317	-0.511902	-1.84239								27.1829	1.20569
YHR215W	PHO12	One of three repressible acid phosphatases; glycoprotein that is transported to the cell surface by the secretory pathway; pregulated by phosphate starvation; PHO12 has a paralog, PHO11, that arose from a segmental duplication	IV	2.85945	1.68248	0.521855	-1.27182	-3.71898						III	16.3316	0.724384
YIR003W	AIM21	Protein of unknown function; involved in mitochondrial migration along actin filament; may interact with ribosomes; GFP-fusion protein colocalizes with Sac1p to the actin cytoskeleton	IV	1.81684	0.764927	-0.696529	-1.56407	-2.88599	-2.88599	-3.88599					30.387	1.34781
YDL145C	COP1	Alpha subunit of COPI vesicle coatomer complex; complex surrounds transport vesicles in the early secretory pathway	IV	0.951722	0.505075	0.112368	-1.56407	-2.30103	-2.30103	-2.30103			IV		254.577	11.2917
YDR477W	SNF1	AMP-activated serine/threonine protein kinase; found in a complex containing Snf4p and members of the Sip1p/Sip2p/Gal83p family; required for transcription of glucose-repressed genes, thermotolerance, sporulation, and peroxisome biogenesis; involved in regulation of the nucleocytoplasmic shuttling of Hxk2p; regulates filamentous growth in response to starvation; SUMOylation by Mms21p inhibits its…	IV	1.72295	1.41995	-1.49493	-2.24319	-3.71898	-3.71898						61.0482	2.70777
YMR178W		Protein of unknown function; green fluorescent protein (GFP)-fusion protein localizes to both the cytoplasm and nucleus; YMR178W is not an essential gene; protein abundance increases in response to DNA replication stress	IV	2.43462	0.698968	0.361933	-0.185555	-2.88599	-2.88599						62.6538	2.77899
YNL281W	HCH1	Heat shock protein regulator; binds to Hsp90p and may stimulate ATPase activity; originally identified as a high-copy number suppressor of a HSP90 loss-of-function mutation; role in regulating Hsp90 inhibitor drug sensitivity; GFP-fusion protein localizes to the cytoplasm and nucleus; protein abundance increases in response to DNA replication stress	IV	2.75859	1.90404	-0.426563	-2.30103	-2.88599	-2.88599	-2.88599		II		IV	247.249	10.9667
YKL135C	APL2	Beta-adaptin subunit of the clathrin-associated protein (AP-1) complex; binds clathrin; involved in clathrin-dependent Golgi protein sorting; protein abundance increases in response to DNA replication stress	IV	2.15063	1.86975	-0.348244	-1.71898	-1.71898							51.4815	2.28344
YGR031W	IMO32	Conserved mitochondrial protein of unknown function; processed by both mitochondrial processing peptidase and mitochondrial octapeptidyl aminopeptidase; gene contains the nested antisense gene NAG1	IV	0.873504	0.642979	0.503827	-1.49493								29.1323	1.29216
YPL019C	VTC3	Subunit of vacuolar transporter chaperone (VTC) complex; involved in membrane trafficking, vacuolar polyphosphate accumulation, microautophagy and non-autophagic vacuolar fusion; VTC3 has a paralog, VTC2, that arose from the whole genome duplication	IV	1.44721	0.61197	-0.080511	-0.911627								366.113	16.2388
YKL047W	ANR2	Putative protein of unknown function; may have a role in lipid metabolism, based on localization to lipid droplets; predicted to be palmitoylated	IV	1.95172	1.37909	0.880026	-3.88599	-3.88599							28.757	1.27551
YLR359W	ADE13	Adenylosuccinate lyase; catalyzes two steps in the 'de novo' purine nucleotide biosynthetic pathway; expression is repressed by adenine and activated by Bas1p and Pho2p; mutations in human ortholog ADSL cause adenylosuccinase deficiency; human ADSL can complement yeast ADE13 null mutant	IV	1.72711	1.29717	0.077064									241.775	10.7238
YJR083C	ACF4	Protein of unknown function; computational analysis of large-scale protein-protein interaction data suggests a possible role in actin cytoskeleton organization; potential Cdc28p substrate	IV	0.712568	0.369852	-0.067902								III	17.8908	0.793539
YPR144C	NOC4	Nucleolar protein; forms a complex with Nop14p that mediates maturation and nuclear export of 40S ribosomal subunits; relocalizes to the cytosol in response to hypoxia	IV	1.51706	0.112368	0.112368	-1.05356	-1.27182	-3.88599						84.0461	3.72784
YHR005C	GPA1	Subunit of the G protein involved in pheromone response; GTP-binding alpha subunit of the heterotrimeric G protein; negatively regulates the mating pathway by sequestering G(beta)gamma and by triggering an adaptive response; activates Vps34p at the endosome; protein abundance increases in response to DNA replication stress	IV	1.91361	1.12889	-0.21511	-2.88599	-3.88599	-3.88599						78.6013	3.48633
YBL021C	HAP3	Subunit of the Hap2p/3p/4p/5p CCAAT-binding complex; complex is heme-activated and glucose-repressed; complex is a transcriptional activator and global regulator of respiratory gene expression; contains sequences contributing to both complex assembly and DNA binding	IV	3.99582	2.41322	0.944597	-2.30103	-3.88599				IV		II	20.2658	0.898885
YDL135C	RDI1	Rho GDP dissociation inhibitor; involved in the localization and regulation of Cdc42p and Rho1p; protein abundance increases in response to DNA replication stress	IV	2.54111	1.12889	0.321334	-0.273959	-3.88599						III	124.672	5.52978
YNR018W	RCF2	Cytochrome c oxidase subunit; has a role in assembly of respiratory supercomplexes; similar to Rcf1p, and either Rcf1p or Rcf2p is required for late-stage assembly of the Cox12p and Cox13p subunits and for cytochrome c oxidase activity; associates with the cytochrome c oxidase - cytochrome bc1 supercomplex; null mutant accumulates reactive oxygen species; member of the conserved hypoxia induced g…	IV	1.52247	1.13516	0.51349	-0.934334	-3.88599	-3.88599	-3.88599	-3.88599				159.148	7.05898
YDR347W	MRP1	Mitochondrial ribosomal protein of the small subunit; MRP1 exhibits genetic interactions with PET122, encoding a COX3-specific translational activator, and with PET123, encoding a small subunit mitochondrial ribosomal protein	IV	1.8735	-0.004683	-0.620909	-1.16055	-1.39705				II		IV	69.4568	3.08073
YGL068W	MNP1	Mitochondrial ribosomal protein of the large subunit; has similarity to E. coli L7/L12 and human MRPL7 ribosomal proteins; associates with the mitochondrial nucleoid; required for normal respiratory growth	IV	1.96667	1.34038	-0.18757	-2.24319	-2.88599				I		IV	119.526	5.30155
YIL093C	RSM25	Mitochondrial ribosomal protein of the small subunit	IV	1.64411	0.989296	0.090038	-0.333078	-1.886				II			32.8579	1.4574
YPL117C	IDI1	Isopentenyl diphosphate:dimethylallyl diphosphate isomerase; catalyzes an essential activation step in the isoprenoid biosynthetic pathway; required for viability; isopentenyl diphosphate:dimethylallyl diphosphate isomerase is also known as IPP isomerase	IV	0.596211	0.302036	-1.07864	-1.07864	-2.30103	-2.30103						215.452	9.5563
YDR071C	PAA1	Polyamine acetyltransferase; acetylates polyamines (e.g. putrescine, spermidine, spermine) and also aralkylamines (e.g. tryptamine, phenylethylamine); may be involved in transcription and/or DNA replication	IV	1.42127	0.531398	-0.677249	-1.27182	-2.30103	-2.30103	-2.88599	-2.88599				259.714	11.5195
YMR305C	SCW10	Cell wall protein with similarity to glucanases; may play a role in conjugation during mating based on mutant phenotype and its regulation by Ste12p; SWC10 has a paralog, SCW4, that arose from the whole genome duplication	IV	1.97718	0.887477	0.388271	-1.886	-2.30103	-3.88599						334.682	14.8447
YPR182W	SMX3	Core Sm protein Sm F; part of heteroheptameric complex (with Smb1p, Smd1p, Smd2p, Smd3p, Sme1p, and Smx2p) that is part of the spliceosomal U1, U2, U4, and U5 snRNPs; homolog of human Sm F	IV	2.93367	0.341776	-0.132077	-0.363571	-2.80007	-3.88599	-3.88599				I	78.362	3.47572
YPR072W	NOT5	Subunit of CCR4-NOT global transcriptional regulator; involved intranscription initiation and elongation and in mRNA degradation; conserved lysine in human homolog of Not5p and Not3p is mutated in cancers	IV	2.17362	0.360554	0.189463	-2.24319	-2.88599	-2.88599	-2.88599	-3.88599			III	91.1741	4.044
YBR158W	AMN1	Protein required for daughter cell separation; multiple mitotic checkpoints, and chromosome stability; contains 12 degenerate leucine-rich repeat motifs; expression is induced by the Mitotic Exit Network (MEN)	IV	1.92265	0.241043	0.156018	0.065666	-2.24319	-2.88599					II	239.897	10.6406
YER115C	SPR6	Protein of unknown function; expressed during sporulation; not required for sporulation, but gene exhibits genetic interactions with other genes required for sporulation	IV	1.97932	1.15681	0.452238	-1.886	-1.886	-1.886	-2.88599					36.4104	1.61497
snR43	#N/A	#N/A	IV	2.13203	1.75629	1.04346	-0.564067	-2.30103							#N/A	#N/A
YDR356W	SPC110	Inner plaque spindle pole body (SPB) component; ortholog of human kendrin; involved in connecting nuclear microtubules to SPB; interacts with Tub4p-complex and calmodulin; phosphorylated by Mps1p in cell cycle-dependent manner	IV	2.15333	0.042595	-0.18757									24.275	1.07671
YER151C	UBP3	Ubiquitin-specific protease involved in transport and osmotic response; interacts with Bre5p to co-regulate anterograde and retrograde transport between the ER and Golgi; involved in transcription elongation in response to osmostress through phosphorylation at Ser695 by Hog1p; inhibitor of gene silencing; cleaves ubiquitin fusions but not polyubiquitin; also has mRNA binding activity; protein abu…	IV	0.651756	-0.055403	-0.758957	-1.71898	-1.71898	-2.13402						52.656	2.33554
YLR201C	COQ9	Protein required for ubiquinone biosynthesis and respiratory growth; localizes to the matrix face of the mitochondrial inner membrane in a large complex with ubiquinone biosynthetic enzymes; ubiquinone is also known as coenzyme Q	IV	2.59929	1.87629	1.469	-0.566687	-3.88599	-3.88599	-3.88599	-3.88599				39.1188	1.7351
YCL018W	LEU2	Beta-isopropylmalate dehydrogenase (IMDH); catalyzes the third step in the leucine biosynthesis pathway; can additionally catalyze the conversion of beta-ethylmalate into alpha-ketovalerate	IV	2.00131	0.87447	0.341776	-0.885995	-2.88599							0	0
YNL133C	FYV6	Protein of unknown function; required for survival upon exposure to K1 killer toxin; proposed to regulate double-strand break repair via non-homologous end-joining	IV	1.41546	1.08273	-0.738831	-0.911627								14.1697	0.628493
YDR167W	TAF10	Subunit (145 kDa) of TFIID and SAGA complexes; involved in RNA polymerase II transcription initiation and in chromatin modification	IV	1.09004	0.397392	0.397392									33.0521	1.46601
YNL135C	FPR1	Peptidyl-prolyl cis-trans isomerase (PPIase); binds to the drugs FK506 and rapamycin; also binds to the nonhistone chromatin binding protein Hmo1p and may regulate its assembly or function; N-terminally propionylated in vivo	IV	1.77792	0.989296	0.042595	-1.80007	-2.18757					IV		911.486	40.4287
YJL206C		Putative protein of unknown function; similar to transcriptional regulators from the Zn[2]-Cys[6] binuclear cluster protein family; mRNA is weakly cell cycle regulated, peaking in S phase; induced rapidly upon MMS treatment	IV	1.77092	1.31724	1.06078	-1.07864	-2.88599	-3.88599						9.25897	0.410679
YMR276W	DSK2	Nuclear-enriched ubiquitin-like polyubiquitin-binding protein; required for spindle pole body (SPB) duplication and for transit through the G2/M phase of the cell cycle; involved in proteolysis; interacts with the proteasome; protein abundance increases in response to DNA replication stress	IV	2.3659	0.675555	-0.016749	-1.07864						IV	IV	173.803	7.70897
YBR092C	PHO3	Constitutively expressed acid phosphatase similar to Pho5p; brought to the cell surface by transport vesicles; hydrolyzes thiamin phosphates in the periplasmic space, increasing cellular thiamin uptake; expression is repressed by thiamin	IV	1.13516	0.360554	-0.394724	-1.80007	-3.88599							139.192	6.17382
YGL198W	YIP4	Protein that interacts with Rab GTPases; localized to late Golgi vesicles; computational analysis of large-scale protein-protein interaction data suggests a possible role in vesicle-mediated transport	IV	1.44785	0.696785	0.424416	-3.88599	-3.88599	-3.88599	-3.88599				III	60.7046	2.69253
YLR108C		Protein of unknown function; green fluorescent protein (GFP)-fusion protein localizes to the nucleus; YLR108C is not an esssential gene; protein abundance increases in response to DNA replication stress; YLR108C has a paralog, YDR132C, that arose from the whole genome duplication	IV	1.99532	1.15602	1.06567	1.06567	-3.88599	-3.88599	-3.88599				III	19.6134	0.869948
YGR220C	MRPL9	Mitochondrial ribosomal protein of the large subunit	IV	2.79131	1.54256	0.642979	-2.30103					I			56.9087	2.52416
YDR415C		Putative aminopeptidase	IV	2.17057	1.46595	0.313143	-2.24319	-3.88599	-3.88599	-3.88599	-3.88599			II	25.6745	1.13878
YDR294C	DPL1	Dihydrosphingosine phosphate lyase; regulates intracellular levels of sphingolipid long-chain base phosphates (LCBPs), degrades phosphorylated long chain bases, prefers C16 dihydrosphingosine-l-phosphate as a substrate	IV	1.79131	0.712568	-0.288513	-0.288513	-1.18757	-2.88599	-3.88599	-3.88599				76.9228	3.41189
YFR013W	IOC3	Subunit of the Isw1a complex; Isw1a has nucleosome-stimulated ATPase activity and represses transcription initiation by specific positioning of a promoter proximal dinucleosome; promotes nucleosome shifts in the 5 prime direction; IOC3 has a paralog, ESC8, that arose from the whole genome duplication	IV	3.57954	2.06078	-0.004683	-1.75896	-2.71898					IV	II	42.7601	1.89661
YMR160W		Protein of unknown function; green fluorescent protein (GFP)-fusion protein localizes to the membrane of the vacuole; mutant has enhanced sensitivity to overexpression of mutant huntingtin; YMR160W is not an essential gene; relative distribution within the vacuolar membrane changes upon DNA replication stress	IV	0.777922	0.145228	-0.25955									10.2239	0.453476
YKR060W	UTP30	Putative subunit of U3-containing 90S preribosome complex; complex is involved in production of 18S rRNA and assembly of small ribosomal subunit	IV	1.81684	1.14141	0.952637	-0.301032	-3.88599						II	62.4792	2.77125
YAR015W	ADE1	N-succinyl-5-aminoimidazole-4-carboxamide ribotide synthetase; required for 'de novo' purine nucleotide biosynthesis; red pigment accumulates in mutant cells deprived of adenine; protein abundance increases in response to DNA replication stress	IV	1.65556	0.28393	-0.07864	-1.56407	-1.56407	-2.30103	-2.30103	-3.88599				130.85	5.8038
YML125C	PGA3	Putative cytochrome b5 reductase, localized to the plasma membrane; may be involved in regulation of lifespan; required for maturation of Gas1p and Pho8p, proposed to be involved in protein trafficking; PGA3 has a paralog, AIM33, that arose from the whole genome duplication	IV	2.18907	0.87447	-0.333078	-2.30103	-2.88599	-2.88599	-3.88599	-3.88599				264.189	11.718
YDR466W	PKH3	Protein kinase with similarity to mammalian PDK1 and yeast Pkh1p/Phk2p; yeast Pkh1p and Pkh2p are two redundant upstream activators of Pkc1p; identified as a multicopy suppressor of a pkh1 pkh2 double mutant	IV	1.57567	0.689377	0.619785	-2.30103	-3.88599						IV	20.8453	0.924586
YNL233W	BNI4	Targeting subunit for Glc7p protein phosphatase; localized to the bud neck, required for localization of chitin synthase III to the bud neck via interaction with the chitin synthase III regulatory subunit Skt5p	IV	0.681931	0.681931	0.177357									26.1747	1.16097
YGL171W	ROK1	RNA-dependent ATPase; involved in pre-rRNA processing at sites A0, A1, and A2, and in control of cell cycle progression; contains two upstream open reading frames (uORFs) in 5' untranslated region which regulate translation	IV	2.01026	1.31653	-1.56407	-2.30103	-2.30103	-2.88599						84.1151	3.7309
YHL033C	RPL8A	Ribosomal 60S subunit protein L8A; required for processing of 27SA3 pre-rRNA to 27SB pre-rRNA during assembly of large ribosomal subunit; depletion leads to a turnover of pre-rRNA; L8 binds to Domain I of 25S and 5.8 S rRNAs; mutation results in decreased amounts of free 60S subunits; homologous to mammalian ribosomal protein L7A, no bacterial homolog; RPL8A has a paralog, RPL8B, that arose from …	IV	3.10362	2.14603	-1.886	-1.886	-1.886	-2.30103	-2.30103	-2.88599	III		I	1171.3	51.9524
YOR354C	MSC6	Protein of unknown function; mutant is defective in directing meiotic recombination events to homologous chromatids; the authentic, non-tagged protein is detected in highly purified mitochondria in high-throughput studies	IV	1.07222	0.579094	0.368481						II			45.2002	2.00484
YMR304C-A		Dubious open reading frame; unlikely to encode a functional protein, based on available experimental and comparative sequence data; partially overlaps 3' end of verified ORF SCW10/YMR305C	IV	2.29473	0.361933	-0.564067	-2.88599	-2.88599	-2.88599	-2.88599	-2.88599			IV	119.924	5.31918
YLR121C	YPS3	Aspartic protease; member of the yapsin family of proteases involved in cell wall growth and maintenance; attached to the plasma membrane via a glycosylphosphatidylinositol (GPI) anchor	IV	0.681931	-0.243186	-1.05356	-1.52908	-2.30103							36.267	1.60861
YGL201C	MCM6	Protein involved in DNA replication; component of the Mcm2-7 hexameric helicase complex that binds chromatin as a part of the pre-replicative complex; forms a subcomplex with Mcm4p and Mcm7p	IV	2.72477	1.84946	0.166727	-0.134019	-2.71898	-2.71898					III	37.4931	1.663
YNL071W	LAT1	Dihydrolipoamide acetyltransferase component (E2) of the PDC; the pyruvate dehydrogenase complex (PDC) catalyzes the oxidative decarboxylation of pyruvate to acetyl-CoA	IV	2.16257	1.15223	0.479534	-0.677249	-1.84239	-1.84239	-2.80007	-3.71898	IV			291.293	12.9202
YGR253C	PUP2	Alpha 5 subunit of the 20S proteasome; involved in ubiquitin-dependent catabolism; human homolog is subunit zeta	IV	2.51108	1.75629	0.964053	-0.779369	-2.71898	-2.71898	-3.71898					236.351	10.4833
YJL055W		Putative protein of unknown function; functions together with HAM1 to mediate resistance to 5-FU; specifically reduces the incorporation of 5-FU into RNA, without affecting uptake or incorporation of uracil into RNA; proposed to be involved in the metabolism of purine and pyrimidine base analogues; deletion mutants are sensitive to HAP and AHA	IV	2.42061	1.88003	1.24104	-1.49493	-2.30103	-2.30103	-2.30103	-3.88599				115.039	5.10252
YDL136W	RPL35B	Ribosomal 60S subunit protein L35B; homologous to mammalian ribosomal protein L35 and bacterial L29; RPL35B has a paralog, RPL35A, that arose from the whole genome duplication	IV	1.75681	0.706327	-0.564067	-1.30103	-2.30103	-2.30103	-2.88599	-2.88599			IV	165.287	7.33125
YLL022C	HIF1	Non-essential component of the HAT-B histone acetyltransferase complex; localized to the nucleus; has a role in telomeric silencing; other members are Hat1p and Hat2p	IV	2.9966	0.28393	-0.185555	-1.886	-3.88599	-3.88599						45.8764	2.03483
YJR002W	MPP10	Component of the SSU processome and 90S preribosome; required for pre-18S rRNA processing, interacts with and controls the stability of Imp3p and Imp4p, essential for viability; similar to human Mpp10p	IV	1.74918	0.798726	0.007282	-2.24319	-3.88599							98.0205	4.34767
YKL186C	MTR2	mRNA transport regulator; essential nuclear protein; Mex67p and Mtr2p form a mRNA export complex which binds to RNA	IV	1.72711	1.23597	-0.658224	-1.00468	-1.00468	-3.88599	-3.88599			IV		76.0715	3.37412
YGL027C	CWH41	Processing alpha glucosidase I; ER type II integral membrane N-glycoprotein involved in assembly of cell wall beta 1,6 glucan and asparagine-linked protein glycosylation; also involved in ER protein quality control and sensing of ER stress	IV	1.25188	0.853759	-0.71607								IV	73.8427	3.27527
YMR199W	CLN1	G1 cyclin involved in regulation of the cell cycle; activates Cdc28p kinase to promote the G1 to S phase transition; late G1 specific expression depends on transcription factor complexes, MBF (Swi6p-Mbp1p) and SBF (Swi6p-Swi4p); CLN1 has a paralog, CLN2, that arose from the whole genome duplication	IV	0.77092	0.210317	-0.494925	-1.42894	-1.71898	-1.71898						49.3768	2.19009
YBR251W	MRPS5	Mitochondrial ribosomal protein of the small subunit	IV	1.68621	1.03677	0.424416	-1.71898	-2.13402	-2.13402	-2.13402	-2.13402	II			39.2333	1.74018
YLR055C	SPT8	Subunit of the SAGA transcriptional regulatory complex; not present in SAGA-like complex SLIK/SALSA; required for SAGA-mediated inhibition at some promoters	IV	1.9063	1.37841	-1.56407								II	18.0129	0.798958
YBR038W	CHS2	Chitin synthase II; catalyzes transfer of N-acetylglucosamine (GlcNAc) to chitin upon activation of zymogenic form; required for chitin synthesis in the primary septum during cytokinesis; localization regulated by Cdk1p during mitosis; phosphorylation by Dbf2p kinase regulates its dynamics and chitin synthesis during cytokinesis	IV	1.57627	0.705241	0.078742	-0.800073	-3.88599	-3.88599	-3.88599					33.8414	1.50103
YDL212W	SHR3	Endoplasmic reticulum packaging chaperone; required for incorporation of amino acid permeases into COPII coated vesicles for transport to the cell surface	IV	2.03806	0.888434	-0.426563	-1.886	-2.88599							271.298	12.0333
YNL059C	ARP5	Nuclear actin-related protein involved in chromatin remodeling; component of chromatin-remodeling enzyme complexes; promotes nucleosome shifts in the 3 prime direction	IV	1.04259	0.579094	0.359174	-0.018542	-3.71898	-3.71898					III	54.5681	2.42035
YLR386W	VAC14	Enzyme regulator; involved in synthesis of phosphatidylinositol 3,5-bisphosphate, in control of trafficking of some proteins to the vacuole lumen via the MVB, and in maintenance of vacuole size and acidity; binds negative (Fig4p) and positive (Fab1p) regulators of PtdIns(3,5)P(2) to control endolysosome function; similar to mammalian Vac14p	IV	2.0064	1.82551	1.52062	-3.88599	-3.88599							28.1319	1.24778
YPR183W	DPM1	Dolichol phosphate mannose (Dol-P-Man) synthase of the ER membrane; catalyzes the formation of Dol-P-Man from Dol-P and GDP-Man; required for glycosyl phosphatidylinositol membrane anchoring, O mannosylation, and protein glycosylation	IV	2.27011	1.76035	0.380452	-2.88599	-3.88599	-3.88599	-3.88599					178.093	7.89925
YMR228W	MTF1	Mitochondrial RNA polymerase specificity factor; has structural similarity to S-adenosylmethionine-dependent methyltransferases and functional similarity to bacterial sigma-factors; Mtf1p interacts with and stabilizes the Rpo41p-promoter complex, enhancing DNA bending and melting to facilitate pre-initiation open complex formation	IV	1.1842	0.211846	-1.07864	-1.886	-1.886	-2.88599			III			22.4939	0.997712
YGR004W	PEX31	Peroxisomal integral membrane protein; involved in negative regulation of peroxisome size; partially functionally redundant with Pex30p and Pex32p; probably acts at a step downstream of steps mediated by Pex28p and Pex29p; PEX31 has a paralog, PEX30, that arose from the whole genome duplication	IV	1.74918	0.887477	-0.394724	-2.18757	-3.88599	-3.88599						21.3994	0.949164
YLR328W	NMA1	Nicotinic acid mononucleotide adenylyltransferase; catalyzes the transfer of the adenylyl moiety of ATP to nicotinamide mononucleotide to form NAD; involved in pathways of NAD biosynthesis, including the de novo, NAD(+) salvage, and nicotinamide riboside salvage pathways; homolog of human NMNAT; NMA1 has a paralog, NMA2, that arose from the whole genome duplication	IV	1.93662	0.690474	-0.041188	-2.13402								68.4979	3.0382
YBR249C	ARO4	3-deoxy-D-arabino-heptulosonate-7-phosphate (DAHP) synthase; catalyzes the first step in aromatic amino acid biosynthesis and is feedback-inhibited by tyrosine or high concentrations of phenylalanine or tryptophan; relative distribution to the nucleus increases upon DNA replication stress	IV	2.20253	1.84329	0.088373	-3.71898							IV	409.814	18.1772
YER093C-A	AIM11	Protein of unknown function; null mutant is viable but shows increased loss of mitochondrial genome and synthetic interaction with prohibitin (phb1); contains an intron; YER093C-A has a paralog, YBL059W, that arose from the whole genome duplication	IV	1.09482	0.776889							II		III	12.2123	0.541671
YEL066W	HPA3	D-Amino acid N-acetyltransferase that detoxifies D-amino acids; catalyzes N-acetylation of D-amino acids through ordered bi-bi mechanism in which acetyl-CoA is first substrate bound and CoA is last product liberated; acetylates histones and polyamines, also autoacetylates	IV	1.47396	0.938361	-0.397053									40.6427	1.80269
YDL225W	SHS1	Component of the septin ring that is required for cytokinesis; septins are GTP-binding proteins that assemble into rod-like hetero-oligomers that can associate with other rods to form filaments; septin rings at the mother-bud neck act as scaffolds for recruiting cell division factors and as barriers to prevent diffusion of specific proteins; undergoes sumoylation and phosphorylation during mitosi…	IV	1.04925	-0.106064	-0.821078	-1.27182	-1.84239	-2.80007	-3.71898					52.8116	2.34244
YFL022C	FRS2	Alpha subunit of cytoplasmic phenylalanyl-tRNA synthetase; forms a tetramer with Frs1p to form active enzyme; evolutionarily distant from mitochondrial phenylalanyl-tRNA synthetase based on protein sequence, but substrate binding is similar	IV	1.96451	0.360554	-1.24319	-2.24319	-2.24319	-3.88599						306.336	13.5874
YLR303W	MET17	O-acetyl homoserine-O-acetyl serine sulfhydrylase; required for Methionine and cysteine biosynthesis	IV	2.62036	1.25263	0.636429	-2.30103	-3.88599	-3.88599	-3.88599			IV	I	241.197	10.6982
YHR057C	CPR2	Peptidyl-prolyl cis-trans isomerase (cyclophilin); catalyzes the cis-trans isomerization of peptide bonds N-terminal to proline residues; has a potential role in the secretory pathway; CPR2 has a paralog, CPR5, that arose from the whole genome duplication; suppresses toxicity of slow-folding human Z-type alpha1-antitrypsin variant associated with liver cirrhosis and emphysema	IV	2.28912	1.56297	1.0064	-0.397053	-3.71898	-3.71898						42.4957	1.88488
YJL193W		Putative protein of unknown function; predicted to encode a triose phosphate transporter subfamily member based on phylogenetic analysis; similar to YOR307C/SLY41; deletion mutant has a respiratory growth defect	IV	1.76336	0.97018	-0.093231	-1.46156	-3.71898	-3.71898						25.6461	1.13752
YMR236W	TAF9	Subunit (17 kDa) of TFIID and SAGA complexes; involved in RNA polymerase II transcription initiation and in chromatin modification, similar to histone H3	IV	1.29301	1.05011	0.675555	-2.30103					IV			105.524	4.6805
YKL127W	PGM1	Phosphoglucomutase, minor isoform; catalyzes the conversion from glucose-1-phosphate to glucose-6-phosphate, which is a key step in hexose metabolism; PGM1 has a paralog, PGM2, that arose from the whole genome duplication	IV	2.01915	0.416791	-0.658224	-1.00468	-3.88599	-3.88599					II	116.462	5.16565
YOL065C	INP54	Phosphatidylinositol 4,5-bisphosphate 5-phosphatase; role in secretion; localizes to the endoplasmic reticulum via the C-terminal tail; lacks the Sac1 domain and proline-rich region found in the other 3 INP proteins	IV	1.74561	0.539661	0.313143	-0.696529	-0.86403	-3.71898					III	17.9855	0.797739
YGR140W	CBF2	Essential kinetochore protein; component of the CBF3 multisubunit complex that binds to the CDEIII region of the centromere; Cbf2p also binds to the CDEII region possibly forming a different multimeric complex, ubiquitinated in vivo; sumoylated in an Mms21p-dependent manner; relative distribution to the spindle pole body decreases upon DNA replication stress	IV	2.81243	1.35519	-0.564067	-0.71607	-2.30103							20.3005	0.90042
YHR025W	THR1	Homoserine kinase; conserved protein required for threonine biosynthesis; long-lived protein that is preferentially retained in mother cells and forms cytoplasmic filaments; expression is regulated by the GCN4-mediated general amino acid control pathway	IV	2.6195	1.106	-1.21511	-1.75896	-2.18757						IV	305.177	13.536
YPR067W	ISA2	Protein required for maturation of mitochondrial [4Fe-4S] proteins; functions in a complex with Isa1p and possibly Iba57p; localizes to the mitochondrial intermembrane space, overexpression of ISA2 suppresses grx5 mutations	IV	2.09565	0.636429	-0.363571	-0.639446	-2.18757	-2.18757	-3.88599	-3.88599	II		III	44.3688	1.96796
YGL050W	TYW3	tRNA methyltransferase required for synthesis of wybutosine; a modified guanosine found at the 3'-position adjacent to the anticodon of phenylalanine tRNA which supports reading frame maintenance by stabilizing codon-anticodon interactions	IV	2.07548	1.30275	-0.333078	-1.80007							III	24.4134	1.08285
YGR056W	RSC1	Component of the RSC chromatin remodeling complex; required for expression of mid-late sporulation-specific genes; contains two essential bromodomains, a bromo-adjacent homology (BAH) domain, and an AT hook; RSC1 has a paralog, RSC2, that arose from the whole genome duplication	IV	3.13572	2.23342	0.873504	-2.88599	-3.88599						II	27.4895	1.21929
YMR288W	HSH155	U2-snRNP associated splicing factor; forms extensive associations with the branch site-3' splice site-3' exon region upon prespliceosome formation; similarity to the mammalian U2 snRNP-associated splicing factor SAP155	IV	2.50054	1.61704	0.821239	-1.52908	-2.88599	-3.88599	-3.88599				III	23.0207	1.02107
YBL058W	SHP1	UBX (ubiquitin regulatory X) domain-containing protein; regulates Glc7p phosphatase activity; shp1 mutants are impaired in growth and mitotic progression; functions in growth and mitotic progression require Cdc48p binding; mitotic phenotype is caused by reduced Glc7p activity; interacts with ubiquitylated proteins, required for degradation of a ubiquitylated model substrate	IV	1.72711	0.178922	-0.21511									126.215	5.59823
YNR012W	URK1	Uridine/cytidine kinase; component of the pyrimidine ribonucleotide salvage pathway that converts uridine into UMP and cytidine into CMP; involved in the pyrimidine deoxyribonucleotide salvage pathway, converting deoxycytidine into dCMP	IV	1.17814	-0.564067	-1.30103	-1.30103	-1.30103							56.1127	2.48886
YMR066W	SOV1	Mitochondrial protein of unknown function	IV	1.75274	1.38827	0.512249	-1.75896	-3.88599	-3.88599	-3.88599		III			11.2493	0.498958
YMR294W	JNM1	Component of the yeast dynactin complex; consisting of Nip100p, Jnm1p, and Arp1p; required for proper nuclear migration and spindle partitioning during mitotic anaphase B	IV	0.777922	-0.028917	-0.363571	-1.02892	-1.80007	-2.24319						11.6837	0.518226
YKL032C	IXR1	Transcriptional repressor that regulates hypoxic genes during normoxia; involved in the aerobic repression of genes such as COX5b, TIR1, and HEM13; binds DNA intrastrand cross-links formed by cisplatin; HMG (high mobility group box) domain containing protein which binds and bends cisplatin-modified DNA, blocking excision repair; IXR1 has a paralog, ABF2, that arose from the whole genome duplicati…	IV	2.49842	0.799743	0.055881	-0.426563	-2.88599						III	37.2471	1.65208
YGR079W		Putative protein of unknown function; YGR079W is not an essential gene	IV	2.23342	1.31653	0.424416	-1.21511	-1.49493	-1.84239	-3.71898				III	93.4081	4.14309
YDR023W	SES1	Cytosolic seryl-tRNA synthetase; class II aminoacyl-tRNA synthetase that aminoacylates tRNA(Ser), displays tRNA-dependent amino acid recognition which enhances discrimination of the serine substrate, interacts with peroxin Pex21p	IV	0.674446	0.478263	0.397392	-2.30103	-2.88599	-3.88599	-3.88599	-3.88599				767.039	34.0217
YGL003C	CDH1	Activator of anaphase-promoting complex/cyclosome (APC/C); cell-cycle regulated; directs ubiquitination of cyclins resulting in mitotic exit; targets the APC/C to specific substrates including Cdc20p, Ase1p, Cin8p and Fin1p	IV	3.07669	1.15761	0.706327	-0.171999	-2.88599	-3.88599					III	21.7917	0.966562
YNL247W		Cysteinyl-tRNA synthetase; may interact with ribosomes, based on co-purification experiments	IV	2.71986	1.94194	-0.348244	-1.24319							IV	187.145	8.30075
YMR283C	RIT1	Initiator methionine 2'-O-ribosyl phosphate transferase; modifies the initiator methionine tRNA at position 64 to distinguish it from elongator methionine tRNA	IV	3.22647	1.71514	-1.80007									19.1881	0.851081
YKL208W	CBT1	Protein involved in 5' RNA end processing; substrates include mitochondrial COB, 15S_rRNA, and RPM1 transcripts; may also have a role in 3' end processing of the COB pre-mRNA; displays genetic interaction with cell cycle-regulated kinase Dbf2p	IV	2.10723	0.597382	0.146829	-0.658224	-2.80007	-3.88599	-3.88599	-3.88599	IV			10.1416	0.449827
YDL045W-A	MRP10	Mitochondrial ribosomal protein of the small subunit; contains twin cysteine-x9-cysteine motifs; oxidized by Mia40p during import into mitochondria	IV	2.00938	0.145228	-0.25955	-0.397053	-2.13402	-3.71898			I		IV	77.0667	3.41827
YLR003C	CMS1	Putative subunit of the 90S preribosome processome complex; overexpression rescues supressor mutant of mcm10; null mutant is viable; relocalizes from nucleus to cytoplasm upon DNA replication stress	IV	1.1947	0.425735	-0.842394	-1.24319	-2.24319	-2.24319	-3.71898	-3.71898				111.548	4.94766
YAR018C	KIN3	Nonessential serine/threonine protein kinase; possible role in DNA damage response; influences tolerance to high levels of ethanol	IV	2.0718	0.538442	-0.318069	-1.39705	-1.39705							23.7485	1.05336
YJL134W	LCB3	Long-chain base-1-phosphate phosphatase; specific for dihydrosphingosine-1-phosphate, regulates ceramide and long-chain base phosphates levels, involved in incorporation of exogenous long chain bases in sphingolipids; LCB3 has a paralog, YSR3, that arose from the whole genome duplication	IV	2.47244	1.88376	0.24254	-1.07864	-2.88599	-3.88599	-3.88599	-3.88599			III	43.1103	1.91214
YMR139W	RIM11	Protein kinase; required for signal transduction during entry into meiosis; promotes the formation of the Ime1p-Ume6p complex by phosphorylating Ime1p and Ume6p; shares similarity with mammalian glycogen synthase kinase 3-beta; protein abundance increases in response to DNA replication stress; RIM11 has a paralog, MRK1, that arose from the whole genome duplication	IV	1.31172	0.964053	0.906769	-0.564067	-2.30103	-2.30103	-3.88599	-3.88599				26.6523	1.18215
YGL026C	TRP5	Tryptophan synthase; catalyzes the last step of tryptophan biosynthesis; regulated by the general control system of amino acid biosynthesis	IV	3.65158	2.47579	1.56702	-1.886	-2.88599	-3.88599	-3.88599	-3.88599				244.08	10.8261
YNL283C	WSC2	Sensor-transducer of the stress-activated PKC1-MPK1 signaling pathway; involved in maintenance of cell wall integrity and recovery from heat shock; required for the arrest of secretion response; WSC2 has a paralog, WSC3, that arose from the whole genome duplication	IV	2.77643	1.66048	-0.271819	-0.885995	-3.88599							48.5322	2.15263
YKL166C	TPK3	cAMP-dependent protein kinase catalytic subunit; promotes vegetative growth in response to nutrients via the Ras-cAMP signaling pathway; partially redundant with Tpk1p and Tpk2p; localizes to P-bodies during stationary phase; TPK3 has a paralog, TPK1, that arose from the whole genome duplication	IV	0.86037	0.330888	0.330888								I	30.8795	1.36965
YKR079C	TRZ1	tRNA 3'-end processing endonuclease tRNase Z; also localized to mitochondria and interacts genetically with Rex2 exonuclease; homolog of the human candidate prostate cancer susceptibility gene ELAC2	IV	1.5337	1.10042	-1.46156	-1.75896	-3.71898							46.3873	2.05749
YGR167W	CLC1	Clathrin light chain; subunit of the major coat protein involved in intracellular protein transport and endocytosis; regulates endocytic progression; thought to regulate clathrin function; the clathrin triskelion is a trimeric molecule composed of three heavy chains that radiate from a vertex and three light chains which bind noncovalently near the vertex of the triskelion	IV	1.5337	0.981458	-0.718981						IV			175.619	7.78952
YDR410C	STE14	Farnesyl cysteine-carboxyl methyltransferase; mediates the carboxyl methylation step during C-terminal CAAX motif processing of a-factor and RAS proteins in the endoplasmic reticulum, localizes to the ER membrane	IV	1.39806	0.763884	-0.584536	-0.934334	-1.75896	-2.13402	-2.13402	-2.71898				49.9291	2.21459
YMR302C	YME2	Integral inner mitochondrial membrane protein; role in maintaining mitochondrial nucleoid structure and number; mutants exhibit an increased rate of mitochondrial DNA escape; shows some sequence similarity to exonucleases	IV	1.99832	0.479534	0.252628	-2.30103	-3.88599	-3.88599			IV			29.5751	1.31179
YBR084C-A	RPL19A	Ribosomal 60S subunit protein L19A; rpl19a and rpl19b single null mutations result in slow growth, while the double null mutation is lethal; homologous to mammalian ribosomal protein L19, no bacterial homolog; RPL19A has a paralog, RPL19B, that arose from the whole genome duplication	IV	2.34885	1.43462	0.443458	-1.05356	-2.24319	-2.88599			IV		II	1318.39	58.4767
YOR001W	RRP6	Nuclear exosome exonuclease component; has 3'-5' exonuclease activity that is regulated by Lrp1p; involved in RNA processing, maturation, surveillance, degradation, tethering, and export; role in sn/snoRNAs precursor degradation; forms a stable heterodimer with Lrp1p; has similarity to E. coli RNase D and to human PM-Sc1 100 (EXOSC10); mutant displays reduced transcription elongation in the G-les…	IV	2.24104	1.45159	0.892983	-1.46156	-1.80007	-2.71898						90.5283	4.01535
YLR195C	NMT1	N-myristoyl transferase; catalyzes the cotranslational, covalent attachment of myristic acid to the N-terminal glycine residue of several proteins involved in cellular growth and signal transduction	IV	1.5183	0.698968	-0.301032	-2.30103	-3.88599	-3.88599	-3.88599	-3.88599				70.213	3.11427
YNL183C	NPR1	Protein kinase; stabilizes several plasma membrane amino acid transporters by antagonizing their ubiquitin-mediated degradation; phosphorylates Aly2p; negatively regulates Ldb19p-mediated endocytosis through phosphorylation of Ldb19p, which prevents its association with the plasma membrane; Npr1p activity is negatively regulated via phosphorylation by the TOR complex; NPR1 has a paralog, PRR2, th…	IV	2.61393	1.76336	-0.511902	-1.80007	-1.80007							14.5994	0.64755
YML094W	GIM5	Subunit of the heterohexameric cochaperone prefoldin complex; prefoldin binds specifically to cytosolic chaperonin and transfers target proteins to it; prefoldin complex also localizes to chromatin of actively transcribed genes in the nucleus and facilitates transcriptional elongation	IV	1.67764	0.007282	-0.333078	-0.602608	-2.30103							75.9488	3.36868
YOR122C	PFY1	Profilin; binds actin, phosphatidylinositol 4,5-bisphosphate, and polyproline regions; involved in cytoskeleton organization; required for normal timing of actin polymerization in response to thermal stress; protein abundance increases in response to DNA replication stress; highly conserved protein; human PFN1 (profilin 1) complements temperature sensitive pfy1 mutants, PFN1 mutations are a rare …	IV	1.89394	0.24254	-0.564067	-0.71607	-1.56407							358.347	15.8944
YOR143C	THI80	Thiamine pyrophosphokinase; phosphorylates thiamine to produce the coenzyme thiamine pyrophosphate (thiamine diphosphate)	IV	1.17892	0.712568	-0.738831									40.8329	1.81113
YNR029C		Putative protein of unknown function; deletion confers reduced fitness in saline	IV	1.97278	1.81533	1.63472	-3.88599								25.3823	1.12582
YOL057W		Dipeptidyl-peptidase III; cleaves dipeptides from the amino terminus of target proteins; highly active on synthetic substrate Arg-Arg-2-naphthylamide; mammalian ortholog may be a biomarker for some cancers	IV	2.29437	1.21032	-0.677249	-2.71898								71.2008	3.15809
YKL003C	MRP17	Mitochondrial ribosomal protein of the small subunit; MRP17 exhibits genetic interactions with PET122, encoding a COX3-specific translational activator	IV	2.64518	1.68193	-1.27182	-1.886	-1.886	-3.88599			I			54.5454	2.41934
YGR233C	PHO81	Cyclin-dependent kinase (CDK) inhibitor; regulates Pho80p-Pho85p and Pcl7p-Pho85p cyclin-CDK complexes in response to phosphate levels; inhibitory activity for Pho80p-Pho85p requires myo-D-inositol heptakisphosphate (IP7) generated by Vip1p; relative distribution to the nucleus increases upon DNA replication stress	IV	1.36985	0.704155	0.512249	-2.88599								51.2198	2.27184
YOR048C	RAT1	Nuclear 5' to 3' single-stranded RNA exonuclease; involved in RNA metabolism, including rRNA and snRNA processing as well as poly (A+) dependent and independent mRNA transcription termination; required for cotranscriptional pre-rRNA cleavage	IV	2.13203	0.713648	-1.49493	-2.30103	-2.30103	-2.30103	-2.88599					87.4766	3.88
YPL218W	SAR1	GTPase, GTP-binding protein of the ARF family; component of COPII coat of vesicles; required for transport vesicle formation during ER to Golgi protein transport; lowers membrane rigidity helping in vesicle formation	IV	2.68062	2.25691	1.79528	-2.30103	-3.88599	-3.88599					I	343.275	15.2259
YLR340W	RPP0	Conserved ribosomal protein P0 of the ribosomal stalk; involved in interaction between translational elongation factors and the ribosome; phosphorylated on serine 302; homologous to mammalian ribosomal protein LP0 and bacterial L10	IV	2.18946	0.913143	0.189463	-0.86403	-1.52908	-2.80007	-2.80007	-2.80007				4045.57	179.44
YGL196W	DSD1	D-serine dehydratase (aka D-serine ammonia-lyase); converts D-serine to pyruvate and ammonia by a reaction dependent on pyridoxal 5'-phosphate and zinc; may play a role in D-serine detoxification; L-serine is not a substrate	IV	1.86318	1.75169	0.790801	-3.88599							III	36.4431	1.61642
YER063W	THO1	Conserved nuclear RNA-binding protein; specifically binds to transcribed chromatin in a THO- and RNA-dependent manner, genetically interacts with shuttling hnRNP NAB2; overproduction suppresses transcriptional defect caused by hpr1 mutation	IV	1.80661	0.572246	-0.080511	-1.24319	-3.88599	-3.88599	-3.88599	-3.88599		IV	III	91.1512	4.04298
YOR131C		Putative haloacid dehalogenase-like hydrolase; non-essential gene; overexpression causes a cell cycle delay or arrest; protein abundance increases in response to DNA replication stress	IV	1.87773	1.09565	-0.394724	-1.05356	-1.84239	-1.84239	-1.84239	-3.71898	IV			41.1109	1.82346
YPL132W	COX11	Protein required for delivery of copper to Cox1p; mitochondrial inner membrane protein; association with mitochondrial ribosomes suggests that copper delivery may occur during translation of Cox1p	IV	2.94949	1.9321	-0.185555	-3.88599	-3.88599	-3.88599			II			23.6197	1.04764
YPL127C	HHO1	Histone H1, linker histone with roles in meiosis and sporulation; decreasing levels early in sporulation may promote meiosis, and increasing levels during sporulation facilitate compaction of spore chromatin; binds to promoters and within genes in mature spores; may be recruited by Ume6p to promoter regions, contributing to transcriptional repression outside of meiosis; suppresses DNA repair invo…	IV	2.09243	1.50022	0.232381	-0.842394	-2.18757						I	112.598	4.99423
YPR196W		Putative maltose-responsive transcription factor	IV	1.24104	1.11155	0.912203	-2.88599	-2.88599	-2.88599	-3.88599	-3.88599				6.57951	0.291832
YOL019W		Protein of unknown function; green fluorescent protein (GFP)-fusion protein localizes to the cell periphery and vacuole; YOL019W has a paralog, DCV1, that arose from the whole genome duplication	IV	2.26302	0.964961	-0.028917	-1.52908	-2.88599	-3.88599	-3.88599				III	38.6328	1.71354
YLR372W	ELO3	Elongase; involved in fatty acid and sphingolipid biosynthesis; synthesizes very long chain 20-26-carbon fatty acids from C18-CoA primers; involved in regulation of sphingolipid biosynthesis	IV	1.78141	0.460966	-0.22908	-1.21511	-2.71898	-2.71898	-2.71898	-2.71898				398.416	17.6716
YJL177W	RPL17B	Ribosomal 60S subunit protein L17B; homologous to mammalian ribosomal protein L17 and bacterial L22; RPL17B has a paralog, RPL17A, that arose from the whole genome duplication	IV	1.23672	1.00131	0.272595	-0.004683	-1.30103	-2.30103	-2.88599	-3.88599	IV			845.452	37.4997
YJR043C	POL32	Third subunit of DNA polymerase delta; involved in chromosomal DNA replication; required for error-prone DNA synthesis in the presence of DNA damage and processivity; forms a complex with Rev3p, Rev7p and Pol31p; interacts with Hys2p, PCNA (Pol30p), and Pol1p	IV	1.53905	0.272595	0.101246	-0.348244	-2.18757	-3.71898						35.6826	1.58269
YHL013C	OTU2	Protein of unknown function; may interact with ribosomes, based on co-purification experiments; member of the ovarian tumor-like (OTU) superfamily of predicted cysteine proteases; shows cytoplasmic localization; protein abundance increases in response to DNA replication stress	IV	1.7854	1.11237	0.554841	-2.13402	-2.13402							30.5518	1.35511
YDL061C	RPS29B	Protein component of the small (40S) ribosomal subunit; homologous to mammalian ribosomal protein S29 and bacterial S14; RPS29B has a paralog, RPS29A, that arose from the whole genome duplication	IV	1.69418	0.742568	0.067357	-1.27182	-2.88599	-2.88599	-3.88599				IV	1776.89	78.8134
YHR064C	SSZ1	Hsp70 protein that interacts with Zuo1p (a DnaJ homolog); interacts with Zuo1p to form a ribosome-associated complex that binds the ribosome via the Zuo1p subunit; also involved in pleiotropic drug resistance via sequential activation of PDR1 and PDR5; binds ATP	IV	2.64028	0.764927	0.444759	0.114005	-2.88599	-3.88599	-3.88599	-3.88599	IV			853.56	37.8594
YHR175W	CTR2	Putative low-affinity copper transporter of the vacuolar membrane; mutation confers resistance to toxic copper concentrations, while overexpression confers resistance to copper starvation; regulated by nonsense-mediated mRNA decay pathway	IV	2.17853	1.78089	1.56702	-1.84239	-2.80007	-3.88599						60.2984	2.67452
YNR049C	MSO1	Probable component of the secretory vesicle docking complex; acts at a late step in secretion; shows genetic and physical interactions with Sec1p; required for prospore membrane formation during sporulation; relocalizes from bud neck to nucleus upon DNA replication stress	IV	2.04593	1.62813	0.777922	-3.88599	-3.88599							31.1146	1.38008
YOR362C	PRE10	Alpha 7 subunit of the 20S proteasome; protein abundance increases in response to DNA replication stress	IV	3.26367	2.10558	2.05375	-1.84239	-3.88599	-3.88599	-3.88599					180.331	7.99854
YJR137C	MET5	Sulfite reductase beta subunit; involved in amino acid biosynthesis, transcription repressed by methionine	IV	1.0779	0.681931	0.01915	-0.584536	-1.42894	-2.18757	-2.71898					30.9035	1.37072
YER140W	EMP65	Integral membrane protein of the ER; forms an ER-membrane associated protein complex with Slp1p; identified along with SLP1 in a screen for mutants defective in the unfolded protein response (UPR); proposed to function in the folding of integral membrane proteins; interacts genetically with MPS3; the authentic, non-tagged protein is detected in highly purified mitochondria in high-throughput stud…	IV	1.5254	0.924875	-1.39705								II	18.4397	0.817886
YEL031W	SPF1	P-type ATPase, ion transporter of the ER membrane; required to maintain normal lipid composition of intracellular compartments and proper targeting of mitochondrial outer membrane tail-anchored proteins; involved in ER function and Ca2+ homeostasis; required for regulating Hmg2p degradation; confers sensitivity to a killer toxin (SMKT) produced by Pichia farinosa KK1	IV	0.666922	-0.119012	-0.800073	-1.18757	-1.42894	-1.75896	-3.88599				IV	276.195	12.2505
YOL061W	PRS5	5-phospho-ribosyl-1(alpha)-pyrophosphate synthetase; synthesizes PRPP, which is required for nucleotide, histidine, and tryptophan biosynthesis; one of five related enzymes, which are active as heteromultimeric complexes; forms cytoplasmic foci upon DNA replication stress	IV	2.52779	1.70837	0.97018	-1.30103	-2.88599	-2.88599			IV			146.715	6.50749
YDR272W	GLO2	Cytoplasmic glyoxalase II; catalyzes the hydrolysis of S-D-lactoylglutathione into glutathione and D-lactate; GLO2 has a paralog, GLO4, that arose from the whole genome duplication	IV	2.04388	1.01411	0.303471	-3.88599	-3.88599							49.6439	2.20194
YOR045W	TOM6	Component of the TOM (translocase of outer membrane) complex; responsible for recognition and initial import steps for all mitochondrially directed proteins; promotes assembly and stability of the TOM complex	IV	2.71932	1.25765	-0.379063	-0.696529	-1.84239	-2.80007			III			165.567	7.34365
YBR172C	SMY2	GYF domain protein; involved in COPII vesicle formation; interacts with the Sec23p/Sec24p subcomplex; overexpression suppresses the temperature sensitivity of a myo2 mutant; similar to S. pombe Mpd2; SMY2 has a paralog, SYH1, that arose from the whole genome duplication	IV	1.46531	0.689377	0.077064	-1.75896	-2.13402							60.9604	2.70388
YNL302C	RPS19B	Protein component of the small (40S) ribosomal subunit; required for assembly and maturation of pre-40 S particles; homologous to mammalian ribosomal protein S19, no bacterial homolog; mutations in human RPS19 are associated with Diamond Blackfan anemia; RPS19B has a paralog, RPS19A, that arose from the whole genome duplication	IV	2.19247	1.25839	0.055881	-0.86403	-1.84239	-3.88599	-3.88599	-3.88599				905.969	40.1839
YPR056W	TFB4	Subunit of TFIIH complex; involved in transcription initiation, similar to 34 kDa subunit of human TFIIH; interacts with Ssl1p	IV	2.12106	2.00131	1.54666	-1.49493	-2.18757							37.3175	1.65521
YMR011W	HXT2	High-affinity glucose transporter of the major facilitator superfamily; expression is induced by low levels of glucose and repressed by high levels of glucose	IV	2.75327	1.37054	0.435933	-1.56407							III	395.369	17.5365
YLR373C	VID22	Glycosylated integral membrane protein localized to plasma membrane; plays a role in fructose-1,6-bisphosphatase (FBPase) degradation; involved in FBPase transport from the cytosol to Vid (vacuole import and degradation) vesicles; VID22 has a paralog, ENV11, that arose from the whole genome duplication	IV	2.12696	1.27827	0.361933	-0.71607	-2.30103	-2.88599						20.7376	0.919811
YLR163C	MAS1	Beta subunit of the mitochondrial processing protease (MPP); essential processing enzyme that cleaves the N-terminal targeting sequences from mitochondrially imported proteins	IV	1.69363	1.3505	0.950806	-2.80007					II			55.4423	2.45913
YGL092W	NUP145	Essential protein with distinct roles in two nuclear pore subcomplexes; catalyzes its own proteolytic cleavage in vivo to generate a C-terminal fragment that is a structural component of the Nup84p subcomplex (with roles in NPC biogenesis and localization of genes to the nuclear periphery), and an N-terminal fragment that is one of several FG-nucleoporins within the NPC central core directly resp…	IV	1.29789	0.867923	-0.004683	-1.21511	-1.80007	-1.80007	-2.71898	-2.71898				87.1951	3.86751
YMR109W	MYO5	One of two type I myosin motors; contains proline-rich tail homology 2 (TH2) and SH3 domains; MYO5 deletion has little effect on growth, but myo3 myo5 double deletion causes severe defects in growth and actin cytoskeleton organization; MYO5 has a paralog, MYO3, that arose from the whole genome duplication	IV	2.56963	1.09482	0.241043	-1.80007	-3.71898						II	60.4537	2.6814
YDR375C	BCS1	Protein translocase and chaperone required for Complex III assembly; member of the AAA ATPase family; forms a homo-oligomeric complex in the mitochondrial inner membrane that translocates the C-terminal domain of Rip1p from the matrix across the inner membrane, and then delivers it to an assembly intermediate of respiratory Complex III in an ATP-dependent reaction; also required for assembly of t…	IV	2.30446	1.23087	0.925807	0.442155	-3.88599	-3.88599			II			26.584	1.17912
YMR023C	MSS1	Mitochondrial protein; forms a heterodimer complex with Mto1p that performs the 5-carboxymethylaminomethyl modification of the wobble uridine base in mitochondrial tRNAs; similar to human GTPBP3	IV	1.7338	1.30617	0.733264	0.733264	-3.88599	-3.88599	-3.88599		II			7.51523	0.333336
YBR095C	RXT2	Component of the histone deacetylase Rpd3L complex; possibly involved in cell fusion and invasive growth; relocalizes to the cytosol in response to hypoxia	IV	1.03092	0.538442	-0.461558	-1.00468	-1.52908							32.5046	1.44173
YPL111W	CAR1	Arginase, catabolizes arginine to ornithine and urea; expression responds to both induction by arginine and nitrogen catabolite repression; disruption decreases production of carcinogen ethyl carbamate during wine fermentation and also enhances freeze tolerance	IV	2.17853	0.406457	0.156018	-2.30103								85.9877	3.81396
YER012W	PRE1	Beta 4 subunit of the 20S proteasome; localizes to the nucleus throughout the cell cycle	IV	0.666922	-0.478145	-0.478145	-0.620909	-2.30103	-3.88599	-3.88599				II	262.704	11.6522
YMR038C	CCS1	Copper chaperone for superoxide dismutase Sod1p; involved in oxidative stress protection; Met-X-Cys-X2-Cys motif within the N-terminal portion is involved in insertion of copper into Sod1p under conditions of copper deprivation; required for regulation of yeast copper genes in response to DNA-damaging agents; protein abundance increases in response to DNA replication stress	IV	2.1883	1.8962	-0.379063	-2.18757	-3.88599	-3.88599						193.771	8.59465
YER168C	CCA1	ATP (CTP):tRNA-specific tRNA nucleotidyltransferase; different forms targeted to the nucleus, cytosol, and mitochondrion are generated via the use of multiple transcriptional and translational start sites; human homolog TRNT1 complements yeast null mutant	IV	1.1234	0.826005	0.826005	0.123405	-3.88599	-3.88599	-3.88599	-3.88599				48.406	2.14703
YDL158C		Dubious open reading frame; unlikely to encode a functional protein, based on available experimental and comparative sequence data	IV	1.85805	0.764927	0.645245	-1.07864								48.6651	2.15852
YNL102W	POL1	Catalytic subunit of the DNA polymerase I alpha-primase complex; required for the initiation of DNA replication during mitotic DNA synthesis and premeiotic DNA synthesis	IV	2.61001	1.07222	-0.71607	-0.885995	-1.30103							46.1583	2.04734
YNR043W	MVD1	Mevalonate pyrophosphate decarboxylase; essential enzyme involved in the biosynthesis of isoprenoids and sterols, including ergosterol; acts as a homodimer	IV	2.42218	1.60746	-0.566687	-3.88599							III	206.987	9.18085
YJL087C	TRL1	tRNA ligase; required for tRNA splicing and for both splicing and translation of HAC1 mRNA in the UPR; has phosphodiesterase, polynucleotide kinase, and ligase activities; localized at the inner nuclear envelope and partially to polysomes	IV	1.2569	1.01323	0.619785	-0.173995	-3.88599							34.1986	1.51687
YDR297W	SUR2	Sphinganine C4-hydroxylase; catalyses the conversion of sphinganine to phytosphingosine in sphingolipid biosyntheis	IV	2.17814	0.827004	-0.303215	-1.21511							II	109.931	4.87595
YJL167W	ERG20	Farnesyl pyrophosphate synthetase; has both dimethylallyltranstransferase and geranyltranstransferase activities; catalyzes the formation of C15 farnesyl pyrophosphate units for isoprenoid and sterol biosynthesis	IV	2.28739	1.55544	-0.271819	-1.80007								375.737	16.6657
YBR282W	MRPL27	Mitochondrial ribosomal protein of the large subunit; homolog of human Bcl-2 interacting protein BMRP	IV	2.3458	1.84712	0.690474	-0.410556	-3.88599				I			39.3967	1.74743
YGL115W	SNF4	Activating gamma subunit of the AMP-activated Snf1p kinase complex; additional subunits of the complex are Snf1p and a Sip1p/Sip2p/Gal83p family member; activates glucose-repressed genes, represses glucose-induced genes; role in sporulation, and peroxisome biogenesis; protein abundance increases in response to DNA replication stress	IV	2.53048	0.311717	-1.52908	-1.52908	-1.886	-3.88599						102.044	4.52614
YBL037W	APL3	Alpha-adaptin; large subunit of the clathrin associated protein complex (AP-2); involved in vesicle mediated transport	IV	1.47826	0.199927	-0.303215	-2.88599								25.2342	1.11925
YBR078W	ECM33	GPI-anchored protein of unknown function; possible role in apical bud growth; GPI-anchoring on the plasma membrane crucial to function; phosphorylated in mitochondria; similar to Sps2p; ECM33 has a paralog, PST1, that arose from the whole genome duplication	IV	0.596211	-0.333078	-1.46156	-1.46156	-1.46156	-1.46156	-2.88599	-3.88599			III	781.612	34.6681
YNL288W	CAF40	Component of the CCR4-NOT transcriptional complex; evolutionarily conserved; involved in controlling mRNA initiation, elongation, and degradation; binds Cdc39p	IV	2.67041	1.51768	-0.394724	-2.88599	-3.88599						IV	44.4147	1.97
YLR067C	PET309	Specific translational activator for the COX1 mRNA; binds to the COX1 mRNA; also influences stability of intron-containing COX1 primary transcripts; localizes to the mitochondrial inner membrane; contains 12 pentatricopeptide repeats (PPRs)	IV	1.32612	1.32612	-0.71607	-0.885995					III			16.6198	0.737165
YKR078W		Cytoplasmic protein of unknown function; potential Cdc28p substrate; contains a Phox homology (PX) domain and specifically binds phosphatidylinositol 3-phosphate (PtdIns-3-P); YKR078W has a paralog, VPS5, that arose from the whole genome duplication	IV	1.06078	0.689377	0.619785	-0.934334	-3.71898							13.8556	0.614562
YKL206C	ADD66	Protein involved in 20S proteasome assembly; forms a heterodimer with Pba1p that binds to proteasome precursors; interaction with Pba1p-Add66p may affect function of the mature proteasome and its role in maintaining respiratory metabolism; similar to human PAC2 constituent of the PAC1-PAC2 complex involved in proteasome assembly	IV	1.39284	0.503827	0.424416									47.2948	2.09775
YGR019W	UGA1	Gamma-aminobutyrate (GABA) transaminase; also known as 4-aminobutyrate aminotransferase; involved in the 4-aminobutyrate and glutamate degradation pathways; required for normal oxidative stress tolerance and nitrogen utilization; protein abundance increases in response to DNA replication stress	IV	2.81634	1.68248	0.199927	-1.27182	-2.88599							28.9905	1.28587
YML052W	SUR7	Plasma membrane protein, component of eisosomes; long-lived protein that remains stable in eisosomes of mother cells while other eisosome proteins, Pil1p and Lsp1p, turn over; may function to anchor the eisosome in place; sporulation and plasma membrane sphingolipid content are altered in mutants; localizes to furrow-like invaginations (MCC patches)	IV	1.14061	0.189463	-0.494925	-1.84239	-2.24319	-2.80007	-3.88599	-3.88599			III	112.961	5.01035
YGL107C	RMD9	Mitochondrial protein required for respiratory growth; mutant phenotype and genetic interactions suggest a role in delivering mt mRNAs to ribosomes; located on matrix face of the inner membrane and loosely associated with mitoribosomes; RMD9 has a paralog, YBR238C, that arose from the whole genome duplication	IV	2.56154	2.04259	1.0779	-0.885995	-2.88599	-2.88599	-3.88599		III			34.2513	1.5192
[truncated: 199 more rows]
