# Supplementary material
Source: HighWire-hosted journal article supplement (doi:10.1101/rna.062687.117)
Supplement: Supplemental_Data_6_PUF5-KO4.xlsx [file Supplemental_Data_6_PUF5-KO4.xlsx]

## Sheet: Key
Column header	Description
PUF4-koPUF5 target	Systematic name of Puf5p;KOpuf4 target gene
Name	Name of Puf5p;KOpuf4 target
Description	Gene description
Class	Puf5p;KOpuf4 target class for this gene
Mean TRPM U1 (log2)	Mean number of TRPM detected with at least 1 U in the Utag
Mean TRPM U2 (log2)	Mean number of TRPM detected with at least 2 U's in the Utag
Mean TRPM U3 (log2)	Mean number of TRPM detected with at least 3 U's in the Utag
Mean TRPM U4 (log2)	Mean number of TRPM detected with at least 4 U's in the Utag
Mean TRPM U5 (log2)	Mean number of TRPM detected with at least 5 U's in the Utag
Mean TRPM U6 (log2)	Mean number of TRPM detected with at least 6 U's in the Utag
Mean TRPM U7 (log2)	Mean number of TRPM detected with at least 7 U's in the Utag
Mean TRPM U8 (log2)	Mean number of TRPM detected with at least 8 U's in the Utag
Puf3p Target Class	Class of this target in the Puf3p data set
Puf4p Target class	Class of this target in the Puf4p data set
Puf5p Target class	Class of this target in the Puf5p data set
RNAseq mean FPKM	Mean FPKM value from RNAseq data of BY4742 yeast strain, mined from Lapointe et al. 2015
Estimated mRNA molecules per cell	Number of estimated mRNA molecules per cell, based off RNAseq (FPKM) and an estimated 36,000 total mRNAs per cell

## Sheet: Puf5p;KOpuf4 Targets
Puf5p;KOpuf4 Target	Name	Description	Class	Mean TRPM U1 (log2)	Mean TRPM U2 (log2)	Mean TRPM U3 (log2)	Mean TRPM U4 (log2)	Mean TRPM U5 (log2)	Mean TRPM U6 (log2)	Mean TRPM U7 (log2)	Mean TRPM U8 (log2)	Puf3p Target Class	Puf4p Target class	Puf5p Target class	RNAseq mean FPKM	Estimated mRNA molecules per cell
YPR052C	NHP6A	High-mobility group (HMG) protein; binds to and remodels nucleosomes; involved in recruiting FACT and other chromatin remodelling complexes to chromosomes; functionally redundant with Nhp6Bp; required for transcriptional initiation fidelity of some tRNA genes; homologous to mammalian HMGB1 and HMGB2; NHP6A has a paralog, NHP6B, that arose from the whole genome duplication; protein abundance incre…	I	7.10327	6.75291	6.34956	5.72382	5.05027	4.10785	2.78591	1.01304			I	154.414	6.84896
YDR016C	DAD1	Essential subunit of the Dam1 complex (aka DASH complex); complex couples kinetochores to the force produced by MT depolymerization thereby aiding in chromosome segregation; is transferred to the kinetochore prior to mitosis	I	8.61119	8.14421	7.62212	7.07338	6.32761	5.41198	3.9436	1.66056		IV	I	46.6467	2.069
YAL003W	EFB1	Translation elongation factor 1 beta; stimulates nucleotide exchange to regenerate EF-1 alpha-GTP for the next elongation cycle; part of the EF-1 complex, which facilitates binding of aminoacyl-tRNA to the ribosomal A site	I	9.43261	8.49942	7.87085	7.13612	6.1574	4.98857	3.26227	1.14622			I	1732.6	76.8488
YPR053C		Dubious open reading frame; unlikely to encode a functional protein, based on available experimental and comparative sequence data; partially overlaps verified gene NHP6A/YPR052C	I	7.70817	7.36539	6.93726	6.35234	5.82803	4.72983	2.88494	0.999323		IV	I	5.71642	0.25355
YML022W	APT1	Adenine phosphoribosyltransferase; catalyzes the formation of AMP from adenine and 5-phosphoribosylpyrophosphate; involved in the salvage pathway of purine nucleotide biosynthesis; APT1 has a paralog, APT2, that arose from the whole genome duplication	I	9.40788	8.67692	7.89641	6.84424	5.81134	4.23634	2.04462	-1.59737		I	I	303.576	13.465
YDR201W	SPC19	Essential subunit of the Dam1 complex (aka DASH complex); complex couples kinetochores to the force produced by MT depolymerization thereby aiding in chromosome segregation; also localized to nuclear side of spindle pole body	I	8.65339	8.23607	7.66788	6.99832	5.98418	4.50964	2.21844	-0.363116	IV	III	I	28.5783	1.26758
YNL301C	RPL18B	Ribosomal 60S subunit protein L18B; homologous to mammalian ribosomal protein L18, no bacterial homolog; RPL18B has a paralog, RPL18A, that arose from the whole genome duplication	I	8.98287	8.0351	7.06998	6.20788	5.16634	3.40418	1.72456	0.889674	III	I	I	163.203	7.23879
YER058W	PET117	Protein required for assembly of cytochrome c oxidase	I	7.62073	7.12702	6.7738	6.3002	5.81174	5.03465	4.22744	2.95424	II		I	11.4322	0.507074
YBR034C	HMT1	Nuclear SAM-dependent mono- and asymmetric methyltransferase; modifies hnRNPs, including Npl3p and Hrp1p, affecting their activity and nuclear export; methylates U1 snRNP protein Snp1p, ribosomal protein Rps2p, and histones H3 and H4; interacts genetically with genes encoding components of Rpd3(L) and this interaction is important for Rpd3 recruitment to the subtelomeric region.	I	9.29253	8.55282	7.80748	6.95723	6.02636	4.93771	2.34221	-0.000677	III	I	I	287.154	12.7366
YBR010W	HHT1	Histone H3; core histone protein required for chromatin assembly, part of heterochromatin-mediated telomeric and HM silencing; one of two identical histone H3 proteins (see HHT2); regulated by acetylation, methylation, and phosphorylation; H3K14 acetylation plays an important role in the unfolding of strongly positioned nucleosomes during repair of UV damage	I	8.42428	8.13013	7.82697	7.38077	6.83948	5.97456	4.69389	2.98311		I	I	1023.51	45.3975
YGL103W	RPL28	Ribosomal 60S subunit protein L28; homologous to mammalian ribosomal protein L27A and bacterial L15; may have peptidyl transferase activity; can mutate to cycloheximide resistance	I	12.6434	11.368	10.238	8.95543	7.74091	6.29025	4.94367	2.86309	III	II	I	2217.26	98.3457
YDL083C	RPS16B	Protein component of the small (40S) ribosomal subunit; homologous to mammalian ribosomal protein S16 and bacterial S9; RPS16B has a paralog, RPS16A, that arose from the whole genome duplication	I	8.57196	7.43673	6.23643	5.13424	3.63177	1.80841	-0.122984				I	1260.16	55.894
YER030W	CHZ1	Histone chaperone for Htz1p/H2A-H2B dimer; required for the stabilization of the Chz1p-Htz1-H2B complex; has overlapping function with Nap1p; null mutant displays weak sensitivity to MMS and benomyl; contains a highly conserved CHZ motif; protein abundance increases in response to DNA replication stress	I	8.1764	7.43588	6.58019	5.38894	4.07117	2.8903	-0.645498		IV	IV	I	116.965	5.18795
YPL187W	MF(ALPHA)1	Mating pheromone alpha-factor, made by alpha cells; interacts with mating type a cells to induce cell cycle arrest and other responses leading to mating; also encoded by MF(ALPHA)2, although MF(ALPHA)1 produces most alpha-factor; MF(ALPHA)1 has a paralog, MF(ALPHA)2, that arose from the whole genome duplication	I	8.62442	7.72647	6.77822	5.92352	4.69825	3.15144	0.647056	-3.77296	III	II	I	1924.21	85.3475
YBL026W	LSM2	Lsm (Like Sm) protein; part of heteroheptameric complexes (Lsm2p-7p and either Lsm1p or 8p): cytoplasmic Lsm1p complex involved in mRNA decay; nuclear Lsm8p complex part of U6 snRNP and possibly involved in processing tRNA, snoRNA, and rRNA; relocalizes from nucleus to cytoplasmic foci upon DNA replication stress	I	7.8917	7.08547	6.27866	5.23271	4.00495	2.98063	1.73862	-0.157464			I	135.551	6.01232
YGR155W	CYS4	Cystathionine beta-synthase; catalyzes synthesis of cystathionine from serine and homocysteine, the first committed step in cysteine biosynthesis; responsible for hydrogen sulfide generation; advances passage through START by promoting cell growth which requires catalytic activity, and reducing critical cell size independent of catalytic activity; mutations in human ortholog CBS cause homocystinu…	I	5.67598	4.62117	3.38892	1.91689	1.11207	0.849032					I	703.183	31.1894
YDR225W	HTA1	Histone H2A; core histone protein required for chromatin assembly and chromosome function; one of two nearly identical subtypes (see also HTA2); DNA damage-dependent phosphorylation by Mec1p facilitates DNA repair; acetylated by Nat4p; N-terminally propionylated in vivo	I	5.04886	4.56632	4.05876	3.30915	2.60247	1.44921	-0.733602	-2.77296			I	961.285	42.6375
YLR293C	GSP1	Ran GTPase; GTP binding protein (mammalian Ranp homolog) involved in the maintenance of nuclear organization, RNA processing and transport; regulated by Srm1p, Rna1p, Yrb1p, Yrb2p, Yrp4p, Yrb30p, Cse1p and Kap95p; GSP1 has a paralog, GSP2, that arose from the whole genome duplication	I	6.64971	5.48809	4.5596	3.74525	1.89081	-2.77296				II	I	1642.32	72.8445
YPL127C	HHO1	Histone H1, linker histone with roles in meiosis and sporulation; decreasing levels early in sporulation may promote meiosis, and increasing levels during sporulation facilitate compaction of spore chromatin; binds to promoters and within genes in mature spores; may be recruited by Ume6p to promoter regions, contributing to transcriptional repression outside of meiosis; suppresses DNA repair invo…	I	5.20819	4.6662	4.08568	3.24296	2.89024	1.39963	-0.333391	-2.28025			I	112.598	4.99423
YDR075W	PPH3	Catalytic subunit of protein phosphatase PP4 complex; Pph3p and Psy2p form active complex, Psy4p may provide substrate specificity; regulates recovery from the DNA damage checkpoint, the gene conversion- and single-strand annealing-mediated pathways of meiotic double-strand break repair and efficient Non-Homologous End-Joining (NHEJ) pathway; involved in activation of Gln3p to alleviate nitrogen …	I	5.56426	4.83617	4.00573	3.33376	1.31751	0.03804	-1.11033				I	36.9727	1.63991
YHL033C	RPL8A	Ribosomal 60S subunit protein L8A; required for processing of 27SA3 pre-rRNA to 27SB pre-rRNA during assembly of large ribosomal subunit; depletion leads to a turnover of pre-rRNA; L8 binds to Domain I of 25S and 5.8 S rRNAs; mutation results in decreased amounts of free 60S subunits; homologous to mammalian ribosomal protein L7A, no bacterial homolog; RPL8A has a paralog, RPL8B, that arose from …	I	5.72827	4.98226	3.95128	3.34699	1.38486	0.276072	-2.188	-2.77296	III		I	1171.3	51.9524
YMR123W	PKR1	V-ATPase assembly factor; functions with other V-ATPase assembly factors in the ER to efficiently assemble the V-ATPase membrane sector (V0); protein abundance increases in response to DNA replication stress	I	6.35901	5.32386	4.33568	3.00177	1.83379	-0.695289	-1.28025	-1.28025		IV	I	164.181	7.28217
YOR159C	SME1	Core Sm protein Sm E; part of heteroheptameric complex (with Smb1p, Smd1p, Smd2p, Smd3p, Smx3p, and Smx2p) that is part of the spliceosomal U1, U2, U4, and U5 snRNPs; homolog of human Sm E	I	4.9476	4.26832	3.73631	3.03457	2.39146	0.510808	-0.53379	-3.28025			I	63.4701	2.8152
YFL045C	SEC53	Phosphomannomutase; involved in synthesis of GDP-mannose and dolichol-phosphate-mannose; required for folding and glycosylation of secretory proteins in the ER lumen	I	5.541	4.55703	3.81563	2.97571	2.06898	-0.333391	-0.82082	-1.4729	IV	III	I	788.453	34.9716
YDR224C	HTB1	Histone H2B; core histone protein required for chromatin assembly and chromosome function; nearly identical to HTB2; Rad6p-Bre1p-Lge1p mediated ubiquitination regulates reassembly after DNA replication, transcriptional activation, meiotic DSB formation and H3 methylation	I	4.61157	3.9622	3.46727	2.8261	2.10394	0.90022	-0.766586	-1.95832		I	I	1196.48	53.0695
YLR058C	SHM2	Cytosolic serine hydroxymethyltransferase; converts serine to glycine plus 5,10 methylenetetrahydrofolate; major isoform involved in generating precursors for purine, pyrimidine, amino acid, and lipid biosynthesis	I	6.30919	5.53088	4.40625	2.63816	0.551521	-0.139868	-1.2611	-1.45103		IV	I	338.353	15.0075
YOL120C	RPL18A	Ribosomal 60S subunit protein L18A; intron of RPL18A pre-mRNA forms stem-loop structures that are a target for Rnt1p cleavage leading to degradation; homologous to mammalian ribosomal protein L18, no bacterial homolog; RPL18A has a paralog, RPL18B, that arose from the whole genome duplication	I	5.83651	4.76941	3.65494	2.93599	1.81187	1.04008	-2.77296	-3.77296	IV	III	II	945.938	41.9568
YMR143W	RPS16A	Protein component of the small (40S) ribosomal subunit; homologous to mammalian ribosomal protein S16 and bacterial S9; RPS16A has a paralog, RPS16B, that arose from the whole genome duplication	I	6.1551	4.80032	4.0765	2.54073	1.97375	-0.280251	-1.4729	-4.28025		II	I	1028.17	45.6043
YNL110C	NOP15	Constituent of 66S pre-ribosomal particles; involved in 60S ribosomal subunit biogenesis; localizes to both nucleolus and cytoplasm	I	6.90911	6.11516	5.38104	4.4756	3.18617	1.68255	0.233414	-4.28025		I	I	168.558	7.47633
YBR233W-A	DAD3	Essential subunit of the Dam1 complex (aka DASH complex); complex couples kinetochores to the force produced by MT depolymerization thereby aiding in chromosome segregation; is transferred to the kinetochore prior to mitosis	I	5.05981	4.52278	3.7608	3.012	2.43045	1.83928	-0.958323	-1.4729			II	27.9205	1.2384
YGR034W	RPL26B	Ribosomal 60S subunit protein L26B; binds to 5.8S rRNA; non-essential even when paralog is also deleted; deletion has minimal affections on ribosome biosynthesis; homologous to mammalian ribosomal protein L26 and bacterial L24; RPL26B has a paralog, RPL26A, that arose from the whole genome duplication	I	6.97957	6.17691	5.37753	4.39017	3.53288	2.45058	1.12475	-0.122984			I	1129.31	50.0901
YBL027W	RPL19B	Ribosomal 60S subunit protein L19B; rpl19a and rpl19b single null mutations result in slow growth, while the double null mutation is lethal; homologous to mammalian ribosomal protein L19, no bacterial homolog; RPL19B has a paralog, RPL19A, that arose from the whole genome duplication	I	7.17663	6.04811	5.02723	3.61082	1.99359	-1.13576	-2.13576	-2.13576	IV	II	I	2218.02	98.3794
YBR162C	TOS1	Covalently-bound cell wall protein of unknown function; identified as a cell cycle regulated SBF target gene; deletion mutants are highly resistant to treatment with beta-1,3-glucanase; has sequence similarity to YJL171C	I	5.55125	5.1974	4.57079	3.16457	2.25	1.2631	-0.898777	-1.84159			I	487.685	21.6311
YDR381W	YRA1	Nuclear polyadenylated RNA-binding protein; required for export of poly(A)+ mRNA from the nucleus; proposed to couple mRNA export with 3' end processing via its interactions with Mex67p and Pcf11p; interacts with DBP2; inhibits the helicase activity of Dbp2; functionally redundant with Yra2p, another REF family member	I	5.73564	4.78956	3.98706	3.07131	2.387	1.02456	-0.695289	-4.28025			I	165.306	7.33207
YMR307W	GAS1	Beta-1,3-glucanosyltransferase; required for cell wall assembly and also has a role in transcriptional silencing; localizes to cell surface via a glycosylphosphatidylinositol (GPI) anchor; also found at nuclear periphery; genetic interactions with histone H3 lysine acetyltransferases GCN5 and SAS3 indicate previously unsuspected functions for Gas1 in DNA damage response and cell cycle regulation	I	6.20418	5.35621	4.37423	3.24705	2.30632	0.775645	-1.95832	-3.28025			I	1424.69	63.1915
YOR224C	RPB8	RNA polymerase subunit ABC14.5; common to RNA polymerases I, II, and III	I	5.68808	5.00848	4.58479	3.87007	2.78983	1.56989	0.488681	-1.04431	IV	II	I	401.885	17.8255
YOL012C	HTZ1	Histone variant H2AZ; exchanged for histone H2A in nucleosomes by the SWR1 complex; involved in transcriptional regulation through prevention of the spread of silent heterochromatin; Htz1p-containing nucleosomes facilitate RNA Pol II passage by affecting correct assembly and modification status of RNA Pol II elongation complexes and by favoring efficient nucleosome remodeling	I	7.18067	6.3356	5.60468	4.82315	3.93138	2.43261	-0.08931	-2.33811		III	I	134.271	5.95553
YKL166C	TPK3	cAMP-dependent protein kinase catalytic subunit; promotes vegetative growth in response to nutrients via the Ras-cAMP signaling pathway; partially redundant with Tpk1p and Tpk2p; localizes to P-bodies during stationary phase; TPK3 has a paralog, TPK1, that arose from the whole genome duplication	I	5.67927	4.80651	3.54745	2.45501	1.73062	1.01512	-0.827438				I	30.8795	1.36965
YLR344W	RPL26A	Ribosomal 60S subunit protein L26A; binds to 5.8S rRNA; non-essential even when paralog is also deleted; deletion has minimal affections on ribosome biosynthesis; homologous to mammalian ribosomal protein L26 and bacterial L24; RPL26A has a paralog, RPL26B, that arose from the whole genome duplication	I	7.04139	5.72682	4.51551	3.46984	2.3576	0.572711	-1.84159		II	II	I	558.553	24.7744
YDR524C-B		Putative protein of unknown function; YDR524C-B has a paralog, YCL048W-A, that arose from the whole genome duplication	I	5.56671	4.53409	3.78702	3.21377	2.47539	0.686186	-1.28025				I	4059.45	180.056
YGL097W	SRM1	Nucleotide exchange factor for Gsp1p; localizes to the nucleus, required for nucleocytoplasmic trafficking of macromolecules; suppressor of the pheromone response pathway; potentially phosphorylated by Cdc28p	I	5.23795	4.63147	4.40983	3.86681	2.84604	0.572711	-0.261102			I	I	106.002	4.70169
YKL043W	PHD1	Transcriptional activator that enhances pseudohyphal growth; physically interacts with the Tup1-Cyc8 complex and recruits Tup1p to its targets; regulates expression of FLO11, an adhesin required for pseudohyphal filament formation; similar to StuA, an A. nidulans developmental regulator; potential Cdc28p substrate; PHD1 has a paralog, SOK2, that arose from the whole genome duplication	I	4.66986	4.28465	3.44664	2.91274	2.4831	1.1964	-0.388564	-1.4729			I	28.1614	1.24909
YCR031C	RPS14A	Protein component of the small (40S) ribosomal subunit; required for ribosome assembly and 20S pre-rRNA processing; mutations confer cryptopleurine resistance; homologous to mammalian ribosomal protein S14 and bacterial S11; RPS14A has a paralog, RPS14B, that arose from the whole genome duplication	I	5.76106	4.89709	3.96373	2.44055	1.46198	1.30792	0.434771		II	II	I	1879.06	83.3452
YBL002W	HTB2	Histone H2B; core histone protein required for chromatin assembly and chromosome function; nearly identical to HTB1; Rad6p-Bre1p-Lge1p mediated ubiquitination regulates reassembly after DNA replication, transcriptional activation, meiotic DSB formation and H3 methylation	I	4.22017	3.69692	3.15809	2.47908	2.25588	1.14622	-0.82082			III	II	1044.94	46.3478
YML093W	UTP14	Subunit of U3-containing Small Subunit (SSU) processome complex; involved in production of 18S rRNA and assembly of small ribosomal subunit	I	5.76069	5.03067	4.43859	3.84611	2.76476	2.20574	0.997451	-4.28025		I	I	85.7514	3.80348
YDL070W	BDF2	Protein involved in transcription initiation; acts at TATA-containing promoters; associates with the basal transcription factor TFIID; contains two bromodomains; corresponds to the C-terminal region of mammalian TAF1; redundant with Bdf1p; protein abundance increases in response to DNA replication stress; BDF2 has a paralog, BDF1, that arose from the whole genome duplication	I	5.11248	4.79271	4.26147	3.34699	2.62996	1.91181	0.147909		IV	III	I	89.1663	3.95494
YPL218W	SAR1	GTPase, GTP-binding protein of the ARF family; component of COPII coat of vesicles; required for transport vesicle formation during ER to Golgi protein transport; lowers membrane rigidity helping in vesicle formation	I	7.65538	6.46345	5.63439	4.49341	3.52888	2.43045	0.68386				I	343.275	15.2259
YNL113W	RPC19	RNA polymerase subunit AC19; common to RNA polymerases I and III	I	7.48215	6.71022	5.84751	5.04817	4.07647	1.56342	-4.28025			I	I	258.89	11.483
YNL066W	SUN4	Cell wall protein related to glucanases; possibly involved in cell wall septation; member of the SUN family; SUN4 has a paralog, SIM1, that arose from the whole genome duplication	I	5.21559	4.4388	4.01786	3.14522	2.31582	0.768809	-1.13576	-2.69529			I	323.994	14.3706
YPL220W	RPL1A	Ribosomal 60S subunit protein L1A; N-terminally acetylated; homologous to mammalian ribosomal protein L10A and bacterial L1; RPL1A has a paralog, RPL1B, that arose from the whole genome duplication; rpl1a rpl1b double null mutation is lethal	I	6.8355	5.61445	4.69926	3.82261	2.78827	2.14178	0.463501	-2.13576	III	II	I	194.125	8.61034
YDR471W	RPL27B	Ribosomal 60S subunit protein L27B; homologous to mammalian ribosomal protein L27, no bacterial homolog; RPL27B has a paralog, RPL27A, that arose from the whole genome duplication	I	8.34562	7.23852	6.26757	5.04615	3.84747	2.56595	0.311123	-3.28025	III	II	I	738.653	32.7627
YNL030W	HHF2	Histone H4; core histone protein required for chromatin assembly and chromosome function; one of two identical histone proteins (see also HHF1); contributes to telomeric silencing; N-terminal domain involved in maintaining genomic integrity	I	5.91772	5.3645	4.78177	4.14406	3.343	1.87167	0.030289	-1.38856		II	I	1294.96	57.4374
YLR325C	RPL38	Ribosomal 60S subunit protein L38; homologous to mammalian ribosomal protein L38, no bacterial homolog	I	5.87009	4.61991	3.94232	2.32517	1.58428	-0.076942	-1.4729		III	II	I	3324.77	147.469
YGR234W	YHB1	Nitric oxide oxidoreductase; flavohemoglobin involved in nitric oxide detoxification; plays a role in the oxidative and nitrosative stress responses; protein increases in abundance and relocalizes from nucleus to cytoplasmic foci upon DNA replication stress	I	7.53047	6.66754	5.61188	4.59622	3.65872	2.01892	0.115946	-1.23339		II	I	458.786	20.3493
YKR094C	RPL40B	Ubiquitin-ribosomal 60S subunit protein L40B fusion protein; cleaved to yield ubiquitin and ribosomal protein L40B; ubiquitin may facilitate assembly of the ribosomal protein into ribosomes; homologous to mammalian ribosomal protein L40, no bacterial homolog; RPL40B has a paralog, RPL40A, that arose from the whole genome duplication	I	6.49759	5.51949	4.82123	3.84777	2.63553	1.22005	0.206552	-1.84159			I	978.05	43.3811
YPR182W	SMX3	Core Sm protein Sm F; part of heteroheptameric complex (with Smb1p, Smd1p, Smd2p, Smd3p, Sme1p, and Smx2p) that is part of the spliceosomal U1, U2, U4, and U5 snRNPs; homolog of human Sm F	I	6.27303	5.01745	4.40142	3.18617	1.90546	-0.645498	-0.82082	-1.28025			I	78.362	3.47572
YMR161W	HLJ1	Co-chaperone for Hsp40p; anchored in the ER membrane; with its homolog Ydj1p promotes ER-associated protein degradation (ERAD) of integral membrane substrates; similar to E. coli DnaJ	II	3.95292	3.52751	2.98264	2.77052	0.793805	0.598542	-3.28025			II	II	42.955	1.90525
YOR248W		Dubious open reading frame; unlikely to encode a functional protein, based on available experimental and comparative sequence data	II	3.89109	2.63049	2.41879	0.805074	-0.036152	-1.09329	-1.45103	-2.188			II	0.501753	0.0222551
YJL148W	RPA34	RNA polymerase I subunit A34.5; essential for nucleolar assembly and for high polymerase loading rate; nucleolar localization depends on Rpa49p	II	3.9997	3.45284	1.88247	1.19823	1.0682	-1.69529				II	II	121.009	5.36729
YPL081W	RPS9A	Protein component of the small (40S) ribosomal subunit; homologous to mammalian ribosomal protein S9 and bacterial S4; RPS9A has a paralog, RPS9B, that arose from the whole genome duplication	II	4.94549	4.26142	2.99153	1.58693	1.30792	-0.333391	-3.28025			I	I	168.582	7.47741
YDR334W	SWR1	Swi2/Snf2-related ATPase; structural component of the SWR1 complex, which exchanges histone variant H2AZ (Htz1p) for chromatin-bound histone H2A; relocalizes to the cytosol in response to hypoxia; chronological aging factor that mediates lifespan extension by dietary restriction	II	4.50619	3.68288	2.64996	1.41003	0.140728	-0.333391	-2.13576				II	28.8583	1.28
YBR052C	RFS1	Protein of unknown function; member of a flavodoxin-like fold protein family that includes Pst2p and Ycp4p; green fluorescent protein (GFP)-fusion protein localizes to the cytoplasm in a punctate pattern; RFS1 has a paralog, PST2, that arose from the whole genome duplication	II	5.50111	4.62577	3.24508	2.17412	0.030289	-3.00442					I	98.0204	4.34766
YDL064W	UBC9	SUMO-conjugating enzyme involved in the Smt3p conjugation pathway; nuclear protein required for S- and M-phase cyclin degradation and mitotic control; involved in proteolysis mediated by the anaphase-promoting complex cyclosome (APCC)	II	5.394	4.26027	3.45675	1.57271	-2.77296					II	II	106.107	4.70635
YGL153W	PEX14	Central component of the peroxisomal importomer complex; peroxisomal protein import machinery docking complex component; interacts with both PTS1 (Pex5p) and PTS2 (Pex7p) peroxisomal matrix protein signal recognition factors and membrane receptor Pex13p	II	5.32279	4.37915	3.63015	2.43546	1.52305	-1.20619	-3.28025	-4.28025		IV	I	21.8903	0.970935
YLR406C	RPL31B	Ribosomal 60S subunit protein L31B; associates with karyopherin Sxm1p; loss of both Rpl31p and Rpl39p confers lethality; homologous to mammalian ribosomal protein L31, no bacterial homolog; RPL31B has a paralog, RPL31A, that arose from the whole genome duplication	II	4.63036	3.52581	2.15401	1.24666	0.719749	0.17918	-0.280251	-0.958323	II	III	I	505.462	22.4196
YKL006W	RPL14A	Ribosomal 60S subunit protein L14A; N-terminally acetylated; homologous to mammalian ribosomal protein L14, no bacterial homolog; RPL14A has a paralog, RPL14B, that arose from the whole genome duplication	II	5.17062	3.7907	1.82722	0.961694	-0.695289	-1.95832					II	219.98	9.75713
YDR361C	BCP1	Essential protein involved in nuclear export of Mss4p; Mss4p is a lipid kinase that generates phosphatidylinositol 4,5-biphosphate and plays a role in actin cytoskeleton organization and vesicular transport	II	5.03693	4.24195	3.06948	1.64183	0.646763	0.140728				I	I	109.496	4.85667
YBR283C	SSH1	Subunit of the Ssh1 translocon complex; Sec61p homolog involved in co-translational pathway of protein translocation; not essential	II	4.97994	3.96973	2.58304	2.0559	1.59854	-2.00442	-3.77296				I	297.749	13.2065
YBL052C	SAS3	Histone acetyltransferase catalytic subunit of NuA3 complex; acetylates histone H3, involved in transcriptional silencing; homolog of the mammalian MOZ proto-oncogene; mutant has aneuploidy tolerance; sas3gcn5 double mutation is lethal	II	4.80278	3.57354	2.78591	2.0091	0.73638	-0.645498	-1.95832	-1.95832			II	24.0645	1.06737
YNL141W	AAH1	Adenine deaminase (adenine aminohydrolase); converts adenine to hypoxanthine; involved in purine salvage; transcriptionally regulated by nutrient levels and growth phase; Aah1p degraded upon entry into quiescence via SCF and the proteasome	II	4.52128	3.72699	3.11848	1.60761	1.47329	-3.00442	-3.77296			I	II	221.819	9.83873
YEL036C	ANP1	Subunit of the alpha-1,6 mannosyltransferase complex; type II membrane protein; has a role in retention of glycosyltransferases in the Golgi; involved in osmotic sensitivity and resistance to aminonitrophenyl propanediol	II	5.41593	4.55228	3.11719	2.50744	0.119391	-3.77296					I	80.872	3.58705
YNL031C	HHT2	Histone H3; core histone protein required for chromatin assembly, part of heterochromatin-mediated telomeric and HM silencing; one of two identical histone H3 proteins (see HHT1); regulated by acetylation, methylation, and phosphorylation; H3K14 acetylation plays an important role in the unfolding of strongly positioned nucleosomes during repair of UV damage	II	4.98739	4.13773	3.22014	2.28089	1.42176	-1.38856	-3.77296	-3.77296	IV	I	I	1010.32	44.8124
YDR496C	PUF6	Pumilio-homology domain protein; binds the 3' UTR of ASH1 mRNA and represses its translation, resulting in proper asymmetric localization of ASH1 mRNA; required at post-transcriptional step for efficient retrotransposition; absence results in decreased Ty1 Gag:GFP protein levels; co-sediments with the 60S ribosomal subunit and is required for its biogenesis	II	5.66332	4.31136	3.60542	3.03417	0.939465	-1.28025	-4.28025	-4.28025		I	II	226.029	10.0254
YKL156W	RPS27A	Protein component of the small (40S) ribosomal subunit; homologous to mammalian ribosomal protein S27, no bacterial homolog; RPS27A has a paralog, RPS27B, that arose from the whole genome duplication; protein abundance increases in response to DNA replication stress	II	4.35583	3.60435	3.01101	2.08381	1.11573	0.25	-2.50567	-4.28025		III	I	500.012	22.1779
YDR433W		Dubious open reading frame; unlikely to encode a functional protein, based on available experimental and comparative sequence data	II	4.09123	3.66977	3.08618	1.74449	0.853431	-2.00442	-3.77296	-3.77296			II	6.30893	0.27983
YPR132W	RPS23B	Ribosomal protein 28 (rp28) of the small (40S) ribosomal subunit; required for translational accuracy; homologous to mammalian ribosomal protein S23 and bacterial S12; RPS23B has a paralog, RPS23A, that arose from the whole genome duplication; deletion of both RPS23A and RPS23B is lethal	II	5.40829	4.10307	3.3205	2.51286	1.61403	-2.00442	-2.33811				II	1366.72	60.6205
YFL017W-A	SMX2	Core Sm protein Sm G; part of heteroheptameric complex (with Smb1p, Smd1p, Smd2p, Smd3p, Sme1p, and Smx3p) that is part of the spliceosomal U1, U2, U4, and U5 snRNPs; homolog of human Sm G	II	4.11955	3.4445	2.66108	2.04835	0.83601	0.411437	-0.206195	-1.69529		IV	II	68.6363	3.04434
YLR303W	MET17	O-acetyl homoserine-O-acetyl serine sulfhydrylase; required for Methionine and cysteine biosynthesis	II	5.08721	3.97951	3.21004	1.92637	-0.338109	-2.28025				IV	I	241.197	10.6982
YIL126W	STH1	ATPase component of the RSC chromatin remodeling complex; required for expression of early meiotic genes; promotes base excision repair in chromatin; essential helicase-related protein homologous to Snf2p	II	3.47266	2.60193	2.11411	1.78041	0.995577	-1.4729	-1.69529				II	68.9613	3.05876
YOR058C	ASE1	Mitotic spindle midzone-localized microtubule bundling protein; microtubule-associated protein (MAP) family member; required for spindle elongation and stabilization; undergoes cell cycle-regulated degradation by anaphase promoting complex; potential Cdc28p substrate; relative distribution to microtubules decreases upon DNA replication stress	II	3.38999	2.72689	2.50391	1.605	1.17918	0.243311					II	23.2876	1.03291
YOL097C	WRS1	Cytoplasmic tryptophanyl-tRNA synthetase; aminoacylates tryptophanyl-tRNA	II	4.64346	4.06889	3.65438	1.59096	-0.472896					III	II	239.307	10.6144
YPL038W	MET31	Zinc-finger DNA-binding transcription factor; targets strong transcriptional activator Met4p to promoters of sulfur metabolic genes; involved in transcriptional regulation of the methionine biosynthetic genes; feedforward loop controlling expression of MET32 and the lack of such a loop for MET31 may account for the differential actions of Met31p and Met32p; MET31 has a paralog, MET32, that arose …	II	5.3511	4.47613	3.01639	2.19813	1.02846	0.026624	-2.13576				I	37.6895	1.67171
YKR056W	TRM2	tRNA methyltransferase; 5-methylates the uridine residue at position 54 of tRNAs and may also have a role in tRNA stabilization or maturation; endo-exonuclease with a role in DNA repair	II	4.9683	3.88187	3.08205	1.74588	-1.23339				IV	III	I	76.813	3.40702
YER070W	RNR1	Major isoform of large subunit of ribonucleotide-diphosphate reductase; the RNR complex catalyzes rate-limiting step in dNTP synthesis, regulated by DNA replication and DNA damage checkpoint pathways via localization of small subunits; relative distribution to the nucleus increases upon DNA replication stress; RNR1 has a paralog, RNR3, that arose from the whole genome duplication	II	4.66108	3.89103	2.7007	1.41003	-0.567997					III	II	285.932	12.6824
YGR260W	TNA1	High affinity nicotinic acid plasma membrane permease; responsible for uptake of low levels of nicotinic acid; expression of the gene increases in the absence of extracellular nicotinic acid or para-aminobenzoate (PABA)	II	5.06466	4.18663	3.2397	1.73876	0.417392	-0.898777	-3.77296	-3.77296			I	116.093	5.14928
YDL014W	NOP1	Histone glutamine methyltransferase, modifies H2A at Q105 in nucleolus; component of the small subunit processome complex, which is required for processing of pre-18S rRNA; ortholog of mammalian fibrillarin	II	5.21982	3.96481	3.32368	2.25157	0.130099	-1.7336	-3.28025			I	II	628.804	27.8904
YGR014W	MSB2	Mucin family member involved in various signaling pathways; functions as osmosensor in the Sho1p-mediated HOG pathway; functions in Cdc42p- and MAP kinase-dependent filamentous growth signaling pathway; processed into secreted and cell-associated forms by aspartyl protease Yps1p; potential Cdc28p substrate	II	5.99257	4.79868	3.87787	2.24508	-0.597368	-2.77296	-3.77296			III	II	81.6052	3.61957
YMR194C-A		Dubious open reading frame; unlikely to encode a functional protein, based on available experimental and comparative sequence data	II	4.36088	3.4719	2.86046	1.69111	1.03599	-0.695289	-0.695289	-0.958323			II	4.3869	0.194579
YER072W	VTC1	Subunit of the vacuolar transporter chaperone (VTC) complex; VTC complex is involved in membrane trafficking, vacuolar polyphosphate accumulation, microautophagy and non-autophagic vacuolar fusion; also has mRNA binding activity; protein abundance increases in response to DNA replication stress	II	6.03793	4.71214	3.76682	2.85775	1.02272	-0.695289					I	664.622	29.4791
YBR189W	RPS9B	Protein component of the small (40S) ribosomal subunit; homologous to mammalian ribosomal protein S9 and bacterial S4; RPS9B has a paralog, RPS9A, that arose from the whole genome duplication	II	5.53335	4.38085	2.68807	1.79609	0.651823	-1.06859	-1.7336	-1.7336		I	II	2283.2	101.271
YDL046W	NPC2	Sterol transport protein and functional homolog of human NPC2/He1; human NPC2 is a cholesterol-binding protein whose deficiency causes Niemann-Pick type C2 disease involving retention of cholesterol in lysosomes; yeast NPC2 can complement mutations in human NPC2	II	6.08875	5.22579	4.26616	2.79327	0.551521	-2.33811	-3.77296				I	139.135	6.17129
YKR081C	RPF2	Essential protein involved in rRNA maturation and ribosomal assembly; involved in the processing of pre-rRNA and the assembly of the 60S ribosomal subunit; interacts with ribosomal protein L11; localizes predominantly to the nucleolus; constituent of 66S pre-ribosomal particles	II	4.47806	3.51833	2.88443	2.3275	1.10665	-1.95832	-2.28025			I	II	191.533	8.49536
YIL127C	RRT14	Putative protein of unknown function; identified in a screen for mutants with decreased levels of rDNA transcription; green fluorescent protein (GFP)-fusion protein localizes to the nucleolus; predicted to be involved in ribosome biogenesis	II	4.4723	3.83989	2.65997	0.883359	-0.766586	-3.28025	-3.28025	-3.28025		III	II	85.5724	3.79554
YML075C	HMG1	HMG-CoA reductase; catalyzes the conversion of HMG-CoA to mevalonate, which is a rate-limiting step in sterol biosynthesis; one of two isozymes; localizes to the nuclear envelope; overproduction induces the formation of karmellae; forms foci at the nuclear periphery upon DNA replication stress; HMG1 has a paralog, HMG2, that arose from the whole genome duplication	II	5.13595	4.58619	3.60512	2.63816	0.846955	-1.41946	-2.69529	-4.28025			I	60.6974	2.69221
YMR116C	ASC1	G-protein beta subunit and guanine dissociation inhibitor for Gpa2p; ortholog of RACK1 that inhibits translation; core component of the small (40S) ribosomal subunit; required to prevent frameshifting at ribosomes stalled at repeated CGA codons; regulates P-body formation induced by replication stress; represses Gcn4p in the absence of amino acid starvation	II	4.48556	3.59213	2.81287	1.25978	-0.219727	-1.38856	-4.28025			II	II	2553.12	113.243
YDR190C	RVB1	ATP-dependent DNA helicase, also known as pontin; member of the AAA+ and RuvB-like protein families; similar to Rvb2p; conserved component of multiple complexes including the INO80 complex, the Swr1 complex, and the R2TP complex (Rvb1-Rvb2-Tah1-Pih1); involved in multiple processes such as chromatin remodeling, box C/D snoRNP assembly, and RNA polymerase II assembly	II	4.8834	3.71332	2.49846	1.37121	-0.695289	-4.28025				IV	II	141.815	6.29014
YML123C	PHO84	High-affinity inorganic phosphate (Pi) transporter; also low-affinity manganese transporter; regulated by Pho4p and Spt7p; mutation confers resistance to arsenate; exit from the ER during maturation requires Pho86p; cells overexpressing Pho84p accumulate heavy metals but do not develop symptoms of metal toxicity	II	4.90529	3.898	3.15804	2.42541	0.889674	-3.28025	-4.28025			I	I	984.422	43.6637
YBR252W	DUT1	deoxyuridine triphosphate diphosphatase (dUTPase); catalyzes hydrolysis of dUTP to dUMP and PPi, thereby preventing incorporation of uracil into DNA during replication; critical for the maintenance of genetic stability; also has diphosphatase activity on deoxyinosine triphosphate	II	5.39565	4.12908	3.45177	1.95074	0.606534	-0.965605	-0.965605		IV	I	II	143.591	6.36892
YLR218C	COA4	Twin Cx(9)C protein involved in cytochrome c oxidase organization; organization includes assembly or stability; localizes to the mitochondrial intermembrane space via the Mia40p-Erv1p system; interacts genetically with CYC1 and with cytochrome c oxidase assembly factors	II	5.44628	4.84017	4.50691	2.49034	-3.77296				I	IV	II	8.3326	0.36959
YDL184C	RPL41A	Ribosomal 60S subunit protein L41A; comprises only 25 amino acids; rpl41a rpl41b double null mutant is viable; homologous to mammalian ribosomal protein L41, no bacterial homolog; RPL41A has a paralog, RPL41B, that arose from the whole genome duplication	II	4.79841	3.8898	2.90241	1.90459	1.16383	-3.77296	-3.77296	-3.77296	III	II	II	2977.47	132.065
YGR274C	TAF1	TFIID subunit, involved in RNA pol II transcription initiation; possesses in vitro histone acetyltransferase activity but its role in vivo appears to be minor; involved in promoter binding and G1/S progression; relocalizes to the cytosol in response to hypoxia	II	4.52874	3.59309	2.74685	1.78367	-1.50567	-1.7336	-2.13576	-2.50567		II	I	26.1115	1.15817
YIL069C	RPS24B	Protein component of the small (40S) ribosomal subunit; homologous to mammalian ribosomal protein S24, no bacterial homolog; RPS24B has a paralog, RPS24A, that arose from the whole genome duplication	II	5.82888	4.79683	3.48418	2.04745	-0.981189				III	I	I	495.88	21.9946
YOL059W	GPD2	NAD-dependent glycerol 3-phosphate dehydrogenase; expression is controlled by an oxygen-independent signaling pathway required to regulate metabolism under anoxic conditions; located in cytosol and mitochondria; constitutively active but is inactivated via phosphorylation by energy-stress responsive kinase SNF1; GPD2 has a paralog, GPD1, that arose from the whole genome duplication	II	4.38049	3.33686	2.30877	1.07929	0.351575	-0.651358	-0.965605	-1.188	III	I	II	123.067	5.45859
YDR129C	SAC6	Fimbrin, actin-bundling protein; cooperates with calponin/transgelin Scp1p in organization and maintenance of actin cytoskeleton; relocalizes from plasma membrane to cytoplasm upon DNA replication stress; human homologs PLS3 and LCP1 implicated in spinocerebellar ataxia type 2 (SCA2) can each complement yeast null mutant	II	5.60074	4.54155	2.72752	1.46486	0.223448	-0.430114	-1.28025			IV	I	199.533	8.85024
YHR058C	MED6	Subunit of the RNA polymerase II mediator complex; associates with core polymerase subunits to form the RNA polymerase II holoenzyme; essential for transcriptional regulation; protein abundance increases in response to DNA replication stress	II	4.00189	3.7041	2.99798	1.86219	0.634478	-1.23339				III	II	31.3631	1.3911
YLR363W-A		Protein of unknown function; green fluorescent protein (GFP)-fusion protein localizes to the nucleus; relocalizes from nucleus to nucleolus upon DNA replication stress	II	5.20399	4.22202	2.57593	1.88879	-0.663877	-3.28025	-4.28025		IV	I	II	83.6767	3.71145
YOR101W	RAS1	GTPase involved in G-protein signaling in adenylate cyclase activation; plays a role in cell proliferation; localized to the plasma membrane; homolog of mammalian RAS proto-oncogenes; relative distribution to the nucleus increases upon DNA replication stress; RAS1 has a paralog, RAS2, that arose from the whole genome duplication	II	5.05491	3.96779	3.23018	0.36976	-1.2611	-1.77296					I	129.357	5.73759
YGL014W	PUF4	Member of the PUF protein family; PUF family is defined by the presence of Pumilio homology domains that confer RNA binding activity; preferentially binds mRNAs encoding nucleolar ribosomal RNA-processing factors	II	4.29551	3.59348	2.18956	1.0848	-0.192788	-1.95832	-2.69529				III	86.9588	3.85703
YER110C	KAP123	Karyopherin beta; mediates nuclear import of ribosomal proteins prior to assembly into ribosomes and import of histones H3 and H4; localizes to the nuclear pore, nucleus, and cytoplasm; exhibits genetic interactions with RAI1	II	2.96726	1.72569	1.29998	-0.489192	-1.28025	-1.28025	-1.4729			II	II	401.026	17.7874
YDR504C	SPG3	Protein required for high temperature survival during stationary phase; not required for growth on nonfermentable carbon sources	II	4.25903	2.97232	2.13383	0.9087	-1.4729						II	12.691	0.562906
YDL229W	SSB1	Cytoplasmic ATPase that is a ribosome-associated molecular chaperone; functions with J-protein partner Zuo1p; may be involved in folding of newly-made polypeptide chains; member of the HSP70 family; interacts with phosphatase subunit Reg1p; SSB1 has a paralog, SSB2, that arose from the whole genome duplication	II	3.76332	2.96672	2.24666	0.402632	-0.489192	-1.59737					I	1769.19	78.4718
YOR320C	GNT1	N-acetylglucosaminyltransferase; capable of modification of N-linked glycans in the Golgi apparatus	II	3.25245	2.62482	1.9747	-0.012406	-2.00442	-2.00442					II	66.3535	2.94309
YOR116C	RPO31	RNA polymerase III largest subunit C160; part of core enzyme; similar to bacterial beta-prime subunit and to RPA190 and RPO21	II	3.54302	2.56334	2.37877	1.76991	0.378768						II	114.623	5.08405
YJR086W	STE18	G protein gamma subunit; forms a dimer with Ste4p to activate the mating signaling pathway, forms a heterotrimer with Gpa1p and Ste4p to dampen signaling; C-terminus is palmitoylated and farnesylated, which are required for normal signaling	II	3.06992	2.22255	2.04926	-0.000677	-0.333391	-3.77296					III	60.2072	2.67047
YDL159W	STE7	Signal transducing MAP kinase kinase; involved in pheromone response where it phosphorylates Fus3p; involved in the pseudohyphal/invasive growth pathway where it phosphorylates of Kss1p; phosphorylated by Ste11p; degraded by ubiquitin pathway	II	3.03747	1.95267	1.4463	0.480337	-1.23339						II	18.6516	0.827284
YLR017W	MEU1	Methylthioadenosine phosphorylase (MTAP); catalyzes the initial step in the methionine salvage pathway; affects polyamine biosynthesis through regulation of ornithine decarboxylase (Spe1p) activity; regulates ADH2 gene expression	II	3.92957	2.73813	2.02261	0.041677	-0.110326	-1.4729				II	II	150.332	6.66792
YER012W	PRE1	Beta 4 subunit of the 20S proteasome; localizes to the nucleus throughout the cell cycle	II	3.12834	2.11853	1.66307	1.27453	-0.219727	-1.84159	-3.77296	-3.77296			II	262.704	11.6522
YDL226C	GCS1	ADP-ribosylation factor GTPase activating protein (ARF GAP); involved in ER-Golgi transport; required for prospore membrane formation; regulates phospholipase Spo14p; shares functional similarity with Glo3p; GCS1 has a paralog, SPS18, that arose from the whole genome duplication	II	3.85592	2.9314	1.2874	0.912922	-1.23339	-2.77296	-3.77296	-3.77296			II	120.267	5.33442
YBL076C	ILS1	Cytoplasmic isoleucine-tRNA synthetase; target of the G1-specific inhibitor reveromycin A	II	3.8903	3.07735	2.55598	0.626639	0.17918	-1.28025	-4.28025		III	III	II	722.227	32.0341
YNL131W	TOM22	Component of the TOM (Translocase of Outer Membrane) complex; responsible for initial import of mitochondrially directed proteins; mediates interaction between TOM and TIM complexes and acts as a receptor for precursor proteins	II	3.77939	2.24921	1.56736	0.58054	-0.898777	-3.00442			I		II	280.284	12.4319
YLR321C	SFH1	Component of the RSC chromatin remodeling complex; essential gene required for cell cycle progression and maintenance of proper ploidy; phosphorylated in the G1 phase of the cell cycle; Snf5p paralog	II	2.89709	2.63801	2.19976	-0.280251							III	42.6118	1.89003
YDL213C	NOP6	rRNA-binding protein required for 40S ribosomal subunit biogenesis; contains an RNA recognition motif (RRM); hydrophilin essential to overcome the stress of the desiccation-rehydration process; NOP6 may be a fungal-specific gene as no homologs have been yet identified in higher eukaryotes	II	3.96609	3.1167	2.7007	1.22185	0.543533	-4.28025			IV	I	II	107.817	4.78221
YMR158W	MRPS8	Mitochondrial ribosomal protein of the small subunit	II	2.91645	2.37589	1.76771	-0.373361	-0.82082				II			57.4066	2.54625
YEL054C	RPL12A	Ribosomal 60S subunit protein L12A; rpl12a rpl12b double mutant exhibits slow growth and slow translation; homologous to mammalian ribosomal protein L12 and bacterial L11; RPL12A has a paralog, RPL12B, that arose from the whole genome duplication	II	3.72548	2.86264	2.16634	0.351575	-0.981189	-4.28025	-4.28025	-4.28025	IV	III	II	2193.57	97.2952
YDR363W-A	SEM1	Component of lid subcomplex of 26S proteasome regulatory subunit; involved in mRNA export mediated by TREX-2 complex (Sac3p-Thp1p); assumes different conformations in different contexts, functions as molecular glue stabilizing the Rpn3p/Rpn7p regulatory heterodimer, and tethers it to lid helical bundle; ortholog of human DSS1; protein abundance increases in response to DNA replication stress	II	3.29447	1.80721	1.55264	0.889674	-0.032324					IV	III	203.671	9.03375
YDR297W	SUR2	Sphinganine C4-hydroxylase; catalyses the conversion of sphinganine to phytosphingosine in sphingolipid biosyntheis	II	3.72967	3.00236	1.96073	0.937514	0.729355	-4.28025					II	109.931	4.87595
YFR001W	LOC1	Nuclear protein involved in asymmetric localization of ASH1 mRNA; binds double-stranded RNA in vitro; constituent of 66S pre-ribosomal particles; required at post-transcriptional step for efficient retrotransposition; absence results in decreased Ty1 Gag:GFP protein levels; relocalizes from nucleus to cytoplasm upon DNA replication stress	II	3.77007	3.20802	2.32302	-0.270645	-0.615141	-1.63314	-2.188	-2.188		II	II	77.313	3.42919
YGL135W	RPL1B	Ribosomal 60S subunit protein L1B; N-terminally acetylated; homologous to mammalian ribosomal protein L10A and bacterial L1; RPL1B has a paralog, RPL1A, that arose from the whole genome duplication; rpl1a rpl1b double null mutation is lethal	II	2.77346	1.89093	0.969821	0.69111	-0.280251	-4.28025			IV		III	214.167	9.49929
YMR225C	MRPL44	Mitochondrial ribosomal protein of the large subunit; protein abundance increases in response to DNA replication stress	II	3.36673	2.47127	1.99253	1.61525	-0.579811	-4.28025	-4.28025		I		III	33.7441	1.49671
YOR294W	RRS1	Essential protein that binds ribosomal protein L11; required for nuclear export of the 60S pre-ribosomal subunit during ribosome biogenesis; localizes to the nucleolus and in foci along nuclear periphery; cooperates with Ebp2p and Mps3p to mediate telomere clustering by binding Sir4p, but is not involved in telomere tethering; mouse homolog shows altered expression in Huntington's disease model m…	II	2.67402	1.76538	1.19986	0.175875	-0.270645	-1.23339	-2.50567	-4.28025		I	II	277.874	12.325
YDL160C	DHH1	Cytoplasmic DExD/H-box helicase, stimulates mRNA decapping; coordinates distinct steps in mRNA function and decay, interacts with both the decapping and deadenylase complexes, role in translational repression, mRNA decay, and processing body dynamics; may have a role in mRNA export; C-terminus of Dhh1p interacts with Ngr1p and promotes POR1, but not EDC1 mRNA decay; forms cytoplasmic foci upon DN…	II	2.53268	1.95881	1.37895	1.01118	0.855753	-1.30889	-2.28025	-4.28025			II	169.818	7.53221
YKL056C	TMA19	Protein that associates with ribosomes; homolog of translationally controlled tumor protein; green fluorescent protein (GFP)-fusion protein localizes to the cytoplasm and relocates to the mitochondrial outer surface upon oxidative stress	II	4.53643	2.28175	1.22844	-0.333391	-0.53379	-3.00442	-3.00442	-3.00442		IV	II	3453.46	153.177
YLR300W	EXG1	Major exo-1,3-beta-glucanase of the cell wall; involved in cell wall beta-glucan assembly; exists as three differentially glycosylated isoenzymes; EXG1 has a paralog, SPR1, that arose from the whole genome duplication	II	3.41363	2.67826	1.87702	0.639286	-1.13576	-2.50567	-3.28025			II	II	470.637	20.8749
YDR335W	MSN5	Karyopherin; involved in nuclear import and export of proteins, including import of replication protein A and export of Far1p and transcription factors Swi5p, Swi6p, Msn2p, and Pho4p; required for re-export of mature tRNAs after their retrograde import from the cytoplasm; exportin-5 homolog	II	2.33075	1.50818	1.44355	0.891938	0.071757	-1.95832					III	30.0065	1.33093
YGL054C	ERV14	COPII-coated vesicle protein; involved in vesicle formation and incorporation of specific secretory cargo; required for the delivery of bud-site selection protein Axl2p to cell surface; related to Drosophila cornichon; ERV14 has a paralog, ERV15, that arose from the whole genome duplication	II	2.59406	1.8502	1.04371	0.703206	0.588326	-2.28025					II	156.884	6.95856
YPR017C	DSS4	Guanine nucleotide dissociation stimulator for Sec4p; functions in the post-Golgi secretory pathway; binds zinc, found both on membranes and in the cytosol	II	2.24262	2.05219	1.61906	0.345342	-0.032324	-0.032324	-4.28025				III	32.4724	1.4403
YNL015W	PBI2	Cytosolic inhibitor of vacuolar proteinase B (PRB1); required for efficient vacuole inheritance; with thioredoxin forms protein complex LMA1, which assists in priming SNARE molecules and promotes vacuole fusion; protein abundance increases in response to DNA replication stress	II	2.7836	2.31498	1.45909	0.866297	-1.4729	-1.69529					II	81.8966	3.6325
YNL138W	SRV2	CAP (cyclase-associated protein); N-terminus binds adenylate cyclase and facilitates activation by RAS; N-terminus forms novel hexameric star-shaped shuriken structures that directly catalyze cofilin-mediated severing of actin filaments; C-terminus, in physically and genetically separate activity, binds and recycles cofilin bound, ADP-actin monomers, facilitating regulation of actin dynamics and …	II	3.65282	2.16717	1.38932	1.02272						IV	III	173.694	7.70413
YMR194W	RPL36A	Ribosomal 60S subunit protein L36A; N-terminally acetylated; binds to 5.8 S rRNA; homologous to mammalian ribosomal protein L36, no bacterial homolog; RPL36A has a paralog, RPL36B, that arose from the whole genome duplication	II	2.97518	2.06619	1.24666	-0.280251	-1.11033	-2.28025	-3.28025	-3.28025		IV	II	426.761	18.9289
YDR087C	RRP1	Essential evolutionarily conserved nucleolar protein; necessary for biogenesis of 60S ribosomal subunits and for processing of pre-rRNAs to mature rRNA; associated with several distinct 66S pre-ribosomal particles	II	3.56188	2.71349	1.85691	1.08502	0.034395					IV	II	159.079	7.05588
YLR212C	TUB4	Gamma-tubulin; involved in nucleating microtubules from both the cytoplasmic and nuclear faces of the spindle pole body; protein abundance increases in response to DNA replication stress	II	3.09953	2.18627	1.66071	1.57804	-2.13576						III	28.9199	1.28273
YDL002C	NHP10	Non-essential INO80 chromatin remodeling complex subunit; preferentially binds DNA ends, protecting them from exonucleatic cleavage; deletion affects telomere maintenance via recombination; related to mammalian high mobility group proteins	II	3.80005	2.33926	1.70206	1.37589	0.73638	-0.197068	-3.28025	-4.28025			II	52.8699	2.34503
YDR308C	SRB7	Subunit of the RNA polymerase II mediator complex; associates with core polymerase subunits to form the RNA polymerase II holoenzyme; essential for transcriptional regulation; target of the global repressor Tup1p	II	3.72573	2.31891	1.69948	1.54466	-1.4729				III	II	II	52.7011	2.33754
YOR323C	PRO2	Gamma-glutamyl phosphate reductase; catalyzes the second step in proline biosynthesis	II	2.73701	1.89508	1.29046	0.889674					IV	III	II	242.153	10.7406
YLR021W	IRC25	Component of a heterodimeric Poc4p-Irc25p chaperone; involved in assembly of alpha subunits into the 20S proteasome; may regulate formation of proteasome isoforms with alternative subunits under different conditions	II	3.64067	3.02462	2.15044	1.25157	-1.41946	-1.7336	-3.77296				II	46.8205	2.07671
YEL020W-A	TIM9	Essential protein of the mitochondrial intermembrane space; forms a complex with Tim10p (TIM10 complex) that delivers hydrophobic proteins to the TIM22 complex for insertion into the inner membrane	II	2.75379	2.28884	2.18093	0.186173	-1.45103				I		III	94.6532	4.19831
YKR095W	MLP1	Myosin-like protein associated with the nuclear envelope; nuclear basket protein that connects the nuclear pore complex with the nuclear interior; involved with Tel1p in telomere length control; involved with Pml1p and Pml39p in nuclear retention of unspliced mRNAs; MLP1 has a paralog, MLP2, that arose from the whole genome duplication	II	3.15925	2.75435	1.47749	0.329822	0.17918					II	II	55.5197	2.46256
YMR076C	PDS5	Cohesion maintenance factor; involved in sister chromatid condensation and cohesion; colocalizes with cohesin on chromosomes; performs its cohesin maintenance function in pre-anaphase cells by protecting the integrity of the cohesion complex; also required during meiosis; relocalizes to the cytosol in response to hypoxia	II	2.89709	2.26873	1.61784	1.49565	-0.472896	-3.28025				III	IV	27.3381	1.21257
YBR009C	HHF1	Histone H4; core histone protein required for chromatin assembly and chromosome function; one of two identical histone proteins (see also HHF2); contributes to telomeric silencing; N-terminal domain involved in maintaining genomic integrity	II	2.93079	2.42315	1.88019	1.18782	-0.076942	-0.82082				III	II	847.622	37.596
YMR033W	ARP9	Component of both the SWI/SNF and RSC chromatin remodeling complexes; actin-related protein involved in transcriptional regulation	II	2.92724	1.59096	1.5555	0.851361	-0.192788	-0.373361	-4.28025		IV	II	II	60.7212	2.69327
YMR044W	IOC4	Member of a complex (Isw1b) with Isw1p and Ioc2p; interacts directly with H3K36me3 nucleosomes through its PWWP domain to recruit the Isw1b complex to open reading frames in a Set2p-dependent manner; Isw1b exhibits nucleosome-stimulated ATPase activity and acts within coding regions to coordinate transcription elongation with termination and processing	II	3.89231	3.14933	2.69731	-0.393466	-0.393466	-3.77296	-3.77296			II	II	21.4135	0.94979
YPL011C	TAF3	TFIID subunit (47 kDa); involved in promoter binding and RNA polymerase II transcription initiation	II	3.03662	2.79676	1.43183									36.1251	1.60232
YDR064W	RPS13	Protein component of the small (40S) ribosomal subunit; homologous to mammalian ribosomal protein S13 and bacterial S15	II	2.88816	1.92207	1.17236	0.196399	-0.766586	-3.00442				IV	II	1994.6	88.47
YMR112C	MED11	Subunit of the RNA polymerase II mediator complex; associates with core polymerase subunits to form the RNA polymerase II holoenzyme; essential protein	II	3.85123	2.50111	0.673945	0.626639	0.474636						II	39.2664	1.74165
YMR194C-B	CMC4	Protein that localizes to the mitochondrial intermembrane space; localizes via the Mia40p-Erv1p system; contains twin cysteine-x(9)-cysteine motifs	II	2.79441	2.56863	2.40042	1.38772	0.923058	-0.076942	-3.00442				III	4.62632	0.205199
YBR084C-A	RPL19A	Ribosomal 60S subunit protein L19A; rpl19a and rpl19b single null mutations result in slow growth, while the double null mutation is lethal; homologous to mammalian ribosomal protein L19, no bacterial homolog; RPL19A has a paralog, RPL19B, that arose from the whole genome duplication	II	2.34148	1.69227	0.782448	0.443383	-0.82082	-1.4729	-4.28025		IV		II	1318.39	58.4767
YMR049C	ERB1	Constituent of 66S pre-ribosomal particles; forms a complex with Nop7p and Ytm1p that is required for maturation of the large ribosomal subunit; required for maturation of the 25S and 5.8S ribosomal RNAs; homologous to mammalian Bop1	II	3.27052	2.81187	1.76675	1.21361	0.373006					I	II	153.02	6.78716
YDL031W	DBP10	Putative ATP-dependent RNA helicase of the DEAD-box protein family; constituent of 66S pre-ribosomal particles; essential protein involved in ribosome biogenesis	II	3.74615	1.8263	1.45365	0.606534						I	IV	109.935	4.87611
YLR055C	SPT8	Subunit of the SAGA transcriptional regulatory complex; not present in SAGA-like complex SLIK/SALSA; required for SAGA-mediated inhibition at some promoters	II	3.54574	2.3811	1.8686	0.556926	0.22704	-1.188	-1.77296	-1.77296			II	18.0129	0.798958
YLR399C	BDF1	Protein involved in transcription initiation; functions at TATA-containing promoters; associates with the basal transcription factor TFIID; contains two bromodomains; corresponds to the C-terminal region of mammalian TAF1; redundant with Bdf2p; BDF1 has a paralog, BDF2, that arose from the whole genome duplication	II	2.11853	1.4706	1.26969	1.19313	0.527423						II	89.257	3.95897
YGR081C	SLX9	Protein required for pre-rRNA processing; associated with the 90S pre-ribosome and 43S small ribosomal subunit precursor; interacts with U3 snoRNA; deletion mutant has synthetic fitness defect with an sgs1 deletion mutant	II	3.52556	2.98818	2.28012	1.43062	0.474967	-1.77296	-3.77296	-3.77296		III	II	99.2968	4.40427
YEL061C	CIN8	Kinesin motor protein; involved in mitotic spindle assembly and chromosome segregation	II	3.06295	1.67277	1.16363	0.583038	0.311123						II	28.8969	1.28171
YDR060W	MAK21	Constituent of 66S pre-ribosomal particles; required for large (60S) ribosomal subunit biogenesis; acts as part of a Mak21p-Noc2p-Rrp5p module that associates with nascent pre-rRNA during transcription and has a role in bigenesis of the large ribosomal subunit; involved in nuclear export of pre-ribosomes; required for maintenance of dsRNA virus; homolog of human CAATT-binding protein	II	2.22604	1.71036	1.24015	0.329822	0.269503				IV	I	II	183.336	8.13179
YKL038W	RGT1	Glucose-responsive transcription factor; regulates expression of several glucose transporter (HXT) genes in response to glucose; binds to promoters and acts both as a transcriptional activator and repressor; recruits Tup1p/Cyc8p to target gene promoters; RGT1 has a paralog, EDS1, that arose from the whole genome duplication	II	3.88082	2.80012	2.106	0.676574	-0.579811						I	22.1839	0.983962
YDL055C	PSA1	GDP-mannose pyrophosphorylase (mannose-1-phosphate guanyltransferase); synthesizes GDP-mannose from GTP and mannose-1-phosphate in cell wall biosynthesis; required for normal cell wall structure	II	4.00428	2.99153	1.628	0.175875	-0.197068	-1.02804					I	2287.29	101.452
YML081W	TDA9	Transcription factor that regulates acetate production; green fluorescent protein (GFP)-fusion protein localizes to the nucleus; null mutant is sensitive to expression of the top1-T722A allele; not an essential gene; TDA9 has a paralog, RSF2, that arose from the whole genome duplication	II	3.46671	2.31657	1.0903	0.336123	-0.373361	-2.28025					II	43.4942	1.92917
YOL027C	MDM38	Mitochondrial protein; forms a complex with Mba1p to facilitate recruitment of mRNA-specific translational activators to ribosomes; roles in protein export and K+/H+ exchange; human ortholog Letm1 implicated in Wolf-Hirschhorn syndrome	II	2.03223	1.58304	1.48034	1.04168	1.04168	0.929202	-4.28025		I	II	III	81.8506	3.63046
YPR019W	MCM4	Essential helicase component of heterohexameric MCM2-7 complexes; MCM2-7 complexes bind pre-replication complexes on DNA and melt DNA prior to replication; forms an Mcm4p-6p-7p subcomplex; shows nuclear accumulation in G1; homolog of S. pombe Cdc21p	II	2.78421	1.87918	1.06441	0.69111	-1.16164	-1.63314					II	44.3144	1.96555
YER117W	RPL23B	Ribosomal 60S subunit protein L23B; homologous to mammalian ribosomal protein L23 and bacterial L14; RPL23B has a paralog, RPL23A, that arose from the whole genome duplication	II	3.53562	2.2351	1.2549	0.071757	-1.4729	-1.95832	-1.95832	-3.28025		IV	II	864.901	38.3624
YLR044C	PDC1	Major of three pyruvate decarboxylase isozymes; key enzyme in alcoholic fermentation; decarboxylates pyruvate to acetaldehyde; involved in amino acid catabolism; subject to glucose-, ethanol-, and autoregulation; activated by phosphorylation in response to glucose levels; N-terminally propionylated in vivo	II	3.55772	2.94566	1.33	-0.920711	-1.13576	-2.00442	-2.77296		III	IV	III	13857.1	614.627
YHL023C	NPR3	Subunit of the Iml1p/SEACIT complex; SEACIT (Iml1p-Npr2p-Npr3p) is a subcomplex of SEAC, a coatomer-related complex that associates dynamically with the vacuole; Npr3p may have a structural or regulatory role, supporting Iml1p function as a GAP for the Rag family GTPase Gtr1p, and leading to inhibition of TORC1 signaling in response to amino acid deprivation; SEACIT is required for non-nitrogen-s…	II	2.45424	2.00037	0.923058	0.243311	0.112066					IV	III	19.9168	0.883404
YOL021C	DIS3	Exosome core complex catalytic subunit; has both endonuclease and 3'-5' exonuclease activity; involved in 3'-5' RNA processing and degradation in both the nucleus and the cytoplasm; role in degradation of tRNAs; has similarity to E. coli RNase R and to human DIS3; mutations in Dis3p corresponding to human mutations implicated in multiple myeloma cause phenotypes suggesting impaired exosome functi…	II	2.6419	1.47916	1.37301	0.22704	0.13393				III	I	III	84.3615	3.74183
YLR009W	RLP24	Essential protein required for ribosomal large subunit biogenesis; associated with pre-60S ribosomal subunits; stimulates the ATPase activity of Afg2p, which is required for release of Rlp24p from the pre-60S particle; has similarity to Rpl24Ap and Rpl24Bp	II	2.6096	2.35002	1.88879	0.463501	-0.247178	-0.539213			IV	I	II	336.54	14.9271
YPR091C	NVJ2	Lipid-binding ER protein, enriched at nucleus-vacuolar junctions (NVJ); may be involved in sterol metabolism or signaling at the NVJ; contains a synaptotagmin-like-mitochondrial-lipid binding protein (SMP) domain; binds phosphatidylinositols and other lipids in a large-scale study; may interact with ribosomes, based on co-purification experiments	II	2.16717	1.52856	1.14791	0.603774	0.532601						III	45.178	2.00386
YKL180W	RPL17A	Ribosomal 60S subunit protein L17A; copurifies with the Dam1 complex (aka DASH complex); homologous to mammalian ribosomal protein L17 and bacterial L22; RPL17A has a paralog, RPL17B, that arose from the whole genome duplication; protein abundance increases in response to DNA replication stress	II	3.2255	2.18525	0.955687	0.071757	-0.766586	-2.28025	-4.28025	-4.28025			II	1518.73	67.3627
YDR174W	HMO1	Chromatin associated high mobility group (HMG) family member; involved in compacting, bending, bridging and looping DNA; rDNA-binding component that regulates transcription from RNA polymerase I promoters; regulates start site selection of ribosomal protein genes via RNA polymerase II promoters; role in genome maintenance; associates with a 5'-3' DNA helicase and Fpr1p, a prolyl isomerase; reloca…	II	2.6255	1.78597	0.943597	0.018811	-1.13576	-2.28025	-2.69529				II	245.225	10.8769
YPR108W	RPN7	Essential non-ATPase regulatory subunit of the 26S proteasome; similar to another S. cerevisiae regulatory subunit, Rpn5p, as well as to mammalian proteasome subunits	II	3.29803	2.80334	2.33603	0.807212	-0.958323	-1.11033	-4.28025			III	III	148.968	6.60742
YNL182C	IPI3	Component of the Rix1 complex and pre-replicative complexes (pre-RCs); required for processing of ITS2 sequences from 35S pre-rRNA; component of the pre-60S ribosomal particle with the dynein-related AAA-type ATPase Mdn1p; required for pre-RC formation and maintenance during DNA replication licensing; highly conserved protein which contains several WD40 motifs; IPI3 is an essential gene; other me…	II	3.29089	1.75269	1.05881	0.007241	-0.958323					I	III	127.367	5.64931
YOR095C	RKI1	Ribose-5-phosphate ketol-isomerase; catalyzes the interconversion of ribose 5-phosphate and ribulose 5-phosphate in the pentose phosphate pathway; participates in pyridoxine biosynthesis	II	3.958	3.11082	2.67219	0.775645	-0.489192	-1.4729					I	161.686	7.17151
YER131W	RPS26B	Protein component of the small (40S) ribosomal subunit; homologous to mammalian ribosomal protein S26, no bacterial homolog; RPS26B has a paralog, RPS26A, that arose from the whole genome duplication	II	3.41253	1.95062	1.03029	-0.206195	-0.981189	-2.00442	-3.00442	-3.77296	IV	IV	II	2605.74	115.577
YDR301W	CFT1	RNA-binding subunit of the mRNA cleavage and polyadenylation factor; involved in poly(A) site recognition and required for both pre-mRNA cleavage and polyadenylation, 51% sequence similarity with mammalian AAUAA-binding subunit of CPSF	II	3.40941	2.10502	1.32852	1.21019	-1.28025	-1.4729					II	30.4332	1.34986
YOL004W	SIN3	Component of both the Rpd3S and Rpd3L histone deacetylase complexes; involved in transcriptional repression and activation of diverse processes, including mating-type switching and meiosis; involved in the maintenance of chromosomal integrity	II	3.4971	1.92207	1.73161	0.345342	-0.110326	-3.28025				IV	II	78.6202	3.48717
YBL021C	HAP3	Subunit of the Hap2p/3p/4p/5p CCAAT-binding complex; complex is heme-activated and glucose-repressed; complex is a transcriptional activator and global regulator of respiratory gene expression; contains sequences contributing to both complex assembly and DNA binding	II	5.13676	3.69078	1.69472	-0.451032	-0.603035				IV		II	20.2658	0.898885
YMR241W	YHM2	Citrate and oxoglutarate carrier protein; exports citrate from and imports oxoglutarate into the mitochondrion, causing net export of NADPH reducing equivalents; also associates with mt nucleoids and has a role in replication and segregation of the mt genome	II	3.93309	3.00811	2.44484	0.916887	-0.645498	-1.95832	-4.28025			IV	II	199.736	8.85922
YML028W	TSA1	Thioredoxin peroxidase; acts as both ribosome-associated and free cytoplasmic antioxidant; self-associates to form high-molecular weight chaperone complex under oxidative stress; chaperone activity essential for growth in zinc deficiency; required for telomere length maintenance; protein abundance increases, forms cytoplasmic foci during DNA replication stress; TSA1 has a paralog, TSA2, that aros…	II	3.09675	2.73869	1.16883	0.731608	0.569886	-0.122984	-2.00442		III	III	III	2142.28	95.0199
YBL006C	LDB7	Component of the RSC chromatin remodeling complex; interacts with Rsc3p, Rsc30p, Npl6p, and Htl1p to form a module important for a broad range of RSC functions	II	4.05578	2.28252	0.927238	-0.056403	-0.170545	-0.82082	-4.28025			II	II	65.1561	2.88998
YPL131W	RPL5	Ribosomal 60S subunit protein L5; homologous to mammalian ribosomal protein L5 and bacterial L18; binds 5S rRNA and is required for 60S subunit assembly	II	4.39144	3.38522	1.49846	-0.122984	-0.579811	-4.28025					II	4759.38	211.101
YBR060C	ORC2	Subunit of the origin recognition complex (ORC); ORC directs DNA replication by binding to replication origins and is also involved in transcriptional silencing; interacts with Spp1p and with trimethylated histone H3; phosphorylated by Cdc28p	II	3.80146	2.48518	2.31263	0.168832	-0.110326	-0.110326	-4.28025				II	34.3492	1.52355
YPL004C	LSP1	Eisosome core component; eisosomes are large immobile patch structures at the cell cortex associated with endocytosis; phosphorylated on Thr233 upon Pkc1p hyperactivation in a Slt2p MAPK-dependent fashion; null mutants show activation of Pkc1p/Ypk1p stress resistance pathways; member of the BAR domain family	II	3.74657	3.45739	2.53599	0.345342	-0.219727	-4.28025					II	161.717	7.17288
YNL002C	RLP7	Nucleolar protein similar to large ribosomal subunit L7 proteins; constituent of 66S pre-ribosomal particles; plays an essential role in processing of precursors to the large ribosomal subunit RNAs; binds junction of ITS2 and ITS2-proximal stem between the 3' end of 5.8S rRNA and the 5' end of 25S rRNA	II	2.83555	2.39821	1.62422	1.10665	-0.597368	-2.13576	-3.77296	-3.77296		I	II	232.56	10.3151
YJL122W	ALB1	Shuttling pre-60S factor; involved in the biogenesis of ribosomal large subunit; interacts directly with Arx1p; responsible for Tif6p recycling defects in absence of Rei1p	III	3.16987	1.89621	0.354502	-1.69529					III	I	II	233.274	10.3468
YDR389W	SAC7	GTPase activating protein (GAP) for Rho1p; regulator of a Tor2p-mediated, Rho1p GTPase switch that controls organization of the actin cytoskeleton; negative regulator of the RHO1-PKC1-MAPK cell integrity (CWI) and membrane fluidity homeostasis signaling pathways; potential Cdc28p substrate; SAC7 has a paralog, BAG7, that arose from the whole genome duplication	III	2.57585	1.94566	1.0419	-2.28025	-2.28025	-2.28025					II	47.3774	2.10141
YDR325W	YCG1	Subunit of the condensin complex; required for establishment and maintenance of chromosome condensation, chromosome segregation and chromatin binding of the condensin complex; required for clustering of tRNA genes at the nucleolus; required for replication slow zone (RSZ) breakage following Mec1p inactivation	III	2.48943	2.00037	0.91069	0.569886	-2.00442	-4.28025				III	II	26.037	1.15486
YBR081C	SPT7	Subunit of the SAGA transcriptional regulatory complex; involved in proper assembly of the complex; also present as a C-terminally truncated form in the SLIK/SALSA transcriptional regulatory complex	III	2.67277	1.84254	1.61906	-0.615141	-3.77296	-3.77296				IV	III	24.2949	1.07759
YGL123W	RPS2	Protein component of the small (40S) subunit; essential for control of translational accuracy; phosphorylation by C-terminal domain kinase I (CTDK-I) enhances translational accuracy; methylated on one or more arginine residues by Hmt1p; homologous to mammalian ribosomal protein S2 and bacterial S5	III	3.28247	2.37048	1.1301	-0.786586	-3.00442	-3.00442	-4.28025		IV	III	III	4878.04	216.364
YKL009W	MRT4	Protein involved in mRNA turnover and ribosome assembly; required at post-transcriptional step for efficient retrotransposition; localizes to the nucleolus	III	3.24557	2.30092	0.698323	-0.806868	-2.188	-2.188				II	II	299.343	13.2773
YHR127W		Protein of unknown function; localizes to the nucleus; required for asymmetric localization of Kar9p during mitosis	III	4.11875	2.9462	1.61906	-2.50567							II	43.4498	1.9272
YCL009C	ILV6	Regulatory subunit of acetolactate synthase; acetolactate synthase catalyzes the first step of branched-chain amino acid biosynthesis; enhances activity of the Ilv2p catalytic subunit, localizes to mitochondria	III	2.80018										III	337.05	14.9497
YCL025C	AGP1	Low-affinity amino acid permease with broad substrate range; involved in uptake of asparagine, glutamine, and other amino acids; expression regulated by SPS plasma membrane amino acid sensor system (Ssy1p-Ptr3p-Ssy5p); AGP1 has a paralog, GNP1, that arose from the whole genome duplication	III	1.89721	1.34552	1.31601	0.981927	-3.77296						II	11.2954	0.501004
YNL227C	JJJ1	Co-chaperone that stimulates the ATPase activity of Ssa1p; required for a late step of ribosome biogenesis; associated with the cytosolic large ribosomal subunit; contains a J-domain; mutation causes defects in fluid-phase endocytosis	III	1.03804	0.791647	0.791647	-0.224087	-0.224087	-4.28025	-4.28025		IV			26.9705	1.19627
YLR405W	DUS4	Dihydrouridine synthase; member of a widespread family of conserved proteins including Smm1p, Dus1p, and Dus3p	III	3.30877	1.88879	1.09773	-0.430114	-2.13576						II	29.2342	1.29667
YOL068C	HST1	NAD(+)-dependent histone deacetylase; essential subunit of the Sum1p/Rfm1p/Hst1p complex required for ORC-dependent silencing and mitotic repression; non-essential subunit of the Set3C deacetylase complex; involved in telomere maintenance; HST1 has a paralog, SIR2, that arose from the whole genome duplication	III	2.48452	1.59993	0.842536	-0.2945	-3.00442						II	64.316	2.85271
YHR128W	FUR1	Uracil phosphoribosyltransferase; synthesizes UMP from uracil; involved in the pyrimidine salvage pathway	III	3.76136	2.88184	-0.032324	-2.28025	-3.28025						II	370.411	16.4295
YNL278W	CAF120	Part of the CCR4-NOT transcriptional regulatory complex; involved in controlling mRNA initiation, elongation, and degradation; CAF120 has a paralog, SKG3, that arose from the whole genome duplication	III	2.49366	0.748104	0.748104	0.086782	-3.00442						II	12.4366	0.551621
YGL122C	NAB2	Nuclear polyadenylated RNA-binding protein; required for nuclear mRNA export and poly(A) tail length control; binds nuclear pore protein Mlp1p; involved in forming export-competent mRNPs in the nucleus; autoregulates mRNA levels; related to human hnRNPs; nuclear localization sequence binds Kap104p; protein abundance increases in response to DNA replication stress	III	4.71403	3.95623	1.75033	-0.472896	-2.28025	-3.28025			IV		II	79.7709	3.53821
YJR104C	SOD1	Cytosolic copper-zinc superoxide dismutase; detoxifies superoxide; stabilizes Yck1p and Yck2p kinases in glucose to repress respiration; phosphorylated by Dun1p, enters nucleus under oxidative stress to promote transcription of stress response genes; human ortholog SOD1 implicated in ALS and complements yeast null; abundance increases under DNA replication stress and during exposure to boric acid…	III	3.34189	2.50111	1.47464	1.33446	-3.28025				II	II	II	1154.46	51.2058
YPL082C	MOT1	Essential protein involved in regulation of transcription; removes Spt15p (TBP) from DNA via its C-terminal ATPase activity; may have a role in ensuring that soluble TBP is available to bind TATA-less promoters; forms a complex with TBP that binds TATA DNA with high affinity but with altered specificity; the Mot1p-Spt15p-DNA ternary complex contains unbent DNA	III	5.05376	4.18422	0.947718	-1.63314						III	II	56.8252	2.52046
YOR296W		Putative protein of unknown function; green fluorescent protein (GFP)-fusion protein localizes to the cytoplasm; expressed during copper starvation; YOR296W is not an essential gene	III	3.03463	1.734	1.66543	-0.139868	-3.77296						III	16.58	0.7354
YBR198C	TAF5	Subunit (90 kDa) of TFIID and SAGA complexes; involved in RNA polymerase II transcription initiation and in chromatin modification	III	2.73995	2.15495	1.39679	-0.333391	-2.28025	-2.28025	-2.69529	-3.28025		IV	II	51.7187	2.29397
YDR451C	YHP1	Homeobox transcriptional repressor; binds Mcm1p and early cell cycle box (ECB) elements of cell cycle regulated genes, thereby restricting ECB-mediated transcription to the M/G1 interval; YHP1 has a paralog, YOX1, that arose from the whole genome duplication	III	2.17495	1.65553	-0.256629	-0.898777	-1.20619	-3.77296				IV	II	28.4903	1.26368
YLL011W	SOF1	Protein required for biogenesis of 40S (small) ribosomal subunit; has similarity to the beta subunit of trimeric G-proteins and the splicing factor Prp4p; essential gene	III	3.30277	2.41512	1.04553	-1.09329	-1.2611	-3.77296			III	I	II	112.164	4.975
YGR037C	ACB1	Acyl-CoA-binding protein; transports newly synthesized acyl-CoA esters from fatty acid synthetase (Fas1p-Fas2p) to acyl-CoA-consuming processes; subject to starvation-induced, Grh1p-mediated unconventional secretion; protein abundance increases in response to DNA replication stress	III	2.67402	1.78935	1.0848	0.651823	-1.84159	-3.00442			III	III	II	863.369	38.2945
YBR025C	OLA1	P-loop ATPase with similarity to human OLA1 and bacterial YchF; identified as specifically interacting with the proteasome; null mutant displays increased translation rate and increased readthrough of premature stop codons; protein abundance increases in response to hydrogen peroxide and to DNA replication stress	III	2.50671	1.95364	1.68372	1.33446	-3.28025	-3.28025			IV		III	799.458	35.4597
YOR206W	NOC2	Protein involved in ribosome biogenesis; forms a nucleolar complex with Mak21p that binds to 90S and 66S pre-ribosomes; forms a nuclear complex with Noc3p that binds to 66S pre-ribosomes; both complexes mediate intranuclear transport of ribosomal precursors; acts as part of a Mak21p-Noc2p-Rrp5p module that associates with nascent pre-rRNA during transcription and has a role in bigenesis of the la…	III	2.58561	1.78814	1.53792	-0.110326	-1.69529					II	II	210.106	9.31918
YCR075W-A		Putative protein of unknown function; identified by homology to Ashbya gossypii; YCR075W-A has a paralog, YNR034W-A, that arose from the whole genome duplication	III	2.05511	0.859879	0.738622	-0.076942	-3.77296	-3.77296				I		51.7693	2.29621
YGL101W		Protein of unknown function; non-essential gene; interacts with the DNA helicase Hpr5p; YGL101W has a paralog, YBR242W, that arose from the whole genome duplication	III	2.00921	1.06061	0.859879	-0.206195	-3.77296	-3.77296	-3.77296			IV	II	79.6302	3.53197
YGL213C	SKI8	Ski complex component and WD-repeat protein; mediates 3'-5' RNA degradation by the cytoplasmic exosome; also required for meiotic double-strand break recombination; null mutants have superkiller phenotype	III	2.16893	2.10133	1.77578	0.626639	-4.28025						II	68.0126	3.01668
YML048W	GSF2	Endoplasmic reticulum (ER) localized integral membrane protein; may promote secretion of certain hexose transporters, including Gal2p; involved in glucose-dependent repression	III	3.11982	1.65924	0.646763	0.112066	-1.4729	-2.69529					II	185.787	8.24052
YBR260C	RGD1	GTPase-activating protein (RhoGAP) for Rho3p and Rho4p; possibly involved in control of actin cytoskeleton organization	III	2.89307	2.45074	1.58054	0.757524	-4.28025	-4.28025	-4.28025			IV	II	30.3534	1.34632
YMR229C	RRP5	RNA binding protein involved in synthesis of both 18S and 5.8S rRNAs; component of both the ribosomal small subunit (SSU) processosome and the 90S preribosome; acts as part of a Mak21p-Noc2p-Rrp5p module that associates with nascent pre-rRNA during transcription and has a role in bigenesis of the large ribosomal subunit; has binding preference for single stranded tracts of U's; relocalizes from n…	III	3.57432	2.46002	1.52321	0.738898	-2.77296					I	III	303.005	13.4397
YAR007C	RFA1	Subunit of heterotrimeric Replication Protein A (RPA); RPA is a highly conserved single-stranded DNA binding protein involved in DNA replication, repair, and recombination; RPA protects against inappropriate telomere recombination, and upon telomere uncapping, prevents cell proliferation by a checkpoint-independent pathway; role in DNA catenation/decatenation pathway of chromosome disentangling; …	III	3.81067	2.31046	1.45365	0.987826	-3.00442					I	III	59.4163	2.63539
YNR060W	FRE4	Ferric reductase; reduces a specific subset of siderophore-bound iron prior to uptake by transporters; expression induced by low iron levels	III	3.08299	1.52451	0.603774	-2.188						III	II	7.6253	0.338218
YKL033W-A		Putative protein of unknown function; similar to uncharacterized proteins from other fungi	III	3.31671	1.72569	1.39217	-1.69529	-4.28025						II	199.429	8.84561
YOL140W	ARG8	Acetylornithine aminotransferase; catalyzes the fourth step in the biosynthesis of the arginine precursor ornithine	III	3.45109	2.57145	0.759734	-1.95832	-1.95832	-2.28025	-2.69529				II	39.6602	1.75911
YBR067C	TIP1	Major cell wall mannoprotein with possible lipase activity; transcription is induced by heat- and cold-shock; member of the Srp1p/Tip1p family of serine-alanine-rich proteins	III	4.63964	3.69559	1.32069	0.04575	-2.13576	-3.77296	-3.77296			IV	II	291.008	12.9076
YPR171W	BSP1	Adapter that links synaptojanins to the cortical actin cytoskeleton; the synaptojanins are Inp52p and Inp53p	III	2.61082	1.8898	0.919109	0.119391	-3.77296						II	27.4388	1.21704
YLR186W	EMG1	Methyltransferase for rRNA; catalyzes methylation of the pseudouridine residue 1191 of 18S rRNA; member of the SPOUT methyltransferase family; required for maturation of 18S rRNA and for 40S ribosomal subunit production independently of methyltransferase activity; forms homodimers; human ortholog is mutated in Bowen-Conradi syndrome, and the equivalent mutation in yeast affects Emg1p dimerization…	III	3.54841	2.93959	1.14094	1.02088	-2.188					I	II	174.309	7.73141
YNL167C	SKO1	Basic leucine zipper transcription factor of the ATF/CREB family; forms a complex with Tup1p and Cyc8p to both activate and repress transcription; cytosolic and nuclear protein involved in osmotic and oxidative stress responses	III	2.25245	1.1964	1.06619	0.030289	-2.33811	-2.33811					II	25.0772	1.11229
YBL023C	MCM2	Protein involved in DNA replication; component of the Mcm2-7 hexameric helicase complex that binds chromatin as a part of the pre-replicative complex; relative distribution to the nucleus increases upon DNA replication stress	III	3.60347	2.43339	1.63688	-0.323426	-1.13576	-4.28025				IV	I	37.6046	1.66794
YGR210C		Putative protein of unknown function; green fluorescent protein (GFP)-fusion protein localizes to the cytoplasm	III	3.01887	2.03234	1.62679	-1.188	-3.77296						II	84.6669	3.75537
YKL068W	NUP100	FG-nucleoporin component of central core of the nuclear pore complex; contributes directly to nucleocytoplasmic transport and maintenance of the nuclear pore complex (NPC) permeability barrier and is involved in gene tethering at the nuclear periphery; NUP100 has a paralog, NUP116, that arose from the whole genome duplication	III	3.85917	2.9355	2.39457	0.193132	-4.28025					III	II	70.1991	3.11366
YDR502C	SAM2	S-adenosylmethionine synthetase; catalyzes transfer of the adenosyl group of ATP to the sulfur atom of methionine; comparative analysis suggests that a mitochondrially targeted form may result from translation starting at a non-canonical codon upstream of the annotated start codon	III	3.68077	2.09041	0.755039	-1.23339	-3.28025				IV		II	188.511	8.36136
YDL198C	GGC1	Mitochondrial GTP/GDP transporter; essential for mitochondrial genome maintenance; has a role in mitochondrial iron transport; member of the mitochondrial carrier family	III	2.57914	2.15054	0.857817	-0.170545	-1.59737				IV		II	57.5642	2.55324
YDL075W	RPL31A	Ribosomal 60S subunit protein L31A; associates with karyopherin Sxm1p; loss of both Rpl31p and Rpl39p confers lethality; homologous to mammalian ribosomal protein L31, no bacterial homolog; RPL31A has a paralog, RPL31B, that arose from the whole genome duplication	III	2.97423	1.89395	0.619058	-1.59737	-2.69529	-2.69529	-2.69529	-2.69529	III	IV	II	1498.37	66.4597
YLR448W	RPL6B	Ribosomal 60S subunit protein L6B; binds 5.8S rRNA; homologous to mammalian ribosomal protein L6, no bacterial homolog; RPL6B has a paralog, RPL6A, that arose from the whole genome duplication	III	2.00131	1.23341	0.243311	-1.11033	-2.69529	-2.69529	-3.28025	-3.28025			II	1166.52	51.7408
YEL032W	MCM3	Protein involved in DNA replication; component of the Mcm2-7 hexameric helicase complex that binds chromatin as a part of the pre-replicative complex	III	3.04037	2.34534	1.82168	0.626639	-4.28025						II	63.1082	2.79914
YBL004W	UTP20	Component of the small-subunit (SSU) processome; SSU processome is involved in the biogenesis of the 18S rRNA	III	3.26965	2.87447	1.04168	-0.695289	-4.28025	-4.28025				I	II	145.368	6.44775
YKL058W	TOA2	TFIIA small subunit; involved in transcriptional activation, acts as antirepressor or as coactivator; required, along with Toa1p, for ribosomal protein gene transcription in vivo; homologous to smallest subunit of human and Drosophila TFIIA; protein abundance increases in response to DNA replication stress	III	2.56073	2.15495	0.068196	-0.338109	-3.00442	-3.77296					II	99.8266	4.42778
YGR282C	BGL2	Endo-beta-1,3-glucanase; major protein of the cell wall, involved in cell wall maintenance; involved in incorporation of newly synthesized mannoprotein molecules into the cell wall	III	2.84812	2.36913	1.54753	-0.157464	-3.77296				IV	IV	II	743.793	32.9907
YER056C-A	RPL34A	Ribosomal 60S subunit protein L34A; homologous to mammalian ribosomal protein L34, no bacterial homolog; RPL34A has a paralog, RPL34B, that arose from the whole genome duplication	III	3.60247	3.07503	0.408623	-1.30889	-2.33811	-2.33811	-4.28025		IV	IV	II	934.198	41.436
YPL210C	SRP72	Core component of the signal recognition particle (SRP); the SRP is a ribonucleoprotein (RNP) complex that functions in targeting nascent secretory proteins to the endoplasmic reticulum (ER) membrane	III	2.74567	2.14432	1.75615	-1.69529	-1.69529				IV	II	II	101.965	4.52264
YKR057W	RPS21A	Protein component of the small (40S) ribosomal subunit; homologous to mammalian ribosomal protein S21, no bacterial homolog; RPS21A has a paralog, RPS21B, that arose from the whole genome duplication	III	2.77278	1.96672	0.859879	-0.714318	-1.30889	-3.00442	-3.77296			III	II	670.993	29.7617
YMR290C	HAS1	ATP-dependent RNA helicase; involved in the biogenesis of 40S and 60S ribosome subunits; localizes to both the nuclear periphery and nucleolus; highly enriched in nuclear pore complex fractions; constituent of 66S pre-ribosomal particles	III	3.46308	1.90957	0.764143	0.243311					IV	I	II	251.524	11.1563
YDR165W	TRM82	Catalytic subunit of a tRNA methyltransferase complex; Trm8p and Trm82p comprise an enzyme that catalyzes a methyl-transfer from S-adenosyl-l-methionine to the N(7) atom of guanine at position 46 in tRNA; Trm8 lacks catalytic activity if not bound to Trm82p; relocalizes to the cytosol in response to hypoxia	III	2.63049	1.562	0.775645	0.168832	-2.00442	-3.28025	-3.28025	-3.28025			II	145.328	6.44599
YCR028C-A	RIM1	ssDNA-binding protein essential for mitochondrial genome maintenance; involved in mitochondrial DNA replication	III	4.43177	3.26022	2.18361	0.007241	-2.50567						II	187.037	8.29599
YOL158C	ENB1	Endosomal ferric enterobactin transporter; expressed under conditions of iron deprivation; member of the major facilitator superfamily; expression is regulated by Rcs1p and affected by chloroquine treatment	III	4.37996	3.10182	-0.363116	-1.88405	-2.188						II	52.5961	2.33288
YKR060W	UTP30	Putative subunit of U3-containing 90S preribosome complex; complex is involved in production of 18S rRNA and assembly of small ribosomal subunit	III	1.8751	1.21019	0.849287	-1.63314	-2.50567	-2.50567	-4.28025				II	62.4792	2.77125
YMR316W	DIA1	Protein of unknown function; involved in invasive and pseudohyphal growth; green fluorescent protein (GFP)-fusion protein localizes to the cytoplasm in a punctate pattern	III	2.49632	1.57773	0.849032	0.363605	-2.69529						II	44.0418	1.95346
YER056C	FCY2	Purine-cytosine permease; mediates purine (adenine, guanine, and hypoxanthine) and cytosine accumulation; relative distribution to the vacuole increases upon DNA replication stress	III	3.9728	2.65679	1.75158	-1.13576	-2.77296	-2.77296	-3.77296			III	II	230.405	10.2195
YKR042W	UTH1	Mitochondrial inner membrane protein; role in mitophagy is disputed; implicated in cell wall biogenesis, the oxidative stress response, life span during starvation, and cell death; SUN family member; UTH1 has a paralog, NCA3, that arose from the whole genome duplication	III	2.35833	1.60116	0.46621	-1.38856	-3.00442	-4.28025					II	723.21	32.0777
YGR187C	HGH1	Nonessential protein of unknown function; predicted to be involved in ribosome biogenesis; green fluorescent protein (GFP)-fusion protein localizes to the cytoplasm; similar to mammalian BRP16 (Brain protein 16); relative distribution to the nucleus increases upon DNA replication stress	III	3.90761	3.07464	1.73876	-0.139868	-3.28025					II	II	64.7171	2.87051
YLR425W	TUS1	Guanine nucleotide exchange factor (GEF) that modulate Rho1p activity; involved in the cell integrity signaling pathway; interacts with Rgl1p; localization of Tus1p to the bed neck is regulated by Rgl1p; multicopy suppressor of tor2 mutation and ypk1 ypk2 double mutation; potential Cdc28p substrate	III	3.05876	2.48385	1.21341	-1.88405	-3.00442	-3.00442	-3.77296	-3.77296			II	12.5082	0.554799
YBR247C	ENP1	Protein associated with U3 and U14 snoRNAs; required for pre-rRNA processing and 40S ribosomal subunit synthesis; localized in the nucleus and concentrated in the nucleolus	III	3.29494	2.31507	1.03052	0.220243	-1.20619	-3.77296				I	IV	129.123	5.72723
YKR059W	TIF1	Translation initiation factor eIF4A; DEA(D/H)-box RNA helicase that couples ATPase activity to RNA binding and unwinding; forms a dumbbell structure of two compact domains connected by a linker; interacts with eIF4G; protein abundance increases in response to DNA replication stress; TIF1 has a paralog, TIF2, that arose from the whole genome duplication	III	2.19477	1.31281	0.37589	-0.806868	-1.09329	-3.28025	-3.28025	-3.28025			III	291.514	12.93
YPL094C	SEC62	Essential subunit of Sec63 complex; with Sec61 complex, Kar2p/BiP and Lhs1p forms a channel competent for SRP-dependent and post-translational SRP-independent protein targeting and import into the ER; cotranslationally N-acetylated by NatA; other members are Sec63p, Sec66p, and Sec72p	III	3.27124	2.95983	1.80734	-2.69529	-2.69529	-2.69529	-2.69529	-4.28025	II	IV	II	164.355	7.2899
YDR404C	RPB7	RNA polymerase II subunit B16; forms dissociable heterodimer with Rpb4p; Rpb4/7 dissociates from RNAPII as Ser2 CTD phosphorylation increases; Rpb4/7 regulates cellular lifespan via mRNA decay process; involved in recruitment of 3'-end processing factors to transcribing RNA polymerase II complex, export of mRNA to cytoplasm under stress conditions; also involved in translation initiation	III	3.42215	1.78027	0.41459	-1.02804	-1.53921						II	107.237	4.75648
YLR033W	RSC58	Component of the RSC chromatin remodeling complex; RSC functions in transcriptional regulation and elongation, chromosome stability, and establishing sister chromatid cohesion; involved in telomere maintenance	III	1.82393	1.46908	1.0903	0.243311	-1.69529	-4.28025					III	44.4701	1.97245
YLR268W	SEC22	R-SNARE protein; assembles into SNARE complex with Bet1p, Bos1p and Sed5p; cycles between the ER and Golgi complex; involved in anterograde and retrograde transport between the ER and Golgi; synaptobrevin homolog	III	2.64751	1.79394	1.11939	-1.59737	-4.28025					IV	IV	95.7313	4.24613
YER049W	TPA1	Fe(II)/2-oxoglutarate-dependent dioxygenase family member; catalyzes the repair of methyl-base lesions in both ss and dsDNA by oxidative demethylation; Poly(rA)-binding protein involved in mRNA poly(A) tail length and mRNA stability; role in translation termination efficiency; interacts with Sup45p (eRF1), Sup35p (eRF3) and Pab1p; similar to human prolyl 4-hydroxylase OGFOD1; binds Fe(II) and 2-o…	III	3.10122	1.66543	0.987594	-0.920711	-1.50567	-2.77296				II	II	151.915	6.73815
YBR158W	AMN1	Protein required for daughter cell separation; multiple mitotic checkpoints, and chromosome stability; contains 12 degenerate leucine-rich repeat motifs; expression is induced by the Mitotic Exit Network (MEN)	III	2.51702	1.2937	-0.445931	-0.786586	-1.4729	-4.28025					II	239.897	10.6406
YLR175W	CBF5	Pseudouridine synthase catalytic subunit of box H/ACA snoRNPs; acts on large and small rRNAs, on snRNA U2, and on some mRNAs; mutations in human ortholog dyskerin cause the disorder dyskeratosis congenita; small nucleolar ribonucleoprotein particles are also known as snoRNPs	III	2.12561	0.750328	0.060606	-0.645498	-0.766586	-1.28025	-4.28025		IV	I	II	373.744	16.5773
YDR091C	RLI1	Essential Fe-S protein; required for ribosome biogenesis, translation initiation/termination; facilitates binding of multifactor complex (MFC) of initiation factors to small ribosomal subunit; Dom34-Hbs1 complex and Rli1p work in dissociating inactive ribosomes, thereby facilitating translation restart; forms complex with Lto1p and Yae1p; dependency on ROS-labile FeS clusters, activity in nuclear…	III	2.86258	2.27357	1.47749	0.46621	-0.388564	-0.597368	-1.95832	-2.28025		III	II	234.747	10.4121
YJR118C	ILM1	Protein of unknown function; may be involved in mitochondrial DNA maintenance; required for slowed DNA synthesis-induced filamentous growth	III	1.40862	1.40862	1.40862	1.40862	0.396965	0.314503	0.314503					96.7605	4.29178
YAL034W-A	MTW1	Essential component of the MIND kinetochore complex; joins kinetochore subunits contacting DNA to those contacting microtubules; critical to kinetochore assembly; complex consists of Mtw1p Including Nnf1p-Nsl1p-Dsn1p (MIND)	III	1.79945	1.79945	1.75615	-0.224087	-0.313529	-0.451032					II	10.6544	0.472574
YIL131C	FKH1	Forkhead family transcription factor; minor role in expression of G2/M phase genes; negatively regulates transcription elongation; positive role in chromatin silencing at HML, HMR; facilitates clustering and activation of early-firing replication origins; binds to recombination enhancer near HML, regulates donor preference during mating-type switching; relocalizes to cytosol in response to hypoxi…	III	2.91701	2.06072	0.508182	-0.958323	-1.11033	-1.11033	-1.69529	-4.28025			II	46.7625	2.07414
YLL036C	PRP19	Splicing factor associated with the spliceosome; contains a U-box, a motif found in a class of ubiquitin ligases, and a WD40 domain; relocalizes to the cytosol in response to hypoxia	III	3.67035	2.02169	0.41459	0.172562	0.034395	-0.187998	-0.313529				II	43.7614	1.94102
YMR072W	ABF2	Mitochondrial DNA-binding protein; involved in mitochondrial DNA replication and recombination, member of HMG1 DNA-binding protein family; activity may be regulated by protein kinase A phosphorylation; ABF2 has a paralog, IXR1, that arose from the whole genome duplication	III	2.02937	1.01696	1.01696	0.285682	-1.53921	-1.77296					II	221.321	9.81662
YDL086W		Putative carboxymethylenebutenolidase; the authentic, non-tagged protein is detected in highly purified mitochondria in high-throughput studies; YDL086W is not an essential gene	III	2.81114	1.02066	-0.898777	-1.59737	-1.95832	-1.95832	-1.95832	-1.95832	IV	IV	IV	83.5717	3.7068
YLR259C	HSP60	Tetradecameric mitochondrial chaperonin; required for ATP-dependent folding of precursor polypeptides and complex assembly; prevents aggregation and mediates protein refolding after heat shock; role in mtDNA transmission; phosphorylated	III	2.71627	1.3879	-0.148639	-0.862667	-0.862667				I		IV	566.234	25.1151
YDR341C		Arginyl-tRNA synthetase; the authentic, non-tagged protein is detected in highly purified mitochondria in high-throughput studies; YDR341C has a paralog, MSR1, that arose from the whole genome duplication	III	1.04371	-0.187998	-0.187998	-0.77296						IV	IV	344.397	15.2756
YBR106W	PHO88	Probable membrane protein; involved in phosphate transport; role in the maturation of secretory proteins; pho88 pho86 double null mutant exhibits enhanced synthesis of repressible acid phosphatase at high inorganic phosphate concentrations	III	2.84747	1.67409	0.809609	-0.323426	-1.33811					III	II	934.533	41.4509
YNL047C	SLM2	Phosphoinositide PI4,5P(2) binding protein, forms a complex with Slm1p; acts downstream of Mss4p in a pathway regulating actin cytoskeleton organization in response to stress; phosphorylated by the TORC2 complex; SLM2 has a paralog, SLM1, that arose from the whole genome duplication	III	1.3998	0.889922	0.333158	0.086782	0.086782	-1.95832	-2.28025	-4.28025			III	17.0401	0.75581
YER048C	CAJ1	Nuclear type II J heat shock protein of the E. coli dnaJ family; contains a leucine zipper-like motif, binds to non-native substrates for presentation to Ssa3p, may function during protein translocation, assembly and disassembly	III	1.91491	1.20148	0.7055	0.345342	-1.77296	-1.77296	-1.77296	-1.77296		III	III	105.348	4.67266
YDR280W	RRP45	Exosome non-catalytic core component; involved in 3'-5' RNA processing and degradation in both the nucleus and the cytoplasm; has similarity to E. coli RNase PH and to human hRrp45p (PM/SCL-75, EXOSC9); protein abundance increases in response to DNA replication stress	III	1.32684	1.0532	-0.110326	-0.110326	-0.82082	-1.4729					II	75.4848	3.34811
YPL254W	HFI1	Adaptor protein required for structural integrity of the SAGA complex; a histone acetyltransferase-coactivator complex that is involved in global regulation of gene expression through acetylation and transcription functions	III	2.3555	1.57804	-0.210514	-0.77296	-0.77296	-0.77296	-0.77296				III	37.1102	1.64601
YGL226C-A	OST5	Zeta subunit of the oligosaccharyltransferase complex of the ER lumen; complex catalyzes asparagine-linked glycosylation of newly synthesized proteins	III	1.90758	1.55804	1.48034	-1.11033					IV	IV	III	115.033	5.10227
YGR192C	TDH3	Glyceraldehyde-3-phosphate dehydrogenase (GAPDH), isozyme 3; involved in glycolysis and gluconeogenesis; tetramer that catalyzes the reaction of glyceraldehyde-3-phosphate to 1,3 bis-phosphoglycerate; detected in the cytoplasm and cell wall; GAPDH-derived antimicrobial peptides secreted by S. cerevisiae are active against a wide variety of wine-related yeasts and bacteria; binds AU-rich RNA	III	2.51359	1.77687	0.37589	-0.352944	-0.451032	-0.603035	-0.603035	-3.77296	IV	IV	III	14607.9	647.928
YKL201C	MNN4	Putative positive regulator of mannosylphosphate transferase Mnn6p; involved in mannosylphosphorylation of N-linked oligosaccharides; expression increases in late-logarithmic and stationary growth phases; coding sequence contains length polymorphisms in different strains; MNN4 has a paralog, YJR061W, that arose from the whole genome duplication	III	1.74225	1.71989	0.057016	0.057016	-1.69529	-2.28025						5.19435	0.230394
YPL198W	RPL7B	Ribosomal 60S subunit protein L7B; required for processing of 27SA3 pre-rRNA to 27SB pre-rRNA during assembly of large ribosomal subunit; depletion leads to a turnover of pre-rRNA; contains a conserved C-terminal Nucleic acid Binding Domain (NDB2); binds to Domain II of 25S and 5.8S rRNAs; homologous to mammalian ribosomal protein L7 and bacterial L30; RPL7B has a paralog, RPL7A, that arose from …	III	0.904467	0.196399	-0.08931	-1.20619	-1.20619					II	IV	68.2106	3.02546
YBR249C	ARO4	3-deoxy-D-arabino-heptulosonate-7-phosphate (DAHP) synthase; catalyzes the first step in aromatic amino acid biosynthesis and is feedback-inhibited by tyrosine or high concentrations of phenylalanine or tryptophan; relative distribution to the nucleus increases upon DNA replication stress	III	2.05601	1.01904	0.474967								IV	409.814	18.1772
YJL168C	SET2	Histone methyltransferase with a role in transcriptional elongation; methylates H3 lysine 36 (H3K36), which suppresses incorporation of acetylated histones and signals for the deacetylation of these histones within transcribed genes; associates with the C-terminal domain(CTD) of Rpo21p; H3K36me3 (trimethylation) requires Spt6p, proline 38 on H3, CTD of Rpo21p, Ctk1p, and C-terminal SRI domain of …	III	1.81506	0.787055	0.603774	-1.02804	-1.77296						II	35.2014	1.56135
YAL011W	SWC3	Protein of unknown function; component of the SWR1 complex, which exchanges histone variant H2AZ (Htz1p) for chromatin-bound histone H2A; required for formation of nuclear-associated array of smooth endoplasmic reticulum known as karmellae	III	2.79838	1.74797	0.17918	0.112066						III	II	14.6497	0.649784
YOR032C	HMS1	bHLH protein with similarity to myc-family transcription factors; overexpression confers hyperfilamentous growth and suppresses the pseudohyphal filamentation defect of a diploid mep1 mep2 homozygous null mutant	III	2.259	1.62285									III	0.324534	0.0143946
YAL009W	SPO7	Putative regulatory subunit of Nem1p-Spo7p phosphatase holoenzyme; regulates nuclear growth by controlling phospholipid biosynthesis, required for normal nuclear envelope morphology, premeiotic replication, and sporulation	III	2.2874	0.108603	0.007241	-1.2611	-1.45103	-1.45103					III	21.6109	0.958546
YBL086C		Protein of unknown function; green fluorescent protein (GFP)-fusion protein localizes to the cell periphery	III	1.21522	0.812002	0.750602	0.750602							III	16.3726	0.726202
YDR440W	DOT1	Nucleosomal histone H3-Lys79 methylase; methylation is required for telomeric silencing, meiotic checkpoint control, and DNA damage response	III	2.49846	1.55407	1.52856	-1.11033	-1.4729	-1.4729	-1.4729				III	25.0453	1.11088
YHR011W	DIA4	Probable mitochondrial seryl-tRNA synthetase; mutant displays increased invasive and pseudohyphal growth	III	3.42971	2.73217	-0.615141	-1.00442	-1.00442	-2.28025	-2.28025	-2.28025	II	III	III	12.0118	0.532778
YER114C	BOI2	Protein implicated in polar growth, functionally redundant with Boi1p; interacts with bud-emergence protein Bem1p; contains an SH3 (src homology 3) domain and a PH (pleckstrin homology) domain; BOI2 has a paralog, BOI1, that arose from the whole genome duplication	III	2.15495	2.02077	1.84045	-0.958323	-1.28025						III	43.4784	1.92847
YOR373W	NUD1	Component of the spindle pole body outer plaque; acts through the mitotic exit network to specify asymmetric spindle pole body inheritance	III	2.47967	1.51228	-0.313529	-0.451032							III	16.9149	0.750253
YBL042C	FUI1	High affinity uridine permease, localizes to the plasma membrane; also mediates low but significant transport of the cytotoxic nucleoside analog 5-fluorouridine; not involved in uracil transport; relative distribution to the vacuole increases upon DNA replication stress	III	2.1706	1.1496	0.569886	0.071757	-1.11033						II	76.9052	3.4111
YNL237W	YTP1	Probable type-III integral membrane protein of unknown function; has regions of similarity to mitochondrial electron transport proteins	III	2.70127	2.24252	1.55931	0.071757	-1.69529	-1.69529	-1.69529				III	1.45599	0.0645798
YOR247W	SRL1	Mannoprotein that exhibits a tight association with the cell wall; required for cell wall stability in the absence of GPI-anchored mannoproteins; has a high serine-threonine content; expression is induced in cell wall mutants; SRL1 has a paralog, SVS1, that arose from the whole genome duplication	III	2.19211	0.933364	-0.000677	-0.157464							III	109.35	4.85017
YGL040C	HEM2	Aminolevulinate dehydratase; a homo-octameric enzyme, catalyzes the conversion of 5-aminolevulinate to porphobilinogen, the second step in heme biosynthesis; enzymatic activity is zinc-dependent; localizes to the cytoplasm and nucleus	III	1.79958	1.63192	0.548968	0.474967					II		III	102.404	4.54208
YLR435W	TSR2	Protein with a potential role in pre-rRNA processing	III	1.86527	1.16008	0.693423							II	III	115.56	5.12564
YBR149W	ARA1	NADP+ dependent arabinose dehydrogenase; involved in carbohydrate metabolism; purified as homodimer; naturally occurs with a N-terminus degradation product	III	2.47623	1.63448	1.05702	0.266398	-1.69529						IV	103.353	4.58421
YLR388W	RPS29A	Protein component of the small (40S) ribosomal subunit; homologous to mammalian ribosomal protein S29 and bacterial S14; RPS29A has a paralog, RPS29B, that arose from the whole genome duplication	III	3.6792	2.51898	1.68981	0.686186	0.354502	0.168832	0.101223	-1.4729		II	II	1995.99	88.5313
YDL076C	RXT3	Component of the Rpd3L histone deacetylase complex; involved in histone deacetylation; protein abundance increases in response to DNA replication stress	III	3.09544	1.65568	-0.981189	-1.50567	-1.50567	-2.28025					II	32.1431	1.4257
YOR285W	RDL1	Thiosulfate sulfurtransferase; contains a rhodanese-like domain; localized to the mitochondrial outer membrane; protein abundance increases in response to DNA replication stress; similar to the human TSTD gene	III	1.08304	0.494327	0.494327	0.494327	-0.373361						IV	225.589	10.0059
YOR021C	SFM1	SPOUT methyltransferase; catalyzes omega-monomethylation of Rps3p on Arg-146; not an essential gene; predicted to be involved in rRNA processing and ribosome biogenesis and in biopolymer catabolism	III	1.56736	0.81174	0.457734	-1.77296	-1.77296				IV		IV	222.251	9.85788
YOR293W	RPS10A	Protein component of the small (40S) ribosomal subunit; homologous to mammalian ribosomal protein S10, no bacterial homolog; RPS10A has a paralog, RPS10B, that arose from the whole genome duplication	III	1.72102	0.611436	0.295228	0.101223	-0.192788	-0.82082	-3.28025	-3.28025		III	IV	1152.64	51.1251
YHR073W	OSH3	Member of an oxysterol-binding protein family; this family has seven members in S. cerevisiae; family members have overlapping, redundant functions in sterol metabolism and collectively perform a function essential for viability; contains FFAT motif; interacts with ER anchor Scs2p at patches at the plasma membrane; regulated by sterol binding	III	1.46773	0.624216	0.320502	0.030289	-0.044313	-0.981189				IV	IV	54.495	2.41711
YPL093W	NOG1	Putative GTPase; associates with free 60S ribosomal subunits in the nucleolus and is required for 60S ribosomal subunit biogenesis; constituent of 66S pre-ribosomal particles; member of the ODN family of nucleolar G-proteins	III	0.551521	0.282612	0.282612	-0.827438	-0.965605					II	IV	407.322	18.0666
YOR335C	ALA1	Cytoplasmic and mitochondrial alanyl-tRNA synthetase; required for protein synthesis; point mutation (cdc64-1 allele) causes cell cycle arrest at G1; lethality of null mutation is functionally complemented by human homolog AARS; mutations in human homolog AARS are associated with autoimmune disease polymyositis/dermatomyositis	III	3.175	1.67905	-0.338109	-0.965605	-1.188					IV	II	486.189	21.5647
YNR052C	POP2	RNase of the DEDD superfamily; subunit of the Ccr4-Not complex that mediates 3' to 5' mRNA deadenylation	III	2.91323	2.24745	1.17918	1.0773	1.0773	1.0773	0.889674			III	III	53.4285	2.3698
YNL044W	YIP3	Protein localized to COPII vesicles; proposed to be involved in ER to Golgi transport; interacts with members of the Rab GTPase family and Yip1p; also interacts with Rtn1p	III	2.73582	1.75282	-0.373361	-0.472896	-0.472896				IV	II	II	126.699	5.61968
YDR100W	TVP15	Integral membrane protein; localized to late Golgi vesicles along with the v-SNARE Tlg2p	III	2.00724	1.16008	0.496978	-1.20619	-1.20619						III	59.5796	2.64263
YOR272W	YTM1	Constituent of 66S pre-ribosomal particles; forms a complex with Nop7p and Erb1p that is required for maturation of the large ribosomal subunit; has seven C-terminal WD repeats	III	2.33455	1.64183	1.64183	1.46486	0.967676	0.967676	0.967676	-2.69529		II	II	154.368	6.84694
YIL158W	AIM20	Putative protein of unknown function; overexpression causes cell cycle delay or arrest; green fluorescent protein (GFP)-fusion protein localizes to vacuole; null mutant displays elevated frequency of mitochondrial genome loss; relocalizes from nucleus to cytoplasm upon DNA replication stress; AIM20 has a paralog, SKG1, that arose from the whole genome duplication	III	1.5067	0.773459	0.664252	-1.4729	-1.4729				IV		II	62.3034	2.76345
YGL070C	RPB9	RNA polymerase II subunit B12.6; contacts DNA; mutations affect transcription start site selection and fidelity of transcription	III	1.8524	0.9798	0.057016	-1.13576	-1.50567	-2.28025				II	II	89.8106	3.98352
YBL034C	STU1	Component of the mitotic spindle; binds to interpolar microtubules via its association with beta-tubulin (Tub2p); required for interpolar microtubules to provide an outward force on the spindle poles	III	1.48034	0.488681	0.354502	0.071757	-2.69529						II	18.8862	0.837692
YDR097C	MSH6	Protein required for mismatch repair in mitosis and meiosis; forms a complex with Msh2p to repair both single-base & insertion-deletion mispairs; also involved in interstrand cross-link repair; potentially phosphorylated by Cdc28p	III	2.86058	0.646763	0.57773	0.474636	0.474636	-0.110326	-3.28025		III	IV	IV	37.2878	1.65389
YOR103C	OST2	Epsilon subunit of the oligosaccharyltransferase complex; located in the ER lumen; catalyzes asparagine-linked glycosylation of newly synthesized proteins	III	2.82853	1.01304	0.266398	-1.77296						I	II	125.825	5.58093
YPR067W	ISA2	Protein required for maturation of mitochondrial [4Fe-4S] proteins; functions in a complex with Isa1p and possibly Iba57p; localizes to the mitochondrial intermembrane space, overexpression of ISA2 suppresses grx5 mutations	III	1.64691	0.965764	0.474636	-0.373361					II		III	44.3688	1.96796
YKL127W	PGM1	Phosphoglucomutase, minor isoform; catalyzes the conversion from glucose-1-phosphate to glucose-6-phosphate, which is a key step in hexose metabolism; PGM1 has a paralog, PGM2, that arose from the whole genome duplication	III	2.40854	1.71861	0.686186	0.46621	0.041677						II	116.462	5.16565
YBL047C	EDE1	Scaffold protein involved in the formation of early endocytic sites; putative regulator of cytokinesis; homo-oligomerization is required for localization to and organization of endocytic sites; has a network of interactions with other endocytic proteins; binds membranes in a ubiquitin-dependent manner; may also bind ubiquitinated membrane-associated proteins; interacts with Cmk2 and functions ups…	III	1.98169	-1.11033	-1.11033	-1.11033	-1.11033					III	III	109.683	4.86496
YIL051C	MMF1	Mitochondrial protein required for transamination of isoleucine; but not of valine or leucine; may regulate specificity of branched-chain transaminases Bat1p and Bat2p; induction of expression in response to stress is mediated by a Hog1p-regulated antisense RNA and gene looping; interacts genetically with mitochondrial ribosomal protein genes; MMF1 has a paralog, HMF1, that arose from the whole g…	III	2.90184	0.213414	-0.056403	-0.82082	-0.958323	-0.958323	-1.11033	-1.11033	III	II	II	933.849	41.4206
YOR079C	ATX2	Golgi membrane protein involved in manganese homeostasis; overproduction suppresses the sod1 (copper, zinc superoxide dismutase) null mutation	III	2.41073	1.41739	0.916887	0.285682	-0.695289						II	34.034	1.50957
YNL151C	RPC31	RNA polymerase III subunit C31	III	2.015	1.03417	0.463501	-1.13576	-1.38856						II	57.9053	2.56837
YBR089C-A	NHP6B	High-mobility group (HMG) protein; binds to and remodels nucleosomes; involved in recruiting FACT and other chromatin remodelling complexes to the chromosomes; functionally redundant with Nhp6Ap; required for transcriptional initiation fidelity of some tRNA genes; homologous to mammalian HMGB1 and HMGB2; NHP6B has a paralog, NHP6A, that arose from the whole genome duplication	III	0.959773	0.351575	0.03804	-0.284798	-2.28025						III	73.0895	3.24186
YNL075W	IMP4	Component of the SSU processome; SSU processome is required for pre-18S rRNA processing; interacts with Mpp10p; member of a superfamily of proteins that contain a sigma(70)-like motif and associate with RNAs	III	2.05219	1.56073	0.432003	-1.188							II	127.104	5.63765
YNL149C	PGA2	Essential protein required for maturation of Gas1p and Pho8p; involved in protein trafficking; GFP-fusion protein localizes to the ER and YFP-fusion protein to the nuclear envelope-ER network; null mutants have a cell separation defect	III	1.60008	1.3895										206.213	9.14652
YKL152C	GPM1	Tetrameric phosphoglycerate mutase; mediates the conversion of 3-phosphoglycerate to 2-phosphoglycerate during glycolysis and the reverse reaction during gluconeogenesis	III	2.26387	1.17753	0.417392	-0.701355	-0.965605	-1.188	-1.45103			II	II	9298.35	412.425
YDL019C	OSH2	Member of an oxysterol-binding protein family with seven members; in S. cerevisiae, family members have overlapping, redundant functions in sterol metabolism and collectively perform a function essential for viability; contains FFAT motif; interacts with ER anchor Scs2p at patches at the plasma membrane and at the nuclear envelope; regulated by sterol binding; OSH2 has a paralog, SWH1, that arose…	III	2.46418	1.22024	-0.072521	-0.603035						III	IV	29.298	1.2995
tK(UUU)D	#N/A	#N/A	III	1.41739	1.2937	0.791647	-0.110326								#N/A	#N/A
YMR126C	DLT1	Protein of unknown function; mutant sensitive to 6-azauracil (6AU) and mycophenolic acid (MPA)	III	1.69227	1.16363	-0.714318	-1.04431	-1.28025	-1.69529					III	21.1896	0.93986
YOR151C	RPB2	RNA polymerase II second largest subunit B150; part of central core; similar to bacterial beta subunit	III	2.744	1.23679	0.69111	-0.43516	-0.43516	-2.33811					II	166.597	7.38936
YDR428C	BNA7	Formylkynurenine formamidase; involved in the de novo biosynthesis of NAD from tryptophan via kynurenine	III	1.92515	-0.338109	-0.338109	-0.338109	-0.338109						IV	42.4262	1.8818
YER063W	THO1	Conserved nuclear RNA-binding protein; specifically binds to transcribed chromatin in a THO- and RNA-dependent manner, genetically interacts with shuttling hnRNP NAB2; overproduction suppresses transcriptional defect caused by hpr1 mutation	III	2.70263	1.64078	0.22704							IV	III	91.1512	4.04298
YBR268W	MRPL37	Mitochondrial ribosomal protein of the large subunit	IV	1.43045	-0.16164	-1.69529	-1.95832					I			63.4802	2.81564
YPR010C	RPA135	RNA polymerase I second largest subunit A135	IV	1.57522	0.46621	-0.597368	-1.30889	-2.13576	-4.28025				II	III	339.087	15.0401
YDR152W	GIR2	Highly-acidic RWD domain-containing protein of unknown function; cytoplasmic; forms a complex with Rbg2p; interacts with Rbg1p and Gcn1p; associates with translating ribosomes; putative intrinsically unstructured protein	IV	1.75615	0.824982	0.598542	-2.28025	-2.69529						III	141.275	6.2662
YHR001W	OSH7	Oxysterol-binding protein; part of family with seven members in S. cerevisiae; family members have overlapping, redundant functions in sterol metabolism and collectively perform a function essential for viability; OSH7 has a paralog, OSH6, that arose from the whole genome duplication	IV	1.71748	0.240149	-0.695289	-3.28025	-3.28025					III	III	43.2715	1.91929
YHR049W	FSH1	Putative serine hydrolase; localizes to both the nucleus and cytoplasm; sequence is similar to S. cerevisiae Fsh2p and Fsh3p and the human candidate tumor suppressor OVCA2	IV	1.93348	0.755039	-0.157464							IV	III	179.402	7.95732
YBR282W	MRPL27	Mitochondrial ribosomal protein of the large subunit; homolog of human Bcl-2 interacting protein BMRP	IV	2.41223	1.59731	-0.445931	-2.77296					I			39.3967	1.74743
YMR109W	MYO5	One of two type I myosin motors; contains proline-rich tail homology 2 (TH2) and SH3 domains; MYO5 deletion has little effect on growth, but myo3 myo5 double deletion causes severe defects in growth and actin cytoskeleton organization; MYO5 has a paralog, MYO3, that arose from the whole genome duplication	IV	1.12475	-1.16164	-1.53921	-2.188	-2.188						II	60.4537	2.6814
YFL038C	YPT1	Rab family GTPase; involved in the ER-to-Golgi step of the secretory pathway; complex formation with the Rab escort protein Mrs6p is required for prenylation of Ypt1p by protein geranylgeranyltransferase type II (Bet2p-Bet4p); binds to unspliced HAC1 mRNA; regulates unfolded protein response (UPR) by promoting the decay of HAC1 RNA	IV	1.26154	0.696017	-1.63314	-2.00442	-2.33811	-2.77296	-2.77296	-3.77296	IV		III	431.194	19.1255
YOR312C	RPL20B	Ribosomal 60S subunit protein L20B; homologous to mammalian ribosomal protein L18A, no bacterial homolog; RPL20B has a paralog, RPL20A, that arose from the whole genome duplication	IV	2.56334	0.99347	-0.579811	-1.95832	-1.95832	-2.69529	-3.28025			III	IV	1455.45	64.556
YGR054W		Eukaryotic initiation factor (eIF) 2A; associates specifically with both 40S subunits and 80 S ribosomes, and interacts genetically with both eIF5b and eIF4E; homologous to mammalian eIF2A	IV	0.440631	0.213414	-1.2611	-4.28025	-4.28025	-4.28025	-4.28025	-4.28025	II			199.049	8.82874
YNL067W	RPL9B	Ribosomal 60S subunit protein L9B; homologous to mammalian ribosomal protein L9 and bacterial L6; RPL9B has a paralog, RPL9A, that arose from a single-locus duplication	IV	1.28261	0.83836	-1.50567	-1.50567	-2.69529					I	III	728.277	32.3025
YBL017C	PEP1	Type I transmembrane sorting receptor for multiple vacuolar hydrolases; cycles between the late-Golgi and prevacuolar endosome-like compartments	IV	3.12208	1.12111	0.818376	-2.77296	-2.77296	-2.77296	-2.77296	-2.77296			IV	75.4171	3.3451
YHR167W	THP2	Subunit of the THO and TREX complexes; THO connects transcription elongation and mitotic recombination, and TREX is recruited to activated genes and couples transcription to mRNA export; involved in telomere maintenance	IV	1.98465	1.37571	-2.28025	-2.69529	-4.28025						III	22.0928	0.979919
YKL172W	EBP2	Required for 25S rRNA maturation and 60S ribosomal subunit assembly; localizes to the nucleolus and in foci along nuclear periphery; constituent of 66S pre-ribosomal particles; cooperates with Rrs1p and Mps3p to mediate telomere clustering by binding Sir4p, but is not involved in telomere tethering	IV	2.23609	1.78272	-0.597368	-2.50567	-3.00442					I	III	157.901	7.00365
YHR149C	SKG6	Integral membrane protein; localizes primarily to growing sites such as the bud tip or the cell periphery; potential Cdc28p substrate; Skg6p interacts with Zds1p and Zds2p; SKG6 has a paralog, TOS2, that arose from the whole genome duplication	IV	2.2937	0.686186	-1.84159	-3.77296							II	37.7843	1.67591
YPL128C	TBF1	Telobox-containing general regulatory factor; binds TTAGGG repeats within subtelomeric anti-silencing regions (STARs), blocking silent chromatin propagation; binds majority of snoRNA gene promoters, required for full snoRNA expression; caps DSB flanked by long T2AG3 repeats and blocks checkpoint activation	IV	1.15149	1.00142	-2.28025	-2.69529	-4.28025						III	41.4543	1.83869
YEL031W	SPF1	P-type ATPase, ion transporter of the ER membrane; required to maintain normal lipid composition of intracellular compartments and proper targeting of mitochondrial outer membrane tail-anchored proteins; involved in ER function and Ca2+ homeostasis; required for regulating Hmg2p degradation; confers sensitivity to a killer toxin (SMKT) produced by Pichia farinosa KK1	IV	0.326844	0.137333	-1.33811	-2.00442	-2.77296	-2.77296	-2.77296				IV	276.195	12.2505
YNL098C	RAS2	GTP-binding protein; regulates nitrogen starvation response, sporulation, and filamentous growth; farnesylation and palmitoylation required for activity and localization to plasma membrane; homolog of mammalian Ras proto-oncogenes; RAS2 has a paralog, RAS1, that arose from the whole genome duplication	IV	1.73638	1.06998	-0.862667	-1.95832	-1.95832	-1.95832					II	119.5	5.30037
YJL078C	PRY3	Cell wall-associated protein involved in export of acetylated sterols; member of the CAP protein superfamily (cysteine-rich secretory proteins (CRISP), antigen 5, and pathogenesis related 1 proteins); role in mating efficiency; expression of full-length transcript is daughter cell-specific; in response to alpha factor, a short transcript starting at +452 is expressed and the long form is represse…	IV	1.876	0.981694	-1.11033	-1.4729							III	13.6909	0.607254
YDR304C	CPR5	Peptidyl-prolyl cis-trans isomerase (cyclophilin) of the ER; catalyzes the cis-trans isomerization of peptide bonds N-terminal to proline residues; transcriptionally induced in response to unfolded proteins in the ER; CPR5 has a paralog, CPR2, that arose from the whole genome duplication	IV	2.73764	1.16717	-2.33811								II	313.922	13.9239
YBL091C	MAP2	Methionine aminopeptidase; catalyzes the cotranslational removal of N-terminal methionine from nascent polypeptides; function is partially redundant with that of Map1p	IV	0.935561	-0.233387	-0.806868								IV	134.638	5.97182
YJL092W	SRS2	DNA helicase and DNA-dependent ATPase; involved in DNA repair and checkpoint recovery, needed for proper timing of commitment to meiotic recombination and transition from Meiosis I to II; blocks trinucleotide repeat expansion; affects genome stability; disassembles Rad51p nucleoprotein filaments during meiotic recombination; functional homolog of human RTEL1	IV	1.87396									III	III	28.8102	1.27787
YDR086C	SSS1	Subunit of the Sec61p translocation complex (Sec61p-Sss1p-Sbh1p); this complex forms a channel for passage of secretory proteins through the endoplasmic reticulum membrane, and of the Ssh1p complex (Ssh1p-Sbh2p-Sss1p); interacts with Ost4p and Wbp1p	IV	1.79273	-0.247178	-1.95832	-2.28025	-3.28025	-3.28025					IV	550.843	24.4325
YDR399W	HPT1	Dimeric hypoxanthine-guanine phosphoribosyltransferase; catalyzes the transfer of the phosphoribosyl portion of 5-phosphoribosyl-alpha-1-pyrophosphate to a purine base (either guanine or hypoxanthine) to form pyrophosphate and a purine nucleotide (either guanosine monophosphate or inosine monophosphate); mutations in the human homolog HPRT1 can cause Lesch-Nyhan syndrome and Kelley-Seegmiller syn…	IV	0.710359	0.147909	-1.7336	-1.7336	-3.77296					II	III	337.196	14.9562
YGR231C	PHB2	Subunit of the prohibitin complex (Phb1p-Phb2p); prohibitin is a 1.2 MDa ring-shaped inner mitochondrial membrane chaperone that stabilizes newly synthesized proteins; determinant of replicative life span; involved in mitochondrial segregation; prohibitin deficiency induces a mitochondrial unfolded protein response (mtUPR)	IV	0.881331	0.6716	-0.965605	-3.77296	-3.77296	-3.77296	-3.77296	-3.77296	II			110.664	4.90847
YGR264C	MES1	Methionyl-tRNA synthetase; forms a complex with glutamyl-tRNA synthetase (Gus1p) and Arc1p, which increases the catalytic efficiency of both tRNA synthetases; also has a role in nuclear export of tRNAs; mutations in human ortholog MARS are associated with pediatric pulmonary alveolar proteinosis	IV	2.09948	1.1301	-0.505673	-1.69529	-3.28025						II	421.398	18.691
YOR006C	TSR3	Protein required for 20S pre-rRNA processing; involved in processing of the 20S pre-rRNA at site D to generate mature 18S rRNA; green fluorescent protein (GFP)-fusion protein localizes to both the cytoplasm and the nucleus; relative distribution to the nucleus increases upon DNA replication stress	IV	0.384859	-0.579811	-0.579811									34.0479	1.51019
YOR249C	APC5	Subunit of the Anaphase-Promoting Complex/Cyclosome (APC/C); APC/C is a ubiquitin-protein ligase required for degradation of anaphase inhibitors, including mitotic cyclins, during the metaphase/anaphase transition; component of the platform domain of the APC/C, based on structural analysis; relative distribution to nuclear foci decreases upon DNA replication stress	IV	1.65553	-0.579811	-0.958323	-0.958323							III	15.2147	0.674843
TLC1	#N/A	#N/A	IV	0.820755	0.390925	-1.4729								IV	#N/A	#N/A
YGL076C	RPL7A	Ribosomal 60S subunit protein L7A; required for processing of 27SA3 pre-rRNA to 27SB pre-rRNA during assembly of large ribosomal subunit; depletion leads to a turnover of pre-rRNA; contains a conserved C-terminal Nucleic acid Binding Domain (NDB2); binds to Domain II of 25S and 5.8S rRNAs; homologous to mammalian ribosomal protein L7 and bacterial L30; RPL7A has a paralog, RPL7B, that arose from …	IV	2.61334	1.15485	-0.958323	-2.28025	-3.28025	-3.28025				IV	IV	344.841	15.2953
YJL145W	SFH5	Non-classical phosphatidylinositol transfer protein (PITP); exhibits PI- but not PC-transfer activity; localizes to the peripheral endoplasmic reticulum, cytosol and microsomes; similar to Sec14p; partially relocalizes to the plasma membrane upon DNA replication stress	IV	1.97672	0.971729	0.223448	-0.663877	-4.28025						II	114.784	5.09121
YMR086W	SEG1	Component of eisosome required for proper eisosome assembly; precedes Pil1p/Lsp1p during eisosome formation, controls eisosome length and shape; diffusely distributed, forms heterogeneous patches at plasma membrane in small buds, also found in medium and large buds; expression repressed by cAMP; similar to A. gossypii SEG gene and to S. pombe Sle1p, important for generating eisosomes; SEG1 has a …	IV	1.95569	-0.53379	-0.82082	-3.28025						III	III	26.8823	1.19235
YEL037C	RAD23	Protein with ubiquitin-like N terminus; subunit of Nuclear Excision Repair Factor 2 (NEF2) with Rad4p that binds damaged DNA; enhances protein deglycosylation activity of Png1p; also involved, with Rad4p, in ubiquitylated protein turnover	IV	1.37283	1.08854	0.298645	-2.28025							III	141.593	6.28031
YPL196W	OXR1	Protein of unknown function required for oxidative damage resistance; required for normal levels of resistance to oxidative damage; null mutants are sensitive to hydrogen peroxide; member of a conserved family of proteins found in eukaryotes	IV	1.19823	-0.032324									IV	20.6238	0.91476
YPL118W	MRP51	Mitochondrial ribosomal protein of the small subunit; MRP51 exhibits genetic interactions with mutations in the COX2 and COX3 mRNA 5'-untranslated leader sequences	IV	0.86219	0.317506	-0.451032						II	III	III	85.9629	3.81285
YIL142W	CCT2	Subunit beta of the cytosolic chaperonin Cct ring complex; related to Tcp1p, required for the assembly of actin and tubulins in vivo	IV	1.86	0.23023	-1.95832							III	III	245.426	10.8858
YIL052C	RPL34B	Ribosomal 60S subunit protein L34B; homologous to mammalian ribosomal protein L34, no bacterial homolog; RPL34B has a paralog, RPL34A, that arose from the whole genome duplication	IV	1.77809	-0.597368	-1.69529	-2.69529	-3.28025	-3.28025	-3.28025	-3.28025	IV	IV	III	1034.56	45.8878
YDR450W	RPS18A	Protein component of the small (40S) ribosomal subunit; homologous to mammalian ribosomal protein S18 and bacterial S13; RPS18A has a paralog, RPS18B, that arose from the whole genome duplication; protein increases in abundance and relocalizes from cytoplasm to nuclear foci upon DNA replication stress	IV	1.26795	0.049367	-0.445931	-2.50567	-2.50567	-3.00442	-4.28025	-4.28025			III	1592.33	70.6272
YOL065C	INP54	Phosphatidylinositol 4,5-bisphosphate 5-phosphatase; role in secretion; localizes to the endoplasmic reticulum via the C-terminal tail; lacks the Sac1 domain and proline-rich region found in the other 3 INP proteins	IV	1.2549	-0.284798	-0.827438	-3.00442	-4.28025	-4.28025	-4.28025	-4.28025			III	17.9855	0.797739
YNR051C	BRE5	Ubiquitin protease cofactor; forms deubiquitination complex with Ubp3p that coregulates anterograde and retrograde transport between the endoplasmic reticulum and Golgi compartments; null is sensitive to brefeldin A	IV	1.66425	0.206552							IV		III	103.695	4.59938
YMR277W	FCP1	Carboxy-terminal domain (CTD) phosphatase; essential for dephosphorylation of the repeated C-terminal domain of the RNA polymerase II large subunit (Rpo21p); relocalizes to the cytosol in response to hypoxia	IV	1.60515	0.715202	0.272982	-3.77296							II	56.7841	2.51864
YLR108C		Protein of unknown function; green fluorescent protein (GFP)-fusion protein localizes to the nucleus; YLR108C is not an esssential gene; protein abundance increases in response to DNA replication stress; YLR108C has a paralog, YDR132C, that arose from the whole genome duplication	IV	2.59545	1.24192	-1.59737	-1.59737	-1.95832						III	19.6134	0.869948
YER165W	PAB1	Poly(A) binding protein; part of the 3'-end RNA-processing complex, mediates interactions between the 5' cap structure and the 3' mRNA poly(A) tail, involved in control of poly(A) tail length, interacts with translation factor eIF-4G; stimulates, but is not required for the deadenylation activity of the Pan2p-Pan3p poly(A)-ribonuclease complex	IV	1.65924	-0.076942	-1.04431	-1.4729	-4.28025					III	II	1025.6	45.4903
YNL197C	WHI3	RNA binding protein that sequesters CLN3 mRNA in cytoplasmic foci; regulates genes involved in the cell cycle, sister chromatid cohesion, and stress response; acts as a cytoplasmic retention factor for Cdc28p and associated cyclins; regulates cell fate and dose-dependently regulates the critical cell size required for passage through Start; Tpk1p (PKA) mediated phosphorylation (S568) inhibits Whi…	IV	2.29846	1.98959	0.49167	-3.77296							III	37.3877	1.65832
YMR091C	NPL6	Component of the RSC chromatin remodeling complex; interacts with Rsc3p, Rsc30p, Ldb7p, and Htl1p to form a module important for a broad range of RSC functions; involved in nuclear protein import and maintenance of proper telomere length	IV	1.42472	0.105132	-0.603035								II	53.0408	2.35261
YGR130C		Component of the eisosome with unknown function; GFP-fusion protein localizes to the cytoplasm; specifically phosphorylated in vitro by mammalian diphosphoinositol pentakisphosphate (IP7)	IV	3.36406	2.0587	-1.59737	-2.28025						II	II	36.3862	1.6139
YGR079W		Putative protein of unknown function; YGR079W is not an essential gene	IV	1.81294	0.298645	-1.50567	-1.50567							III	93.4081	4.14309
YOR361C	PRT1	eIF3b subunit of the eukaryotic translation initiation factor 3 (eIF3); subunit of the core complex of eIF3; essential for translation; part of a subcomplex (Prt1p-Rpg1p-Nip1p) that stimulates binding of mRNA and tRNA(i)Met to ribosomes	IV	2.47051	0.955924	-1.84159	-4.28025						II	IV	291.658	12.9364
YDR233C	RTN1	Reticulon protein; stabilizes membrane curvature; involved in nuclear pore assembly and maintenance of tubular ER morphology; mutant overexpressing RTN1 shows increase in tubular ER; interacts with exocyst subunit Sec6p, Yip3p, and Sbh1p; more abundant than Rtn2p; member of the RTNLA subfamily; mutants have reduced phosphatidylserine transfer between the ER and mitochondria; RTN1 has a paralog, R…	IV	2.16102	0.026624	-0.048173	-1.69529	-2.28025	-2.28025	-4.28025	-4.28025		IV	III	421.916	18.7139
YHR170W	NMD3	Protein involved in nuclear export of the large ribosomal subunit; acts as a Crm1p-dependent adapter protein for export of nascent ribosomal subunits through the nuclear pore complex	IV	1.61021	0.889674	-0.695289							III	III	245.531	10.8904
YDR534C	FIT1	Mannoprotein that is incorporated into the cell wall; incorporated via a glycosylphosphatidylinositol (GPI) anchor; involved in the retention of siderophore-iron in the cell wall	IV	1.77114	1.53534	0.626639	-2.69529	-2.69529	-2.69529	-2.69529	-2.69529			IV	7.14492	0.316911
YDR154C		Dubious open reading frame; unlikely to encode a functional protein, based on available experimental and comparative sequence data; null mutant exhibits synthetic phenotype with alpha-synuclein	IV	1.80734	0.92527	-0.701355	-1.188	-3.77296						IV	634.944	28.1627
YJL158C	CIS3	Mannose-containing glycoprotein constituent of the cell wall; member of the PIR (proteins with internal repeats) family	IV	2.61151	-0.206195	-0.489192	-1.38856	-3.00442	-4.28025				I	II	640.822	28.4235
YNL087W	TCB2	ER protein involved in ER-plasma membrane tethering; one of 6 proteins (Ist2p, Scs2p, Scs22p, Tcb1p, Tcb2p, Tcb3p) that connect ER to plasma membrane (PM) and regulate PM phosphatidylinositol-4-phosphate (PI4P) levels by controlling access of Sac1p phosphatase to its substrate PI4P in the PM; contains 3 calcium and lipid binding domains; mRNA is targeted to bud; TCB2 has a paralog, TCB1, that aro…	IV	2.46992	1.40722	-0.157464	-3.00442						III	II	114.997	5.10065
YLR401C	DUS3	Dihydrouridine synthase; member of a widespread family of conserved proteins including Smm1p, Dus1p, and Dus4p; contains a consensus oleate response element (ORE) in its promoter region; forms nuclear foci upon DNA replication stress	IV	3.88904	1.63312	0.443383	-4.28025	-4.28025					I	II	77.7352	3.44792
YOR133W	EFT1	Elongation factor 2 (EF-2), also encoded by EFT2; catalyzes ribosomal translocation during protein synthesis; contains diphthamide, the unique posttranslationally modified histidine residue specifically ADP-ribosylated by diphtheria toxin; EFT1 has a paralog, EFT2, that arose from the whole genome duplication	IV	1.81506	1.47329	-1.2611								III	61.2896	2.71848
YOR110W	TFC7	RNA pol III transcription initiation factor complex (TFIIIC) subunit; part of the TauA globular domain of TFIIIC that binds DNA at the BoxA promoter sites of tRNA and similar genes; TFC7 has a paralog, YNL108C, that arose from the whole genome duplication	IV	2.24587	1.2937	0.693423	-4.28025							III	28.4483	1.26182
YPL129W	TAF14	Subunit of TFIID, TFIIF, INO80, SWI/SNF, and NuA3 complexes; involved in RNA polymerase II transcription initiation and in chromatin modification; contains a YEATS domain	IV	2.24173	1.46621	-0.044313	-2.77296							II	92.3525	4.09627
YER036C	ARB1	ATPase of the ATP-binding cassette (ABC) family; involved in 40S and 60S ribosome biogenesis, has similarity to Gcn20p; shuttles from nucleus to cytoplasm, physically interacts with Tif6p, Lsg1p; human homolog ABCF2 can complement yeast ARB1 mutant	IV	2.44055	1.4275	0.354502	-2.50567	-3.28025					IV	IV	528.763	23.4531
YPR072W	NOT5	Subunit of CCR4-NOT global transcriptional regulator; involved intranscription initiation and elongation and in mRNA degradation; conserved lysine in human homolog of Not5p and Not3p is mutated in cancers	IV	1.10687	-0.862667	-1.33811	-2.00442	-2.33811	-4.28025					III	91.1741	4.044
YOL005C	RPB11	RNA polymerase II subunit B12.5; part of central core; similar to Rpc19p and bacterial alpha subunit	IV	0.567365	-0.048173	-0.16164	-1.69529	-1.95832							126.252	5.59985
YPL255W	BBP1	Protein required for the spindle pole body (SPB) duplication; localizes at the cytoplasmic side of the central plaque periphery of the SPB; forms a complex with a nuclear envelope protein Mps2p and SPB components Spc29p and Kar1p; required for mitotic functions of Cdc5p	IV	1.0903	0.569886	0.443383	-3.77296	-3.77296						III	18.556	0.823046
YLR052W	IES3	Subunit of the INO80 chromatin remodeling complex	IV	1.62042	0.320502	-0.695289	-1.69529	-2.69529	-4.28025					III	59.5493	2.64129
YDR454C	GUK1	Guanylate kinase; converts GMP to GDP; required for growth and mannose outer chain elongation of cell wall N-linked glycoproteins	IV	2.3767	0.480337	-1.13576	-2.77296	-2.77296						IV	483.376	21.44
YDR156W	RPA14	RNA polymerase I subunit A14	IV	1.74114	1.65316	-2.77296	-3.77296	-3.77296					I	III	86.0163	3.81523
YML027W	YOX1	Homeobox transcriptional repressor; binds to Mcm1p and to early cell cycle boxes (ECBs) in the promoters of cell cycle-regulated genes expressed in M/G1 phase; expression is cell cycle-regulated; phosphorylated by Cdc28p; relocalizes from nucleus to cytoplasm upon DNA replication stress; YOX1 has a paralog, YHP1, that arose from the whole genome duplication	IV	2.35313	1.68763	-0.403929	-2.50567	-3.28025						III	22.7447	1.00883
YGR041W	BUD9	Protein involved in bud-site selection; mutant has increased aneuploidy tolerance; diploid mutants display a unipolar budding pattern instead of the wild-type bipolar pattern, and bud at the distal pole; BUD9 has a paralog, BUD8, that arose from the whole genome duplication	IV	3.92105	2.5433	1.25157	-4.28025	-4.28025	-4.28025	-4.28025				II	28.1329	1.24783
YOR209C	NPT1	Nicotinate phosphoribosyltransferase; acts in the salvage pathway of NAD+ biosynthesis; required for silencing at rDNA and telomeres and has a role in silencing at mating-type loci; localized to the nucleus	IV	1.27124	0.308106	-1.95832							IV	IV	208.706	9.25708
YLR249W	YEF3	Translation elongation factor 3; contains two ABC cassettes; binds and hydrolyzes ATP; YEF3 has a paralog, HEF3, that arose from the whole genome duplication	IV	2.53123	1.05117	0.196399	-1.28025	-4.28025					IV	II	4782.61	212.131
YHR013C	ARD1	Subunit of protein N-terminal acetyltransferase NatA; NatA is comprised of Nat1p, Ard1p, and Nat5p; acetylates many proteins and thus affects telomeric silencing, cell cycle, heat-shock resistance, mating, and sporulation; human Ard1p levels are elevated in cancer cells; protein abundance increases in response to DNA replication stress	IV	2.75158	1.055	-2.50567	-3.28025	-3.28025	-3.28025				IV	II	147.055	6.5226
YER026C	CHO1	Phosphatidylserine synthase; functions in phospholipid biosynthesis; catalyzes the reaction CDP-diaclyglycerol + L-serine = CMP + L-1-phosphatidylserine, transcriptionally repressed by myo-inositol and choline	IV	1.5067	-0.056403	-1.00442	-2.28025					III	III	III	139.577	6.19088
YKL081W	TEF4	Gamma subunit of translational elongation factor eEF1B; stimulates the binding of aminoacyl-tRNA (AA-tRNA) to ribosomes by releasing eEF1A (Tef1p/Tef2p) from the ribosomal complex	IV	1.9728	0.502591	-0.30889	-0.766586	-2.28025	-3.28025					III	1450.69	64.3448
YNL055C	POR1	Mitochondrial porin (voltage-dependent anion channel); outer membrane protein required for maintenance of mitochondrial osmotic stability and mitochondrial membrane permeability; couples the glutathione pools of the intermembrane space (IMS) and the cytosol; interacts with Om45 and Om14 in the outer membrane; phosphorylated; protein abundance increases in response to DNA replication stress	IV	1.48452	0.502591	-0.270645	-3.28025	-3.28025						III	604.002	26.7903
YLR002C	NOC3	Subunit of a nuclear complex with Noc2p and pre-replicative complexes; the Noc2p-Noc3p complex binds to 66S ribosomal precursors to mediate their maturation and intranuclear transport; binds to chromatin at active replication origins, and is required for pre-RC formation and maintenance during DNA replication licensing	IV	0.947718	-1.188	-1.188	-1.45103	-1.77296	-1.77296					II	88.1074	3.90797
YDL136W	RPL35B	Ribosomal 60S subunit protein L35B; homologous to mammalian ribosomal protein L35 and bacterial L29; RPL35B has a paralog, RPL35A, that arose from the whole genome duplication	IV	0.292178	-0.862667	-1.41946	-2.77296							IV	165.287	7.33125
YFR013W	IOC3	Subunit of the Isw1a complex; Isw1a has nucleosome-stimulated ATPase activity and represses transcription initiation by specific positioning of a promoter proximal dinucleosome; promotes nucleosome shifts in the 5 prime direction; IOC3 has a paralog, ESC8, that arose from the whole genome duplication	IV	2.90091	1.55407	1.09948	-3.00442	-3.00442	-4.28025				IV	II	42.7601	1.89661
YML052W	SUR7	Plasma membrane protein, component of eisosomes; long-lived protein that remains stable in eisosomes of mother cells while other eisosome proteins, Pil1p and Lsp1p, turn over; may function to anchor the eisosome in place; sporulation and plasma membrane sphingolipid content are altered in mutants; localizes to furrow-like invaginations (MCC patches)	IV	0.943597	0.611436	-0.82082	-1.11033	-1.95832						III	112.961	5.01035
YBR109C	CMD1	Calmodulin; Ca++ binding protein that regulates Ca++ independent processes (mitosis, bud growth, actin organization, endocytosis, etc.) and Ca++ dependent processes (stress-activated pathways), targets include Nuf1p, Myo2p and calcineurin	IV	1.38182	1.04553	0.186173	-1.28025	-4.28025						IV	398.395	17.6707
YGR198W	YPP1	Cargo-transport protein involved in endocytosis; interacts with phosphatidylinositol-4-kinase Stt4p; is required, along with Efr3p, for the assembly and recruitment of multiple copies of the kinase into phosphoinositide kinase (PIK) patches at the plasma membrane; positively regulates Stt4p; GFP-fusion protein localizes to the cytoplasm; YGR198W is an essential gene	IV	0.37589	-0.645498	-1.59737	-2.28025	-2.28025	-2.69529					IV	55.3352	2.45438
YJR054W	KCH1	Potassium transporter that mediates K+ influx; activates high-affinity Ca2+ influx system (HACS) during mating pheromone response; expression up-regulated in response to alpha factor; localized to sites of polarized growth; member of a fungal-specific gene family; potential Cdc28p substrate; KCH1 has a paralog, PRM6, that arose from the whole genome duplication	IV	3.19813	1.08106	-1.00442	-1.00442	-2.50567	-3.28025					II	41.388	1.83575
YJR045C	SSC1	Hsp70 family ATPase; constituent of the import motor component of the Translocase of the Inner Mitochondrial membrane (TIM23 complex); involved in protein translocation and folding; subunit of SceI endonuclease; SSC1 has a paralog, ECM10, that arose from the whole genome duplication	IV	0.551521	-0.197068	-0.981189	-1.50567	-2.69529				II		IV	673.134	29.8566
YDR412W	RRP17	Component of the pre-60S pre-ribosomal particle; required for cell viability under standard (aerobic) conditions but not under anaerobic conditions; exonuclease required for 5' end processing of pre-60S ribosomal RNA	IV	1.28568	0.240149	-0.430114	-1.28025	-1.4729	-1.4729	-4.28025			IV	II	57.1145	2.5333
YCR034W	ELO2	Fatty acid elongase, involved in sphingolipid biosynthesis; acts on fatty acids of up to 24 carbons in length; mutations have regulatory effects on 1,3-beta-glucan synthase, vacuolar ATPase, and the secretory pathway; ELO2 has a paralog, ELO1, that arose from the whole genome duplication	IV	0.953758	0.17918									III	197.013	8.73843
YDR376W	ARH1	Oxidoreductase of the mitochondrial inner membrane; involved in cytoplasmic and mitochondrial iron homeostasis and required for activity of Fe-S cluster-containing enzymes; one of the few mitochondrial proteins essential for viability	IV	1.85252	-0.206195							III			29.5197	1.30933
YER043C	SAH1	S-adenosyl-L-homocysteine hydrolase; catabolizes S-adenosyl-L-homocysteine which is formed after donation of the activated methyl group of S-adenosyl-L-methionine (AdoMet) to an acceptor; regulates cellular lipid homoeostasis by regulating phosphatidylcholine(PC)synthesis and triacylglycerol (TG) levels	IV	2.08293	0.798376	0.03804	-1.41946	-3.00442				III	IV	III	1113.29	49.3794
YML113W	DAT1	DNA binding protein that recognizes oligo(dA).oligo(dT) tracts; Arg side chain in its N-terminal pentad Gly-Arg-Lys-Pro-Gly repeat is required for DNA-binding; relocalizes to the cytosol in response to hypoxia; not essential for viability	IV	2.6971	1.39519	-0.841591	-3.77296						III	II	34.705	1.53933
YPL249C-A	RPL36B	Ribosomal 60S subunit protein L36B; binds to 5.8 S rRNA; homologous to mammalian ribosomal protein L36, no bacterial homolog; RPL36B has a paralog, RPL36A, that arose from the whole genome duplication	IV	1.89295	0.939465	-1.28025									1543.23	68.4496
YBR078W	ECM33	GPI-anchored protein of unknown function; possible role in apical bud growth; GPI-anchoring on the plasma membrane crucial to function; phosphorylated in mitochondria; similar to Sps2p; ECM33 has a paralog, PST1, that arose from the whole genome duplication	IV	1.70679	0.269503	-0.280251	-0.82082	-4.28025						III	781.612	34.6681
YBR011C	IPP1	Cytoplasmic inorganic pyrophosphatase (PPase); homodimer that catalyzes the rapid exchange of oxygens from Pi with water, highly expressed and essential for viability, active-site residues show identity to those from E. coli PPase	IV	3.30376	1.75863	-0.958323	-4.28025	-4.28025	-4.28025	-4.28025	-4.28025	IV	IV	IV	1566.28	69.4721
YJL081C	ARP4	Nuclear actin-related protein involved in chromatin remodeling; component of chromatin-remodeling enzyme complexes	IV	2.012	-0.403929	-1.11033	-4.28025						III	III	74.0896	3.28622
YNL173C	MDG1	Plasma membrane protein; involved in G-protein mediated pheromone signaling pathway; overproduction suppresses bem1 mutations; MDG1 has a paralog, CRP1, that arose from the whole genome duplication	IV	2.40122	0.518979										30.4081	1.34874
YNL300W	TOS6	Glycosylphosphatidylinositol-dependent cell wall protein; expression is periodic and decreases in respone to ergosterol perturbation or upon entry into stationary phase; depletion increases resistance to lactic acid	IV	2.11939	0.285682	-2.28025								IV	161.891	7.18064
YLR357W	RSC2	Component of the RSC chromatin remodeling complex; required for expression of mid-late sporulation-specific genes; involved in telomere maintenance; RSC2 has a paralog, RSC1, that arose from the whole genome duplication	IV	1.49846	0.768809	0.223448	-0.663877	-3.77296						III	41.2499	1.82963
YCR057C	PWP2	Conserved 90S pre-ribosomal component; essential for proper endonucleolytic cleavage of the 35 S rRNA precursor at A0, A1, and A2 sites; contains eight WD-repeats; PWP2 deletion leads to defects in cell cycle and bud morphogenesis	IV	3.14088	-0.080891	-0.981189	-1.84159	-3.28025					IV	II	130.983	5.80971
YJR109C	CPA2	Large subunit of carbamoyl phosphate synthetase; carbamoyl phosphate synthetase catalyzes a step in the synthesis of citrulline, an arginine precursor	IV	2.06809	0.893951	-0.110326	-0.82082	-2.69529	-4.28025				I	III	66.6944	2.95821
YGL041W-A		Putative protein of unknown function; conserved in fungi; identified by expression profiling and mass spectrometry	IV	2.20746	1.77114	1.055	-4.28025	-4.28025				IV		III	59.0502	2.61915
YLR285C-A		Putative protein of unknown function; identified by fungal homology and RT-PCR	IV	1.33316	0.200058	-0.224087	-0.603035	-3.77296	-3.77296					III	466.397	20.6869
YFL034C-A	RPL22B	Ribosomal 60S subunit protein L22B; homologous to mammalian ribosomal protein L22, no bacterial homolog; RPL22B has a paralog, RPL22A, that arose from the whole genome duplication	IV	2.3376	0.82287	-0.373361						IV	III	II	129.169	5.72925
YER140W	EMP65	Integral membrane protein of the ER; forms an ER-membrane associated protein complex with Slp1p; identified along with SLP1 in a screen for mutants defective in the unfolded protein response (UPR); proposed to function in the folding of integral membrane proteins; interacts genetically with MPS3; the authentic, non-tagged protein is detected in highly purified mitochondria in high-throughput stud…	IV	2.79676	1.46215	-3.00442	-4.28025							II	18.4397	0.817886
YGR188C	BUB1	Protein kinase involved in the cell cycle checkpoint into anaphase; in complex with Mad1p and Bub3p, prevents progression into anaphase in presence of spindle damage; Cdc28p-mediated phosphorylation at Bub1p-T566 is important for degradation in anaphase and adaptation of checkpoint to prolonged mitotic arrest; associates with centromere DNA via Skp1p; involved in Sgo1p relocalization in response …	IV	1.14791	0.213414	-1.02804	-1.02804	-4.28025						IV	8.27387	0.366985
YBR222C	PCS60	Oxalyl-CoA synthetase; capable of catalyzing conversion of oxalate to oxalyl-CoA; catalyzes first step in pathway of oxalate degradation that functions to protect yeast from inhibitory effects of oxalate; peroxisomal protein that binds mRNA; localizes to both peroxisomal peripheral membrane and matrix, expression is highly inducible by oleic acid; similar to E. coli long chain acyl-CoA synthetase	IV	0.722296	-1.4729	-4.28025							IV		70.6991	3.13583
YNL283C	WSC2	Sensor-transducer of the stress-activated PKC1-MPK1 signaling pathway; involved in maintenance of cell wall integrity and recovery from heat shock; required for the arrest of secretion response; WSC2 has a paralog, WSC3, that arose from the whole genome duplication	IV	0.137333	-2.69529										48.5322	2.15263
YMR274C	RCE1	Type II CAAX prenyl protease; involved in the proteolysis and maturation of Ras and the a-factor mating pheromone	IV	1.8394	0.246853	-3.28025	-3.28025	-3.28025						III	14.0609	0.623665
YDR063W	AIM7	Protein that interacts with Arp2/3 complex; interacts with Arp2/3 complex to stimulate actin filament debranching and inhibit actin nucleation; has similarity to Cof1p and also to human glia maturation factor (GMF); null mutant displays elevated mitochondrial genome loss	IV	1.79945	-1.41946	-3.28025	-3.28025							II	89.6759	3.97754
YDR311W	TFB1	Subunit of TFIIH and nucleotide excision repair factor 3 complexes; required for nucleotide excision repair, target for transcriptional activators; relocalizes to the cytosol in response to hypoxia	IV	1.52451	-3.77296	-3.77296								III	33.2534	1.47494
YJL134W	LCB3	Long-chain base-1-phosphate phosphatase; specific for dihydrosphingosine-1-phosphate, regulates ceramide and long-chain base phosphates levels, involved in incorporation of exogenous long chain bases in sphingolipids; LCB3 has a paralog, YSR3, that arose from the whole genome duplication	IV	0.486015	-1.28025	-2.28025	-2.28025	-3.28025	-3.28025					III	43.1103	1.91214
YEL050C	RML2	Mitochondrial ribosomal protein of the large subunit (L2); has similarity to E. coli L2 ribosomal protein; mutant allele (fat21) causes inability to utilize oleate, and induce oleic acid oxidation; may interfere with activity of the Adr1p transcription factor	IV	1.38038	0.304711	-4.28025						II			34.6626	1.53745
YEL017W	GTT3	Protein of unknown function may be involved in glutathione metabolism; function suggested by computational analysis of large-scale protein-protein interaction data; GFP-fusion protein localizes to the nuclear periphery	IV	2.01396	-0.219727	-3.77296	-3.77296	-3.77296						III	38.7818	1.72016
YML025C	YML6	Mitochondrial ribosomal protein of the large subunit; has similarity to E. coli L4 ribosomal protein and human mitoribosomal MRP-L4 protein; essential for viability, unlike most other mitoribosomal proteins	IV	0.384859	-0.472896							III			29.9548	1.32863
YOR288C	MPD1	Member of the protein disulfide isomerase (PDI) family; interacts with and inhibits the chaperone activity of Cne1p; MPD1 overexpression in a pdi1 null mutant suppresses defects in Pdi1p functions such as carboxypeptidase Y maturation	IV	1.90459	-1.2611	-4.28025	-4.28025							III	31.0006	1.37502
YNL273W	TOF1	Subunit of a replication-pausing checkpoint complex; Tof1p-Mrc1p-Csm3p acts at the stalled replication fork to promote sister chromatid cohesion after DNA damage, facilitating gap repair of damaged DNA; interacts with the MCM helicase; relocalizes to the cytosol in response to hypoxia	IV	1.7838	-3.77296								III	III	15.6402	0.693717
YOR332W	VMA4	Subunit E of the V1 domain of the vacuolar H+-ATPase (V-ATPase); V-ATPase is an electrogenic proton pump found throughout the endomembrane system; V1 domain has eight subunits; required for the V1 domain to assemble onto the vacuolar membrane; protein abundance increases in response to DNA replication stress	IV	2.23768	-1.20619	-4.28025	-4.28025							IV	818.874	36.3209
YCL017C	NFS1	Cysteine desulfurase; involved in iron-sulfur cluster (Fe/S) biogenesis and in thio-modification of mitochondrial and cytoplasmic tRNAs; essential protein located predominantly in mitochondria	IV	2.38941	-0.338109	-3.28025	-4.28025					III	IV		94.2044	4.17841
YKL214C	YRA2	Member of the REF (RNA and export factor binding proteins) family; when overexpressed, can substitute for the function of Yra1p in export of poly(A)+ mRNA from the nucleus	IV	2.86591	-1.63314	-1.88405	-2.188	-2.188						III	68.4843	3.0376
YJL069C	UTP18	Small-subunit processome protein involved in pre-18S rRNA maturation; part of a subunit of the 90S preribosomal particle capable of interacting directly with the 5' ETS of the 35S pre-rRNA; contains WD40 repeats	IV	0.963848	-4.28025	-4.28025							IV		85.5	3.79232
YMR264W	CUE1	Ubiquitin-binding protein; endoplasmic reticulum membrane protein that recruits the ubiquitin-conjugating enzyme Ubc7p to the ER where it functions in protein degradation; contains a CUE domain that binds ubiquitin to facilitate intramolecular monoubiquitination; CUE1 has a paralog, CUE4, that arose from the whole genome duplication	IV	2.07364	-2.33811	-3.77296	-3.77296	-3.77296	-3.77296					III	84.2517	3.73696
YMR188C	MRPS17	Mitochondrial ribosomal protein of the small subunit	IV	2.51286	0.572711	-4.28025						III		IV	38.0378	1.68715
YDR507C	GIN4	Protein kinase involved in bud growth and assembly of the septin ring; proposed to have kinase-dependent and kinase-independent activities; undergoes autophosphorylation; similar to Hsl1p; GIN4 has a paralog, KCC4, that arose from the whole genome duplication	IV	0.696017	-1.63314	-2.188	-2.188						III		58.8693	2.61113
YDL174C	DLD1	D-lactate dehydrogenase; oxidizes D-lactate to pyruvate, transcription is heme-dependent, repressed by glucose, and derepressed in ethanol or lactate; located in the mitochondrial inner membrane	IV	1.34387	-2.13576									III	33.1209	1.46907
YDR345C	HXT3	Low affinity glucose transporter of the major facilitator superfamily; expression is induced in low or high glucose conditions; HXT3 has a paralog, HXT5, that arose from the whole genome duplication	IV	0.616622	-0.841591	-2.00442	-2.50567	-3.77296	-3.77296	-3.77296				II	680.435	30.1805
YOR283W		Phosphatase with a broad substrate specificity; has some similarity to GPM1/YKL152C, a phosphoglycerate mutase; YOR283W is not an essential gene	IV	2.14707	1.28089	-4.28025							IV	II	106.492	4.7234
YJL196C	ELO1	Elongase I, medium-chain acyl elongase; catalyzes carboxy-terminal elongation of unsaturated C12-C16 fatty acyl-CoAs to C16-C18 fatty acids; ELO1 has a paralog, ELO2, that arose from the whole genome duplication	IV	2.02743	-1.2611	-4.28025	-4.28025	-4.28025						III	105.44	4.67677
YNR046W	TRM112	Protein involved in methylation of tRNA, rRNA, and translation factors; also involved in ribosome biogenesis; subunit of tRNA methyltransferase (MTase) complexes in combination with Trm9p and Trm11p; N7-methylates G1575 of 18S rRNA as complex with Bud23p; subunit of complex with Mtq2p that methylates Sup45p (eRF1) in the ternary complex eRF1-eRF3-GTP; relative distribution to the nucleus increase…	IV	1.59483	-2.33811								II	II	164.296	7.28727
YAR002C-A	ERP1	Member of the p24 family involved in ER to Golgi transport; role in misfolded protein quality control; forms heterotrimeric complex with Erp2p, Emp24p, and Erv25p; localized to COPII-coated vesicles; ERP1 has a paralog, ERP6, that arose from the whole genome duplication	IV	1.37445	-1.45103	-1.45103	-2.77296	-2.77296	-2.77296					II	285.509	12.6636
YCR015C	CTO1	Protein required for cold tolerance; involved in phosphate uptake; YCR015C is not an essential gene	IV	1.52321	-0.597368	-4.28025								II	21.1619	0.93863
YGL027C	CWH41	Processing alpha glucosidase I; ER type II integral membrane N-glycoprotein involved in assembly of cell wall beta 1,6 glucan and asparagine-linked protein glycosylation; also involved in ER protein quality control and sensing of ER stress	IV	2.37805	-1.50567	-1.50567	-2.77296							IV	73.8427	3.27527
YMR276W	DSK2	Nuclear-enriched ubiquitin-like polyubiquitin-binding protein; required for spindle pole body (SPB) duplication and for transit through the G2/M phase of the cell cycle; involved in proteolysis; interacts with the proteasome; protein abundance increases in response to DNA replication stress	IV	1.34552	-2.28025	-2.28025	-2.28025						IV	IV	173.803	7.70897
YBL007C	SLA1	Cytoskeletal protein binding protein; required for assembly of the cortical actin cytoskeleton; interacts with proteins regulating actin dynamics and proteins required for endocytosis; found in the nucleus and cell cortex; has 3 SH3 domains	IV	0.798376	-3.77296								III	III	140.985	6.25334
YPR165W	RHO1	GTP-binding protein of the rho subfamily of Ras-like proteins; involved in establishment of cell polarity; regulates protein kinase C (Pkc1p) and the cell wall synthesizing enzyme 1,3-beta-glucan synthase (Fks1p and Gsc2p)	IV	1.15841	-1.09329	-3.00442	-3.00442					IV		IV	478.277	21.2138
YBR205W	KTR3	Putative alpha-1,2-mannosyltransferase; involved in O- and N-linked protein glycosylation; member of the KRE2/MNT1 mannosyltransferase family; Svp26p mediates uptake of Ktr3p into COPII vesicles; relocalizes from nucleus to vacuole upon DNA replication stress	IV	0.951827	-1.11033	-1.69529								IV	92.7234	4.11271
YNL064C	YDJ1	Type I HSP40 co-chaperone; involved in regulation of HSP90 and HSP70 functions; acts as an adaptor that helps Rsp5p recognize cytosolic misfolded proteins for ubiquitylation after heat shock; critical for determining cell size at Start as a function of growth rate; involved in protein translocation across membranes; member of the DnaJ family	IV	1.27935	1.20331	-4.28025	-4.28025	-4.28025					II	III	483.939	21.4649
YDR277C	MTH1	Negative regulator of the glucose-sensing signal transduction pathway; required for repression of transcription by Rgt1p; interacts with Rgt1p and the Snf3p and Rgt2p glucose sensors; phosphorylated by Yck1p, triggering Mth1p degradation; MTH1 has a paralog, STD1, that arose from the whole genome duplication	IV	0.440631	-3.77296	-3.77296								III	11.0891	0.491853
YLR130C	ZRT2	Low-affinity zinc transporter of the plasma membrane; transcription is induced under low-zinc conditions by the Zap1p transcription factor	IV	1.01304	-3.77296	-3.77296	-3.77296								77.4516	3.43534
YDL179W	PCL9	Cyclin; forms a functional kinase complex with Pho85p cyclin-dependent kinase (Cdk), expressed in late M/early G1 phase, activated by Swi5p; PCL9 has a paralog, PCL2, that arose from the whole genome duplication	IV	1.65435	0.673945	-4.28025							III		31.7947	1.41024
YNL084C	END3	EH domain-containing protein involved in endocytosis; actin cytoskeletal organization and cell wall morphogenesis; forms a complex with Sla1p and Pan1p	IV	0.292178	-1.28025									III	79.8849	3.54327
YIR037W	HYR1	Thiol peroxidase; functions as a hydroperoxide receptor to sense intracellular hydroperoxide levels and transduce a redox signal to the Yap1p transcription factor; HYR1 has a paralog, GPX1, that arose from the whole genome duplication	IV	0.755039	-3.77296							IV			232.197	10.299
YPR105C	COG4	Essential component of the conserved oligomeric Golgi complex; a cytosolic tethering complex (Cog1p through Cog8p) that functions in protein trafficking to mediate fusion of transport vesicles to Golgi compartments	IV	0.351575	-0.651358										45.0139	1.99657
YLR008C	PAM18	Subunit of the import motor (PAM complex); the PAM complex is a component of the Translocase of the Inner Mitochondrial membrane (TIM23 complex); essential J-protein cochaperone that stimulates Ssc1p ATPase activity to drive import; inhibited by Pam16p	IV	0.384859	-1.77296							II		IV	133.815	5.93532
