# Supplementary material
Source: HighWire-hosted journal article supplement (doi:10.1101/rna.062687.117)
Supplement: Supplemental_Figure_Legends.docx [file Supplemental_Figure_Legends.docx]

**Supplementary Figure S1.** Puf4p targets were reproducibly U-tagged, and enriched for 9BEs and ribosome biogenesis-related functions. **(A)** Scatter plot of the number of U-tagged RNAs detected for each Puf4p target (507) in two biological replicates of PUF4-PUP yeast. TRPM, Tagged RNAs per million uniquely mapped reads. **(B)** Logo of the enriched sequence motif present in the 3ʹ UTRs of Puf4p targets identified via MEME. **(C)** Bar chart illustrating the *P­*-values for the indicated Gene Ontology terms enriched in Puf4p targets. **(D)** Empirical cumulative distribution of Puf4p target classes and all yeast mRNAs (all mRNAs) for mRNA decay rate fold change (puf4/wild-type) in yeast with and without *PUF4* mined from published data(Sun et al. 2013). Kolmogorov-Smirnov (KS) test *P*-values for pair-wise comparisons are indicated. **(E)** Line graph indicating the *P­*-values for the indicated Gene Ontology terms enriched in each class of Puf4p targets.

Related to Figure 2.

**Supplementary Figure S2.** The Puf5p sub-network was identified via RNA Tagging. **(A)** Scatter plot of the number of U-tagged RNAs detected for each Puf5p target (916) in two biological replicates of PUF5-PUP yeast. TRPM, Tagged RNAs per million uniquely mapped reads. **(B)** Bar chart illustrating the *P­*-values for the indicated Gene Ontology terms enriched in Puf5p targets. **(C)** Box plot of 9BE and 10BE conservation scores for all yeast mRNAs (all mRNAs) and Puf5p target classes. **(D)** Empirical cumulative distribution of all yeast mRNAs (all mRNAs) (black), all Puf5p targets (blue), and class I Puf5p targets (orange) for mRNA decay rate fold change (puf5/wild-type) in yeast with and without *PUF5* mined from published data(Sun et al. 2013).

Related to Figure 3.

**Supplementary Figure S3.** Reanalysis of the Puf3p sub-network. **(A)** Heat map displaying results of the *k*-means clustering analysis of all 476 Puf3p targets. Each row represents a single Puf3p target. Columns refer to the length of the U-tag detected on reads for each gene, from at least 1 uridine (leftmost column) to at least 8 uridines (rightmost). Puf3p target classes are indicated (I, II, III, & IV). The average PBE enriched in each class of targets is also indicated, with the y-axis in bits. Puf3p RNA Tagging data was reanalyzed here from published data(Lapointe et al. 2015). **(B)** Empirical cumulative distribution of all yeast mRNAs (all mRNAs) (black), and class I (red), class II (teal), class III (brown), and class IV (gold) Puf3p targets for mRNA decay rate fold change (puf3/wild-type) in yeast with and without *PUF3* mined from published data(Sun et al. 2013). Kolmogorov-Smirnov (KS) test *P*-values for pair-wise comparisons are indicated. **(C)** Box plot of 8BE conservation scores for all yeast mRNAs (all mRNAs) and Puf3p target classes.

Related to Figure 4.

**Supplementary Figure S4.** Analyses of the PUF super-network. **(A)** Plot of the fraction of the indicated groups for targets present in class I or II. For example, ~45% of genes U-tagged solely by Puf3p (Puf3p only) were present in class I or II of Puf3p, and ~45% of genes U-tagged by both Puf4p and Puf5p were present in class I or II of both data sets. **(B)** Plot of the fraction of each class of Puf4p targets that were U-tagged by both PUF4-PUP and PUF5-PUP. For example, ~80% of class I Puf4p targets were also bound by Puf5p. **(C)** Plot of the fraction of each class of Puf5p targets that were U-tagged by both PUF4-PUP and PUF5-PUP. For example, ~55% of class I Puf5p targets were also bound by Puf4p. **(D)** Growth assays of the indicated deletion strains in the presence of the indicated compounds. Saturated cultures were diluted to A660 ≈ 0.75 and then serially diluted 10-fold. Yeast were spotted on the indicated plates and incubated at 30 °C. Single-copy (*CEN*) *PUF4* or *PUF5* plasmids were added as noted. **(E)** Enrichment of the indicated groups for 8BEs, 9BEs, and 10BEs relative to all yeast mRNAs (all mRNAs). **(F)** Pie charts showing the distribution of PBEs by number (top) and length (bottom) in genes present in class I or II of both Puf4p and Puf5p targets (red genes in panel a). **(G)** Box plot of 9BE and 10BE conservation scores for all yeast mRNAs (all mRNAs) and the indicated groups of PUF targets. “Shared Class I-II” indicates the genes were present in class I or II of both Puf4p and Puf5p targets.

Related to Figure 4.

**Supplementary Figure S5.** Relative abundance of PUF4-PUP and PUF5-PUP in RNA Tagging yeast strains. **(A)** Western blot depicting PUF4-PUP protein levels following 3-fold serial dilutions of cell extract. High- and low- contrast images of the same blots are shown. **(B)** Western blot depicting relative protein abundance of PUF4-PUP and PUF5-PUP in the indicated deletion strains. Extract corresponding to 0.3 OD of yeast was loaded in each lane, and two biological replicates are shown.

Related to Figures 5‒7.

**Supplementary Figure S6.** Puf4p reproducibly U-tagged 1,369 RNAs in the absence of Puf5p. **(A)** Scatter plot of the number of U-tagged RNAs detected for each PUF4-PUP;*puf5* target (1,369) in two biological replicates. TRPM, Tagged RNAs per million uniquely mapped reads. **(B)** Heat map displaying results of the *k*-means clustering analysis of all 1,369 PUF4-PUP;*puf5* targets. Each row represents a single target. Columns refer to the length of the U-tag detected on reads for each gene, from at least 1 uridine (leftmost column) to at least 8 uridines (rightmost). PUF4-PUP;*puf5* target classes are indicated (I, II, III, & IV). **(C)** Enrichment of the indicated groups of genes for 8BEs, 9BEs, and 10BEs relative to all yeast mRNAs (all mRNAs). “Retained and shared targets” (302) were RNAs U-tagged by PUF4-PUP, PUF5-PUP, and PUF4-PUP;*puf5*. “Retained Puf4p targets” (194) were RNAs U-tagged by PUF4-PUP and PUF4-PUP;*puf5*. “Gained Puf5p targets” (322) were RNAs U-tagged by PUF5-PUP and PUF4-PUP;*puf5*. “New Puf4p targets” (551) were RNAs U-tagged solely by PUF4-PUP;*puf5*. “Missed Puf5p targets” were RNAs U-tagged solely by PUF5-PUP. **(D)** Plot of the fraction of each PUF4-PUP;*puf5* target class that were targets of both Puf4p and Puf5p (orange), Puf4p (blue), Puf5p (purple), or neither of the PUF proteins (gray).

Related to Figure 6.

**Supplementary Figure S7.** Puf5p reproducibly U-tagged 466 RNAs in the absence of Puf4p. **(A)** Scatter plot of the number of U-tagged RNAs detected for each PUF5-PUP;puf4 target (466) in two biological replicates. TRPM, Tagged RNAs per million uniquely mapped reads. **(B)** Heat map displaying results of the *k*-means clustering analysis of all 466 PUF5-PUP;puf4 targets. Each row represents a single target. Columns refer to the length of the U-tag detected on reads for each gene, from at least 1 uridine (leftmost column) to at least 8 uridines (rightmost). PUF5-PUP;puf4 target classes are indicated (I, II, III, & IV).

Related to Figure 6.
